# Supplementary material for: A novel SATB1 protein isoform with different biophysical properties
Source: Front Cell Dev Biol. 2023 Aug 11;11:1242481. doi: 10.3389/fcell.2023.1242481 (PMC10457122; doi:10.3389/fcell.2023.1242481)
Supplement: Supplementary file 1 [file DataSheet4.xlsx]

## Sheet: analysis_with_BAM_files_used
Gene	Node	Coord	Strand	Type	Psi_A	Psi_B	DeltaPsi	Probability	Complexity	Entropy
2310035C23Rik	1	chr1:105663883-105663912	+	TS	0.078971	0.018311	0.06066	0.799	K2	0.6185
2310035C23Rik	2	chr1:105663913-105663922	+	TS	0.92065	0.98166	-0.06101	0.79	K2	0.6185
2310035C23Rik	3	chr1:105663923-105664633	+	TS	0.0024771	0.0026844	-0.00020728	0.503	K2	0.6185
2310035C23Rik	4	chr1:105664974-105678162	+	AA	0.18526	0.15182	0.03344	0.634	K1	0.6672
2310035C23Rik	5	chr1:105678163-105678252	+	CE	0.98687	0.9877	-0.00083571	0.502	K0	0
2310035C23Rik	6	chr1:105686949-105687020	+	CE	0.9696	0.91623	0.053374	0.834	K4	1.8218
2310035C23Rik	7	chr1:105687130-105687185	+	CE	0.97846	0.96942	0.0090451	0.621	K4	1.8218
2310035C23Rik	8	chr1:105687282-105687395	+	CE	0.98098	0.97175	0.0092265	0.668	K4	1.8218
2310035C23Rik	9	chr1:105691906-105692109	+	CE	0.98248	0.97251	0.0099764	0.707	K4	1.8218
2310035C23Rik	10	chr1:105692212-105692303	+	CE	0.70923	0.66083	0.048392	0.665	K4	1.8218
2310035C23Rik	11	chr1:105692884-105693177	+	CE	0.98174	0.97134	0.010401	0.674	K4	1.8218
2310035C23Rik	12	chr1:105695428-105695503	+	CE	0.94921	0.92517	0.024032	0.723	K4	1.8218
2310035C23Rik	13	chr1:105696501-105696596	+	CE	0.97994	0.97113	0.0088154	0.627	K4	1.8218
2310035C23Rik	14	chr1:105703931-105704043	+	CE	0.99449	0.99512	-0.00062796	0.548	K0	0
2310035C23Rik	15	chr1:105713849-105713939	+	CE	0.99399	0.99469	-0.00069945	0.523	K0	0
2310035C23Rik	16	chr1:105713940-105716212	+	AD	0.073578	0.13847	-0.06489	0.869	K1	0.5739
2310035C23Rik	17	chr1:105716778-105716849	+	CE	0.993	0.99311	-0.0001176	0.512	K0	0
2310035C23Rik	18	chr1:105718775-105718843	+	CE	0.99554	0.99158	0.0039631	0.675	K2	0.1935
2310035C23Rik	19	chr1:105718844-105718915	+	AD	0.98334	0.98423	-0.00089375	0.568	K2	0.1935
2310035C23Rik	20	chr1:105719452-105719616	+	CE	0.99422	0.99306	0.0011569	0.585	K0	0
2310035C23Rik	21	chr1:105721268-105721415	+	CE	0.58938	0.60893	-0.019555	0.61	K3	2.2762
2310035C23Rik	22	chr1:105725649-105725805	+	CE	0.99079	0.98137	0.0094247	0.641	K3	2.2762
2310035C23Rik	23	chr1:105726343-105726466	+	CE	0.9797	0.94902	0.030681	0.881	K3	2.2762
2310035C23Rik	24	chr1:105727940-105727988	+	CE	0.98822	0.97845	0.009771	0.613	K3	2.2762
2310035C23Rik	25	chr1:105731201-105731209	+	AA	0.73599	0.7174	0.018597	0.579	K3	2.2762
2310035C23Rik	26	chr1:105731210-105731212	+	AA	0.92633	0.86095	0.065385	0.847	K3	2.2762
2310035C23Rik	27	chr1:105731213-105731280	+	CE	0.97834	0.92858	0.04976	0.891	K3	2.2762
2310035C23Rik	28	chr1:105734518-105734624	+	CE	0.99214	0.97805	0.014089	0.746	K3	2.2762
2310035C23Rik	29	chr1:105735923-105736022	+	CE	0.99222	0.99002	0.0021951	0.552	K0	0
2310035C23Rik	30	chr1:105740435-105740517	+	CE	0.4173	0.48958	-0.072282	0.709	K3	1.9579
2310035C23Rik	31	chr1:105741013-105741095	+	CE	0.73132	0.71485	0.016477	0.559	K3	1.9579
2310035C23Rik	32	chr1:105741297-105741360	+	CE	0.98693	0.97423	0.012703	0.697	K3	1.9579
2310035C23Rik	33	chr1:105743211-105743349	+	CE	0.99252	0.99274	-0.00021457	0.532	K0	0
2310035C23Rik	34	chr1:105746069-105746185	+	CE	0.99174	0.99186	-0.00011838	0.515	K0	0
2310035C23Rik	35	chr1:105750322-105750410	+	CE	0.99198	0.99218	-0.00019886	0.517	K0	0
2310035C23Rik	36	chr1:105750973-105751043	+	CE	0.97389	0.92018	0.053714	0.848	K1	0.5902
2310035C23Rik	37	chr1:105753503-105753711	+	TE	0.28968	0.082558	0.20712	0.99	K2	0.9534
2310035C23Rik	38	chr1:105753712-105754075	+	TE	0.001131	0.0011869	-5.5938e-05	0.526	K2	0.9534
2310035C23Rik	39	chr1:105754076-105755191	+	TE	0.71063	0.91714	-0.20652	0.989	K2	0.9534
Farsb	1	chr1:78488860-78488897	-	TS	0.95384	0.90853	0.045306	0.685	K1	0.0467
Farsb	2	chr1:78488785-78488859	-	TS	0.045498	0.090938	-0.045439	0.667	K1	0.0467
Farsb	3	chr1:78482308-78482363	-	CE	0.99791	0.99695	0.00096366	0.524	K0	0
Farsb	4	chr1:78480014-78480111	-	AA	0.96461	0.95255	0.012058	0.558	K1	0.4375
Farsb	5	chr1:78479957-78480013	-	CE	0.99677	0.99587	0.00090346	0.545	K0	0
Farsb	6	chr1:78478193-78478262	-	CE	0.99605	0.99253	0.0035205	0.694	K2	0.3277
Farsb	7	chr1:78476190-78476305	-	CE	0.98812	0.98348	0.00465	0.618	K2	0.4712
Farsb	8	chr1:78473182-78476189	-	AD	0.029436	0.04877	-0.019334	0.73	K2	0.4712
Farsb	9	chr1:78472484-78472634	-	CE	0.99707	0.99618	0.00088706	0.539	K0	0
Farsb	10	chr1:78471083-78471191	-	CE	0.9974	0.9961	0.001298	0.573	K0	0
Farsb	11	chr1:78469252-78469322	-	CE	0.99732	0.99608	0.0012398	0.59	K0	0
Farsb	12	chr1:78467971-78468032	-	CE	0.99765	0.99667	0.00098434	0.59	K0	0
Farsb	13	chr1:78466967-78467018	-	CE	0.99794	0.99547	0.0024667	0.627	K0	0
Farsb	14	chr1:78465011-78466966	-	AD	0.0087599	0.045958	-0.037198	0.926	K2	0.2905
Farsb	15	chr1:78463272-78463333	-	CE	0.99319	0.99569	-0.0025002	0.686	K1	0.0743
Farsb	16	chr1:78462835-78463042	-	CE	0.99231	0.9964	-0.0040945	0.728	K1	0.0743
Farsb	17	chr1:78462306-78462386	-	CE	0.99198	0.99542	-0.0034402	0.677	K1	0.0743
Farsb	18	chr1:78458565-78458657	-	CE	0.99675	0.99549	0.0012631	0.554	K0	0
Farsb	19	chr1:78454754-78454871	-	CE	0.99595	0.9952	0.00075429	0.532	K0	0
Farsb	20	chr1:78443635-78443790	-	CE	0.99216	0.99106	0.001103	0.555	K0	0
Farsb	21	chr1:78433743-78443634	-	AD	0.20456	0.17868	0.025883	0.613	K1	0.7468
Farsb	22	chr1:78425193-78425345	-	CE	0.99308	0.98798	0.0051028	0.599	K0	0
Tmem63a	2	chr1:180942511-180942559	+	AD	0.70784	0.72803	-0.020191	0.545	K1	0.9233
Tmem63a	3	chr1:180944035-180944096	+	AF	0.07242	0.069864	0.0025567	0.509	K0	0
Tmem63a	4	chr1:180946566-180946765	+	CE	0.96018	0.95771	0.0024684	0.51	K0	0
Tmem63a	5	chr1:180948813-180948892	+	CE	0.97193	0.96081	0.011121	0.557	K0	0
Tmem63a	6	chr1:180952132-180952195	+	CE	0.9746	0.9693	0.0053046	0.545	K0	0
Tmem63a	7	chr1:180952981-180953018	+	CE	0.9792	0.97688	0.0023293	0.525	K0	0
Tmem63a	8	chr1:180954808-180954950	+	CE	0.98582	0.98076	0.0050589	0.587	K0	0
Tmem63a	9	chr1:180955993-180956044	+	CE	0.98803	0.98204	0.0059902	0.589	K0	0
Tmem63a	10	chr1:180956420-180956528	+	CE	0.98167	0.97414	0.0075275	0.585	K0	0
Tmem63a	11	chr1:180957977-180958047	+	CE	0.97991	0.97861	0.0013055	0.502	K0	0
Tmem63a	12	chr1:180960426-180960506	+	CE	0.97386	0.986	-0.012141	0.675	K1	0.195
Tmem63a	13	chr1:180960735-180960858	+	CE	0.98892	0.98532	0.0036025	0.561	K0	0
Tmem63a	14	chr1:180961048-180961181	+	CE	0.9774	0.98229	-0.0048899	0.627	K1	0.1425
Tmem63a	15	chr1:180962347-180962484	+	CE	0.9862	0.98001	0.0061885	0.563	K0	0
Tmem63a	16	chr1:180962999-180963152	+	CE	0.98727	0.97979	0.0074842	0.623	K0	0
Tmem63a	17	chr1:180965540-180965646	+	CE	0.98699	0.97528	0.011713	0.622	K0	0
Tmem63a	18	chr1:180965744-180965830	+	CE	0.98339	0.97024	0.013149	0.623	K0	0
Tmem63a	19	chr1:180966468-180966530	+	CE	0.98434	0.97415	0.010192	0.615	K0	0
Tmem63a	20	chr1:180968745-180968907	+	CE	0.98689	0.97418	0.012707	0.669	K0	0
Tmem63a	21	chr1:180970180-180970285	+	CE	0.98746	0.9693	0.018162	0.679	K0	0
Tmem63a	22	chr1:180971967-180972134	+	CE	0.9875	0.96886	0.01864	0.706	K0	0
Tmem63a	23	chr1:180972662-180972715	+	AA	0.079438	0.12993	-0.050487	0.571	K1	0.6636
Tmem63a	24	chr1:180972716-180972831	+	CE	0.98506	0.97528	0.0097751	0.568	K0	0
Tmem63a	25	chr1:180973140-180973202	+	CE	0.98579	0.97915	0.0066355	0.619	K0	0
Tmem63a	26	chr1:180974169-180975103	+	TE	0.0034134	0.0048341	-0.0014207	0.583	K1	0.0063
Tmem63a	27	chr1:180975104-180975112	+	TE	0.99665	0.99504	0.0016139	0.589	K1	0.0063
Raph1	4	chr1:60533287-60533406	-	CE	0.88353	0.88113	0.002392	0.558	K0	0
Raph1	5	chr1:60527384-60527489	-	CE	0.93074	0.93765	-0.0069075	0.53	K0	0
Raph1	6	chr1:60525592-60526100	-	CE	0.93741	0.9422	-0.0047904	0.521	K0	0
Raph1	7	chr1:60518980-60519060	-	CE	0.31078	0.13884	0.17194	0.838	K2	1.0132
Raph1	8	chr1:60510417-60510491	-	CE	0.10898	0.19997	-0.090996	0.763	K1	0.6715
Raph1	9	chr1:60503518-60503595	-	CE	0.88971	0.93167	-0.041961	0.661	K0	0
Raph1	10	chr1:60502825-60502984	-	CE	0.85139	0.92002	-0.068629	0.67	K0	0
Raph1	11	chr1:60501756-60501877	-	CE	0.90979	0.92004	-0.010249	0.533	K0	0
Raph1	12	chr1:60500555-60500620	-	CE	0.92778	0.94173	-0.013944	0.525	K0	0
Raph1	13	chr1:60499480-60499623	-	CE	0.92172	0.95108	-0.029358	0.605	K0	0
Raph1	14	chr1:60498424-60498534	-	CE	0.89218	0.93809	-0.045915	0.644	K0	0
Raph1	15	chr1:60496225-60496323	-	CE	0.89941	0.90602	-0.0066116	0.503	K0	0
Raph1	16	chr1:60495415-60495535	-	CE	0.8925	0.89828	-0.0057766	0.536	K0	0
Raph1	17	chr1:60493538-60493680	-	CE	0.91281	0.89958	0.013227	0.516	K0	0
Raph1	20	chr1:60483236-60483340	-	TE	0.40389	0.25568	0.14821	0.613	K1	0.8646
Raph1	21	chr1:60482292-60483235	-	TE	0.59622	0.74444	-0.14823	0.608	K1	0.8646
Imp4	2	chr1:34440041-34440149	+	CE	0.99463	0.99276	0.0018667	0.566	K0	0
Imp4	3	chr1:34442910-34442993	+	CE	0.99542	0.99364	0.0017818	0.602	K0	0
Imp4	4	chr1:34442994-34443104	+	AD	0.11585	0.14464	-0.028788	0.682	K1	0.6237
Imp4	5	chr1:34443378-34443487	+	CE	0.99624	0.99497	0.0012686	0.55	K0	0
Imp4	6	chr1:34443563-34443695	+	CE	0.99596	0.99475	0.0012093	0.565	K0	0
Imp4	7	chr1:34443769-34443923	+	CE	0.99567	0.99452	0.001151	0.541	K0	0
Imp4	8	chr1:34443997-34444091	+	CE	0.99618	0.99491	0.0012724	0.553	K0	0
Imp4	9	chr1:34444196-34444269	+	CE	0.99586	0.99449	0.0013774	0.564	K0	0
Kansl3	6	chr1:36367769-36367911	-	CE	0.98877	0.98731	0.0014512	0.547	K0	0
Kansl3	7	chr1:36367750-36367768	-	AD	0.28749	0.29193	-0.0044435	0.502	K2	1.3038
Kansl3	8	chr1:36365653-36365690	-	AA	0.37905	0.31944	0.059604	0.62	K2	1.8431
Kansl3	9	chr1:36365645-36365652	-	AA	0.90618	0.94233	-0.036149	0.773	K2	1.8431
Kansl3	10	chr1:36365633-36365644	-	AA	0.91021	0.94347	-0.033254	0.745	K2	1.8431
Kansl3	13	chr1:36365482-36365585	-	CE	0.9931	0.99334	-0.00024415	0.514	K0	0
Kansl3	14	chr1:36358370-36358460	-	CE	0.99308	0.99301	6.6385e-05	0.53	K0	0
Kansl3	15	chr1:36358040-36358225	-	CE	0.99293	0.99196	0.00097706	0.516	K0	0
Kansl3	16	chr1:36354649-36354780	-	CE	0.99207	0.98996	0.0021064	0.542	K0	0
Kansl3	17	chr1:36354162-36354214	-	AA	0.94045	0.91973	0.020716	0.654	K1	0.467
Kansl3	18	chr1:36354098-36354161	-	CE	0.99505	0.99367	0.0013774	0.564	K0	0
Kansl3	19	chr1:36353772-36353873	-	CE	0.99508	0.99424	0.00084067	0.522	K0	0
Kansl3	20	chr1:36353594-36353665	-	CE	0.99471	0.99398	0.00073394	0.505	K0	0
Kansl3	21	chr1:36351926-36352000	-	CE	0.99559	0.99477	0.0008147	0.526	K0	0
Kansl3	22	chr1:36351633-36351790	-	CE	0.99552	0.99484	0.00067273	0.522	K0	0
Kansl3	23	chr1:36349402-36349465	-	CE	0.99345	0.9923	0.0011482	0.535	K0	0
Kansl3	24	chr1:36348818-36349018	-	CE	0.99359	0.99113	0.0024632	0.587	K0	0
Kansl3	25	chr1:36348525-36348681	-	CE	0.99441	0.99358	0.00083386	0.531	K0	0
Kansl3	26	chr1:36347217-36347294	-	CE	0.17912	0.11672	0.062398	0.858	K1	0.6971
Kansl3	27	chr1:36345838-36346029	-	CE	0.99424	0.994	0.00023989	0.541	K0	0
Kansl3	28	chr1:36345385-36345466	-	CE	0.99189	0.99137	0.00051536	0.527	K0	0
Kansl3	29	chr1:36344916-36345046	-	CE	0.98915	0.99024	-0.0010861	0.52	K0	0
Kansl3	30	chr1:36344070-36344179	-	CE	0.99108	0.99162	-0.00053926	0.52	K0	0
Kansl3	31	chr1:36343673-36343895	-	CE	0.99211	0.99328	-0.0011699	0.552	K0	0
Kansl3	32	chr1:36343251-36343384	-	CE	0.9936	0.99383	-0.00022729	0.509	K0	0
Kansl3	33	chr1:36337573-36337651	-	TE	0.78372	0.7294	0.054321	0.872	K1	0.8933
Kansl3	34	chr1:36335730-36337572	-	TE	0.21608	0.27077	-0.054692	0.885	K1	0.8933
Zbtb18	1	chr1:177444295-177444652	+	TS	0.0080132	0.0062964	0.0017168	0.571	K1	0
Zbtb18	2	chr1:177444653-177444738	+	TS	0.99204	0.99378	-0.0017393	0.583	K1	0
Zbtb18	3	chr1:177444739-177444822	+	CE	0.97966	0.98525	-0.0055838	0.568	K0	0
Zbtb18	4	chr1:177444938-177445055	+	AF	0.05557	0.05512	0.00045026	0.527	K0	0
Zbtb18	6	chr1:177447089-177447776	+	CE	0.99413	0.99468	-0.00055178	0.519	K0	0
Zbtb18	7	chr1:177447777-177447888	+	RI	0.6615	0.64773	0.013772	0.589	K1	0.9692
Zbtb18	8	chr1:177447889-177450760	+	TE	0.00030575	0.00026539	4.0365e-05	0.544	K1	0
Zbtb18	9	chr1:177450761-177450764	+	TE	0.99969	0.99973	-3.7702e-05	0.548	K1	0
Lbr	2	chr1:181841940-181842287	-	AD	0.030476	0.031927	-0.001451	0.569	K4	0.2802
Lbr	3	chr1:181841836-181841939	-	AD	0.027767	0.027801	-3.354e-05	0.51	K2	0.2392
Lbr	4	chr1:181841785-181841835	-	AD	0.027413	0.019572	0.007841	0.737	K2	0.2392
Lbr	5	chr1:181841727-181841784	-	AD	0.030292	0.021284	0.0090081	0.772	K1	0.215
Lbr	6	chr1:181840500-181840610	-	CE	0.00095683	0.0011284	-0.00017153	0.533	K0	0
Lbr	7	chr1:181839700-181839802	-	CE	0.048632	0.028425	0.020207	0.856	K1	0.302
Lbr	8	chr1:181838378-181838556	-	CE	0.99951	0.99937	0.00014187	0.538	K0	0
Lbr	9	chr1:181836082-181836288	-	CE	0.99933	0.99922	0.00010695	0.527	K0	0
Lbr	10	chr1:181836062-181836081	-	AD	0.99928	0.99904	0.00024142	0.556	K0	0
Lbr	11	chr1:181836058-181836061	-	AD	0.99924	0.99894	0.00029746	0.553	K0	0
Lbr	12	chr1:181832230-181832232	-	AA	0.9993	0.999	0.00029961	0.615	K0	0
Lbr	13	chr1:181832149-181832229	-	CE	0.99948	0.99935	0.00013009	0.542	K0	0
Lbr	14	chr1:181831542-181831734	-	CE	0.9994	0.99933	7.1166e-05	0.528	K0	0
Lbr	15	chr1:181830049-181831541	-	AD	0.10165	0.10873	-0.0070873	0.522	K1	0.6254
Lbr	16	chr1:181828712-181828908	-	CE	0.99913	0.99897	0.00016173	0.508	K0	0
Lbr	17	chr1:181825622-181825676	-	CE	0.99914	0.99894	0.00020441	0.565	K0	0
Lbr	18	chr1:181825312-181825621	-	AD	0.049171	0.06953	-0.020359	0.783	K1	0.4558
Lbr	19	chr1:181821436-181821627	-	CE	0.99932	0.99917	0.00014379	0.551	K0	0
Lbr	20	chr1:181820703-181820777	-	CE	0.99942	0.99924	0.00017964	0.532	K0	0
Lbr	21	chr1:181820674-181820702	-	AD	0.99931	0.99913	0.00018128	0.538	K0	0
Lbr	22	chr1:181820089-181820673	-	AD	0.0013659	0.0016348	-0.00026888	0.544	K0	0
Lbr	23	chr1:181819864-181819989	-	CE	0.99938	0.99925	0.00012996	0.52	K0	0
Lbr	24	chr1:181818840-181819008	-	CE	0.99942	0.9993	0.00011036	0.513	K0	0
Lbr	25	chr1:181817489-181817569	-	CE	0.9995	0.99945	4.4012e-05	0.51	K0	0
Lbr	26	chr1:181817265-181817387	-	CE	0.99954	0.9995	3.4727e-05	0.532	K0	0
3110009E18Rik	4	chr1:120121218-120121810	+	AD	0.5498	0.64851	-0.098708	0.658	K1	0.9996
3110009E18Rik	5	chr1:120121811-120126392	+	AD	0.55137	0.64652	-0.095149	0.634	K1	0.9996
3110009E18Rik	6	chr1:120150603-120150747	+	CE	0.96558	0.96652	-0.00093358	0.555	K0	0
3110009E18Rik	7	chr1:120160606-120160656	+	CE	0.98198	0.97822	0.0037552	0.529	K0	0
3110009E18Rik	8	chr1:120166135-120166172	+	CE	0.98583	0.98232	0.0035077	0.506	K0	0
3110009E18Rik	9	chr1:120171401-120171482	+	CE	0.87593	0.87144	0.0044936	0.53	K1	0.6774
Tatdn3	1	chr1:191062906-191062932	-	TS	0.49585	0.36457	0.13128	0.557	K2	0.5053
Tatdn3	2	chr1:191062905-191062905	-	TS	0.46057	0.57785	-0.11728	0.616	K2	0.5053
Tatdn3	3	chr1:191062801-191062904	-	TS	0.09035	0.13509	-0.044737	0.625	K2	0.5053
Tatdn3	4	chr1:191061225-191061257	-	CE	0.97798	0.90905	0.068921	0.774	K1	0.7069
Tatdn3	5	chr1:191060113-191060186	-	CE	0.97276	0.90991	0.062845	0.694	K1	0.7069
Tatdn3	6	chr1:191058827-191058911	-	CE	0.97153	0.97189	-0.00035329	0.516	K0	0
Tatdn3	7	chr1:191056363-191056425	-	CE	0.98171	0.97927	0.0024363	0.519	K0	0
Tatdn3	8	chr1:191055262-191055371	-	CE	0.97901	0.96862	0.010391	0.605	K0	0
Tatdn3	9	chr1:191054856-191054911	-	CE	0.94895	0.91461	0.034344	0.625	K0	0
Tatdn3	10	chr1:191052860-191052972	-	CE	0.90458	0.71769	0.18688	0.868	K3	2.1646
Tatdn3	11	chr1:191049421-191052859	-	AD	0.55013	0.52233	0.027801	0.527	K3	2.1646
Tatdn3	12	chr1:191049360-191049362	-	AA	0.39794	0.51946	-0.12152	0.617	K2	1.9129
Tatdn3	13	chr1:191049282-191049359	-	CE	0.74804	0.95617	-0.20814	0.846	K2	1.4431
Tatdn3	14	chr1:191046321-191046336	-	AA	0.074147	0.064798	0.0093489	0.553	K0	0
Tatdn3	15	chr1:191045842-191046320	-	TE	0.98135	0.65938	0.32196	0.547	K2	0
Tatdn3	16	chr1:191045838-191045841	-	TE	0.017872	0.34035	-0.32248	0.579	K2	0
Tatdn3	17	chr1:191045826-191045837	-	TE	0.01859	0.022307	-0.0037173	0.54	K2	0
Uck2	2	chr1:167284540-167284775	-	AD	0.29227	0.24199	0.050281	0.632	K2	1.1357
Uck2	3	chr1:167283838-167284539	-	AD	0.24769	0.21639	0.031294	0.632	K1	0.9782
Uck2	4	chr1:167273363-167283837	-	AD	0.24457	0.21887	0.025695	0.607	K1	0.9782
Uck2	5	chr1:167243558-167273362	-	AD	0.27023	0.22709	0.043145	0.634	K1	0.9915
Uck2	6	chr1:167237489-167237648	-	CE	0.9963	0.99654	-0.00023984	0.536	K0	0
Uck2	7	chr1:167236603-167236699	-	CE	0.99835	0.99827	8.1791e-05	0.51	K0	0
Uck2	8	chr1:167234692-167234834	-	CE	0.99864	0.99848	0.0001539	0.512	K0	0
Uck2	9	chr1:167229893-167229990	-	CE	0.98658	0.97835	0.0082316	0.689	K1	0.2096
Uck2	10	chr1:167227732-167227780	-	CE	0.99861	0.99841	0.00020824	0.54	K0	0
Nck2	2	chr1:43446028-43457427	+	AD	0.6243	0.78672	-0.16242	0.927	K3	2.4374
Nck2	3	chr1:43457428-43457442	+	AD	0.58798	0.56652	0.021459	0.555	K3	2.2414
Nck2	4	chr1:43457539-43457657	+	CE	0.18969	0.29507	-0.10538	0.785	K3	2.2414
Nck2	5	chr1:43457658-43457674	+	AD	0.41424	0.45015	-0.035912	0.541	K3	2.3179
Nck2	6	chr1:43460957-43509620	+	AA	0.27883	0.4574	-0.17858	0.846	K3	2.0014
Nck2	7	chr1:43509621-43509783	+	CE	0.98903	0.98641	0.0026126	0.549	K0	0
Nck2	8	chr1:43509784-43513726	+	AD	0.34732	0.30938	0.037941	0.604	K2	1.5668
Nck2	9	chr1:43513727-43513833	+	AD	0.38063	0.31149	0.069146	0.66	K2	1.5668
Nck2	10	chr1:43533552-43533554	+	AA	0.49042	0.57316	-0.082746	0.731	K1	1
Nck2	11	chr1:43533555-43533793	+	CE	0.99493	0.99385	0.0010858	0.528	K0	0
Nck2	12	chr1:43533794-43542809	+	AD	0.29835	0.33309	-0.034741	0.589	K1	0.9987
Nck2	13	chr1:43553861-43554582	+	CE	0.99643	0.9948	0.0016304	0.567	K0	0
Pla2g4a	2	chr1:149932658-149932756	-	CE	0.95584	0.95467	0.0011784	0.529	K0	0
Pla2g4a	3	chr1:149922244-149922439	-	AF	0.08706	0.077465	0.0095951	0.53	K0	0
Pla2g4a	4	chr1:149922055-149922136	-	CE	0.9437	0.9432	0.00049937	0.504	K0	0
Pla2g4a	5	chr1:149902294-149902442	-	CE	0.95717	0.93693	0.020238	0.58	K0	0
Pla2g4a	6	chr1:149901100-149901213	-	CE	0.95634	0.91425	0.042086	0.667	K0	0
Pla2g4a	7	chr1:149887607-149887644	-	CE	0.9409	0.89447	0.046427	0.615	K0	0
Pla2g4a	8	chr1:149886147-149886288	-	CE	0.95841	0.92214	0.036273	0.643	K0	0
Pla2g4a	9	chr1:149879990-149880126	-	CE	0.94491	0.93494	0.0099653	0.552	K0	0
Pla2g4a	10	chr1:149872538-149872760	-	CE	0.9523	0.93414	0.018161	0.568	K0	0
Pla2g4a	11	chr1:149871401-149871515	-	CE	0.96655	0.92695	0.0396	0.683	K0	0
Pla2g4a	12	chr1:149865116-149865253	-	CE	0.93532	0.90818	0.027138	0.615	K0	0
Pla2g4a	13	chr1:149864911-149865003	-	CE	0.94542	0.90505	0.040369	0.645	K0	0
Pla2g4a	14	chr1:149861055-149861126	-	CE	0.94486	0.90124	0.043622	0.606	K0	0
Pla2g4a	15	chr1:149857445-149857684	-	CE	0.92208	0.90428	0.017801	0.536	K0	0
Pla2g4a	16	chr1:149851267-149851451	-	CE	0.93675	0.93598	0.00077648	0.511	K0	0
Pla2g4a	17	chr1:149842164-149842359	-	CE	0.94594	0.92193	0.024004	0.608	K0	0
Pla2g4a	18	chr1:149840618-149840775	-	CE	0.96741	0.93694	0.030468	0.667	K0	0
Pla2g4a	19	chr1:149829636-149830192	-	TE	0.02061	0.34718	-0.32657	0.504	K1	0
Pla2g4a	20	chr1:149829618-149829635	-	TE	0.97942	0.65311	0.3263	0.511	K1	0
Ppp1r7	2	chr1:93346156-93346287	+	CE	0.99597	0.9932	0.002776	0.634	K0	0
Ppp1r7	3	chr1:93350325-93350380	+	CE	0.99594	0.99338	0.0025624	0.581	K0	0
Ppp1r7	4	chr1:93350949-93351014	+	CE	0.99538	0.99201	0.0033726	0.623	K0	0
Ppp1r7	5	chr1:93351326-93351505	+	AA	0.12299	0.15057	-0.027574	0.654	K1	0.6309
Ppp1r7	6	chr1:93351506-93351636	+	CE	0.9966	0.99493	0.001671	0.61	K0	0
Ppp1r7	7	chr1:93352517-93352679	+	CE	0.99693	0.99458	0.0023496	0.635	K0	0
Ppp1r7	8	chr1:93354329-93354445	+	CE	0.97839	0.98178	-0.003391	0.637	K1	0.1627
Ppp1r7	9	chr1:93357757-93357861	+	CE	0.99565	0.99308	0.0025694	0.606	K0	0
Ppp1r7	10	chr1:93360726-93360812	+	CE	0.99457	0.99124	0.0033319	0.585	K0	0
Dcaf8	1	chr1:172148118-172148141	+	TS	0.016756	0.022011	-0.0052545	0.568	K1	0
Dcaf8	2	chr1:172148142-172148168	+	TS	0.98263	0.97827	0.0043565	0.542	K1	0
Dcaf8	5	chr1:172148339-172149121	+	AD	0.13118	0.15124	-0.020061	0.615	K4	1.4927
Dcaf8	6	chr1:172149122-172149209	+	RI	0.0875	0.11818	-0.030682	0.731	K4	1.4927
Dcaf8	7	chr1:172149210-172149248	+	AA	0.092139	0.13045	-0.038313	0.713	K4	1.4927
Dcaf8	8	chr1:172149249-172149321	+	CE	0.96893	0.99728	-0.028352	0.925	K4	1.3227
Dcaf8	9	chr1:172149322-172150138	+	AD	0.022242	0.02944	-0.0071981	0.644	K3	1.3521
Dcaf8	10	chr1:172165848-172165918	+	CE	0.9982	0.99792	0.00027828	0.521	K0	0
Dcaf8	11	chr1:172172329-172172981	+	CE	0.9983	0.99803	0.00027643	0.58	K0	0
Dcaf8	12	chr1:172172982-172173292	+	AD	0.12609	0.23768	-0.11159	0.904	K1	0.927
Dcaf8	13	chr1:172173943-172174083	+	CE	0.99789	0.99747	0.00041828	0.521	K0	0
Dcaf8	14	chr1:172175483-172175577	+	CE	0.99822	0.99817	4.4457e-05	0.509	K0	0
Dcaf8	15	chr1:172175578-172175610	+	AD	0.023354	0.024874	-0.0015193	0.537	K1	0.191
Dcaf8	16	chr1:172179907-172180017	+	CE	0.99829	0.99832	-3.8329e-05	0.525	K0	0
Dcaf8	17	chr1:172186296-172186368	+	CE	0.9982	0.99817	2.6504e-05	0.51	K0	0
Dcaf8	18	chr1:172186855-172186912	+	CE	0.98245	0.96495	0.017499	0.786	K1	0.3167
Dcaf8	19	chr1:172187353-172187460	+	CE	0.9975	0.99678	0.00072043	0.575	K0	0
Dcaf8	20	chr1:172188939-172189069	+	CE	0.99307	0.997	-0.003937	0.738	K2	0.524
Dcaf8	21	chr1:172189070-172191079	+	AD	0.12913	0.10932	0.019814	0.615	K2	0.6266
Dcaf8	22	chr1:172192518-172192637	+	CE	0.99804	0.99756	0.00047914	0.567	K0	0
Dcaf8	23	chr1:172193785-172193901	+	CE	0.99795	0.99771	0.00023755	0.508	K0	0
Dcaf8	24	chr1:172194556-172195466	+	TE	0.30373	0.33512	-0.031389	0.616	K2	1.3138
Dcaf8	25	chr1:172195467-172195507	+	TE	0.10846	0.013011	0.095447	0.975	K2	1.3138
Dcaf8	26	chr1:172195508-172196389	+	TE	0.58807	0.65254	-0.064468	0.828	K2	1.3138
Angel2	3	chr1:190928492-190928717	+	AF	0.98239	0.97594	0.0064546	0.584	K0	0
Angel2	4	chr1:190928718-190928758	+	AD	0.99073	0.96858	0.022159	0.779	K2	1.0273
Angel2	5	chr1:190928759-190928904	+	AD	0.13524	0.23248	-0.097246	0.748	K3	1.9943
Angel2	6	chr1:190928905-190929099	+	AD	0.10908	0.071542	0.037541	0.771	K4	1.6617
Angel2	7	chr1:190929100-190929246	+	AD	0.059303	0.14459	-0.085292	0.745	K4	1.9881
Angel2	8	chr1:190932867-190933192	+	CE	0.83751	0.89137	-0.05386	0.869	K4	1.6617
Angel2	9	chr1:190933193-190934994	+	AD	0.039733	0.061525	-0.021792	0.769	K4	2.1051
Angel2	10	chr1:190937444-190937700	+	CE	0.99731	0.9968	0.00051301	0.539	K0	0
Angel2	11	chr1:190939087-190939156	+	CE	0.99629	0.98575	0.010532	0.691	K1	0.1858
Angel2	12	chr1:190939157-190939163	+	AD	0.012248	0.016178	-0.0039304	0.566	K0	0
Angel2	13	chr1:190940874-190941295	+	CE	0.99377	0.99244	0.0013265	0.523	K0	0
Angel2	14	chr1:190942121-190942247	+	CE	0.91254	0.90425	0.0082886	0.562	K1	0.5686
Angel2	15	chr1:190942830-190942887	+	CE	0.99453	0.99422	0.00030872	0.52	K0	0
Angel2	16	chr1:190942888-190943651	+	AD	0.021087	0.052635	-0.031548	0.767	K1	0.4483
Angel2	17	chr1:190943777-190943940	+	CE	0.99606	0.99524	0.00082355	0.541	K0	0
Inpp5d	1	chr1:87620312-87620361	+	TS	0.0038833	0.0052215	-0.0013381	0.562	K2	0.4966
Inpp5d	2	chr1:87620362-87620398	+	TS	0.98791	0.94844	0.039472	0.833	K2	0.4966
Inpp5d	3	chr1:87620399-87620631	+	TS	0.012604	0.051569	-0.038965	0.799	K2	0.4966
Inpp5d	4	chr1:87635292-87635355	+	CE	0.99432	0.99313	0.0011904	0.571	K0	0
Inpp5d	5	chr1:87635356-87641349	+	AD	0.25292	0.37745	-0.12453	0.817	K1	0.9916
Inpp5d	6	chr1:87665387-87665537	+	CE	0.98996	0.98461	0.0053524	0.616	K0	0
Inpp5d	7	chr1:87667889-87667891	+	AA	0.67019	0.66633	0.0038654	0.507	K1	0.9967
Inpp5d	8	chr1:87667892-87668063	+	CE	0.99488	0.99329	0.0015836	0.585	K0	0
Inpp5d	9	chr1:87669642-87669782	+	CE	0.99544	0.99429	0.0011508	0.565	K0	0
Inpp5d	11	chr1:87676283-87676370	+	CE	0.99371	0.98375	0.0099657	0.617	K2	0.2136
Inpp5d	12	chr1:87681489-87681569	+	CE	0.99725	0.99585	0.0014057	0.584	K0	0
Inpp5d	13	chr1:87681687-87681758	+	CE	0.9978	0.99682	0.00097593	0.616	K0	0
Inpp5d	14	chr1:87683743-87683866	+	CE	0.99803	0.99678	0.0012499	0.622	K0	0
Inpp5d	15	chr1:87691625-87691731	+	CE	0.99768	0.99577	0.0019102	0.612	K0	0
Inpp5d	16	chr1:87695333-87695435	+	CE	0.99729	0.99509	0.0021932	0.624	K0	0
Inpp5d	17	chr1:87697349-87697395	+	AA	0.90507	0.92762	-0.02255	0.768	K1	0.4759
Inpp5d	18	chr1:87697396-87697545	+	CE	0.99726	0.99571	0.0015533	0.609	K0	0
Inpp5d	19	chr1:87698113-87698230	+	CE	0.99723	0.99552	0.001714	0.612	K0	0
Inpp5d	20	chr1:87699028-87699124	+	CE	0.99714	0.99535	0.0017873	0.629	K0	0
Inpp5d	21	chr1:87699640-87699778	+	CE	0.99682	0.99514	0.0016871	0.585	K0	0
Inpp5d	22	chr1:87701160-87701268	+	CE	0.99735	0.99616	0.0011886	0.603	K0	0
Inpp5d	23	chr1:87701415-87701503	+	CE	0.99714	0.99572	0.0014196	0.617	K0	0
Inpp5d	24	chr1:87703118-87703199	+	CE	0.99701	0.99498	0.0020355	0.629	K0	0
Inpp5d	25	chr1:87705934-87706023	+	CE	0.99671	0.99499	0.0017132	0.594	K0	0
Inpp5d	26	chr1:87707864-87708080	+	AA	0.040888	0.069645	-0.028756	0.729	K2	0.5781
Inpp5d	27	chr1:87708081-87708095	+	AA	0.084732	0.096601	-0.011869	0.634	K2	0.5781
Inpp5d	28	chr1:87708096-87708209	+	CE	0.99747	0.99295	0.0045267	0.755	K2	0.5036
Inpp5d	29	chr1:87709618-87709700	+	CE	0.99779	0.99597	0.0018169	0.641	K0	0
Inpp5d	30	chr1:87711065-87711152	+	CE	0.99781	0.99283	0.0049804	0.765	K1	0.0833
Inpp5d	31	chr1:87712031-87712180	+	CE	0.99774	0.99691	0.00082579	0.588	K0	0
Inpp5d	32	chr1:87713193-87713289	+	CE	0.99733	0.99652	0.00081005	0.535	K0	0
Inpp5d	33	chr1:87715038-87715093	+	CE	0.99601	0.99433	0.0016837	0.578	K0	0
Inpp5d	34	chr1:87715094-87715276	+	RI	0.83059	0.76795	0.062642	0.813	K1	0.8297
Inpp5d	35	chr1:87715277-87715313	+	CE	0.99463	0.99204	0.0025841	0.584	K0	0
Inpp5d	36	chr1:87717690-87718284	+	CE	0.99646	0.99456	0.0019072	0.607	K0	0
Inpp5d	37	chr1:87719321-87719694	+	TE	0.03167	0.097842	-0.066172	0.928	K2	1.2407
Inpp5d	38	chr1:87719695-87720502	+	TE	0.77335	0.71301	0.060346	0.896	K2	1.2407
Inpp5d	39	chr1:87720503-87720503	+	TE	0.19531	0.18918	0.0061341	0.638	K2	1.2407
Inpp5d	40	chr1:87720504-87720507	+	TE	0.0017795	0.0021019	-0.0003224	0.54	K2	1.2407
Tmem237	4	chr1:59119703-59119806	-	AF	0.70715	0.78959	-0.08244	0.697	K2	1.018
Tmem237	5	chr1:59117975-59118006	-	CE	0.90284	0.84652	0.056322	0.619	K1	0.7902
Tmem237	6	chr1:59117331-59117341	-	CE	0.87276	0.78188	0.090879	0.597	K2	1.4284
Tmem237	8	chr1:59115873-59115929	-	CE	0.94649	0.87993	0.066565	0.759	K2	1.4284
Tmem237	9	chr1:59114081-59114218	-	CE	0.96903	0.93901	0.030016	0.624	K0	0
Tmem237	10	chr1:59109988-59110105	-	CE	0.97389	0.95504	0.018848	0.602	K0	0
Tmem237	11	chr1:59109039-59109196	-	CE	0.96577	0.95541	0.010359	0.541	K0	0
Tmem237	12	chr1:59108675-59108798	-	CE	0.92933	0.93129	-0.001958	0.521	K0	0
Tmem237	13	chr1:59108038-59108229	-	CE	0.95166	0.91944	0.032217	0.6	K0	0
Tmem237	14	chr1:59107454-59107527	-	CE	0.97275	0.9398	0.032951	0.663	K0	0
Tmem237	15	chr1:59106544-59106634	-	CE	0.97084	0.95208	0.018762	0.592	K0	0
Tmem237	16	chr1:59105546-59105667	-	CE	0.95709	0.9291	0.027996	0.578	K0	0
Tmem237	17	chr1:59100911-59101198	-	TE	0.48362	0.41157	0.07205	0.645	K2	0.958
Tmem237	18	chr1:59100597-59100910	-	TE	0.021005	0.026735	-0.0057295	0.555	K2	0.958
Tmem237	19	chr1:59100590-59100596	-	TE	0.51482	0.58692	-0.072101	0.601	K2	0.958
Gorab	2	chr1:163396812-163397169	-	CE	0.95851	0.90971	0.048797	0.677	K0	0
Gorab	3	chr1:163396808-163396811	-	AD	0.20942	0.42396	-0.21454	0.797	K1	0.9656
Gorab	4	chr1:163394591-163394692	-	CE	0.96762	0.95228	0.015338	0.595	K0	0
Gorab	5	chr1:163392410-163392550	-	CE	0.97054	0.94675	0.023796	0.605	K0	0
Atic	2	chr1:71557497-71557623	+	CE	0.9975	0.99603	0.0014672	0.608	K0	0
Atic	3	chr1:71557624-71558979	+	AD	0.057462	0.051224	0.0062376	0.643	K1	0.3606
Atic	4	chr1:71559226-71559302	+	CE	0.99722	0.99624	0.00097872	0.571	K0	0
Atic	5	chr1:71560889-71560955	+	CE	0.99711	0.99597	0.0011464	0.56	K0	0
Atic	6	chr1:71563759-71563847	+	CE	0.99726	0.99585	0.0014073	0.59	K0	0
Atic	7	chr1:71564406-71564557	+	CE	0.99773	0.99667	0.0010588	0.567	K0	0
Atic	8	chr1:71564811-71564967	+	CE	0.99811	0.99713	0.00098519	0.577	K0	0
Atic	9	chr1:71567814-71567939	+	CE	0.99792	0.99641	0.0015155	0.575	K0	0
Atic	10	chr1:71568963-71569070	+	CE	0.99731	0.99613	0.0011763	0.569	K0	0
Atic	11	chr1:71569840-71569925	+	CE	0.99831	0.99741	0.00090498	0.607	K0	0
Atic	12	chr1:71570840-71570929	+	CE	0.99862	0.99785	0.00077213	0.605	K0	0
Atic	13	chr1:71572908-71573036	+	CE	0.99831	0.99741	0.00090002	0.57	K0	0
Atic	14	chr1:71576041-71576133	+	CE	0.99808	0.9974	0.00067891	0.567	K0	0
Atic	15	chr1:71576617-71576799	+	CE	0.99813	0.99747	0.00066355	0.621	K0	0
Atic	16	chr1:71577786-71577941	+	CE	0.9981	0.99707	0.001035	0.575	K0	0
Rabif	2	chr1:134501167-134501221	+	CE	0.040455	0.088922	-0.048467	0.858	K2	0.6889
Rabif	3	chr1:134503074-134503174	+	CE	0.031543	0.035641	-0.0040979	0.536	K2	0.6889
Paqr8	6	chr1:20934582-20935749	+	TE	0.0074408	0.0061955	0.0012453	0.539	K2	1
Paqr8	7	chr1:20935750-20935756	+	TE	0.032553	0.0063752	0.026178	0.863	K2	1
Paqr8	8	chr1:20935757-20939055	+	TE	0.6581	0.43047	0.22763	0.709	K2	1
Paqr8	9	chr1:20939056-20939650	+	TE	0.31863	0.56914	-0.25052	0.705	K2	1
Cops5	2	chr1:10037670-10037918	-	AD	0.94543	0.95943	-0.013997	0.729	K1	0.3419
Cops5	3	chr1:10037662-10037669	-	AD	0.0056593	0.0070219	-0.0013625	0.565	K0	0
Cops5	4	chr1:10034929-10035163	-	CE	0.99669	0.99559	0.0011031	0.56	K0	0
Cops5	5	chr1:10034008-10034136	-	CE	0.99598	0.99452	0.0014625	0.566	K0	0
Cops5	6	chr1:10033258-10033323	-	CE	0.99615	0.99463	0.0015241	0.534	K0	0
Cops5	7	chr1:10032339-10032424	-	CE	0.99747	0.99606	0.0014129	0.6	K0	0
Cops5	8	chr1:10030599-10030710	-	CE	0.99816	0.99758	0.00057478	0.56	K0	0
Cops5	9	chr1:10027103-10027251	-	CE	0.99807	0.99741	0.00066482	0.573	K0	0
Ephx1	2	chr1:181001799-181001986	-	CE	0.98402	0.9907	-0.0066806	0.689	K1	0.095
Ephx1	3	chr1:180999723-180999903	-	CE	0.98644	0.99216	-0.0057233	0.722	K1	0.095
Ephx1	4	chr1:180995949-180996176	-	CE	0.98595	0.99242	-0.0064673	0.713	K1	0.095
Ephx1	5	chr1:180994628-180994757	-	CE	0.98912	0.9886	0.0005208	0.507	K0	0
Ephx1	6	chr1:180994046-180994087	-	AA	0.95932	0.95942	-9.7494e-05	0.506	K2	0.3827
Ephx1	7	chr1:180993879-180994045	-	CE	0.9716	0.97742	-0.0058182	0.598	K2	0.3827
Ephx1	8	chr1:180991933-180992041	-	CE	0.97238	0.97746	-0.0050767	0.605	K2	0.3827
Ephx1	9	chr1:180990393-180990518	-	CE	0.99108	0.98924	0.0018409	0.509	K0	0
Tuba4a	2	chr1:75217212-75217434	-	CE	0.99798	0.99816	-0.00018769	0.538	K0	0
Tuba4a	3	chr1:75216827-75216975	-	CE	0.99712	0.99766	-0.00053485	0.533	K0	0
Tuba4a	4	chr1:75216449-75216593	-	AA	0.97462	0.98778	-0.013163	0.718	K1	0.2598
Pyhin1	2	chr1:173637286-173637567	+	CE	0.9863	0.99674	-0.010443	0.866	K1	0.1455
Pyhin1	3	chr1:173638866-173639002	+	CE	0.99655	0.99588	0.00067231	0.535	K0	0
Pyhin1	4	chr1:173641005-173641244	+	CE	0.99546	0.99418	0.0012789	0.549	K0	0
Pyhin1	5	chr1:173641337-173642486	+	AA	0.40826	0.44398	-0.035725	0.57	K1	0.9994
Pyhin1	6	chr1:173642487-173642900	+	CE	0.9977	0.99734	0.0003646	0.529	K0	0
Pyhin1	7	chr1:173644648-173644836	+	CE	0.9979	0.99768	0.00021721	0.534	K0	0
Ufc1	3	chr1:171294828-171294920	-	RI	0.039169	0.17346	-0.13429	0.708	K1	0.9768
Ufc1	4	chr1:171294634-171294827	-	CE	0.99545	0.99327	0.0021783	0.55	K0	0
Ufc1	5	chr1:171290149-171290216	-	CE	0.99762	0.99646	0.0011606	0.551	K0	0
Ufc1	6	chr1:171289884-171289947	-	CE	0.99804	0.99777	0.00026614	0.5	K0	0
Ufc1	7	chr1:171289855-171289883	-	AD	0.030068	0.042067	-0.012	0.733	K1	0.2582
Ufc1	8	chr1:171289518-171289594	-	CE	0.99833	0.9981	0.00023116	0.532	K0	0
Ufc1	9	chr1:171289171-171289261	-	CE	0.98605	0.99735	-0.011296	0.858	K1	0.1635
Ufc1	10	chr1:171288712-171288971	-	TE	0.0012539	0.0015804	-0.00032655	0.535	K1	0
Ufc1	11	chr1:171288563-171288711	-	TE	0.99878	0.9984	0.00038576	0.51	K1	0
Pikfyve	1	chr1:65186702-65186749	+	TS	0.024022	0.026183	-0.0021612	0.518	K1	0
Pikfyve	2	chr1:65186750-65186778	+	TS	0.97588	0.97426	0.0016195	0.515	K1	0
Pikfyve	3	chr1:65186779-65186833	+	AD	0.63995	0.79346	-0.15351	0.914	K1	0.9495
Pikfyve	4	chr1:65190319-65190499	+	CE	0.98193	0.98271	-0.00078723	0.518	K0	0
Pikfyve	5	chr1:65192145-65192294	+	CE	0.9865	0.98542	0.0010805	0.502	K0	0
Pikfyve	6	chr1:65192531-65192533	+	AA	0.025219	0.080578	-0.055359	0.786	K2	0.8038
Pikfyve	7	chr1:65192534-65192566	+	CE	0.08134	0.15464	-0.073298	0.829	K2	0.8038
Pikfyve	8	chr1:65195656-65195774	+	CE	0.98956	0.98661	0.0029487	0.526	K0	0
Pikfyve	9	chr1:65196612-65196783	+	CE	0.99075	0.98912	0.0016348	0.517	K0	0
Pikfyve	10	chr1:65202716-65202923	+	CE	0.98968	0.99052	-0.00084007	0.561	K0	0
Pikfyve	11	chr1:65202924-65203657	+	AD	0.072053	0.14888	-0.076827	0.79	K1	0.7213
Pikfyve	12	chr1:65205589-65205678	+	CE	0.98909	0.99034	-0.0012473	0.526	K0	0
Pikfyve	13	chr1:65215934-65216072	+	CE	0.98919	0.98975	-0.00056175	0.509	K0	0
Pikfyve	14	chr1:65216073-65216110	+	AD	0.064552	0.04176	0.022792	0.706	K1	0.3562
Pikfyve	15	chr1:65219754-65219911	+	CE	0.99051	0.99063	-0.00011475	0.505	K0	0
Pikfyve	16	chr1:65222270-65222381	+	CE	0.98941	0.98874	0.00066547	0.54	K0	0
Pikfyve	17	chr1:65223505-65223634	+	CE	0.98698	0.98287	0.0041077	0.539	K0	0
Pikfyve	18	chr1:65223635-65223652	+	AD	0.92738	0.9632	-0.035817	0.788	K2	1.3045
Pikfyve	19	chr1:65224162-65224329	+	CE	0.45673	0.5173	-0.060568	0.685	K2	1.3045
Pikfyve	20	chr1:65230794-65230853	+	CE	0.98735	0.98867	-0.0013224	0.505	K0	0
Pikfyve	21	chr1:65233730-65233859	+	CE	0.99072	0.9884	0.0023218	0.564	K0	0
Pikfyve	22	chr1:65234254-65234434	+	CE	0.98912	0.98516	0.0039666	0.565	K0	0
Pikfyve	23	chr1:65235010-65235084	+	CE	0.98731	0.98533	0.0019759	0.541	K0	0
Pikfyve	24	chr1:65238435-65238542	+	CE	0.9757	0.94901	0.026689	0.756	K1	0.3723
Pikfyve	25	chr1:65244396-65244536	+	CE	0.98715	0.98783	-0.00068101	0.511	K0	0
Pikfyve	26	chr1:65245710-65245836	+	CE	0.98604	0.98519	0.00085135	0.533	K0	0
Pikfyve	27	chr1:65246062-65247218	+	CE	0.98332	0.98764	-0.0043216	0.577	K0	0
Pikfyve	28	chr1:65250186-65250286	+	CE	0.98308	0.98628	-0.003199	0.56	K0	0
Pikfyve	29	chr1:65251605-65251676	+	CE	0.9869	0.98729	-0.00038828	0.53	K0	0
Pikfyve	30	chr1:65252412-65252583	+	CE	0.98794	0.98833	-0.00038681	0.517	K0	0
Pikfyve	31	chr1:65253352-65253530	+	CE	0.98702	0.98797	-0.00094861	0.539	K0	0
Pikfyve	32	chr1:65255042-65255155	+	CE	0.98498	0.98709	-0.0021094	0.552	K0	0
Pikfyve	33	chr1:65255522-65255630	+	CE	0.98742	0.98873	-0.001316	0.521	K0	0
Pikfyve	34	chr1:65255939-65256093	+	CE	0.98791	0.98862	-0.00071337	0.515	K0	0
Pikfyve	35	chr1:65256548-65256638	+	CE	0.98461	0.98499	-0.00038309	0.514	K0	0
Pikfyve	36	chr1:65257909-65257969	+	CE	0.98472	0.98388	0.00083881	0.503	K0	0
Pikfyve	37	chr1:65258783-65258920	+	CE	0.98034	0.97995	0.00038264	0.516	K0	0
Pikfyve	38	chr1:65259999-65260119	+	CE	0.98299	0.98003	0.0029666	0.519	K0	0
Pikfyve	39	chr1:65262880-65262975	+	CE	0.98302	0.97708	0.0059369	0.557	K0	0
Pikfyve	40	chr1:65264347-65264430	+	CE	0.98316	0.97901	0.0041578	0.528	K0	0
Pikfyve	41	chr1:65265249-65265346	+	CE	0.98515	0.98566	-0.0005103	0.53	K0	0
Pikfyve	42	chr1:65265762-65265926	+	CE	0.98917	0.98861	0.00055964	0.516	K0	0
Pikfyve	43	chr1:65267826-65267885	+	CE	0.99224	0.98168	0.010557	0.742	K1	0.1775
Pikfyve	44	chr1:65268698-65268874	+	CE	0.93855	0.97837	-0.03982	0.873	K1	0.3847
Pikfyve	45	chr1:65269873-65269976	+	CE	0.9863	0.98316	0.0031388	0.542	K0	0
Pikfyve	46	chr1:65271268-65271396	+	CE	0.99126	0.9906	0.00066071	0.5	K0	0
Pikfyve	47	chr1:65272447-65272708	+	CE	0.99246	0.99219	0.00027438	0.509	K0	0
Pikfyve	48	chr1:65273033-65273107	+	CE	0.9904	0.99068	-0.0002852	0.517	K0	0
Pikfyve	49	chr1:65273643-65274012	+	TE	0.47585	0.50225	-0.026403	0.857	K1	1
Pikfyve	50	chr1:65274013-65278695	+	TE	0.52365	0.49802	0.025634	0.814	K1	1
Eef1b2	1	chr1:63176825-63177129	+	TS	0.9859	0.98967	-0.0037643	0.808	K1	0.1125
Eef1b2	2	chr1:63177130-63177291	+	TS	0.014155	0.010314	0.0038413	0.819	K1	0.1125
Eef1b2	3	chr1:63177292-63177511	+	AD	0.0060436	0.0058484	0.0001952	0.551	K2	0.1354
Eef1b2	4	chr1:63177723-63177753	+	AA	0.0062904	0.0071863	-0.00089591	0.623	K2	0.1007
Eef1b2	5	chr1:63177754-63177876	+	CE	0.99921	0.99831	0.00090043	0.797	K2	0.1007
Eef1b2	6	chr1:63178439-63178565	+	CE	0.99977	0.99969	7.7834e-05	0.576	K0	0
Eef1b2	7	chr1:63178832-63178898	+	CE	0.99975	0.99967	8.0926e-05	0.529	K0	0
Eef1b2	8	chr1:63179248-63179373	+	CE	0.99925	0.99967	-0.00042817	0.738	K1	0.0072
Eef1b2	9	chr1:63179458-63179656	+	TE	0.99447	0.9935	0.00097547	0.655	K1	0.0629
Eef1b2	10	chr1:63179657-63180486	+	TE	0.0054768	0.0065945	-0.0011177	0.694	K1	0.0629
Pogk	1	chr1:166409829-166409863	-	TS	0.91359	0.84856	0.065034	0.723	K2	0.5954
Pogk	2	chr1:166409783-166409828	-	TS	0.086813	0.1423	-0.05549	0.68	K2	0.5954
Pogk	3	chr1:166409707-166409782	-	TS	0.060463	0.070482	-0.01002	0.549	K2	0.5954
Pogk	7	chr1:166408998-166409134	-	AD	0.88462	0.84382	0.040798	0.626	K2	1.2518
Pogk	8	chr1:166408399-166408532	-	CE	0.97124	0.95647	0.014772	0.611	K0	0
Pogk	9	chr1:166403498-166403624	-	CE	0.96619	0.95104	0.015147	0.589	K0	0
Pogk	11	chr1:166401866-166401964	-	CE	0.9509	0.93895	0.011957	0.53	K0	0
Pogk	12	chr1:166398690-166400165	-	CE	0.95764	0.95926	-0.0016214	0.501	K0	0
Pogk	13	chr1:166396169-166398689	-	TE	0.0005972	0.00061265	-1.545e-05	0.502	K2	0
Pogk	14	chr1:166393614-166396168	-	TE	0.00059459	0.00063349	-3.8901e-05	0.542	K2	0
Pogk	15	chr1:166392228-166393613	-	TE	0.99941	0.99937	4.0837e-05	0.504	K2	0
Gm16152	4	chr1:38389565-38389680	+	CE	0.88824	0.89302	-0.0047734	0.501	K0	0
Ino80d	2	chr1:63114211-63114267	-	AF	0.92627	0.89252	0.03375	0.591	K4	2.04
Ino80d	3	chr1:63113814-63114210	-	AD	0.54872	0.5446	0.0041211	0.524	K4	2.04
Ino80d	4	chr1:63113549-63113813	-	AD	0.23773	0.3314	-0.093674	0.76	K4	2.04
Ino80d	5	chr1:63110709-63113548	-	AD	0.18512	0.16545	0.019671	0.509	K4	2.04
Ino80d	6	chr1:63105656-63105759	-	CE	0.91302	0.97619	-0.063172	0.816	K5	3.0499
Ino80d	7	chr1:63098142-63098183	-	CE	0.03638	0.02511	0.01127	0.623	K5	3.0499
Ino80d	8	chr1:63093640-63093730	-	CE	0.95311	0.98786	-0.034751	0.916	K5	3.0499
Ino80d	9	chr1:63093441-63093531	-	AA	0.59067	0.6399	-0.049233	0.753	K3	1.2879
Ino80d	10	chr1:63093285-63093440	-	CE	0.97492	0.9915	-0.016572	0.769	K3	1.2879
Ino80d	11	chr1:63085668-63086398	-	CE	0.97984	0.9818	-0.0019552	0.515	K1	0.1903
Ino80d	12	chr1:63078953-63079061	-	CE	0.99173	0.99142	0.00031289	0.517	K0	0
Ino80d	13	chr1:63074322-63074546	-	CE	0.97351	0.98781	-0.014304	0.716	K1	0.1843
Ino80d	14	chr1:63068184-63068293	-	CE	0.97933	0.97686	0.002471	0.512	K0	0
Ino80d	15	chr1:63065815-63065837	-	AA	0.92964	0.9748	-0.045157	0.767	K1	0.4828
Ino80d	16	chr1:63065704-63065814	-	CE	0.98392	0.98197	0.0019482	0.522	K0	0
Ino80d	17	chr1:63062036-63062253	-	CE	0.98645	0.98712	-0.00067331	0.511	K0	0
Ino80d	18	chr1:63061040-63061197	-	CE	0.98767	0.98822	-0.00055363	0.507	K0	0
Per2	3	chr1:91449813-91449878	-	CE	0.89744	0.90105	-0.0036095	0.509	K0	0
Per2	4	chr1:91448708-91448862	-	CE	0.89488	0.9072	-0.012321	0.516	K0	0
Per2	13	chr1:91433396-91433521	-	CE	0.86595	0.89149	-0.025533	0.562	K0	0
Rab23	3	chr1:33721608-33721699	+	CE	0.91976	0.87673	0.043031	0.61	K0	0
Rab23	4	chr1:33723786-33724005	+	CE	0.91634	0.90888	0.0074605	0.55	K0	0
Rab23	5	chr1:33724934-33725019	+	CE	0.90356	0.86222	0.04134	0.622	K0	0
Rab23	6	chr1:33734702-33734858	+	CE	0.92205	0.89471	0.027346	0.583	K0	0
Rab23	7	chr1:33736800-33736882	+	CE	0.90676	0.89333	0.013435	0.534	K0	0
Rab23	8	chr1:33738288-33738380	+	CE	0.91892	0.9163	0.0026206	0.514	K0	0
Rab23	9	chr1:33739253-33742561	+	TE	0.79402	0.78931	0.0047081	0.509	K1	0.7247
Rab23	10	chr1:33742562-33742564	+	TE	0.20357	0.21029	-0.0067151	0.522	K1	0.7247
Sdhc	3	chr1:171150480-171150558	-	AD	0.0022082	0.0036971	-0.0014889	0.575	K0	0
Sdhc	4	chr1:171145756-171145812	-	CE	0.98297	0.98504	-0.0020776	0.601	K1	0.2353
Sdhc	5	chr1:171143558-171143659	-	CE	0.99805	0.99737	0.00068931	0.577	K0	0
Sdhc	6	chr1:171138694-171138755	-	CE	0.99845	0.99772	0.00073646	0.567	K0	0
Sdhc	7	chr1:171135993-171136156	-	CE	0.99823	0.9971	0.0011288	0.599	K0	0
Sdhc	8	chr1:171129407-171129905	-	TE	0.78612	0.7746	0.011516	0.677	K1	0.7988
Sdhc	9	chr1:171127165-171129406	-	TE	0.21409	0.22585	-0.011751	0.628	K1	0.7988
Mgat5	2	chr1:127249790-127249839	+	CE	0.97843	0.9751	0.0033337	0.533	K3	1.5876
Mgat5	3	chr1:127272807-127272863	+	CE	0.17004	0.14644	0.023601	0.668	K3	1.5876
Mgat5	4	chr1:127306634-127306636	+	AA	0.76687	0.76869	-0.0018212	0.529	K3	1.6337
Mgat5	7	chr1:127320604-127320765	+	CE	0.9947	0.99256	0.0021473	0.549	K0	0
Mgat5	8	chr1:127321092-127321285	+	CE	0.30344	0.20362	0.09982	0.811	K2	0.9623
Mgat5	9	chr1:127321286-127363946	+	AD	0.25961	0.18066	0.078946	0.833	K2	0.9737
Mgat5	10	chr1:127365148-127365224	+	CE	0.99239	0.98826	0.0041282	0.605	K0	0
Mgat5	11	chr1:127366403-127366492	+	CE	0.99432	0.99074	0.0035802	0.605	K0	0
Mgat5	12	chr1:127382921-127382992	+	CE	0.99628	0.99454	0.0017395	0.577	K0	0
Mgat5	13	chr1:127384768-127384929	+	CE	0.99724	0.99577	0.0014687	0.636	K0	0
Mgat5	14	chr1:127387343-127387512	+	CE	0.99772	0.99622	0.0014939	0.621	K0	0
Mgat5	15	chr1:127390744-127390878	+	CE	0.99725	0.99539	0.0018571	0.609	K0	0
Mgat5	16	chr1:127397507-127397640	+	CE	0.99579	0.97325	0.022546	0.948	K1	0.2111
Mgat5	17	chr1:127412127-127412260	+	CE	0.99667	0.99463	0.0020444	0.589	K0	0
Mgat5	18	chr1:127412261-127414589	+	AD	0.12468	0.13346	-0.0087806	0.502	K1	0.7594
Mgat5	19	chr1:127446242-127446391	+	CE	0.99589	0.99328	0.0026114	0.594	K0	0
Mgat5	20	chr1:127459836-127459982	+	CE	0.99511	0.99208	0.0030343	0.601	K0	0
Mgat5	21	chr1:127469192-127469308	+	CE	0.99554	0.99178	0.0037575	0.641	K0	0
Mgat5	22	chr1:127471501-127471575	+	CE	0.99442	0.98943	0.0049926	0.681	K0	0
Mgat5	23	chr1:127479465-127479622	+	CE	0.99445	0.99001	0.0044447	0.613	K0	0
Mgat5	24	chr1:127482527-127483704	+	TE	0.00019497	0.00031789	-0.00012292	0.6	K1	0
Mgat5	25	chr1:127483705-127488336	+	TE	0.9998	0.99969	0.00010368	0.6	K1	0
Dis3l2	1	chr1:86703819-86703842	+	TS	0.058008	0.064157	-0.0061491	0.542	K1	0
Dis3l2	2	chr1:86703843-86703871	+	TS	0.94211	0.93603	0.006084	0.541	K1	0
Dis3l2	3	chr1:86744681-86744828	+	CE	0.99211	0.98997	0.0021342	0.561	K0	0
Dis3l2	4	chr1:86745341-86745498	+	CE	0.99201	0.98511	0.0069039	0.695	K1	0.128
Dis3l2	5	chr1:86754227-86754280	+	CE	0.99336	0.99285	0.00051255	0.511	K0	0
Dis3l2	6	chr1:86760288-86760389	+	CE	0.99172	0.98994	0.0017748	0.547	K0	0
Dis3l2	7	chr1:86767130-86767236	+	CE	0.22515	0.30622	-0.081067	0.735	K3	2.6468
Dis3l2	8	chr1:86791416-86791457	+	CE	0.4196	0.2397	0.1799	0.871	K3	2.6468
Dis3l2	9	chr1:86812488-86812511	+	AA	0.10304	0.11222	-0.0091825	0.512	K3	2.6468
Dis3l2	10	chr1:86812512-86812589	+	CE	0.42268	0.56291	-0.14023	0.673	K3	2.6468
Dis3l2	11	chr1:86813655-86821221	+	AA	0.19338	0.21889	-0.025511	0.567	K3	2.3923
Dis3l2	12	chr1:86821222-86821450	+	CE	0.98785	0.98691	0.00094748	0.522	K0	0
Dis3l2	13	chr1:86854360-86854460	+	CE	0.99179	0.99125	0.00054258	0.522	K0	0
Dis3l2	14	chr1:86857127-86857374	+	CE	0.99186	0.99144	0.00042739	0.535	K0	0
Dis3l2	15	chr1:86878403-86878576	+	CE	0.98984	0.9896	0.00024042	0.504	K0	0
Dis3l2	16	chr1:86930754-86930833	+	CE	0.9829	0.98182	0.0010775	0.524	K0	0
Dis3l2	17	chr1:86959743-86959855	+	CE	0.96807	0.96547	0.0026001	0.501	K0	0
Dis3l2	18	chr1:86959856-86967281	+	AD	0.20344	0.35516	-0.15172	0.625	K2	0.9236
Dis3l2	19	chr1:86973400-86973507	+	CE	0.90174	0.95279	-0.051053	0.713	K3	1.116
Dis3l2	20	chr1:86990092-86990325	+	CE	0.9648	0.97726	-0.012463	0.676	K3	1.116
Dis3l2	21	chr1:87021038-87021117	+	CE	0.97873	0.9773	0.0014287	0.509	K0	0
Dis3l2	22	chr1:87044017-87044200	+	CE	0.98047	0.98082	-0.00034658	0.528	K0	0
Dis3l2	23	chr1:87044830-87044916	+	CE	0.97843	0.97894	-0.00051386	0.508	K0	0
Dis3l2	24	chr1:87047037-87047184	+	CE	0.97498	0.97762	-0.0026389	0.53	K0	0
Dis3l2	25	chr1:87047448-87047578	+	CE	0.97823	0.9777	0.00052783	0.518	K0	0
Dis3l2	26	chr1:87047688-87047792	+	CE	0.98207	0.98018	0.0018905	0.516	K0	0
Dis3l2	27	chr1:87048833-87048934	+	CE	0.98608	0.9822	0.0038808	0.537	K0	0
Dis3l2	28	chr1:87049623-87050092	+	TE	0.0073443	0.05307	-0.045725	0.844	K1	0.5441
Dis3l2	29	chr1:87050093-87050095	+	TE	0.99294	0.94718	0.045757	0.85	K1	0.5441
Cspp1	1	chr1:10038217-10038261	+	TS	0.066607	0.0095025	0.057105	0.905	K1	0.5086
Cspp1	2	chr1:10038262-10038344	+	TS	0.93386	0.9908	-0.056941	0.904	K1	0.5086
Cspp1	3	chr1:10039773-10039784	+	TS	0.50676	0.73727	-0.23051	0.791	K1	0.9207
Cspp1	4	chr1:10039785-10039879	+	TS	0.49682	0.26266	0.23416	0.825	K1	0.9207
Cspp1	5	chr1:10039880-10039887	+	AD	0.07507	0.051037	0.024033	0.756	K2	1.2532
Cspp1	6	chr1:10039888-10041465	+	AD	0.020331	0.024891	-0.0045604	0.577	K7	3.8121
Cspp1	7	chr1:10045076-10045184	+	CE	0.994	0.98106	0.012937	0.798	K7	3.8121
Cspp1	8	chr1:10046493-10046555	+	AF	0.013218	0.01804	-0.0048227	0.589	K4	0.9354
Cspp1	9	chr1:10047424-10047526	+	CE	0.9798	0.97881	0.00098278	0.539	K6	2.6123
Cspp1	10	chr1:10058720-10058823	+	CE	0.99409	0.97857	0.015521	0.809	K6	2.5344
Cspp1	11	chr1:10059824-10059847	+	CE	0.074236	0.055976	0.01826	0.678	K6	2.5344
Cspp1	12	chr1:10064333-10064413	+	CE	0.9932	0.97521	0.017987	0.822	K6	2.5344
Cspp1	13	chr1:10065323-10065371	+	CE	0.99161	0.95739	0.034216	0.933	K6	2.5344
Cspp1	14	chr1:10065372-10065421	+	AD	0.94429	0.8706	0.073691	0.878	K6	2.5344
Cspp1	15	chr1:10066426-10066820	+	CE	0.99028	0.98261	0.007673	0.58	K6	2.5344
Cspp1	16	chr1:10066821-10067102	+	TE	0.004077	0.34244	-0.33836	0.992	K2	1.2292
Cspp1	17	chr1:10067103-10067118	+	TE	0.64439	0.19639	0.448	0.929	K2	1.2292
Cspp1	18	chr1:10067119-10067976	+	TE	0.0033713	0.0024954	0.00087587	0.567	K2	1.2292
Cspp1	19	chr1:10067977-10068333	+	TE	0.35408	0.46426	-0.11019	0.812	K2	1.2292
Cspp1	20	chr1:10074860-10074946	+	CE	0.92788	0.94678	-0.018903	0.714	K5	2.17
Cspp1	21	chr1:10077172-10077242	+	CE	0.99246	0.97207	0.020395	0.827	K5	2.17
Cspp1	22	chr1:10082253-10082346	+	CE	0.99346	0.98259	0.010864	0.68	K5	2.17
Cspp1	23	chr1:10082347-10082512	+	AD	0.062874	0.22725	-0.16438	0.98	K6	2.2588
Cspp1	24	chr1:10083501-10083558	+	CE	0.99212	0.97911	0.01301	0.666	K5	1.8025
Cspp1	25	chr1:10085747-10085952	+	CE	0.90359	0.77834	0.12526	0.944	K5	1.8025
Cspp1	26	chr1:10088051-10088184	+	CE	0.98662	0.97641	0.01021	0.581	K5	1.8025
Cspp1	27	chr1:10088882-10088943	+	CE	0.98705	0.97651	0.010545	0.658	K5	1.8025
Cspp1	28	chr1:10088944-10088960	+	AD	0.98441	0.9561	0.028315	0.804	K5	1.8025
Cspp1	29	chr1:10090188-10090317	+	CE	0.98911	0.97649	0.012618	0.639	K5	1.8025
Cspp1	30	chr1:10095866-10096013	+	CE	0.99084	0.97758	0.013265	0.655	K5	1.8025
Cspp1	31	chr1:10104212-10104364	+	CE	0.95831	0.86307	0.095241	0.935	K5	1.8025
Cspp1	32	chr1:10108369-10108481	+	CE	0.99044	0.97095	0.019494	0.764	K7	2.9462
Cspp1	33	chr1:10112393-10112542	+	CE	0.98211	0.85904	0.12307	0.713	K7	2.9462
Cspp1	34	chr1:10112543-10112604	+	AD	0.20572	0.23181	-0.026097	0.595	K1	0.9315
Cspp1	35	chr1:10112876-10112880	+	AA	0.88261	0.85203	0.030578	0.507	K7	2.9462
Cspp1	36	chr1:10112881-10113022	+	CE	0.98365	0.96402	0.019636	0.707	K2	0.6025
Cspp1	37	chr1:10113603-10113707	+	CE	0.98862	0.95976	0.028857	0.846	K2	0.6025
Cspp1	38	chr1:10116018-10116084	+	CE	0.97778	0.92272	0.055054	0.857	K2	0.6025
Cspp1	39	chr1:10116614-10116731	+	CE	0.99079	0.92417	0.066617	0.955	K2	0.6025
Cspp1	40	chr1:10126340-10126479	+	CE	0.9868	0.98575	0.0010507	0.513	K0	0
Cspp1	41	chr1:10127423-10127563	+	CE	0.98816	0.98686	0.0013013	0.523	K0	0
Cspp1	42	chr1:10129986-10130032	+	CE	0.98384	0.98076	0.0030811	0.568	K0	0
Cspp1	43	chr1:10132454-10132517	+	CE	0.97877	0.97827	0.00050415	0.517	K0	0
Cspp1	44	chr1:10133164-10133273	+	CE	0.95466	0.92562	0.029048	0.578	K1	0.6254
Cspp1	45	chr1:10134092-10134230	+	CE	0.9894	0.98931	9.1708e-05	0.502	K0	0
Cspp1	46	chr1:10135934-10136145	+	TE	0.028265	0.0025511	0.025714	0.927	K1	0.296
Cspp1	47	chr1:10136146-10136768	+	TE	0.97174	0.99742	-0.025678	0.914	K1	0.296
Kif14	1	chr1:136467935-136467957	+	TS	0.24807	0.24448	0.0035835	0.578	K1	0.9789
Kif14	2	chr1:136467958-136468769	+	TS	0.75147	0.75551	-0.0040483	0.566	K1	0.9789
Kif14	3	chr1:136468770-136468919	+	RI	0.97617	0.95391	0.022258	0.826	K1	0.2833
Kif14	4	chr1:136468920-136469174	+	CE	0.99164	0.9866	0.0050428	0.615	K0	0
Kif14	5	chr1:136471320-136471574	+	CE	0.99038	0.98251	0.0078696	0.618	K0	0
Kif14	6	chr1:136473385-136473472	+	CE	0.98952	0.98402	0.005501	0.632	K0	0
Kif14	7	chr1:136476340-136476438	+	CE	0.99157	0.98584	0.0057311	0.616	K0	0
Kif14	8	chr1:136478359-136478411	+	CE	0.99033	0.98102	0.0093188	0.679	K0	0
Kif14	9	chr1:136479144-136479174	+	CE	0.98416	0.97676	0.0074041	0.579	K0	0
Kif14	10	chr1:136479808-136479915	+	CE	0.9881	0.98312	0.0049732	0.603	K0	0
Kif14	11	chr1:136482388-136482504	+	CE	0.99022	0.98398	0.00624	0.604	K0	0
Kif14	12	chr1:136482924-136483039	+	CE	0.99079	0.98352	0.0072725	0.641	K0	0
Kif14	13	chr1:136486272-136486444	+	CE	0.99317	0.99129	0.0018782	0.574	K0	0
Kif14	14	chr1:136487035-136487182	+	CE	0.99391	0.99171	0.0022005	0.594	K0	0
Kif14	15	chr1:136487404-136487467	+	CE	0.99461	0.99067	0.0039362	0.635	K0	0
Kif14	16	chr1:136490200-136490384	+	CE	0.99306	0.99016	0.0028922	0.596	K0	0
Kif14	17	chr1:136494628-136494730	+	CE	0.99216	0.98974	0.0024214	0.587	K0	0
Kif14	18	chr1:136495856-136496019	+	CE	0.99368	0.9915	0.0021763	0.55	K0	0
Kif14	19	chr1:136496570-136496717	+	CE	0.99327	0.98966	0.0036012	0.602	K0	0
Kif14	20	chr1:136497363-136497515	+	CE	0.99225	0.98644	0.005815	0.646	K0	0
Kif14	21	chr1:136500017-136500143	+	CE	0.99246	0.98563	0.0068302	0.65	K0	0
Kif14	22	chr1:136502647-136502740	+	CE	0.9925	0.98033	0.01217	0.748	K1	0.131
Kif14	23	chr1:136503310-136503439	+	CE	0.99276	0.98418	0.0085762	0.727	K1	0.131
Kif14	24	chr1:136510145-136510245	+	CE	0.99267	0.98422	0.0084456	0.712	K1	0.131
Kif14	25	chr1:136513734-136513822	+	CE	0.99245	0.98131	0.011146	0.724	K1	0.131
Kif14	26	chr1:136515854-136516078	+	CE	0.99117	0.98386	0.0073029	0.632	K0	0
Kif14	27	chr1:136516260-136516441	+	CE	0.98975	0.97974	0.010002	0.649	K0	0
Kif14	28	chr1:136519629-136519784	+	CE	0.98943	0.9831	0.0063287	0.625	K0	0
Kif14	29	chr1:136521190-136521309	+	CE	0.98923	0.98208	0.0071475	0.646	K0	0
Kif14	30	chr1:136525782-136525856	+	CE	0.98743	0.98049	0.0069438	0.619	K0	0
Kif14	31	chr1:136526775-136526907	+	CE	0.98685	0.98016	0.006693	0.611	K0	0
Mrpl30	1	chr1:37890477-37890531	+	TS	0.022677	0.036867	-0.014191	0.555	K1	0
Mrpl30	2	chr1:37890532-37890584	+	TS	0.97659	0.96187	0.014727	0.564	K1	0
Mrpl30	3	chr1:37890585-37892172	+	AD	0.027649	0.037474	-0.0098254	0.658	K2	1.1139
Mrpl30	4	chr1:37892943-37893023	+	CE	0.64834	0.69506	-0.04672	0.816	K2	1.1139
Mrpl30	6	chr1:37893939-37894015	+	CE	0.99802	0.99715	0.00086854	0.574	K0	0
Mrpl30	7	chr1:37894891-37895329	+	AA	0.043545	0.075272	-0.031728	0.861	K2	0.4953
Mrpl30	8	chr1:37895330-37895410	+	CE	0.9959	0.98967	0.0062292	0.833	K2	0.4953
Mrpl30	9	chr1:37897688-37897834	+	CE	0.99824	0.99772	0.00052535	0.54	K0	0
Mrpl30	10	chr1:37898061-37898338	+	TE	0.94308	0.92181	0.021267	0.71	K2	0.5452
Mrpl30	11	chr1:37898339-37898364	+	TE	0.041337	0.053034	-0.011698	0.579	K2	0.5452
Mrpl30	12	chr1:37898365-37898535	+	TE	0.01695	0.026831	-0.0098815	0.754	K2	0.5452
Gm28177	3	chr1:52079741-52079833	+	CE	0.91017	0.88745	0.022722	0.545	K0	0
Gm28177	4	chr1:52082518-52082577	+	CE	0.93659	0.9188	0.017788	0.551	K0	0
Gm28177	5	chr1:52082862-52082879	+	CE	0.94985	0.93905	0.010797	0.534	K0	0
Gm28177	6	chr1:52082978-52082983	+	AA	0.93826	0.94247	-0.0042136	0.557	K1	0.1682
Gm28177	7	chr1:52082984-52083071	+	CE	0.95405	0.94681	0.0072343	0.521	K0	0
Gm28177	8	chr1:52084079-52084123	+	CE	0.9475	0.94324	0.0042608	0.544	K0	0
Gm28177	9	chr1:52096785-52096868	+	CE	0.92047	0.92493	-0.0044556	0.521	K1	0.1353
Gm28177	10	chr1:52098387-52098485	+	CE	0.92604	0.92259	0.0034515	0.518	K1	0.1353
Gm28177	11	chr1:52100324-52100459	+	CE	0.93107	0.92933	0.0017439	0.508	K0	0
Gm28177	12	chr1:52101852-52101901	+	CE	0.93311	0.93335	-0.00023745	0.524	K0	0
Gm28177	13	chr1:52102117-52102211	+	CE	0.93824	0.93805	0.00019147	0.508	K0	0
Gm28177	14	chr1:52102481-52102617	+	CE	0.93398	0.89571	0.03827	0.641	K1	0.5151
Gm28177	15	chr1:52102848-52103039	+	CE	0.91422	0.88709	0.027136	0.583	K1	0.5151
Gm28177	16	chr1:52105206-52113881	+	AA	0.86174	0.85644	0.0052942	0.563	K1	0.5151
Gm28177	19	chr1:52119119-52119604	+	AD	0.93754	0.90746	0.030078	0.627	K7	2.4166
Gm28177	20	chr1:52119605-52119608	+	AD	0.9581	0.85234	0.10577	0.834	K7	2.4166
Gm28177	21	chr1:52119609-52119623	+	AD	0.75019	0.69074	0.059441	0.624	K7	2.4166
Gm28177	22	chr1:52119624-52119793	+	AD	0.13993	0.10517	0.034758	0.601	K7	2.4166
Gm28177	23	chr1:52119912-52120035	+	CE	0.97971	0.95329	0.026415	0.691	K7	2.4076
Gm28177	24	chr1:52120036-52120072	+	AD	0.91081	0.86165	0.04916	0.724	K7	2.4076
Gm28177	25	chr1:52122591-52122721	+	CE	0.98921	0.95941	0.029805	0.804	K7	2.4076
Gm28177	26	chr1:52123114-52123258	+	CE	0.96565	0.93435	0.031299	0.696	K7	2.4076
Gm28177	27	chr1:52126520-52126618	+	CE	0.96099	0.93888	0.022109	0.641	K7	2.4076
Gm28177	28	chr1:52132544-52132633	+	CE	0.96837	0.94589	0.022474	0.65	K7	2.4076
Gm28177	29	chr1:52135603-52135681	+	CE	0.95623	0.92357	0.032665	0.69	K7	2.4076
Gm28177	30	chr1:52136879-52136881	+	AA	0.94858	0.92894	0.019642	0.589	K7	2.4076
Gm28177	31	chr1:52136882-52136970	+	CE	0.94402	0.91766	0.026362	0.63	K7	2.4076
Gm28177	32	chr1:52137279-52137430	+	CE	0.91597	0.8944	0.021573	0.566	K7	2.4076
Gm28177	33	chr1:52139194-52139352	+	CE	0.92716	0.89495	0.032212	0.612	K7	2.4076
Gm28177	34	chr1:52140577-52140669	+	CE	0.94052	0.91005	0.030464	0.637	K7	2.4076
Gm28177	35	chr1:52142901-52142960	+	CE	0.95449	0.92933	0.025157	0.625	K7	2.4076
Gm28177	36	chr1:52144086-52144115	+	CE	0.96033	0.9318	0.028529	0.625	K7	2.4076
Gm28177	37	chr1:52144165-52144203	+	AA	0.37223	0.33587	0.036357	0.574	K7	2.6068
Gm28177	38	chr1:52144204-52144297	+	CE	0.97088	0.94211	0.028764	0.686	K7	2.6068
Gm28177	39	chr1:52145150-52145191	+	CE	0.96904	0.94136	0.027685	0.684	K7	2.6068
Gm28177	40	chr1:52147294-52147377	+	CE	0.98641	0.96508	0.021334	0.729	K7	2.6068
Gm28177	41	chr1:52147901-52147999	+	CE	0.98836	0.96661	0.021745	0.709	K7	2.6068
Gm28177	42	chr1:52148903-52149038	+	CE	0.96589	0.94843	0.017461	0.622	K7	2.6068
Gm28177	43	chr1:52149039-52149105	+	AD	0.19855	0.14934	0.049204	0.656	K7	2.6068
Gm28177	44	chr1:52149106-52150321	+	AD	0.15192	0.15202	-9.3325e-05	0.519	K7	2.6068
Gm28177	45	chr1:52150619-52150668	+	CE	0.9216	0.91195	0.00965	0.553	K7	2.6068
Gm28177	48	chr1:52151238-52151332	+	CE	0.90469	0.89173	0.012961	0.546	K7	2.4863
Gm28177	49	chr1:52152233-52152378	+	CE	0.92742	0.92173	0.0056904	0.502	K0	0
Gm28177	50	chr1:52153844-52154029	+	CE	0.94476	0.931	0.013762	0.534	K0	0
Gm28177	51	chr1:52154986-52155061	+	CE	0.92457	0.90471	0.019859	0.561	K2	1.0132
Kmo	1	chr1:175631996-175632179	+	TS	0.43814	0.49269	-0.054556	0.583	K1	0.9991
Kmo	2	chr1:175632180-175632273	+	TS	0.55561	0.50911	0.046498	0.568	K1	0.9991
Kmo	3	chr1:175633466-175637508	+	AA	0.10737	0.22413	-0.11676	0.802	K1	0.6607
Kmo	4	chr1:175637509-175637578	+	CE	0.96358	0.93713	0.026454	0.645	K0	0
Kmo	5	chr1:175637887-175637984	+	CE	0.96554	0.95007	0.015461	0.518	K0	0
Kmo	6	chr1:175639100-175639189	+	CE	0.96615	0.947	0.019149	0.557	K0	0
Kmo	7	chr1:175643558-175643606	+	CE	0.96093	0.94057	0.020361	0.566	K0	0
Kmo	8	chr1:175647113-175647200	+	CE	0.83494	0.88278	-0.047842	0.6	K1	0.8222
Kmo	9	chr1:175649152-175649317	+	CE	0.95471	0.94576	0.008944	0.502	K0	0
Kmo	10	chr1:175649318-175649679	+	AD	0.26358	0.14153	0.12206	0.763	K1	0.8606
Kmo	11	chr1:175650565-175650636	+	CE	0.93622	0.96195	-0.025725	0.608	K0	0
Kmo	12	chr1:175651587-175651708	+	CE	0.9493	0.96089	-0.011587	0.578	K0	0
Kmo	13	chr1:175653527-175653674	+	CE	0.95934	0.95648	0.0028598	0.537	K0	0
Kmo	14	chr1:175655069-175655126	+	CE	0.94798	0.93896	0.0090211	0.538	K0	0
Kmo	15	chr1:175656721-175656803	+	CE	0.95251	0.92918	0.023331	0.605	K0	0
Kmo	16	chr1:175658321-175658422	+	CE	0.94581	0.94733	-0.0015159	0.539	K0	0
Kmo	17	chr1:175658513-175658572	+	CE	0.92288	0.94874	-0.025862	0.556	K0	0
Kmo	18	chr1:175659643-175660853	+	TE	0.92999	0.91359	0.016399	0.552	K1	0.6136
Kmo	19	chr1:175660854-175662116	+	TE	0.071141	0.086633	-0.015492	0.529	K1	0.6136
Fbxo36	2	chr1:84881092-84881200	+	CE	0.94557	0.91277	0.032802	0.561	K0	0
Fbxo36	3	chr1:84896490-84896662	+	CE	0.9438	0.90434	0.039466	0.624	K0	0
Apoa2	9	chr1:171225666-171225798	+	CE	0.87118	0.86835	0.0028294	0.517	K0	0
Nhej1	2	chr1:75045309-75045367	-	CE	0.97176	0.97913	-0.0073689	0.51	K0	0
Nhej1	3	chr1:74968795-74968912	-	CE	0.97069	0.96727	0.0034168	0.534	K0	0
Nhej1	4	chr1:74968169-74968275	-	CE	0.85584	0.91706	-0.061223	0.774	K1	0.6763
Smarcal1	2	chr1:72583615-72583737	+	AF	0.015093	0.021674	-0.0065809	0.573	K0	0
Smarcal1	3	chr1:72585638-72586404	+	CE	0.99195	0.98984	0.0021124	0.564	K0	0
Smarcal1	4	chr1:72587051-72587101	+	CE	0.99109	0.98977	0.001315	0.541	K0	0
Smarcal1	5	chr1:72587625-72587821	+	CE	0.08033	0.0371	0.04323	0.824	K1	0.3852
Smarcal1	6	chr1:72591063-72591275	+	CE	0.99307	0.99098	0.0020955	0.519	K0	0
Smarcal1	7	chr1:72591825-72591875	+	CE	0.99281	0.99102	0.0017898	0.542	K0	0
Smarcal1	8	chr1:72595788-72595974	+	CE	0.99035	0.98945	0.00089634	0.514	K0	0
Smarcal1	9	chr1:72597379-72597529	+	CE	0.99107	0.9884	0.00267	0.533	K0	0
Smarcal1	10	chr1:72598771-72598929	+	CE	0.99069	0.98724	0.0034534	0.567	K0	0
Smarcal1	11	chr1:72601369-72601434	+	CE	0.9885	0.98485	0.0036488	0.605	K0	0
Smarcal1	12	chr1:72611295-72611435	+	CE	0.98833	0.98721	0.0011167	0.508	K0	0
Smarcal1	13	chr1:72612809-72613024	+	CE	0.98982	0.98795	0.001872	0.53	K0	0
Smarcal1	14	chr1:72616508-72616578	+	CE	0.99071	0.98444	0.0062654	0.585	K0	0
Smarcal1	15	chr1:72620032-72620134	+	CE	0.99031	0.98416	0.0061533	0.606	K0	0
Smarcal1	16	chr1:72626463-72626645	+	CE	0.99262	0.99023	0.0023927	0.529	K0	0
Smarcal1	17	chr1:72628101-72628201	+	CE	0.99287	0.99052	0.0023534	0.558	K0	0
Smarcal1	18	chr1:72629161-72629232	+	CE	0.080337	0.11067	-0.030337	0.591	K1	0.6681
Smarcal1	19	chr1:72629375-72629471	+	CE	0.99173	0.9881	0.0036289	0.591	K0	0
Rgs18	3	chr1:144773521-144773582	-	CE	0.95753	0.84039	0.11714	0.832	K1	0.6598
Rgs18	4	chr1:144755923-144756089	-	CE	0.92614	0.91822	0.0079221	0.557	K0	0
Myeov2	2	chr1:92641607-92641879	-	AD	0.0027547	0.022165	-0.019411	0.993	K2	0.4179
Myeov2	3	chr1:92640244-92640564	-	AF	0.002771	0.0038519	-0.0010808	0.554	K0	0
Myeov2	4	chr1:92639687-92639759	-	CE	0.95672	0.95223	0.0044911	0.586	K2	0.3922
Myo1b	34	chr1:51749994-51751296	-	TE	0.91428	0.76627	0.14801	0.791	K2	0.9605
Myo1b	35	chr1:51749989-51749993	-	TE	0.082715	0.071369	0.011346	0.565	K2	0.9605
Myo1b	36	chr1:51749982-51749988	-	TE	0.079567	0.067196	0.012371	0.564	K2	0.9605
Myo1b	37	chr1:51749765-51749981	-	TE	0.080758	0.23307	-0.15231	0.796	K2	0.9605
Creg1	2	chr1:165764139-165764754	+	AD	0.020523	0.034259	-0.013736	0.584	K1	0.2108
Creg1	3	chr1:165769476-165769520	+	AF	0.020413	0.023424	-0.0030109	0.514	K0	0
Creg1	4	chr1:165769813-165769932	+	CE	0.99223	0.99015	0.0020806	0.52	K0	0
Creg1	5	chr1:165770632-165770816	+	CE	0.99379	0.99203	0.0017628	0.509	K0	0
Creg1	6	chr1:165773844-165773918	+	TE	0.98151	0.97867	0.0028355	0.612	K1	0.1496
Creg1	7	chr1:165773919-165775308	+	TE	0.018345	0.021442	-0.0030978	0.615	K1	0.1496
Eya1	23	chr1:14170643-14170996	-	TE	0.076034	0.69228	-0.61624	1	K2	1.1503
Eya1	24	chr1:14169666-14170642	-	TE	0.76326	0.18919	0.57407	0.996	K2	1.1503
Eya1	25	chr1:14168958-14169665	-	TE	0.22804	0.19435	0.033699	0.616	K2	1.1503
Eya1	26	chr1:14168954-14168957	-	TE	0.080088	0.090514	-0.010425	0.528	K2	1.1503
Rgs8	12	chr1:153692725-153692946	+	TE	0.13374	0.054109	0.079635	0.732	K3	0.9949
Rgs8	13	chr1:153692947-153692985	+	TE	0.13078	0.055803	0.07498	0.728	K3	0.9949
Rgs8	14	chr1:153692986-153695578	+	TE	0.52979	0.053928	0.47586	0.998	K3	0.9949
Rgs8	15	chr1:153695579-153697667	+	TE	0.46168	0.94585	-0.48417	0.995	K3	0.9949
Rgs8	16	chr1:153697668-153700323	+	TE	0.13041	0.053597	0.076813	0.733	K3	0.9949
Dedd	1	chr1:171329145-171329398	+	TS	0.076205	0.09417	-0.017965	0.529	K2	0.958
Dedd	2	chr1:171329399-171329407	+	TS	0.4935	0.66662	-0.17312	0.771	K2	0.958
Dedd	3	chr1:171329408-171329526	+	TS	0.50825	0.32515	0.18311	0.76	K2	0.958
Dedd	6	chr1:171331253-171331256	+	AA	0.55735	0.57623	-0.018881	0.507	K2	1.5698
Dedd	9	chr1:171338252-171338640	+	CE	0.98069	0.97587	0.0048189	0.523	K0	0
Dedd	10	chr1:171338823-171338930	+	CE	0.99019	0.96121	0.028973	0.784	K1	0.3454
Dedd	11	chr1:171340193-171340339	+	CE	0.98271	0.98443	-0.0017196	0.532	K0	0
Dedd	12	chr1:171340828-171341616	+	TE	0.0079084	0.0068798	0.0010286	0.549	K2	0.3135
Dedd	13	chr1:171341617-171341682	+	TE	0.035111	0.0068068	0.028304	0.864	K2	0.3135
Dedd	14	chr1:171341683-171342325	+	TE	0.49978	0.33541	0.16437	0.577	K2	0.3135
Dedd	15	chr1:171342326-171342331	+	TE	0.47302	0.6644	-0.19137	0.653	K2	0.3135
Tyw5	2	chr1:57401388-57401523	-	CE	0.98202	0.97479	0.007231	0.583	K0	0
Tyw5	3	chr1:57401369-57401387	-	AD	0.39729	0.36743	0.029857	0.57	K1	0.9975
Tyw5	4	chr1:57396727-57396796	-	CE	0.97929	0.9746	0.0046932	0.513	K0	0
Tyw5	5	chr1:57394047-57394091	-	CE	0.97944	0.97807	0.0013713	0.506	K0	0
Tyw5	6	chr1:57393670-57393694	-	CE	0.1646	0.1708	-0.0062033	0.5	K1	0.8273
Tyw5	7	chr1:57393350-57393487	-	CE	0.99024	0.98808	0.0021512	0.544	K0	0
Tyw5	8	chr1:57391449-57391536	-	CE	0.98925	0.98469	0.0045634	0.553	K0	0
Tyw5	9	chr1:57390642-57390758	-	CE	0.97921	0.97234	0.0068647	0.519	K0	0
Il18r1	3	chr1:40465782-40465810	+	AD	0.32317	0.64401	-0.32084	0.873	K4	2.7396
Il18r1	4	chr1:40465970-40466005	+	TS	0.82271	0.92228	-0.099572	0.707	K1	0.8987
Il18r1	5	chr1:40466006-40466160	+	TS	0.17549	0.076445	0.099043	0.68	K1	0.8987
Il18r1	6	chr1:40466161-40466269	+	CE	0.94403	0.81941	0.12462	0.927	K4	3.4028
Il18r1	7	chr1:40466270-40466357	+	AD	0.49102	0.45904	0.031982	0.564	K4	3.4028
Il18r1	8	chr1:40466358-40466364	+	AD	0.18057	0.28884	-0.10827	0.707	K4	3.4028
Il18r1	9	chr1:40470762-40470880	+	CE	0.059074	0.1478	-0.088725	0.741	K4	3.4028
Il18r1	10	chr1:40471729-40471814	+	CE	0.99492	0.9591	0.035823	0.899	K0	0
Il18r1	11	chr1:40471815-40473300	+	AD	0.093359	0.10977	-0.016408	0.509	K1	0.5157
Il18r1	12	chr1:40474694-40474940	+	CE	0.99474	0.9591	0.035642	0.865	K0	0
Il18r1	13	chr1:40478385-40478550	+	CE	0.99385	0.95273	0.041114	0.847	K0	0
Il18r1	14	chr1:40480922-40481066	+	CE	0.99467	0.96243	0.032239	0.88	K0	0
Il18r1	15	chr1:40484281-40484343	+	CE	0.99006	0.96888	0.021178	0.705	K1	0.08
Il18r1	16	chr1:40486975-40487098	+	CE	0.99517	0.96168	0.033494	0.861	K0	0
Il18r1	17	chr1:40489601-40489740	+	CE	0.99385	0.95019	0.043667	0.88	K0	0
Il18r1	18	chr1:40491058-40491216	+	CE	0.98282	0.95596	0.02686	0.687	K2	1.1319
Il18r1	19	chr1:40491217-40491578	+	TE	0.49836	0.91606	-0.4177	0.533	K1	0.0004
Il18r1	20	chr1:40491579-40491580	+	TE	0.50173	0.083523	0.41821	0.505	K1	0.0004
Il18r1	21	chr1:40495749-40495907	+	CE	0.99092	0.93187	0.05905	0.852	K0	0
Il18r1	22	chr1:40498338-40499138	+	CE	0.98558	0.91741	0.068166	0.841	K0	0
Il18r1	23	chr1:40499139-40499165	+	AD	0.97989	0.92031	0.059577	0.801	K0	0
Il18r1	24	chr1:40499166-40500445	+	RI	0.97829	0.91348	0.064803	0.817	K0	0
Il18r1	25	chr1:40500446-40500476	+	AA	0.98162	0.88895	0.092667	0.886	K0	0
Il18r1	26	chr1:40500477-40500833	+	TE	0.0063413	0.33618	-0.32984	0.544	K2	0.06
Il18r1	27	chr1:40500834-40500853	+	TE	0.98693	0.65792	0.32901	0.543	K2	0.06
Il18r1	28	chr1:40500854-40500854	+	TE	0.013079	0.050347	-0.037268	0.806	K2	0.06
Rfwd2	2	chr1:159239562-159239621	+	CE	0.99543	0.996	-0.00056884	0.537	K0	0
Rfwd2	3	chr1:159244589-159244686	+	CE	0.97734	0.95366	0.023683	0.838	K2	0.5332
Rfwd2	4	chr1:159244687-159244840	+	AD	0.019831	0.043646	-0.023814	0.778	K2	0.6271
Rfwd2	5	chr1:159249202-159249266	+	CE	0.99784	0.99785	-1.3668e-05	0.53	K0	0
Rfwd2	6	chr1:159249267-159249278	+	AD	0.38072	0.4053	-0.024583	0.676	K1	0.9951
Rfwd2	7	chr1:159250023-159250142	+	CE	0.99822	0.99827	-5.2867e-05	0.542	K0	0
Rfwd2	8	chr1:159252548-159252616	+	CE	0.99832	0.99807	0.00024596	0.521	K0	0
Rfwd2	9	chr1:159258647-159258742	+	CE	0.21747	0.24007	-0.022594	0.612	K2	0.9695
Rfwd2	10	chr1:159266757-159266816	+	CE	0.99161	0.9934	-0.0017907	0.587	K2	0.9695
Rfwd2	11	chr1:159268109-159268185	+	CE	0.99712	0.99278	0.0043378	0.674	K2	0.9695
Rfwd2	12	chr1:159278089-159278091	+	AA	0.99594	0.97466	0.021283	0.772	K1	0.3407
Rfwd2	13	chr1:159278092-159278146	+	CE	0.99699	0.99653	0.00045921	0.541	K0	0
Rfwd2	14	chr1:159284548-159284662	+	CE	0.99099	0.98598	0.0050151	0.511	K1	0.2124
Rfwd2	15	chr1:159288905-159289040	+	CE	0.9979	0.99794	-4.3271e-05	0.509	K0	0
Rfwd2	16	chr1:159306573-159306716	+	CE	0.99819	0.998	0.00018608	0.522	K0	0
Rfwd2	17	chr1:159308410-159308518	+	CE	0.99815	0.9979	0.00025837	0.549	K0	0
Rfwd2	18	chr1:159308883-159308964	+	CE	0.99796	0.99778	0.00018091	0.542	K0	0
Rfwd2	19	chr1:159319724-159319840	+	CE	0.99751	0.99733	0.00017856	0.532	K0	0
Rfwd2	20	chr1:159324917-159325034	+	CE	0.99654	0.99648	6.4399e-05	0.523	K0	0
Rfwd2	21	chr1:159327077-159327084	+	AA	0.99567	0.99547	0.00020215	0.525	K0	0
Rfwd2	22	chr1:159327085-159327201	+	CE	0.99691	0.99672	0.00019095	0.503	K0	0
Rfwd2	23	chr1:159328602-159328762	+	CE	0.9973	0.99676	0.00054613	0.566	K0	0
Rfwd2	24	chr1:159342807-159342851	+	CE	0.99631	0.99562	0.00069073	0.525	K0	0
Psen2	6	chr1:180245614-180245757	-	CE	0.96695	0.95952	0.0074302	0.548	K0	0
Psen2	7	chr1:180240731-180240945	-	CE	0.97511	0.97115	0.0039628	0.549	K0	0
Psen2	8	chr1:180238873-180239014	-	CE	0.97957	0.97182	0.0077473	0.586	K0	0
Psen2	9	chr1:180235911-180235978	-	CE	0.98289	0.97733	0.0055623	0.58	K0	0
Psen2	10	chr1:180234989-180235209	-	CE	0.97658	0.97262	0.0039595	0.539	K0	0
Psen2	11	chr1:180233611-180233709	-	CE	0.96295	0.95007	0.012884	0.596	K0	0
Psen2	12	chr1:180229842-180229925	-	CE	0.9581	0.92404	0.034059	0.63	K0	0
Psen2	13	chr1:180229485-180229487	-	AA	0.86107	0.8742	-0.013137	0.612	K1	0.7365
Psen2	14	chr1:180229386-180229484	-	CE	0.95034	0.93309	0.017252	0.563	K0	0
Psen2	15	chr1:180229381-180229385	-	AD	0.12063	0.18893	-0.068303	0.694	K1	0.6264
Psen2	16	chr1:180228843-180228961	-	CE	0.9647	0.95044	0.01426	0.579	K0	0
Psen2	17	chr1:180227445-180227728	-	TE	0.0075209	0.070265	-0.062744	0.814	K2	0.7439
Psen2	18	chr1:180227443-180227444	-	TE	0.0075983	0.030537	-0.022939	0.765	K2	0.7439
Psen2	19	chr1:180227006-180227442	-	TE	0.98265	0.60041	0.38224	0.664	K2	0.7439
Psen2	20	chr1:180227004-180227005	-	TE	0.01784	0.32377	-0.30593	0.538	K2	0.7439
Hibch	1	chr1:52845013-52845045	+	TS	0.94796	0.94284	0.0051214	0.571	K1	0.1579
Hibch	2	chr1:52845046-52845144	+	TS	0.04998	0.057565	-0.0075842	0.532	K1	0.1579
Hibch	3	chr1:52853668-52853710	+	CE	0.98328	0.9756	0.0076875	0.574	K0	0
Hibch	4	chr1:52860028-52860165	+	CE	0.9321	0.94438	-0.012282	0.65	K1	0.4737
Hibch	5	chr1:52862268-52862352	+	CE	0.99148	0.98976	0.0017208	0.538	K0	0
Hibch	6	chr1:52865549-52865629	+	CE	0.9773	0.99061	-0.013306	0.769	K1	0.1964
Hibch	7	chr1:52868906-52868958	+	CE	0.99019	0.98807	0.00212	0.506	K0	0
Hibch	8	chr1:52885103-52885181	+	CE	0.9911	0.98496	0.0061387	0.589	K0	0
Hibch	9	chr1:52901188-52901333	+	CE	0.99315	0.98845	0.0046966	0.594	K0	0
Hibch	10	chr1:52902847-52902933	+	CE	0.99194	0.98871	0.0032343	0.582	K0	0
Hibch	11	chr1:52904642-52904700	+	CE	0.99202	0.99046	0.0015612	0.567	K0	0
Hibch	12	chr1:52905371-52905452	+	CE	0.99232	0.98986	0.0024656	0.607	K0	0
Hibch	13	chr1:52913731-52913850	+	CE	0.98908	0.9814	0.0076863	0.598	K0	0
Hibch	14	chr1:52916637-52916670	+	CE	0.98504	0.97972	0.0053186	0.578	K0	0
Hibch	15	chr1:52920263-52920981	+	TE	0.99617	0.99525	0.00092367	0.536	K1	0.0002
Hibch	16	chr1:52920982-52920986	+	TE	0.0037612	0.0047954	-0.0010342	0.516	K1	0.0002
9430016H08Rik	2	chr1:57409912-57409983	+	CE	0.99047	0.98957	0.00090101	0.512	K0	0
9430016H08Rik	3	chr1:57411723-57411849	+	CE	0.9929	0.99271	0.00019187	0.501	K0	0
9430016H08Rik	4	chr1:57411850-57411906	+	AD	0.011599	0.03476	-0.02316	0.868	K1	0.1949
9430016H08Rik	5	chr1:57413240-57413387	+	CE	0.99412	0.99226	0.0018674	0.592	K0	0
Mfsd6	2	chr1:52708164-52709755	-	CE	0.9467	0.95298	-0.0062802	0.564	K0	0
Mfsd6	3	chr1:52676478-52676575	-	CE	0.9516	0.95924	-0.0076334	0.562	K0	0
Mfsd6	4	chr1:52663285-52663446	-	CE	0.95612	0.96422	-0.0080992	0.559	K0	0
Mfsd6	5	chr1:52662390-52662488	-	CE	0.97384	0.96788	0.0059585	0.542	K0	0
Mfsd6	6	chr1:52660807-52661087	-	CE	0.97644	0.96603	0.010417	0.584	K0	0
Pfkfb2	2	chr1:130718822-130718975	-	CE	0.97496	0.9718	0.0031643	0.543	K0	0
Pfkfb2	3	chr1:130716744-130718821	-	AD	0.98222	0.97916	0.0030687	0.548	K0	0
Pfkfb2	4	chr1:130715882-130716743	-	AD	0.95073	0.8433	0.10743	0.778	K2	1.1101
Pfkfb2	9	chr1:130708076-130708201	-	CE	0.94942	0.96025	-0.010827	0.532	K0	0
Pfkfb2	10	chr1:130707509-130707605	-	CE	0.84583	0.93176	-0.085932	0.817	K1	0.5734
Pfkfb2	11	chr1:130707052-130707118	-	CE	0.96754	0.9693	-0.0017608	0.531	K0	0
Pfkfb2	12	chr1:130706843-130706917	-	CE	0.97009	0.98162	-0.011524	0.63	K0	0
Pfkfb2	13	chr1:130706426-130706482	-	CE	0.97657	0.98642	-0.0098526	0.62	K0	0
Pfkfb2	14	chr1:130705377-130705501	-	CE	0.9765	0.87966	0.096832	0.784	K1	0.8548
Pfkfb2	15	chr1:130702231-130702438	-	CE	0.97541	0.97658	-0.001178	0.502	K0	0
Pfkfb2	16	chr1:130701705-130701851	-	CE	0.98181	0.97895	0.0028553	0.538	K0	0
Pfkfb2	17	chr1:130700770-130700874	-	CE	0.97886	0.9774	0.001462	0.533	K0	0
Pfkfb2	18	chr1:130699981-130700110	-	CE	0.97155	0.97343	-0.0018884	0.5	K0	0
Pfkfb2	19	chr1:130699188-130699250	-	CE	0.97098	0.95373	0.01725	0.608	K1	0.3481
Pfkfb2	20	chr1:130698679-130698743	-	CE	0.96847	0.9754	-0.0069249	0.571	K0	0
Pfkfb2	21	chr1:130697906-130698085	-	CE	0.8377	0.87792	-0.040218	0.543	K2	1.4425
Pfkfb2	24	chr1:130697017-130697085	-	CE	0.84374	0.87695	-0.033209	0.529	K2	1.4425
Pfkfb2	26	chr1:130691015-130691148	-	TE	0.010976	0.0095413	0.0014346	0.528	K3	1.8268
Pfkfb2	27	chr1:130690773-130691014	-	TE	0.27824	0.19534	0.082901	0.574	K3	1.8268
Pfkfb2	28	chr1:130690278-130690772	-	TE	0.43572	0.29541	0.14031	0.716	K3	1.8268
Pfkfb2	29	chr1:130689183-130690277	-	TE	0.17883	0.32597	-0.14714	0.764	K3	1.8268
Pfkfb2	30	chr1:130689182-130689182	-	TE	0.1282	0.20209	-0.073881	0.816	K3	1.8268
Fam117b	2	chr1:59949053-59949204	+	CE	0.9809	0.97612	0.0047885	0.525	K0	0
Fam117b	3	chr1:59952935-59953024	+	CE	0.98341	0.98255	0.00085413	0.502	K0	0
Fam117b	4	chr1:59958322-59958435	+	CE	0.98151	0.9809	0.00061257	0.514	K0	0
Fam117b	5	chr1:59968954-59969097	+	CE	0.98577	0.97881	0.0069591	0.594	K0	0
Fam117b	6	chr1:59970486-59970711	+	CE	0.99	0.98437	0.0056305	0.605	K0	0
Fam117b	7	chr1:59974883-59975003	+	CE	0.99089	0.96728	0.023603	0.753	K1	0.3368
Ppox	2	chr1:171280873-171280953	-	AD	0.92116	0.9422	-0.02104	0.689	K1	0.4514
Ppox	3	chr1:171280674-171280768	-	CE	0.99324	0.98867	0.0045692	0.638	K0	0
Ppox	4	chr1:171280388-171280522	-	CE	0.99048	0.98127	0.0092054	0.651	K0	0
Ppox	5	chr1:171280140-171280255	-	CE	0.97343	0.89669	0.076741	0.702	K1	0.7799
Ppox	6	chr1:171279869-171280001	-	CE	0.95098	0.88482	0.06616	0.677	K1	0.7799
Ppox	7	chr1:171279430-171279574	-	CE	0.98384	0.97717	0.0066702	0.582	K0	0
Ppox	8	chr1:171279123-171279313	-	CE	0.98635	0.98286	0.00349	0.539	K0	0
Ppox	9	chr1:171278135-171278195	-	CE	0.98967	0.98636	0.0033134	0.568	K0	0
Ppox	10	chr1:171277882-171278000	-	CE	0.99224	0.99052	0.0017199	0.55	K0	0
Ppox	11	chr1:171277752-171277804	-	CE	0.99161	0.9909	0.00071169	0.525	K0	0
Ppox	12	chr1:171277694-171277751	-	AD	0.95066	0.9466	0.0040615	0.542	K1	0.461
Ppox	13	chr1:171277447-171277596	-	CE	0.98915	0.98684	0.0023128	0.561	K0	0
Ppox	14	chr1:171277286-171277328	-	CE	0.98819	0.98685	0.0013415	0.508	K0	0
Pam	7	chr1:97975785-97975905	-	CE	0.93449	0.89669	0.037802	0.629	K0	0
Pam	8	chr1:97944620-97944677	-	CE	0.95526	0.92046	0.034792	0.656	K0	0
Pam	9	chr1:97934651-97934738	-	CE	0.96768	0.93753	0.030151	0.664	K0	0
Pam	10	chr1:97924431-97924516	-	CE	0.95866	0.93488	0.023779	0.605	K0	0
Pam	11	chr1:97923094-97923177	-	CE	0.948	0.94263	0.0053771	0.525	K0	0
Pam	12	chr1:97898341-97898389	-	CE	0.95813	0.94889	0.0092417	0.552	K0	0
Pam	13	chr1:97897208-97897275	-	CE	0.96106	0.9547	0.0063577	0.547	K0	0
Pam	14	chr1:97895969-97896049	-	CE	0.92115	0.88304	0.038104	0.614	K1	0.5508
Pam	15	chr1:97895632-97895708	-	CE	0.95942	0.94839	0.011033	0.522	K0	0
Pam	16	chr1:97894361-97894464	-	CE	0.95328	0.92921	0.024079	0.54	K0	0
Pam	17	chr1:97885602-97885786	-	CE	0.96624	0.94375	0.022482	0.588	K0	0
Pam	18	chr1:97884126-97884197	-	CE	0.96929	0.92065	0.048638	0.661	K0	0
Pam	19	chr1:97864203-97864520	-	CE	0.21078	0.33386	-0.12308	0.716	K1	0.8352
Pam	20	chr1:97853103-97853232	-	CE	0.95379	0.92284	0.030953	0.63	K0	0
Pam	21	chr1:97844596-97844712	-	CE	0.96422	0.93475	0.02947	0.652	K0	0
Pam	22	chr1:97842232-97842304	-	CE	0.96357	0.90506	0.058518	0.708	K0	0
Pam	23	chr1:97840699-97840909	-	CE	0.96411	0.93429	0.029829	0.663	K0	0
Pam	24	chr1:97840280-97840480	-	CE	0.95259	0.93891	0.013681	0.565	K0	0
Pam	25	chr1:97837963-97838078	-	CE	0.94652	0.93917	0.0073453	0.541	K0	0
Pam	26	chr1:97834408-97834516	-	CE	0.95149	0.93717	0.014319	0.517	K0	0
Pam	27	chr1:97831455-97831508	-	CE	0.93424	0.93242	0.0018124	0.503	K0	0
Pam	28	chr1:97826038-97826040	-	AA	0.47955	0.7721	-0.29255	0.914	K3	2.1978
Pam	29	chr1:97825837-97826037	-	CE	0.68941	0.66089	0.02852	0.58	K3	2.1978
Pam	30	chr1:97822936-97822989	-	CE	0.47947	0.68227	-0.20279	0.859	K3	2.1978
Pam	31	chr1:97821100-97821988	-	TE	0.97414	0.34606	0.62809	0.758	K2	0.5729
Pam	32	chr1:97821095-97821099	-	TE	0.025484	0.56984	-0.54436	0.872	K2	0.5729
Pam	33	chr1:97821094-97821094	-	TE	0.025436	0.11283	-0.087393	0.9	K2	0.5729
4732440D04Rik	1	chr1:6214591-6215293	-	TS	0.40055	0.52381	-0.12327	0.617	K1	0.9972
4732440D04Rik	2	chr1:6214233-6214590	-	TS	0.60014	0.47388	0.12626	0.662	K1	0.9972
4732440D04Rik	3	chr1:6213348-6214232	-	RI	0.93847	0.98336	-0.04489	0.764	K1	0.4158
4732440D04Rik	4	chr1:6213293-6213347	-	TE	0.0020637	0.0022096	-0.00014582	0.504	K1	0
4732440D04Rik	5	chr1:6209866-6213292	-	TE	0.99799	0.99784	0.00015235	0.508	K1	0
Bpnt1	1	chr1:185332149-185332171	+	TS	0.079459	0.25917	-0.17971	0.85	K2	1.497
Bpnt1	2	chr1:185332172-185332179	+	TS	0.70538	0.51673	0.18865	0.889	K2	1.497
Bpnt1	3	chr1:185332180-185332263	+	TS	0.26261	0.25454	0.0080709	0.535	K2	1.497
Bpnt1	4	chr1:185332264-185332321	+	AD	0.094998	0.085023	0.0099755	0.569	K2	1.2056
Bpnt1	5	chr1:185338106-185338232	+	CE	0.84629	0.78953	0.056759	0.696	K2	0.8903
Bpnt1	6	chr1:185341223-185341327	+	CE	0.98161	0.98575	-0.004142	0.597	K0	0
Bpnt1	7	chr1:185345315-185345422	+	CE	0.98101	0.98218	-0.0011719	0.536	K0	0
Bpnt1	8	chr1:185346675-185346723	+	CE	0.97586	0.96615	0.0097073	0.562	K0	0
Bpnt1	9	chr1:185348744-185348835	+	CE	0.94954	0.96555	-0.016012	0.616	K2	0.6803
Bpnt1	10	chr1:185349837-185349881	+	CE	0.10252	0.16154	-0.059012	0.713	K2	0.7
Bpnt1	11	chr1:185352182-185352379	+	CE	0.98273	0.98304	-0.00031151	0.534	K0	0
Bpnt1	12	chr1:185353957-185354062	+	CE	0.98529	0.96863	0.016655	0.684	K1	0.2777
Bpnt1	13	chr1:185356478-185356781	+	TE	0.52236	0.54965	-0.027289	0.639	K1	0.9998
Bpnt1	14	chr1:185356782-185357777	+	TE	0.47902	0.45074	0.028274	0.675	K1	0.9998
Mcmdc2	28	chr1:9940911-9940954	+	TE	0.0091895	0.012968	-0.0037781	0.531	K1	0
Mcmdc2	29	chr1:9940955-9942085	+	TE	0.9908	0.98694	0.0038608	0.558	K1	0
Dgkd	2	chr1:87853457-87853666	+	AD	0.030415	0.027118	0.0032974	0.514	K0	0
Dgkd	3	chr1:87853667-87878422	+	AD	0.029814	0.028989	0.00082511	0.507	K0	0
Dgkd	4	chr1:87880368-87880478	+	CE	0.99628	0.99752	-0.001247	0.609	K0	0
Dgkd	5	chr1:87881859-87881939	+	CE	0.98694	0.99308	-0.0061338	0.687	K2	0.4423
Dgkd	6	chr1:87908224-87908442	+	CE	0.054847	0.034443	0.020404	0.887	K2	0.4423
Dgkd	7	chr1:87908561-87909375	+	CE	0.055336	0.034632	0.020704	0.885	K2	0.4692
Dgkd	8	chr1:87915100-87915204	+	CE	0.99819	0.99275	0.0054357	0.733	K2	0.3496
Dgkd	9	chr1:87915492-87915624	+	CE	0.99861	0.99901	-0.00039512	0.555	K0	0
Dgkd	10	chr1:87916369-87916475	+	CE	0.99868	0.99906	-0.00038489	0.586	K0	0
Dgkd	11	chr1:87916807-87916932	+	CE	0.99832	0.99877	-0.00044608	0.61	K0	0
Dgkd	12	chr1:87917892-87917994	+	CE	0.99819	0.99869	-0.00050087	0.597	K0	0
Dgkd	13	chr1:87918559-87918721	+	CE	0.99819	0.99873	-0.0005414	0.595	K0	0
Dgkd	14	chr1:87921573-87921681	+	CE	0.9979	0.97328	0.024617	1	K2	0.7
Dgkd	15	chr1:87921682-87922379	+	AD	0.14864	0.15076	-0.0021177	0.504	K2	0.8804
Dgkd	16	chr1:87924072-87924211	+	CE	0.98339	0.99151	-0.0081188	0.696	K2	0.2933
Dgkd	17	chr1:87924480-87924564	+	CE	0.98385	0.99171	-0.0078565	0.672	K2	0.5686
Dgkd	18	chr1:87925694-87925788	+	CE	0.99857	0.99885	-0.00027432	0.545	K0	0
Dgkd	19	chr1:87925873-87925972	+	CE	0.99844	0.99871	-0.00026531	0.568	K0	0
Dgkd	20	chr1:87926051-87926324	+	CE	0.9876	0.99143	-0.0038309	0.643	K1	0.1474
Dgkd	21	chr1:87926866-87927024	+	CE	0.99823	0.99858	-0.00034645	0.546	K0	0
Dgkd	22	chr1:87927685-87927810	+	CE	0.99821	0.99853	-0.00031802	0.545	K0	0
Dgkd	23	chr1:87929741-87929837	+	CE	0.99875	0.99904	-0.00029199	0.56	K0	0
Dgkd	24	chr1:87931932-87932042	+	CE	0.99887	0.99922	-0.00034365	0.602	K0	0
Dgkd	25	chr1:87934106-87934202	+	CE	0.99821	0.99874	-0.00052878	0.587	K0	0
Dgkd	26	chr1:87934394-87934501	+	CE	0.99755	0.99811	-0.0005531	0.581	K0	0
Dgkd	27	chr1:87935338-87935451	+	CE	0.96488	0.96248	0.002403	0.524	K1	0.3113
Dgkd	28	chr1:87936284-87936418	+	CE	0.998	0.99834	-0.00034426	0.543	K0	0
Dgkd	29	chr1:87936749-87936900	+	CE	0.99822	0.99872	-0.00050636	0.585	K0	0
Dgkd	30	chr1:87938154-87938265	+	CE	0.99815	0.99868	-0.00053038	0.615	K0	0
Dgkd	31	chr1:87938346-87938438	+	CE	0.99801	0.99858	-0.00056487	0.553	K0	0
Dgkd	32	chr1:87939196-87939315	+	CE	0.9982	0.99867	-0.00046487	0.547	K0	0
Dgkd	33	chr1:87940177-87940306	+	CE	0.99751	0.99825	-0.000742	0.575	K0	0
Dgkd	34	chr1:87941369-87941499	+	CE	0.99747	0.99788	-0.00040225	0.549	K0	0
Mpzl1	9	chr1:165593413-165593677	-	TE	0.28308	0.42571	-0.14262	0.645	K2	0.9999
Mpzl1	10	chr1:165593410-165593412	-	TE	0.088287	0.089455	-0.0011672	0.516	K2	0.9999
Mpzl1	11	chr1:165592240-165593409	-	TE	0.71264	0.57372	0.13893	0.638	K2	0.9999
Vash2	9	chr1:190947648-190950256	-	TE	0.39163	0.51755	-0.12592	0.609	K1	0.7738
Vash2	10	chr1:190947646-190947647	-	TE	0.60638	0.48384	0.12253	0.617	K1	0.7738
Ahctf1	2	chr1:179799211-179799338	-	CE	0.99402	0.99362	0.00040282	0.517	K0	0
Ahctf1	3	chr1:179795677-179795930	-	CE	0.99581	0.9915	0.0043152	0.679	K2	0.2603
Ahctf1	4	chr1:179794483-179795676	-	AD	0.05007	0.065544	-0.015474	0.647	K2	0.4372
Ahctf1	5	chr1:179793643-179793823	-	CE	0.99684	0.99593	0.00090807	0.56	K0	0
Ahctf1	6	chr1:179792346-179792553	-	CE	0.99568	0.99541	0.00027683	0.544	K0	0
Ahctf1	7	chr1:179790299-179790415	-	CE	0.99364	0.99338	0.00026183	0.507	K0	0
Ahctf1	8	chr1:179789649-179789733	-	CE	0.98854	0.99532	-0.0067861	0.788	K2	0.1492
Ahctf1	9	chr1:179788189-179788339	-	CE	0.98957	0.9955	-0.0059359	0.791	K2	0.1492
Ahctf1	10	chr1:179786968-179787100	-	CE	0.99627	0.99558	0.00068716	0.514	K0	0
Ahctf1	11	chr1:179786695-179786876	-	CE	0.99116	0.99525	-0.0040904	0.699	K1	0.065
Ahctf1	12	chr1:179786070-179786131	-	CE	0.98965	0.99388	-0.0042303	0.689	K1	0.065
Ahctf1	13	chr1:179785008-179785136	-	CE	0.99228	0.99578	-0.0035009	0.69	K1	0.065
Ahctf1	14	chr1:179784090-179784180	-	CE	0.99312	0.99615	-0.0030345	0.678	K1	0.065
Ahctf1	15	chr1:179782947-179783036	-	CE	0.99302	0.99637	-0.0033467	0.717	K1	0.065
Ahctf1	16	chr1:179781643-179781783	-	CE	0.99193	0.9956	-0.0036698	0.687	K1	0.065
Ahctf1	17	chr1:179780856-179780960	-	CE	0.99076	0.99453	-0.0037685	0.685	K1	0.065
Ahctf1	18	chr1:179779604-179779697	-	CE	0.99127	0.99499	-0.0037269	0.686	K1	0.065
Ahctf1	19	chr1:179777700-179777823	-	CE	0.99118	0.99367	-0.0024957	0.636	K1	0.065
Ahctf1	20	chr1:179777503-179777559	-	CE	0.99034	0.98902	0.0013282	0.52	K1	0.0836
Ahctf1	21	chr1:179776008-179776154	-	CE	0.9908	0.99024	0.00055609	0.538	K1	0.0836
Ahctf1	22	chr1:179775332-179775519	-	CE	0.99146	0.99494	-0.0034739	0.684	K1	0.065
Ahctf1	23	chr1:179770799-179770943	-	CE	0.99194	0.99509	-0.0031476	0.649	K1	0.065
Ahctf1	24	chr1:179770589-179770720	-	CE	0.9885	0.99552	-0.007016	0.835	K1	0.065
Ahctf1	25	chr1:179769309-179769459	-	CE	0.99203	0.9949	-0.00287	0.648	K1	0.065
Ahctf1	26	chr1:179768989-179769139	-	CE	0.99583	0.99424	0.0015844	0.571	K0	0
Ahctf1	27	chr1:179768295-179768402	-	CE	0.9948	0.98776	0.0070359	0.703	K1	0.1173
Ahctf1	28	chr1:179765878-179766070	-	CE	0.99432	0.9928	0.0015229	0.524	K0	0
Ahctf1	29	chr1:179763603-179763673	-	AA	0.97207	0.95494	0.017125	0.72	K1	0.3625
Ahctf1	30	chr1:179763470-179763602	-	CE	0.99583	0.99534	0.00048515	0.528	K0	0
Ahctf1	31	chr1:179762899-179762962	-	AA	0.97811	0.95615	0.021964	0.76	K1	0.374
Ahctf1	32	chr1:179762545-179762898	-	CE	0.99593	0.99539	0.0005432	0.561	K0	0
Ahctf1	33	chr1:179760262-179760361	-	CE	0.99363	0.99191	0.0017181	0.545	K0	0
Ahctf1	34	chr1:179758662-179760261	-	AD	0.15795	0.22404	-0.06609	0.687	K1	0.9206
Ahctf1	35	chr1:179757935-179758029	-	CE	0.99225	0.98971	0.0025369	0.574	K0	0
Ahctf1	36	chr1:179755449-179755654	-	CE	0.99434	0.99348	0.00086535	0.532	K0	0
Ahctf1	37	chr1:179754491-179755448	-	AD	0.040964	0.059688	-0.018724	0.693	K1	0.3799
Ahctf1	38	chr1:179752311-179754072	-	CE	0.99503	0.99424	0.00078885	0.554	K0	0
Ahctf1	39	chr1:179748557-179748690	-	CE	0.99436	0.98019	0.01417	0.886	K1	0.1431
Ahctf1	40	chr1:179747180-179747256	-	CE	0.99157	0.99049	0.001087	0.514	K0	0
Ahctf1	41	chr1:179746521-179746528	-	AA	0.96199	0.98398	-0.021984	0.771	K1	0.2317
Scly	2	chr1:91298449-91299469	+	AD	0.23467	0.28274	-0.048068	0.6	K1	0.9955
Scly	3	chr1:91300528-91300640	+	CE	0.97949	0.95407	0.025412	0.661	K0	0
Scly	4	chr1:91302769-91302772	+	AA	0.89711	0.93231	-0.035191	0.696	K1	0.5195
Scly	5	chr1:91302773-91302869	+	CE	0.96975	0.94489	0.024858	0.631	K0	0
Scly	6	chr1:91305274-91305454	+	CE	0.98104	0.9687	0.012342	0.627	K0	0
Scly	7	chr1:91308314-91308441	+	CE	0.98844	0.97763	0.010805	0.623	K0	0
Scly	8	chr1:91308651-91308815	+	CE	0.98829	0.9773	0.010987	0.62	K0	0
Scly	9	chr1:91309797-91309903	+	CE	0.87823	0.86594	0.01229	0.521	K1	0.8324
Scly	10	chr1:91315489-91315525	+	CE	0.98988	0.98058	0.0092976	0.654	K0	0
Scly	11	chr1:91317064-91317147	+	CE	0.98767	0.97483	0.012841	0.678	K0	0
Scly	12	chr1:91317592-91317691	+	CE	0.98284	0.94808	0.034759	0.632	K0	0
Scly	13	chr1:91319038-91319113	+	CE	0.98271	0.96509	0.017614	0.647	K0	0
Zranb3	4	chr1:128101775-128102252	-	AD	0.2736	0.15388	0.11972	0.795	K2	1.491
Zranb3	5	chr1:128091843-128092010	-	CE	0.98279	0.93029	0.052498	0.865	K3	1.7134
Zranb3	6	chr1:128057982-128058000	-	CE	0.92703	0.95134	-0.024307	0.678	K3	1.0151
Zranb3	7	chr1:128040818-128040996	-	CE	0.97322	0.96756	0.0056596	0.574	K0	0
Zranb3	8	chr1:128036398-128036629	-	CE	0.9803	0.97172	0.00858	0.602	K0	0
Zranb3	9	chr1:128032849-128032934	-	CE	0.98236	0.96454	0.017813	0.721	K1	0.2216
Zranb3	10	chr1:128017558-128017729	-	CE	0.97905	0.94617	0.032887	0.725	K1	0.4565
Zranb3	11	chr1:128016043-128016159	-	CE	0.94542	0.9554	-0.0099771	0.558	K0	0
Zranb3	12	chr1:127999461-128008061	-	AA	0.29007	0.18501	0.10506	0.631	K1	0.9848
Zranb3	13	chr1:127999341-127999460	-	CE	0.95389	0.94828	0.0056145	0.536	K0	0
Zranb3	14	chr1:127996853-127996972	-	CE	0.9754	0.96718	0.0082225	0.587	K0	0
Zranb3	15	chr1:127992800-127992979	-	CE	0.98376	0.97843	0.0053251	0.564	K0	0
Zranb3	16	chr1:127987997-127988146	-	CE	0.98472	0.97479	0.0099231	0.604	K0	0
Zranb3	17	chr1:127976139-127976544	-	CE	0.98184	0.97281	0.0090311	0.596	K0	0
Zranb3	18	chr1:127972947-127973144	-	CE	0.97441	0.97361	0.000797	0.555	K0	0
Zranb3	19	chr1:127967878-127967969	-	CE	0.91392	0.95017	-0.036257	0.672	K2	1.1702
Zranb3	20	chr1:127965781-127967877	-	AD	0.11267	0.1402	-0.027524	0.585	K2	1.1702
Zranb3	21	chr1:127965063-127965164	-	CE	0.98218	0.96621	0.015978	0.667	K0	0
Zranb3	22	chr1:127963761-127963903	-	CE	0.97858	0.95738	0.021205	0.661	K0	0
Zranb3	23	chr1:127960759-127960869	-	CE	0.9689	0.94418	0.024715	0.618	K0	0
Zranb3	24	chr1:127959710-127960100	-	CE	0.96898	0.94586	0.02312	0.66	K1	0.3002
Zranb3	25	chr1:127956537-127956668	-	CE	0.96641	0.95912	0.0072837	0.575	K0	0
Zranb3	26	chr1:127955064-127955065	-	AA	0.89499	0.75658	0.13841	0.797	K1	0.8727
Zranb3	27	chr1:127954670-127955063	-	TE	0.0039942	0.0054528	-0.0014586	0.565	K1	0
Zranb3	28	chr1:127954184-127954669	-	TE	0.99594	0.99465	0.0012959	0.572	K1	0
Sulf1	26	chr1:12858812-12860371	+	TE	0.88553	0.35826	0.52727	0.882	K2	0.5819
Sulf1	27	chr1:12860372-12860377	+	TE	0.10976	0.10254	0.0072281	0.535	K2	0.5819
Sulf1	28	chr1:12860378-12861192	+	TE	0.10671	0.64719	-0.54048	0.893	K2	0.5819
Unc50	1	chr1:37430139-37430169	+	TS	0.80169	0.76764	0.034054	0.639	K2	0.8742
Unc50	2	chr1:37430170-37430201	+	TS	0.19118	0.22888	-0.037699	0.637	K2	0.8742
Unc50	3	chr1:37430202-37430282	+	TS	0.021031	0.019115	0.0019162	0.541	K2	0.8742
Unc50	4	chr1:37430283-37430427	+	AD	0.76457	0.75519	0.0093726	0.525	K2	1.6167
Unc50	5	chr1:37430428-37430493	+	AD	0.76252	0.75192	0.010595	0.546	K2	1.6167
Unc50	6	chr1:37431293-37431296	+	AA	0.87376	0.88	-0.0062409	0.52	K2	1.6167
Unc50	7	chr1:37431297-37431576	+	CE	0.99365	0.99231	0.001338	0.545	K0	0
Unc50	8	chr1:37432551-37432671	+	CE	0.99601	0.99599	1.062e-05	0.509	K0	0
Unc50	9	chr1:37437162-37437301	+	CE	0.99586	0.99584	1.8255e-05	0.523	K0	0
Unc50	10	chr1:37437377-37437478	+	CE	0.99604	0.99456	0.0014803	0.54	K0	0
Unc50	11	chr1:37438682-37438984	+	TE	0.92303	0.96766	-0.044629	0.721	K2	0.632
Unc50	12	chr1:37438985-37438987	+	TE	0.075713	0.0024881	0.073225	0.959	K2	0.632
Unc50	13	chr1:37438988-37439124	+	TE	0.0037581	0.032511	-0.028753	0.835	K2	0.632
Prdx6	1	chr1:161251167-161251219	-	TS	0.93352	0.93784	-0.0043182	0.585	K1	0.4116
Prdx6	2	chr1:161251022-161251166	-	TS	0.065382	0.06209	0.0032918	0.529	K1	0.4116
Prdx6	3	chr1:161250994-161251021	-	AD	0.0055803	0.05007	-0.044489	0.93	K2	0.5599
Prdx6	4	chr1:161250757-161250993	-	AD	0.0055722	0.022703	-0.017131	0.735	K2	0.5196
Prdx6	5	chr1:161249359-161249469	-	CE	0.017807	0.037915	-0.020108	0.764	K2	0.3513
Prdx6	6	chr1:161247257-161247413	-	CE	0.98361	0.99756	-0.01395	0.892	K1	0.1915
Prdx6	7	chr1:161244196-161244342	-	CE	0.99836	0.99812	0.00023693	0.501	K0	0
Prdx6	8	chr1:161243575-161243721	-	CE	0.99831	0.99811	0.00019912	0.518	K0	0
Prdx6	9	chr1:161241598-161241849	-	TE	0.45167	0.46733	-0.015666	0.565	K1	0.9984
Prdx6	10	chr1:161240112-161241597	-	TE	0.54888	0.53235	0.016533	0.586	K1	0.9984
Slamf7	4	chr1:171648928-171648939	-	TS	0.074602	0.10153	-0.026925	0.611	K1	0
Slamf7	5	chr1:171648873-171648927	-	TS	0.92511	0.89882	0.026291	0.603	K1	0
Slamf7	6	chr1:171640956-171641267	-	CE	0.95541	0.95721	-0.0017994	0.518	K0	0
Slamf7	7	chr1:171638996-171639268	-	CE	0.91894	0.94704	-0.0281	0.532	K0	0
Slamf7	8	chr1:171638663-171638785	-	CE	0.94058	0.71617	0.22441	0.944	K1	0.8208
Slamf7	9	chr1:171637297-171637400	-	CE	0.89511	0.86812	0.026994	0.57	K0	0
Slamf7	10	chr1:171636312-171636374	-	CE	0.88382	0.88006	0.0037553	0.503	K0	0
Slamf7	11	chr1:171636229-171636311	-	TE	0.10765	0.11524	-0.0075858	0.521	K1	0
Slamf7	12	chr1:171635718-171636228	-	TE	0.89096	0.88299	0.0079747	0.511	K1	0
Slamf7	13	chr1:171634925-171634996	-	TE	0.010207	0.32445	-0.31424	0.552	K2	0.9963
Slamf7	14	chr1:171634474-171634924	-	TE	0.23188	0.26979	-0.03791	0.555	K2	0.9963
Slamf7	15	chr1:171632403-171634473	-	TE	0.76946	0.41731	0.35215	0.865	K2	0.9963
Cacybp	2	chr1:160208379-160208595	-	CE	0.99665	0.99592	0.00072269	0.521	K0	0
Cacybp	3	chr1:160206613-160206709	-	CE	0.99758	0.99667	0.00090463	0.528	K0	0
Cacybp	4	chr1:160206097-160206195	-	CE	0.99553	0.99378	0.0017583	0.523	K0	0
Cacybp	5	chr1:160206096-160206096	-	AD	0.993	0.9906	0.002397	0.572	K0	0
Cacybp	6	chr1:160205066-160206095	-	AA	0.069136	0.1203	-0.051167	0.692	K1	0.7077
Cacybp	7	chr1:160204968-160205065	-	CE	0.99637	0.9952	0.0011737	0.51	K0	0
Pdcl3	2	chr1:38991246-38991375	+	CE	0.98066	0.98652	-0.0058526	0.589	K1	0.2025
Pdcl3	3	chr1:38994915-38995005	+	CE	0.99635	0.99495	0.0014044	0.557	K0	0
Pdcl3	4	chr1:38995245-38995388	+	CE	0.99598	0.99442	0.0015643	0.562	K0	0
Pdcl3	5	chr1:38995735-38995943	+	CE	0.99613	0.9944	0.0017285	0.552	K0	0
Degs1	2	chr1:182282379-182282621	-	AD	0.022786	0.054801	-0.032015	0.852	K1	0.3644
Degs1	3	chr1:182278976-182279718	-	CE	0.99723	0.99686	0.00037271	0.542	K0	0
Degs1	4	chr1:182278013-182278975	-	AD	0.064246	0.064193	5.3493e-05	0.561	K1	0.4367
1700034H15Rik	1	chr1:191907520-191907527	-	TS	0.95347	0.65894	0.29453	0.534	K1	0
1700034H15Rik	2	chr1:191907060-191907519	-	TS	0.045747	0.34038	-0.29464	0.527	K1	0
Dhx9	1	chr1:153487609-153487660	-	TS	0.20411	0.019092	0.18502	0.954	K1	0.9361
Dhx9	2	chr1:153487533-153487608	-	TS	0.79605	0.98107	-0.18502	0.948	K1	0.9361
Dhx9	3	chr1:153483740-153483872	-	CE	0.99881	0.99756	0.0012479	0.69	K1	0.0399
Dhx9	4	chr1:153482742-153482882	-	CE	0.99864	0.99748	0.0011531	0.656	K1	0.0399
Dhx9	5	chr1:153481132-153481249	-	CE	0.99807	0.99821	-0.00014038	0.508	K0	0
Dhx9	6	chr1:153478979-153478981	-	AA	0.85783	0.85327	0.0045635	0.509	K1	0.6881
Dhx9	7	chr1:153478866-153478978	-	CE	0.9987	0.99869	1.1099e-05	0.501	K0	0
Dhx9	8	chr1:153478061-153478189	-	CE	0.99879	0.99888	-9.8134e-05	0.531	K0	0
Dhx9	9	chr1:153478041-153478060	-	AD	0.99399	0.99509	-0.0010985	0.618	K2	0.8885
Dhx9	10	chr1:153476424-153476562	-	CE	0.23698	0.27004	-0.033068	0.73	K2	0.8911
Dhx9	11	chr1:153475663-153475709	-	CE	0.99805	0.99795	9.7011e-05	0.505	K0	0
Dhx9	12	chr1:153473147-153473283	-	CE	0.99782	0.99788	-6.1287e-05	0.503	K0	0
Dhx9	13	chr1:153472672-153472761	-	CE	0.99812	0.99821	-8.0972e-05	0.516	K0	0
Dhx9	14	chr1:153472401-153472562	-	CE	0.99865	0.99872	-7.6033e-05	0.526	K0	0
Dhx9	15	chr1:153472226-153472303	-	CE	0.9989	0.99892	-2.3516e-05	0.502	K0	0
Dhx9	16	chr1:153471620-153471811	-	CE	0.99846	0.99853	-7.3914e-05	0.501	K0	0
Dhx9	17	chr1:153469737-153469741	-	AA	0.98703	0.99076	-0.0037305	0.727	K1	0.1279
Dhx9	18	chr1:153469600-153469736	-	CE	0.99771	0.99749	0.00021528	0.525	K0	0
Dhx9	19	chr1:153468874-153468956	-	CE	0.99809	0.99819	-0.00010297	0.513	K0	0
Dhx9	20	chr1:153467032-153467188	-	CE	0.99865	0.99896	-0.00030848	0.554	K0	0
Dhx9	21	chr1:153465677-153465777	-	CE	0.99908	0.9992	-0.0001218	0.541	K0	0
Dhx9	22	chr1:153464855-153465068	-	CE	0.99892	0.99898	-6.5709e-05	0.508	K0	0
Dhx9	23	chr1:153464618-153464712	-	CE	0.99811	0.99814	-2.7591e-05	0.501	K0	0
Dhx9	24	chr1:153464340-153464413	-	CE	0.99836	0.99865	-0.00028286	0.539	K0	0
Dhx9	25	chr1:153462552-153462704	-	CE	0.99821	0.99855	-0.00033372	0.54	K0	0
Dhx9	26	chr1:153461138-153461142	-	AA	0.9967	0.99468	0.0020201	0.593	K1	0.0656
Dhx9	27	chr1:153460982-153461137	-	CE	0.99824	0.99841	-0.00017404	0.519	K0	0
Dhx9	28	chr1:153460278-153460389	-	CE	0.99892	0.99738	0.0015344	0.704	K1	0.0401
Dhx9	29	chr1:153459558-153459719	-	CE	0.99886	0.99745	0.0014067	0.711	K1	0.0401
Dhx9	30	chr1:153459338-153459465	-	CE	0.99842	0.99735	0.0010676	0.642	K1	0.0401
Dhx9	31	chr1:153458260-153458489	-	CE	0.99758	0.99782	-0.0002436	0.522	K0	0
Dhx9	32	chr1:153458053-153458168	-	CE	0.99713	0.99713	6.9044e-06	0.519	K0	0
Dhx9	33	chr1:153457536-153457731	-	CE	0.99448	0.99421	0.00026707	0.513	K0	0
Dhx9	34	chr1:153457531-153457535	-	AD	0.9753	0.98302	-0.007723	0.632	K1	0.1546
Aida	1	chr1:183297049-183297404	+	TS	0.32878	0.17018	0.1586	0.772	K1	0.9992
Aida	2	chr1:183297405-183297628	+	TS	0.67179	0.83036	-0.15857	0.768	K1	0.9992
Aida	3	chr1:183297629-183297924	+	AD	0.10802	0.1815	-0.073485	0.814	K2	0.8
Aida	4	chr1:183304678-183304747	+	CE	0.98848	0.97858	0.0098976	0.652	K2	0.723
Aida	5	chr1:183306424-183306477	+	CE	0.99073	0.98841	0.00232	0.551	K0	0
Aida	6	chr1:183306885-183306939	+	CE	0.96542	0.96827	-0.0028442	0.633	K1	0.3123
Aida	7	chr1:183313661-183313724	+	CE	0.99088	0.98609	0.0047885	0.578	K0	0
Aida	8	chr1:183313979-183314082	+	CE	0.99179	0.98396	0.0078257	0.667	K0	0
Aida	9	chr1:183316580-183316702	+	CE	0.98134	0.97003	0.011316	0.603	K0	0
Aida	10	chr1:183318812-183318934	+	CE	0.86723	0.94796	-0.08073	0.742	K1	0.7177
Aida	11	chr1:183320071-183320222	+	CE	0.45179	0.57604	-0.12425	0.672	K2	1.3655
Aida	12	chr1:183320223-183320341	+	AD	0.44587	0.57786	-0.13199	0.658	K2	1.3655
Aida	13	chr1:183322284-183322401	+	CE	0.97012	0.95973	0.010394	0.594	K0	0
Aida	14	chr1:183322489-183323609	+	TE	0.78849	0.74869	0.039808	0.767	K1	0.9037
Aida	15	chr1:183323610-183325476	+	TE	0.21108	0.25174	-0.040654	0.768	K1	0.9037
Orc2	2	chr1:58504629-58504771	-	AD	0.11717	0.16197	-0.044796	0.596	K2	1.3945
Orc2	3	chr1:58501885-58501890	-	AA	0.70085	0.86482	-0.16397	0.902	K1	0.8968
Orc2	4	chr1:58501842-58501884	-	CE	0.98717	0.98462	0.0025501	0.542	K0	0
Orc2	7	chr1:58500241-58500384	-	CE	0.98702	0.98683	0.00019585	0.524	K1	0.1696
Orc2	8	chr1:58497376-58497465	-	CE	0.99571	0.99476	0.00094588	0.547	K0	0
Orc2	9	chr1:58493661-58493750	-	CE	0.99503	0.99364	0.0013935	0.561	K0	0
Orc2	10	chr1:58492857-58492888	-	CE	0.99358	0.98952	0.0040587	0.544	K0	0
Orc2	11	chr1:58483643-58483703	-	CE	0.99033	0.98573	0.004604	0.551	K0	0
Orc2	12	chr1:58481823-58483642	-	AD	0.046127	0.15485	-0.10872	0.799	K1	0.7988
Orc2	13	chr1:58480960-58481153	-	CE	0.99266	0.98668	0.0059822	0.587	K0	0
Orc2	14	chr1:58480251-58480349	-	CE	0.99551	0.99321	0.0022939	0.57	K0	0
Orc2	15	chr1:58476434-58476543	-	CE	0.97842	0.99479	-0.016367	0.827	K1	0.2189
Orc2	16	chr1:58474809-58474941	-	CE	0.99469	0.9872	0.0074909	0.727	K1	0.141
Orc2	17	chr1:58472305-58472401	-	CE	0.99368	0.99102	0.0026607	0.587	K0	0
Orc2	18	chr1:58470940-58471086	-	CE	0.99393	0.99034	0.0035925	0.599	K0	0
Orc2	19	chr1:58469668-58469839	-	CE	0.99469	0.99294	0.0017511	0.563	K0	0
Orc2	20	chr1:58467651-58467712	-	CE	0.96542	0.99168	-0.026254	0.866	K1	0.3157
Orc2	21	chr1:58465995-58466113	-	CE	0.99433	0.99196	0.0023713	0.539	K0	0
Orc2	22	chr1:58465521-58465994	-	AD	0.027495	0.068152	-0.040657	0.833	K1	0.431
Orc2	23	chr1:58464204-58464290	-	TE	0.77325	0.67867	0.094577	0.785	K1	0.9949
Orc2	24	chr1:58462771-58464203	-	TE	0.22599	0.32194	-0.095958	0.783	K1	0.9949
Fbxo28	2	chr1:182329874-182329983	-	CE	0.99621	0.99454	0.0016696	0.589	K0	0
Fbxo28	3	chr1:182326254-182326392	-	CE	0.99564	0.99315	0.0024889	0.599	K0	0
Fbxo28	4	chr1:182317959-182318005	-	AA	0.95047	0.96866	-0.018185	0.777	K1	0.2683
Fbxo28	5	chr1:182317810-182317958	-	CE	0.99618	0.99507	0.0011137	0.547	K0	0
A630095N17Rik	4	chr1:75220256-75220573	-	TE	0.40485	0.32883	0.076026	0.638	K1	0.9943
A630095N17Rik	5	chr1:75220095-75220255	-	TE	0.60232	0.67173	-0.069408	0.614	K1	0.9943
R3hdm1	2	chr1:128151744-128151952	+	CE	0.99299	0.99467	-0.0016785	0.549	K0	0
R3hdm1	3	chr1:128153189-128153399	+	CE	0.99381	0.99553	-0.0017289	0.547	K0	0
R3hdm1	4	chr1:128162202-128162243	+	CE	0.045411	0.034121	0.01129	0.687	K4	1.5199
R3hdm1	5	chr1:128162769-128162858	+	CE	0.060747	0.09249	-0.031744	0.741	K4	1.5199
R3hdm1	6	chr1:128167893-128168007	+	CE	0.95849	0.96213	-0.0036377	0.644	K4	1.5199
R3hdm1	7	chr1:128168979-128169057	+	CE	0.89087	0.92776	-0.036885	0.725	K4	1.7114
R3hdm1	8	chr1:128174949-128174998	+	CE	0.91889	0.90349	0.015401	0.562	K4	1.7114
R3hdm1	9	chr1:128174999-128175008	+	AD	0.87592	0.85056	0.025365	0.6	K4	1.5199
R3hdm1	10	chr1:128175092-128175232	+	CE	0.99054	0.99045	9.188e-05	0.501	K0	0
R3hdm1	11	chr1:128176824-128176956	+	CE	0.23761	0.21129	0.026313	0.646	K1	0.8248
R3hdm1	12	chr1:128178883-128178991	+	CE	0.99561	0.99577	-0.00016277	0.511	K0	0
R3hdm1	13	chr1:128179087-128179182	+	CE	0.99632	0.99627	4.5088e-05	0.533	K0	0
R3hdm1	14	chr1:128181717-128181754	+	CE	0.99309	0.9933	-0.00020066	0.506	K0	0
R3hdm1	15	chr1:128181838-128181888	+	CE	0.98807	0.94041	0.047665	0.966	K1	0.3333
R3hdm1	16	chr1:128181986-128182164	+	CE	0.98294	0.98625	-0.0033098	0.55	K0	0
R3hdm1	17	chr1:128182165-128182212	+	AD	0.77109	0.72536	0.045731	0.633	K2	1.6686
R3hdm1	18	chr1:128184400-128184654	+	CE	0.78236	0.74191	0.040448	0.653	K2	1.6686
R3hdm1	19	chr1:128186758-128186909	+	CE	0.98557	0.98561	-3.9416e-05	0.51	K0	0
R3hdm1	21	chr1:128190638-128190739	+	CE	0.12627	0.16868	-0.042413	0.593	K1	0.806
R3hdm1	22	chr1:128193460-128193756	+	CE	0.97881	0.97245	0.0063525	0.507	K0	0
R3hdm1	23	chr1:128196974-128197097	+	CE	0.98467	0.98399	0.00068009	0.504	K0	0
R3hdm1	24	chr1:128211205-128211359	+	CE	0.98666	0.98657	9.2846e-05	0.512	K0	0
R3hdm1	25	chr1:128216401-128216552	+	CE	0.98743	0.98727	0.00016589	0.503	K0	0
R3hdm1	26	chr1:128221600-128221703	+	CE	0.98661	0.98711	-0.0004941	0.503	K0	0
R3hdm1	27	chr1:128223469-128223641	+	CE	0.98456	0.9846	-3.6831e-05	0.501	K0	0
R3hdm1	28	chr1:128231323-128231467	+	CE	0.98499	0.98642	-0.001429	0.53	K0	0
R3hdm1	29	chr1:128235066-128235148	+	CE	0.98838	0.98987	-0.0014913	0.539	K0	0
R3hdm1	30	chr1:128235542-128235626	+	CE	0.98968	0.99108	-0.001401	0.504	K0	0
Ppp1r12b	1	chr1:134955941-134955942	-	TS	0.0082495	0.010007	-0.0017571	0.542	K2	0.0043
Ppp1r12b	2	chr1:134955852-134955940	-	TS	0.99109	0.9899	0.0011973	0.544	K2	0.0043
Ppp1r12b	3	chr1:134955492-134955851	-	TS	0.0088932	0.010142	-0.0012488	0.524	K2	0.0043
Ppp1r12b	4	chr1:134948996-134949037	-	CE	0.028892	0.054267	-0.025375	0.705	K2	0.6222
Ppp1r12b	5	chr1:134947943-134948277	-	AL	0.029868	0.033678	-0.0038097	0.539	K0	0
Ppp1r12b	6	chr1:134902378-134902508	-	CE	0.87525	0.87262	0.0026349	0.524	K2	0.6768
Ppp1r12b	7	chr1:134896343-134896461	-	CE	0.97808	0.97239	0.0056905	0.597	K2	0.6251
Ppp1r12b	8	chr1:134893350-134893509	-	CE	0.98812	0.98338	0.0047431	0.566	K0	0
Ppp1r12b	9	chr1:134892158-134892302	-	CE	0.9856	0.98101	0.0045913	0.578	K0	0
Ppp1r12b	10	chr1:134890756-134890830	-	CE	0.9866	0.9854	0.0012055	0.532	K0	0
Ppp1r12b	11	chr1:134887275-134887354	-	CE	0.99027	0.98922	0.0010477	0.534	K0	0
Ppp1r12b	12	chr1:134886423-134886562	-	CE	0.99002	0.98745	0.0025665	0.575	K0	0
Ppp1r12b	13	chr1:134879633-134879745	-	CE	0.98368	0.98242	0.0012567	0.514	K0	0
Ppp1r12b	14	chr1:134875965-134876165	-	CE	0.9832	0.98211	0.0010912	0.535	K0	0
Ppp1r12b	15	chr1:134873939-134874021	-	CE	0.98686	0.98507	0.0017803	0.511	K0	0
Ppp1r12b	16	chr1:134872807-134872932	-	CE	0.98423	0.98285	0.0013764	0.524	K0	0
Ppp1r12b	17	chr1:134870068-134872310	-	CE	0.56889	0.84863	-0.27975	0.975	K1	0.9953
Ppp1r12b	18	chr1:134865778-134865960	-	CE	0.98068	0.97929	0.0013875	0.508	K0	0
Ppp1r12b	19	chr1:134842643-134842733	-	CE	0.96407	0.96096	0.0031115	0.507	K0	0
Ppp1r12b	20	chr1:134837853-134838041	-	CE	0.96892	0.9705	-0.0015786	0.501	K0	0
Ppp1r12b	21	chr1:134835978-134836167	-	CE	0.97591	0.97973	-0.0038205	0.535	K0	0
Ppp1r12b	22	chr1:134835785-134835897	-	CE	0.96283	0.96962	-0.0067885	0.561	K0	0
Ppp1r12b	23	chr1:134834435-134834476	-	CE	0.94762	0.96739	-0.019761	0.6	K0	0
Ppp1r12b	24	chr1:134782151-134782167	-	CE	0.95594	0.96526	-0.0093184	0.539	K1	0.2391
Ppp1r12b	25	chr1:134777315-134777459	-	CE	0.96292	0.9782	-0.015281	0.638	K0	0
Ppp1r12b	26	chr1:134776376-134776480	-	CE	0.97224	0.97056	0.0016765	0.518	K0	0
Ppp1r12b	27	chr1:134773477-134773479	-	AA	0.94855	0.92684	0.021708	0.643	K1	0.3733
Ppp1r12b	28	chr1:134773426-134773476	-	CE	0.97352	0.97222	0.0012996	0.516	K0	0
Ppp1r12b	29	chr1:134771998-134772048	-	CE	0.97703	0.97752	-0.00048145	0.516	K0	0
Ppp1r12b	32	chr1:134759969-134760495	-	TE	0.031431	0.030747	0.00068384	0.567	K1	0.4334
Ppp1r12b	33	chr1:134754658-134759968	-	TE	0.96849	0.96931	-0.00082189	0.558	K1	0.4334
Gm38394	3	chr1:133661237-133661255	-	AD	0.87978	0.86567	0.014111	0.503	K0	0
Gm38394	4	chr1:133657456-133661236	-	AD	0.97378	0.96711	0.0066665	0.589	K1	0.1436
Gm38394	5	chr1:133657389-133657455	-	AD	0.98542	0.97909	0.0063357	0.667	K3	1.0939
Gm38394	6	chr1:133655399-133657388	-	RI	0.98567	0.97678	0.008885	0.721	K3	1.0939
Gm38394	7	chr1:133655345-133655398	-	CE	0.98565	0.98584	-0.00018419	0.517	K2	0.1433
Gm38394	8	chr1:133655334-133655344	-	AD	0.073183	0.14217	-0.068983	0.686	K1	0.7349
Gm38394	9	chr1:133654033-133654438	-	AA	0.69305	0.4871	0.20595	0.781	K2	1.3
Gm38394	10	chr1:133653973-133654032	-	CE	0.9783	0.98314	-0.0048394	0.532	K0	0
Gm38394	11	chr1:133647336-133647529	-	CE	0.97825	0.98279	-0.0045427	0.56	K0	0
Gm38394	12	chr1:133645727-133645846	-	CE	0.98024	0.98538	-0.0051447	0.605	K0	0
Gm38394	13	chr1:133640612-133640735	-	CE	0.98454	0.98889	-0.0043541	0.594	K0	0
Gm38394	14	chr1:133639040-133639243	-	CE	0.98408	0.9882	-0.0041192	0.566	K0	0
Gm38394	15	chr1:133638833-133638949	-	CE	0.97982	0.98389	-0.0040784	0.522	K0	0
Gm38394	16	chr1:133638533-133638613	-	CE	0.97722	0.98255	-0.005334	0.555	K0	0
Gm38394	17	chr1:133637457-133637459	-	AA	0.86162	0.88733	-0.025716	0.657	K1	0.5533
Gm38394	18	chr1:133637349-133637456	-	CE	0.98253	0.98648	-0.003955	0.55	K0	0
Gm38394	19	chr1:133636054-133636056	-	AA	0.95826	0.9762	-0.017939	0.751	K3	0.3478
Gm38394	20	chr1:133635997-133636053	-	CE	0.98524	0.98146	0.0037861	0.559	K2	0.2792
Gm38394	21	chr1:133634275-133635996	-	AD	0.062651	0.053754	0.0088969	0.537	K1	0.3294
Gm38394	22	chr1:133633762-133633860	-	CE	0.98597	0.98834	-0.0023754	0.541	K0	0
Gm38394	23	chr1:133626767-133627270	-	CE	0.98567	0.98904	-0.0033762	0.539	K0	0
Gm38394	24	chr1:133625848-133625930	-	CE	0.9854	0.98817	-0.0027699	0.552	K0	0
Gm38394	25	chr1:133624771-133624810	-	AA	0.98277	0.98618	-0.0034106	0.553	K0	0
Gm38394	26	chr1:133624483-133624770	-	CE	0.97759	0.98221	-0.0046215	0.535	K0	0
Gm38394	27	chr1:133622984-133623150	-	CE	0.97881	0.98093	-0.0021161	0.502	K0	0
Gm38394	28	chr1:133622117-133622184	-	CE	0.98044	0.9827	-0.002262	0.545	K0	0
Cd247	1	chr1:165788681-165788688	+	TS	0.0025565	0.0022535	0.00030294	0.517	K2	0.2191
Cd247	2	chr1:165788689-165788722	+	TS	0.96745	0.9672	0.0002426	0.524	K2	0.2191
Cd247	3	chr1:165788723-165788764	+	TS	0.031079	0.031848	-0.00076903	0.52	K2	0.2191
Cd247	4	chr1:165788765-165788777	+	TS	0.003757	0.0028084	0.00094863	0.593	K2	0.2191
Cd247	5	chr1:165788778-165788886	+	CE	0.99819	0.99862	-0.00043658	0.551	K0	0
Cd247	6	chr1:165788887-165825914	+	AD	0.59135	0.41576	0.17559	0.777	K2	0.9771
Cd247	7	chr1:165855166-165855269	+	CE	0.99865	0.99721	0.0014357	0.671	K2	0.0806
Cd247	8	chr1:165856400-165856456	+	CE	0.99674	0.99639	0.00035168	0.627	K2	0.0806
Cd247	9	chr1:165857416-165857496	+	CE	0.99927	0.99939	-0.00011316	0.563	K0	0
Cd247	10	chr1:165858443-165858445	+	AA	0.89301	0.89284	0.00016856	0.501	K2	0.5798
Cd247	11	chr1:165858446-165858478	+	CE	0.99931	0.99671	0.0026083	0.896	K2	0.5798
Cd247	12	chr1:165859219-165859275	+	CE	0.9992	0.99934	-0.0001323	0.551	K0	0
Cd247	13	chr1:165859789-165859824	+	CE	0.99902	0.99813	0.00088721	0.594	K2	0.1026
Cd247	14	chr1:165861004-165862066	+	AL	0.99418	0.99388	0.00030268	0.524	K2	0.1026
Cd247	15	chr1:165866655-165866748	+	CE	0.96937	0.95196	0.017406	0.643	K0	0
Cd247	16	chr1:165866749-165866898	+	AD	0.98081	0.97749	0.0033197	0.532	K0	0
Cd247	18	chr1:165869018-165870249	+	TE	0.0013688	0.0017625	-0.00039371	0.57	K1	0
Cd247	19	chr1:165870250-165871153	+	TE	0.9986	0.99822	0.00038022	0.569	K1	0
Cops7b	4	chr1:86589164-86589341	+	CE	0.97235	0.9595	0.012845	0.56	K2	1.176
Cops7b	5	chr1:86592291-86592366	+	CE	0.99006	0.98734	0.0027226	0.557	K0	0
Cops7b	6	chr1:86596751-86596839	+	CE	0.95184	0.97194	-0.0201	0.733	K1	0.3309
Cops7b	7	chr1:86599003-86599205	+	CE	0.99269	0.99002	0.0026634	0.55	K0	0
Cops7b	8	chr1:86601083-86601188	+	CE	0.98983	0.98568	0.0041452	0.554	K0	0
Cops7b	9	chr1:86605058-86606500	+	TE	0.92413	0.89605	0.028073	0.714	K1	0.5795
Cops7b	10	chr1:86606501-86609375	+	TE	0.076168	0.10377	-0.027598	0.702	K1	0.5795
Rftn2	3	chr1:55214120-55214303	-	CE	0.75267	0.91311	-0.16044	0.77	K1	0.9305
Rftn2	4	chr1:55211150-55211261	-	CE	0.91787	0.92856	-0.010693	0.541	K0	0
Rftn2	5	chr1:55206336-55206615	-	CE	0.9174	0.88223	0.035172	0.613	K0	0
Rftn2	6	chr1:55204183-55204392	-	CE	0.91993	0.92428	-0.0043556	0.524	K0	0
Rftn2	7	chr1:55201651-55202214	-	AL	0.104	0.13255	-0.028548	0.597	K0	0
Rftn2	8	chr1:55201345-55201422	-	CE	0.31652	0.44258	-0.12606	0.73	K1	0.9854
Rftn2	9	chr1:55195516-55195637	-	CE	0.92667	0.93532	-0.0086462	0.544	K0	0
Rftn2	10	chr1:55194244-55194347	-	CE	0.85958	0.9092	-0.04962	0.616	K0	0
Rftn2	11	chr1:55184950-55185028	-	CE	0.89111	0.87909	0.012027	0.538	K0	0
Usp40	1	chr1:88008535-88008551	-	TS	0.85664	0.8045	0.052136	0.697	K1	0.7496
Usp40	2	chr1:88008438-88008534	-	TS	0.14373	0.19335	-0.049614	0.677	K1	0.7496
Usp40	3	chr1:88007225-88007442	-	CE	0.97441	0.97728	-0.0028637	0.553	K0	0
Usp40	4	chr1:88004247-88004314	-	CE	0.98018	0.92398	0.056201	0.869	K1	0.421
Usp40	5	chr1:88002409-88002522	-	CE	0.98516	0.9842	0.00095888	0.509	K0	0
Usp40	6	chr1:88002305-88002408	-	AD	0.043942	0.064381	-0.020439	0.568	K1	0.5519
Usp40	7	chr1:87999740-87999904	-	CE	0.98494	0.98533	-0.00039129	0.514	K0	0
Usp40	8	chr1:87997813-87997959	-	CE	0.98545	0.98331	0.0021471	0.538	K0	0
Usp40	9	chr1:87995842-87995854	-	CE	0.98472	0.97605	0.0086742	0.635	K0	0
Usp40	10	chr1:87995711-87995841	-	AD	0.98115	0.97587	0.0052841	0.546	K0	0
Usp40	11	chr1:87994174-87994302	-	CE	0.98776	0.98716	0.00060351	0.506	K0	0
Usp40	12	chr1:87990062-87990157	-	CE	0.98984	0.98791	0.0019321	0.528	K0	0
Usp40	13	chr1:87988885-87988992	-	CE	0.98699	0.98644	0.00054453	0.543	K0	0
Usp40	14	chr1:87985902-87986199	-	CE	0.98591	0.98518	0.00072295	0.507	K0	0
Usp40	15	chr1:87983754-87983835	-	CE	0.9844	0.97986	0.0045378	0.583	K0	0
Usp40	16	chr1:87982009-87982180	-	CE	0.98626	0.9819	0.0043583	0.546	K0	0
Usp40	17	chr1:87980971-87981055	-	CE	0.99095	0.98849	0.0024552	0.546	K0	0
Usp40	18	chr1:87980015-87980085	-	CE	0.98983	0.98876	0.0010756	0.519	K0	0
Usp40	19	chr1:87978311-87978633	-	CE	0.98276	0.98313	-0.00036439	0.505	K0	0
Usp40	20	chr1:87975808-87975931	-	CE	0.978	0.96887	0.0091318	0.586	K0	0
Usp40	21	chr1:87974077-87974134	-	CE	0.838	0.88203	-0.044024	0.698	K2	1.4876
Usp40	22	chr1:87968396-87968449	-	CE	0.76343	0.71361	0.04982	0.524	K2	1.4876
Usp40	23	chr1:87967510-87967598	-	CE	0.97997	0.96751	0.012452	0.595	K0	0
Usp40	24	chr1:87967184-87967270	-	CE	0.97854	0.97135	0.0071877	0.524	K0	0
Usp40	25	chr1:87965306-87965342	-	CE	0.98044	0.972	0.0084458	0.563	K0	0
Usp40	26	chr1:87962424-87962488	-	CE	0.98421	0.97636	0.0078453	0.615	K0	0
Usp40	27	chr1:87959864-87959893	-	AA	0.17235	0.26229	-0.089934	0.724	K1	0.9191
Usp40	28	chr1:87959789-87959863	-	CE	0.9832	0.98085	0.0023505	0.529	K0	0
Usp40	29	chr1:87957211-87957334	-	CE	0.98112	0.97316	0.0079609	0.586	K0	0
Usp40	30	chr1:87954151-87954245	-	CE	0.97166	0.95512	0.016539	0.566	K0	0
Usp40	31	chr1:87952340-87952458	-	CE	0.97733	0.95039	0.026935	0.565	K0	0
Usp40	32	chr1:87951643-87951708	-	CE	0.97848	0.95464	0.023844	0.658	K0	0
Usp40	33	chr1:87950159-87950369	-	CE	0.97662	0.97294	0.0036738	0.541	K0	0
Usp40	34	chr1:87949932-87950027	-	CE	0.97494	0.97699	-0.0020437	0.577	K0	0
Usp40	35	chr1:87948502-87948596	-	CE	0.96966	0.96518	0.0044791	0.563	K0	0
Usp40	36	chr1:87946443-87946707	-	TE	0.0017631	0.0013098	0.00045327	0.573	K1	0
Usp40	37	chr1:87945121-87946442	-	TE	0.9983	0.99864	-0.00033884	0.557	K1	0
Ptprn	12	chr1:75254585-75254649	-	CE	0.86195	0.74175	0.1202	0.659	K1	0.9879
Cnih4	2	chr1:181150931-181151061	+	AF	0.94997	0.96861	-0.018634	0.604	K2	0.5222
Cnih4	3	chr1:181153735-181153803	+	CE	0.95835	0.98069	-0.022334	0.656	K2	0.5222
Cnih4	4	chr1:181153804-181154904	+	AD	0.034143	0.099394	-0.065251	0.856	K2	0.6175
Cnih4	5	chr1:181155859-181155971	+	CE	0.99436	0.99096	0.0034016	0.54	K0	0
Cnih4	6	chr1:181162075-181162215	+	CE	0.99365	0.98998	0.0036661	0.54	K0	0
Cnih4	7	chr1:181166181-181166248	+	TE	0.45435	0.86457	-0.41022	0.611	K1	0.7373
Cnih4	8	chr1:181166249-181168994	+	TE	0.54559	0.13612	0.40947	0.648	K1	0.7373
Klf7	1	chr1:64121483-64121491	-	TS	0.38223	0.39569	-0.01346	0.513	K1	0.8462
Klf7	2	chr1:64121386-64121482	-	TS	0.61386	0.60316	0.010699	0.549	K1	0.8462
Klf7	3	chr1:64121140-64121385	-	RI	0.76544	0.75947	0.0059693	0.536	K2	0.9448
Klf7	4	chr1:64120900-64121139	-	CE	0.98615	0.9857	0.00044826	0.501	K3	0.7852
Klf7	5	chr1:64078707-64079334	-	CE	0.98367	0.97539	0.0082841	0.657	K3	0.7852
Klf7	6	chr1:64042314-64042437	-	CE	0.98378	0.99004	-0.0062602	0.621	K0	0
Nav1	35	chr1:135438848-135441779	-	TE	0.58249	0.70569	-0.12319	0.836	K1	0.9989
Nav1	36	chr1:135434580-135438847	-	TE	0.41871	0.29429	0.12442	0.805	K1	0.9989
A130010J15Rik	5	chr1:193173577-193173579	+	TS	0.060449	0.3682	-0.30775	0.521	K1	0
A130010J15Rik	6	chr1:193173580-193173770	+	TS	0.93731	0.63349	0.30382	0.532	K1	0
A130010J15Rik	7	chr1:193173771-193173780	+	AD	0.88869	0.78081	0.10787	0.755	K2	1.4388
A130010J15Rik	9	chr1:193174245-193176298	+	TE	0.25743	0.24005	0.017377	0.514	K2	1.395
A130010J15Rik	10	chr1:193176299-193176300	+	TE	0.341	0.26948	0.071517	0.626	K2	1.395
A130010J15Rik	11	chr1:193176301-193177832	+	TE	0.40234	0.49116	-0.088813	0.714	K2	1.395
Gm15832	2	chr1:39548926-39549116	-	CE	0.91175	0.93698	-0.025234	0.585	K0	0
Nif3l1	1	chr1:58445151-58445266	+	TS	0.14907	0.1582	-0.0091334	0.519	K1	0.7905
Nif3l1	2	chr1:58445267-58445634	+	TS	0.85068	0.84137	0.0093091	0.539	K1	0.7905
Nif3l1	4	chr1:58447634-58448089	+	CE	0.97321	0.97938	-0.0061732	0.636	K2	0.4247
Nif3l1	5	chr1:58450387-58450549	+	CE	0.98547	0.98187	0.0036001	0.519	K0	0
Nif3l1	6	chr1:58452089-58452215	+	CE	0.98618	0.98161	0.0045729	0.563	K0	0
Nif3l1	7	chr1:58455597-58455735	+	CE	0.9879	0.97079	0.017102	0.657	K2	0.3925
Nif3l1	8	chr1:58457780-58457863	+	CE	0.96545	0.89686	0.06859	0.689	K2	0.7245
Nif3l1	9	chr1:58461141-58462266	+	TE	0.34823	0.40411	-0.055878	0.722	K1	0.9897
Nif3l1	10	chr1:58462267-58463456	+	TE	0.65153	0.59545	0.056073	0.721	K1	0.9897
BC094916	2	chr1:173529274-173529555	-	CE	0.97946	0.98352	-0.0040651	0.566	K0	0
BC094916	3	chr1:173527842-173527978	-	CE	0.95593	0.96484	-0.0089038	0.591	K0	0
BC094916	4	chr1:173526464-173526703	-	CE	0.96207	0.95906	0.0030121	0.501	K0	0
BC094916	5	chr1:173522833-173525222	-	CE	0.94803	0.97151	-0.023479	0.655	K0	0
Rabgap1l	1	chr1:160792939-160792946	-	TS	0.81827	0.97454	-0.15627	0.865	K1	0.9172
Rabgap1l	2	chr1:160792736-160792938	-	TS	0.18112	0.026001	0.15512	0.844	K1	0.9172
Rabgap1l	3	chr1:160740884-160740931	-	CE	0.99151	0.9794	0.012102	0.707	K2	0.4543
Rabgap1l	4	chr1:160740863-160740883	-	AD	0.85144	0.84738	0.0040553	0.52	K3	1.1494
Rabgap1l	5	chr1:160740800-160740862	-	RI	0.79322	0.80408	-0.010859	0.548	K3	1.1494
Rabgap1l	6	chr1:160740752-160740799	-	CE	0.93279	0.94812	-0.015329	0.509	K3	1.1494
Rabgap1l	7	chr1:160738896-160739088	-	CE	0.9616	0.99188	-0.030281	0.942	K2	0.8239
Rabgap1l	8	chr1:160735548-160735758	-	CE	0.99238	0.99334	-0.00096045	0.54	K0	0
Rabgap1l	9	chr1:160733529-160733703	-	CE	0.98069	0.9925	-0.011813	0.739	K1	0.1555
Rabgap1l	10	chr1:160724032-160724189	-	CE	0.97948	0.98964	-0.010158	0.679	K1	0.1555
Rabgap1l	11	chr1:160722133-160722243	-	CE	0.98331	0.99365	-0.010345	0.718	K1	0.1555
Rabgap1l	12	chr1:160710147-160710213	-	CE	0.97589	0.95874	0.017147	0.681	K2	0.4508
Rabgap1l	13	chr1:160702358-160702460	-	CE	0.96139	0.98459	-0.023201	0.779	K2	0.4508
Rabgap1l	14	chr1:160701691-160702357	-	AD	0.061265	0.075443	-0.014178	0.619	K2	0.514
Rabgap1l	15	chr1:160700712-160700878	-	CE	0.97718	0.9851	-0.0079191	0.642	K2	0.514
Rabgap1l	16	chr1:160682041-160682182	-	CE	0.99268	0.99131	0.0013661	0.53	K0	0
Rabgap1l	17	chr1:160672451-160672701	-	AL	0.014757	0.019887	-0.0051297	0.58	K0	0
Rabgap1l	18	chr1:160645308-160645401	-	CE	0.99336	0.99049	0.0028678	0.582	K0	0
Rabgap1l	19	chr1:160627215-160627365	-	CE	0.9919	0.9529	0.039005	0.884	K1	0.4344
Rabgap1l	20	chr1:160471998-160472111	-	CE	0.98515	0.98555	-0.00040118	0.511	K0	0
Rabgap1l	21	chr1:160453751-160453825	-	CE	0.98498	0.98297	0.002017	0.508	K0	0
Rabgap1l	22	chr1:160443191-160443316	-	CE	0.97742	0.96793	0.0094913	0.611	K0	0
Rabgap1l	23	chr1:160441823-160441966	-	CE	0.93765	0.93887	-0.0012186	0.52	K0	0
Rabgap1l	24	chr1:160392182-160392223	-	CE	0.93749	0.95275	-0.015265	0.561	K0	0
Rabgap1l	25	chr1:160351221-160351571	-	AF	0.10438	0.08654	0.017839	0.562	K0	0
Rabgap1l	26	chr1:160342036-160342164	-	CE	0.95772	0.95701	0.00071081	0.524	K0	0
Rabgap1l	27	chr1:160309071-160342035	-	AD	0.95803	0.94008	0.017945	0.666	K3	1.5071
Rabgap1l	28	chr1:160308978-160309070	-	AD	0.96231	0.92846	0.033856	0.854	K3	1.5071
Rabgap1l	29	chr1:160307785-160307911	-	AA	0.90493	0.90961	-0.0046894	0.53	K3	1.5071
Rabgap1l	30	chr1:160307176-160307784	-	CE	0.95754	0.9404	0.017139	0.727	K3	1.5071
Rabgap1l	31	chr1:160306424-160307175	-	AD	0.18458	0.32228	-0.13771	0.92	K3	1.5071
Rabgap1l	32	chr1:160257443-160257535	-	CE	0.99725	0.99451	0.0027395	0.651	K0	0
Rabgap1l	35	chr1:160247459-160247569	-	CE	0.98211	0.97372	0.0083877	0.615	K0	0
Rabgap1l	36	chr1:160242107-160247458	-	AD	0.182	0.068828	0.11318	0.832	K1	0.8377
Rabgap1l	37	chr1:160238531-160238635	-	CE	0.99254	0.99039	0.002151	0.553	K0	0
Rabgap1l	38	chr1:160236626-160236709	-	CE	0.99461	0.99353	0.0010807	0.533	K0	0
Rabgap1l	39	chr1:160231796-160231867	-	CE	0.9947	0.98994	0.0047621	0.645	K2	0.2277
Rabgap1l	40	chr1:160229286-160231795	-	AD	0.060063	0.15685	-0.096786	0.846	K2	0.8113
Rabgap1l	41	chr1:160226485-160226682	-	CE	0.99503	0.99297	0.0020603	0.556	K0	0
Rabgap1l	42	chr1:160225864-160226484	-	AD	0.10772	0.10576	0.0019604	0.551	K1	0.5157
Xpr1	1	chr1:155417408-155417415	-	TS	0.12885	0.01444	0.11441	0.897	K2	1.5076
Xpr1	2	chr1:155417330-155417407	-	TS	0.73839	0.59671	0.14168	0.603	K2	1.5076
Xpr1	3	chr1:155417166-155417329	-	TS	0.14503	0.40424	-0.25921	0.686	K2	1.5076
Xpr1	4	chr1:155384611-155384662	-	CE	0.99082	0.99043	0.00039548	0.531	K0	0
Xpr1	5	chr1:155345553-155345654	-	CE	0.98742	0.98699	0.00043278	0.516	K0	0
Xpr1	6	chr1:155332382-155332386	-	AA	0.9119	0.95734	-0.045436	0.727	K1	0.5339
Xpr1	7	chr1:155332163-155332381	-	CE	0.98298	0.98152	0.0014564	0.531	K0	0
Xpr1	8	chr1:155330338-155330487	-	CE	0.98885	0.98999	-0.001146	0.508	K0	0
Xpr1	9	chr1:155328599-155328682	-	CE	0.98893	0.99199	-0.0030561	0.587	K0	0
Xpr1	10	chr1:155324314-155324395	-	CE	0.99041	0.99252	-0.002107	0.549	K0	0
Xpr1	11	chr1:155313171-155313361	-	CE	0.99206	0.99219	-0.00013322	0.522	K0	0
Xpr1	12	chr1:155312759-155312938	-	CE	0.99089	0.99169	-0.00080632	0.508	K0	0
Xpr1	13	chr1:155308951-155309122	-	CE	0.98937	0.99411	-0.0047446	0.604	K0	0
Xpr1	14	chr1:155307622-155307816	-	CE	0.99193	0.99398	-0.0020534	0.588	K0	0
Xpr1	15	chr1:155293109-155293275	-	CE	0.97578	0.9862	-0.010411	0.747	K1	0.1335
Xpr1	16	chr1:155290195-155290331	-	CE	0.99039	0.99012	0.00026454	0.505	K0	0
Xpr1	17	chr1:155283213-155283434	-	CE	0.99083	0.99028	0.00055601	0.531	K0	0
Xpr1	19	chr1:155278982-155281070	-	TE	0.11976	0.10486	0.014898	0.663	K1	0.5814
Xpr1	20	chr1:155275701-155278981	-	TE	0.88055	0.89518	-0.01463	0.661	K1	0.5814
Rc3h1	4	chr1:160938112-160938232	+	CE	0.99503	0.99578	-0.00075678	0.55	K0	0
Rc3h1	5	chr1:160939995-160940234	+	CE	0.99313	0.99338	-0.00025139	0.515	K0	0
Rc3h1	6	chr1:160940819-160940826	+	AA	0.9464	0.95833	-0.011926	0.545	K1	0.3891
Rc3h1	7	chr1:160940827-160940994	+	CE	0.99159	0.99131	0.00027874	0.512	K0	0
Rc3h1	8	chr1:160940995-160942039	+	AD	0.23433	0.23699	-0.0026635	0.51	K1	0.9197
Rc3h1	9	chr1:160942528-160942728	+	CE	0.76775	0.76424	0.0035031	0.507	K1	0.9197
Rc3h1	10	chr1:160946534-160946666	+	CE	0.99559	0.9963	-0.00070503	0.544	K0	0
Rc3h1	11	chr1:160948307-160948425	+	CE	0.99045	0.99587	-0.0054169	0.733	K1	0.0912
Rc3h1	12	chr1:160950222-160950334	+	CE	0.99574	0.99564	9.8587e-05	0.502	K0	0
Rc3h1	13	chr1:160950841-160951122	+	CE	0.99542	0.99644	-0.0010242	0.526	K0	0
Rc3h1	14	chr1:160951615-160951829	+	CE	0.99556	0.99649	-0.00092911	0.55	K0	0
Rc3h1	15	chr1:160954784-160955151	+	CE	0.99485	0.9952	-0.00034885	0.508	K0	0
Rc3h1	16	chr1:160955815-160955979	+	CE	0.98989	0.99547	-0.0055802	0.698	K2	0.145
Rc3h1	17	chr1:160959401-160959553	+	CE	0.98769	0.9924	-0.0047114	0.638	K2	0.145
Rc3h1	18	chr1:160962271-160962484	+	CE	0.99639	0.99683	-0.00043793	0.503	K0	0
Rc3h1	19	chr1:160963479-160963569	+	CE	0.99479	0.99536	-0.00056362	0.538	K0	0
Rc3h1	20	chr1:160963708-160963840	+	CE	0.99384	0.99473	-0.00089363	0.516	K0	0
Rc3h1	21	chr1:160964950-160964976	+	AA	0.94343	0.96085	-0.017421	0.694	K1	0.3185
Rc3h1	22	chr1:160964977-160965120	+	CE	0.99398	0.99469	-0.00071352	0.547	K0	0
Rc3h1	23	chr1:160965673-160965788	+	CE	0.99516	0.99639	-0.0012292	0.558	K0	0
Rc3h1	24	chr1:160967647-160967817	+	TE	0.42329	0.33634	0.086949	0.953	K1	0.9966
Rc3h1	25	chr1:160967818-160974978	+	TE	0.57709	0.66365	-0.08656	0.944	K1	0.9966
Desi2	1	chr1:178187417-178187531	+	TS	0.96284	0.96575	-0.0029106	0.633	K1	0.3891
Desi2	2	chr1:178187532-178187957	+	TS	0.038363	0.03435	0.0040137	0.652	K1	0.3891
Desi2	3	chr1:178198218-178198290	+	CE	0.16834	0.16471	0.003636	0.554	K2	1.227
Desi2	4	chr1:178214929-178218543	+	CE	0.39084	0.28646	0.10438	0.717	K2	1.3127
Desi2	5	chr1:178218544-178232978	+	AD	0.38948	0.27733	0.11215	0.729	K2	1.3127
Desi2	6	chr1:178237912-178237984	+	CE	0.98303	0.97388	0.0091557	0.574	K2	0.5053
Desi2	7	chr1:178242612-178242705	+	CE	0.9834	0.96693	0.016477	0.685	K2	1.0952
Desi2	8	chr1:178244341-178244357	+	AA	0.78626	0.78593	0.00033345	0.521	K2	1.0952
Desi2	9	chr1:178244358-178244482	+	CE	0.99218	0.98825	0.0039298	0.586	K0	0
Desi2	12	chr1:178256103-178257295	+	TE	0.95346	0.33778	0.61568	0.773	K1	0.0042
Desi2	13	chr1:178257296-178257301	+	TE	0.047983	0.66384	-0.61586	0.77	K1	0.0042
Fam20b	1	chr1:156719073-156719086	-	TS	0.93674	0.92093	0.015806	0.543	K1	0
Fam20b	2	chr1:156718866-156719072	-	TS	0.059673	0.076593	-0.01692	0.572	K1	0
Fam20b	3	chr1:156718166-156718865	-	AD	0.29303	0.43426	-0.14123	0.753	K2	1.5817
Fam20b	4	chr1:156716888-156716980	-	CE	0.71507	0.82838	-0.11332	0.844	K2	1.5198
Fam20b	5	chr1:156705668-156706167	-	CE	0.99392	0.98772	0.0062023	0.65	K0	0
Fam20b	6	chr1:156703252-156705667	-	AD	0.14092	0.19664	-0.055724	0.561	K1	0.9409
Fam20b	7	chr1:156702399-156702485	-	CE	0.99349	0.98821	0.0052812	0.644	K0	0
Fam20b	8	chr1:156698727-156698836	-	CE	0.99214	0.98484	0.007304	0.675	K0	0
Fam20b	9	chr1:156690477-156690648	-	CE	0.9937	0.98758	0.0061183	0.63	K0	0
Fam20b	10	chr1:156687356-156687547	-	CE	0.99187	0.9866	0.0052686	0.571	K0	0
Fam20b	11	chr1:156686191-156686250	-	CE	0.9912	0.98364	0.0075552	0.589	K0	0
Fam20b	12	chr1:156678571-156681642	-	TE	0.99948	0.99902	0.00046413	0.653	K1	0
Fam20b	13	chr1:156678532-156678570	-	TE	0.00055392	0.00095189	-0.00039798	0.6	K1	0
Trmt1l	2	chr1:151428931-151429102	+	AD	0.98661	0.98222	0.0043905	0.569	K0	0
Trmt1l	3	chr1:151433794-151433904	+	CE	0.98942	0.98859	0.0008299	0.525	K0	0
Trmt1l	4	chr1:151435728-151435841	+	CE	0.99001	0.99089	-0.00087642	0.502	K0	0
Trmt1l	5	chr1:151439282-151439393	+	CE	0.080693	0.074829	0.0058643	0.556	K1	0.4206
Trmt1l	6	chr1:151439516-151439580	+	CE	0.99125	0.99249	-0.001242	0.546	K0	0
Trmt1l	7	chr1:151440806-151440935	+	CE	0.99237	0.99168	0.00069371	0.532	K0	0
Trmt1l	8	chr1:151442587-151442710	+	CE	0.99235	0.98035	0.012008	0.742	K1	0.2167
Trmt1l	9	chr1:151443247-151443326	+	CE	0.99161	0.99098	0.00062236	0.514	K0	0
Trmt1l	10	chr1:151444940-151445071	+	CE	0.096103	0.065034	0.031069	0.704	K1	0.499
Trmt1l	11	chr1:151448254-151448497	+	CE	0.99189	0.98863	0.0032558	0.554	K0	0
Trmt1l	12	chr1:151449900-151450112	+	CE	0.99119	0.98841	0.0027746	0.522	K0	0
Trmt1l	13	chr1:151450113-151450380	+	AD	0.10447	0.17974	-0.075268	0.615	K1	0.942
Trmt1l	14	chr1:151452048-151452238	+	CE	0.98984	0.98637	0.0034707	0.543	K0	0
Trmt1l	15	chr1:151453077-151453155	+	CE	0.99246	0.98955	0.0029083	0.588	K0	0
Trmt1l	16	chr1:151453885-151454051	+	CE	0.99461	0.99384	0.00076995	0.555	K0	0
Trmt1l	17	chr1:151454978-151455040	+	CE	0.99575	0.99459	0.0011652	0.549	K0	0
Trmt1l	18	chr1:151457463-151457589	+	CE	0.99463	0.99317	0.0014664	0.55	K0	0
Taf1a	2	chr1:183389091-183389158	+	AD	0.35368	0.36609	-0.012406	0.53	K1	0.9877
Taf1a	3	chr1:183390921-183391044	+	CE	0.98987	0.98908	0.00079443	0.502	K0	0
Taf1a	4	chr1:183391045-183391699	+	AD	0.14917	0.14381	0.0053547	0.556	K2	0.8651
Taf1a	5	chr1:183395910-183396079	+	CE	0.93924	0.97054	-0.031293	0.812	K2	0.8651
Taf1a	6	chr1:183397780-183397893	+	CE	0.94058	0.97951	-0.038931	0.892	K2	0.8651
Taf1a	7	chr1:183400603-183400801	+	CE	0.98958	0.98977	-0.00019304	0.541	K0	0
Taf1a	8	chr1:183402620-183402750	+	CE	0.98856	0.98908	-0.00051987	0.507	K0	0
Taf1a	9	chr1:183404327-183404485	+	CE	0.98723	0.98499	0.0022463	0.531	K0	0
Taf1a	10	chr1:183405896-183405962	+	CE	0.96155	0.80682	0.15473	0.842	K2	0.968
Taf1a	11	chr1:183406544-183406635	+	CE	0.94049	0.87066	0.069836	0.697	K2	0.8414
Taf1a	14	chr1:183408609-183408763	+	CE	0.93356	0.93209	0.0014659	0.529	K0	0
Tnr	24	chr1:159924094-159924397	+	TE	0.071579	0.027094	0.044485	0.728	K1	0
Tnr	25	chr1:159924398-159931729	+	TE	0.92613	0.97197	-0.045839	0.717	K1	0
Vangl2	4	chr1:172026591-172026997	-	AD	0.21708	0.33742	-0.12035	0.741	K2	1.2079
Vangl2	5	chr1:172022477-172026590	-	AD	0.081085	0.070621	0.010463	0.555	K2	1.2079
Vangl2	6	chr1:172013083-172013345	-	CE	0.98299	0.98383	-0.00084541	0.527	K0	0
Vangl2	7	chr1:172012828-172012948	-	CE	0.9867	0.98925	-0.0025495	0.518	K0	0
Vangl2	8	chr1:172009441-172010048	-	CE	0.98193	0.98578	-0.0038484	0.567	K0	0
Vangl2	9	chr1:172008799-172008918	-	CE	0.12764	0.1093	0.018341	0.539	K3	1.0937
Vangl2	10	chr1:172008526-172008643	-	CE	0.89618	0.93531	-0.039134	0.618	K3	1.1425
Vangl2	11	chr1:172008507-172008525	-	AD	0.82806	0.85352	-0.025466	0.521	K3	1.1425
Vangl2	12	chr1:172007911-172008046	-	CE	0.97639	0.97469	0.0017003	0.508	K0	0
Vangl2	13	chr1:172006090-172006321	-	CE	0.98319	0.98149	0.0017086	0.515	K0	0
Vangl2	14	chr1:172004429-172004862	-	TE	0.23241	0.27862	-0.046205	0.538	K1	0.9944
Vangl2	15	chr1:172000960-172004428	-	TE	0.76798	0.7212	0.046781	0.556	K1	0.9944
Tpp2	1	chr1:43934007-43934014	+	TS	0.0041764	0.042073	-0.037897	0.807	K1	0.508
Tpp2	2	chr1:43934015-43934253	+	TS	0.99581	0.95762	0.038198	0.817	K1	0.508
Tpp2	3	chr1:43934254-43936856	+	AD	0.036104	0.031497	0.0046065	0.58	K2	0.265
Tpp2	4	chr1:43940110-43940238	+	CE	0.99447	0.99657	-0.002104	0.624	K2	0.265
Tpp2	5	chr1:43949312-43949407	+	CE	0.99477	0.99837	-0.0035975	0.794	K2	0.265
Tpp2	6	chr1:43951107-43951211	+	CE	0.99442	0.99776	-0.0033386	0.707	K2	0.265
Tpp2	7	chr1:43953257-43953381	+	CE	0.9976	0.99765	-4.8685e-05	0.518	K0	0
Tpp2	8	chr1:43954577-43954740	+	CE	0.99433	0.99742	-0.003089	0.731	K6	1.5714
Tpp2	9	chr1:43954741-43954808	+	AD	0.027351	0.034468	-0.0071167	0.607	K6	1.5714
Tpp2	10	chr1:43956471-43956625	+	CE	0.99399	0.99679	-0.0027966	0.705	K6	1.5714
Tpp2	11	chr1:43957417-43957435	+	AA	0.020208	0.012672	0.007536	0.722	K6	1.6826
Tpp2	12	chr1:43957436-43957512	+	CE	0.99435	0.99734	-0.0029869	0.705	K6	1.6826
Tpp2	13	chr1:43960084-43960211	+	CE	0.9946	0.99763	-0.0030255	0.7	K6	1.6826
Tpp2	14	chr1:43960868-43960967	+	CE	0.99424	0.99712	-0.0028795	0.702	K6	1.6826
Tpp2	15	chr1:43968882-43969030	+	CE	0.99435	0.99711	-0.0027673	0.704	K6	1.6826
Tpp2	16	chr1:43970401-43970516	+	CE	0.99496	0.99764	-0.0026794	0.711	K6	1.6826
Tpp2	17	chr1:43971564-43971732	+	CE	0.99401	0.99667	-0.0026635	0.666	K6	1.6826
Tpp2	18	chr1:43972530-43972555	+	AA	0.95545	0.97942	-0.023972	0.882	K6	1.6826
Tpp2	19	chr1:43972556-43972687	+	CE	0.99355	0.99554	-0.0019883	0.639	K6	1.6826
Tpp2	20	chr1:43973444-43973520	+	CE	0.99361	0.9978	-0.00419	0.857	K6	1.6826
Tpp2	21	chr1:43975416-43975522	+	CE	0.99562	0.99828	-0.0026571	0.744	K6	1.6826
Tpp2	22	chr1:43977207-43977361	+	CE	0.99469	0.99782	-0.0031292	0.701	K6	1.6826
Tpp2	23	chr1:43978413-43978529	+	CE	0.99495	0.99816	-0.0032136	0.724	K6	1.6826
Tpp2	24	chr1:43978735-43978835	+	CE	0.99481	0.99806	-0.003253	0.743	K6	1.6826
Tpp2	25	chr1:43980308-43980404	+	CE	0.99437	0.99125	0.0031254	0.699	K6	1.6826
Tpp2	26	chr1:43981730-43981867	+	CE	0.99486	0.99608	-0.0012177	0.588	K6	1.6826
Tpp2	27	chr1:43983072-43983316	+	CE	0.99496	0.99679	-0.0018344	0.62	K6	1.6826
Tpp2	28	chr1:43983514-43983592	+	CE	0.98786	0.98915	-0.0012963	0.599	K6	1.6826
Tpp2	29	chr1:43983593-43984315	+	AD	0.052912	0.061122	-0.0082098	0.588	K6	1.6826
Tpp2	30	chr1:43985416-43985454	+	CE	0.14421	0.11702	0.02719	0.692	K6	1.6826
Tpp2	31	chr1:43990511-43990662	+	CE	0.99387	0.99587	-0.0020019	0.617	K6	1.6826
Tpp2	32	chr1:43991263-43991359	+	CE	0.99426	0.99672	-0.0024543	0.661	K6	1.6826
Tpp2	33	chr1:43992264-43992394	+	CE	0.99407	0.99649	-0.002416	0.667	K6	1.6826
Tpp2	34	chr1:43992395-43992405	+	AD	0.077678	0.065186	0.012493	0.64	K6	1.6826
Tpp2	35	chr1:43999628-43999835	+	CE	0.99676	0.99626	0.00049445	0.521	K0	0
Tpp2	36	chr1:44001319-44001438	+	CE	0.99732	0.99723	8.6282e-05	0.537	K0	0
Tpp2	37	chr1:44002104-44002971	+	TE	0.32454	0.51054	-0.186	0.729	K1	0.9973
Tpp2	38	chr1:44002972-44003000	+	TE	0.67631	0.48984	0.18647	0.718	K1	0.9973
Gm15834	5	chr1:58510571-58510644	+	CE	0.90681	0.88961	0.017203	0.535	K0	0
Gm15834	6	chr1:58510645-58512138	+	RI	0.85698	0.76233	0.09465	0.761	K1	0.7079
Gm15834	7	chr1:58512139-58512266	+	CE	0.90371	0.74117	0.16254	0.876	K1	0.7079
Gm15834	8	chr1:58515712-58515777	+	CE	0.8982	0.89305	0.0051494	0.513	K0	0
Gm15834	9	chr1:58515778-58517062	+	RI	0.93837	0.61582	0.32255	0.798	K2	1.3575
Gm15834	10	chr1:58517063-58517169	+	CE	0.93421	0.59978	0.33443	0.864	K2	1.3575
Stk25	2	chr1:93635298-93635383	-	CE	0.99402	0.99293	0.0010937	0.518	K0	0
Stk25	3	chr1:93629034-93629264	-	CE	0.99666	0.99591	0.00074644	0.541	K0	0
Stk25	4	chr1:93627654-93627710	-	CE	0.98895	0.97582	0.013127	0.586	K5	1.8415
Stk25	5	chr1:93627025-93627133	-	CE	0.99604	0.99246	0.0035798	0.669	K5	1.8415
Stk25	6	chr1:93626051-93626208	-	CE	0.99574	0.99193	0.0038043	0.66	K5	1.8415
Stk25	7	chr1:93625781-93625966	-	CE	0.99672	0.99366	0.0030576	0.689	K5	1.8415
Stk25	8	chr1:93625607-93625645	-	AA	0.19396	0.18978	0.0041774	0.512	K5	1.8415
Stk25	9	chr1:93625461-93625606	-	CE	0.99692	0.99406	0.0028546	0.657	K5	1.8415
Stk25	10	chr1:93625034-93625148	-	CE	0.93663	0.90463	0.032	0.822	K5	1.8415
Stk25	11	chr1:93624553-93624624	-	CE	0.99725	0.99463	0.0026211	0.686	K5	1.8415
Stk25	12	chr1:93623568-93624552	-	AD	0.068366	0.059304	0.0090621	0.638	K5	1.8415
Stk25	13	chr1:93623396-93623532	-	CE	0.99762	0.98298	0.014638	0.803	K5	1.8415
Stk25	14	chr1:93623287-93623395	-	AD	0.027741	0.052084	-0.024343	0.805	K5	1.8415
Gls	1	chr1:52233224-52233232	-	TS	0.75469	0.6873	0.067387	0.569	K1	0.998
Gls	2	chr1:52232592-52233223	-	TS	0.2456	0.31206	-0.066462	0.598	K1	0.998
Gls	3	chr1:52232096-52232296	-	AF	0.0063106	0.0071455	-0.00083494	0.576	K0	0
Gls	4	chr1:52219943-52220039	-	CE	0.99807	0.99811	-3.0696e-05	0.522	K0	0
Gls	5	chr1:52219561-52219609	-	CE	0.99896	0.99677	0.0021869	0.734	K2	0.7674
Gls	6	chr1:52219488-52219560	-	AD	0.99883	0.99651	0.0023164	0.735	K2	0.7674
Gls	7	chr1:52219461-52219487	-	AD	0.11779	0.12926	-0.011478	0.537	K2	0.8547
Gls	8	chr1:52217188-52219460	-	AD	0.11716	0.12881	-0.011659	0.537	K2	0.8547
Gls	9	chr1:52216944-52217187	-	AD	0.092305	0.1101	-0.017792	0.596	K2	0.9236
Gls	10	chr1:52215565-52215694	-	CE	0.99899	0.99866	0.00033391	0.572	K0	0
Gls	11	chr1:52214478-52214557	-	CE	0.99895	0.99856	0.00039353	0.587	K0	0
Gls	12	chr1:52213324-52214477	-	AD	0.1088	0.085163	0.023635	0.674	K1	0.6046
Gls	13	chr1:52212327-52212366	-	AA	0.9987	0.99826	0.00043442	0.551	K0	0
Gls	14	chr1:52212203-52212326	-	CE	0.99891	0.99864	0.00027053	0.555	K0	0
Gls	15	chr1:52209416-52212202	-	AD	0.029937	0.030498	-0.00056171	0.572	K1	0.2903
Gls	16	chr1:52207301-52207359	-	CE	0.99898	0.99878	0.0002085	0.562	K0	0
Gls	17	chr1:52204346-52204516	-	CE	0.042459	0.03411	0.008349	0.715	K3	0.4372
Gls	18	chr1:52201170-52201219	-	CE	0.0176	0.016596	0.0010039	0.559	K3	0.4372
Gls	19	chr1:52200618-52200651	-	CE	0.011179	0.0085866	0.0025921	0.654	K3	0.4372
Gls	20	chr1:52199855-52199887	-	CE	0.99903	0.9987	0.0003289	0.608	K0	0
Gls	21	chr1:52199711-52199769	-	CE	0.99869	0.99858	0.00011015	0.525	K0	0
Gls	22	chr1:52196743-52196809	-	CE	0.99854	0.99835	0.00018143	0.537	K0	0
Gls	23	chr1:52196165-52196215	-	CE	0.99842	0.99791	0.00051309	0.554	K0	0
Gls	24	chr1:52193429-52196164	-	AD	0.026833	0.035674	-0.0088406	0.706	K1	0.2444
Gls	25	chr1:52191111-52191287	-	CE	0.99859	0.99813	0.00045809	0.571	K0	0
Gls	26	chr1:52189423-52189554	-	CE	0.99885	0.99852	0.00033384	0.543	K0	0
Gls	27	chr1:52188679-52188771	-	CE	0.99881	0.99854	0.00026645	0.526	K0	0
Gls	28	chr1:52187795-52187853	-	AA	0.24797	0.2646	-0.016627	0.655	K2	1.322
Gls	29	chr1:52184104-52187794	-	AL	0.91654	0.88852	0.028025	0.777	K2	1.322
Gls	30	chr1:52168897-52168958	-	CE	0.98517	0.98604	-0.00086747	0.52	K0	0
Gls	31	chr1:52168485-52168561	-	CE	0.98254	0.98082	0.0017196	0.515	K0	0
Gls	32	chr1:52168336-52168399	-	CE	0.98191	0.98098	0.00092134	0.503	K0	0
Gls	33	chr1:52165941-52166314	-	TE	0.21896	0.25928	-0.040316	0.727	K1	0.9259
Gls	34	chr1:52163448-52165940	-	TE	0.78085	0.74035	0.040495	0.695	K1	0.9259
Bcs1l	4	chr1:74588394-74588487	+	AD	0.53486	0.40315	0.13171	0.724	K2	1.4385
Bcs1l	5	chr1:74588488-74588604	+	AD	0.31617	0.30316	0.013013	0.542	K2	1.4385
Bcs1l	6	chr1:74589486-74589878	+	CE	0.95968	0.96562	-0.0059364	0.506	K0	0
Bcs1l	7	chr1:74589960-74590099	+	CE	0.97496	0.97901	-0.0040483	0.539	K0	0
Bcs1l	8	chr1:74590265-74590459	+	CE	0.98075	0.97874	0.0020053	0.547	K0	0
Bcs1l	9	chr1:74590671-74590734	+	CE	0.92205	0.97028	-0.048234	0.846	K1	0.3766
Bcs1l	10	chr1:74590960-74591129	+	CE	0.97524	0.9619	0.013338	0.565	K0	0
Bcs1l	11	chr1:74591589-74591706	+	CE	0.9808	0.97453	0.0062667	0.55	K0	0
Bcs1l	12	chr1:74591822-74592124	+	TE	0.011114	0.055463	-0.044349	0.785	K2	1.1674
Bcs1l	13	chr1:74592125-74592189	+	TE	0.7585	0.74347	0.015039	0.555	K2	1.1674
Bcs1l	14	chr1:74592190-74592443	+	TE	0.24171	0.21907	0.022635	0.545	K2	1.1674
Igsf8	6	chr1:172312491-172312593	+	CE	0.97707	0.96657	0.010503	0.589	K0	0
Igsf8	7	chr1:172316151-172316528	+	CE	0.98339	0.97272	0.010675	0.561	K0	0
Igsf8	8	chr1:172317355-172317816	+	CE	0.99008	0.98378	0.0062935	0.577	K0	0
Igsf8	9	chr1:172318037-172318444	+	CE	0.99158	0.98594	0.0056387	0.576	K0	0
Igsf8	10	chr1:172318554-172318967	+	CE	0.98952	0.98397	0.0055576	0.571	K0	0
Igsf8	11	chr1:172319293-172319423	+	CE	0.98627	0.97965	0.0066176	0.559	K0	0
Nenf	2	chr1:191311460-191311520	-	CE	0.96482	0.96542	-0.00060067	0.527	K0	0
Nenf	3	chr1:191309919-191310022	-	CE	0.94265	0.94376	-0.0011155	0.524	K1	0.474
Lancl1	1	chr1:67038866-67038872	-	TS	0.022441	0.030363	-0.0079213	0.563	K2	0.9894
Lancl1	2	chr1:67038835-67038865	-	TS	0.39502	0.31993	0.075092	0.652	K2	0.9894
Lancl1	3	chr1:67038776-67038834	-	TS	0.60335	0.68074	-0.077383	0.662	K2	0.9894
Lancl1	4	chr1:67038772-67038775	-	AD	0.62422	0.66723	-0.043013	0.66	K2	1.2627
Lancl1	5	chr1:67038592-67038771	-	RI	0.58487	0.64302	-0.058154	0.723	K2	1.2627
Lancl1	6	chr1:67038495-67038591	-	CE	0.99474	0.9931	0.0016435	0.584	K0	0
Lancl1	7	chr1:67034124-67034241	-	CE	0.99538	0.9942	0.0011772	0.535	K0	0
Lancl1	8	chr1:67020858-67021065	-	CE	0.99209	0.99088	0.0012152	0.527	K0	0
Lancl1	9	chr1:67014606-67020857	-	AD	0.25153	0.22089	0.030641	0.635	K2	1.0553
Lancl1	10	chr1:67009911-67010046	-	CE	0.96667	0.96731	-0.00063704	0.514	K2	1.0553
Lancl1	11	chr1:67009228-67009374	-	CE	0.996	0.99572	0.00028272	0.502	K0	0
Lancl1	12	chr1:67006868-67007050	-	CE	0.99595	0.99568	0.00027124	0.523	K0	0
Lancl1	13	chr1:67004790-67004966	-	CE	0.99652	0.99588	0.00063969	0.527	K0	0
Lancl1	14	chr1:67004339-67004411	-	CE	0.996	0.99548	0.00052015	0.527	K0	0
Lancl1	15	chr1:67003375-67003557	-	TE	0.93072	0.91976	0.010963	0.594	K1	0.4987
Lancl1	16	chr1:67000517-67003374	-	TE	0.070587	0.080237	-0.0096491	0.605	K1	0.4987
Map3k19	12	chr1:127821977-127824397	-	CE	0.85222	0.90178	-0.04956	0.617	K0	0
Map3k19	13	chr1:127820387-127820533	-	CE	0.89052	0.87686	0.013658	0.546	K0	0
Serpinb2	4	chr1:107519652-107519771	+	CE	0.87108	0.87278	-0.0017049	0.543	K0	0
Serpinb2	5	chr1:107522147-107522275	+	CE	0.87752	0.88982	-0.012302	0.505	K0	0
Serpinb2	9	chr1:107524537-107525592	+	TE	0.91495	0.92792	-0.012963	0.521	K1	0.0015
Serpinb2	10	chr1:107525593-107525598	+	TE	0.086332	0.067268	0.019064	0.552	K1	0.0015
Rgs16	2	chr1:153740863-153740973	+	CE	0.87009	0.92087	-0.050781	0.645	K0	0
Rgs1	2	chr1:144248479-144248559	-	CE	0.97477	0.91948	0.055282	0.733	K0	0
Rgs1	3	chr1:144247906-144247967	-	CE	0.9748	0.90979	0.065009	0.737	K0	0
Rgs1	4	chr1:144246190-144246353	-	CE	0.97623	0.935	0.041233	0.722	K0	0
Dstyk	1	chr1:132417555-132417603	+	TS	0.10221	0.065536	0.036672	0.626	K1	0.5648
Dstyk	2	chr1:132417604-132417870	+	TS	0.89644	0.93217	-0.035739	0.629	K1	0.5648
Dstyk	3	chr1:132434099-132434487	+	CE	0.95439	0.91592	0.03847	0.702	K1	0.448
Dstyk	4	chr1:132449312-132449975	+	CE	0.96185	0.95617	0.0056812	0.518	K0	0
Dstyk	5	chr1:132451541-132453086	+	AA	0.33075	0.35954	-0.028792	0.563	K1	0.9999
Dstyk	6	chr1:132453087-132453319	+	CE	0.97504	0.96256	0.012477	0.603	K0	0
Dstyk	7	chr1:132454061-132454144	+	CE	0.97172	0.93407	0.037655	0.659	K0	0
Dstyk	8	chr1:132455232-132455408	+	CE	0.96533	0.93717	0.028155	0.63	K0	0
Dstyk	9	chr1:132455860-132455989	+	CE	0.96268	0.95005	0.012625	0.598	K0	0
Dstyk	10	chr1:132456325-132456481	+	CE	0.97126	0.95439	0.016869	0.579	K0	0
Dstyk	11	chr1:132456869-132457001	+	CE	0.97204	0.96792	0.0041198	0.5	K0	0
Dstyk	12	chr1:132458317-132458430	+	CE	0.95315	0.96557	-0.012417	0.588	K0	0
Dstyk	13	chr1:132459876-132459990	+	CE	0.95449	0.9501	0.004394	0.539	K0	0
Dstyk	14	chr1:132462913-132463047	+	CE	0.97049	0.94514	0.025357	0.645	K0	0
Dstyk	15	chr1:132463324-132464092	+	TE	0.23127	0.29025	-0.058983	0.622	K1	0.9939
Dstyk	16	chr1:132464093-132466958	+	TE	0.76894	0.70982	0.059118	0.668	K1	0.9939
Cnst	2	chr1:179546617-179547535	+	AD	0.1687	0.15491	0.013787	0.576	K2	0.8012
Cnst	3	chr1:179547536-179549735	+	AD	0.13556	0.14892	-0.01336	0.544	K2	0.8012
Cnst	4	chr1:179579338-179579768	+	CE	0.99224	0.98854	0.0036968	0.601	K0	0
Cnst	5	chr1:179592685-179592866	+	CE	0.99243	0.9897	0.0027339	0.557	K0	0
Cnst	6	chr1:179601702-179601732	+	CE	0.99015	0.98646	0.0036839	0.567	K0	0
Cnst	7	chr1:179604519-179604605	+	CE	0.99116	0.98862	0.0025372	0.552	K0	0
Cnst	8	chr1:179604953-179605067	+	CE	0.99221	0.98977	0.0024467	0.581	K0	0
Cnst	9	chr1:179606248-179606269	+	CE	0.9922	0.98444	0.0077628	0.691	K1	0.1206
Cnst	10	chr1:179606437-179606533	+	CE	0.99379	0.99106	0.0027326	0.542	K0	0
Cnst	11	chr1:179609786-179610666	+	CE	0.99312	0.99053	0.0025961	0.532	K0	0
Cnst	12	chr1:179622767-179622902	+	CE	0.99205	0.98862	0.0034229	0.53	K0	0
Cnst	13	chr1:179622903-179622978	+	AD	0.063072	0.089197	-0.026125	0.655	K1	0.5195
Mgat4a	4	chr1:37498600-37498740	-	CE	0.98943	0.99163	-0.0022037	0.551	K0	0
Mgat4a	5	chr1:37498573-37498599	-	AD	0.69886	0.61436	0.084502	0.711	K1	0.9878
Mgat4a	6	chr1:37496056-37496130	-	AF	0.041668	0.09594	-0.054272	0.777	K2	1.6084
Mgat4a	7	chr1:37496014-37496055	-	RI	0.14909	0.10995	0.039145	0.69	K2	1.6084
Mgat4a	8	chr1:37495873-37496013	-	CE	0.98127	0.94695	0.034329	0.823	K2	1.6084
Mgat4a	9	chr1:37490260-37490393	-	CE	0.97426	0.98249	-0.0082315	0.638	K0	0
Mgat4a	10	chr1:37471482-37490259	-	AD	0.70416	0.90002	-0.19586	0.723	K2	1.5128
Mgat4a	11	chr1:37466580-37466583	-	AA	0.54467	0.87808	-0.33341	0.958	K1	0.9893
Mgat4a	12	chr1:37466537-37466579	-	CE	0.97647	0.97526	0.0012135	0.509	K0	0
Mgat4a	13	chr1:37464421-37464534	-	CE	0.98745	0.98762	-0.00016829	0.537	K0	0
Mgat4a	14	chr1:37462892-37462967	-	CE	0.98507	0.98716	-0.0020839	0.52	K0	0
Mgat4a	15	chr1:37456705-37460112	-	AA	0.11178	0.1741	-0.062321	0.578	K1	0.958
Mgat4a	16	chr1:37456590-37456704	-	CE	0.98348	0.98396	-0.00048397	0.51	K0	0
Mgat4a	17	chr1:37454744-37454874	-	CE	0.98596	0.95254	0.033421	0.711	K1	0.4822
Mgat4a	18	chr1:37452522-37452629	-	CE	0.98696	0.98946	-0.0024979	0.564	K0	0
Mgat4a	19	chr1:37452231-37452424	-	CE	0.98664	0.98768	-0.0010467	0.511	K0	0
Mgat4a	20	chr1:37450393-37450407	-	AA	0.95399	0.87163	0.082355	0.915	K1	0.6357
Mgat4a	21	chr1:37450329-37450392	-	CE	0.99099	0.99142	-0.00043596	0.52	K0	0
Mgat4a	22	chr1:37449096-37449162	-	CE	0.99246	0.99316	-0.00070335	0.533	K0	0
Mgat4a	23	chr1:37444807-37444919	-	CE	0.99187	0.99311	-0.0012386	0.556	K0	0
Mgat4a	24	chr1:37444320-37444685	-	TE	0.1961	0.2843	-0.088193	0.833	K2	0.9085
Mgat4a	25	chr1:37443716-37444319	-	TE	0.00041285	0.00032929	8.3559e-05	0.561	K2	0.9085
Mgat4a	26	chr1:37439340-37443715	-	TE	0.80359	0.71574	0.087842	0.843	K2	0.9085
Ctla4	1	chr1:60909025-60909170	+	TS	0.097989	0.089495	0.0084941	0.553	K1	0.7539
Ctla4	2	chr1:60909171-60909279	+	TS	0.90243	0.91008	-0.0076566	0.561	K1	0.7539
Ctla4	3	chr1:60909280-60911890	+	AD	0.17597	0.19507	-0.019091	0.549	K2	1.0209
Ctla4	4	chr1:60912423-60912770	+	CE	0.94759	0.95975	-0.012166	0.569	K2	1.0209
Ctla4	5	chr1:60913219-60913328	+	CE	0.98737	0.97472	0.012655	0.679	K0	0
Ctla4	6	chr1:60914613-60914769	+	TE	0.30988	0.10934	0.20054	1	K1	0.9301
Ctla4	7	chr1:60914770-60915832	+	TE	0.68943	0.8909	-0.20147	1	K1	0.9301
Atg9a	1	chr1:75191927-75192196	-	TS	0.011213	0.013334	-0.0021207	0.554	K2	0.453
Atg9a	2	chr1:75191924-75191926	-	TS	0.90438	0.90979	-0.0054082	0.558	K2	0.453
Atg9a	3	chr1:75191824-75191923	-	TS	0.095365	0.090167	0.0051976	0.542	K2	0.453
Atg9a	4	chr1:75191487-75191823	-	AD	0.15061	0.18017	-0.029563	0.594	K2	1.4954
Atg9a	5	chr1:75190878-75190880	-	AA	0.53409	0.44572	0.088375	0.72	K2	1.4954
Atg9a	6	chr1:75190823-75190877	-	CE	0.98458	0.97792	0.0066602	0.576	K2	1.1321
Atg9a	7	chr1:75190303-75190434	-	CE	0.97852	0.98219	-0.0036729	0.527	K0	0
Atg9a	8	chr1:75190112-75190155	-	CE	0.97398	0.96369	0.010291	0.591	K1	0.2506
Atg9a	9	chr1:75189563-75189627	-	CE	0.97935	0.96975	0.0095958	0.571	K1	0.2506
Atg9a	10	chr1:75187945-75188106	-	CE	0.98033	0.9852	-0.0048697	0.558	K0	0
Atg9a	11	chr1:75187685-75187826	-	CE	0.98237	0.98574	-0.0033748	0.56	K0	0
Atg9a	12	chr1:75186190-75186938	-	CE	0.98526	0.98568	-0.000419	0.512	K0	0
Atg9a	13	chr1:75186010-75186104	-	CE	0.98668	0.98581	0.00086644	0.518	K0	0
Atg9a	14	chr1:75185951-75186009	-	AD	0.77868	0.89248	-0.11379	0.922	K1	0.8456
Atg9a	15	chr1:75185666-75185845	-	CE	0.98629	0.98423	0.0020644	0.524	K0	0
Atg9a	16	chr1:75185053-75185301	-	CE	0.98278	0.98278	7.1147e-06	0.503	K0	0
Atg9a	17	chr1:75184689-75184867	-	CE	0.97882	0.98195	-0.0031363	0.547	K0	0
Atg9a	18	chr1:75184456-75184573	-	CE	0.95365	0.96988	-0.016233	0.608	K1	0.3056
Atg9a	19	chr1:75182894-75183116	-	CE	0.97138	0.97226	-0.00088323	0.505	K0	0
Atg9a	20	chr1:75182592-75182737	-	CE	0.97425	0.97382	0.00043445	0.51	K0	0
Atg9a	21	chr1:75180866-75181931	-	TE	0.0048933	0.27642	-0.27153	0.565	K2	0.8367
Atg9a	22	chr1:75180865-75180865	-	TE	0.2062	0.11037	0.095827	0.838	K2	0.8367
Atg9a	23	chr1:75180860-75180864	-	TE	0.79338	0.61596	0.17741	0.553	K2	0.8367
Nifk	1	chr1:118321839-118321853	+	TS	0.43528	0.45475	-0.019471	0.504	K1	0.9994
Nifk	2	chr1:118321854-118321997	+	TS	0.56428	0.54634	0.01794	0.502	K1	0.9994
Nifk	3	chr1:118323582-118323725	+	CE	0.99646	0.99476	0.001699	0.584	K0	0
Nifk	4	chr1:118327625-118327733	+	CE	0.99651	0.99405	0.0024589	0.597	K0	0
Nifk	5	chr1:118329353-118329564	+	CE	0.99683	0.99537	0.0014629	0.524	K0	0
Nifk	6	chr1:118330606-118330662	+	CE	0.99718	0.99568	0.0014973	0.581	K0	0
Nifk	7	chr1:118332344-118332478	+	CE	0.99707	0.99563	0.0014337	0.58	K0	0
Nifk	8	chr1:118332750-118332941	+	TE	0.26768	0.24111	0.026571	0.653	K1	0.9067
Nifk	9	chr1:118332942-118333822	+	TE	0.73255	0.75908	-0.026532	0.651	K1	0.9067
Cd244	2	chr1:171559758-171559832	+	CE	0.87693	0.30827	0.56866	0.996	K1	0.8169
Cd244	3	chr1:171573681-171574004	+	CE	0.91302	0.91245	0.00057019	0.511	K0	0
Cd244	4	chr1:171574093-171574368	+	CE	0.89536	0.92335	-0.027992	0.545	K0	0
Cd244	5	chr1:171577243-171577347	+	CE	0.9062	0.86729	0.038902	0.581	K0	0
Cd244	7	chr1:171579099-171579170	+	CE	0.88142	0.72197	0.15945	0.834	K1	0.7526
Cd244	8	chr1:171580758-171580820	+	CE	0.85599	0.86785	-0.011858	0.515	K0	0
Gtf3c3	2	chr1:54437832-54437943	-	CE	0.99559	0.99442	0.0011734	0.524	K0	0
Gtf3c3	3	chr1:54434054-54434238	-	CE	0.99301	0.9912	0.0018083	0.56	K0	0
Gtf3c3	4	chr1:54430620-54430622	-	AA	0.98288	0.96248	0.020401	0.703	K1	0.3235
Gtf3c3	5	chr1:54430499-54430619	-	CE	0.9934	0.9902	0.0032012	0.55	K0	0
Gtf3c3	6	chr1:54428762-54428953	-	CE	0.99483	0.99216	0.0026759	0.57	K0	0
Gtf3c3	7	chr1:54427400-54427565	-	CE	0.99206	0.98997	0.0020889	0.548	K0	0
Gtf3c3	8	chr1:54424009-54424156	-	CE	0.99283	0.99147	0.0013666	0.552	K0	0
Gtf3c3	9	chr1:54423501-54423573	-	CE	0.96482	0.98073	-0.015903	0.626	K2	0.3186
Gtf3c3	10	chr1:54420466-54420499	-	AA	0.99198	0.97839	0.013581	0.763	K2	0.2378
Gtf3c3	11	chr1:54420396-54420465	-	CE	0.99365	0.9915	0.0021456	0.549	K0	0
Gtf3c3	12	chr1:54419383-54419554	-	CE	0.99253	0.98963	0.0028942	0.587	K0	0
Gtf3c3	13	chr1:54417659-54417861	-	CE	0.98925	0.98551	0.0037347	0.558	K0	0
Gtf3c3	14	chr1:54416722-54416823	-	CE	0.99199	0.98898	0.0030157	0.58	K0	0
Gtf3c3	15	chr1:54415884-54416019	-	CE	0.99471	0.992	0.002715	0.596	K0	0
Gtf3c3	16	chr1:54405837-54406074	-	CE	0.99409	0.98608	0.0080091	0.743	K1	0.1377
Gtf3c3	17	chr1:54404980-54405170	-	CE	0.99254	0.98591	0.0066263	0.667	K1	0.1377
Gtf3c3	18	chr1:54403511-54403635	-	CE	0.99369	0.98682	0.0068698	0.705	K1	0.1377
Gtf3c3	19	chr1:54399129-54399281	-	CE	0.99337	0.99101	0.0023623	0.587	K0	0
Vcpip1	2	chr1:9736966-9737052	-	CE	0.96698	0.9948	-0.027819	0.981	K1	0.2274
Adipor1	1	chr1:134415378-134415455	+	TS	0.85847	0.84923	0.0092338	0.546	K1	0.6881
Adipor1	2	chr1:134415456-134415585	+	TS	0.14089	0.15327	-0.012377	0.562	K1	0.6881
Adipor1	3	chr1:134415586-134415989	+	AD	0.19017	0.24294	-0.052771	0.753	K1	0.8655
Adipor1	4	chr1:134422921-134423155	+	CE	0.99556	0.9946	0.00095545	0.562	K0	0
Adipor1	5	chr1:134423958-134424074	+	CE	0.99672	0.9964	0.00031605	0.502	K0	0
Adipor1	6	chr1:134424751-134424922	+	CE	0.99717	0.99666	0.0005047	0.525	K0	0
Adipor1	7	chr1:134425909-134425982	+	AA	0.97789	0.98823	-0.010335	0.636	K1	0.2381
Adipor1	8	chr1:134425983-134426095	+	CE	0.99688	0.99613	0.00075441	0.53	K0	0
Adipor1	9	chr1:134428082-134428269	+	CE	0.99736	0.9967	0.00065646	0.516	K0	0
Adipor1	10	chr1:134431057-134431250	+	CE	0.9867	0.96808	0.018622	0.811	K1	0.2952
Adipor1	11	chr1:134431530-134433348	+	TE	0.92847	0.92798	0.00048461	0.522	K1	0.3692
Adipor1	12	chr1:134433349-134433351	+	TE	0.072043	0.072059	-1.5671e-05	0.516	K1	0.3692
Dnajb2	1	chr1:75236406-75236464	+	TS	0.052144	0.059703	-0.0075594	0.532	K2	0.0687
Dnajb2	2	chr1:75236465-75236468	+	TS	0.052628	0.061378	-0.0087504	0.518	K2	0.0687
Dnajb2	3	chr1:75236469-75236486	+	TS	0.94522	0.93334	0.011873	0.524	K2	0.0687
Dnajb2	4	chr1:75236487-75236537	+	TS	0.055587	0.064448	-0.0088607	0.525	K2	0.0687
Dnajb2	7	chr1:75236590-75236851	+	RI	0.49863	0.42358	0.075055	0.582	K2	1.3811
Dnajb2	8	chr1:75236852-75236948	+	CE	0.95603	0.94483	0.011204	0.524	K0	0
Dnajb2	9	chr1:75237455-75237564	+	CE	0.95039	0.95174	-0.0013505	0.571	K0	0
Dnajb2	10	chr1:75239280-75239333	+	CE	0.92305	0.85356	0.06949	0.626	K1	0.8523
Dnajb2	11	chr1:75239508-75239630	+	CE	0.91681	0.91966	-0.0028484	0.518	K0	0
Dnajb2	12	chr1:75240892-75240984	+	CE	0.9261	0.92192	0.0041841	0.51	K0	0
Dnajb2	13	chr1:75241171-75241273	+	CE	0.95666	0.95785	-0.0011938	0.551	K0	0
Dnajb2	14	chr1:75241409-75241479	+	CE	0.96665	0.95793	0.0087193	0.521	K0	0
Dnajb2	15	chr1:75243458-75243661	+	CE	0.9479	0.91215	0.035758	0.587	K0	0
Dnajb2	16	chr1:75243662-75244793	+	RI	0.58846	0.39048	0.19798	0.786	K1	0.9845
Dnajb2	17	chr1:75244794-75244804	+	TE	0.010169	0.011181	-0.0010121	0.503	K2	0.1826
Dnajb2	18	chr1:75244805-75245688	+	TE	0.48823	0.011139	0.47709	0.603	K2	0.1826
Dnajb2	19	chr1:75245689-75245690	+	TE	0.49802	0.96357	-0.46555	0.601	K2	0.1826
Dnajb2	20	chr1:75245691-75245692	+	TE	0.023472	0.036303	-0.01283	0.714	K2	0.1826
Rgs2	1	chr1:144004033-144004161	-	TS	0.01013	0.012915	-0.002785	0.516	K1	0
Rgs2	2	chr1:144004009-144004032	-	TS	0.98947	0.9875	0.0019674	0.505	K1	0
Rgs2	3	chr1:144002952-144003053	-	CE	0.98883	0.98649	0.0023326	0.504	K0	0
Rgs2	4	chr1:144002780-144002841	-	CE	0.99127	0.99007	0.0012071	0.511	K0	0
Rgs2	5	chr1:144002116-144002282	-	CE	0.99395	0.99295	0.0010043	0.503	K0	0
Glrx2	2	chr1:143739557-143739614	+	TS	0.022194	0.037397	-0.015204	0.624	K2	0.1251
Glrx2	3	chr1:143739615-143739617	+	TS	0.96474	0.95042	0.014317	0.592	K2	0.1251
Glrx2	4	chr1:143739618-143739684	+	TS	0.034267	0.049557	-0.01529	0.58	K2	0.1251
Glrx2	5	chr1:143739685-143739758	+	AD	0.84036	0.86177	-0.021405	0.638	K1	0.6672
Glrx2	6	chr1:143740375-143740479	+	AF	0.049473	0.023319	0.026153	0.773	K2	0.7983
Glrx2	7	chr1:143741648-143741711	+	CE	0.99287	0.99217	0.00070258	0.558	K0	0
Glrx2	8	chr1:143741712-143741754	+	AD	0.032081	0.082466	-0.050385	0.778	K2	0.9857
Glrx2	9	chr1:143742642-143745046	+	AA	0.039102	0.068907	-0.029805	0.742	K2	0.4439
Glrx2	10	chr1:143745047-143745223	+	CE	0.99404	0.99357	0.00047586	0.508	K0	0
Glrx2	13	chr1:143746508-143746776	+	TE	0.88485	0.84275	0.042101	0.904	K2	0.7449
Glrx2	14	chr1:143746777-143749401	+	TE	0.040783	0.043091	-0.0023081	0.53	K2	0.7449
Glrx2	15	chr1:143749402-143749676	+	TE	0.076651	0.11745	-0.040803	0.755	K2	0.7449
Dennd1b	1	chr1:138963435-138963708	+	TS	0.7098	0.71989	-0.010095	0.543	K1	0.8925
Dennd1b	2	chr1:138963709-138963885	+	TS	0.28736	0.27769	0.0096748	0.503	K1	0.8925
Dennd1b	3	chr1:138966166-138966230	+	CE	0.96338	0.94534	0.018038	0.569	K0	0
Dennd1b	4	chr1:138967720-138967828	+	AF	0.51902	0.74969	-0.23066	0.827	K2	1.0901
Dennd1b	5	chr1:138967829-138984363	+	AD	0.51919	0.74734	-0.22815	0.813	K2	1.0901
Dennd1b	6	chr1:139023105-139023148	+	CE	0.97981	0.9197	0.060104	0.77	K2	0.7431
Dennd1b	7	chr1:139040000-139040049	+	CE	0.93052	0.9402	-0.0096767	0.502	K2	0.7431
Dennd1b	8	chr1:139041924-139042043	+	CE	0.93078	0.94164	-0.010859	0.526	K1	0.5256
Dennd1b	9	chr1:139053346-139053415	+	CE	0.99109	0.99383	-0.0027492	0.59	K0	0
Dennd1b	10	chr1:139054541-139054621	+	CE	0.9948	0.99581	-0.0010055	0.524	K0	0
Dennd1b	11	chr1:139059067-139059126	+	CE	0.11742	0.089644	0.027773	0.709	K4	1.5487
Dennd1b	12	chr1:139060227-139060274	+	AA	0.036371	0.036648	-0.000277	0.523	K4	1.5487
Dennd1b	13	chr1:139060275-139060328	+	CE	0.98704	0.9833	0.0037405	0.591	K4	1.5487
Dennd1b	14	chr1:139062861-139062971	+	CE	0.98826	0.98214	0.0061209	0.655	K5	2.3355
Dennd1b	16	chr1:139081173-139081273	+	CE	0.79886	0.93638	-0.13753	0.806	K5	2.1156
Dennd1b	17	chr1:139085883-139085928	+	CE	0.82101	0.86899	-0.047981	0.804	K2	0.7978
Dennd1b	18	chr1:139090454-139090555	+	CE	0.95514	0.97574	-0.020596	0.764	K2	0.7978
Dennd1b	19	chr1:139101968-139102093	+	CE	0.9924	0.99227	0.00012538	0.509	K0	0
Dennd1b	20	chr1:139110384-139110485	+	CE	0.99156	0.99161	-4.934e-05	0.514	K0	0
Dennd1b	21	chr1:139133671-139133761	+	CE	0.99269	0.99215	0.00054652	0.501	K0	0
Dennd1b	22	chr1:139139381-139139421	+	CE	0.99239	0.99163	0.00075981	0.503	K0	0
Dennd1b	23	chr1:139140452-139140520	+	CE	0.99271	0.99181	0.00089622	0.515	K0	0
Dennd1b	24	chr1:139142834-139142890	+	CE	0.99322	0.993	0.00021846	0.533	K0	0
Dennd1b	25	chr1:139142891-139142934	+	AD	0.024895	0.026292	-0.0013967	0.541	K1	0.1697
Dennd1b	26	chr1:139143893-139144000	+	CE	0.99189	0.99213	-0.00023182	0.506	K0	0
Dennd1b	27	chr1:139167671-139167752	+	CE	0.98923	0.98923	4.1443e-06	0.525	K0	0
Dennd1b	28	chr1:139167753-139167756	+	AD	0.96387	0.979	-0.015136	0.667	K1	0.2775
Dennd1b	29	chr1:139168832-139169048	+	CE	0.98739	0.9885	-0.0011129	0.528	K0	0
Nbeal1	4	chr1:60181463-60181754	+	CE	0.97563	0.97319	0.0024421	0.539	K0	0
Nbeal1	5	chr1:60194504-60194595	+	CE	0.98364	0.98193	0.0017067	0.563	K0	0
Nbeal1	6	chr1:60195015-60195176	+	CE	0.98341	0.98131	0.0021084	0.536	K0	0
Nbeal1	7	chr1:60200105-60200186	+	CE	0.9878	0.98666	0.0011366	0.501	K0	0
Nbeal1	8	chr1:60200864-60200991	+	CE	0.98741	0.98596	0.0014419	0.523	K0	0
Nbeal1	9	chr1:60206334-60206416	+	CE	0.97596	0.96689	0.0090741	0.556	K0	0
Nbeal1	10	chr1:60207923-60215308	+	CE	0.30056	0.45189	-0.15133	0.735	K3	2.189
Nbeal1	11	chr1:60217196-60217281	+	CE	0.94095	0.74957	0.19138	0.957	K2	1.5318
Nbeal1	13	chr1:60222067-60222068	+	AA	0.91852	0.89545	0.023076	0.598	K0	0
Nbeal1	14	chr1:60222069-60222373	+	CE	0.98076	0.97397	0.0067867	0.588	K0	0
Nbeal1	15	chr1:60224625-60224731	+	CE	0.98839	0.98368	0.0047064	0.614	K0	0
Nbeal1	16	chr1:60224732-60225821	+	AD	0.18252	0.20321	-0.020697	0.533	K1	0.8202
Nbeal1	17	chr1:60225822-60226505	+	AD	0.1824	0.20666	-0.024264	0.574	K1	0.8202
Nbeal1	18	chr1:60230602-60230685	+	CE	0.98799	0.98124	0.00675	0.619	K0	0
Nbeal1	19	chr1:60234797-60234895	+	CE	0.98912	0.98625	0.0028643	0.553	K0	0
Nbeal1	20	chr1:60234981-60235561	+	CE	0.98262	0.98267	-5.8776e-05	0.519	K0	0
Nbeal1	21	chr1:60236371-60236381	+	AA	0.94112	0.84952	0.091601	0.763	K1	0.8071
Nbeal1	22	chr1:60236382-60236503	+	CE	0.97862	0.979	-0.00037617	0.522	K0	0
Nbeal1	23	chr1:60236504-60236659	+	AD	0.08303	0.13028	-0.047249	0.672	K1	0.6966
Nbeal1	24	chr1:60237097-60237216	+	CE	0.98637	0.98115	0.0052171	0.586	K0	0
Nbeal1	25	chr1:60238572-60238875	+	CE	0.98762	0.98472	0.0029028	0.555	K0	0
Nbeal1	26	chr1:60242539-60242624	+	CE	0.98941	0.98907	0.00033471	0.501	K0	0
Nbeal1	27	chr1:60242625-60244556	+	AD	0.11384	0.026063	0.087777	0.955	K2	0.5566
Nbeal1	28	chr1:60244794-60244883	+	CE	0.9938	0.98685	0.006944	0.663	K1	0.1334
Nbeal1	29	chr1:60247616-60247784	+	CE	0.99461	0.99423	0.00037605	0.535	K0	0
Nbeal1	30	chr1:60248363-60248496	+	CE	0.99243	0.99039	0.0020451	0.607	K0	0
Nbeal1	31	chr1:60251035-60251194	+	CE	0.99117	0.98913	0.0020384	0.546	K0	0
Nbeal1	32	chr1:60251304-60251406	+	CE	0.9924	0.98975	0.0026472	0.564	K0	0
Nbeal1	33	chr1:60253352-60253508	+	CE	0.99241	0.98795	0.0044621	0.627	K0	0
Nbeal1	34	chr1:60254894-60255052	+	CE	0.99062	0.98816	0.0024521	0.57	K0	0
Nbeal1	35	chr1:60257430-60257589	+	CE	0.98764	0.98628	0.0013579	0.554	K0	0
Nbeal1	36	chr1:60258650-60258738	+	CE	0.9768	0.98492	-0.008112	0.69	K1	0.1717
Nbeal1	37	chr1:60260233-60260793	+	CE	0.99309	0.98817	0.0049213	0.606	K0	0
Nbeal1	38	chr1:60261410-60261585	+	CE	0.99314	0.98809	0.0050419	0.648	K0	0
Nbeal1	39	chr1:60264279-60264432	+	CE	0.992	0.98789	0.0041044	0.587	K0	0
Nbeal1	40	chr1:60264882-60265010	+	CE	0.98711	0.98478	0.0023336	0.526	K0	0
Nbeal1	41	chr1:60267759-60268064	+	CE	0.98175	0.98105	0.00070148	0.518	K0	0
Nbeal1	42	chr1:60268383-60268532	+	CE	0.99077	0.98794	0.0028303	0.605	K0	0
Nbeal1	43	chr1:60270272-60270429	+	CE	0.99172	0.98708	0.0046422	0.61	K0	0
Nbeal1	44	chr1:60272133-60272257	+	CE	0.99017	0.98653	0.0036349	0.569	K0	0
Nbeal1	45	chr1:60277125-60277251	+	CE	0.99303	0.99213	0.00090249	0.512	K0	0
Nbeal1	46	chr1:60277913-60278061	+	CE	0.99292	0.99167	0.001256	0.556	K0	0
Nbeal1	47	chr1:60278667-60278800	+	CE	0.98958	0.98831	0.0012694	0.507	K0	0
Nbeal1	48	chr1:60279699-60279800	+	CE	0.98785	0.98649	0.001359	0.563	K0	0
Nbeal1	49	chr1:60279801-60280138	+	AD	0.17969	0.22197	-0.042275	0.597	K2	0.8786
Nbeal1	50	chr1:60280139-60281175	+	AD	0.13646	0.2234	-0.086941	0.753	K2	0.8786
Nbeal1	51	chr1:60281247-60281342	+	CE	0.87428	0.98407	-0.1098	0.986	K2	0.6948
Nbeal1	52	chr1:60281825-60281949	+	CE	0.99064	0.98586	0.0047849	0.602	K0	0
Nbeal1	53	chr1:60283983-60284123	+	CE	0.98992	0.97924	0.010679	0.691	K0	0
Nbeal1	54	chr1:60287311-60287441	+	CE	0.98881	0.96974	0.019069	0.66	K0	0
Nbeal1	55	chr1:60289915-60290024	+	CE	0.98942	0.9796	0.0098213	0.656	K0	0
Nbeal1	56	chr1:60291834-60291951	+	CE	0.9892	0.98291	0.0062899	0.621	K0	0
Nbeal1	57	chr1:60292867-60292964	+	CE	0.98868	0.98397	0.0047063	0.615	K0	0
Nbeal1	58	chr1:60295879-60295995	+	CE	0.98751	0.98146	0.0060458	0.631	K0	0
Nbeal1	59	chr1:60305275-60305364	+	CE	0.98333	0.97472	0.0086103	0.545	K0	0
Nbeal1	60	chr1:60310204-60310313	+	CE	0.98719	0.9807	0.0064957	0.602	K0	0
Nbeal1	61	chr1:60310927-60311099	+	CE	0.9886	0.98567	0.0029249	0.59	K0	0
Nbeal1	62	chr1:60312151-60312245	+	CE	0.98701	0.98382	0.0031986	0.614	K0	0
Nbeal1	63	chr1:60319317-60319433	+	CE	0.98833	0.9792	0.0091299	0.644	K0	0
Nbeal1	64	chr1:60319671-60319832	+	CE	0.98716	0.97602	0.011139	0.637	K0	0
Nbeal1	65	chr1:60328060-60328208	+	CE	0.9822	0.97291	0.0092941	0.609	K0	0
Nbeal1	66	chr1:60329327-60329462	+	CE	0.98842	0.98558	0.0028362	0.571	K0	0
Iars2	2	chr1:185327620-185327742	-	CE	0.99571	0.99415	0.0015652	0.543	K0	0
Iars2	3	chr1:185325503-185325662	-	CE	0.99682	0.99584	0.00098027	0.539	K0	0
Iars2	4	chr1:185323667-185323815	-	CE	0.99564	0.99478	0.0008541	0.537	K0	0
Iars2	5	chr1:185323186-185323235	-	CE	0.99494	0.9932	0.0017376	0.562	K0	0
Iars2	6	chr1:185322993-185323102	-	CE	0.99602	0.99418	0.0018404	0.604	K0	0
Iars2	7	chr1:185322821-185322911	-	CE	0.99572	0.99492	0.00080437	0.521	K0	0
Iars2	8	chr1:185322400-185322515	-	CE	0.99445	0.99379	0.00066347	0.516	K0	0
Iars2	9	chr1:185320881-185321006	-	CE	0.9938	0.99281	0.00099369	0.53	K0	0
Iars2	10	chr1:185320837-185320880	-	AD	0.99352	0.96766	0.02586	0.889	K1	0.3163
Iars2	11	chr1:185318564-185318654	-	CE	0.99321	0.99161	0.0016072	0.577	K0	0
Iars2	12	chr1:185317951-185317958	-	AA	0.99262	0.99063	0.0019896	0.534	K0	0
Iars2	13	chr1:185317807-185317950	-	CE	0.9935	0.99179	0.0017118	0.555	K0	0
Iars2	14	chr1:185315894-185316054	-	CE	0.99457	0.9928	0.0017698	0.583	K0	0
Iars2	15	chr1:185311846-185312527	-	AL	0.0094751	0.030122	-0.020646	0.773	K2	0.5617
Iars2	16	chr1:185303299-185303401	-	CE	0.99424	0.96422	0.030018	0.942	K1	0.277
Iars2	17	chr1:185302708-185302801	-	CE	0.99371	0.96499	0.028718	0.913	K1	0.277
Iars2	18	chr1:185297473-185297581	-	CE	0.9932	0.99256	0.00063882	0.523	K0	0
Iars2	19	chr1:185296509-185296513	-	AA	0.99236	0.98996	0.0024014	0.527	K0	0
Iars2	20	chr1:185296411-185296508	-	CE	0.99394	0.99216	0.0017746	0.536	K0	0
Iars2	21	chr1:185295555-185295680	-	CE	0.99483	0.99361	0.001212	0.531	K0	0
Iars2	23	chr1:185294744-185294875	-	CE	0.99378	0.99324	0.00054181	0.506	K0	0
Iars2	24	chr1:185291319-185291425	-	CE	0.99231	0.99238	-6.2032e-05	0.526	K0	0
Iars2	25	chr1:185290486-185290631	-	CE	0.99345	0.99225	0.001192	0.528	K0	0
Iars2	26	chr1:185289353-185289543	-	CE	0.99444	0.99318	0.0012622	0.562	K0	0
Iars2	27	chr1:185288040-185288184	-	CE	0.99538	0.99386	0.0015163	0.572	K0	0
Stk16	2	chr1:75211025-75211052	+	AD	0.5271	0.51979	0.0073145	0.556	K2	1.2635
Stk16	3	chr1:75211053-75211158	+	AD	0.042634	0.052084	-0.0094495	0.561	K2	1.2635
Stk16	4	chr1:75211240-75211414	+	CE	0.99706	0.9964	0.00065794	0.531	K0	0
Stk16	5	chr1:75211925-75212144	+	CE	0.99766	0.99694	0.00072174	0.559	K0	0
Stk16	6	chr1:75212600-75212733	+	CE	0.98596	0.99574	-0.0097784	0.803	K1	0.1516
Stk16	7	chr1:75212886-75213006	+	CE	0.99466	0.99345	0.0012078	0.521	K0	0
Stk16	8	chr1:75213133-75213228	+	CE	0.83016	0.8342	-0.0040443	0.573	K1	0.76
Stk16	9	chr1:75213576-75213697	+	CE	0.99605	0.99432	0.0017281	0.599	K0	0
Aldh9a1	2	chr1:167350417-167350447	+	AD	0.012867	0.028887	-0.01602	0.671	K1	0.2447
Aldh9a1	3	chr1:167352520-167352665	+	CE	0.99455	0.99288	0.0016754	0.558	K0	0
Aldh9a1	4	chr1:167352666-167354051	+	AD	0.032763	0.047937	-0.015174	0.632	K1	0.3704
Aldh9a1	5	chr1:167354427-167354556	+	CE	0.99336	0.99126	0.002101	0.527	K0	0
Aldh9a1	6	chr1:167355672-167355806	+	CE	0.96211	0.98964	-0.02753	0.812	K1	0.3291
Aldh9a1	7	chr1:167355807-167356195	+	AD	0.071912	0.048235	0.023677	0.735	K2	0.6669
Aldh9a1	8	chr1:167356530-167356726	+	CE	0.99548	0.99359	0.001896	0.574	K0	0
Aldh9a1	9	chr1:167357310-167357450	+	CE	0.99579	0.99445	0.0013354	0.576	K0	0
Aldh9a1	10	chr1:167361403-167361591	+	CE	0.99498	0.99422	0.00076532	0.533	K0	0
Aldh9a1	11	chr1:167361804-167361891	+	CE	0.99597	0.99536	0.00060135	0.534	K0	0
Aldh9a1	12	chr1:167364508-167364649	+	CE	0.99596	0.99527	0.00068786	0.512	K0	0
Aldh9a1	13	chr1:167365775-167365887	+	CE	0.99572	0.99483	0.00088214	0.525	K0	0
Kctd3	2	chr1:189001905-189001958	-	CE	0.96894	0.97042	-0.001478	0.539	K0	0
Kctd3	3	chr1:189001343-189001388	-	CE	0.97592	0.97569	0.00022776	0.514	K0	0
Kctd3	4	chr1:189000253-189000326	-	CE	0.98298	0.97815	0.0048204	0.544	K0	0
Kctd3	5	chr1:188997783-189000252	-	AD	0.17356	0.16379	0.0097679	0.595	K1	0.8542
Kctd3	6	chr1:188997277-188997335	-	CE	0.98364	0.98224	0.0014023	0.514	K0	0
Kctd3	7	chr1:188996962-188997042	-	CE	0.98536	0.98486	0.00050368	0.506	K0	0
Kctd3	8	chr1:188996400-188996540	-	CE	0.98717	0.98343	0.0037363	0.579	K0	0
Kctd3	9	chr1:188995742-188995832	-	CE	0.98586	0.98411	0.0017503	0.508	K0	0
Kctd3	10	chr1:188992563-188992753	-	CE	0.93798	0.93574	0.0022346	0.537	K2	0.5111
Kctd3	11	chr1:188987516-188987631	-	CE	0.93187	0.93635	-0.0044778	0.555	K3	1.2359
Kctd3	12	chr1:188983207-188983294	-	CE	0.94961	0.89764	0.051972	0.712	K2	1.2359
Kctd3	13	chr1:188983010-188983126	-	CE	0.96259	0.93968	0.022905	0.635	K2	0.8291
Kctd3	14	chr1:188981225-188981395	-	CE	0.98456	0.98138	0.0031789	0.502	K0	0
Kctd3	15	chr1:188978497-188978652	-	CE	0.98367	0.98362	4.5194e-05	0.516	K0	0
Kctd3	16	chr1:188976611-188976707	-	CE	0.95563	0.91182	0.043804	0.777	K1	0.4712
Kctd3	17	chr1:188976371-188976559	-	CE	0.11795	0.079942	0.038006	0.699	K1	0.5787
Kctd3	18	chr1:188974287-188974471	-	CE	0.97986	0.97515	0.0047045	0.579	K0	0
Kctd3	19	chr1:188974066-188974204	-	CE	0.97796	0.97674	0.0012169	0.52	K0	0
Gpr55	2	chr1:85959605-85960834	-	AD	0.29362	0.60472	-0.31109	0.828	K2	1.5604
Gpr55	3	chr1:85957741-85959604	-	AD	0.28377	0.35752	-0.073756	0.673	K2	1.5604
Cnot9	2	chr1:74506215-74506461	+	AD	0.92408	0.90257	0.021516	0.561	K0	0
Cnot9	5	chr1:74518901-74519016	+	CE	0.87905	0.92287	-0.043823	0.613	K0	0
Cnot9	6	chr1:74522318-74522427	+	CE	0.96394	0.93423	0.029701	0.64	K0	0
Cnot9	7	chr1:74523504-74523613	+	CE	0.97005	0.94316	0.026885	0.603	K0	0
Cnot9	8	chr1:74526992-74527090	+	CE	0.97135	0.94863	0.022716	0.637	K0	0
Cnot9	9	chr1:74527592-74527683	+	CE	0.96959	0.94998	0.019609	0.631	K0	0
Hjurp	1	chr1:88277558-88277633	-	TS	0.0020878	0.0024427	-0.00035489	0.567	K2	0.9769
Hjurp	2	chr1:88277507-88277557	-	TS	0.86004	0.61985	0.24019	1	K2	0.9769
Hjurp	3	chr1:88277374-88277506	-	TS	0.13873	0.38063	-0.24189	1	K2	0.9769
Hjurp	4	chr1:88277219-88277285	-	CE	0.99905	0.99863	0.0004176	0.552	K0	0
Hjurp	5	chr1:88275794-88277218	-	AD	0.18804	0.20512	-0.017075	0.586	K1	0.8121
Hjurp	6	chr1:88275042-88275097	-	CE	0.99855	0.99781	0.00073375	0.571	K0	0
[truncated: 148,359 more rows]

## Sheet: analysis_without_BAM_files_used
Gene	Node	Coord	Strand	Type	Psi_A	Psi_B	DeltaPsi	Probability	Complexity	Entropy
2310035C23Rik	1	chr1:105663883-105663912	+	TS	0.10249	0.064012	0.038477	0.548	K2	0.8832
2310035C23Rik	2	chr1:105663913-105663922	+	TS	0.87287	0.93629	-0.063415	0.64	K2	0.8832
2310035C23Rik	3	chr1:105663923-105664633	+	TS	0.026978	0.0023957	0.024582	0.811	K2	0.8832
2310035C23Rik	4	chr1:105678163-105678252	+	CE	0.99317	0.99326	-8.8126e-05	0.504	K0	0
2310035C23Rik	5	chr1:105686949-105687020	+	CE	0.9674	0.92417	0.043232	0.764	K4	1.8319
2310035C23Rik	6	chr1:105687130-105687185	+	CE	0.97939	0.96148	0.017912	0.726	K4	1.8319
2310035C23Rik	7	chr1:105687282-105687395	+	CE	0.98136	0.96314	0.018222	0.718	K4	1.8319
2310035C23Rik	8	chr1:105691906-105692109	+	CE	0.9856	0.96402	0.02158	0.805	K4	1.8319
2310035C23Rik	9	chr1:105692212-105692303	+	CE	0.70642	0.64582	0.060601	0.714	K4	1.8319
2310035C23Rik	10	chr1:105692884-105693177	+	CE	0.98662	0.96196	0.024668	0.81	K4	1.8319
2310035C23Rik	11	chr1:105695428-105695503	+	CE	0.93561	0.9162	0.019405	0.664	K4	1.8319
2310035C23Rik	12	chr1:105696501-105696596	+	CE	0.9848	0.96246	0.022345	0.814	K4	1.8319
2310035C23Rik	13	chr1:105703931-105704043	+	CE	0.99495	0.99507	-0.0001203	0.537	K0	0
2310035C23Rik	14	chr1:105713849-105713939	+	CE	0.99456	0.99482	-0.00026226	0.507	K0	0
2310035C23Rik	15	chr1:105716778-105716849	+	CE	0.99342	0.99305	0.00036735	0.538	K0	0
2310035C23Rik	16	chr1:105718775-105718915	+	CE	0.9942	0.98934	0.0048598	0.683	K1	0.0938
2310035C23Rik	17	chr1:105719452-105719616	+	CE	0.99438	0.99347	0.00091141	0.519	K0	0
2310035C23Rik	18	chr1:105721268-105721415	+	CE	0.60263	0.59763	0.0049993	0.52	K2	1.1281
2310035C23Rik	19	chr1:105725649-105725805	+	CE	0.9911	0.9825	0.0085978	0.634	K2	1.1281
2310035C23Rik	20	chr1:105726343-105726466	+	CE	0.98333	0.95621	0.02712	0.841	K2	1.1281
2310035C23Rik	21	chr1:105727940-105727988	+	CE	0.98926	0.98107	0.008192	0.595	K2	1.1281
2310035C23Rik	22	chr1:105731201-105731280	+	CE	0.97025	0.93805	0.032203	0.79	K2	1.1281
2310035C23Rik	23	chr1:105734518-105734624	+	CE	0.98901	0.97966	0.0093514	0.672	K2	1.1281
2310035C23Rik	24	chr1:105735923-105736022	+	CE	0.98863	0.99027	-0.0016421	0.548	K0	0
2310035C23Rik	25	chr1:105740435-105740517	+	CE	0.41944	0.48715	-0.067708	0.728	K3	1.9649
2310035C23Rik	26	chr1:105741013-105741095	+	CE	0.7504	0.7149	0.035496	0.655	K3	1.9649
2310035C23Rik	27	chr1:105741297-105741360	+	CE	0.98115	0.97591	0.0052383	0.581	K3	1.9649
2310035C23Rik	28	chr1:105743211-105743349	+	CE	0.99253	0.99314	-0.00060444	0.533	K0	0
2310035C23Rik	29	chr1:105746069-105746185	+	CE	0.99168	0.99222	-0.00054267	0.509	K0	0
2310035C23Rik	30	chr1:105750322-105750410	+	CE	0.99222	0.9925	-0.00027723	0.506	K0	0
2310035C23Rik	31	chr1:105750973-105751043	+	CE	0.97171	0.92162	0.050088	0.819	K1	0.585
2310035C23Rik	32	chr1:105753503-105753711	+	TE	0.29615	0.085382	0.21077	0.995	K2	0.9632
2310035C23Rik	33	chr1:105753712-105754075	+	TE	0.0010504	0.0010605	-1.0075e-05	0.507	K2	0.9632
2310035C23Rik	34	chr1:105754076-105755191	+	TE	0.70378	0.91451	-0.21072	0.995	K2	0.9632
Farsb	1	chr1:78488860-78488897	-	TS	0.94229	0.90677	0.035522	0.625	K1	0.1073
Farsb	2	chr1:78488785-78488859	-	TS	0.059605	0.090996	-0.031391	0.642	K1	0.1073
Farsb	3	chr1:78482308-78482363	-	CE	0.99707	0.99691	0.00016185	0.503	K0	0
Farsb	4	chr1:78479957-78480111	-	CE	0.99638	0.99588	0.00049408	0.515	K0	0
Farsb	5	chr1:78478193-78478262	-	CE	0.99541	0.99508	0.00033417	0.543	K0	0
Farsb	6	chr1:78476190-78476305	-	CE	0.99542	0.99525	0.00016247	0.506	K0	0
Farsb	7	chr1:78472484-78472634	-	CE	0.9968	0.99631	0.00048505	0.535	K0	0
Farsb	8	chr1:78471083-78471191	-	CE	0.99728	0.99636	0.00092431	0.535	K0	0
Farsb	9	chr1:78469252-78469322	-	CE	0.99699	0.99625	0.00073631	0.547	K0	0
Farsb	10	chr1:78467971-78468032	-	CE	0.99742	0.99682	0.00059948	0.528	K0	0
Farsb	11	chr1:78466967-78467018	-	CE	0.99762	0.99596	0.0016609	0.573	K0	0
Farsb	12	chr1:78463272-78463333	-	CE	0.99375	0.99615	-0.0024013	0.672	K1	0.0729
Farsb	13	chr1:78462835-78463042	-	CE	0.99349	0.99645	-0.0029626	0.685	K1	0.0729
Farsb	14	chr1:78462306-78462386	-	CE	0.99314	0.9957	-0.002559	0.665	K1	0.0729
Farsb	15	chr1:78458565-78458657	-	CE	0.99641	0.99578	0.00063177	0.508	K0	0
Farsb	16	chr1:78454754-78454871	-	CE	0.99639	0.99573	0.0006628	0.549	K0	0
Farsb	17	chr1:78443635-78443790	-	CE	0.99592	0.9952	0.00072444	0.542	K0	0
Farsb	18	chr1:78425193-78425345	-	CE	0.99604	0.99469	0.0013503	0.569	K0	0
Tmem63a	2	chr1:180944035-180944096	+	AF	0.079107	0.090165	-0.011057	0.506	K0	0
Tmem63a	3	chr1:180946566-180946765	+	CE	0.96033	0.9535	0.0068307	0.514	K0	0
Tmem63a	4	chr1:180948813-180948892	+	CE	0.97106	0.9623	0.0087575	0.546	K0	0
Tmem63a	5	chr1:180952132-180952195	+	CE	0.97286	0.96975	0.0031112	0.502	K0	0
Tmem63a	6	chr1:180952981-180953018	+	CE	0.97984	0.97647	0.0033711	0.503	K0	0
Tmem63a	7	chr1:180954808-180954950	+	CE	0.98409	0.98209	0.0020015	0.508	K0	0
Tmem63a	8	chr1:180955993-180956044	+	CE	0.98512	0.9825	0.0026261	0.521	K0	0
Tmem63a	9	chr1:180956420-180956528	+	CE	0.97822	0.97474	0.0034811	0.535	K0	0
Tmem63a	10	chr1:180957977-180958047	+	CE	0.98085	0.98026	0.0005912	0.51	K0	0
Tmem63a	11	chr1:180960426-180960506	+	CE	0.97862	0.98645	-0.0078347	0.639	K1	0.1929
Tmem63a	12	chr1:180960735-180960858	+	CE	0.98837	0.98547	0.0029002	0.541	K0	0
Tmem63a	13	chr1:180961048-180961181	+	CE	0.97916	0.98253	-0.0033672	0.579	K1	0.152
Tmem63a	14	chr1:180962347-180962484	+	CE	0.98391	0.98031	0.0035998	0.533	K0	0
Tmem63a	15	chr1:180962999-180963152	+	CE	0.98536	0.98026	0.0050996	0.574	K0	0
Tmem63a	16	chr1:180965540-180965646	+	CE	0.9844	0.97562	0.0087766	0.596	K0	0
Tmem63a	17	chr1:180965744-180965830	+	CE	0.98109	0.97072	0.010371	0.599	K0	0
Tmem63a	18	chr1:180966468-180966530	+	CE	0.97962	0.97377	0.0058442	0.594	K0	0
Tmem63a	19	chr1:180968745-180968907	+	CE	0.98154	0.97474	0.006798	0.568	K0	0
Tmem63a	20	chr1:180970180-180970285	+	CE	0.98216	0.97017	0.011988	0.62	K0	0
Tmem63a	21	chr1:180971967-180972134	+	CE	0.9825	0.97208	0.010417	0.61	K0	0
Tmem63a	22	chr1:180972716-180972831	+	CE	0.97806	0.97644	0.0016247	0.536	K0	0
Tmem63a	23	chr1:180973140-180973202	+	CE	0.97909	0.97924	-0.00014432	0.54	K0	0
Tmem63a	24	chr1:180974169-180975103	+	TE	0.0091627	0.0045455	0.0046172	0.623	K1	0.1235
Tmem63a	25	chr1:180975104-180975112	+	TE	0.99091	0.99532	-0.004411	0.617	K1	0.1235
Raph1	4	chr1:60533287-60533406	-	CE	0.89413	0.87614	0.01799	0.532	K0	0
Raph1	5	chr1:60527384-60527489	-	CE	0.93879	0.93667	0.0021184	0.509	K0	0
Raph1	6	chr1:60525592-60526100	-	CE	0.94547	0.94391	0.0015619	0.521	K0	0
Raph1	7	chr1:60518980-60519060	-	CE	0.19763	0.13483	0.062796	0.615	K2	1.0027
Raph1	8	chr1:60510417-60510491	-	CE	0.20454	0.18589	0.018656	0.526	K1	0.8249
Raph1	9	chr1:60503518-60503595	-	CE	0.9038	0.93033	-0.026532	0.574	K0	0
Raph1	10	chr1:60502825-60502984	-	CE	0.88553	0.91502	-0.029496	0.565	K0	0
Raph1	11	chr1:60501756-60501877	-	CE	0.90614	0.92361	-0.017463	0.565	K0	0
Raph1	12	chr1:60500555-60500620	-	CE	0.93471	0.94568	-0.010976	0.529	K0	0
Raph1	13	chr1:60499480-60499623	-	CE	0.92649	0.9551	-0.028603	0.623	K0	0
Raph1	14	chr1:60498424-60498534	-	CE	0.89931	0.93996	-0.040652	0.601	K0	0
Raph1	15	chr1:60496225-60496323	-	CE	0.91152	0.91146	5.6135e-05	0.519	K0	0
Raph1	16	chr1:60495415-60495535	-	CE	0.89661	0.8995	-0.0028884	0.505	K0	0
Raph1	17	chr1:60493538-60493680	-	CE	0.90141	0.90451	-0.0030978	0.504	K0	0
Raph1	20	chr1:60483236-60483340	-	TE	0.31831	0.25836	0.059954	0.501	K1	0.8509
Raph1	21	chr1:60482292-60483235	-	TE	0.68043	0.74263	-0.062199	0.506	K1	0.8509
Imp4	2	chr1:34440041-34440149	+	CE	0.99319	0.99258	0.00061454	0.516	K0	0
Imp4	3	chr1:34442910-34442993	+	CE	0.99418	0.99297	0.0012097	0.554	K0	0
Imp4	4	chr1:34443378-34443487	+	CE	0.99526	0.99463	0.00062914	0.53	K0	0
Imp4	5	chr1:34443563-34443695	+	CE	0.99524	0.99496	0.00027835	0.503	K0	0
Imp4	6	chr1:34443769-34443923	+	CE	0.99504	0.9948	0.00023986	0.501	K0	0
Imp4	7	chr1:34443997-34444091	+	CE	0.99545	0.99516	0.00029295	0.517	K0	0
Imp4	8	chr1:34444196-34444269	+	CE	0.99536	0.99446	0.00089901	0.535	K0	0
Kansl3	6	chr1:36367769-36367911	-	CE	0.98762	0.98608	0.0015402	0.527	K0	0
Kansl3	7	chr1:36367750-36367768	-	AD	0.52179	0.41729	0.1045	0.657	K1	0.9973
Kansl3	8	chr1:36365653-36365690	-	AA	0.25314	0.27085	-0.017705	0.611	K2	1.5174
Kansl3	9	chr1:36365645-36365652	-	AA	0.9709	0.97931	-0.008406	0.603	K0	0
Kansl3	12	chr1:36358370-36358460	-	CE	0.99243	0.99249	-5.6505e-05	0.52	K0	0
Kansl3	13	chr1:36358040-36358225	-	CE	0.99223	0.99209	0.00013742	0.517	K0	0
Kansl3	14	chr1:36354649-36354780	-	CE	0.99173	0.98968	0.0020457	0.562	K0	0
Kansl3	15	chr1:36354098-36354214	-	CE	0.99349	0.99237	0.0011226	0.549	K0	0
Kansl3	16	chr1:36353772-36353873	-	CE	0.99445	0.99405	0.00040157	0.52	K0	0
Kansl3	17	chr1:36353594-36353665	-	CE	0.99421	0.99416	5.4465e-05	0.505	K0	0
Kansl3	18	chr1:36351926-36352000	-	CE	0.99517	0.99467	0.00050125	0.544	K0	0
Kansl3	19	chr1:36351633-36351790	-	CE	0.99522	0.99513	8.931e-05	0.52	K0	0
Kansl3	20	chr1:36349402-36349465	-	CE	0.99305	0.99278	0.00027282	0.506	K0	0
Kansl3	21	chr1:36348818-36349018	-	CE	0.99315	0.99135	0.0017974	0.525	K0	0
Kansl3	22	chr1:36348525-36348681	-	CE	0.9943	0.99383	0.00046842	0.532	K0	0
Kansl3	23	chr1:36347217-36347294	-	CE	0.16032	0.11523	0.045089	0.776	K1	0.6956
Kansl3	24	chr1:36345838-36346029	-	CE	0.99372	0.99412	-0.00040124	0.506	K0	0
Kansl3	25	chr1:36345385-36345466	-	CE	0.99236	0.99182	0.00053982	0.536	K0	0
Kansl3	26	chr1:36344916-36345046	-	CE	0.99	0.99064	-0.00063322	0.55	K0	0
Kansl3	27	chr1:36344070-36344179	-	CE	0.99056	0.99211	-0.0015461	0.544	K0	0
Kansl3	28	chr1:36343673-36343895	-	CE	0.99299	0.99364	-0.00065654	0.528	K0	0
Kansl3	29	chr1:36343251-36343384	-	CE	0.99403	0.99415	-0.00012123	0.512	K0	0
Kansl3	30	chr1:36337573-36337651	-	TE	0.77215	0.71514	0.057008	0.896	K1	0.9156
Kansl3	31	chr1:36335730-36337572	-	TE	0.22819	0.28447	-0.056282	0.881	K1	0.9156
Zbtb18	1	chr1:177444295-177444652	+	TS	0.0062803	0.0050153	0.001265	0.546	K1	0
Zbtb18	2	chr1:177444653-177444822	+	TS	0.99394	0.9948	-0.00085592	0.567	K1	0
Zbtb18	3	chr1:177444938-177445055	+	AF	0.059891	0.060732	-0.00084162	0.532	K0	0
Zbtb18	5	chr1:177447089-177447776	+	CE	0.99438	0.99473	-0.0003509	0.527	K0	0
Zbtb18	6	chr1:177447777-177447888	+	RI	0.6271	0.64061	-0.013504	0.565	K1	0.9838
Zbtb18	7	chr1:177447889-177450760	+	TE	0.00032047	0.00024941	7.106e-05	0.578	K1	0
Zbtb18	8	chr1:177450761-177450764	+	TE	0.99969	0.99974	-4.7444e-05	0.56	K1	0
Lbr	2	chr1:181838378-181838556	-	CE	0.99943	0.99939	3.0719e-05	0.512	K0	0
Lbr	3	chr1:181836058-181836288	-	CE	0.99939	0.99939	2.7083e-06	0.52	K0	0
Lbr	4	chr1:181832149-181832232	-	CE	0.99948	0.99945	2.8606e-05	0.503	K0	0
Lbr	5	chr1:181831542-181831734	-	CE	0.99934	0.99932	2.4046e-05	0.517	K0	0
Lbr	6	chr1:181828712-181828908	-	CE	0.99893	0.99898	-4.6977e-05	0.528	K0	0
Lbr	7	chr1:181825622-181825676	-	CE	0.9989	0.99895	-5.6545e-05	0.55	K0	0
Lbr	8	chr1:181821436-181821627	-	CE	0.99921	0.99918	2.7509e-05	0.539	K0	0
Lbr	9	chr1:181820674-181820777	-	CE	0.99929	0.99928	5.74e-06	0.518	K0	0
Lbr	10	chr1:181819864-181819989	-	CE	0.99927	0.99926	7.1567e-06	0.539	K0	0
Lbr	11	chr1:181818840-181819008	-	CE	0.99935	0.99932	2.1263e-05	0.514	K0	0
Lbr	12	chr1:181817489-181817569	-	CE	0.99944	0.99949	-4.5836e-05	0.525	K0	0
Lbr	13	chr1:181817265-181817387	-	CE	0.99951	0.99954	-2.4014e-05	0.507	K0	0
3110009E18Rik	1	chr1:120121187-120121194	+	TS	0.060794	0.054335	0.0064587	0.529	K2	0
3110009E18Rik	2	chr1:120121195-120121199	+	TS	0.062966	0.054231	0.0087342	0.536	K2	0
3110009E18Rik	3	chr1:120121200-120121217	+	TS	0.93931	0.94654	-0.0072322	0.502	K2	0
3110009E18Rik	4	chr1:120121218-120121810	+	AD	0.058933	0.053506	0.0054267	0.52	K0	0
3110009E18Rik	5	chr1:120150603-120150747	+	CE	0.96573	0.96416	0.0015713	0.516	K1	0.2673
3110009E18Rik	6	chr1:120160606-120160656	+	CE	0.98191	0.9818	0.00011466	0.522	K0	0
3110009E18Rik	7	chr1:120166135-120166172	+	CE	0.98279	0.98388	-0.0010935	0.564	K0	0
3110009E18Rik	8	chr1:120171401-120171482	+	CE	0.7874	0.87331	-0.085913	0.748	K1	0.9208
Dnm3	24	chr1:161990212-161992091	-	TE	0.109	0.0936	0.015397	0.558	K1	0
Dnm3	25	chr1:161987302-161990211	-	TE	0.88865	0.90643	-0.017777	0.524	K1	0
Tatdn3	1	chr1:191062906-191062932	-	TS	0.35117	0.36295	-0.011783	0.526	K2	0.5133
Tatdn3	2	chr1:191062905-191062905	-	TS	0.59588	0.57744	0.018438	0.548	K2	0.5133
Tatdn3	3	chr1:191062801-191062904	-	TS	0.10471	0.13431	-0.029606	0.579	K2	0.5133
Tatdn3	4	chr1:191061225-191061257	-	CE	0.96314	0.90715	0.055991	0.688	K1	0.7153
Tatdn3	5	chr1:191060113-191060186	-	CE	0.9603	0.90731	0.052995	0.637	K1	0.7153
Tatdn3	6	chr1:191058827-191058911	-	CE	0.96207	0.97246	-0.010393	0.56	K0	0
Tatdn3	7	chr1:191056363-191056425	-	CE	0.97547	0.98039	-0.004922	0.561	K0	0
Tatdn3	8	chr1:191055262-191055371	-	CE	0.9721	0.96833	0.0037679	0.553	K0	0
Tatdn3	9	chr1:191054856-191054911	-	CE	0.93317	0.91347	0.019699	0.607	K0	0
Tatdn3	10	chr1:191052860-191052972	-	CE	0.82722	0.54074	0.28648	0.888	K2	1.9136
Tatdn3	11	chr1:191049360-191049362	-	AA	0.51991	0.53217	-0.012258	0.54	K2	1.9136
Tatdn3	12	chr1:191049282-191049359	-	CE	0.92733	0.95757	-0.030243	0.614	K0	0
Tatdn3	13	chr1:191046321-191046336	-	AA	0.092005	0.068011	0.023994	0.565	K0	0
Tatdn3	14	chr1:191045842-191046320	-	TE	0.97529	0.66065	0.31464	0.561	K2	0
Tatdn3	15	chr1:191045838-191045841	-	TE	0.025705	0.33906	-0.31336	0.547	K2	0
Tatdn3	16	chr1:191045826-191045837	-	TE	0.024948	0.024252	0.00069649	0.51	K2	0
Uck2	2	chr1:167237489-167237648	-	CE	0.99792	0.9982	-0.0002794	0.561	K0	0
Uck2	3	chr1:167236603-167236699	-	CE	0.99839	0.99849	-0.00010327	0.514	K0	0
Uck2	4	chr1:167234692-167234834	-	CE	0.99848	0.99859	-0.00011156	0.519	K0	0
Uck2	5	chr1:167229893-167229990	-	CE	0.99029	0.97823	0.012056	0.78	K1	0.2097
Uck2	6	chr1:167227732-167227780	-	CE	0.99828	0.99833	-5.3991e-05	0.508	K0	0
Nck2	2	chr1:43509621-43509783	+	CE	0.99763	0.99111	0.0065149	0.761	K1	0.129
Nck2	3	chr1:43533552-43533793	+	CE	0.9984	0.99807	0.00032907	0.532	K0	0
Nck2	4	chr1:43553861-43554582	+	CE	0.99789	0.99721	0.00068187	0.56	K0	0
Pla2g4a	2	chr1:149932658-149932756	-	CE	0.87702	0.95656	-0.079534	0.66	K1	0.7747
Pla2g4a	3	chr1:149922244-149922439	-	AF	0.099339	0.072008	0.02733	0.603	K0	0
Pla2g4a	4	chr1:149922055-149922136	-	CE	0.87488	0.94576	-0.070886	0.641	K1	0.7747
Pla2g4a	5	chr1:149902294-149902442	-	CE	0.94156	0.939	0.0025568	0.507	K0	0
Pla2g4a	6	chr1:149901100-149901213	-	CE	0.94119	0.9218	0.01939	0.62	K0	0
Pla2g4a	7	chr1:149887607-149887644	-	CE	0.93159	0.9007	0.030887	0.577	K0	0
Pla2g4a	8	chr1:149886147-149886288	-	CE	0.95029	0.92483	0.025459	0.61	K0	0
Pla2g4a	9	chr1:149879990-149880126	-	CE	0.95061	0.93717	0.013438	0.554	K0	0
Pla2g4a	10	chr1:149872538-149872760	-	CE	0.94619	0.93624	0.0099443	0.569	K0	0
Pla2g4a	11	chr1:149871401-149871515	-	CE	0.9681	0.9287	0.039406	0.697	K0	0
Pla2g4a	12	chr1:149865116-149865253	-	CE	0.93631	0.91006	0.026246	0.595	K0	0
Pla2g4a	13	chr1:149864911-149865003	-	CE	0.94745	0.90842	0.039029	0.627	K0	0
Pla2g4a	14	chr1:149861055-149861126	-	CE	0.92983	0.89988	0.029947	0.576	K0	0
Pla2g4a	15	chr1:149857445-149857684	-	CE	0.90272	0.9059	-0.0031812	0.546	K0	0
Pla2g4a	16	chr1:149851267-149851451	-	CE	0.94244	0.9363	0.0061387	0.548	K0	0
Pla2g4a	17	chr1:149842164-149842359	-	CE	0.9475	0.90956	0.037938	0.641	K0	0
Pla2g4a	18	chr1:149840618-149840775	-	CE	0.96854	0.94034	0.028192	0.667	K0	0
Pla2g4a	19	chr1:149829636-149830192	-	TE	0.031706	0.34456	-0.31285	0.508	K1	0.0001
Pla2g4a	20	chr1:149829618-149829635	-	TE	0.9695	0.65636	0.31314	0.552	K1	0.0001
Ppp1r7	2	chr1:93346156-93346287	+	CE	0.99529	0.99353	0.0017651	0.604	K0	0
Ppp1r7	3	chr1:93350325-93350380	+	CE	0.98655	0.99341	-0.0068622	0.616	K1	0.173
Ppp1r7	4	chr1:93350949-93351014	+	CE	0.99399	0.99236	0.0016284	0.553	K0	0
Ppp1r7	5	chr1:93351506-93351636	+	CE	0.99549	0.99481	0.00067835	0.53	K0	0
Ppp1r7	6	chr1:93352517-93352679	+	CE	0.99646	0.99483	0.0016239	0.574	K0	0
Ppp1r7	7	chr1:93354329-93354445	+	CE	0.98318	0.98829	-0.0051107	0.643	K1	0.1656
Ppp1r7	8	chr1:93357757-93357861	+	CE	0.99501	0.99296	0.002048	0.54	K0	0
Ppp1r7	9	chr1:93360726-93360812	+	CE	0.99422	0.99192	0.002303	0.573	K0	0
Dcaf8	1	chr1:172148118-172148141	+	TS	0.019699	0.022225	-0.0025254	0.512	K1	0
Dcaf8	2	chr1:172148142-172148168	+	TS	0.981	0.97762	0.0033813	0.545	K1	0
Dcaf8	5	chr1:172148339-172149248	+	RI	0.089046	0.11798	-0.028939	0.764	K2	1.2364
Dcaf8	6	chr1:172149249-172149321	+	CE	0.99748	0.99733	0.0001529	0.506	K0	0
Dcaf8	7	chr1:172165848-172165918	+	CE	0.99396	0.998	-0.0040367	0.711	K1	0.0923
Dcaf8	8	chr1:172172329-172172981	+	CE	0.99784	0.99792	-7.3815e-05	0.505	K0	0
Dcaf8	9	chr1:172173943-172174083	+	CE	0.99774	0.99763	0.00010893	0.514	K0	0
Dcaf8	10	chr1:172175483-172175577	+	CE	0.99805	0.99829	-0.00023788	0.538	K0	0
Dcaf8	11	chr1:172179907-172180017	+	CE	0.99451	0.99843	-0.0039183	0.707	K1	0.0875
Dcaf8	12	chr1:172186296-172186368	+	CE	0.99781	0.99825	-0.00043665	0.541	K0	0
Dcaf8	13	chr1:172186855-172186912	+	CE	0.96329	0.96809	-0.0047978	0.501	K1	0.3736
Dcaf8	14	chr1:172187353-172187460	+	CE	0.99685	0.99688	-2.2738e-05	0.527	K0	0
Dcaf8	15	chr1:172188939-172189069	+	CE	0.98965	0.99672	-0.0070693	0.812	K1	0.0914
Dcaf8	16	chr1:172192518-172192637	+	CE	0.99756	0.99755	1.3666e-05	0.508	K0	0
Dcaf8	17	chr1:172193785-172193901	+	CE	0.99771	0.99759	0.00012611	0.5	K0	0
Dcaf8	18	chr1:172194556-172195466	+	TE	0.29209	0.32703	-0.034933	0.663	K2	1.314
Dcaf8	19	chr1:172195467-172195507	+	TE	0.070206	0.020196	0.050009	0.814	K2	1.314
Dcaf8	20	chr1:172195508-172196389	+	TE	0.63839	0.65339	-0.015003	0.545	K2	1.314
Angel2	3	chr1:190928492-190928717	+	AF	0.97541	0.97628	-0.00086648	0.502	K0	0
Angel2	4	chr1:190928718-190928758	+	AD	0.85182	0.96653	-0.11471	0.616	K2	1.5643
Angel2	5	chr1:190932867-190933192	+	CE	0.83476	0.88269	-0.047937	0.799	K2	1.5643
Angel2	6	chr1:190937444-190937700	+	CE	0.99739	0.99697	0.00041317	0.509	K0	0
Angel2	7	chr1:190939087-190939156	+	CE	0.99634	0.98691	0.0094305	0.712	K1	0.1671
Angel2	8	chr1:190940874-190941295	+	CE	0.99351	0.99258	0.00092599	0.52	K0	0
Angel2	9	chr1:190942121-190942247	+	CE	0.89657	0.8999	-0.0033331	0.544	K1	0.5784
Angel2	10	chr1:190942830-190942887	+	CE	0.99417	0.99427	-9.3305e-05	0.522	K0	0
Angel2	11	chr1:190943777-190943940	+	CE	0.99537	0.99541	-3.9619e-05	0.504	K0	0
Inpp5d	1	chr1:87620312-87620361	+	TS	0.0026502	0.0037814	-0.0011312	0.572	K2	0.4546
Inpp5d	2	chr1:87620362-87620398	+	TS	0.97158	0.94576	0.025815	0.714	K2	0.4546
Inpp5d	3	chr1:87620399-87620631	+	TS	0.028486	0.053342	-0.024856	0.684	K2	0.4546
Inpp5d	4	chr1:87635292-87635355	+	CE	0.9974	0.9882	0.009202	0.794	K1	0.1634
Inpp5d	5	chr1:87665387-87665537	+	CE	0.98681	0.97734	0.0094731	0.712	K2	1.1142
Inpp5d	6	chr1:87667889-87667891	+	AA	0.68619	0.68716	-0.00096697	0.501	K2	1.1142
Inpp5d	7	chr1:87667892-87668063	+	CE	0.99553	0.99453	0.00099887	0.556	K0	0
Inpp5d	8	chr1:87669642-87669782	+	CE	0.9959	0.99468	0.0012239	0.582	K0	0
Inpp5d	10	chr1:87676283-87676370	+	CE	0.99427	0.98367	0.010603	0.629	K2	0.2132
Inpp5d	11	chr1:87681489-87681569	+	CE	0.9972	0.99578	0.0014195	0.598	K0	0
Inpp5d	12	chr1:87681687-87681758	+	CE	0.99762	0.99654	0.0010812	0.572	K0	0
Inpp5d	13	chr1:87683743-87683866	+	CE	0.9979	0.99684	0.0010618	0.594	K0	0
Inpp5d	14	chr1:87691625-87691731	+	CE	0.99753	0.996	0.0015377	0.583	K0	0
Inpp5d	15	chr1:87695333-87695435	+	CE	0.99712	0.99558	0.0015324	0.598	K0	0
Inpp5d	16	chr1:87697349-87697545	+	CE	0.99677	0.99501	0.0017626	0.587	K0	0
Inpp5d	17	chr1:87698113-87698230	+	CE	0.99718	0.99582	0.0013635	0.596	K0	0
Inpp5d	18	chr1:87699028-87699124	+	CE	0.99684	0.99566	0.0011815	0.546	K0	0
Inpp5d	19	chr1:87699640-87699778	+	CE	0.99642	0.99523	0.0011833	0.559	K0	0
Inpp5d	20	chr1:87701160-87701268	+	CE	0.99722	0.99628	0.00094042	0.588	K0	0
Inpp5d	21	chr1:87701415-87701503	+	CE	0.99698	0.99588	0.0010944	0.566	K0	0
Inpp5d	22	chr1:87703118-87703199	+	CE	0.99675	0.99513	0.0016248	0.612	K0	0
Inpp5d	23	chr1:87705934-87706023	+	CE	0.99663	0.99514	0.0014879	0.589	K0	0
Inpp5d	24	chr1:87708096-87708209	+	CE	0.99718	0.99222	0.0049543	0.76	K1	0.0788
Inpp5d	25	chr1:87709618-87709700	+	CE	0.99746	0.99607	0.0013923	0.611	K0	0
Inpp5d	26	chr1:87711065-87711152	+	CE	0.99758	0.9931	0.0044726	0.722	K1	0.084
Inpp5d	27	chr1:87712031-87712180	+	CE	0.99773	0.99701	0.00072057	0.599	K0	0
Inpp5d	28	chr1:87713193-87713289	+	CE	0.99726	0.9967	0.00056899	0.542	K0	0
Inpp5d	29	chr1:87715038-87715093	+	CE	0.99261	0.99449	-0.001884	0.584	K2	0.885
Inpp5d	30	chr1:87715094-87715276	+	RI	0.80383	0.77181	0.032022	0.67	K2	0.885
Inpp5d	31	chr1:87715277-87715313	+	CE	0.99455	0.99252	0.0020372	0.56	K0	0
Inpp5d	32	chr1:87717690-87718284	+	CE	0.99645	0.99479	0.0016561	0.602	K0	0
Inpp5d	33	chr1:87719321-87719694	+	TE	0.02625	0.10872	-0.082473	0.944	K2	1.2678
Inpp5d	34	chr1:87719695-87720502	+	TE	0.77833	0.7027	0.075631	0.948	K2	1.2678
Inpp5d	35	chr1:87720503-87720503	+	TE	0.19515	0.1887	0.006456	0.634	K2	1.2678
Inpp5d	36	chr1:87720504-87720507	+	TE	0.0017818	0.0019833	-0.00020151	0.549	K2	1.2678
Tmem237	3	chr1:59119703-59119806	-	AF	0.7597	0.81091	-0.051205	0.627	K1	0.6405
Tmem237	4	chr1:59117975-59118006	-	CE	0.88981	0.83998	0.049834	0.611	K1	0.82
Tmem237	5	chr1:59117331-59117341	-	CE	0.87242	0.77116	0.10126	0.626	K2	1.4073
Tmem237	7	chr1:59115873-59115929	-	CE	0.93303	0.88457	0.04846	0.718	K2	1.4073
Tmem237	8	chr1:59114081-59114218	-	CE	0.95601	0.93856	0.017447	0.549	K0	0
Tmem237	9	chr1:59109988-59110105	-	CE	0.96615	0.95636	0.0097961	0.535	K0	0
Tmem237	10	chr1:59109039-59109196	-	CE	0.96191	0.95688	0.0050361	0.515	K0	0
Tmem237	11	chr1:59108675-59108798	-	CE	0.92907	0.93276	-0.0036929	0.557	K0	0
Tmem237	12	chr1:59108038-59108229	-	CE	0.95405	0.92071	0.03334	0.609	K0	0
Tmem237	13	chr1:59107454-59107527	-	CE	0.97306	0.94103	0.032031	0.65	K0	0
Tmem237	14	chr1:59106544-59106634	-	CE	0.94774	0.95123	-0.0034942	0.5	K0	0
Tmem237	15	chr1:59105546-59105667	-	CE	0.94742	0.9262	0.021224	0.514	K0	0
Tmem237	16	chr1:59100911-59101198	-	TE	0.45362	0.44062	0.012997	0.516	K2	0.9565
Tmem237	17	chr1:59100597-59100910	-	TE	0.023831	0.025863	-0.0020329	0.528	K2	0.9565
Tmem237	18	chr1:59100590-59100596	-	TE	0.54171	0.55754	-0.015829	0.553	K2	0.9565
Gorab	2	chr1:163396812-163397169	-	CE	0.93312	0.90233	0.030794	0.608	K0	0
Gorab	3	chr1:163394591-163394692	-	CE	0.93465	0.917	0.01765	0.595	K0	0
Gorab	4	chr1:163392410-163392550	-	CE	0.93879	0.94896	-0.010162	0.511	K0	0
Atic	2	chr1:71557497-71557623	+	CE	0.99662	0.99604	0.00057954	0.53	K0	0
Atic	3	chr1:71559226-71559302	+	CE	0.99691	0.99625	0.00065751	0.53	K0	0
Atic	4	chr1:71560889-71560955	+	CE	0.99673	0.99605	0.00067779	0.545	K0	0
Atic	5	chr1:71563759-71563847	+	CE	0.99653	0.99593	0.00060319	0.545	K0	0
Atic	6	chr1:71564406-71564557	+	CE	0.99712	0.99684	0.00027773	0.561	K0	0
Atic	7	chr1:71564811-71564967	+	CE	0.99765	0.99729	0.00036143	0.524	K0	0
Atic	8	chr1:71567814-71567939	+	CE	0.99756	0.99682	0.00073844	0.553	K0	0
Atic	9	chr1:71568963-71569070	+	CE	0.99709	0.99631	0.00078062	0.573	K0	0
Atic	10	chr1:71569840-71569925	+	CE	0.99807	0.99765	0.0004236	0.544	K0	0
Atic	11	chr1:71570840-71570929	+	CE	0.99826	0.998	0.00025749	0.57	K0	0
Atic	12	chr1:71572908-71573036	+	CE	0.99779	0.99759	0.00020418	0.507	K0	0
Atic	13	chr1:71576041-71576133	+	CE	0.99787	0.99747	0.00039063	0.537	K0	0
Atic	14	chr1:71576617-71576799	+	CE	0.99773	0.99756	0.00016412	0.542	K0	0
Atic	15	chr1:71577786-71577941	+	CE	0.99752	0.99716	0.00035578	0.573	K0	0
Paqr8	6	chr1:20934582-20935749	+	TE	0.014362	0.0061219	0.0082397	0.696	K2	1.0149
Paqr8	7	chr1:20935750-20935756	+	TE	0.013703	0.0057953	0.0079075	0.743	K2	1.0149
Paqr8	8	chr1:20935757-20939055	+	TE	0.54893	0.43623	0.1127	0.631	K2	1.0149
Paqr8	9	chr1:20939056-20939650	+	TE	0.43609	0.56291	-0.12682	0.615	K2	1.0149
Cops5	2	chr1:10034929-10035163	-	CE	0.99625	0.99558	0.00066431	0.55	K0	0
Cops5	3	chr1:10034008-10034136	-	CE	0.99566	0.99484	0.00082529	0.56	K0	0
Cops5	4	chr1:10033258-10033323	-	CE	0.99548	0.99486	0.00061059	0.52	K0	0
Cops5	5	chr1:10032339-10032424	-	CE	0.99682	0.99635	0.00047564	0.512	K0	0
Cops5	6	chr1:10030599-10030710	-	CE	0.99794	0.99762	0.00031939	0.544	K0	0
Cops5	7	chr1:10027103-10027251	-	CE	0.99787	0.99753	0.00033735	0.529	K0	0
Ephx1	2	chr1:181001799-181001986	-	CE	0.98572	0.9914	-0.0056791	0.676	K1	0.0949
Ephx1	3	chr1:180999723-180999903	-	CE	0.98823	0.99264	-0.0044082	0.698	K1	0.0949
Ephx1	4	chr1:180995949-180996176	-	CE	0.9867	0.99233	-0.0056245	0.677	K1	0.0949
Ephx1	5	chr1:180994628-180994757	-	CE	0.98615	0.98923	-0.0030728	0.57	K0	0
Ephx1	6	chr1:180994046-180994087	-	AA	0.95182	0.95938	-0.007566	0.563	K1	0.3539
Ephx1	7	chr1:180993879-180994045	-	CE	0.95584	0.97831	-0.022474	0.731	K1	0.3539
Ephx1	8	chr1:180991933-180992041	-	CE	0.95637	0.97764	-0.021272	0.749	K2	0.3783
Ephx1	9	chr1:180990393-180990518	-	CE	0.9901	0.98921	0.00088597	0.528	K0	0
Tuba4a	2	chr1:75217212-75217434	-	CE	0.99721	0.99819	-0.00097787	0.619	K0	0
Tuba4a	3	chr1:75216827-75216975	-	CE	0.99652	0.9978	-0.0012815	0.635	K0	0
Pyhin1	2	chr1:173637286-173637567	+	CE	0.99682	0.99695	-0.00012977	0.501	K0	0
Pyhin1	3	chr1:173638866-173639002	+	CE	0.99632	0.99606	0.00025719	0.521	K0	0
Pyhin1	4	chr1:173641005-173641244	+	CE	0.99485	0.99474	0.00011092	0.502	K0	0
Pyhin1	5	chr1:173642487-173642900	+	CE	0.99704	0.99721	-0.00016624	0.534	K0	0
Pyhin1	6	chr1:173644648-173644836	+	CE	0.99776	0.99779	-2.6441e-05	0.517	K0	0
Ufc1	3	chr1:171294828-171294920	-	RI	0.04448	0.16205	-0.11757	0.683	K1	0.9534
Ufc1	4	chr1:171294634-171294827	-	CE	0.99427	0.99357	0.00069472	0.501	K0	0
Ufc1	5	chr1:171290149-171290216	-	CE	0.99699	0.99654	0.00045017	0.515	K0	0
Ufc1	6	chr1:171289884-171289947	-	CE	0.99769	0.99783	-0.00014239	0.551	K0	0
Ufc1	7	chr1:171289518-171289594	-	CE	0.99804	0.99818	-0.00014709	0.554	K0	0
Ufc1	8	chr1:171289171-171289261	-	CE	0.98968	0.99741	-0.0077267	0.747	K1	0.1655
Ufc1	9	chr1:171288712-171288971	-	TE	0.0017049	0.0015159	0.000189	0.508	K1	0
Ufc1	10	chr1:171288563-171288711	-	TE	0.99836	0.99847	-0.00011789	0.505	K1	0
Pikfyve	1	chr1:65186702-65186749	+	TS	0.022994	0.023382	-0.00038769	0.508	K1	0
Pikfyve	2	chr1:65186750-65186833	+	TS	0.97644	0.97643	1.2999e-05	0.511	K1	0
Pikfyve	3	chr1:65190319-65190499	+	CE	0.98022	0.98254	-0.0023235	0.533	K0	0
Pikfyve	4	chr1:65192145-65192294	+	CE	0.98738	0.98499	0.002389	0.532	K0	0
Pikfyve	5	chr1:65192534-65192566	+	CE	0.095783	0.13735	-0.041572	0.649	K1	0.6081
Pikfyve	6	chr1:65195656-65195774	+	CE	0.99025	0.98704	0.0032178	0.537	K0	0
Pikfyve	7	chr1:65196612-65196783	+	CE	0.99047	0.98975	0.00071807	0.518	K0	0
Pikfyve	8	chr1:65202716-65202923	+	CE	0.98911	0.98982	-0.0007068	0.554	K0	0
Pikfyve	9	chr1:65205589-65205678	+	CE	0.98942	0.9903	-0.00088057	0.547	K0	0
Pikfyve	10	chr1:65215934-65216072	+	CE	0.99011	0.99028	-0.0001703	0.504	K0	0
Pikfyve	11	chr1:65219754-65219911	+	CE	0.99139	0.99069	0.00069196	0.51	K0	0
Pikfyve	12	chr1:65222270-65222381	+	CE	0.99135	0.99008	0.0012675	0.548	K0	0
Pikfyve	13	chr1:65223505-65223652	+	CE	0.99006	0.98975	0.00030597	0.538	K0	0
Pikfyve	14	chr1:65224162-65224329	+	CE	0.40144	0.47714	-0.075699	0.739	K1	0.9996
Pikfyve	15	chr1:65230794-65230853	+	CE	0.99076	0.99052	0.00024089	0.532	K0	0
Pikfyve	16	chr1:65233730-65233859	+	CE	0.9913	0.98907	0.0022261	0.548	K0	0
Pikfyve	17	chr1:65234254-65234434	+	CE	0.98626	0.98489	0.0013651	0.521	K0	0
Pikfyve	18	chr1:65235010-65235084	+	CE	0.98634	0.98561	0.00073508	0.506	K0	0
Pikfyve	19	chr1:65238435-65238542	+	CE	0.93219	0.95058	-0.018391	0.531	K1	0.6002
Pikfyve	20	chr1:65244396-65244536	+	CE	0.98949	0.98885	0.00064444	0.528	K0	0
Pikfyve	21	chr1:65245710-65245836	+	CE	0.98621	0.9861	0.0001096	0.509	K0	0
Pikfyve	22	chr1:65246062-65247218	+	CE	0.98294	0.98857	-0.0056254	0.597	K0	0
Pikfyve	23	chr1:65250186-65250286	+	CE	0.98474	0.98694	-0.0021963	0.53	K0	0
Pikfyve	24	chr1:65251605-65251676	+	CE	0.98913	0.98843	0.00070223	0.53	K0	0
Pikfyve	25	chr1:65252412-65252583	+	CE	0.98963	0.98891	0.00072209	0.508	K0	0
Pikfyve	26	chr1:65253352-65253530	+	CE	0.98696	0.98847	-0.0015106	0.554	K0	0
Pikfyve	27	chr1:65255042-65255155	+	CE	0.98601	0.98733	-0.0013268	0.552	K0	0
Pikfyve	28	chr1:65255522-65255630	+	CE	0.98976	0.98954	0.00022736	0.517	K0	0
Pikfyve	29	chr1:65255939-65256093	+	CE	0.98907	0.98919	-0.00011401	0.508	K0	0
Pikfyve	30	chr1:65256548-65256638	+	CE	0.98492	0.98728	-0.0023608	0.542	K0	0
Pikfyve	31	chr1:65257909-65257969	+	CE	0.98358	0.98413	-0.00054868	0.522	K0	0
Pikfyve	32	chr1:65258783-65258920	+	CE	0.97823	0.98092	-0.0026964	0.518	K0	0
Pikfyve	33	chr1:65259999-65260119	+	CE	0.98213	0.98101	0.0011194	0.506	K0	0
Pikfyve	34	chr1:65262880-65262975	+	CE	0.98211	0.9775	0.0046137	0.548	K0	0
Pikfyve	35	chr1:65264347-65264430	+	CE	0.98203	0.98022	0.0018142	0.538	K0	0
Pikfyve	36	chr1:65265249-65265346	+	CE	0.98519	0.98548	-0.00029435	0.528	K0	0
Pikfyve	37	chr1:65265762-65265926	+	CE	0.98927	0.98939	-0.00011344	0.503	K0	0
Pikfyve	38	chr1:65267826-65267885	+	CE	0.99206	0.98265	0.0094041	0.722	K1	0.1667
Pikfyve	39	chr1:65268698-65268874	+	CE	0.95514	0.98016	-0.02502	0.723	K1	0.3879
Pikfyve	40	chr1:65269873-65269976	+	CE	0.98464	0.9841	0.00053326	0.529	K0	0
Pikfyve	41	chr1:65271268-65271396	+	CE	0.99153	0.99137	0.00015633	0.517	K0	0
Pikfyve	42	chr1:65272447-65272708	+	CE	0.99274	0.99242	0.00032825	0.511	K0	0
Pikfyve	43	chr1:65273033-65273107	+	CE	0.99073	0.99119	-0.00045427	0.524	K0	0
Pikfyve	44	chr1:65273643-65274012	+	TE	0.49116	0.50706	-0.015895	0.699	K1	0.9998
Pikfyve	45	chr1:65274013-65278695	+	TE	0.50875	0.49288	0.015863	0.74	K1	0.9998
Eef1b2	1	chr1:63176825-63177129	+	TS	0.98679	0.98953	-0.0027412	0.731	K1	0.1129
Eef1b2	2	chr1:63177130-63177291	+	TS	0.013059	0.01041	0.0026492	0.714	K1	0.1129
Eef1b2	3	chr1:63177754-63177876	+	CE	0.99933	0.99833	0.001007	0.815	K1	0.018
Eef1b2	4	chr1:63178439-63178565	+	CE	0.99971	0.9997	9.5379e-06	0.513	K0	0
Eef1b2	5	chr1:63178832-63178898	+	CE	0.99968	0.99968	-2.1213e-06	0.542	K0	0
Eef1b2	6	chr1:63179248-63179373	+	CE	0.99937	0.99969	-0.00031699	0.703	K1	0.0073
Eef1b2	7	chr1:63179458-63179656	+	TE	0.9938	0.99341	0.00038102	0.568	K1	0.0646
Eef1b2	8	chr1:63179657-63180486	+	TE	0.0062085	0.0065907	-0.00038226	0.556	K1	0.0646
Pogk	1	chr1:166409829-166409863	-	TS	0.88693	0.85298	0.033944	0.629	K2	0.5895
Pogk	2	chr1:166409783-166409828	-	TS	0.1082	0.13853	-0.03033	0.605	K2	0.5895
Pogk	3	chr1:166409707-166409782	-	TS	0.069601	0.068299	0.0013011	0.532	K2	0.5895
Pogk	7	chr1:166408399-166408532	-	CE	0.96681	0.95721	0.009607	0.581	K0	0
Pogk	8	chr1:166403498-166403624	-	CE	0.96223	0.95089	0.011339	0.599	K0	0
Pogk	10	chr1:166401866-166401964	-	CE	0.94479	0.94017	0.0046242	0.513	K0	0
Pogk	11	chr1:166398690-166400165	-	CE	0.9598	0.95946	0.00034454	0.52	K0	0
Pogk	12	chr1:166396169-166398689	-	TE	0.00061909	0.00058269	3.64e-05	0.501	K2	0
Pogk	13	chr1:166393614-166396168	-	TE	0.00059078	0.00060147	-1.0693e-05	0.517	K2	0
Pogk	14	chr1:166392228-166393613	-	TE	0.99938	0.99941	-2.7757e-05	0.53	K2	0
Gm16152	4	chr1:38389565-38389680	+	CE	0.88593	0.89553	-0.0095995	0.531	K0	0
Ino80d	2	chr1:63114211-63114267	-	AF	0.94688	0.90449	0.042397	0.681	K1	0.4664
Ino80d	3	chr1:63105656-63105759	-	CE	0.93615	0.96963	-0.033478	0.612	K3	1.6578
Ino80d	4	chr1:63093640-63093730	-	CE	0.97484	0.9873	-0.01246	0.735	K3	1.6578
Ino80d	5	chr1:63093441-63093531	-	AA	0.64257	0.64776	-0.0051918	0.503	K2	1.1355
Ino80d	6	chr1:63093285-63093440	-	CE	0.98142	0.99152	-0.010101	0.7	K2	1.1355
Ino80d	7	chr1:63085668-63086398	-	CE	0.98485	0.9833	0.0015475	0.534	K1	0.1843
Ino80d	8	chr1:63078953-63079061	-	CE	0.9923	0.99218	0.00012485	0.506	K0	0
Ino80d	9	chr1:63074322-63074546	-	CE	0.9804	0.98813	-0.0077367	0.626	K1	0.1787
Ino80d	10	chr1:63068184-63068293	-	CE	0.98734	0.98458	0.0027648	0.582	K0	0
Ino80d	11	chr1:63065704-63065837	-	CE	0.98727	0.98636	0.0009159	0.535	K0	0
Ino80d	12	chr1:63062036-63062253	-	CE	0.98832	0.98804	0.00027412	0.501	K0	0
Ino80d	13	chr1:63061040-63061197	-	CE	0.9896	0.98824	0.0013596	0.552	K0	0
Per2	3	chr1:91449813-91449878	-	CE	0.91415	0.89763	0.016517	0.568	K0	0
Per2	4	chr1:91448708-91448862	-	CE	0.88612	0.90697	-0.020848	0.566	K0	0
Per2	13	chr1:91433396-91433521	-	CE	0.87167	0.88675	-0.015088	0.543	K0	0
Rab23	3	chr1:33721608-33721699	+	CE	0.91297	0.87516	0.037802	0.62	K0	0
Rab23	4	chr1:33723786-33724005	+	CE	0.92081	0.90698	0.013824	0.558	K0	0
Rab23	5	chr1:33724934-33725019	+	CE	0.91498	0.8599	0.055078	0.637	K0	0
Rab23	6	chr1:33734702-33734858	+	CE	0.91969	0.89357	0.026124	0.579	K0	0
Rab23	7	chr1:33736800-33736882	+	CE	0.78828	0.88353	-0.095246	0.61	K1	0.986
Rab23	8	chr1:33738288-33738380	+	CE	0.9275	0.91821	0.0092848	0.57	K0	0
Rab23	9	chr1:33739253-33742561	+	TE	0.79508	0.79015	0.0049346	0.508	K1	0.7247
Rab23	10	chr1:33742562-33742564	+	TE	0.20592	0.20938	-0.0034634	0.537	K1	0.7247
Sdhc	3	chr1:171145756-171145812	-	CE	0.98795	0.98504	0.0029056	0.508	K1	0.2364
Sdhc	4	chr1:171143558-171143659	-	CE	0.9974	0.99747	-7.0639e-05	0.514	K0	0
Sdhc	5	chr1:171138694-171138755	-	CE	0.99794	0.99782	0.00011946	0.507	K0	0
Sdhc	6	chr1:171135993-171136156	-	CE	0.99758	0.99723	0.00034954	0.544	K0	0
Sdhc	7	chr1:171129407-171129905	-	TE	0.78776	0.76928	0.018488	0.772	K1	0.8006
Sdhc	8	chr1:171127165-171129406	-	TE	0.21229	0.23098	-0.01869	0.762	K1	0.8006
Mgat5	2	chr1:127249790-127249839	+	CE	0.87396	0.84939	0.024574	0.628	K1	0.684
Mgat5	5	chr1:127320604-127320765	+	CE	0.99722	0.99557	0.001653	0.611	K0	0
Mgat5	6	chr1:127365148-127365224	+	CE	0.99731	0.9957	0.0016068	0.583	K0	0
Mgat5	7	chr1:127366403-127366492	+	CE	0.99686	0.99494	0.0019238	0.592	K0	0
Mgat5	8	chr1:127382921-127382992	+	CE	0.9969	0.99556	0.0013406	0.577	K0	0
Mgat5	9	chr1:127384768-127384929	+	CE	0.99754	0.99621	0.0013227	0.585	K0	0
Mgat5	10	chr1:127387343-127387512	+	CE	0.99775	0.9961	0.0016496	0.637	K0	0
Mgat5	11	chr1:127390744-127390878	+	CE	0.99728	0.99558	0.0017012	0.613	K0	0
Mgat5	12	chr1:127397507-127397640	+	CE	0.99605	0.97315	0.022897	0.931	K1	0.2118
Mgat5	13	chr1:127412127-127412260	+	CE	0.99692	0.99432	0.0025957	0.609	K0	0
Mgat5	14	chr1:127446242-127446391	+	CE	0.99644	0.99417	0.0022702	0.623	K0	0
Mgat5	15	chr1:127459836-127459982	+	CE	0.99569	0.99238	0.0033059	0.634	K0	0
Mgat5	16	chr1:127469192-127469308	+	CE	0.99593	0.99229	0.0036417	0.669	K0	0
Mgat5	17	chr1:127471501-127471575	+	CE	0.99438	0.98984	0.0045408	0.634	K0	0
Mgat5	18	chr1:127479465-127479622	+	CE	0.99476	0.99019	0.0045682	0.617	K0	0
Mgat5	19	chr1:127482527-127483704	+	TE	0.00019162	0.00029083	-9.9209e-05	0.596	K1	0
Mgat5	20	chr1:127483705-127488336	+	TE	0.99982	0.9997	0.0001168	0.627	K1	0
Dis3l2	1	chr1:86703819-86703842	+	TS	0.057794	0.060809	-0.0030147	0.532	K1	0
Dis3l2	2	chr1:86703843-86703871	+	TS	0.94284	0.9378	0.0050373	0.536	K1	0
Dis3l2	3	chr1:86744681-86744828	+	CE	0.99304	0.99064	0.0024039	0.584	K0	0
Dis3l2	4	chr1:86745341-86745498	+	CE	0.98661	0.98692	-0.00030503	0.502	K1	0.1256
Dis3l2	5	chr1:86754227-86754280	+	CE	0.99419	0.99402	0.00017287	0.501	K0	0
Dis3l2	6	chr1:86760288-86760389	+	CE	0.99367	0.99225	0.0014176	0.559	K0	0
Dis3l2	7	chr1:86791416-86791457	+	CE	0.25161	0.19241	0.059205	0.703	K2	0.9045
Dis3l2	8	chr1:86821222-86821450	+	CE	0.99143	0.9828	0.0086237	0.644	K2	0.7594
Dis3l2	9	chr1:86854360-86854460	+	CE	0.9928	0.99232	0.00048297	0.505	K0	0
Dis3l2	10	chr1:86857127-86857374	+	CE	0.99196	0.99238	-0.00041757	0.519	K0	0
Dis3l2	11	chr1:86878403-86878576	+	CE	0.99032	0.99089	-0.0005741	0.554	K0	0
Dis3l2	12	chr1:86930754-86930833	+	CE	0.98635	0.98794	-0.0015877	0.508	K0	0
Dis3l2	13	chr1:86959743-86959855	+	CE	0.9871	0.98597	0.0011311	0.558	K0	0
Dis3l2	14	chr1:86973400-86973507	+	CE	0.93538	0.92897	0.0064125	0.582	K2	0.6926
Dis3l2	15	chr1:86990092-86990325	+	CE	0.97715	0.98254	-0.0053873	0.648	K2	0.6926
Dis3l2	16	chr1:87021038-87021117	+	CE	0.98009	0.97763	0.0024604	0.54	K0	0
Dis3l2	17	chr1:87044017-87044200	+	CE	0.97842	0.98191	-0.0034858	0.555	K0	0
Dis3l2	18	chr1:87044830-87044916	+	CE	0.97783	0.9801	-0.0022745	0.533	K0	0
Dis3l2	19	chr1:87047037-87047184	+	CE	0.9748	0.97919	-0.0043958	0.556	K0	0
Dis3l2	20	chr1:87047448-87047578	+	CE	0.98063	0.97815	0.0024782	0.518	K0	0
Dis3l2	21	chr1:87047688-87047792	+	CE	0.98336	0.98157	0.0017901	0.503	K0	0
Dis3l2	22	chr1:87048833-87048934	+	CE	0.98548	0.9837	0.0017806	0.522	K0	0
Dis3l2	23	chr1:87049623-87050092	+	TE	0.041294	0.057382	-0.016088	0.584	K1	0.5835
Dis3l2	24	chr1:87050093-87050095	+	TE	0.95818	0.94294	0.015237	0.574	K1	0.5835
Cspp1	1	chr1:10038217-10038261	+	TS	0.035631	0.0092686	0.026362	0.75	K1	0.4003
Cspp1	2	chr1:10038262-10038344	+	TS	0.96435	0.99096	-0.026611	0.756	K1	0.4003
Cspp1	3	chr1:10039773-10039784	+	TS	0.59253	0.74692	-0.15438	0.635	K1	0.8962
Cspp1	4	chr1:10039785-10039879	+	TS	0.40937	0.25567	0.15371	0.637	K1	0.8962
Cspp1	5	chr1:10039880-10039887	+	AD	0.074743	0.051624	0.023119	0.754	K2	1.2494
Cspp1	6	chr1:10045076-10045184	+	CE	0.99419	0.99411	8.9089e-05	0.503	K0	0
Cspp1	7	chr1:10046493-10046555	+	AF	0.012358	0.016828	-0.0044699	0.582	K1	0.0808
Cspp1	8	chr1:10047424-10047526	+	CE	0.97381	0.99435	-0.020543	0.901	K1	0.219
Cspp1	9	chr1:10058720-10058823	+	CE	0.99456	0.99332	0.0012422	0.504	K0	0
Cspp1	10	chr1:10059824-10059847	+	CE	0.059909	0.062932	-0.0030234	0.518	K3	0.5533
Cspp1	11	chr1:10064333-10064413	+	CE	0.98045	0.9901	-0.0096477	0.659	K3	0.5533
Cspp1	12	chr1:10065323-10065421	+	CE	0.96827	0.97166	-0.0033885	0.543	K3	0.5533
Cspp1	13	chr1:10066426-10066820	+	CE	0.99126	0.99153	-0.00027135	0.509	K0	0
Cspp1	14	chr1:10066821-10067102	+	TE	0.0024926	0.0024266	6.6011e-05	0.528	K2	0.9939
Cspp1	15	chr1:10067103-10067118	+	TE	0.62339	0.56507	0.058321	0.689	K2	0.9939
Cspp1	16	chr1:10067119-10067976	+	TE	0.0026397	0.0024421	0.00019758	0.519	K2	0.9939
Cspp1	17	chr1:10067977-10068333	+	TE	0.37647	0.43481	-0.058336	0.696	K2	0.9939
Cspp1	18	chr1:10074860-10074946	+	CE	0.94749	0.95749	-0.0099955	0.637	K2	0.5339
Cspp1	19	chr1:10077172-10077242	+	CE	0.99138	0.98202	0.0093536	0.654	K2	0.5339
Cspp1	20	chr1:10082253-10082346	+	CE	0.99322	0.99194	0.0012732	0.535	K0	0
Cspp1	21	chr1:10083501-10083558	+	CE	0.99209	0.99064	0.001456	0.506	K0	0
Cspp1	22	chr1:10085747-10085952	+	CE	0.85967	0.78678	0.072892	0.779	K1	0.8757
Cspp1	23	chr1:10088051-10088184	+	CE	0.9887	0.98754	0.0011587	0.516	K0	0
Cspp1	24	chr1:10088882-10088960	+	CE	0.99115	0.98966	0.0014968	0.507	K0	0
Cspp1	25	chr1:10090188-10090317	+	CE	0.99135	0.99002	0.001332	0.511	K0	0
Cspp1	26	chr1:10095866-10096013	+	CE	0.99134	0.98839	0.0029503	0.513	K0	0
Cspp1	27	chr1:10104212-10104364	+	CE	0.93615	0.88908	0.047065	0.8	K2	0.6562
Cspp1	28	chr1:10108369-10108481	+	CE	0.99065	0.98014	0.010513	0.704	K2	0.6562
Cspp1	29	chr1:10112393-10112542	+	CE	0.98579	0.97021	0.015578	0.634	K2	0.6151
Cspp1	30	chr1:10112876-10113022	+	CE	0.98708	0.97113	0.015953	0.666	K2	0.6151
Cspp1	31	chr1:10113603-10113707	+	CE	0.97949	0.9629	0.016587	0.691	K2	0.6151
Cspp1	32	chr1:10116018-10116084	+	CE	0.96406	0.92252	0.041533	0.753	K2	0.6151
Cspp1	33	chr1:10116614-10116731	+	CE	0.98089	0.92327	0.057614	0.879	K2	0.6151
Cspp1	34	chr1:10126340-10126479	+	CE	0.98791	0.98654	0.001374	0.516	K0	0
Cspp1	35	chr1:10127423-10127563	+	CE	0.98952	0.98782	0.0016992	0.531	K0	0
Cspp1	36	chr1:10129986-10130032	+	CE	0.98408	0.98188	0.0022038	0.528	K0	0
Cspp1	37	chr1:10132454-10132517	+	CE	0.97999	0.97799	0.001998	0.512	K0	0
Cspp1	38	chr1:10133164-10133273	+	CE	0.96598	0.92807	0.037911	0.67	K1	0.6163
Cspp1	39	chr1:10134092-10134230	+	CE	0.98954	0.9899	-0.00036537	0.524	K0	0
Cspp1	40	chr1:10135934-10136145	+	TE	0.022302	0.0024789	0.019824	0.79	K1	0.3302
Cspp1	41	chr1:10136146-10136768	+	TE	0.97769	0.99748	-0.019793	0.804	K1	0.3302
Kif14	1	chr1:136467935-136467957	+	TS	0.18638	0.25307	-0.066691	0.583	K1	0.9846
Kif14	2	chr1:136467958-136468769	+	TS	0.81385	0.74609	0.06776	0.605	K1	0.9846
Kif14	3	chr1:136468770-136468919	+	RI	0.9676	0.95561	0.011992	0.694	K1	0.285
Kif14	4	chr1:136468920-136469174	+	CE	0.99191	0.98724	0.0046642	0.604	K0	0
Kif14	5	chr1:136471320-136471574	+	CE	0.99039	0.98294	0.0074475	0.641	K0	0
Kif14	6	chr1:136473385-136473472	+	CE	0.98932	0.98492	0.0044009	0.603	K0	0
Kif14	7	chr1:136476340-136476438	+	CE	0.99168	0.98639	0.0052845	0.632	K0	0
Kif14	8	chr1:136478359-136478411	+	CE	0.98991	0.98129	0.0086147	0.646	K0	0
Kif14	9	chr1:136479144-136479174	+	CE	0.9804	0.97662	0.0037836	0.557	K0	0
Kif14	10	chr1:136479808-136479915	+	CE	0.98814	0.98371	0.0044264	0.568	K0	0
Kif14	11	chr1:136482388-136482504	+	CE	0.99042	0.98492	0.0055016	0.601	K0	0
Kif14	12	chr1:136482924-136483039	+	CE	0.98957	0.98375	0.0058225	0.602	K0	0
Kif14	13	chr1:136486272-136486444	+	CE	0.99314	0.99163	0.0015106	0.581	K0	0
Kif14	14	chr1:136487035-136487182	+	CE	0.99385	0.99214	0.0017056	0.543	K0	0
Kif14	15	chr1:136487404-136487467	+	CE	0.9941	0.99069	0.00341	0.638	K0	0
Kif14	16	chr1:136490200-136490384	+	CE	0.99385	0.99074	0.0031096	0.615	K0	0
Kif14	17	chr1:136494628-136494730	+	CE	0.99248	0.99022	0.0022583	0.574	K0	0
Kif14	18	chr1:136495856-136496019	+	CE	0.99348	0.99197	0.001511	0.56	K0	0
Kif14	19	chr1:136496570-136496717	+	CE	0.99223	0.99059	0.0016423	0.572	K0	0
Kif14	20	chr1:136497363-136497515	+	CE	0.99083	0.98656	0.0042682	0.601	K0	0
Kif14	21	chr1:136500017-136500143	+	CE	0.99124	0.98629	0.0049528	0.624	K0	0
Kif14	22	chr1:136502647-136502740	+	CE	0.98442	0.98082	0.0036043	0.593	K1	0.1547
Kif14	23	chr1:136503310-136503439	+	CE	0.98493	0.98431	0.00061857	0.533	K1	0.1547
Kif14	24	chr1:136510145-136510245	+	CE	0.98444	0.98419	0.00024952	0.501	K1	0.1547
Kif14	25	chr1:136513734-136513822	+	CE	0.98453	0.98116	0.0033729	0.57	K1	0.1547
Kif14	26	chr1:136515854-136516078	+	CE	0.99107	0.98482	0.00625	0.636	K0	0
Kif14	27	chr1:136516260-136516441	+	CE	0.98998	0.98144	0.008539	0.641	K0	0
Kif14	28	chr1:136519629-136519784	+	CE	0.98889	0.98339	0.0054969	0.598	K0	0
Kif14	29	chr1:136521190-136521309	+	CE	0.98654	0.983	0.0035355	0.576	K0	0
Kif14	30	chr1:136525782-136525856	+	CE	0.9861	0.98143	0.0046698	0.544	K0	0
Kif14	31	chr1:136526775-136526907	+	CE	0.98483	0.98046	0.0043692	0.569	K0	0
Mrpl30	1	chr1:37890477-37890531	+	TS	0.024802	0.03215	-0.007348	0.512	K1	0
Mrpl30	2	chr1:37890532-37890584	+	TS	0.97524	0.96617	0.0090645	0.504	K1	0
Mrpl30	3	chr1:37892943-37893023	+	CE	0.66689	0.70326	-0.036366	0.791	K1	0.9268
Mrpl30	5	chr1:37893939-37894015	+	CE	0.99742	0.99752	-0.00010306	0.542	K0	0
Mrpl30	6	chr1:37895330-37895410	+	CE	0.99616	0.98965	0.0065086	0.865	K1	0.0907
Mrpl30	7	chr1:37897688-37897834	+	CE	0.99782	0.99781	1.363e-05	0.501	K0	0
Mrpl30	8	chr1:37898061-37898338	+	TE	0.93693	0.92099	0.015938	0.66	K2	0.5431
Mrpl30	9	chr1:37898339-37898364	+	TE	0.052892	0.053567	-0.00067515	0.552	K2	0.5431
Mrpl30	10	chr1:37898365-37898535	+	TE	0.012165	0.027353	-0.015188	0.85	K2	0.5431
Gm28177	7	chr1:52100324-52100459	+	CE	0.87292	0.88025	-0.0073303	0.521	K0	0
Gm28177	8	chr1:52101852-52101901	+	CE	0.88977	0.88586	0.0039179	0.506	K0	0
Gm28177	9	chr1:52102117-52102211	+	CE	0.89415	0.89882	-0.0046712	0.518	K0	0
Gm28177	10	chr1:52102481-52102617	+	CE	0.88289	0.77396	0.10893	0.715	K1	0.832
Gm28177	14	chr1:52119912-52120035	+	CE	0.95327	0.89776	0.055507	0.704	K2	0.6555
Gm28177	15	chr1:52122591-52122721	+	CE	0.96393	0.90583	0.0581	0.751	K2	0.6555
Gm28177	16	chr1:52123114-52123258	+	CE	0.92482	0.87192	0.052904	0.69	K2	0.6555
Gm28177	17	chr1:52126520-52126618	+	CE	0.92351	0.8723	0.051211	0.688	K2	0.6555
Gm28177	18	chr1:52132544-52132633	+	CE	0.93706	0.87712	0.059934	0.679	K2	0.6555
Gm28177	19	chr1:52135603-52135681	+	CE	0.92123	0.86203	0.059198	0.714	K2	0.6555
Gm28177	20	chr1:52136879-52136970	+	CE	0.89393	0.84922	0.044713	0.622	K2	0.6555
Gm28177	21	chr1:52137279-52137430	+	CE	0.86912	0.78799	0.081128	0.703	K2	0.6555
Gm28177	27	chr1:52147901-52147999	+	CE	0.8564	0.71191	0.1445	0.793	K1	0.7806
Gm28177	28	chr1:52148903-52149038	+	CE	0.91762	0.81078	0.10684	0.766	K1	0.7806
Gm28177	29	chr1:52150619-52150668	+	CE	0.86401	0.7045	0.1595	0.818	K1	0.7806
Gm28177	31	chr1:52152233-52152378	+	CE	0.88844	0.88195	0.0064978	0.509	K0	0
Gm28177	32	chr1:52153844-52154029	+	CE	0.89988	0.89818	0.0016993	0.509	K0	0
Gm28177	33	chr1:52154986-52155061	+	CE	0.91071	0.90226	0.0084545	0.511	K0	0
Kmo	1	chr1:175631996-175632179	+	TS	0.35525	0.48416	-0.12891	0.669	K1	0.9999
Kmo	2	chr1:175632180-175632273	+	TS	0.64721	0.51121	0.136	0.665	K1	0.9999
Kmo	3	chr1:175637509-175637578	+	CE	0.95591	0.9323	0.023609	0.591	K0	0
Kmo	4	chr1:175637887-175637984	+	CE	0.95801	0.94762	0.010383	0.53	K0	0
Kmo	5	chr1:175639100-175639189	+	CE	0.95092	0.94577	0.0051477	0.514	K0	0
Kmo	6	chr1:175643558-175643606	+	CE	0.9505	0.9424	0.0080995	0.543	K0	0
Kmo	7	chr1:175647113-175647200	+	CE	0.87228	0.88437	-0.012095	0.533	K1	0.8106
Kmo	8	chr1:175649152-175649317	+	CE	0.94429	0.94489	-0.00060213	0.524	K0	0
Kmo	9	chr1:175650565-175650636	+	CE	0.92787	0.96208	-0.034206	0.638	K0	0
Kmo	10	chr1:175651587-175651708	+	CE	0.94191	0.96289	-0.020983	0.635	K0	0
Kmo	11	chr1:175653527-175653674	+	CE	0.94327	0.95718	-0.013908	0.592	K0	0
Kmo	12	chr1:175655069-175655126	+	CE	0.94993	0.93736	0.01257	0.55	K0	0
Kmo	13	chr1:175656721-175656803	+	CE	0.95561	0.93016	0.02545	0.589	K0	0
Kmo	14	chr1:175658321-175658422	+	CE	0.94935	0.95114	-0.0017879	0.53	K0	0
Kmo	15	chr1:175658513-175658572	+	CE	0.92514	0.94989	-0.02475	0.583	K0	0
Kmo	16	chr1:175659643-175660853	+	TE	0.93486	0.91142	0.023441	0.63	K1	0.6247
Kmo	17	chr1:175660854-175662116	+	TE	0.065134	0.088559	-0.023425	0.612	K1	0.6247
Fbxo36	2	chr1:84881092-84881200	+	CE	0.94664	0.91261	0.03403	0.606	K0	0
Fbxo36	3	chr1:84896490-84896662	+	CE	0.94128	0.90189	0.039394	0.603	K0	0
Apoa2	9	chr1:171225666-171225798	+	CE	0.88204	0.87484	0.0071958	0.505	K0	0
Nhej1	2	chr1:75045309-75045367	-	CE	0.97029	0.9801	-0.0098121	0.573	K0	0
Nhej1	3	chr1:74968795-74968912	-	CE	0.95806	0.96897	-0.010913	0.567	K0	0
Nhej1	4	chr1:74968169-74968275	-	CE	0.89796	0.91063	-0.012666	0.594	K1	0.7326
Smarcal1	2	chr1:72583615-72583737	+	AF	0.016543	0.021009	-0.004466	0.544	K0	0
Smarcal1	3	chr1:72585638-72586404	+	CE	0.99088	0.99016	0.00072304	0.506	K0	0
Smarcal1	4	chr1:72587051-72587101	+	CE	0.99064	0.99031	0.00033838	0.511	K0	0
Smarcal1	5	chr1:72591063-72591275	+	CE	0.99301	0.99142	0.001598	0.556	K0	0
Smarcal1	6	chr1:72591825-72591875	+	CE	0.99282	0.99174	0.0010829	0.52	K0	0
Smarcal1	7	chr1:72595788-72595974	+	CE	0.98945	0.99004	-0.00058781	0.513	K0	0
Smarcal1	8	chr1:72597379-72597529	+	CE	0.98982	0.98948	0.00033261	0.526	K0	0
Smarcal1	9	chr1:72598771-72598929	+	CE	0.98846	0.98814	0.00031948	0.519	K0	0
Smarcal1	10	chr1:72601369-72601434	+	CE	0.98683	0.98533	0.0015015	0.524	K0	0
Smarcal1	11	chr1:72611295-72611435	+	CE	0.98866	0.98734	0.0013149	0.542	K0	0
Smarcal1	12	chr1:72612809-72613024	+	CE	0.99046	0.9887	0.0017668	0.552	K0	0
Smarcal1	13	chr1:72616508-72616578	+	CE	0.98975	0.98535	0.0043997	0.592	K0	0
Smarcal1	14	chr1:72620032-72620134	+	CE	0.9901	0.98465	0.0054489	0.619	K0	0
Smarcal1	15	chr1:72626463-72626645	+	CE	0.99233	0.99071	0.0016173	0.536	K0	0
Smarcal1	16	chr1:72628101-72628201	+	CE	0.99226	0.98998	0.002282	0.529	K0	0
Smarcal1	17	chr1:72629375-72629471	+	CE	0.99017	0.98752	0.0026467	0.567	K0	0
Rgs18	3	chr1:144773521-144773582	-	CE	0.96073	0.84216	0.11857	0.86	K1	0.652
Rgs18	4	chr1:144755923-144756089	-	CE	0.93031	0.91847	0.011838	0.58	K0	0
Myeov2	2	chr1:92640244-92640564	-	AF	0.0033916	0.0038833	-0.00049171	0.549	K0	0
Myeov2	3	chr1:92639687-92639759	-	CE	0.96009	0.95137	0.0087168	0.696	K1	0.3125
Myo1b	34	chr1:51749994-51751296	-	TE	0.5172	0.76057	-0.24337	0.604	K2	0.9677
Myo1b	35	chr1:51749989-51749993	-	TE	0.48513	0.071018	0.41411	0.716	K2	0.9677
Myo1b	36	chr1:51749982-51749988	-	TE	0.095186	0.071616	0.02357	0.589	K2	0.9677
Myo1b	37	chr1:51749765-51749981	-	TE	0.094124	0.23973	-0.14561	0.766	K2	0.9677
Creg1	2	chr1:165769476-165769520	+	AF	0.022119	0.022907	-0.00078848	0.5	K0	0
Creg1	3	chr1:165769813-165769932	+	CE	0.99075	0.99058	0.00017278	0.508	K0	0
Creg1	4	chr1:165770632-165770816	+	CE	0.99277	0.99236	0.00041329	0.532	K0	0
Creg1	5	chr1:165773844-165773918	+	TE	0.98033	0.97747	0.002859	0.576	K1	0.1527
Creg1	6	chr1:165773919-165775308	+	TE	0.019771	0.022286	-0.0025146	0.576	K1	0.1527
Eya1	23	chr1:14170643-14170996	-	TE	0.079877	0.69674	-0.61687	1	K2	1.0902
Eya1	24	chr1:14169666-14170642	-	TE	0.73468	0.17866	0.55602	0.996	K2	1.0902
Eya1	25	chr1:14168958-14169665	-	TE	0.24477	0.19397	0.050796	0.644	K2	1.0902
Eya1	26	chr1:14168954-14168957	-	TE	0.08489	0.089362	-0.0044715	0.512	K2	1.0902
Rgs8	12	chr1:153692725-153692946	+	TE	0.12904	0.044321	0.084722	0.771	K3	0.9957
Rgs8	13	chr1:153692947-153692985	+	TE	0.12799	0.04524	0.082752	0.762	K3	0.9957
Rgs8	14	chr1:153692986-153695578	+	TE	0.52693	0.041772	0.48516	0.998	K3	0.9957
Rgs8	15	chr1:153695579-153697667	+	TE	0.47014	0.95638	-0.48624	0.998	K3	0.9957
Rgs8	16	chr1:153697668-153700323	+	TE	0.12825	0.042026	0.086226	0.762	K3	0.9957
Dedd	1	chr1:171329145-171329398	+	TS	0.073864	0.095714	-0.02185	0.576	K2	0.9941
Dedd	2	chr1:171329399-171329407	+	TS	0.3062	0.64591	-0.33971	0.855	K2	0.9941
Dedd	3	chr1:171329408-171329526	+	TS	0.69438	0.35821	0.33617	0.874	K2	0.9941
Dedd	7	chr1:171338252-171338640	+	CE	0.98201	0.97359	0.0084262	0.56	K0	0
Dedd	8	chr1:171338823-171338930	+	CE	0.99055	0.96207	0.028475	0.808	K1	0.3463
Dedd	9	chr1:171340193-171340339	+	CE	0.98224	0.98493	-0.0026903	0.545	K0	0
Dedd	10	chr1:171340828-171341616	+	TE	0.0086242	0.0066709	0.0019533	0.594	K2	0.3112
Dedd	11	chr1:171341617-171341682	+	TE	0.026564	0.0067913	0.019773	0.761	K2	0.3112
Dedd	12	chr1:171341683-171342325	+	TE	0.66261	0.33556	0.32705	0.714	K2	0.3112
Dedd	13	chr1:171342326-171342331	+	TE	0.31942	0.66449	-0.34506	0.674	K2	0.3112
Tyw5	2	chr1:57401369-57401523	-	CE	0.96625	0.9643	0.0019501	0.528	K0	0
Tyw5	3	chr1:57396727-57396796	-	CE	0.95775	0.96384	-0.0060937	0.575	K0	0
Tyw5	4	chr1:57394047-57394091	-	CE	0.97583	0.98084	-0.005002	0.595	K0	0
Tyw5	5	chr1:57393350-57393487	-	CE	0.98815	0.98752	0.00063724	0.51	K0	0
Tyw5	6	chr1:57391449-57391536	-	CE	0.9861	0.98533	0.00076855	0.502	K0	0
Tyw5	7	chr1:57390642-57390758	-	CE	0.97763	0.97512	0.0025148	0.51	K0	0
Il18r1	3	chr1:40465782-40465810	+	AD	0.32815	0.81665	-0.4885	1	K3	2.3187
Il18r1	4	chr1:40465970-40466005	+	TS	0.79344	0.92535	-0.13192	0.805	K1	0.9312
Il18r1	5	chr1:40466006-40466160	+	TS	0.20705	0.077812	0.12924	0.792	K1	0.9312
Il18r1	6	chr1:40466161-40466269	+	CE	0.91439	0.78941	0.12498	0.787	K3	2.7215
Il18r1	7	chr1:40466270-40466357	+	AD	0.49257	0.4429	0.049667	0.607	K3	2.7215
Il18r1	8	chr1:40471729-40471814	+	CE	0.99214	0.9512	0.040947	0.826	K0	0
Il18r1	9	chr1:40474694-40474940	+	CE	0.99299	0.96037	0.032621	0.851	K0	0
Il18r1	10	chr1:40478385-40478550	+	CE	0.99242	0.95365	0.038767	0.84	K0	0
Il18r1	11	chr1:40480922-40481066	+	CE	0.99329	0.9644	0.028888	0.82	K0	0
Il18r1	12	chr1:40484281-40484343	+	CE	0.98991	0.96982	0.020085	0.724	K1	0.079
Il18r1	13	chr1:40486975-40487098	+	CE	0.99406	0.96354	0.03052	0.843	K0	0
Il18r1	14	chr1:40489601-40489740	+	CE	0.99313	0.95187	0.041256	0.868	K0	0
Il18r1	15	chr1:40491058-40491216	+	CE	0.98561	0.95628	0.029332	0.775	K2	1.1295
Il18r1	16	chr1:40491217-40491578	+	TE	0.34063	0.91919	-0.57856	0.708	K1	0.0004
Il18r1	17	chr1:40491579-40491580	+	TE	0.65918	0.08148	0.5777	0.69	K1	0.0004
Il18r1	18	chr1:40495749-40495907	+	CE	0.98591	0.9374	0.04851	0.825	K0	0
Il18r1	19	chr1:40498338-40499138	+	CE	0.98316	0.91697	0.066186	0.815	K0	0
Il18r1	20	chr1:40499139-40499165	+	AD	0.97694	0.91606	0.060877	0.802	K0	0
Il18r1	21	chr1:40499166-40500445	+	RI	0.97032	0.91853	0.051794	0.768	K0	0
Il18r1	22	chr1:40500446-40500476	+	AA	0.97843	0.88839	0.090041	0.842	K0	0
Il18r1	23	chr1:40500477-40500833	+	TE	0.0073168	0.33727	-0.32995	0.54	K2	0.0601
Il18r1	24	chr1:40500834-40500853	+	TE	0.98566	0.65904	0.32662	0.541	K2	0.0601
Il18r1	25	chr1:40500854-40500854	+	TE	0.014176	0.047961	-0.033786	0.79	K2	0.0601
Rfwd2	2	chr1:159239562-159239621	+	CE	0.99546	0.99575	-0.00028201	0.519	K0	0
Rfwd2	3	chr1:159244589-159244686	+	CE	0.95971	0.95812	0.0015872	0.612	K1	0.3839
Rfwd2	4	chr1:159249202-159249278	+	CE	0.99667	0.99685	-0.00018208	0.513	K0	0
Rfwd2	5	chr1:159250023-159250142	+	CE	0.9976	0.99774	-0.00014222	0.506	K0	0
Rfwd2	6	chr1:159252548-159252616	+	CE	0.99791	0.99776	0.00015025	0.501	K0	0
Rfwd2	7	chr1:159266757-159266816	+	CE	0.99262	0.99692	-0.0043015	0.674	K1	0.1049
Rfwd2	8	chr1:159268109-159268185	+	CE	0.99704	0.99693	0.000109	0.51	K0	0
Rfwd2	9	chr1:159278089-159278146	+	CE	0.99678	0.99655	0.00022647	0.505	K0	0
Rfwd2	10	chr1:159284548-159284662	+	CE	0.99313	0.98594	0.0071957	0.613	K1	0.217
Rfwd2	11	chr1:159288905-159289040	+	CE	0.99805	0.99805	-6.224e-06	0.51	K0	0
Rfwd2	12	chr1:159306573-159306716	+	CE	0.99825	0.99816	9.1358e-05	0.503	K0	0
Rfwd2	13	chr1:159308410-159308518	+	CE	0.99803	0.99803	3.2992e-06	0.518	K0	0
Rfwd2	14	chr1:159308883-159308964	+	CE	0.99772	0.99771	7.68e-06	0.502	K0	0
Rfwd2	15	chr1:159319724-159319840	+	CE	0.99731	0.99751	-0.00019536	0.54	K0	0
Rfwd2	16	chr1:159324917-159325034	+	CE	0.99706	0.99719	-0.00012765	0.511	K0	0
Rfwd2	17	chr1:159327077-159327201	+	CE	0.99739	0.99743	-3.1876e-05	0.507	K0	0
Rfwd2	18	chr1:159328602-159328762	+	CE	0.99722	0.99698	0.00024203	0.526	K0	0
Rfwd2	19	chr1:159342807-159342851	+	CE	0.99603	0.99582	0.00020542	0.526	K0	0
Psen2	6	chr1:180245614-180245757	-	CE	0.96701	0.96026	0.0067501	0.546	K0	0
Psen2	7	chr1:180240731-180240945	-	CE	0.97542	0.97231	0.0031109	0.507	K0	0
Psen2	8	chr1:180238873-180239014	-	CE	0.97291	0.97265	0.000258	0.538	K0	0
Psen2	9	chr1:180235911-180235978	-	CE	0.97602	0.97822	-0.0022001	0.52	K0	0
Psen2	10	chr1:180234989-180235209	-	CE	0.97154	0.97409	-0.0025422	0.524	K0	0
Psen2	11	chr1:180233611-180233709	-	CE	0.96094	0.95269	0.0082488	0.55	K0	0
Psen2	12	chr1:180229842-180229925	-	CE	0.95393	0.92414	0.029795	0.644	K0	0
Psen2	13	chr1:180229485-180229487	-	AA	0.89266	0.8742	0.018457	0.527	K1	0.7417
Psen2	14	chr1:180229386-180229484	-	CE	0.94838	0.93514	0.013235	0.581	K0	0
Psen2	15	chr1:180228843-180228961	-	CE	0.96032	0.95312	0.0072074	0.534	K0	0
Psen2	16	chr1:180227445-180227728	-	TE	0.056564	0.066772	-0.010209	0.533	K2	0.725
Psen2	17	chr1:180227443-180227444	-	TE	0.0087774	0.011946	-0.0031684	0.568	K2	0.725
Psen2	18	chr1:180227006-180227442	-	TE	0.93502	0.60286	0.33215	0.622	K2	0.725
Psen2	19	chr1:180227004-180227005	-	TE	0.017585	0.3416	-0.32402	0.594	K2	0.725
Hibch	1	chr1:52845013-52845045	+	TS	0.94348	0.94318	0.00029948	0.535	K1	0.1558
Hibch	2	chr1:52845046-52845144	+	TS	0.057238	0.055574	0.0016646	0.563	K1	0.1558
Hibch	3	chr1:52853668-52853710	+	CE	0.97411	0.97639	-0.0022743	0.505	K0	0
Hibch	4	chr1:52860028-52860165	+	CE	0.94901	0.9447	0.0043116	0.511	K1	0.4734
Hibch	5	chr1:52862268-52862352	+	CE	0.9903	0.98975	0.0005422	0.527	K0	0
Hibch	6	chr1:52865549-52865629	+	CE	0.98091	0.99044	-0.0095371	0.718	K1	0.196
Hibch	7	chr1:52868906-52868958	+	CE	0.98904	0.98795	0.0010938	0.543	K0	0
Hibch	8	chr1:52885103-52885181	+	CE	0.98697	0.98549	0.0014709	0.532	K0	0
Hibch	9	chr1:52901188-52901333	+	CE	0.98955	0.98887	0.00068112	0.549	K0	0
Hibch	10	chr1:52902847-52902933	+	CE	0.98907	0.98893	0.0001385	0.526	K0	0
Hibch	11	chr1:52904642-52904700	+	CE	0.99134	0.9911	0.00023942	0.511	K0	0
Hibch	12	chr1:52905371-52905452	+	CE	0.99277	0.99041	0.0023629	0.554	K0	0
Hibch	13	chr1:52913731-52913850	+	CE	0.98855	0.98177	0.006788	0.596	K0	0
Hibch	14	chr1:52916637-52916670	+	CE	0.9822	0.97981	0.0023875	0.524	K0	0
Hibch	15	chr1:52920263-52920981	+	TE	0.99566	0.99551	0.00015044	0.509	K1	0.0002
Hibch	16	chr1:52920982-52920986	+	TE	0.0042592	0.0044348	-0.00017569	0.509	K1	0.0002
9430016H08Rik	2	chr1:57409912-57409983	+	CE	0.98595	0.98958	-0.0036234	0.541	K0	0
9430016H08Rik	3	chr1:57411723-57411849	+	CE	0.99132	0.99321	-0.001885	0.527	K0	0
9430016H08Rik	4	chr1:57413240-57413387	+	CE	0.99225	0.99282	-0.00057522	0.54	K0	0
Mfsd6	2	chr1:52708164-52709755	-	CE	0.95037	0.95267	-0.0023062	0.522	K0	0
Mfsd6	3	chr1:52676478-52676575	-	CE	0.95683	0.95927	-0.0024413	0.532	K0	0
Mfsd6	4	chr1:52663285-52663446	-	CE	0.96092	0.96309	-0.0021726	0.515	K0	0
Mfsd6	5	chr1:52662390-52662488	-	CE	0.97381	0.96917	0.004643	0.549	K0	0
Mfsd6	6	chr1:52660807-52661087	-	CE	0.97798	0.96806	0.0099142	0.604	K0	0
Pfkfb2	7	chr1:130708076-130708201	-	CE	0.96476	0.96583	-0.0010647	0.505	K0	0
Pfkfb2	8	chr1:130707509-130707605	-	CE	0.85963	0.96754	-0.10792	0.952	K1	0.5969
Pfkfb2	9	chr1:130707052-130707118	-	CE	0.97434	0.97562	-0.0012798	0.516	K0	0
Pfkfb2	10	chr1:130706843-130706917	-	CE	0.97846	0.98698	-0.0085213	0.646	K0	0
Pfkfb2	11	chr1:130706426-130706482	-	CE	0.98296	0.98982	-0.0068604	0.632	K0	0
Pfkfb2	12	chr1:130705377-130705501	-	CE	0.95651	0.88163	0.07488	0.668	K1	0.875
Pfkfb2	13	chr1:130702231-130702438	-	CE	0.98127	0.98281	-0.0015327	0.524	K0	0
Pfkfb2	14	chr1:130701705-130701851	-	CE	0.98599	0.98336	0.0026314	0.516	K0	0
Pfkfb2	15	chr1:130700770-130700874	-	CE	0.98409	0.98231	0.0017794	0.527	K0	0
Pfkfb2	16	chr1:130699981-130700110	-	CE	0.97654	0.97766	-0.0011147	0.508	K0	0
Pfkfb2	17	chr1:130699188-130699250	-	CE	0.97538	0.95811	0.017271	0.65	K1	0.3299
Pfkfb2	18	chr1:130698679-130698743	-	CE	0.97576	0.98133	-0.0055696	0.563	K0	0
Pfkfb2	19	chr1:130697906-130698085	-	CE	0.85043	0.90678	-0.056357	0.666	K2	1.739
Pfkfb2	22	chr1:130697017-130697085	-	CE	0.81062	0.90501	-0.09439	0.741	K2	1.739
Pfkfb2	24	chr1:130691015-130691148	-	TE	0.0090368	0.0074178	0.001619	0.537	K3	1.8548
Pfkfb2	25	chr1:130690773-130691014	-	TE	0.18299	0.16008	0.022909	0.569	K3	1.8548
Pfkfb2	26	chr1:130690278-130690772	-	TE	0.41756	0.23399	0.18357	0.772	K3	1.8548
Pfkfb2	27	chr1:130689183-130690277	-	TE	0.26708	0.41466	-0.14758	0.774	K3	1.8548
Pfkfb2	28	chr1:130689182-130689182	-	TE	0.15081	0.20688	-0.056068	0.687	K3	1.8548
Fam117b	2	chr1:59949053-59949204	+	CE	0.97861	0.97689	0.0017204	0.503	K0	0
Fam117b	3	chr1:59952935-59953024	+	CE	0.9831	0.9829	0.00020834	0.513	K0	0
Fam117b	4	chr1:59958322-59958435	+	CE	0.9819	0.9807	0.0012023	0.525	K0	0
Fam117b	5	chr1:59968954-59969097	+	CE	0.98562	0.98006	0.0055625	0.557	K0	0
Fam117b	6	chr1:59970486-59970711	+	CE	0.98939	0.98425	0.0051361	0.61	K0	0
Fam117b	7	chr1:59974883-59975003	+	CE	0.99014	0.96602	0.024121	0.739	K1	0.3619
Ppox	2	chr1:171280674-171280768	-	CE	0.99239	0.98864	0.0037479	0.574	K0	0
Ppox	3	chr1:171280388-171280522	-	CE	0.9886	0.98284	0.0057601	0.619	K0	0
Ppox	4	chr1:171280140-171280255	-	CE	0.93349	0.89883	0.034662	0.583	K1	0.7681
Ppox	5	chr1:171279869-171280001	-	CE	0.92006	0.90455	0.015503	0.527	K1	0.7681
Ppox	6	chr1:171279430-171279574	-	CE	0.97858	0.97794	0.00063214	0.528	K0	0
Ppox	7	chr1:171279123-171279313	-	CE	0.98446	0.98244	0.0020201	0.514	K0	0
Ppox	8	chr1:171278135-171278195	-	CE	0.98804	0.98651	0.0015302	0.521	K0	0
Ppox	9	chr1:171277882-171278000	-	CE	0.99195	0.99133	0.00062101	0.517	K0	0
Ppox	10	chr1:171277694-171277804	-	CE	0.99175	0.99084	0.00090701	0.561	K0	0
Ppox	11	chr1:171277447-171277596	-	CE	0.99066	0.98811	0.0025476	0.54	K0	0
Ppox	12	chr1:171277286-171277328	-	CE	0.98948	0.98842	0.0010668	0.502	K0	0
Pam	1	chr1:98095622-98095632	-	TS	0.045191	0.12593	-0.080742	0.756	K1	0
Pam	2	chr1:98095485-98095621	-	TS	0.95471	0.87056	0.084155	0.761	K1	0
Pam	5	chr1:97975785-97975905	-	CE	0.94396	0.90155	0.042417	0.657	K0	0
Pam	6	chr1:97944620-97944677	-	CE	0.95579	0.92128	0.034511	0.62	K0	0
Pam	7	chr1:97934651-97934738	-	CE	0.971	0.93723	0.033767	0.697	K0	0
Pam	8	chr1:97924431-97924516	-	CE	0.9628	0.93782	0.024984	0.613	K0	0
Pam	9	chr1:97923094-97923177	-	CE	0.93318	0.94429	-0.011109	0.534	K0	0
Pam	10	chr1:97898341-97898389	-	CE	0.94299	0.95044	-0.0074522	0.509	K0	0
Pam	11	chr1:97897208-97897275	-	CE	0.95291	0.9567	-0.0037834	0.515	K0	0
Pam	12	chr1:97895969-97896049	-	CE	0.93694	0.88599	0.050951	0.641	K1	0.548
Pam	13	chr1:97895632-97895708	-	CE	0.96041	0.95118	0.0092373	0.524	K0	0
Pam	14	chr1:97894361-97894464	-	CE	0.95141	0.93319	0.018226	0.529	K0	0
Pam	15	chr1:97885602-97885786	-	CE	0.96646	0.95449	0.011968	0.53	K0	0
Pam	16	chr1:97884126-97884197	-	CE	0.97108	0.92937	0.041707	0.65	K0	0
Pam	17	chr1:97864203-97864520	-	CE	0.20628	0.33573	-0.12945	0.755	K1	0.848
Pam	18	chr1:97853103-97853232	-	CE	0.95168	0.92076	0.030912	0.575	K0	0
Pam	19	chr1:97844596-97844712	-	CE	0.94906	0.93493	0.014126	0.534	K0	0
Pam	20	chr1:97842232-97842304	-	CE	0.96553	0.90494	0.060594	0.725	K0	0
Pam	21	chr1:97840699-97840909	-	CE	0.96869	0.93569	0.032997	0.689	K0	0
Pam	22	chr1:97840280-97840480	-	CE	0.95558	0.93943	0.016156	0.548	K0	0
Pam	23	chr1:97837963-97838078	-	CE	0.9387	0.94207	-0.0033716	0.521	K0	0
Pam	24	chr1:97834408-97834516	-	CE	0.94701	0.94006	0.0069526	0.515	K0	0
Pam	25	chr1:97831455-97831508	-	CE	0.94272	0.93383	0.0088869	0.551	K0	0
Pam	26	chr1:97826038-97826040	-	AA	0.50262	0.77051	-0.26789	0.895	K3	2.196
Pam	27	chr1:97825837-97826037	-	CE	0.73947	0.65057	0.088905	0.646	K3	2.196
Pam	28	chr1:97822936-97822989	-	CE	0.50733	0.69975	-0.19242	0.876	K3	2.196
Pam	29	chr1:97821100-97821988	-	TE	0.97762	0.3441	0.63352	0.758	K2	0.5726
Pam	30	chr1:97821095-97821099	-	TE	0.022981	0.57066	-0.54768	0.891	K2	0.5726
Pam	31	chr1:97821094-97821094	-	TE	0.021725	0.1105	-0.088778	0.908	K2	0.5726
4732440D04Rik	1	chr1:6214591-6215293	-	TS	0.39788	0.53799	-0.1401	0.678	K1	0.9901
4732440D04Rik	2	chr1:6214233-6214590	-	TS	0.60268	0.46099	0.14169	0.711	K1	0.9901
4732440D04Rik	3	chr1:6213348-6214232	-	RI	0.95205	0.98441	-0.032355	0.754	K1	0.414
4732440D04Rik	4	chr1:6213293-6213347	-	TE	0.0021263	0.0020168	0.00010953	0.517	K1	0
4732440D04Rik	5	chr1:6209866-6213292	-	TE	0.99787	0.99801	-0.0001347	0.512	K1	0
Bpnt1	1	chr1:185332149-185332171	+	TS	0.064649	0.27536	-0.21071	0.875	K2	1.4926
Bpnt1	2	chr1:185332172-185332179	+	TS	0.71166	0.50749	0.20417	0.91	K2	1.4926
Bpnt1	3	chr1:185332180-185332263	+	TS	0.27158	0.2535	0.018077	0.521	K2	1.4926
Bpnt1	4	chr1:185338106-185338232	+	CE	0.8794	0.78876	0.090634	0.782	K1	0.8898
Bpnt1	5	chr1:185341223-185341327	+	CE	0.97969	0.98563	-0.0059421	0.617	K0	0
Bpnt1	6	chr1:185345315-185345422	+	CE	0.97993	0.98348	-0.0035513	0.537	K0	0
Bpnt1	7	chr1:185346675-185346723	+	CE	0.9733	0.96807	0.0052379	0.518	K0	0
Bpnt1	8	chr1:185348744-185348835	+	CE	0.96069	0.96513	-0.0044398	0.515	K2	0.6796
Bpnt1	9	chr1:185349837-185349881	+	CE	0.093375	0.16109	-0.067714	0.779	K2	0.7015
Bpnt1	10	chr1:185352182-185352379	+	CE	0.98174	0.98439	-0.0026405	0.539	K0	0
Bpnt1	11	chr1:185353957-185354062	+	CE	0.98097	0.96955	0.01142	0.633	K1	0.2813
Bpnt1	12	chr1:185356478-185356781	+	TE	0.50983	0.52352	-0.013692	0.589	K1	1
Bpnt1	13	chr1:185356782-185357777	+	TE	0.49221	0.47635	0.015863	0.59	K1	1
Mcmdc2	18	chr1:9920828-9921266	+	TE	0.44423	0.09098	0.35325	0.973	K1	0.9872
Mcmdc2	19	chr1:9921267-9922525	+	TE	0.55096	0.9028	-0.35184	0.977	K1	0.9872
Mcmdc2	28	chr1:9940911-9940954	+	TE	0.011782	0.012529	-0.00074728	0.52	K1	0
Mcmdc2	29	chr1:9940955-9942085	+	TE	0.98828	0.98775	0.00052643	0.513	K1	0
Dgkd	2	chr1:87880368-87880478	+	CE	0.99786	0.99869	-0.00082702	0.626	K0	0
Dgkd	3	chr1:87881859-87881939	+	CE	0.97975	0.98427	-0.0045201	0.681	K2	0.2232
Dgkd	4	chr1:87915100-87915204	+	CE	0.9981	0.99323	0.0048625	0.691	K2	0.2232
Dgkd	5	chr1:87915492-87915624	+	CE	0.99854	0.99907	-0.00052706	0.636	K0	0
Dgkd	6	chr1:87916369-87916475	+	CE	0.99858	0.99908	-0.0005003	0.574	K0	0
Dgkd	7	chr1:87916807-87916932	+	CE	0.99813	0.9988	-0.0006695	0.602	K0	0
Dgkd	8	chr1:87917892-87917994	+	CE	0.99813	0.99871	-0.00057422	0.628	K0	0
Dgkd	9	chr1:87918559-87918721	+	CE	0.99811	0.99874	-0.00062406	0.6	K0	0
Dgkd	10	chr1:87921573-87921681	+	CE	0.98929	0.97227	0.017015	0.859	K2	0.3038
Dgkd	11	chr1:87924072-87924211	+	CE	0.98189	0.99177	-0.0098788	0.769	K2	0.3038
Dgkd	12	chr1:87924480-87924564	+	CE	0.98172	0.99169	-0.0099728	0.759	K1	0.1909
Dgkd	13	chr1:87925694-87925788	+	CE	0.99846	0.99886	-0.00040789	0.577	K0	0
Dgkd	14	chr1:87925873-87925972	+	CE	0.99837	0.99877	-0.00039747	0.571	K0	0
Dgkd	15	chr1:87926051-87926324	+	CE	0.98124	0.99152	-0.010286	0.789	K1	0.1697
Dgkd	16	chr1:87926866-87927024	+	CE	0.9983	0.99872	-0.00041831	0.559	K0	0
Dgkd	17	chr1:87927685-87927810	+	CE	0.99807	0.99858	-0.00050968	0.585	K0	0
Dgkd	18	chr1:87929741-87929837	+	CE	0.99877	0.99917	-0.00039857	0.609	K0	0
Dgkd	19	chr1:87931932-87932042	+	CE	0.99892	0.99929	-0.00036511	0.576	K0	0
Dgkd	20	chr1:87934106-87934202	+	CE	0.99813	0.99876	-0.00063634	0.643	K0	0
Dgkd	21	chr1:87934394-87934501	+	CE	0.99737	0.99813	-0.0007633	0.583	K0	0
Dgkd	22	chr1:87935338-87935451	+	CE	0.95343	0.96291	-0.0094734	0.664	K1	0.3532
Dgkd	23	chr1:87936284-87936418	+	CE	0.99773	0.99839	-0.00065449	0.569	K0	0
Dgkd	24	chr1:87936749-87936900	+	CE	0.99808	0.99882	-0.00073696	0.656	K0	0
Dgkd	25	chr1:87938154-87938265	+	CE	0.998	0.9988	-0.00079829	0.642	K0	0
Dgkd	26	chr1:87938346-87938438	+	CE	0.99794	0.99858	-0.00063497	0.587	K0	0
Dgkd	27	chr1:87939196-87939315	+	CE	0.99816	0.99872	-0.000565	0.572	K0	0
Dgkd	28	chr1:87940177-87940306	+	CE	0.99724	0.99823	-0.00098953	0.618	K0	0
Dgkd	29	chr1:87941369-87941499	+	CE	0.99699	0.9978	-0.00081049	0.557	K0	0
Mpzl1	9	chr1:165593413-165593677	-	TE	0.23342	0.4136	-0.18018	0.677	K2	0.9989
Mpzl1	10	chr1:165593410-165593412	-	TE	0.10305	0.086946	0.016109	0.536	K2	0.9989
Mpzl1	11	chr1:165592240-165593409	-	TE	0.76358	0.58909	0.17448	0.67	K2	0.9989
Vash2	9	chr1:190947648-190950256	-	TE	0.51578	0.51632	-0.00053424	0.52	K1	0.7738
Vash2	10	chr1:190947646-190947647	-	TE	0.48525	0.4836	0.0016516	0.501	K1	0.7738
Ahctf1	2	chr1:179799211-179799338	-	CE	0.99404	0.99373	0.00030372	0.546	K0	0
Ahctf1	3	chr1:179795677-179795930	-	CE	0.99593	0.99506	0.00086529	0.577	K0	0
Ahctf1	4	chr1:179793643-179793823	-	CE	0.99667	0.99609	0.00057785	0.54	K0	0
Ahctf1	5	chr1:179792346-179792553	-	CE	0.99532	0.99559	-0.00026627	0.501	K0	0
Ahctf1	6	chr1:179790299-179790415	-	CE	0.99264	0.99368	-0.001033	0.534	K0	0
Ahctf1	7	chr1:179789649-179789733	-	CE	0.99177	0.99563	-0.0038616	0.704	K1	0.1077
Ahctf1	8	chr1:179788189-179788339	-	CE	0.99647	0.99577	0.00070678	0.524	K0	0
Ahctf1	9	chr1:179786968-179787100	-	CE	0.99617	0.99583	0.00033651	0.531	K0	0
Ahctf1	10	chr1:179786695-179786876	-	CE	0.99548	0.9957	-0.00022263	0.512	K0	0
Ahctf1	11	chr1:179786070-179786131	-	CE	0.99413	0.9943	-0.00017063	0.512	K0	0
Ahctf1	12	chr1:179785008-179785136	-	CE	0.99646	0.99587	0.00058819	0.526	K0	0
Ahctf1	13	chr1:179784090-179784180	-	CE	0.99674	0.99628	0.00046429	0.528	K0	0
Ahctf1	14	chr1:179782947-179783036	-	CE	0.99679	0.99658	0.00021004	0.518	K0	0
Ahctf1	15	chr1:179781643-179781783	-	CE	0.99532	0.99585	-0.00053497	0.531	K0	0
Ahctf1	16	chr1:179780856-179780960	-	CE	0.99441	0.99465	-0.00024119	0.511	K0	0
Ahctf1	17	chr1:179779604-179779697	-	CE	0.99541	0.9952	0.00020542	0.516	K0	0
Ahctf1	18	chr1:179777700-179777823	-	CE	0.99515	0.99387	0.0012769	0.541	K0	0
Ahctf1	19	chr1:179777503-179777559	-	CE	0.99484	0.99266	0.0021749	0.587	K0	0
Ahctf1	20	chr1:179776008-179776154	-	CE	0.99464	0.994	0.00063815	0.524	K0	0
Ahctf1	21	chr1:179775332-179775519	-	CE	0.99506	0.995	5.9232e-05	0.521	K0	0
Ahctf1	22	chr1:179770799-179770943	-	CE	0.99623	0.99548	0.00075053	0.539	K0	0
Ahctf1	23	chr1:179770589-179770720	-	CE	0.99297	0.9958	-0.0028338	0.631	K1	0.0781
Ahctf1	24	chr1:179769309-179769459	-	CE	0.99564	0.99538	0.00025591	0.506	K0	0
Ahctf1	25	chr1:179768989-179769139	-	CE	0.99523	0.99479	0.00043789	0.524	K0	0
Ahctf1	26	chr1:179768295-179768402	-	CE	0.99408	0.99333	0.00074875	0.508	K0	0
Ahctf1	27	chr1:179765878-179766070	-	CE	0.99404	0.99335	0.00068535	0.502	K0	0
Ahctf1	28	chr1:179763470-179763673	-	CE	0.9958	0.99531	0.00048939	0.551	K0	0
Ahctf1	29	chr1:179762545-179762962	-	CE	0.99523	0.9947	0.00052907	0.531	K0	0
Ahctf1	30	chr1:179760262-179760361	-	CE	0.99344	0.99133	0.002107	0.573	K0	0
Ahctf1	31	chr1:179757935-179758029	-	CE	0.99225	0.99005	0.0021994	0.573	K0	0
Ahctf1	32	chr1:179755449-179755654	-	CE	0.99441	0.99345	0.0009596	0.518	K0	0
Ahctf1	33	chr1:179752311-179754072	-	CE	0.99498	0.99441	0.0005677	0.541	K0	0
Ahctf1	34	chr1:179748557-179748690	-	CE	0.99001	0.9866	0.0034076	0.6	K1	0.1526
Ahctf1	35	chr1:179747180-179747256	-	CE	0.99363	0.99419	-0.00055575	0.523	K0	0
Scly	2	chr1:91300528-91300640	+	CE	0.98365	0.96754	0.01611	0.668	K0	0
Scly	3	chr1:91302769-91302869	+	CE	0.97691	0.96282	0.014097	0.624	K0	0
Scly	4	chr1:91305274-91305454	+	CE	0.98214	0.97045	0.011686	0.632	K0	0
Scly	5	chr1:91308314-91308441	+	CE	0.98887	0.97827	0.010596	0.631	K0	0
Scly	6	chr1:91308651-91308815	+	CE	0.98821	0.97806	0.010157	0.569	K0	0
Scly	7	chr1:91309797-91309903	+	CE	0.86975	0.86619	0.0035678	0.522	K1	0.8389
Scly	8	chr1:91315489-91315525	+	CE	0.98639	0.98183	0.0045556	0.586	K0	0
Scly	9	chr1:91317064-91317147	+	CE	0.98662	0.97553	0.011091	0.626	K0	0
Scly	10	chr1:91317592-91317691	+	CE	0.98148	0.94772	0.033752	0.614	K0	0
Scly	11	chr1:91319038-91319113	+	CE	0.97739	0.96682	0.010569	0.584	K0	0
Zranb3	1	chr1:128102463-128103001	-	TS	0.82307	0.85532	-0.03225	0.645	K1	0.7363
Zranb3	2	chr1:128102253-128102462	-	TS	0.17542	0.14555	0.029874	0.606	K1	0.7363
Zranb3	3	chr1:128101775-128102252	-	AD	0.22048	0.17025	0.050228	0.642	K2	0.9222
Zranb3	4	chr1:128091843-128092010	-	CE	0.97559	0.92583	0.04976	0.832	K3	0.9878
Zranb3	5	chr1:128057982-128058000	-	CE	0.93271	0.95441	-0.021691	0.632	K3	0.9878
Zranb3	6	chr1:128040818-128040996	-	CE	0.97192	0.96738	0.0045403	0.538	K0	0
Zranb3	7	chr1:128036398-128036629	-	CE	0.9779	0.97281	0.0050972	0.574	K0	0
Zranb3	8	chr1:128032849-128032934	-	CE	0.95251	0.95647	-0.0039554	0.505	K2	0.6661
Zranb3	9	chr1:128017558-128017729	-	CE	0.96122	0.91747	0.043746	0.702	K2	0.6661
Zranb3	10	chr1:128016043-128016159	-	CE	0.95156	0.95952	-0.0079539	0.58	K2	0.4085
Zranb3	11	chr1:127999341-127999460	-	CE	0.97627	0.96811	0.0081626	0.552	K0	0
Zranb3	12	chr1:127996853-127996972	-	CE	0.97877	0.96822	0.010552	0.594	K0	0
Zranb3	13	chr1:127992800-127992979	-	CE	0.98323	0.97998	0.0032554	0.538	K0	0
Zranb3	14	chr1:127987997-127988146	-	CE	0.98358	0.97618	0.0073982	0.547	K0	0
Zranb3	15	chr1:127976139-127976544	-	CE	0.97949	0.97465	0.0048361	0.543	K0	0
Zranb3	16	chr1:127972947-127973144	-	CE	0.97281	0.97442	-0.0016079	0.501	K0	0
Zranb3	17	chr1:127967878-127967969	-	CE	0.85225	0.94829	-0.096049	0.792	K1	0.7987
Zranb3	18	chr1:127965063-127965164	-	CE	0.97888	0.9668	0.012081	0.589	K0	0
Zranb3	19	chr1:127963761-127963903	-	CE	0.97834	0.9558	0.022532	0.683	K0	0
Zranb3	20	chr1:127960759-127960869	-	CE	0.9672	0.94442	0.022782	0.585	K0	0
Zranb3	21	chr1:127959710-127960100	-	CE	0.96427	0.94468	0.019594	0.664	K1	0.3259
Zranb3	22	chr1:127956537-127956668	-	CE	0.97477	0.93545	0.039325	0.702	K1	0.5604
Zranb3	23	chr1:127954670-127955065	-	TE	0.0044474	0.0051381	-0.00069067	0.545	K1	0
Zranb3	24	chr1:127954184-127954669	-	TE	0.9954	0.99479	0.0006112	0.573	K1	0
Sulf1	26	chr1:12858812-12860371	+	TE	0.88549	0.35725	0.52824	0.882	K2	0.5649
Sulf1	27	chr1:12860372-12860377	+	TE	0.11007	0.099224	0.010846	0.55	K2	0.5649
Sulf1	28	chr1:12860378-12861192	+	TE	0.10207	0.64191	-0.53984	0.883	K2	0.5649
Unc50	1	chr1:37430139-37430169	+	TS	0.79488	0.77858	0.016302	0.579	K2	0.8718
Unc50	2	chr1:37430170-37430201	+	TS	0.19908	0.2206	-0.02152	0.609	K2	0.8718
Unc50	3	chr1:37430202-37430282	+	TS	0.025245	0.018982	0.0062629	0.597	K2	0.8718
Unc50	4	chr1:37430283-37430427	+	AD	0.56934	0.59564	-0.026299	0.609	K2	1.1985
Unc50	5	chr1:37430428-37430493	+	AD	0.56331	0.57858	-0.015271	0.581	K2	1.1985
Unc50	6	chr1:37431293-37431576	+	CE	0.99361	0.99398	-0.00036648	0.51	K0	0
Unc50	7	chr1:37432551-37432671	+	CE	0.99551	0.99611	-0.0005922	0.543	K0	0
Unc50	8	chr1:37437162-37437301	+	CE	0.99532	0.99602	-0.00070153	0.552	K0	0
Unc50	9	chr1:37437377-37437478	+	CE	0.99559	0.99503	0.00056709	0.555	K0	0
Unc50	10	chr1:37438682-37438984	+	TE	0.94895	0.96773	-0.018784	0.544	K2	0.5982
Unc50	11	chr1:37438985-37438987	+	TE	0.04719	0.002261	0.04493	0.843	K2	0.5982
Unc50	12	chr1:37438988-37439124	+	TE	0.0062966	0.032439	-0.026143	0.758	K2	0.5982
Prdx6	1	chr1:161251167-161251219	-	TS	0.90081	0.93996	-0.039145	0.734	K1	0.6295
Prdx6	2	chr1:161251022-161251166	-	TS	0.099583	0.059923	0.03966	0.72	K1	0.6295
Prdx6	3	chr1:161249359-161249469	-	CE	0.035761	0.036976	-0.0012149	0.557	K2	0.3501
Prdx6	4	chr1:161247257-161247413	-	CE	0.98759	0.99767	-0.010084	0.777	K1	0.1914
Prdx6	5	chr1:161244196-161244342	-	CE	0.99802	0.99824	-0.0002201	0.501	K0	0
Prdx6	6	chr1:161243575-161243721	-	CE	0.99796	0.99818	-0.00022892	0.529	K0	0
Prdx6	7	chr1:161241598-161241849	-	TE	0.4649	0.45667	0.0082327	0.533	K1	0.9999
Prdx6	8	chr1:161240112-161241597	-	TE	0.5347	0.54347	-0.0087674	0.512	K1	0.9999
Slamf7	4	chr1:171648928-171648939	-	TS	0.076802	0.092788	-0.015987	0.581	K1	0
Slamf7	5	chr1:171648873-171648927	-	TS	0.92535	0.90603	0.019322	0.537	K1	0
Slamf7	6	chr1:171640956-171641267	-	CE	0.95706	0.95961	-0.0025462	0.511	K0	0
Slamf7	7	chr1:171638996-171639268	-	CE	0.92063	0.9447	-0.024075	0.557	K0	0
Slamf7	8	chr1:171638663-171638785	-	CE	0.9005	0.72574	0.17477	0.852	K1	0.81
Slamf7	9	chr1:171637297-171637400	-	CE	0.90335	0.87151	0.031831	0.606	K0	0
Slamf7	10	chr1:171636312-171636374	-	CE	0.88332	0.88115	0.0021622	0.518	K0	0
Slamf7	11	chr1:171636229-171636311	-	TE	0.10799	0.10792	7.0542e-05	0.504	K1	0
Slamf7	12	chr1:171635718-171636228	-	TE	0.89561	0.88783	0.0077758	0.507	K1	0
Slamf7	13	chr1:171634925-171634996	-	TE	0.32721	0.32373	0.0034707	0.509	K2	0.9972
Slamf7	14	chr1:171634474-171634924	-	TE	0.18499	0.32271	-0.13772	0.678	K2	0.9972
Slamf7	15	chr1:171632403-171634473	-	TE	0.50158	0.36506	0.13652	0.603	K2	0.9972
Cacybp	2	chr1:160208379-160208595	-	CE	0.99801	0.99767	0.0003356	0.528	K0	0
Cacybp	3	chr1:160206613-160206709	-	CE	0.99831	0.99813	0.00017259	0.504	K0	0
Cacybp	4	chr1:160206096-160206195	-	CE	0.99847	0.99835	0.00012183	0.507	K0	0
Cacybp	5	chr1:160204968-160205065	-	CE	0.99837	0.99837	2.7549e-06	0.505	K0	0
Pdcl3	2	chr1:38991246-38991375	+	CE	0.98622	0.9865	-0.00028382	0.501	K1	0.1933
Pdcl3	3	chr1:38994915-38995005	+	CE	0.99557	0.99507	0.00050405	0.526	K0	0
Pdcl3	4	chr1:38995245-38995388	+	CE	0.99436	0.99428	7.2308e-05	0.503	K0	0
Pdcl3	5	chr1:38995735-38995943	+	CE	0.99532	0.99475	0.00057842	0.518	K0	0
Degs1	2	chr1:182278976-182279718	-	CE	0.9969	0.99667	0.00022525	0.51	K0	0
1700034H15Rik	1	chr1:191907520-191907527	-	TS	0.94845	0.65609	0.29236	0.544	K1	0
1700034H15Rik	2	chr1:191907060-191907519	-	TS	0.052021	0.34221	-0.29019	0.525	K1	0
Dhx9	1	chr1:153487609-153487660	-	TS	0.3314	0.0018999	0.3295	1	K1	0.9634
Dhx9	2	chr1:153487533-153487608	-	TS	0.66821	0.9981	-0.3299	0.997	K1	0.9634
Dhx9	3	chr1:153483740-153483872	-	CE	0.99892	0.99899	-6.6297e-05	0.501	K0	0
Dhx9	4	chr1:153482742-153482882	-	CE	0.99875	0.99893	-0.00018443	0.522	K0	0
Dhx9	5	chr1:153481132-153481249	-	CE	0.99812	0.99822	-0.00010626	0.505	K0	0
Dhx9	6	chr1:153478979-153478981	-	AA	0.83952	0.84869	-0.0091724	0.582	K1	0.6875
Dhx9	7	chr1:153478866-153478978	-	CE	0.99875	0.99869	6.3573e-05	0.511	K0	0
Dhx9	8	chr1:153478041-153478189	-	CE	0.99883	0.99887	-3.0804e-05	0.53	K0	0
Dhx9	9	chr1:153475663-153475709	-	CE	0.99807	0.99799	8.0491e-05	0.525	K0	0
Dhx9	10	chr1:153473147-153473283	-	CE	0.99771	0.9976	0.00011405	0.502	K0	0
Dhx9	11	chr1:153472672-153472761	-	CE	0.99814	0.99831	-0.00016423	0.512	K0	0
Dhx9	12	chr1:153472401-153472562	-	CE	0.99878	0.99871	7.7359e-05	0.502	K0	0
Dhx9	13	chr1:153472226-153472303	-	CE	0.99902	0.99894	7.6322e-05	0.506	K0	0
Dhx9	14	chr1:153471620-153471811	-	CE	0.99911	0.99915	-3.8569e-05	0.517	K0	0
Dhx9	15	chr1:153469600-153469741	-	CE	0.99876	0.99878	-2.0235e-05	0.511	K0	0
Dhx9	16	chr1:153468874-153468956	-	CE	0.99816	0.99827	-0.00011687	0.527	K0	0
Dhx9	17	chr1:153467032-153467188	-	CE	0.99884	0.999	-0.00016717	0.542	K0	0
Dhx9	18	chr1:153465677-153465777	-	CE	0.99917	0.99927	-9.5282e-05	0.511	K0	0
Dhx9	19	chr1:153464855-153465068	-	CE	0.99902	0.99904	-2.4937e-05	0.501	K0	0
Dhx9	20	chr1:153464618-153464712	-	CE	0.99832	0.9983	1.522e-05	0.509	K0	0
Dhx9	21	chr1:153464340-153464413	-	CE	0.99864	0.99874	-9.4938e-05	0.506	K0	0
Dhx9	22	chr1:153462552-153462704	-	CE	0.99892	0.99892	-4.1682e-06	0.528	K0	0
Dhx9	23	chr1:153460982-153461142	-	CE	0.99886	0.99881	4.6084e-05	0.544	K0	0
Dhx9	24	chr1:153460278-153460389	-	CE	0.99892	0.99883	9.6643e-05	0.521	K0	0
Dhx9	25	chr1:153459558-153459719	-	CE	0.999	0.99898	2.0554e-05	0.519	K0	0
Dhx9	26	chr1:153459338-153459465	-	CE	0.99871	0.99888	-0.00017075	0.551	K0	0
Dhx9	27	chr1:153458260-153458489	-	CE	0.99799	0.99813	-0.00014025	0.511	K0	0
Dhx9	28	chr1:153458053-153458168	-	CE	0.99727	0.99721	6.1246e-05	0.514	K0	0
Dhx9	29	chr1:153457531-153457731	-	CE	0.99715	0.99731	-0.00015958	0.516	K0	0
Aida	1	chr1:183297049-183297404	+	TS	0.23992	0.12689	0.11302	0.772	K1	0.9622
Aida	2	chr1:183297405-183297628	+	TS	0.76342	0.87563	-0.11221	0.769	K1	0.9622
Aida	3	chr1:183304678-183304747	+	CE	0.98783	0.97746	0.010371	0.672	K1	0.1709
Aida	4	chr1:183306424-183306477	+	CE	0.99017	0.98835	0.0018151	0.56	K0	0
Aida	5	chr1:183306885-183306939	+	CE	0.97274	0.96789	0.004848	0.533	K1	0.3223
Aida	6	chr1:183313661-183313724	+	CE	0.9913	0.98727	0.0040325	0.551	K0	0
Aida	7	chr1:183313979-183314082	+	CE	0.99231	0.98606	0.0062479	0.611	K0	0
Aida	8	chr1:183316580-183316702	+	CE	0.98234	0.97125	0.011092	0.606	K0	0
Aida	9	chr1:183318812-183318934	+	CE	0.90078	0.92238	-0.021601	0.568	K1	0.6478
Aida	10	chr1:183322284-183322401	+	CE	0.96551	0.96269	0.0028158	0.508	K0	0
Aida	11	chr1:183322489-183323609	+	TE	0.76547	0.73927	0.026204	0.659	K1	0.9175
Aida	12	chr1:183323610-183325476	+	TE	0.23462	0.26064	-0.026019	0.66	K1	0.9175
Orc2	2	chr1:58501842-58501890	-	CE	0.98539	0.98698	-0.0015847	0.512	K0	0
Orc2	5	chr1:58500241-58500384	-	CE	0.98148	0.98763	-0.0061434	0.688	K1	0.163
Orc2	6	chr1:58497376-58497465	-	CE	0.99493	0.9953	-0.00037626	0.509	K0	0
Orc2	7	chr1:58493661-58493750	-	CE	0.99356	0.99412	-0.00056237	0.507	K0	0
Orc2	8	chr1:58492857-58492888	-	CE	0.99097	0.98936	0.0016091	0.513	K0	0
Orc2	9	chr1:58483643-58483703	-	CE	0.98704	0.98612	0.00092238	0.532	K0	0
Orc2	10	chr1:58480960-58481153	-	CE	0.99174	0.98798	0.0037569	0.52	K0	0
Orc2	11	chr1:58480251-58480349	-	CE	0.99533	0.99401	0.0013256	0.515	K0	0
Orc2	12	chr1:58476434-58476543	-	CE	0.98379	0.99519	-0.011397	0.746	K1	0.2193
Orc2	13	chr1:58474809-58474941	-	CE	0.98105	0.98767	-0.0066238	0.512	K1	0.2297
Orc2	14	chr1:58472305-58472401	-	CE	0.99232	0.99102	0.001296	0.544	K0	0
Orc2	15	chr1:58470940-58471086	-	CE	0.99438	0.99128	0.0030979	0.582	K0	0
Orc2	16	chr1:58469668-58469839	-	CE	0.99443	0.99321	0.0012242	0.539	K0	0
Orc2	17	chr1:58467651-58467712	-	CE	0.97319	0.9921	-0.018911	0.727	K1	0.3235
Orc2	18	chr1:58465995-58466113	-	CE	0.99434	0.99244	0.0019024	0.564	K0	0
Orc2	19	chr1:58464204-58464290	-	TE	0.72393	0.66291	0.061027	0.674	K1	0.9983
Orc2	20	chr1:58462771-58464203	-	TE	0.27576	0.33757	-0.061811	0.691	K1	0.9983
Fbxo28	2	chr1:182329874-182329983	-	CE	0.99579	0.99454	0.0012487	0.542	K0	0
Fbxo28	3	chr1:182326254-182326392	-	CE	0.99509	0.99415	0.00093742	0.542	K0	0
Fbxo28	4	chr1:182317810-182318005	-	CE	0.99568	0.9952	0.00048899	0.518	K0	0
A630095N17Rik	4	chr1:75220256-75220573	-	TE	0.40724	0.3566	0.050643	0.57	K1	0.9996
A630095N17Rik	5	chr1:75220095-75220255	-	TE	0.59213	0.64407	-0.051944	0.573	K1	0.9996
R3hdm1	2	chr1:128151744-128151952	+	CE	0.99413	0.99484	-0.00070599	0.51	K0	0
R3hdm1	3	chr1:128153189-128153399	+	CE	0.99482	0.99575	-0.00093421	0.563	K0	0
R3hdm1	4	chr1:128162202-128162243	+	CE	0.032908	0.029561	0.0033461	0.59	K3	0.9553
R3hdm1	5	chr1:128162769-128162858	+	CE	0.052461	0.094668	-0.042207	0.807	K3	0.9553
R3hdm1	6	chr1:128167893-128168007	+	CE	0.95842	0.96285	-0.0044305	0.633	K3	0.9553
R3hdm1	7	chr1:128168979-128169057	+	CE	0.88622	0.92763	-0.04141	0.752	K3	1.2191
R3hdm1	8	chr1:128174949-128175008	+	CE	0.94842	0.94743	0.00099811	0.526	K3	1.2191
R3hdm1	9	chr1:128175092-128175232	+	CE	0.99058	0.99069	-0.00010526	0.527	K0	0
R3hdm1	10	chr1:128178883-128178991	+	CE	0.99617	0.99579	0.0003885	0.512	K0	0
R3hdm1	11	chr1:128179087-128179182	+	CE	0.99677	0.99661	0.00016811	0.56	K0	0
R3hdm1	12	chr1:128181717-128181754	+	CE	0.99373	0.99371	1.6952e-05	0.512	K0	0
R3hdm1	13	chr1:128181838-128181888	+	CE	0.96686	0.93903	0.027824	0.776	K1	0.3516
R3hdm1	14	chr1:128181986-128182212	+	CE	0.98168	0.97984	0.0018396	0.527	K0	0
R3hdm1	15	chr1:128184400-128184654	+	CE	0.88255	0.82734	0.055208	0.74	K1	0.7464
R3hdm1	16	chr1:128186758-128186909	+	CE	0.98798	0.98567	0.0023092	0.547	K0	0
R3hdm1	18	chr1:128190638-128190739	+	CE	0.11214	0.16855	-0.056408	0.599	K1	0.8008
R3hdm1	19	chr1:128193460-128193756	+	CE	0.97965	0.9731	0.0065436	0.527	K0	0
R3hdm1	20	chr1:128196974-128197097	+	CE	0.98522	0.98474	0.00047223	0.529	K0	0
R3hdm1	21	chr1:128211205-128211359	+	CE	0.98828	0.98657	0.0017131	0.524	K0	0
R3hdm1	22	chr1:128216401-128216552	+	CE	0.98855	0.98756	0.00098442	0.555	K0	0
R3hdm1	23	chr1:128221600-128221703	+	CE	0.98866	0.9878	0.00086844	0.554	K0	0
R3hdm1	24	chr1:128223469-128223641	+	CE	0.98649	0.98556	0.00092821	0.54	K0	0
R3hdm1	25	chr1:128231323-128231467	+	CE	0.98742	0.98688	0.00054449	0.533	K0	0
R3hdm1	26	chr1:128235066-128235148	+	CE	0.99012	0.99041	-0.0002888	0.511	K0	0
R3hdm1	27	chr1:128235542-128235626	+	CE	0.99138	0.99156	-0.00017984	0.503	K0	0
Ppp1r12b	1	chr1:134955941-134955942	-	TS	0.0082798	0.009293	-0.0010132	0.516	K2	0.0043
Ppp1r12b	2	chr1:134955852-134955940	-	TS	0.99135	0.9902	0.0011503	0.539	K2	0.0043
Ppp1r12b	3	chr1:134955492-134955851	-	TS	0.0089866	0.0097991	-0.0008125	0.519	K2	0.0043
Ppp1r12b	4	chr1:134948996-134949037	-	CE	0.037519	0.051307	-0.013787	0.624	K2	1.0782
Ppp1r12b	5	chr1:134947943-134948277	-	AL	0.034344	0.033654	0.0006906	0.537	K2	1.0782
Ppp1r12b	6	chr1:134902378-134902508	-	CE	0.85601	0.87419	-0.018186	0.628	K2	0.9146
Ppp1r12b	7	chr1:134896343-134896461	-	CE	0.98209	0.97305	0.009044	0.621	K2	0.6032
Ppp1r12b	8	chr1:134893350-134893509	-	CE	0.98904	0.98353	0.0055076	0.588	K0	0
Ppp1r12b	9	chr1:134892158-134892302	-	CE	0.98676	0.98219	0.0045635	0.595	K0	0
Ppp1r12b	10	chr1:134890756-134890830	-	CE	0.98623	0.98541	0.00081631	0.525	K0	0
Ppp1r12b	11	chr1:134887275-134887354	-	CE	0.99128	0.99027	0.0010182	0.5	K0	0
Ppp1r12b	12	chr1:134886423-134886562	-	CE	0.99143	0.98872	0.0027076	0.593	K0	0
Ppp1r12b	13	chr1:134879633-134879745	-	CE	0.98532	0.9821	0.0032176	0.542	K0	0
Ppp1r12b	14	chr1:134875965-134876165	-	CE	0.98385	0.98277	0.0010789	0.521	K0	0
Ppp1r12b	15	chr1:134873939-134874021	-	CE	0.9867	0.98393	0.0027781	0.558	K0	0
Ppp1r12b	16	chr1:134872807-134872932	-	CE	0.97705	0.9689	0.0081501	0.555	K0	0
Ppp1r12b	17	chr1:134865778-134865960	-	CE	0.96925	0.95077	0.018487	0.602	K0	0
Ppp1r12b	18	chr1:134842643-134842733	-	CE	0.96245	0.95453	0.0079218	0.566	K0	0
Ppp1r12b	19	chr1:134837853-134838041	-	CE	0.97205	0.97006	0.0019921	0.501	K0	0
Ppp1r12b	20	chr1:134835978-134836167	-	CE	0.97869	0.98001	-0.0013224	0.507	K0	0
Ppp1r12b	21	chr1:134835785-134835897	-	CE	0.96395	0.97035	-0.0063946	0.545	K0	0
Ppp1r12b	22	chr1:134834435-134834476	-	CE	0.95594	0.96912	-0.013176	0.547	K0	0
Ppp1r12b	23	chr1:134782151-134782167	-	CE	0.94709	0.96548	-0.018398	0.611	K1	0.2848
Ppp1r12b	24	chr1:134777315-134777459	-	CE	0.96626	0.97915	-0.012897	0.618	K0	0
Ppp1r12b	25	chr1:134776376-134776480	-	CE	0.97061	0.96896	0.0016461	0.518	K0	0
Ppp1r12b	26	chr1:134773426-134773479	-	CE	0.97474	0.9708	0.0039374	0.512	K0	0
Ppp1r12b	27	chr1:134771998-134772048	-	CE	0.9777	0.97751	0.00018815	0.503	K0	0
Ppp1r12b	30	chr1:134759969-134760495	-	TE	0.09177	0.021765	0.070005	0.757	K1	0.7844
Ppp1r12b	31	chr1:134754658-134759968	-	TE	0.90841	0.97815	-0.06974	0.776	K1	0.7844
Gm38394	2	chr1:133653973-133654032	-	CE	0.98262	0.98214	0.00048104	0.534	K0	0
Gm38394	3	chr1:133647336-133647529	-	CE	0.98968	0.9891	0.00058028	0.55	K0	0
Gm38394	4	chr1:133645727-133645846	-	CE	0.99152	0.99223	-0.00070853	0.526	K0	0
Gm38394	5	chr1:133640612-133640735	-	CE	0.99355	0.99413	-0.00058166	0.501	K0	0
Gm38394	6	chr1:133639040-133639243	-	CE	0.99341	0.99373	-0.00031679	0.505	K0	0
Gm38394	7	chr1:133638833-133638949	-	CE	0.9914	0.99145	-5.3752e-05	0.505	K0	0
Gm38394	8	chr1:133638533-133638613	-	CE	0.98897	0.98993	-0.00095611	0.524	K0	0
Gm38394	9	chr1:133637349-133637459	-	CE	0.99186	0.99235	-0.00049513	0.51	K0	0
Gm38394	10	chr1:133635997-133636056	-	CE	0.99319	0.98591	0.0072827	0.662	K1	0.1583
Gm38394	11	chr1:133633762-133633860	-	CE	0.99376	0.99409	-0.00033072	0.527	K0	0
Gm38394	12	chr1:133626767-133627270	-	CE	0.99375	0.99452	-0.00076554	0.524	K0	0
Gm38394	13	chr1:133625848-133625930	-	CE	0.99351	0.99415	-0.00064282	0.537	K0	0
Gm38394	14	chr1:133624483-133624810	-	CE	0.99201	0.99188	0.00012946	0.53	K0	0
Gm38394	15	chr1:133622984-133623150	-	CE	0.99099	0.98993	0.0010593	0.545	K0	0
Gm38394	16	chr1:133622117-133622184	-	CE	0.99153	0.99095	0.00058143	0.533	K0	0
Cd247	1	chr1:165788681-165788688	+	TS	0.21554	0.27267	-0.057136	0.75	K2	1.7045
Cd247	2	chr1:165788689-165788722	+	TS	0.51847	0.47908	0.03939	0.725	K2	1.7045
Cd247	3	chr1:165788723-165788764	+	TS	0.2145	0.24141	-0.02691	0.7	K2	1.7045
Cd247	4	chr1:165788765-165788886	+	TS	0.052785	0.0075979	0.045187	0.999	K2	1.7045
Cd247	5	chr1:165855166-165855269	+	CE	0.99592	0.99022	0.0056986	0.87	K2	0.1287
Cd247	6	chr1:165856400-165856456	+	CE	0.99665	0.99621	0.0004331	0.586	K2	0.1287
Cd247	7	chr1:165857416-165857496	+	CE	0.99935	0.99951	-0.00016127	0.577	K0	0
Cd247	8	chr1:165858443-165858445	+	AA	0.88354	0.88784	-0.0043055	0.58	K2	0.6088
Cd247	9	chr1:165858446-165858478	+	CE	0.99935	0.99714	0.0022157	0.853	K2	0.6088
Cd247	10	chr1:165859219-165859275	+	CE	0.99924	0.9994	-0.00015868	0.563	K0	0
Cd247	11	chr1:165859789-165859824	+	CE	0.99732	0.99827	-0.00095158	0.602	K2	0.1171
Cd247	12	chr1:165861004-165862066	+	AL	0.99557	0.99323	0.0023372	0.604	K2	0.1171
Cd247	13	chr1:165866655-165866748	+	CE	0.97096	0.95598	0.014973	0.591	K0	0
Cd247	14	chr1:165866749-165866898	+	AD	0.98411	0.97925	0.0048584	0.59	K0	0
Cd247	16	chr1:165869018-165870249	+	TE	0.0012656	0.0016797	-0.00041412	0.598	K1	0
Cd247	17	chr1:165870250-165871153	+	TE	0.99872	0.99831	0.0004134	0.574	K1	0
Cops7b	4	chr1:86589164-86589341	+	CE	0.97564	0.96134	0.014297	0.593	K2	1.1649
Cops7b	5	chr1:86592291-86592366	+	CE	0.98881	0.98857	0.00024125	0.503	K0	0
Cops7b	6	chr1:86596751-86596839	+	CE	0.93315	0.97273	-0.039588	0.834	K1	0.463
Cops7b	7	chr1:86599003-86599205	+	CE	0.99146	0.99061	0.0008422	0.516	K0	0
Cops7b	8	chr1:86601083-86601188	+	CE	0.98803	0.98722	0.00081167	0.523	K0	0
Cops7b	9	chr1:86605058-86606500	+	TE	0.88861	0.89382	-0.0052064	0.508	K1	0.6692
Cops7b	10	chr1:86606501-86609375	+	TE	0.11149	0.10677	0.0047142	0.505	K1	0.6692
Rftn2	2	chr1:55214120-55214303	-	CE	0.89399	0.88293	0.011061	0.501	K0	0
Rftn2	3	chr1:55211150-55211261	-	CE	0.91328	0.91821	-0.004939	0.504	K0	0
Rftn2	4	chr1:55206336-55206615	-	CE	0.89031	0.88284	0.0074756	0.508	K0	0
Rftn2	5	chr1:55204183-55204392	-	CE	0.92433	0.91237	0.011962	0.538	K0	0
Rftn2	7	chr1:55195516-55195637	-	CE	0.91111	0.92152	-0.010414	0.523	K0	0
Rftn2	8	chr1:55194244-55194347	-	CE	0.86036	0.91386	-0.053498	0.634	K0	0
Rftn2	9	chr1:55184950-55185028	-	CE	0.88912	0.87907	0.010049	0.504	K0	0
Usp40	1	chr1:88008535-88008551	-	TS	0.82885	0.80373	0.025121	0.603	K1	0.7561
Usp40	2	chr1:88008438-88008534	-	TS	0.17164	0.19408	-0.022441	0.578	K1	0.7561
Usp40	3	chr1:88007225-88007442	-	CE	0.97645	0.97815	-0.001693	0.521	K0	0
Usp40	4	chr1:88004247-88004314	-	CE	0.97962	0.92477	0.054848	0.874	K1	0.4161
Usp40	5	chr1:88002409-88002522	-	CE	0.98509	0.98533	-0.00023894	0.501	K0	0
Usp40	6	chr1:87999740-87999904	-	CE	0.98568	0.98669	-0.0010085	0.53	K0	0
Usp40	7	chr1:87997813-87997959	-	CE	0.98587	0.98489	0.00098209	0.516	K0	0
Usp40	8	chr1:87995711-87995854	-	CE	0.98459	0.98536	-0.00077153	0.512	K0	0
Usp40	9	chr1:87994174-87994302	-	CE	0.98677	0.98815	-0.0013797	0.521	K0	0
Usp40	10	chr1:87990062-87990157	-	CE	0.98907	0.98887	0.00019698	0.511	K0	0
Usp40	11	chr1:87988885-87988992	-	CE	0.98495	0.98743	-0.0024828	0.531	K0	0
Usp40	12	chr1:87985902-87986199	-	CE	0.98552	0.98558	-5.96e-05	0.524	K0	0
Usp40	13	chr1:87983754-87983835	-	CE	0.98364	0.97921	0.0044225	0.559	K0	0
Usp40	14	chr1:87982009-87982180	-	CE	0.98495	0.98314	0.0018128	0.504	K0	0
Usp40	15	chr1:87980971-87981055	-	CE	0.98904	0.98877	0.00026629	0.522	K0	0
Usp40	16	chr1:87980015-87980085	-	CE	0.98925	0.98924	1.6627e-06	0.523	K0	0
Usp40	17	chr1:87978311-87978633	-	CE	0.98429	0.984	0.00028606	0.549	K0	0
Usp40	18	chr1:87975808-87975931	-	CE	0.97668	0.9696	0.0070836	0.539	K0	0
Usp40	19	chr1:87974077-87974134	-	CE	0.8161	0.88106	-0.064959	0.711	K2	1.4865
Usp40	20	chr1:87968396-87968449	-	CE	0.72106	0.71248	0.0085768	0.5	K2	1.4865
Usp40	21	chr1:87967510-87967598	-	CE	0.97679	0.96773	0.0090649	0.575	K0	0
Usp40	22	chr1:87967184-87967270	-	CE	0.97539	0.9733	0.0020864	0.516	K0	0
Usp40	23	chr1:87965306-87965342	-	CE	0.97494	0.97212	0.0028146	0.54	K0	0
Usp40	24	chr1:87962424-87962488	-	CE	0.97367	0.97456	-0.00088555	0.542	K0	0
Usp40	25	chr1:87959789-87959863	-	CE	0.9771	0.98028	-0.0031831	0.52	K0	0
Usp40	26	chr1:87957211-87957334	-	CE	0.97645	0.97318	0.0032788	0.531	K0	0
Usp40	27	chr1:87954151-87954245	-	CE	0.97235	0.9562	0.016152	0.569	K0	0
Usp40	28	chr1:87952340-87952458	-	CE	0.97501	0.94838	0.026632	0.532	K0	0
Usp40	29	chr1:87951643-87951708	-	CE	0.97502	0.95503	0.019991	0.599	K0	0
Usp40	30	chr1:87950159-87950369	-	CE	0.9766	0.97304	0.0035548	0.548	K0	0
Usp40	31	chr1:87949932-87950027	-	CE	0.97767	0.97803	-0.00035762	0.539	K0	0
Usp40	32	chr1:87948502-87948596	-	CE	0.97275	0.96987	0.0028843	0.526	K0	0
Usp40	33	chr1:87946443-87946707	-	TE	0.0016048	0.0013068	0.00029802	0.533	K1	0
Usp40	34	chr1:87945121-87946442	-	TE	0.99833	0.99872	-0.00038852	0.536	K1	0
Ptprn	10	chr1:75255125-75255211	-	CE	0.86781	0.8872	-0.019389	0.571	K0	0
Ptprn	12	chr1:75254585-75254649	-	CE	0.87768	0.74529	0.13239	0.665	K1	0.9877
Cnih4	2	chr1:181150931-181151061	+	AF	0.96059	0.96828	-0.007686	0.52	K1	0.3652
Cnih4	3	chr1:181153735-181153803	+	CE	0.97008	0.98035	-0.010267	0.505	K1	0.3652
Cnih4	4	chr1:181155859-181155971	+	CE	0.99425	0.99171	0.0025387	0.527	K0	0
Cnih4	5	chr1:181162075-181162215	+	CE	0.9929	0.99062	0.002284	0.536	K0	0
Cnih4	6	chr1:181166181-181166248	+	TE	0.30333	0.85709	-0.55376	0.761	K1	0.7654
Cnih4	7	chr1:181166249-181168994	+	TE	0.69651	0.14327	0.55323	0.758	K1	0.7654
Klf7	1	chr1:64121483-64121491	-	TS	0.55602	0.43344	0.12259	0.603	K1	0.9009
Klf7	2	chr1:64121386-64121482	-	TS	0.4413	0.56798	-0.12668	0.597	K1	0.9009
Klf7	3	chr1:64121140-64121385	-	RI	0.84876	0.7715	0.077264	0.724	K2	0.9279
Klf7	4	chr1:64120900-64121139	-	CE	0.98697	0.9873	-0.00033418	0.508	K3	0.7276
Klf7	5	chr1:64078707-64079334	-	CE	0.98658	0.9759	0.010675	0.702	K3	0.7276
Klf7	6	chr1:64042314-64042437	-	CE	0.98712	0.99088	-0.0037598	0.583	K0	0
Nav1	29	chr1:135452172-135452407	-	CE	0.86406	0.91739	-0.053325	0.623	K0	0
Nav1	35	chr1:135438848-135441779	-	TE	0.67363	0.68944	-0.01581	0.519	K1	0.9914
Nav1	36	chr1:135434580-135438847	-	TE	0.32663	0.30991	0.016712	0.53	K1	0.9914
A130010J15Rik	4	chr1:193173577-193173579	+	TS	0.062029	0.50239	-0.44037	0.657	K1	0
A130010J15Rik	5	chr1:193173580-193173770	+	TS	0.93824	0.49673	0.44152	0.635	K1	0
A130010J15Rik	7	chr1:193174245-193176298	+	TE	0.29242	0.22382	0.068597	0.584	K2	1.4202
A130010J15Rik	8	chr1:193176299-193176300	+	TE	0.25971	0.25971	3.9226e-08	0.543	K2	1.4202
A130010J15Rik	9	chr1:193176301-193177832	+	TE	0.45026	0.51793	-0.067668	0.658	K2	1.4202
Gm15832	2	chr1:39548926-39549116	-	CE	0.90349	0.93737	-0.033881	0.618	K0	0
Nif3l1	1	chr1:58445151-58445266	+	TS	0.11414	0.1943	-0.080166	0.697	K1	0.8872
Nif3l1	2	chr1:58445267-58445634	+	TS	0.88456	0.80592	0.078642	0.664	K1	0.8872
Nif3l1	4	chr1:58447634-58448089	+	CE	0.97162	0.98051	-0.0088952	0.65	K2	0.4194
Nif3l1	5	chr1:58450387-58450549	+	CE	0.98106	0.98235	-0.001284	0.528	K0	0
Nif3l1	6	chr1:58452089-58452215	+	CE	0.97936	0.98247	-0.0031121	0.513	K0	0
Nif3l1	7	chr1:58455597-58455735	+	CE	0.98047	0.97289	0.0075807	0.637	K2	0.3925
Nif3l1	8	chr1:58457780-58457863	+	CE	0.96379	0.89555	0.068238	0.673	K2	0.7227
Nif3l1	9	chr1:58461141-58462266	+	TE	0.33964	0.41367	-0.074037	0.768	K1	0.9946
Nif3l1	10	chr1:58462267-58463456	+	TE	0.65971	0.58831	0.071399	0.755	K1	0.9946
BC094916	2	chr1:173529274-173529555	-	CE	0.9754	0.98542	-0.010024	0.586	K0	0
BC094916	3	chr1:173527842-173527978	-	CE	0.94092	0.96434	-0.023415	0.583	K0	0
BC094916	4	chr1:173526464-173526703	-	CE	0.8852	0.91091	-0.025709	0.57	K0	0
Rabgap1l	1	chr1:160792939-160792946	-	TS	0.86454	0.9725	-0.10796	0.7	K1	0.9397
Rabgap1l	2	chr1:160792736-160792938	-	TS	0.1365	0.026372	0.11013	0.681	K1	0.9397
Rabgap1l	3	chr1:160740884-160740931	-	CE	0.99158	0.98115	0.010424	0.688	K2	0.3833
Rabgap1l	4	chr1:160740800-160740883	-	RI	0.87619	0.87002	0.0061662	0.502	K2	0.6926
Rabgap1l	5	chr1:160740752-160740799	-	CE	0.99326	0.99152	0.0017402	0.566	K0	0
Rabgap1l	6	chr1:160738896-160739088	-	CE	0.99225	0.99247	-0.00022388	0.512	K0	0
Rabgap1l	7	chr1:160735548-160735758	-	CE	0.99344	0.9943	-0.00085607	0.5	K0	0
Rabgap1l	8	chr1:160733529-160733703	-	CE	0.99267	0.99338	-0.00070322	0.507	K0	0
Rabgap1l	9	chr1:160724032-160724189	-	CE	0.99136	0.9898	0.0015555	0.567	K0	0
Rabgap1l	10	chr1:160722133-160722243	-	CE	0.99449	0.99374	0.00075142	0.524	K0	0
Rabgap1l	11	chr1:160710147-160710213	-	CE	0.97942	0.9593	0.020125	0.76	K1	0.3652
Rabgap1l	12	chr1:160702358-160702460	-	CE	0.99234	0.99231	2.7798e-05	0.506	K0	0
Rabgap1l	13	chr1:160700712-160700878	-	CE	0.99269	0.99267	1.9952e-05	0.54	K0	0
Rabgap1l	14	chr1:160682041-160682182	-	CE	0.99329	0.99153	0.0017648	0.547	K0	0
Rabgap1l	15	chr1:160672451-160672701	-	AL	0.014121	0.018568	-0.0044474	0.569	K0	0
Rabgap1l	16	chr1:160645308-160645401	-	CE	0.99336	0.9914	0.0019567	0.578	K0	0
Rabgap1l	17	chr1:160627215-160627365	-	CE	0.99202	0.95834	0.033678	0.77	K1	0.4517
Rabgap1l	18	chr1:160471998-160472111	-	CE	0.9878	0.98659	0.0012066	0.525	K0	0
Rabgap1l	19	chr1:160453751-160453825	-	CE	0.98762	0.98417	0.0034444	0.57	K0	0
Rabgap1l	20	chr1:160443191-160443316	-	CE	0.97854	0.969	0.0095376	0.569	K0	0
Rabgap1l	21	chr1:160441823-160441966	-	CE	0.95282	0.94637	0.0064531	0.537	K0	0
Rabgap1l	22	chr1:160392182-160392223	-	CE	0.95698	0.95985	-0.0028636	0.504	K0	0
Rabgap1l	23	chr1:160351221-160351571	-	AF	0.065029	0.069559	-0.0045299	0.502	K0	0
Rabgap1l	24	chr1:160342036-160342164	-	CE	0.96636	0.97042	-0.0040664	0.532	K0	0
Rabgap1l	25	chr1:160257443-160257535	-	CE	0.9899	0.98667	0.0032327	0.582	K0	0
Rabgap1l	26	chr1:160257205-160257266	-	AL	0.55188	0.4381	0.11378	0.815	K1	0.9982
Rabgap1l	27	chr1:160247459-160247569	-	CE	0.99379	0.99291	0.00087876	0.523	K0	0
Rabgap1l	28	chr1:160238531-160238635	-	CE	0.99633	0.99526	0.0010741	0.566	K0	0
Rabgap1l	29	chr1:160236626-160236709	-	CE	0.99649	0.99535	0.0011367	0.569	K0	0
Rabgap1l	30	chr1:160231796-160231867	-	CE	0.996	0.9946	0.0013987	0.596	K0	0
Rabgap1l	31	chr1:160226485-160226682	-	CE	0.99555	0.99356	0.0019978	0.581	K0	0
Xpr1	1	chr1:155417408-155417415	-	TS	0.089851	0.014909	0.074942	0.751	K2	1.5102
Xpr1	2	chr1:155417330-155417407	-	TS	0.82017	0.59747	0.22269	0.732	K2	1.5102
Xpr1	3	chr1:155417166-155417329	-	TS	0.10228	0.40326	-0.30098	0.764	K2	1.5102
Xpr1	4	chr1:155384611-155384662	-	CE	0.99133	0.99106	0.00026715	0.507	K0	0
Xpr1	5	chr1:155345553-155345654	-	CE	0.98544	0.99181	-0.0063655	0.678	K1	0.1261
Xpr1	6	chr1:155332163-155332386	-	CE	0.98933	0.98867	0.00065989	0.501	K0	0
Xpr1	7	chr1:155330338-155330487	-	CE	0.99069	0.99059	0.00010046	0.534	K0	0
Xpr1	8	chr1:155328599-155328682	-	CE	0.9911	0.99252	-0.0014276	0.533	K0	0
Xpr1	9	chr1:155324314-155324395	-	CE	0.99134	0.99344	-0.0021052	0.581	K0	0
Xpr1	10	chr1:155313171-155313361	-	CE	0.99236	0.99303	-0.00066372	0.523	K0	0
Xpr1	11	chr1:155312759-155312938	-	CE	0.99209	0.99205	4.8399e-05	0.509	K0	0
Xpr1	12	chr1:155308951-155309122	-	CE	0.99163	0.99479	-0.0031556	0.577	K0	0
Xpr1	13	chr1:155307622-155307816	-	CE	0.99247	0.99449	-0.0020188	0.576	K0	0
Xpr1	14	chr1:155293109-155293275	-	CE	0.98164	0.99133	-0.0096901	0.749	K1	0.1321
Xpr1	15	chr1:155290195-155290331	-	CE	0.98147	0.99061	-0.0091436	0.666	K1	0.1856
Xpr1	16	chr1:155283213-155283434	-	CE	0.99156	0.99037	0.0011941	0.539	K0	0
Xpr1	18	chr1:155278982-155281070	-	TE	0.08308	0.10085	-0.017775	0.673	K1	0.5931
Xpr1	19	chr1:155275701-155278981	-	TE	0.91698	0.89918	0.017803	0.639	K1	0.5931
Rc3h1	4	chr1:160938112-160938232	+	CE	0.99563	0.99584	-0.00021033	0.517	K0	0
Rc3h1	5	chr1:160939995-160940234	+	CE	0.996	0.99586	0.00014423	0.536	K0	0
Rc3h1	6	chr1:160940819-160940994	+	CE	0.996	0.99587	0.00012769	0.517	K0	0
Rc3h1	7	chr1:160942528-160942728	+	CE	0.99611	0.99643	-0.00031909	0.5	K0	0
Rc3h1	8	chr1:160946534-160946666	+	CE	0.99609	0.99629	-0.00020041	0.517	K0	0
Rc3h1	9	chr1:160948307-160948425	+	CE	0.99243	0.99608	-0.0036469	0.611	K1	0.0919
Rc3h1	10	chr1:160950222-160950334	+	CE	0.99616	0.99578	0.00038045	0.531	K0	0
Rc3h1	11	chr1:160950841-160951122	+	CE	0.99596	0.99671	-0.00074402	0.54	K0	0
Rc3h1	12	chr1:160951615-160951829	+	CE	0.99608	0.9967	-0.0006153	0.542	K0	0
Rc3h1	13	chr1:160954784-160955151	+	CE	0.99505	0.99519	-0.00013498	0.511	K0	0
Rc3h1	14	chr1:160955815-160955979	+	CE	0.99166	0.99567	-0.0040051	0.624	K2	0.1467
Rc3h1	15	chr1:160959401-160959553	+	CE	0.99102	0.99312	-0.0020988	0.503	K2	0.1467
Rc3h1	16	chr1:160962271-160962484	+	CE	0.99691	0.99692	-1.0092e-05	0.526	K0	0
Rc3h1	17	chr1:160963479-160963569	+	CE	0.99497	0.99549	-0.00051622	0.547	K0	0
Rc3h1	18	chr1:160963708-160963840	+	CE	0.99386	0.99465	-0.00078526	0.526	K0	0
Rc3h1	19	chr1:160964950-160964976	+	AA	0.93819	0.97446	-0.036278	0.876	K1	0.3473
Rc3h1	20	chr1:160964977-160965120	+	CE	0.99444	0.99487	-0.00043276	0.503	K0	0
Rc3h1	21	chr1:160965673-160965788	+	CE	0.99577	0.99643	-0.0006582	0.555	K0	0
Rc3h1	22	chr1:160967647-160967817	+	TE	0.41	0.30707	0.10293	0.982	K1	0.9946
Rc3h1	23	chr1:160967818-160974978	+	TE	0.59015	0.69282	-0.10267	0.964	K1	0.9946
Desi2	1	chr1:178187417-178187531	+	TS	0.93855	0.9702	-0.031653	0.741	K1	0.5166
Desi2	2	chr1:178187532-178187957	+	TS	0.061695	0.029808	0.031888	0.743	K1	0.5166
Desi2	3	chr1:178198218-178198290	+	CE	0.29208	0.14568	0.1464	0.8	K2	0.9992
Desi2	4	chr1:178237912-178237984	+	CE	0.99	0.97774	0.012262	0.736	K2	0.686
Desi2	5	chr1:178242612-178242705	+	CE	0.98984	0.99048	-0.00064323	0.534	K0	0
Desi2	6	chr1:178244341-178244482	+	CE	0.99264	0.98926	0.0033786	0.551	K0	0
Desi2	9	chr1:178256103-178257295	+	TE	0.64451	0.33666	0.30785	0.724	K1	0.0042
Desi2	10	chr1:178257296-178257301	+	TE	0.35364	0.66485	-0.31122	0.736	K1	0.0042
Fam20b	1	chr1:156719073-156719086	-	TS	0.93921	0.92385	0.015363	0.546	K1	0
Fam20b	2	chr1:156718866-156719072	-	TS	0.060513	0.074208	-0.013696	0.55	K1	0
Fam20b	3	chr1:156716888-156716980	-	CE	0.72929	0.80246	-0.073174	0.762	K1	0.9291
Fam20b	4	chr1:156705668-156706167	-	CE	0.9932	0.98581	0.0073928	0.655	K0	0
Fam20b	5	chr1:156702399-156702485	-	CE	0.99336	0.98934	0.0040123	0.58	K0	0
Fam20b	6	chr1:156698727-156698836	-	CE	0.9912	0.98525	0.0059569	0.62	K0	0
Fam20b	7	chr1:156690477-156690648	-	CE	0.9928	0.98772	0.0050802	0.612	K0	0
Fam20b	8	chr1:156687356-156687547	-	CE	0.99117	0.98728	0.0038897	0.548	K0	0
Fam20b	9	chr1:156686191-156686250	-	CE	0.98986	0.98476	0.0050988	0.594	K0	0
Fam20b	10	chr1:156678571-156681642	-	TE	0.99943	0.99906	0.00036196	0.607	K1	0
Fam20b	11	chr1:156678532-156678570	-	TE	0.00055687	0.00092646	-0.00036959	0.6	K1	0
Trmt1l	2	chr1:151433794-151433904	+	CE	0.98965	0.98945	0.0002026	0.51	K0	0
Trmt1l	3	chr1:151435728-151435841	+	CE	0.98926	0.99103	-0.0017747	0.538	K0	0
Trmt1l	4	chr1:151439516-151439580	+	CE	0.97894	0.9923	-0.013352	0.748	K1	0.2282
Trmt1l	5	chr1:151440806-151440935	+	CE	0.99248	0.99196	0.00051963	0.509	K0	0
Trmt1l	6	chr1:151442587-151442710	+	CE	0.99194	0.98072	0.011218	0.688	K1	0.2138
Trmt1l	7	chr1:151443247-151443326	+	CE	0.99056	0.99115	-0.00059185	0.523	K0	0
Trmt1l	8	chr1:151448254-151448497	+	CE	0.99032	0.98903	0.0012843	0.531	K0	0
Trmt1l	9	chr1:151449900-151450112	+	CE	0.98964	0.98777	0.0018623	0.519	K0	0
Trmt1l	10	chr1:151452048-151452238	+	CE	0.98875	0.98627	0.0024792	0.562	K0	0
Trmt1l	11	chr1:151453077-151453155	+	CE	0.99112	0.98975	0.0013703	0.553	K0	0
Trmt1l	12	chr1:151453885-151454051	+	CE	0.99449	0.99397	0.00051409	0.541	K0	0
Trmt1l	13	chr1:151454978-151455040	+	CE	0.98964	0.9949	-0.0052561	0.632	K1	0.1281
Trmt1l	14	chr1:151457463-151457589	+	CE	0.99456	0.99351	0.0010487	0.529	K0	0
Taf1a	2	chr1:183390921-183391044	+	CE	0.98665	0.98624	0.00041225	0.504	K0	0
Taf1a	3	chr1:183395910-183396079	+	CE	0.94198	0.97034	-0.028359	0.783	K1	0.3568
Taf1a	4	chr1:183397780-183397893	+	CE	0.94431	0.9806	-0.03629	0.872	K1	0.3568
Taf1a	5	chr1:183400603-183400801	+	CE	0.98879	0.99025	-0.0014569	0.548	K0	0
Taf1a	6	chr1:183402620-183402750	+	CE	0.98969	0.98945	0.00024565	0.518	K0	0
Taf1a	7	chr1:183404327-183404485	+	CE	0.98688	0.98595	0.00092632	0.512	K0	0
Taf1a	8	chr1:183405896-183405962	+	CE	0.93969	0.81149	0.1282	0.766	K2	0.9673
Taf1a	9	chr1:183406544-183406635	+	CE	0.94061	0.87288	0.067736	0.699	K2	0.835
Taf1a	12	chr1:183408609-183408763	+	CE	0.93318	0.93786	-0.0046868	0.52	K0	0
Tnr	24	chr1:159924094-159924397	+	TE	0.055976	0.02713	0.028846	0.618	K1	0
Tnr	25	chr1:159924398-159931729	+	TE	0.94459	0.97256	-0.027967	0.617	K1	0
Vangl2	4	chr1:172013083-172013345	-	CE	0.97736	0.98089	-0.0035266	0.522	K0	0
Vangl2	5	chr1:172012828-172012948	-	CE	0.98594	0.98969	-0.003754	0.564	K0	0
Vangl2	6	chr1:172009441-172010048	-	CE	0.98157	0.98665	-0.0050722	0.578	K0	0
Vangl2	7	chr1:172008799-172008918	-	CE	0.11539	0.10527	0.010126	0.502	K2	0.6517
Vangl2	8	chr1:172008507-172008643	-	CE	0.93348	0.939	-0.005524	0.525	K2	0.6517
Vangl2	9	chr1:172007911-172008046	-	CE	0.97408	0.97744	-0.0033589	0.512	K0	0
Vangl2	10	chr1:172006090-172006321	-	CE	0.97946	0.98283	-0.0033738	0.564	K0	0
Vangl2	11	chr1:172004429-172004862	-	TE	0.13709	0.26102	-0.12393	0.699	K1	0.9873
Vangl2	12	chr1:172000960-172004428	-	TE	0.86272	0.73912	0.12361	0.726	K1	0.9873
Tpp2	1	chr1:43934007-43934014	+	TS	0.16736	0.051694	0.11567	0.581	K1	0.9999
Tpp2	2	chr1:43934015-43934253	+	TS	0.83185	0.94807	-0.11622	0.592	K1	0.9999
Tpp2	3	chr1:43940110-43940238	+	CE	0.99578	0.99672	-0.00093984	0.531	K1	0.0611
Tpp2	4	chr1:43949312-43949407	+	CE	0.99619	0.99846	-0.002268	0.618	K1	0.0611
Tpp2	5	chr1:43951107-43951211	+	CE	0.99567	0.99795	-0.0022839	0.651	K1	0.0611
Tpp2	6	chr1:43953257-43953381	+	CE	0.99772	0.99773	-5.3417e-06	0.505	K0	0
Tpp2	7	chr1:43954577-43954740	+	CE	0.99564	0.99753	-0.0018836	0.673	K2	0.6284
Tpp2	8	chr1:43956471-43956625	+	CE	0.99552	0.997	-0.0014799	0.594	K2	0.6284
Tpp2	9	chr1:43957436-43957512	+	CE	0.99571	0.99742	-0.0017058	0.612	K2	0.6284
Tpp2	10	chr1:43960084-43960211	+	CE	0.99596	0.99776	-0.0018055	0.644	K2	0.6284
Tpp2	11	chr1:43960868-43960967	+	CE	0.99517	0.99731	-0.0021467	0.653	K2	0.6284
Tpp2	12	chr1:43968882-43969030	+	CE	0.99287	0.99721	-0.0043335	0.765	K2	0.6284
Tpp2	13	chr1:43970401-43970516	+	CE	0.99604	0.99787	-0.0018329	0.647	K2	0.6284
Tpp2	14	chr1:43971564-43971732	+	CE	0.99553	0.99715	-0.0016159	0.632	K2	0.6284
Tpp2	15	chr1:43972530-43972687	+	CE	0.99444	0.99584	-0.0014012	0.617	K2	0.6284
Tpp2	16	chr1:43973444-43973520	+	CE	0.99544	0.9979	-0.0024677	0.776	K2	0.6284
Tpp2	17	chr1:43975416-43975522	+	CE	0.99683	0.99834	-0.0015059	0.657	K2	0.6284
Tpp2	18	chr1:43977207-43977361	+	CE	0.99628	0.99796	-0.0016804	0.667	K2	0.6284
Tpp2	19	chr1:43978413-43978529	+	CE	0.99644	0.99848	-0.0020389	0.651	K2	0.6284
Tpp2	20	chr1:43978735-43978835	+	CE	0.99636	0.9983	-0.001937	0.691	K2	0.6284
Tpp2	21	chr1:43980308-43980404	+	CE	0.99326	0.9912	0.0020623	0.643	K2	0.6284
Tpp2	22	chr1:43981730-43981867	+	CE	0.99601	0.99627	-0.00026235	0.506	K2	0.6284
Tpp2	23	chr1:43983072-43983316	+	CE	0.99616	0.99689	-0.00073145	0.553	K3	0.6284
Tpp2	24	chr1:43983514-43983592	+	CE	0.99124	0.989	0.0022462	0.561	K3	0.6596
Tpp2	25	chr1:43985416-43985454	+	CE	0.13268	0.10423	0.028454	0.696	K2	0.6609
Tpp2	26	chr1:43990511-43990662	+	CE	0.99516	0.99608	-0.00092008	0.583	K2	0.6284
Tpp2	27	chr1:43991263-43991359	+	CE	0.99576	0.997	-0.0012435	0.584	K2	0.6284
Tpp2	28	chr1:43992264-43992394	+	CE	0.99524	0.99667	-0.0014326	0.637	K2	0.6284
Tpp2	29	chr1:43999628-43999835	+	CE	0.99639	0.99646	-6.6696e-05	0.51	K0	0
Tpp2	30	chr1:44001319-44001438	+	CE	0.99713	0.9975	-0.00036214	0.529	K0	0
Tpp2	31	chr1:44002104-44002971	+	TE	0.48851	0.49107	-0.002563	0.533	K1	0.9967
Tpp2	32	chr1:44002972-44003000	+	TE	0.51144	0.50915	0.0022886	0.516	K1	0.9967
Gm15834	4	chr1:58510571-58510644	+	CE	0.9079	0.86472	0.043179	0.627	K0	0
Gm15834	5	chr1:58510645-58512138	+	RI	0.87077	0.75041	0.12036	0.797	K1	0.7143
Gm15834	6	chr1:58512139-58512266	+	CE	0.85351	0.7398	0.11371	0.783	K1	0.7143
Gm15834	7	chr1:58515712-58515777	+	CE	0.91041	0.9167	-0.0062851	0.522	K0	0
Gm15834	8	chr1:58515778-58517062	+	RI	0.7483	0.62712	0.12118	0.604	K2	1.5096
Gm15834	9	chr1:58517063-58517169	+	CE	0.75796	0.61203	0.14593	0.627	K2	1.5096
Stk25	2	chr1:93635298-93635383	-	CE	0.99348	0.99294	0.00053777	0.529	K0	0
Stk25	3	chr1:93629034-93629264	-	CE	0.99589	0.99601	-0.00011995	0.501	K0	0
Stk25	4	chr1:93627654-93627710	-	CE	0.98675	0.97616	0.010595	0.593	K1	0.331
Stk25	5	chr1:93627025-93627133	-	CE	0.99571	0.99484	0.00087282	0.517	K0	0
Stk25	6	chr1:93626051-93626208	-	CE	0.99459	0.99469	-0.00010378	0.52	K0	0
Stk25	7	chr1:93625781-93625966	-	CE	0.99661	0.99608	0.00052967	0.524	K0	0
Stk25	8	chr1:93625461-93625606	-	CE	0.99654	0.99599	0.00054926	0.508	K0	0
Stk25	9	chr1:93625034-93625148	-	CE	0.93433	0.90852	0.025803	0.679	K1	0.6013
Stk25	10	chr1:93624553-93624624	-	CE	0.99722	0.99702	0.00019686	0.504	K0	0
Stk25	11	chr1:93623396-93623532	-	CE	0.9976	0.99721	0.00039061	0.542	K0	0
Gls	1	chr1:52233224-52233232	-	TS	0.70452	0.69308	0.011441	0.509	K1	0.9961
Gls	2	chr1:52232592-52233223	-	TS	0.29554	0.30753	-0.011992	0.523	K1	0.9961
Gls	3	chr1:52232096-52232296	-	AF	0.0060535	0.0068588	-0.00080532	0.546	K0	0
Gls	4	chr1:52219943-52220039	-	CE	0.99811	0.99819	-7.7961e-05	0.502	K0	0
Gls	5	chr1:52219488-52219609	-	CE	0.99858	0.99849	8.9052e-05	0.506	K0	0
Gls	6	chr1:52215565-52215694	-	CE	0.99897	0.99871	0.00025802	0.532	K0	0
Gls	7	chr1:52214478-52214557	-	CE	0.99899	0.99879	0.00020464	0.534	K0	0
Gls	8	chr1:52212203-52212366	-	CE	0.99871	0.99852	0.00018951	0.534	K0	0
Gls	9	chr1:52207301-52207359	-	CE	0.99902	0.99887	0.00015213	0.53	K0	0
Gls	10	chr1:52199855-52199887	-	CE	0.99906	0.9988	0.00026624	0.561	K0	0
Gls	11	chr1:52199711-52199769	-	CE	0.99871	0.99883	-0.00012515	0.508	K0	0
Gls	12	chr1:52196743-52196809	-	CE	0.99836	0.99849	-0.00013045	0.528	K0	0
Gls	13	chr1:52196165-52196215	-	CE	0.99831	0.99804	0.00027663	0.551	K0	0
Gls	14	chr1:52191111-52191287	-	CE	0.99852	0.99832	0.00020281	0.53	K0	0
Gls	15	chr1:52189423-52189554	-	CE	0.99875	0.99852	0.00023292	0.528	K0	0
Gls	16	chr1:52188679-52188771	-	CE	0.99874	0.99847	0.00026574	0.554	K0	0
Gls	17	chr1:52184104-52187794	-	AL	0.88692	0.84965	0.037277	0.771	K1	0.7054
Gls	18	chr1:52168897-52168958	-	CE	0.98452	0.98691	-0.002393	0.527	K0	0
Gls	19	chr1:52168485-52168561	-	CE	0.98019	0.98205	-0.0018625	0.504	K0	0
Gls	20	chr1:52168336-52168399	-	CE	0.98205	0.9812	0.00085056	0.519	K0	0
Gls	21	chr1:52165941-52166314	-	TE	0.15049	0.26753	-0.11704	0.827	K1	0.9345
Gls	22	chr1:52163448-52165940	-	TE	0.84967	0.7322	0.11747	0.829	K1	0.9345
Bcs1l	4	chr1:74588394-74588487	+	AD	0.5904	0.43773	0.15268	0.712	K2	1.4357
Bcs1l	5	chr1:74588488-74588604	+	AD	0.2621	0.35529	-0.093196	0.579	K2	1.4357
Bcs1l	6	chr1:74589486-74589878	+	CE	0.95992	0.96663	-0.0067166	0.533	K0	0
Bcs1l	7	chr1:74589960-74590099	+	CE	0.97039	0.9788	-0.0084102	0.606	K0	0
Bcs1l	8	chr1:74590265-74590459	+	CE	0.97917	0.97851	0.00065855	0.514	K0	0
Bcs1l	9	chr1:74590671-74590734	+	CE	0.94061	0.97051	-0.029893	0.713	K1	0.3784
Bcs1l	10	chr1:74590960-74591129	+	CE	0.97222	0.96218	0.010039	0.566	K0	0
Bcs1l	11	chr1:74591589-74591706	+	CE	0.97947	0.97519	0.0042834	0.555	K0	0
Bcs1l	12	chr1:74591822-74592124	+	TE	0.012075	0.057079	-0.045004	0.77	K2	1.1858
Bcs1l	13	chr1:74592125-74592189	+	TE	0.77702	0.74124	0.035778	0.612	K2	1.1858
Bcs1l	14	chr1:74592190-74592443	+	TE	0.22394	0.21696	0.0069831	0.516	K2	1.1858
Igsf8	6	chr1:172312491-172312593	+	CE	0.97593	0.96711	0.0088161	0.559	K0	0
Igsf8	7	chr1:172316151-172316528	+	CE	0.97903	0.97463	0.004406	0.562	K0	0
Igsf8	8	chr1:172317355-172317816	+	CE	0.98768	0.98431	0.0033758	0.549	K0	0
Igsf8	9	chr1:172318037-172318444	+	CE	0.9898	0.98628	0.0035216	0.53	K0	0
Igsf8	10	chr1:172318554-172318967	+	CE	0.98759	0.9846	0.0029956	0.535	K0	0
Igsf8	11	chr1:172319293-172319423	+	CE	0.98422	0.98076	0.0034563	0.515	K0	0
Nenf	2	chr1:191311460-191311520	-	CE	0.96163	0.96591	-0.0042828	0.543	K0	0
Nenf	3	chr1:191309919-191310022	-	CE	0.95809	0.94542	0.012666	0.555	K1	0.4643
Lancl1	1	chr1:67038866-67038872	-	TS	0.029591	0.029365	0.00022659	0.513	K2	0.9999
Lancl1	2	chr1:67038835-67038865	-	TS	0.51599	0.29943	0.21656	0.823	K2	0.9999
Lancl1	3	chr1:67038776-67038834	-	TS	0.48695	0.70171	-0.21476	0.828	K2	0.9999
Lancl1	4	chr1:67038772-67038775	-	AD	0.61422	0.67227	-0.058046	0.729	K2	1.2568
Lancl1	5	chr1:67038592-67038771	-	RI	0.58317	0.64431	-0.06114	0.739	K2	1.2568
Lancl1	6	chr1:67038495-67038591	-	CE	0.99436	0.99359	0.00077252	0.538	K0	0
Lancl1	7	chr1:67034124-67034241	-	CE	0.99498	0.99479	0.0001926	0.507	K0	0
Lancl1	8	chr1:67020858-67021065	-	CE	0.99503	0.99508	-5.4572e-05	0.515	K0	0
Lancl1	9	chr1:67009911-67010046	-	CE	0.90986	0.88802	0.021844	0.712	K2	0.5594
Lancl1	10	chr1:67009228-67009374	-	CE	0.99699	0.99415	0.0028307	0.685	K2	0.5418
Lancl1	11	chr1:67006868-67007050	-	CE	0.9956	0.99606	-0.00045444	0.552	K0	0
Lancl1	12	chr1:67004790-67004966	-	CE	0.9959	0.9961	-0.00020281	0.518	K0	0
Lancl1	13	chr1:67004339-67004411	-	CE	0.99557	0.99567	-9.9061e-05	0.515	K0	0
Lancl1	14	chr1:67003375-67003557	-	TE	0.92159	0.91627	0.0053191	0.564	K1	0.5236
Lancl1	15	chr1:67000517-67003374	-	TE	0.078564	0.083865	-0.005301	0.524	K1	0.5236
Map3k19	12	chr1:127821977-127824397	-	CE	0.89127	0.90717	-0.015902	0.533	K0	0
Map3k19	13	chr1:127820387-127820533	-	CE	0.91386	0.88306	0.030799	0.588	K0	0
Serpinb2	4	chr1:107519652-107519771	+	CE	0.87847	0.87216	0.006305	0.504	K0	0
Serpinb2	5	chr1:107522147-107522275	+	CE	0.87831	0.88674	-0.0084255	0.505	K0	0
Serpinb2	9	chr1:107524537-107525592	+	TE	0.93988	0.92968	0.010199	0.56	K1	0.0015
Serpinb2	10	chr1:107525593-107525598	+	TE	0.059699	0.067042	-0.0073435	0.578	K1	0.0015
Rgs16	2	chr1:153740863-153740973	+	CE	0.869	0.92402	-0.055014	0.644	K0	0
Rgs1	2	chr1:144248479-144248559	-	CE	0.95821	0.91923	0.038984	0.653	K0	0
Rgs1	3	chr1:144247906-144247967	-	CE	0.95946	0.91427	0.045194	0.684	K0	0
Rgs1	4	chr1:144246190-144246353	-	CE	0.96459	0.939	0.025592	0.655	K0	0
Dstyk	1	chr1:132417555-132417603	+	TS	0.051425	0.065475	-0.014049	0.561	K1	0.1339
Dstyk	2	chr1:132417604-132417870	+	TS	0.95054	0.93496	0.01558	0.537	K1	0.1339
Dstyk	3	chr1:132434099-132434487	+	CE	0.95731	0.91992	0.037391	0.7	K1	0.4632
Dstyk	4	chr1:132449312-132449975	+	CE	0.96392	0.95399	0.0099332	0.551	K0	0
Dstyk	5	chr1:132453087-132453319	+	CE	0.96207	0.9476	0.014462	0.592	K0	0
Dstyk	6	chr1:132454061-132454144	+	CE	0.96734	0.93585	0.03149	0.656	K0	0
Dstyk	7	chr1:132455232-132455408	+	CE	0.96364	0.93839	0.025249	0.612	K0	0
Dstyk	8	chr1:132455860-132455989	+	CE	0.95873	0.95503	0.0037031	0.503	K0	0
Dstyk	9	chr1:132456325-132456481	+	CE	0.96451	0.95524	0.0092662	0.529	K0	0
Dstyk	10	chr1:132456869-132457001	+	CE	0.9661	0.96861	-0.0025134	0.517	K0	0
Dstyk	11	chr1:132458317-132458430	+	CE	0.95864	0.96741	-0.0087687	0.588	K0	0
Dstyk	12	chr1:132459876-132459990	+	CE	0.95345	0.95106	0.0023902	0.515	K0	0
Dstyk	13	chr1:132462913-132463047	+	CE	0.96484	0.94499	0.019852	0.607	K0	0
Dstyk	14	chr1:132463324-132464092	+	TE	0.22883	0.29314	-0.064307	0.634	K1	0.9961
Dstyk	15	chr1:132464093-132466958	+	TE	0.77126	0.70732	0.063936	0.649	K1	0.9961
Cnst	2	chr1:179579338-179579768	+	CE	0.9922	0.98833	0.0038742	0.596	K0	0
Cnst	3	chr1:179592685-179592866	+	CE	0.99151	0.98996	0.0015512	0.513	K0	0
Cnst	4	chr1:179601702-179601732	+	CE	0.98743	0.98735	8.0678e-05	0.511	K0	0
Cnst	5	chr1:179604519-179604605	+	CE	0.98996	0.98923	0.00073764	0.536	K0	0
Cnst	6	chr1:179604953-179605067	+	CE	0.99158	0.99024	0.0013394	0.551	K0	0
Cnst	7	chr1:179606248-179606269	+	CE	0.96902	0.98423	-0.015215	0.598	K1	0.364
Cnst	8	chr1:179606437-179606533	+	CE	0.99286	0.99146	0.0013996	0.506	K0	0
Cnst	9	chr1:179609786-179610666	+	CE	0.99253	0.99119	0.0013395	0.53	K0	0
Cnst	10	chr1:179622767-179622902	+	CE	0.99133	0.98906	0.00227	0.554	K0	0
Mgat4a	4	chr1:37498600-37498740	-	CE	0.98952	0.99202	-0.0025006	0.584	K0	0
Mgat4a	5	chr1:37498573-37498599	-	AD	0.61671	0.60944	0.0072686	0.516	K1	0.9931
Mgat4a	7	chr1:37495873-37496013	-	CE	0.98632	0.99209	-0.0057702	0.653	K0	0
Mgat4a	8	chr1:37490260-37490393	-	CE	0.98763	0.99163	-0.0040013	0.578	K0	0
Mgat4a	9	chr1:37466537-37466583	-	CE	0.93527	0.93879	-0.0035184	0.554	K2	0.5053
Mgat4a	10	chr1:37464421-37464534	-	CE	0.9498	0.93951	0.010297	0.565	K2	0.5053
Mgat4a	11	chr1:37462892-37462967	-	CE	0.99005	0.99134	-0.0012911	0.545	K0	0
Mgat4a	12	chr1:37456590-37456704	-	CE	0.983	0.98504	-0.0020352	0.535	K0	0
Mgat4a	13	chr1:37454744-37454874	-	CE	0.98555	0.95254	0.03301	0.717	K1	0.4868
Mgat4a	14	chr1:37452522-37452629	-	CE	0.98752	0.98991	-0.0023859	0.549	K0	0
Mgat4a	15	chr1:37452231-37452424	-	CE	0.99052	0.99096	-0.00043959	0.525	K0	0
Mgat4a	16	chr1:37450329-37450407	-	CE	0.99286	0.99303	-0.00016442	0.505	K0	0
Mgat4a	17	chr1:37449096-37449162	-	CE	0.99254	0.99375	-0.0012029	0.563	K0	0
Mgat4a	18	chr1:37444807-37444919	-	CE	0.9922	0.99336	-0.0011644	0.566	K0	0
Mgat4a	19	chr1:37444320-37444685	-	TE	0.26066	0.29383	-0.033172	0.634	K2	0.9629
Mgat4a	20	chr1:37443716-37444319	-	TE	0.00039456	0.00030496	8.9596e-05	0.573	K2	0.9629
Mgat4a	21	chr1:37439340-37443715	-	TE	0.7396	0.70654	0.033055	0.669	K2	0.9629
Ctla4	1	chr1:60909025-60909170	+	TS	0.1766	0.12665	0.049948	0.647	K1	0.9191
Ctla4	2	chr1:60909171-60909279	+	TS	0.8253	0.87315	-0.047851	0.635	K1	0.9191
Ctla4	3	chr1:60912423-60912770	+	CE	0.95716	0.96389	-0.0067236	0.505	K1	0.4301
Ctla4	4	chr1:60913219-60913328	+	CE	0.98655	0.9746	0.011947	0.649	K0	0
Ctla4	5	chr1:60914613-60914769	+	TE	0.24916	0.076136	0.17302	0.984	K1	0.9294
Ctla4	6	chr1:60914770-60915832	+	TE	0.75091	0.92357	-0.17267	0.986	K1	0.9294
Atg9a	1	chr1:75191927-75192196	-	TS	0.012528	0.012684	-0.00015659	0.507	K2	0.4546
Atg9a	2	chr1:75191924-75191926	-	TS	0.90387	0.90869	-0.0048204	0.547	K2	0.4546
Atg9a	3	chr1:75191824-75191923	-	TS	0.096804	0.089848	0.0069561	0.555	K2	0.4546
Atg9a	4	chr1:75191487-75191823	-	AD	0.14869	0.17351	-0.02482	0.557	K2	1.4831
Atg9a	5	chr1:75190878-75190880	-	AA	0.48069	0.43582	0.044866	0.63	K2	1.4831
Atg9a	6	chr1:75190823-75190877	-	CE	0.98378	0.97607	0.0077127	0.612	K2	1.1615
Atg9a	7	chr1:75190303-75190434	-	CE	0.9776	0.98383	-0.0062203	0.61	K0	0
Atg9a	8	chr1:75190112-75190155	-	CE	0.9747	0.96111	0.013586	0.611	K1	0.2869
Atg9a	9	chr1:75189563-75189627	-	CE	0.97828	0.96818	0.010104	0.627	K1	0.2869
Atg9a	10	chr1:75187945-75188106	-	CE	0.97964	0.98554	-0.0058967	0.606	K0	0
Atg9a	11	chr1:75187685-75187826	-	CE	0.98361	0.98606	-0.0024489	0.57	K0	0
Atg9a	12	chr1:75186190-75186938	-	CE	0.98386	0.98656	-0.0026966	0.542	K0	0
Atg9a	13	chr1:75185951-75186104	-	CE	0.98335	0.98481	-0.0014571	0.514	K0	0
Atg9a	14	chr1:75185666-75185845	-	CE	0.98359	0.98505	-0.00146	0.521	K0	0
Atg9a	15	chr1:75185053-75185301	-	CE	0.98178	0.98399	-0.002213	0.554	K0	0
Atg9a	16	chr1:75184689-75184867	-	CE	0.98019	0.98169	-0.0014988	0.535	K0	0
Atg9a	17	chr1:75184456-75184573	-	CE	0.96106	0.9699	-0.0088476	0.559	K1	0.3137
Atg9a	18	chr1:75182894-75183116	-	CE	0.97117	0.97146	-0.00028494	0.52	K0	0
Atg9a	19	chr1:75182592-75182737	-	CE	0.9722	0.97364	-0.0014414	0.53	K0	0
Atg9a	20	chr1:75180866-75181931	-	TE	0.0040456	0.27626	-0.27222	0.58	K2	0.7962
Atg9a	21	chr1:75180865-75180865	-	TE	0.097042	0.098132	-0.0010905	0.56	K2	0.7962
Atg9a	22	chr1:75180860-75180864	-	TE	0.90233	0.62833	0.274	0.515	K2	0.7962
Nifk	1	chr1:118321839-118321853	+	TS	0.52532	0.46352	0.061803	0.54	K1	0.9998
Nifk	2	chr1:118321854-118321997	+	TS	0.47508	0.53627	-0.061192	0.597	K1	0.9998
Nifk	3	chr1:118323582-118323725	+	CE	0.99597	0.99485	0.0011186	0.534	K0	0
Nifk	4	chr1:118327625-118327733	+	CE	0.99575	0.99473	0.001017	0.543	K0	0
Nifk	5	chr1:118329353-118329564	+	CE	0.99646	0.99573	0.00072905	0.525	K0	0
Nifk	6	chr1:118330606-118330662	+	CE	0.99645	0.99602	0.00043848	0.508	K0	0
Nifk	7	chr1:118332344-118332478	+	CE	0.99646	0.99574	0.00071532	0.567	K0	0
Nifk	8	chr1:118332750-118332941	+	TE	0.22231	0.20803	0.014277	0.595	K1	0.8646
Nifk	9	chr1:118332942-118333822	+	TE	0.77767	0.79181	-0.014136	0.607	K1	0.8646
Cd244	2	chr1:171573681-171574004	+	CE	0.90478	0.92024	-0.015463	0.551	K0	0
Cd244	3	chr1:171574093-171574368	+	CE	0.90154	0.90753	-0.0059873	0.509	K0	0
Cd244	4	chr1:171577243-171577347	+	CE	0.90939	0.86827	0.041116	0.609	K0	0
Cd244	5	chr1:171577815-171577969	+	CE	0.89815	0.86744	0.030705	0.584	K0	0
Cd244	6	chr1:171579099-171579170	+	CE	0.87738	0.73665	0.14073	0.798	K1	0.7382
Cd244	7	chr1:171580758-171580820	+	CE	0.85749	0.86454	-0.0070498	0.525	K0	0
Gtf3c3	2	chr1:54437832-54437943	-	CE	0.99536	0.99445	0.00091571	0.526	K0	0
Gtf3c3	3	chr1:54434054-54434238	-	CE	0.99356	0.99283	0.00073177	0.56	K0	0
Gtf3c3	4	chr1:54430499-54430622	-	CE	0.99385	0.99196	0.0018937	0.547	K0	0
Gtf3c3	5	chr1:54428762-54428953	-	CE	0.99455	0.9925	0.0020509	0.538	K0	0
Gtf3c3	6	chr1:54427400-54427565	-	CE	0.99166	0.99032	0.0013421	0.531	K0	0
Gtf3c3	7	chr1:54424009-54424156	-	CE	0.99288	0.99241	0.00046831	0.516	K0	0
Gtf3c3	8	chr1:54423501-54423573	-	CE	0.97631	0.97142	0.0048879	0.577	K1	0.3462
Gtf3c3	9	chr1:54420396-54420499	-	CE	0.99113	0.99195	-0.000821	0.524	K0	0
Gtf3c3	10	chr1:54419383-54419554	-	CE	0.99185	0.99028	0.001571	0.546	K0	0
Gtf3c3	11	chr1:54417659-54417861	-	CE	0.98897	0.98595	0.0030177	0.573	K0	0
Gtf3c3	12	chr1:54416722-54416823	-	CE	0.99083	0.98926	0.0015723	0.542	K0	0
Gtf3c3	13	chr1:54415884-54416019	-	CE	0.99399	0.9924	0.00159	0.567	K0	0
Gtf3c3	14	chr1:54405837-54406074	-	CE	0.98431	0.98668	-0.0023742	0.501	K1	0.1877
Gtf3c3	15	chr1:54404980-54405170	-	CE	0.98323	0.98647	-0.0032387	0.517	K1	0.1877
Gtf3c3	16	chr1:54403511-54403635	-	CE	0.98381	0.98733	-0.0035131	0.541	K1	0.1877
Gtf3c3	17	chr1:54399129-54399281	-	CE	0.9931	0.99104	0.0020582	0.563	K0	0
Vcpip1	2	chr1:9736966-9737052	-	CE	0.97656	0.99523	-0.018674	0.887	K1	0.2325
Adipor1	1	chr1:134415378-134415455	+	TS	0.85467	0.8513	0.0033712	0.512	K1	0.6559
Adipor1	2	chr1:134415456-134415585	+	TS	0.14489	0.14807	-0.0031749	0.518	K1	0.6559
Adipor1	3	chr1:134415586-134415989	+	AD	0.22076	0.21802	0.0027428	0.501	K1	0.87
Adipor1	4	chr1:134422921-134423155	+	CE	0.99496	0.99464	0.0003182	0.501	K0	0
Adipor1	5	chr1:134423958-134424074	+	CE	0.99613	0.99629	-0.00016023	0.524	K0	0
Adipor1	6	chr1:134424751-134424922	+	CE	0.99663	0.99666	-2.4349e-05	0.512	K0	0
Adipor1	7	chr1:134425909-134426095	+	CE	0.99631	0.99633	-2.708e-05	0.507	K0	0
Adipor1	8	chr1:134428082-134428269	+	CE	0.99688	0.9969	-2.0033e-05	0.523	K0	0
Adipor1	9	chr1:134431057-134431250	+	CE	0.98981	0.96701	0.022796	0.854	K1	0.3102
Adipor1	10	chr1:134431530-134433348	+	TE	0.92834	0.92822	0.00012282	0.5	K1	0.3692
Adipor1	11	chr1:134433349-134433351	+	TE	0.071572	0.071747	-0.00017433	0.508	K1	0.3692
Dnajb2	1	chr1:75236406-75236464	+	TS	0.055415	0.057332	-0.001917	0.502	K2	0.0686
Dnajb2	2	chr1:75236465-75236468	+	TS	0.056298	0.05787	-0.0015725	0.51	K2	0.0686
Dnajb2	3	chr1:75236469-75236486	+	TS	0.94243	0.93448	0.0079561	0.51	K2	0.0686
Dnajb2	4	chr1:75236487-75236537	+	TS	0.059379	0.063961	-0.0045816	0.501	K2	0.0686
Dnajb2	7	chr1:75236590-75236851	+	RI	0.47614	0.42161	0.054535	0.583	K2	1.4848
Dnajb2	8	chr1:75236852-75236948	+	CE	0.95308	0.94696	0.0061184	0.515	K0	0
Dnajb2	9	chr1:75237455-75237564	+	CE	0.94584	0.9535	-0.0076654	0.539	K0	0
Dnajb2	10	chr1:75239280-75239333	+	CE	0.91566	0.90796	0.0077008	0.567	K1	0.4734
Dnajb2	11	chr1:75239508-75239630	+	CE	0.91441	0.92037	-0.0059531	0.575	K0	0
Dnajb2	12	chr1:75240892-75240984	+	CE	0.93006	0.92003	0.010028	0.502	K0	0
Dnajb2	13	chr1:75241171-75241273	+	CE	0.95434	0.95831	-0.0039688	0.529	K0	0
Dnajb2	14	chr1:75241409-75241479	+	CE	0.95451	0.96159	-0.0070836	0.504	K0	0
Dnajb2	15	chr1:75243458-75243661	+	CE	0.93117	0.92185	0.0093162	0.508	K0	0
Dnajb2	16	chr1:75243662-75244793	+	RI	0.61168	0.40334	0.20834	0.819	K1	0.9905
Dnajb2	17	chr1:75244794-75244804	+	TE	0.010208	0.01122	-0.001012	0.516	K2	0.1826
Dnajb2	18	chr1:75244805-75245688	+	TE	0.32908	0.010873	0.3182	0.613	K2	0.1826
Dnajb2	19	chr1:75245689-75245690	+	TE	0.65409	0.96417	-0.31008	0.553	K2	0.1826
Dnajb2	20	chr1:75245691-75245692	+	TE	0.027075	0.037059	-0.009984	0.66	K2	0.1826
Rgs2	1	chr1:144004033-144004161	-	TS	0.011478	0.011855	-0.00037684	0.51	K1	0
Rgs2	2	chr1:144004009-144004032	-	TS	0.98819	0.98761	0.00058276	0.538	K1	0
Rgs2	3	chr1:144002952-144003053	-	CE	0.98606	0.98611	-4.3246e-05	0.535	K0	0
Rgs2	4	chr1:144002780-144002841	-	CE	0.9903	0.98979	0.00051242	0.51	K0	0
Rgs2	5	chr1:144002116-144002282	-	CE	0.99326	0.99354	-0.00028564	0.552	K0	0
Glrx2	2	chr1:143739557-143739614	+	TS	0.024868	0.041383	-0.016515	0.636	K2	0.1307
Glrx2	3	chr1:143739615-143739617	+	TS	0.96243	0.94527	0.01716	0.625	K2	0.1307
Glrx2	4	chr1:143739618-143739684	+	TS	0.037708	0.053105	-0.015397	0.586	K2	0.1307
Glrx2	5	chr1:143739685-143739758	+	AD	0.83923	0.87118	-0.031949	0.679	K1	0.6805
Glrx2	6	chr1:143740375-143740479	+	AF	0.045985	0.025672	0.020313	0.681	K2	0.7807
Glrx2	7	chr1:143741648-143741711	+	CE	0.99132	0.99169	-0.00037416	0.517	K0	0
Glrx2	8	chr1:143745047-143745223	+	CE	0.99239	0.99375	-0.0013592	0.519	K0	0
Glrx2	10	chr1:143746508-143746776	+	TE	0.82731	0.82615	0.0011531	0.547	K2	0.9018
Glrx2	11	chr1:143746777-143749401	+	TE	0.023818	0.0054978	0.018321	0.851	K2	0.9018
Glrx2	12	chr1:143749402-143749676	+	TE	0.15068	0.17063	-0.019957	0.646	K2	0.9018
Dennd1b	1	chr1:138963435-138963708	+	TS	0.84709	0.86788	-0.020795	0.585	K1	0.6108
Dennd1b	2	chr1:138963709-138963885	+	TS	0.15717	0.13084	0.026332	0.636	K1	0.6108
Dennd1b	3	chr1:138966166-138966230	+	CE	0.98795	0.99174	-0.0037913	0.573	K0	0
Dennd1b	4	chr1:138967720-138967828	+	AF	0.017925	0.011287	0.0066374	0.618	K0	0
Dennd1b	5	chr1:139023105-139023148	+	CE	0.96767	0.98771	-0.020033	0.655	K2	0.6013
Dennd1b	6	chr1:139040000-139040049	+	CE	0.92291	0.95182	-0.028906	0.671	K2	0.6013
Dennd1b	7	chr1:139041924-139042043	+	CE	0.87253	0.95284	-0.080305	0.739	K4	2.5894
Dennd1b	8	chr1:139053346-139053415	+	CE	0.98991	0.9942	-0.0042915	0.674	K4	2.5894
Dennd1b	9	chr1:139054541-139054621	+	CE	0.99112	0.99576	-0.0046404	0.697	K3	1.6059
Dennd1b	10	chr1:139059067-139059126	+	CE	0.12006	0.082148	0.037917	0.772	K3	1.6059
Dennd1b	11	chr1:139060275-139060328	+	CE	0.9781	0.98369	-0.0055946	0.582	K3	1.6059
Dennd1b	12	chr1:139062861-139062971	+	CE	0.97864	0.98254	-0.0038976	0.576	K4	2.2083
Dennd1b	14	chr1:139081173-139081273	+	CE	0.81037	0.94336	-0.13299	0.862	K4	1.9358
Dennd1b	15	chr1:139085883-139085928	+	CE	0.8538	0.87542	-0.021623	0.623	K2	0.789
Dennd1b	16	chr1:139090454-139090555	+	CE	0.96133	0.97861	-0.017283	0.743	K2	0.789
Dennd1b	17	chr1:139101968-139102093	+	CE	0.9925	0.99257	-7.5221e-05	0.503	K0	0
Dennd1b	18	chr1:139110384-139110485	+	CE	0.99163	0.99223	-0.00060024	0.519	K0	0
Dennd1b	19	chr1:139133671-139133761	+	CE	0.99181	0.99227	-0.00045474	0.527	K0	0
Dennd1b	20	chr1:139139381-139139421	+	CE	0.9919	0.99173	0.00017073	0.505	K0	0
Dennd1b	21	chr1:139140452-139140520	+	CE	0.99153	0.99194	-0.00041356	0.522	K0	0
Dennd1b	22	chr1:139142834-139142890	+	CE	0.99254	0.99351	-0.00097455	0.533	K0	0
Dennd1b	23	chr1:139143893-139144000	+	CE	0.99093	0.99253	-0.0015995	0.557	K0	0
Dennd1b	24	chr1:139167671-139167756	+	CE	0.9905	0.99164	-0.0011349	0.504	K0	0
Dennd1b	25	chr1:139168832-139169048	+	CE	0.98942	0.99071	-0.0012891	0.541	K0	0
Nbeal1	2	chr1:60181463-60181754	+	CE	0.98528	0.98353	0.0017468	0.544	K0	0
Nbeal1	3	chr1:60194504-60194595	+	CE	0.98662	0.98231	0.0043132	0.577	K0	0
Nbeal1	4	chr1:60195015-60195176	+	CE	0.98672	0.98386	0.0028627	0.523	K0	0
Nbeal1	5	chr1:60200105-60200186	+	CE	0.99099	0.98862	0.0023755	0.546	K0	0
Nbeal1	6	chr1:60200864-60200991	+	CE	0.99257	0.99056	0.0020079	0.551	K0	0
Nbeal1	7	chr1:60206334-60206416	+	CE	0.99325	0.98871	0.0045475	0.588	K0	0
Nbeal1	8	chr1:60217196-60217281	+	CE	0.61137	0.44263	0.16874	0.927	K2	1.0162
Nbeal1	9	chr1:60222067-60222373	+	CE	0.98149	0.98552	-0.0040321	0.535	K2	1.0162
Nbeal1	10	chr1:60224625-60224731	+	CE	0.98951	0.98046	0.0090499	0.663	K0	0
Nbeal1	11	chr1:60230602-60230685	+	CE	0.98925	0.98222	0.0070338	0.631	K0	0
Nbeal1	12	chr1:60234797-60234895	+	CE	0.99072	0.98713	0.0035837	0.593	K0	0
Nbeal1	13	chr1:60234981-60235561	+	CE	0.9872	0.98535	0.0018561	0.536	K0	0
Nbeal1	14	chr1:60236371-60236503	+	CE	0.98455	0.98337	0.0011751	0.54	K0	0
Nbeal1	15	chr1:60237097-60237216	+	CE	0.98771	0.9814	0.0063053	0.597	K0	0
Nbeal1	16	chr1:60238572-60238875	+	CE	0.98918	0.98475	0.0044371	0.613	K0	0
Nbeal1	17	chr1:60242539-60242624	+	CE	0.99075	0.98965	0.0010995	0.569	K0	0
Nbeal1	18	chr1:60244794-60244883	+	CE	0.99468	0.98839	0.006285	0.686	K1	0.1259
Nbeal1	19	chr1:60247616-60247784	+	CE	0.99549	0.99493	0.00055922	0.593	K0	0
Nbeal1	20	chr1:60248363-60248496	+	CE	0.99379	0.99157	0.0022171	0.604	K0	0
Nbeal1	21	chr1:60251035-60251194	+	CE	0.99339	0.99097	0.002416	0.591	K0	0
Nbeal1	22	chr1:60251304-60251406	+	CE	0.98651	0.99142	-0.0049112	0.636	K1	0.1552
Nbeal1	23	chr1:60253352-60253508	+	CE	0.98586	0.98867	-0.0028116	0.561	K1	0.1552
Nbeal1	24	chr1:60254894-60255052	+	CE	0.99181	0.98915	0.0026669	0.561	K0	0
Nbeal1	25	chr1:60257430-60257589	+	CE	0.98918	0.98698	0.0022035	0.562	K0	0
Nbeal1	26	chr1:60258650-60258738	+	CE	0.98327	0.98558	-0.0023126	0.569	K1	0.1708
Nbeal1	27	chr1:60260233-60260793	+	CE	0.99403	0.98909	0.0049448	0.61	K0	0
Nbeal1	28	chr1:60261410-60261585	+	CE	0.99339	0.98927	0.004126	0.624	K0	0
Nbeal1	29	chr1:60264279-60264432	+	CE	0.99201	0.98875	0.0032641	0.583	K0	0
Nbeal1	30	chr1:60264882-60265010	+	CE	0.98921	0.98579	0.0034207	0.593	K0	0
Nbeal1	31	chr1:60267759-60268064	+	CE	0.98504	0.98227	0.0027719	0.527	K0	0
Nbeal1	32	chr1:60268383-60268532	+	CE	0.99097	0.98885	0.0021246	0.564	K0	0
Nbeal1	33	chr1:60270272-60270429	+	CE	0.99216	0.98793	0.004235	0.592	K0	0
Nbeal1	34	chr1:60272133-60272257	+	CE	0.99122	0.98684	0.0043743	0.575	K0	0
Nbeal1	35	chr1:60277125-60277251	+	CE	0.99443	0.99258	0.0018466	0.548	K0	0
Nbeal1	36	chr1:60277913-60278061	+	CE	0.9941	0.99251	0.0015943	0.543	K0	0
Nbeal1	37	chr1:60278667-60278800	+	CE	0.9911	0.98889	0.0022136	0.573	K0	0
Nbeal1	38	chr1:60279699-60279800	+	CE	0.98987	0.98652	0.0033515	0.591	K0	0
Nbeal1	39	chr1:60281247-60281342	+	CE	0.97683	0.98494	-0.0081062	0.636	K1	0.2341
Nbeal1	40	chr1:60281825-60281949	+	CE	0.99131	0.98725	0.0040591	0.591	K0	0
Nbeal1	41	chr1:60283983-60284123	+	CE	0.99028	0.98169	0.0085856	0.673	K0	0
Nbeal1	42	chr1:60287311-60287441	+	CE	0.98936	0.97036	0.019	0.677	K0	0
Nbeal1	43	chr1:60289915-60290024	+	CE	0.99047	0.98059	0.0098845	0.677	K0	0
Nbeal1	44	chr1:60291834-60291951	+	CE	0.99104	0.98407	0.0069737	0.649	K0	0
Nbeal1	45	chr1:60292867-60292964	+	CE	0.99103	0.98469	0.0063415	0.649	K0	0
Nbeal1	46	chr1:60295879-60295995	+	CE	0.98951	0.98247	0.0070402	0.614	K0	0
Nbeal1	47	chr1:60305275-60305364	+	CE	0.98634	0.97535	0.010986	0.597	K0	0
Nbeal1	48	chr1:60310204-60310313	+	CE	0.98881	0.9815	0.0073018	0.61	K0	0
Nbeal1	49	chr1:60310927-60311099	+	CE	0.98974	0.98637	0.0033736	0.584	K0	0
Nbeal1	50	chr1:60312151-60312245	+	CE	0.98787	0.98435	0.0035171	0.581	K0	0
Nbeal1	51	chr1:60319317-60319433	+	CE	0.98868	0.97982	0.0088574	0.655	K0	0
Nbeal1	52	chr1:60319671-60319832	+	CE	0.98619	0.97719	0.0090007	0.611	K0	0
Nbeal1	53	chr1:60328060-60328208	+	CE	0.98241	0.97534	0.0070784	0.631	K0	0
Nbeal1	54	chr1:60329327-60329462	+	CE	0.98927	0.98674	0.0025303	0.554	K0	0
Iars2	2	chr1:185327620-185327742	-	CE	0.99469	0.99436	0.00033544	0.52	K0	0
Iars2	3	chr1:185325503-185325662	-	CE	0.99565	0.99593	-0.00028446	0.507	K0	0
Iars2	4	chr1:185323667-185323815	-	CE	0.99405	0.99499	-0.00094084	0.516	K0	0
Iars2	5	chr1:185323186-185323235	-	CE	0.99359	0.99301	0.00057367	0.527	K0	0
Iars2	6	chr1:185322993-185323102	-	CE	0.99452	0.9944	0.0001202	0.51	K0	0
Iars2	7	chr1:185322821-185322911	-	CE	0.99431	0.99506	-0.00074819	0.518	K0	0
Iars2	8	chr1:185322400-185322515	-	CE	0.99334	0.99384	-0.0004933	0.506	K0	0
Iars2	9	chr1:185320837-185321006	-	CE	0.99317	0.99285	0.00032491	0.511	K0	0
Iars2	10	chr1:185318564-185318654	-	CE	0.99562	0.99576	-0.00013802	0.503	K0	0
Iars2	11	chr1:185317807-185317958	-	CE	0.99548	0.99556	-7.7859e-05	0.52	K0	0
Iars2	12	chr1:185315894-185316054	-	CE	0.99344	0.99352	-7.4556e-05	0.522	K0	0
Iars2	13	chr1:185311846-185312527	-	AL	0.012045	0.030138	-0.018093	0.738	K2	0.5626
Iars2	14	chr1:185303299-185303401	-	CE	0.97217	0.96455	0.0076113	0.655	K1	0.3528
Iars2	15	chr1:185302708-185302801	-	CE	0.97194	0.9645	0.0074381	0.668	K1	0.3528
Iars2	16	chr1:185297473-185297581	-	CE	0.99437	0.99484	-0.0004676	0.501	K0	0
Iars2	17	chr1:185296411-185296513	-	CE	0.99485	0.99452	0.00032961	0.529	K0	0
Iars2	18	chr1:185295555-185295680	-	CE	0.9941	0.99403	6.7962e-05	0.502	K0	0
Iars2	20	chr1:185294744-185294875	-	CE	0.99286	0.99362	-0.00076443	0.502	K0	0
Iars2	21	chr1:185291319-185291425	-	CE	0.99177	0.99273	-0.0009563	0.517	K0	0
Iars2	22	chr1:185290486-185290631	-	CE	0.99256	0.99216	0.00039772	0.53	K0	0
Iars2	23	chr1:185289353-185289543	-	CE	0.99295	0.99322	-0.00027593	0.506	K0	0
Iars2	24	chr1:185288040-185288184	-	CE	0.99309	0.9941	-0.0010106	0.506	K0	0
Stk16	2	chr1:75211240-75211414	+	CE	0.99664	0.99663	1.0483e-05	0.51	K0	0
Stk16	3	chr1:75211925-75212144	+	CE	0.9908	0.99708	-0.0062786	0.692	K1	0.1413
Stk16	4	chr1:75212600-75212733	+	CE	0.98968	0.99622	-0.006542	0.711	K1	0.146
Stk16	5	chr1:75212886-75213006	+	CE	0.99383	0.99378	5.0798e-05	0.509	K0	0
Stk16	6	chr1:75213133-75213228	+	CE	0.84268	0.82684	0.015839	0.556	K1	0.7724
Stk16	7	chr1:75213576-75213697	+	CE	0.9952	0.99478	0.0004162	0.537	K0	0
Fam135a	27	chr1:24011681-24012497	-	TE	0.91665	0.11294	0.80371	1	K2	0.9991
Fam135a	28	chr1:24011591-24011680	-	TE	0.084517	0.50987	-0.42535	0.992	K2	0.9991
Fam135a	29	chr1:24011245-24011590	-	TE	0.086271	0.48649	-0.40022	0.989	K2	0.9991
Aldh9a1	2	chr1:167352520-167352665	+	CE	0.99336	0.99285	0.0005069	0.547	K0	0
Aldh9a1	3	chr1:167354427-167354556	+	CE	0.99247	0.99151	0.00095295	0.533	K0	0
Aldh9a1	4	chr1:167355672-167355806	+	CE	0.96637	0.99019	-0.023812	0.767	K1	0.3774
Aldh9a1	5	chr1:167356530-167356726	+	CE	0.99476	0.99381	0.00094722	0.565	K0	0
Aldh9a1	6	chr1:167357310-167357450	+	CE	0.99543	0.99493	0.00050057	0.508	K0	0
Aldh9a1	7	chr1:167361403-167361591	+	CE	0.9949	0.99443	0.00047058	0.501	K0	0
Aldh9a1	8	chr1:167361804-167361891	+	CE	0.99574	0.99571	2.2189e-05	0.51	K0	0
Aldh9a1	9	chr1:167364508-167364649	+	CE	0.9953	0.99552	-0.00022035	0.527	K0	0
Aldh9a1	10	chr1:167365775-167365887	+	CE	0.99475	0.99476	-1.2573e-05	0.507	K0	0
Kctd3	2	chr1:189001905-189001958	-	CE	0.9655	0.97074	-0.0052393	0.564	K0	0
Kctd3	3	chr1:189001343-189001388	-	CE	0.96988	0.97598	-0.0060949	0.56	K0	0
Kctd3	4	chr1:189000253-189000326	-	CE	0.97494	0.9793	-0.0043631	0.544	K0	0
Kctd3	5	chr1:188997277-188997335	-	CE	0.97951	0.98233	-0.0028159	0.535	K0	0
Kctd3	6	chr1:188996962-188997042	-	CE	0.98251	0.98449	-0.0019767	0.562	K0	0
Kctd3	7	chr1:188996400-188996540	-	CE	0.98654	0.98392	0.0026174	0.527	K0	0
Kctd3	8	chr1:188995742-188995832	-	CE	0.98614	0.98463	0.0015183	0.514	K0	0
Kctd3	9	chr1:188992563-188992753	-	CE	0.95265	0.93546	0.017198	0.575	K2	0.6705
Kctd3	10	chr1:188987516-188987631	-	CE	0.93479	0.93874	-0.0039431	0.526	K3	1.2363
Kctd3	11	chr1:188983207-188983294	-	CE	0.9593	0.89706	0.062236	0.76	K2	1.2363
Kctd3	12	chr1:188983010-188983126	-	CE	0.96892	0.94173	0.027188	0.683	K2	0.8417
Kctd3	13	chr1:188981225-188981395	-	CE	0.98452	0.98187	0.0026471	0.504	K0	0
Kctd3	14	chr1:188978497-188978652	-	CE	0.9815	0.9839	-0.0023958	0.517	K0	0
Kctd3	15	chr1:188976611-188976707	-	CE	0.96493	0.95675	0.0081754	0.537	K1	0.3947
Kctd3	16	chr1:188974287-188974471	-	CE	0.97873	0.9773	0.0014251	0.505	K0	0
Kctd3	17	chr1:188974066-188974204	-	CE	0.97816	0.97876	-0.00060293	0.509	K0	0
Cnot9	2	chr1:74517070-74517249	+	CE	0.99512	0.99299	0.0021249	0.605	K0	0
Cnot9	3	chr1:74518901-74519016	+	CE	0.99527	0.9933	0.0019633	0.575	K0	0
Cnot9	4	chr1:74522318-74522427	+	CE	0.99485	0.99352	0.0013232	0.566	K0	0
Cnot9	5	chr1:74523504-74523613	+	CE	0.99629	0.99485	0.0014402	0.582	K0	0
Cnot9	6	chr1:74526992-74527090	+	CE	0.99723	0.99615	0.0010834	0.51	K0	0
Cnot9	7	chr1:74527592-74527683	+	CE	0.99688	0.99596	0.00091874	0.544	K0	0
Hjurp	1	chr1:88277558-88277633	-	TS	0.002417	0.0025587	-0.0001417	0.525	K2	0.9917
Hjurp	2	chr1:88277507-88277557	-	TS	0.85697	0.59764	0.25933	1	K2	0.9917
Hjurp	3	chr1:88277374-88277506	-	TS	0.14208	0.40188	-0.2598	1	K2	0.9917
Hjurp	4	chr1:88277219-88277285	-	CE	0.99875	0.99851	0.00024208	0.542	K0	0
Hjurp	5	chr1:88275042-88275097	-	CE	0.99827	0.99792	0.00035327	0.563	K0	0
Hjurp	6	chr1:88275028-88275041	-	AD	0.091959	0.087732	0.0042266	0.553	K2	1.049
Hjurp	7	chr1:88272729-88272765	-	CE	0.89944	0.84519	0.054255	0.888	K2	1.049
Hjurp	8	chr1:88270202-88270299	-	CE	0.90085	0.84755	0.053293	0.9	K2	1.049
Hjurp	9	chr1:88269321-88269413	-	CE	0.90309	0.85073	0.052365	0.897	K2	1.4725
Hjurp	10	chr1:88267948-88268026	-	CE	0.99869	0.99851	0.00018372	0.57	K0	0
Hjurp	11	chr1:88264978-88266658	-	TE	8.1848e-05	9.3453e-05	-1.1604e-05	0.509	K2	0.9561
Hjurp	12	chr1:88264828-88264977	-	TE	0.33294	0.31347	0.01947	0.693	K2	0.9561
Hjurp	13	chr1:88262471-88264827	-	TE	0.66685	0.68649	-0.019636	0.704	K2	0.9561
Sox13	3	chr1:133393219-133393270	-	TS	0.2339	0.24475	-0.010846	0.511	K1	0.862
Sox13	4	chr1:133393073-133393218	-	TS	0.77599	0.75364	0.022348	0.505	K1	0.862
Sox13	5	chr1:133390729-133390840	-	CE	0.93778	0.90126	0.036517	0.614	K0	0
Sox13	6	chr1:133390559-133390645	-	CE	0.92752	0.92885	-0.001329	0.506	K0	0
Sox13	7	chr1:133389324-133389496	-	CE	0.9295	0.92645	0.0030502	0.513	K0	0
Sox13	8	chr1:133388929-133388997	-	CE	0.90139	0.91418	-0.012786	0.533	K0	0
Sox13	10	chr1:133388449-133388560	-	CE	0.87392	0.90442	-0.030507	0.573	K0	0
Sox13	11	chr1:133387084-133387166	-	CE	0.87071	0.89506	-0.024351	0.553	K0	0
Sox13	13	chr1:133386185-133386294	-	CE	0.90387	0.89437	0.0094928	0.548	K0	0
Sox13	14	chr1:133385994-133386090	-	CE	0.90867	0.91794	-0.0092669	0.503	K0	0
Sox13	15	chr1:133385466-133385609	-	CE	0.89439	0.90997	-0.015574	0.546	K0	0
Sox13	16	chr1:133384457-133384673	-	CE	0.90076	0.90262	-0.0018558	0.501	K0	0
Sox13	18	chr1:133383651-133383924	-	TE	0.46035	0.38017	0.080186	0.649	K1	0.9964
Sox13	19	chr1:133382303-133383650	-	TE	0.54029	0.61911	-0.078825	0.624	K1	0.9964
Kcnq5	1	chr1:21961582-21961942	-	TS	0.24653	0.42016	-0.17363	0.644	K1	0.946
Kcnq5	2	chr1:21961181-21961581	-	TS	0.75509	0.5729	0.1822	0.643	K1	0.946
Kcnq5	3	chr1:21593524-21593614	-	CE	0.96234	0.91329	0.049054	0.701	K0	0
Kcnq5	4	chr1:21535061-21535187	-	CE	0.97679	0.94214	0.034653	0.659	K0	0
Kcnq5	5	chr1:21505684-21505859	-	CE	0.97649	0.9515	0.024994	0.626	K0	0
Kcnq5	6	chr1:21505300-21505425	-	CE	0.96249	0.95299	0.0094996	0.575	K0	0
Kcnq5	7	chr1:21487223-21487333	-	CE	0.91687	0.95312	-0.036256	0.615	K1	0.6058
Kcnq5	8	chr1:21479374-21479469	-	CE	0.95112	0.91563	0.035486	0.639	K0	0
Kcnq5	9	chr1:21469470-21469564	-	CE	0.87411	0.92594	-0.051831	0.674	K1	0.6336
Kcnq5	10	chr1:21466383-21466409	-	CE	0.064623	0.096158	-0.031535	0.609	K0	0
Kcnq5	11	chr1:21461551-21461607	-	CE	0.063849	0.097182	-0.033333	0.575	K0	0
Kcnq5	12	chr1:21457404-21457624	-	CE	0.96928	0.93365	0.03563	0.682	K0	0
Kcnq5	13	chr1:21424049-21424157	-	CE	0.9654	0.94592	0.019486	0.598	K0	0
Kcnq5	14	chr1:21405793-21405924	-	CE	0.96173	0.94175	0.019977	0.626	K0	0
Kcnq5	15	chr1:21404932-21405058	-	CE	0.95657	0.94002	0.016556	0.561	K0	0
Kcnq5	16	chr1:21402163-21403125	-	TE	0.15699	0.028627	0.12836	0.898	K2	1.3266
Kcnq5	17	chr1:21398408-21402162	-	TE	0.48018	0.81116	-0.33098	0.745	K2	1.3266
Kcnq5	18	chr1:21398403-21398407	-	TE	0.36487	0.1659	0.19896	0.629	K2	1.3266
Tsn	2	chr1:118309773-118309866	-	CE	0.99772	0.99742	0.00030376	0.523	K0	0
Tsn	3	chr1:118308745-118308841	-	CE	0.9979	0.99737	0.00053188	0.525	K0	0
Tsn	4	chr1:118305200-118305315	-	CE	0.99759	0.99706	0.0005377	0.542	K0	0
Tsn	5	chr1:118304691-118304770	-	CE	0.99704	0.9965	0.00053923	0.548	K0	0
Actr1b	2	chr1:36708191-36708255	-	CE	0.98178	0.97743	0.0043543	0.58	K1	0.2034
Actr1b	3	chr1:36706870-36706945	-	CE	0.99673	0.99648	0.00025073	0.504	K0	0
Actr1b	4	chr1:36702475-36702600	-	CE	0.99676	0.99647	0.00029351	0.51	K0	0
Actr1b	5	chr1:36702059-36702183	-	CE	0.99565	0.99562	3.7412e-05	0.537	K0	0
Actr1b	6	chr1:36701685-36701901	-	CE	0.99495	0.99077	0.0041788	0.595	K1	0.1067
Actr1b	7	chr1:36701421-36701513	-	CE	0.99524	0.99495	0.00029395	0.512	K0	0
Actr1b	8	chr1:36701134-36701308	-	CE	0.99575	0.99564	0.00010753	0.511	K0	0
Actr1b	9	chr1:36700536-36700597	-	CE	0.99631	0.99612	0.00019811	0.523	K0	0
Actr1b	10	chr1:36700337-36700377	-	CE	0.99508	0.99435	0.00073247	0.512	K0	0
Il1rl2	1	chr1:40324627-40324689	+	TS	0.064313	0.047569	0.016744	0.576	K1	0
Il1rl2	2	chr1:40324690-40324749	+	TS	0.93382	0.95275	-0.018931	0.621	K1	0
Il1rl2	3	chr1:40324750-40324819	+	AD	0.53504	0.6894	-0.15436	0.789	K2	1.423
Il1rl2	4	chr1:40326489-40326558	+	CE	0.94517	0.86909	0.076081	0.795	K2	1.423
Il1rl2	5	chr1:40327372-40327606	+	CE	0.95941	0.97416	-0.014756	0.592	K0	0
Il1rl2	6	chr1:40328971-40329169	+	CE	0.96339	0.97409	-0.010701	0.573	K0	0
Il1rl2	7	chr1:40343028-40343190	+	CE	0.91104	0.93938	-0.028337	0.572	K1	0.5511
Il1rl2	8	chr1:40345806-40345877	+	CE	0.94113	0.9351	0.0060337	0.53	K0	0
Il1rl2	9	chr1:40350936-40351065	+	CE	0.74933	0.83566	-0.086322	0.713	K1	0.8823
Il1rl2	10	chr1:40351762-40351898	+	CE	0.95194	0.92551	0.026429	0.615	K0	0
Il1rl2	11	chr1:40356819-40356962	+	CE	0.94236	0.95867	-0.01631	0.584	K0	0
Il1rl2	12	chr1:40363192-40363353	+	CE	0.91316	0.96563	-0.052471	0.725	K1	0.4043
Il1rl2	13	chr1:40365027-40365471	+	TE	0.1461	0.2682	-0.1221	0.549	K1	0.9279
Il1rl2	14	chr1:40365472-40367562	+	TE	0.85394	0.73223	0.12171	0.589	K1	0.9279
Hes6	2	chr1:91412893-91412979	-	CE	0.99586	0.99579	6.4948e-05	0.506	K0	0
Hes6	3	chr1:91412721-91412802	-	CE	0.98867	0.98937	-0.00070652	0.531	K0	0
Ikbke	2	chr1:131278699-131278787	-	CE	0.96474	0.96653	-0.0017918	0.518	K1	0.2741
Ikbke	3	chr1:131276894-131276951	-	AF	0.025284	0.048944	-0.02366	0.84	K2	0.4893
Ikbke	4	chr1:131276468-131276578	-	CE	0.99632	0.99699	-0.00067555	0.558	K0	0
Ikbke	5	chr1:131275779-131275847	-	CE	0.9959	0.99676	-0.00085687	0.581	K0	0
Ikbke	6	chr1:131275707-131275778	-	AD	0.99107	0.99554	-0.0044635	0.681	K1	0.0899
Ikbke	7	chr1:131275150-131275279	-	CE	0.99334	0.99443	-0.0010891	0.544	K0	0
Ikbke	8	chr1:131273641-131273822	-	CE	0.99284	0.99477	-0.0019317	0.588	K0	0
Ikbke	9	chr1:131273371-131273531	-	CE	0.98537	0.97084	0.014533	0.606	K2	0.4748
Ikbke	10	chr1:131272108-131272218	-	CE	0.99356	0.97309	0.020471	0.821	K2	0.4748
Ikbke	11	chr1:131271763-131271942	-	CE	0.99512	0.9962	-0.0010747	0.582	K0	0
Ikbke	12	chr1:131270887-131271083	-	CE	0.99424	0.99315	0.0010887	0.544	K2	0.1406
Ikbke	13	chr1:131270186-131270250	-	CE	0.98053	0.97979	0.00074488	0.574	K2	0.2187
Ikbke	14	chr1:131270018-131270109	-	CE	0.99142	0.9935	-0.0020862	0.606	K0	0
Ikbke	15	chr1:131269801-131269887	-	CE	0.9922	0.99405	-0.001847	0.595	K0	0
Ikbke	16	chr1:131265875-131265950	-	CE	0.99281	0.99431	-0.0015067	0.567	K0	0
Ikbke	17	chr1:131265639-131265754	-	CE	0.99207	0.99406	-0.0019828	0.576	K0	0
Ikbke	18	chr1:131263273-131263349	-	CE	0.99074	0.99412	-0.0033831	0.609	K0	0
Ikbke	19	chr1:131260006-131260045	-	CE	0.80944	0.71234	0.097101	0.87	K1	0.8717
Ikbke	20	chr1:131259182-131259283	-	CE	0.99366	0.9946	-0.00093823	0.53	K0	0
Ikbke	21	chr1:131257901-131257997	-	CE	0.97706	0.98101	-0.0039517	0.672	K1	0.2335
Ikbke	22	chr1:131257117-131257223	-	CE	0.99243	0.99347	-0.0010372	0.53	K0	0
Ikbke	23	chr1:131256887-131256958	-	CE	0.99329	0.99484	-0.0015474	0.576	K0	0
Ikbke	24	chr1:131254602-131255338	-	TE	0.002424	0.0016051	0.00081893	0.63	K1	0.0068
Ikbke	25	chr1:131254597-131254601	-	TE	0.99758	0.99841	-0.00083397	0.598	K1	0.0068
BC026585	4	chr1:157461953-157462049	+	CE	0.88818	0.92942	-0.041233	0.634	K0	0
BC026585	5	chr1:157464409-157464467	+	CE	0.88076	0.87391	0.0068481	0.546	K0	0
BC026585	11	chr1:157488443-157488628	+	TE	0.044049	0.20942	-0.16537	0.87	K1	0.9506
BC026585	12	chr1:157488629-157489060	+	TE	0.95791	0.78837	0.16954	0.892	K1	0.9506
Gm17767	5	chr1:51509505-51510044	-	TE	0.46431	0.28303	0.18128	0.697	K1	1
Gm17767	6	chr1:51507086-51509504	-	TE	0.53862	0.7184	-0.17977	0.652	K1	1
Cnot11	4	chr1:39537416-39537580	+	CE	0.98862	0.98926	-0.00064199	0.503	K0	0
Cnot11	5	chr1:39538271-39538423	+	CE	0.99342	0.99258	0.00084033	0.547	K0	0
Cnot11	6	chr1:39539873-39540075	+	CE	0.99458	0.99332	0.0012586	0.533	K0	0
Cnot11	7	chr1:39542400-39542602	+	CE	0.99508	0.99415	0.0009317	0.502	K0	0
Cnot11	8	chr1:39544892-39544988	+	CE	0.99582	0.99496	0.00085598	0.548	K0	0
Cnot11	9	chr1:39545069-39546873	+	TE	0.99891	0.99878	0.00012873	0.543	K1	0
Cnot11	10	chr1:39546874-39546889	+	TE	0.0010735	0.0012583	-0.00018485	0.524	K1	0
Xrcc5	2	chr1:72310435-72310548	+	CE	0.99502	0.99486	0.0001653	0.533	K0	0
Xrcc5	3	chr1:72312408-72312591	+	CE	0.94672	0.95418	-0.0074537	0.627	K2	0.3873
Xrcc5	4	chr1:72314154-72314202	+	CE	0.94386	0.95195	-0.0080921	0.614	K2	0.3873
Xrcc5	5	chr1:72315459-72315581	+	CE	0.97584	0.97986	-0.0040183	0.556	K2	0.3873
Xrcc5	6	chr1:72318999-72319190	+	CE	0.99116	0.99134	-0.00017585	0.516	K0	0
Xrcc5	7	chr1:72325074-72325188	+	CE	0.99389	0.98917	0.0047236	0.658	K1	0.1048
Xrcc5	8	chr1:72326216-72326354	+	CE	0.99423	0.98944	0.004791	0.667	K1	0.1048
Xrcc5	9	chr1:72329926-72330038	+	CE	0.99327	0.99351	-0.00024817	0.504	K0	0
Xrcc5	10	chr1:72334636-72334698	+	CE	0.98925	0.9918	-0.0025588	0.546	K0	0
Xrcc5	11	chr1:72338960-72339097	+	CE	0.98549	0.98724	-0.0017513	0.511	K0	0
Xrcc5	12	chr1:72339989-72340079	+	CE	0.9898	0.98919	0.00060704	0.52	K0	0
Xrcc5	13	chr1:72343009-72343142	+	CE	0.99184	0.99038	0.0014567	0.585	K0	0
Xrcc5	14	chr1:72346228-72346424	+	CE	0.99143	0.99086	0.00057399	0.556	K0	0
Xrcc5	15	chr1:72354243-72354336	+	CE	0.99022	0.98848	0.0017417	0.535	K0	0
Xrcc5	16	chr1:72356817-72356886	+	CE	0.99026	0.98745	0.0028033	0.525	K0	0
Xrcc5	17	chr1:72381619-72381728	+	CE	0.99017	0.98994	0.0002275	0.515	K0	0
Xrcc5	18	chr1:72383358-72383454	+	CE	0.99097	0.99044	0.00053579	0.528	K0	0
Xrcc5	19	chr1:72383702-72383769	+	CE	0.99191	0.99135	0.00056292	0.518	K0	0
Xrcc5	20	chr1:72393896-72393967	+	CE	0.99131	0.99042	0.00088955	0.573	K0	0
Hhat	1	chr1:192771214-192771223	-	TS	0.066961	0.098419	-0.031458	0.616	K1	0
Hhat	2	chr1:192770980-192771213	-	TS	0.93262	0.90873	0.023886	0.594	K1	0
Hhat	3	chr1:192759671-192759800	-	CE	0.65196	0.75304	-0.10108	0.707	K1	0.997
Hhat	4	chr1:192748881-192748948	-	CE	0.93139	0.9419	-0.010509	0.588	K0	0
Hhat	5	chr1:192741510-192741623	-	CE	0.93465	0.93918	-0.0045312	0.503	K0	0
Hhat	6	chr1:192727284-192727478	-	CE	0.92583	0.91081	0.015012	0.535	K0	0
Hhat	7	chr1:192726120-192726353	-	CE	0.92009	0.91324	0.0068497	0.51	K0	0
Hhat	8	chr1:192716957-192717128	-	CE	0.92139	0.89627	0.025118	0.552	K0	0
Hhat	9	chr1:192693799-192693949	-	CE	0.92122	0.88192	0.039301	0.607	K0	0
Hhat	10	chr1:192661456-192661491	-	CE	0.87498	0.87688	-0.001903	0.505	K0	0
Hhat	12	chr1:192552939-192553083	-	CE	0.891	0.88204	0.0089575	0.52	K0	0
Hhat	13	chr1:192512828-192513975	-	AL	0.87793	0.856	0.021927	0.56	K0	0
Tagln2	2	chr1:172501252-172501314	+	AF	0.0046468	0.012955	-0.0083081	0.779	K1	0.1313
Tagln2	3	chr1:172505120-172505327	+	CE	0.9973	0.99619	0.0011127	0.593	K0	0
Tagln2	4	chr1:172505761-172505935	+	CE	0.99722	0.99648	0.00074172	0.55	K0	0
Tagln2	5	chr1:172506186-172506288	+	CE	0.9971	0.99644	0.00066	0.605	K0	0
Tagln2	6	chr1:172506567-172506733	+	TE	0.0082365	0.0076819	0.00055465	0.501	K1	0.1486
Tagln2	7	chr1:172506734-172507380	+	TE	0.99177	0.99225	-0.00048366	0.511	K1	0.1486
Fh1	2	chr1:175619051-175619185	-	CE	0.99585	0.99469	0.0011534	0.563	K0	0
Fh1	3	chr1:175616529-175616639	-	CE	0.99639	0.99564	0.00075445	0.558	K0	0
Fh1	4	chr1:175614737-175614913	-	CE	0.99565	0.99464	0.0010155	0.54	K0	0
Fh1	5	chr1:175612147-175612329	-	CE	0.99561	0.99441	0.0011984	0.537	K0	0
Fh1	6	chr1:175609637-175609802	-	CE	0.99592	0.99568	0.0002421	0.528	K0	0
Fh1	7	chr1:175607817-175608020	-	CE	0.99742	0.99761	-0.00018205	0.513	K0	0
Fh1	8	chr1:175606055-175606182	-	CE	0.99763	0.99759	3.521e-05	0.539	K0	0
Fh1	9	chr1:175603938-175604091	-	CE	0.99757	0.99701	0.00056738	0.541	K0	0
Fcrla	3	chr1:170922222-170922404	-	CE	0.86775	0.93177	-0.064018	0.69	K0	0
Fcrla	4	chr1:170921518-170921784	-	CE	0.87337	0.92436	-0.050998	0.659	K0	0
Fcrla	5	chr1:170920834-170921118	-	CE	0.86458	0.94686	-0.082284	0.704	K0	0
Fcrla	6	chr1:170917881-170918394	-	TE	0.40454	0.32057	0.083971	0.558	K1	0.987
Fcrla	7	chr1:170917576-170917880	-	TE	0.5938	0.68166	-0.087863	0.587	K1	0.987
Dnpep	1	chr1:75317638-75317659	-	TS	0.50329	0.90111	-0.39782	0.583	K1	0
Dnpep	2	chr1:75317335-75317637	-	TS	0.4956	0.098179	0.39742	0.575	K1	0
Dnpep	3	chr1:75316994-75317149	-	TS	0.017817	0.022893	-0.0050765	0.545	K2	0.4859
Dnpep	4	chr1:75316946-75316993	-	TS	0.91891	0.90514	0.013778	0.566	K2	0.4859
Dnpep	5	chr1:75316891-75316945	-	TS	0.08024	0.093209	-0.012969	0.557	K2	0.4859
Dnpep	6	chr1:75316804-75316890	-	RI	0.22784	0.26411	-0.036276	0.632	K2	1.5782
Dnpep	7	chr1:75316710-75316803	-	CE	0.99166	0.99053	0.0011295	0.523	K0	0
Dnpep	8	chr1:75316541-75316629	-	CE	0.99174	0.99142	0.00032417	0.518	K0	0
Dnpep	9	chr1:75316330-75316443	-	CE	0.9841	0.99068	-0.0065842	0.701	K1	0.0999
Dnpep	10	chr1:75315945-75316070	-	CE	0.99281	0.99131	0.0015013	0.538	K0	0
Dnpep	11	chr1:75315619-75315749	-	CE	0.99315	0.99155	0.0016032	0.525	K0	0
Dnpep	12	chr1:75315345-75315420	-	CE	0.99298	0.99148	0.001501	0.553	K0	0
Dnpep	13	chr1:75315130-75315237	-	CE	0.99291	0.99134	0.001564	0.555	K0	0
Dnpep	14	chr1:75314364-75314441	-	CE	0.99218	0.99034	0.0018389	0.546	K0	0
Dnpep	15	chr1:75313426-75313509	-	CE	0.99293	0.98656	0.0063692	0.651	K1	0.1085
Dnpep	16	chr1:75312405-75312565	-	CE	0.99373	0.99283	0.00089528	0.526	K0	0
Dnpep	17	chr1:75311992-75312031	-	CE	0.99333	0.99104	0.0022966	0.563	K0	0
Dnpep	18	chr1:75311792-75311893	-	CE	0.99207	0.99032	0.0017522	0.542	K0	0
Dnpep	19	chr1:75309299-75309466	-	CE	0.99218	0.99256	-0.00038019	0.513	K0	0
Dnpep	20	chr1:75308710-75309298	-	RI	0.20773	0.16411	0.043627	0.644	K1	0.9128
Dnpep	21	chr1:75308565-75308709	-	TE	0.97133	0.96925	0.0020816	0.519	K2	0.1962
Dnpep	22	chr1:75307940-75308564	-	TE	0.018798	0.018366	0.00043167	0.527	K2	0.1962
Dnpep	23	chr1:75307896-75307939	-	TE	0.021383	0.030984	-0.0096013	0.637	K2	0.1962
Adss	2	chr1:177784896-177784998	-	CE	0.99847	0.99825	0.00021933	0.522	K0	0
Adss	3	chr1:177784049-177784117	-	CE	0.99897	0.9987	0.0002613	0.552	K0	0
Adss	4	chr1:177782843-177782893	-	CE	0.99903	0.99872	0.00031003	0.554	K0	0
Adss	5	chr1:177776813-177776879	-	CE	0.99864	0.99827	0.00036412	0.553	K0	0
Adss	6	chr1:177776457-177776564	-	CE	0.99786	0.99739	0.00046561	0.538	K0	0
Adss	7	chr1:177775581-177775662	-	CE	0.99803	0.99776	0.00027291	0.526	K0	0
Adss	8	chr1:177773575-177773701	-	CE	0.97821	0.94667	0.031544	0.888	K1	0.4338
Adss	9	chr1:177772072-177772226	-	CE	0.9982	0.99774	0.00045428	0.548	K0	0
Adss	10	chr1:177771141-177771265	-	CE	0.99856	0.99799	0.00057842	0.54	K0	0
Adss	11	chr1:177769925-177770022	-	CE	0.99874	0.99813	0.00061371	0.562	K0	0
Adss	12	chr1:177767655-177767804	-	CE	0.9983	0.99784	0.00045515	0.557	K0	0
Ttll4	2	chr1:74672844-74673010	+	CE	0.93102	0.79717	0.13386	0.942	K1	0.801
Ttll4	3	chr1:74678898-74680463	+	CE	0.99039	0.98856	0.0018302	0.505	K0	0
Ttll4	4	chr1:74681300-74681409	+	CE	0.99061	0.98964	0.00097854	0.54	K0	0
Ttll4	5	chr1:74681759-74681822	+	CE	0.99135	0.98881	0.0025426	0.56	K0	0
Ttll4	6	chr1:74685319-74685443	+	CE	0.99119	0.99028	0.00090567	0.518	K0	0
Ttll4	7	chr1:74685860-74685970	+	CE	0.99072	0.99014	0.00058788	0.521	K0	0
Ttll4	8	chr1:74686317-74686393	+	CE	0.98639	0.98533	0.0010595	0.518	K0	0
Ttll4	9	chr1:74687204-74687395	+	CE	0.98744	0.98677	0.00067368	0.551	K0	0
Ttll4	10	chr1:74687478-74687560	+	CE	0.99176	0.99168	7.8463e-05	0.522	K0	0
Ttll4	11	chr1:74687723-74687851	+	CE	0.99426	0.99414	0.00012082	0.508	K0	0
Ttll4	12	chr1:74688164-74688286	+	CE	0.99456	0.99427	0.00029493	0.525	K0	0
Ttll4	13	chr1:74688567-74688665	+	CE	0.99187	0.99268	-0.00081183	0.535	K0	0
Ttll4	14	chr1:74689323-74689457	+	CE	0.98865	0.9904	-0.0017498	0.518	K0	0
Ttll4	15	chr1:74689960-74690106	+	CE	0.98753	0.98656	0.00097004	0.523	K0	0
Ttll4	16	chr1:74695708-74695810	+	CE	0.98933	0.98697	0.0023627	0.565	K0	0
Ttll4	17	chr1:74696405-74696615	+	CE	0.99288	0.99239	0.00049114	0.532	K0	0
Ttll4	18	chr1:74696742-74696812	+	CE	0.99243	0.99271	-0.00027434	0.507	K0	0
Ttll4	19	chr1:74697179-74697249	+	CE	0.99261	0.99264	-2.7552e-05	0.508	K0	0
Ttll4	20	chr1:74697441-74697977	+	TE	0.17357	0.24559	-0.072023	0.718	K1	0.9092
Ttll4	21	chr1:74697978-74703730	+	TE	0.82646	0.75441	0.072052	0.723	K1	0.9092
Capn10	1	chr1:92934376-92934765	+	TS	0.81848	0.84324	-0.024759	0.532	K1	0.7803
Capn10	2	chr1:92934766-92935014	+	TS	0.18338	0.15576	0.027614	0.557	K1	0.7803
Capn10	3	chr1:92937945-92938076	+	CE	0.98767	0.98431	0.0033662	0.525	K0	0
Capn10	4	chr1:92939323-92939519	+	CE	0.98798	0.98381	0.0041753	0.576	K0	0
Capn10	5	chr1:92940283-92940500	+	CE	0.9635	0.93484	0.028662	0.604	K2	1.331
Capn10	7	chr1:92942482-92942623	+	CE	0.98117	0.98056	0.00061281	0.507	K0	0
Capn10	8	chr1:92943300-92943466	+	CE	0.98448	0.98348	0.0010036	0.537	K0	0
Capn10	9	chr1:92943679-92943941	+	CE	0.98128	0.98237	-0.0010917	0.503	K0	0
Capn10	10	chr1:92944695-92944897	+	CE	0.97632	0.97376	0.0025642	0.532	K0	0
Capn10	11	chr1:92945017-92945278	+	CE	0.97571	0.96259	0.013117	0.522	K0	0
Capn10	12	chr1:92946774-92946973	+	CE	0.97455	0.95797	0.016575	0.526	K0	0
Capn10	13	chr1:92947215-92947260	+	CE	0.96806	0.95675	0.011315	0.572	K0	0
Fmo1	5	chr1:162850062-162850224	-	CE	0.88749	0.93446	-0.04697	0.634	K0	0
Fmo1	6	chr1:162840218-162841064	-	AL	0.88513	0.93176	-0.046628	0.65	K0	0
Cul3	1	chr1:80340312-80340480	-	TS	0.13571	0.084752	0.050963	0.707	K1	0.8133
Cul3	2	chr1:80340246-80340311	-	TS	0.86303	0.91571	-0.052674	0.703	K1	0.8133
Cul3	3	chr1:80322859-80323056	-	CE	0.99806	0.9983	-0.00023597	0.548	K0	0
Cul3	4	chr1:80304080-80304193	-	CE	0.99884	0.99884	-5.1525e-06	0.54	K0	0
Cul3	5	chr1:80290082-80290242	-	CE	0.99867	0.99864	3.8688e-05	0.514	K0	0
Cul3	6	chr1:80288744-80288858	-	CE	0.99849	0.99858	-8.3413e-05	0.508	K0	0
Cul3	7	chr1:80286899-80287127	-	CE	0.99892	0.99893	-1.2262e-05	0.501	K0	0
Cul3	8	chr1:80283676-80283821	-	CE	0.99875	0.99869	5.4022e-05	0.508	K0	0
Cul3	9	chr1:80282623-80282799	-	CE	0.99854	0.99839	0.00014185	0.527	K0	0
Cul3	10	chr1:80281383-80281553	-	CE	0.99866	0.99851	0.00014606	0.512	K0	0
Cul3	11	chr1:80280833-80280940	-	CE	0.99849	0.99841	8.3075e-05	0.506	K0	0
Cul3	12	chr1:80277964-80278088	-	CE	0.99869	0.99855	0.0001391	0.508	K0	0
Cul3	13	chr1:80277375-80277471	-	CE	0.99861	0.99839	0.0002229	0.526	K0	0
Cul3	14	chr1:80276414-80276548	-	CE	0.99825	0.99798	0.00026901	0.536	K0	0
Cul3	15	chr1:80271524-80271710	-	CE	0.99606	0.99866	-0.0025973	0.709	K1	0.0647
Cul3	16	chr1:80269210-80269355	-	CE	0.99889	0.99889	-4.8231e-06	0.532	K0	0
Cul3	17	chr1:80266823-80267287	-	TE	0.80691	0.82222	-0.01531	0.675	K1	0.7432
Cul3	18	chr1:80264923-80266822	-	TE	0.19326	0.17795	0.015308	0.651	K1	0.7432
Clasp1	1	chr1:118389058-118389454	+	TS	0.0039588	0.004736	-0.00077726	0.554	K3	0.008
Clasp1	2	chr1:118389455-118389455	+	TS	0.003794	0.0047825	-0.0009885	0.571	K3	0.008
Clasp1	3	chr1:118389456-118389472	+	TS	0.003988	0.0049062	-0.00091819	0.569	K3	0.008
Clasp1	4	chr1:118389473-118389516	+	TS	0.9955	0.99465	0.00085144	0.542	K3	0.008
Clasp1	5	chr1:118389517-118389521	+	TS	0.0044688	0.0052256	-0.0007568	0.552	K3	0.008
Clasp1	7	chr1:118419560-118419723	+	TS	0.13004	0.21441	-0.084372	0.817	K1	0.8449
Clasp1	8	chr1:118419724-118419918	+	TS	0.86991	0.78648	0.08343	0.803	K1	0.8449
Clasp1	9	chr1:118459801-118459879	+	CE	0.98821	0.99047	-0.0022606	0.557	K2	0.2298
Clasp1	10	chr1:118461187-118461290	+	CE	0.98979	0.99095	-0.0011615	0.51	K2	0.2298
Clasp1	11	chr1:118462466-118462557	+	CE	0.9891	0.98127	0.0078261	0.677	K2	0.2298
Clasp1	12	chr1:118464528-118464603	+	CE	0.98588	0.98575	0.00013081	0.583	K2	0.2298
Clasp1	13	chr1:118467880-118467977	+	CE	0.99586	0.9874	0.0084572	0.817	K2	0.2298
Clasp1	14	chr1:118471772-118471839	+	CE	0.99429	0.99346	0.00082795	0.579	K0	0
Clasp1	15	chr1:118482039-118482092	+	AF	0.012063	0.013252	-0.0011896	0.534	K0	0
Clasp1	16	chr1:118497634-118497786	+	CE	0.99498	0.99468	0.0003064	0.531	K0	0
Clasp1	17	chr1:118499648-118499721	+	CE	0.99591	0.99641	-0.00049476	0.501	K0	0
Clasp1	18	chr1:118501302-118501394	+	CE	0.99609	0.99636	-0.00026961	0.522	K0	0
Clasp1	19	chr1:118502853-118502998	+	CE	0.99335	0.9939	-0.00054519	0.521	K0	0
Clasp1	20	chr1:118503820-118503955	+	CE	0.99529	0.99509	0.00019632	0.531	K0	0
Clasp1	21	chr1:118504896-118504966	+	CE	0.99593	0.99568	0.00025668	0.536	K0	0
Clasp1	22	chr1:118505482-118505541	+	CE	0.99291	0.99427	-0.001363	0.546	K0	0
Clasp1	23	chr1:118506940-118507017	+	CE	0.98622	0.98555	0.00066836	0.503	K1	0.1385
Clasp1	24	chr1:118508815-118508982	+	CE	0.99491	0.99412	0.00079643	0.544	K0	0
Clasp1	25	chr1:118509572-118509621	+	CE	0.99234	0.9915	0.00084228	0.546	K0	0
Clasp1	26	chr1:118510206-118510376	+	CE	0.99131	0.98911	0.0021999	0.563	K0	0
Clasp1	27	chr1:118512175-118512222	+	CE	0.21682	0.1766	0.040224	0.728	K1	0.8028
Clasp1	28	chr1:118512705-118512728	+	CE	0.015926	0.023045	-0.0071197	0.59	K0	0
Clasp1	29	chr1:118521827-118521934	+	CE	0.99229	0.98977	0.0025164	0.563	K0	0
Clasp1	30	chr1:118523321-118523347	+	CE	0.01512	0.023913	-0.0087929	0.621	K3	0.3235
Clasp1	31	chr1:118525297-118525455	+	CE	0.99359	0.98803	0.005554	0.648	K4	1.0543
Clasp1	32	chr1:118531978-118532085	+	CE	0.015019	0.023882	-0.0088627	0.648	K4	1.0543
Clasp1	33	chr1:118536135-118536197	+	CE	0.014311	0.011203	0.0031081	0.583	K1	0.0824
Clasp1	34	chr1:118539266-118539369	+	CE	0.99355	0.99012	0.0034273	0.612	K4	1.0903
Clasp1	35	chr1:118539370-118539382	+	AD	0.090079	0.094431	-0.0043514	0.558	K3	0.9106
Clasp1	36	chr1:118539773-118539783	+	CE	0.015942	0.016334	-0.0003917	0.543	K0	0
Clasp1	37	chr1:118541675-118541698	+	CE	0.033254	0.063166	-0.029912	0.803	K2	0.5235
Clasp1	38	chr1:118543102-118543104	+	AA	0.96617	0.96302	0.0031452	0.525	K2	0.5235
Clasp1	39	chr1:118543105-118543346	+	CE	0.99368	0.9935	0.00017454	0.511	K0	0
Clasp1	40	chr1:118545393-118545456	+	CE	0.99094	0.99066	0.00027711	0.511	K0	0
Clasp1	41	chr1:118546881-118546949	+	CE	0.096041	0.049173	0.046868	0.728	K1	0.5074
Clasp1	42	chr1:118547656-118547658	+	CE	0.97623	0.97216	0.0040712	0.552	K0	0
Clasp1	43	chr1:118547865-118548028	+	CE	0.99141	0.9888	0.0026049	0.558	K0	0
Clasp1	44	chr1:118551087-118551165	+	CE	0.99543	0.995	0.00043817	0.51	K0	0
Clasp1	45	chr1:118552013-118552156	+	CE	0.99227	0.99196	0.00030409	0.527	K1	0.0747
Clasp1	46	chr1:118559986-118560129	+	CE	0.99186	0.99139	0.0004617	0.521	K0	0
Clasp1	47	chr1:118561011-118561117	+	CE	0.99039	0.98956	0.00083315	0.513	K0	0
Clasp1	48	chr1:118565143-118565259	+	CE	0.073488	0.048689	0.024799	0.702	K1	0.4454
Clasp1	49	chr1:118570849-118570999	+	CE	0.98991	0.99084	-0.00092977	0.519	K0	0
Clasp1	50	chr1:118578821-118579064	+	CE	0.99257	0.99188	0.00069119	0.519	K0	0
[truncated: 128,358 more rows]
