# Supplementary material for: A novel SATB1 protein isoform with different biophysical properties
Source: Front Cell Dev Biol. 2023 Aug 11;11:1242481. doi: 10.3389/fcell.2023.1242481 (PMC10457122; doi:10.3389/fcell.2023.1242481)
Supplement: Supplementary file 3 [file DataSheet3.xlsx]

## Sheet: splicing_efficiency
							Total count of reads at exon-intron and exon-exon junctions					Reads at 3 prime exon end junctions				Reads at 5 prime exon end junctions					3 prime exon end junctions analysis					5 prime exon end junctions analysis					SATB1 binding analysis
							WT		Satb1 cKO			WT		Satb1 cKO		WT		Satb1 cKO			WT	Satb1 cKO				WT	Satb1 cKO
chrom	start	end	strand	gene	gene_ID	gene_length	total_WT_intron	total_WT_exon	total_SKO_intron	total_SKO_exon		3prime_WT_intron	3prime_WT_exon	3prime_SKO_intron	3prime_SKO_exon	5prime_WT_intron	5prime_WT_exon	5prime_SKO_intron	5prime_SKO_exon		3prime_WT_intron/exon_ratio	3prime_SKO_intron/exon_ratio	3prime_log2(SKO/WT)	3prime_SKO-WT_difference		5prime_WT_intron/exon_ratio	5prime_SKO_intron/exon_ratio	5prime_log2(SKO/WT)	5prime_SKO-WT_difference		Number_of_overlapping_SATB1_peaks	SATB1-peak-overlap_normalized_to_1kbp	SATB1_peak_fold-change_SUM	SATB1_peak_fold-change_SUM_normalized_to_1kbp
chr1	4773206	4785739	-	Mrpl15	ENSMUSG00000033845.13	12533	617	1895	618	2047		20	1895	28	2047	597	1895	590	2047		1.05541	1.36786	0.374112	0.312446		31.504	28.8227	-0.128329	-2.68129		0	0	0	0
chr1	4807788	4848410	+	Lypla1	ENSMUSG00000025903.14	40622	870	3467	972	3409		834	3467	941	3409	36	3467	31	3409		24.0554	27.6034	0.198487	3.54802		1.03836	0.90936	-0.191389	-0.129004		0	0	0	0
chr1	4857814	4897909	+	Tcea1	ENSMUSG00000033813.15	40095	1783	4383	1909	4995		1646	4383	1768	4995	137	4383	141	4995		37.5542	35.3954	-0.0854121	-2.15879		3.12572	2.82282	-0.147047	-0.30289		0	0	0	0
chr1	5070018	5162529	+	Atp6v1h	ENSMUSG00000033793.12	92511	1953	9433	1846	9107		1819	9433	1737	9107	134	9433	109	9107		19.2834	19.0732	-0.015807	-0.210127		1.42055	1.19688	-0.247164	-0.223663		0	0	0	0
chr1	6206197	6276648	+	Rb1cc1	ENSMUSG00000025907.14	70451	4675	20254	4179	18917		3992	20254	3567	18917	683	20254	612	18917		19.7097	18.8561	-0.063877	-0.853632		3.37217	3.23519	-0.0598304	-0.136988		0	0	0	0
chr1	6487231	6860940	+	St18	ENSMUSG00000033740.17	373709	13	1287	12	1473		9	1287	12	1473	4	1287	0	1473		0.699308	0.814671	0.220288	0.115362		0.310808	6.78887e-06	-15.4825	-0.310801		0	0	0	0
chr1	7088920	7173628	+	Pcmtd1	ENSMUSG00000051285.17	84708	574	8292	608	8492		459	8292	480	8492	115	8292	128	8492		5.53546	5.65238	0.030156	0.116923		1.38688	1.5073	0.120126	0.120422		0	0	0	0
chr1	7349406	7397869	-	Gm26901	ENSMUSG00000097797.6	48463	5	343	15	384		3	343	9	384	2	343	6	384		0.874664	2.34378	1.42203	1.46911		0.583119	1.56253	1.42202	0.979406		0	0	0	0
chr1	8361475	9299878	-	Sntg1	ENSMUSG00000025909.16	938403	0	204	0	135		0	204	0	135	0	204	0	135		4.90196e-05	7.4074e-05	0.595609	2.50544e-05		4.90196e-05	7.4074e-05	0.595609	2.50544e-05		0	0	0	0
chr1	9547948	9580673	+	Adhfe1	ENSMUSG00000025911.14	32725	29	165	17	160		14	165	10	160	15	165	7	160		8.4849	6.25006	-0.441029	-2.23485		9.09096	4.37506	-1.05513	-4.7159		0	0	0	0
chr1	9667415	9700209	-	Mybl1	ENSMUSG00000025912.16	32794	395	1571	696	2690		50	1571	97	2690	345	1571	599	2690		3.18269	3.60595	0.180132	0.423259		21.9605	22.2677	0.0200365	0.307121		0	0	0	0
chr1	9718622	9748382	-	Vcpip1	ENSMUSG00000045210.8	29760	181	3763	388	4142		26	3763	33	4142	155	3763	355	4142		0.690941	0.796719	0.205509	0.105778		4.11906	8.57074	1.05711	4.45168		2	0.0672043	5.3154	0.178609
chr1	9747648	9791924	+	1700034P13Rik	ENSMUSG00000097893.8	44276	1	122	3	91		1	122	2	91	0	122	1	91		0.819753	2.19791	1.42287	1.37816		8.19671e-05	1.09901	13.7108	1.09893		2	0.0451712	5.43014	0.122643
chr1	9798107	9900845	+	Sgk3	ENSMUSG00000025915.14	102738	1905	7180	1206	4359		1661	7180	1075	4359	244	7180	131	4359		23.1337	24.6616	0.0922713	1.52792		3.39833	3.00528	-0.177327	-0.393051		3	0.0292005	8.31711	0.0809546
chr1	9908638	9942085	+	Mcmdc2	ENSMUSG00000046101.16	33447	39	405	25	346		27	405	23	346	12	405	2	346		6.66669	6.64743	-0.00417481	-0.0192639		2.96299	0.578063	-2.35775	-2.38492		0	0	0	0
chr1	9941959	9944118	-	Snhg6	ENSMUSG00000098234.7	2159	202	992	182	940		22	992	23	940	180	992	159	940		2.21775	2.44682	0.141809	0.229067		18.1452	16.9149	-0.101291	-1.23027		0	0	0	0
chr1	10024601	10038168	-	Cops5	ENSMUSG00000025917.9	13567	890	3516	964	3710		147	3516	165	3710	743	3516	799	3710		4.18089	4.44744	0.0891656	0.266552		21.132	21.5364	0.0273492	0.40442		1	0.0737083	3.12423	0.230282
chr1	10037987	10136768	+	Cspp1	ENSMUSG00000056763.16	98781	2819	19135	2809	18200		2305	19135	2360	18200	514	19135	449	18200		12.046	12.967	0.106296	0.921044		2.68618	2.46703	-0.122777	-0.219144		0	0	0	0
chr1	10137571	10232670	-	Arfgef1	ENSMUSG00000067851.11	95099	5115	19897	6048	22003		389	19897	478	22003	4726	19897	5570	22003		1.95507	2.17243	0.152091	0.217362		23.7523	25.3147	0.0919084	1.56241		1	0.0105154	2.7337	0.0287458
chr1	10993465	11303681	+	Prex2	ENSMUSG00000048960.13	310216	6	85	6	55		6	85	6	55	0	85	0	55		7.05893	10.9093	0.62803	3.85032		0.000117647	0.000181818	0.62803	6.41709e-05		0	0	0	0
chr1	11414105	11975901	+	A830018L16Rik	ENSMUSG00000057715.13	561796	1	82	3	48		1	82	2	48	0	82	1	48		1.21963	4.16687	1.77252	2.94723		0.000121951	2.08354	14.0604	2.08342		1	0.00178001	2.66861	0.00475014
chr1	12692277	12861192	+	Sulf1	ENSMUSG00000016918.15	168915	20	436	8	110		15	436	6	110	5	436	2	110		3.44039	5.45463	0.66491	2.01424		1.14681	1.81827	0.664939	0.671459		0	0	0	0
chr1	12866549	12992650	-	Slco5a1	ENSMUSG00000025938.16	126101	27	608	10	180		9	608	2	180	18	608	8	180		1.48028	1.11117	-0.413795	-0.369113		2.96054	4.4445	0.586159	1.48396		1	0.00793015	2.63907	0.0209282
chr1	13139105	13374083	-	Ncoa2	ENSMUSG00000005886.14	234978	1914	14826	2934	18833		273	14826	366	18833	1641	14826	2568	18833		1.84136	1.9434	0.0778091	0.102037		11.0684	13.6356	0.300937	2.56725		4	0.0170229	10.5968	0.0450972
chr1	13564698	13589910	-	Tram1	ENSMUSG00000025935.10	25212	7476	15823	6227	13086		260	15823	207	13086	7216	15823	6020	13086		1.64318	1.58184	-0.0548817	-0.0613343		45.6045	46.0034	0.0125631	0.398863		0	0	0	0
chr1	13623330	13660546	-	Lactb2	ENSMUSG00000025937.6	37216	192	1795	174	1442		18	1795	12	1442	174	1795	162	1442		1.00279	0.832184	-0.269046	-0.170607		9.6936	11.2344	0.212819	1.5408		0	0	0	0
chr1	14168954	14310235	-	Eya1	ENSMUSG00000025932.14	141281	23	514	18	366		8	514	4	366	15	514	14	366		1.55644	1.09292	-0.510057	-0.463516		2.91831	3.82516	0.39039	0.906856		0	0	0	0
chr1	15805646	15844052	+	Terf1	ENSMUSG00000025925.14	38406	1567	12222	1747	14831		1384	12222	1532	14831	183	12222	215	14831		11.3238	10.3297	-0.132563	-0.994128		1.4973	1.44967	-0.0466426	-0.0476339		2	0.0520752	5.69821	0.148368
chr1	15853862	15892722	-	Sbspon	ENSMUSG00000032719.4	38860	24	382	43	557		7	382	16	557	17	382	27	557		1.83249	2.87255	0.648529	1.04006		4.45029	4.84741	0.123317	0.397127		0	0	0	0
chr1	16101295	16104662	-	Rpl7	ENSMUSG00000043716.13	3367	14593	39044	15364	40675		64	39044	82	40675	14529	39044	15282	40675		0.163918	0.201598	0.29851	0.0376804		37.2119	37.571	0.0138565	0.359126		0	0	0	0
chr1	16105774	16133734	+	Rdh10	ENSMUSG00000025921.7	27960	197	2501	207	2661		173	2501	170	2661	24	2501	37	2661		6.91724	6.38858	-0.114701	-0.528658		0.95962	1.39046	0.535025	0.430838		0	0	0	0
chr1	16228674	16520112	-	Stau2	ENSMUSG00000025920.19	291438	43	961	28	564		2	961	4	564	41	961	24	564		0.208127	0.709237	1.76881	0.501111		4.2664	4.25534	-0.00374585	-0.011063		4	0.013725	10.7875	0.0370147
chr1	16540790	16619489	-	Ube2w	ENSMUSG00000025939.17	78699	328	8685	382	8507		164	8685	121	8507	164	8685	261	8507		1.88831	1.42236	-0.408813	-0.465955		1.88831	3.06806	0.700229	1.17975		0	0	0	0
chr1	16641725	16657042	-	Eloc	ENSMUSG00000079658.9	15317	1154	4706	1132	4361		87	4706	70	4361	1067	4706	1062	4361		1.84871	1.60514	-0.203818	-0.243567		22.6732	24.3522	0.103066	1.67903		1	0.0652869	2.53844	0.165727
chr1	16665207	16678275	+	Tmem70	ENSMUSG00000025940.6	13068	220	1757	216	1702		181	1757	189	1702	39	1757	27	1702		10.3017	11.1046	0.10828	0.802932		2.2197	1.58637	-0.48463	-0.633323		0	0	0	0
chr1	16688051	16709611	+	Ly96	ENSMUSG00000025779.10	21560	85	877	100	941		64	877	70	941	21	877	30	941		7.29762	7.4389	0.027665	0.141289		2.39454	3.18811	0.412953	0.79357		2	0.0927644	5.28344	0.245058
chr1	16964560	17097889	-	Jph1	ENSMUSG00000042686.5	133329	1	59	1	15		0	59	0	15	1	59	1	15		0.000169491	0.000666662	1.97575	0.000497171		1.69508	6.66729	1.97575	4.97221		3	0.0225007	8.21819	0.0616384
chr1	20057779	20618064	-	Pkhd1	ENSMUSG00000043760.16	560285	4	52	1	32		1	52	0	32	3	52	1	32		1.92327	0.000312499	-12.5874	-1.92295		5.76941	3.1253	-0.884428	-2.64411		0	0	0	0
chr1	20802968	20820312	-	Mcm3	ENSMUSG00000041859.10	17344	4827	7500	7189	10049		176	7500	220	10049	4651	7500	6969	10049		2.34667	2.18927	-0.100162	-0.157394		62.0133	69.3502	0.161321	7.33685		0	0	0	0
chr1	20890606	20939650	+	Paqr8	ENSMUSG00000025931.15	49044	14	185	25	203		13	185	20	203	1	185	5	203		7.02708	9.85226	0.48753	2.82518		0.540594	2.4631	2.18786	1.92251		0	0	0	0
chr1	20951626	20990841	+	Efhc1	ENSMUSG00000041809.5	39215	25	342	31	284		20	342	26	284	5	342	5	284		5.84798	9.15496	0.646615	3.30698		1.46202	1.7606	0.268105	0.298581		1	0.0255004	2.99405	0.0763496
chr1	20996299	21079229	-	Tram2	ENSMUSG00000041779.5	82930	184	4641	149	4511		35	4641	22	4511	149	4641	127	4511		0.75415	0.487699	-0.628861	-0.266451		3.21052	2.81534	-0.189495	-0.395175		1	0.0120584	2.63907	0.0318229
chr1	21218575	21230167	+	Tmem14a	ENSMUSG00000025933.15	11592	28	188	52	321		25	188	39	321	3	188	13	321		13.2979	12.1496	-0.130296	-1.14836		1.5958	4.04987	1.3436	2.45408		1	0.0862664	2.66861	0.230211
chr1	21240589	21265661	+	Gsta3	ENSMUSG00000025934.15	25072	18	177	15	211		9	177	8	211	9	177	7	211		5.0848	3.79151	-0.423417	-1.29328		5.0848	3.31758	-0.616059	-1.76722		0	0	0	0
chr1	21285246	21298312	-	Gm4956	ENSMUSG00000025936.15	13066	58	441	107	675		29	441	24	675	29	441	83	675		6.57598	3.55557	-0.887126	-3.02042		6.57598	12.2963	0.902946	5.72032		0	0	0	0
chr1	21312517	21316320	-	Gm21909	ENSMUSG00000093963.1	3803	15	101	22	124		10	101	9	124	5	101	13	124		9.90108	7.25814	-0.447986	-2.64294		4.95059	10.4839	1.08251	5.53335		0	0	0	0
chr1	21398403	21961942	-	Kcnq5	ENSMUSG00000028033.16	563539	151	22395	278	42972		30	22395	60	42972	121	22395	218	42972		0.133959	0.139626	0.0597773	0.00566712		0.5403	0.507307	-0.0908997	-0.0329923		1	0.0017745	2.59639	0.00460729
chr1	23366424	23397772	-	Ogfrl1	ENSMUSG00000026158.11	31348	76	207	117	251		17	207	16	251	59	207	101	251		8.2126	6.37454	-0.365519	-1.83807		28.5024	40.2391	0.497511	11.7366		0	0	0	0
chr1	23761753	23849158	+	B3gat2	ENSMUSG00000026156.8	87405	48	63	34	47		34	63	25	47	14	63	9	47		53.9683	53.1916	-0.0209148	-0.776738		22.2223	19.1491	-0.214734	-3.07324		0	0	0	0
chr1	23844846	23922317	-	Smap1	ENSMUSG00000026155.13	77471	820	9911	1069	11650		153	9911	201	11650	667	9911	868	11650		1.54374	1.72532	0.160436	0.181582		6.7299	7.45064	0.146781	0.720748		0	0	0	0
chr1	23995939	24005656	-	Sdhaf4	ENSMUSG00000026154.4	9717	3	144	4	205		1	144	2	205	2	144	2	205		0.694513	0.975658	0.490373	0.281145		1.38896	0.975658	-0.509555	-0.413299		0	0	0	0
chr1	24011093	24100341	-	Fam135a	ENSMUSG00000026153.15	89248	42	201	25	145		4	201	2	145	38	201	23	145		1.9901	1.37938	-0.528822	-0.61072		18.9055	15.8621	-0.253221	-3.04339		0	0	0	0
chr1	24261890	24587472	-	Col19a1	ENSMUSG00000026141.13	325582	9	111	2	39		1	111	0	39	8	111	2	39		0.90099	0.00025641	-11.7788	-0.900734		7.20729	5.12845	-0.490935	-2.07884		0	0	0	0
chr1	24678630	24766301	+	Lmbrd1	ENSMUSG00000073725.8	87671	1954	14414	1791	14709		1713	14414	1542	14709	241	14414	249	14709		11.8843	10.4834	-0.180951	-1.4009		1.67199	1.69284	0.0178842	0.0208555		0	0	0	0
chr1	30802339	30873921	-	Phf3	ENSMUSG00000048874.15	71582	2085	15665	2120	14805		319	15665	301	14805	1766	15665	1819	14805		2.03639	2.0331	-0.00233263	-0.00328989		11.2735	12.2864	0.12412	1.01285		0	0	0	0
chr1	30940302	30949309	-	Ptp4a1	ENSMUSG00000026064.16	9007	201	308	214	297		19	308	20	297	182	308	194	297		6.16886	6.73404	0.126468	0.565177		59.0909	65.3199	0.144586	6.22895		0	0	0	0
chr1	33453810	33669795	-	Prim2	ENSMUSG00000026134.11	215985	1281	9641	1627	16184		57	9641	74	16184	1224	9641	1553	16184		0.591226	0.457242	-0.370751	-0.133984		12.6958	9.5959	-0.403859	-3.09988		2	0.0092599	5.45026	0.0252344
chr1	33719887	33742564	+	Rab23	ENSMUSG00000004768.14	22677	39	470	84	791		22	470	57	791	17	470	27	791		4.68087	7.20608	0.622438	2.52521		3.61704	3.41341	-0.0835953	-0.203629		0	0	0	0
chr1	33745484	33757795	-	Bag2	ENSMUSG00000042215.8	12311	6	195	2	261		3	195	1	261	3	195	1	261		1.53851	0.38318	-2.00544	-1.15533		1.53851	0.38318	-2.00544	-1.15533		1	0.0812282	2.52433	0.205047
chr1	33761545	33814595	-	Zfp451	ENSMUSG00000042197.13	53050	1162	8077	1034	7529		221	8077	160	7529	941	8077	874	7529		2.73617	2.12512	-0.364613	-0.611048		11.6504	11.6084	-0.00520015	-0.0419178		0	0	0	0
chr1	33852052	33907816	-	Bend6	ENSMUSG00000042182.16	55764	4	67	12	68		1	67	3	68	3	67	9	68		1.49268	4.41191	1.56349	2.91922		4.47775	13.2354	1.56356	8.75767		0	0	0	0
chr1	33908225	34308661	+	Dst	ENSMUSG00000026131.18	400436	1688	3921	2410	5353		1560	3921	2292	5353	128	3921	118	5353		39.7858	42.8171	0.105935	3.03134		3.26448	2.20437	-0.566483	-1.0601		5	0.0124864	13.7017	0.034217
chr1	34436670	34439672	-	Ccdc115	ENSMUSG00000042111.9	3002	238	229	299	304		5	229	9	304	233	229	290	304		2.18345	2.96056	0.439261	0.777109		101.747	95.3947	-0.0930007	-6.35199		3	0.999334	8.83862	2.94424
chr1	34439851	34449356	+	Imp4	ENSMUSG00000026127.13	9505	1277	2046	1425	2227		1135	2046	1302	2227	142	2046	123	2227		55.4741	58.4643	0.0757417	2.99021		6.94038	5.52313	-0.329528	-1.41725		0	0	0	0
chr1	34459762	34475733	+	Ptpn18	ENSMUSG00000026126.15	15971	1085	2100	1261	2450		954	2100	1089	2450	131	2100	172	2450		45.4286	44.449	-0.0314496	-0.979592		6.2381	7.02041	0.170449	0.782312		3	0.18784	8.08934	0.506502
chr1	34477167	34485933	-	4930568A12Rik	ENSMUSG00000101223.6	8766	66	507	109	669		29	507	51	669	37	507	58	669		5.71994	7.62333	0.414422	1.90339		7.29785	8.66967	0.248506	1.37182		0	0	0	0
chr1	34678188	34813309	+	Arhgef4	ENSMUSG00000037509.20	135121	269	1390	242	1226		215	1390	186	1226	54	1390	56	1226		15.4676	15.1713	-0.027908	-0.296336		3.8849	4.56771	0.233593	0.682809		2	0.0148015	5.32312	0.0393952
chr1	34813219	34843065	-	Fam168b	ENSMUSG00000037503.12	29846	1949	12497	2106	12520		214	12497	206	12520	1735	12497	1900	12520		1.71241	1.64537	-0.0576192	-0.0670436		13.8833	15.1757	0.128411	1.29239		0	0	0	0
chr1	34849976	34879580	+	Plekhb2	ENSMUSG00000026123.11	29604	785	2451	870	2874		744	2451	844	2874	41	2451	26	2874		30.355	29.3667	-0.0477492	-0.988221		1.67279	0.904666	-0.8868	-0.768125		0	0	0	0
chr1	35625606	35651297	-	Gm37068	ENSMUSG00000104417.1	25691	20	647	16	578		9	647	5	578	11	647	11	578		1.39105	0.865069	-0.685288	-0.525982		1.70017	1.90313	0.162696	0.202961		0	0	0	0
chr1	36068400	36106446	+	Hs6st1	ENSMUSG00000045216.7	38046	19	14995	5	6584		6	14995	3	6584	13	14995	2	6584		0.040014	0.0455665	0.187469	0.00555252		0.0866962	0.0303782	-1.51293	-0.056318		2	0.0525679	5.42243	0.142523
chr1	36105384	36106446	-	Gm37335	ENSMUSG00000104523.1	1062	276	1834	117	768		145	1834	64	768	131	1834	53	768		7.90622	8.33335	0.0759075	0.427124		7.14286	6.90105	-0.0496856	-0.241808		0	0	0	0
chr1	36132042	36138746	+	Gm33280	ENSMUSG00000102202.1	6704	19	94	22	118		15	94	15	118	4	94	7	118		15.9575	12.7119	-0.328054	-3.2456		4.25542	5.93228	0.479286	1.67686		0	0	0	0
chr1	36140027	36244720	-	Uggt1	ENSMUSG00000037470.14	104693	9462	23308	8807	22087		504	23308	517	22087	8958	23308	8290	22087		2.16235	2.34074	0.114368	0.178396		38.4332	37.5334	-0.0341768	-0.899765		3	0.0286552	7.82641	0.0747558
chr1	36264597	36274679	-	Neurl3	ENSMUSG00000047180.8	10082	80	393	90	420		17	393	22	420	63	393	68	420		4.32572	5.23812	0.276107	0.912394		16.0306	16.1905	0.0143228	0.15994		0	0	0	0
chr1	36307733	36324029	+	Arid5a	ENSMUSG00000037447.16	16296	305	2097	299	2053		252	2097	239	2053	53	2097	60	2053		12.0172	11.6415	-0.0458199	-0.375667		2.52742	2.92256	0.209563	0.395132		0	0	0	0
chr1	36335730	36369181	-	Kansl3	ENSMUSG00000010453.12	33451	2628	7821	2760	8275		304	7821	340	8275	2324	7821	2420	8275		3.88697	4.10876	0.0800571	0.22179		29.7149	29.2447	-0.0230093	-0.470157		2	0.0597889	5.67975	0.169793
chr1	36372291	36422110	+	Fer1l5	ENSMUSG00000037432.15	49819	1326	3753	1114	2946		694	3753	606	2946	632	3753	508	2946		18.4919	20.5703	0.153669	2.07839		16.8399	17.2437	0.0341908	0.403859		1	0.0200727	2.9833	0.0598828
chr1	36419871	36445271	-	Lman2l	ENSMUSG00000001143.13	25400	873	8074	815	6895		327	8074	270	6895	546	8074	545	6895		4.05004	3.91588	-0.0485981	-0.134156		6.76245	7.90428	0.225088	1.14183		0	0	0	0
chr1	36471620	36508764	+	Cnnm4	ENSMUSG00000037408.10	37144	216	730	271	841		193	730	244	841	23	730	27	841		26.4384	29.0131	0.134071	2.57472		3.1507	3.21048	0.0271153	0.059777		0	0	0	0
chr1	36511867	36528237	+	Cnnm3	ENSMUSG00000001138.13	16370	428	2060	528	2325		317	2060	401	2325	111	2060	127	2325		15.3884	17.2473	0.164533	1.85896		5.38835	5.46237	0.0196823	0.0740156		1	0.0610874	2.57039	0.157018
chr1	36527534	36528237	-	Gm38033	ENSMUSG00000102845.1	703	23	59	37	82		12	59	22	82	11	59	15	82		20.3391	26.8294	0.399555	6.49024		18.6442	18.2928	-0.0274528	-0.351423		0	0	0	0
chr1	36530188	36536883	-	Ankrd23	ENSMUSG00000067653.12	6695	199	294	124	238		48	294	33	238	151	294	91	238		16.3266	13.8656	-0.235713	-2.46098		51.3606	38.2353	-0.425755	-13.1252		0	0	0	0
chr1	36537507	36547445	-	Ankrd39	ENSMUSG00000079610.9	9938	68	336	72	283		4	336	4	283	64	336	68	283		1.19051	1.41346	0.247659	0.222957		19.0476	24.0283	0.335122	4.98065		0	0	0	0
chr1	36548639	36558349	-	Sema4c	ENSMUSG00000026121.13	9710	84	156	59	109		20	156	12	109	64	156	47	109		12.8206	11.0093	-0.219743	-1.81131		41.0257	43.1193	0.0718072	2.09364		0	0	0	0
chr1	36691449	36693681	+	Cox5b	ENSMUSG00000061518.11	2232	957	3814	1130	4276		930	3814	1098	4276	27	3814	32	4276		24.3839	25.6782	0.0746184	1.29435		0.707921	0.748365	0.0801547	0.0404445		0	0	0	0
chr1	36698114	36714422	-	Actr1b	ENSMUSG00000037351.9	16308	2028	3824	2034	3740		151	3824	151	3740	1877	3824	1883	3740		3.94875	4.03744	0.0320443	0.0886884		49.0847	50.3476	0.0366486	1.26287		0	0	0	0
chr1	36761798	36782818	+	Zap70	ENSMUSG00000026117.10	21020	4110	9203	3910	8775		3806	9203	3636	8775	304	9203	274	8775		41.3561	41.4359	0.00278174	0.0798179		3.30327	3.12251	-0.0811903	-0.180763		2	0.0951475	5.37581	0.255747
chr1	36792191	36943666	-	Tmem131	ENSMUSG00000026116.11	151475	6869	22919	7778	24374		934	22919	896	24374	5935	22919	6882	24374		4.07522	3.67605	-0.148723	-0.399173		25.8955	28.235	0.124781	2.33946		5	0.0330087	13.1478	0.0867985
chr1	36913601	36916539	-	Gm38115	ENSMUSG00000102930.1	2938	28	164	28	170		6	164	3	170	22	164	25	170		3.6586	1.76476	-1.05181	-1.89383		13.4147	14.7059	0.132585	1.29125		1	0.340368	2.79879	0.952617
chr1	37299865	37410736	+	Inpp4a	ENSMUSG00000026113.17	110871	790	5305	921	5520		677	5305	793	5520	113	5305	128	5520		12.7615	14.3659	0.170849	1.6044		2.13007	2.31884	0.122505	0.188775		4	0.036078	10.7837	0.0972634
chr1	37417084	37430103	-	Coa5	ENSMUSG00000026112.7	13019	25	850	153	804		12	850	17	804	13	850	136	804		1.41178	2.11444	0.582764	0.702664		1.52942	16.9154	3.46728	15.386		0	0	0	0
chr1	37430139	37439124	+	Unc50	ENSMUSG00000026111.15	8985	1255	3965	1335	3779		900	3965	988	3779	355	3965	347	3779		22.6986	26.1445	0.203902	3.44587		8.95334	9.18233	0.036433	0.228982		0	0	0	0
chr1	37439340	37541016	-	Mgat4a	ENSMUSG00000026110.15	101676	1154	11801	931	8275		110	11801	88	8275	1044	11801	843	8275		0.932125	1.06345	0.19015	0.13132		8.84671	10.1873	0.203561	1.3406		1	0.00983516	2.89834	0.0285056
chr1	37611677	37720085	-	2010300C02Rik	ENSMUSG00000026090.16	108408	66	213	23	54		21	213	7	54	45	213	16	54		9.8592	12.9631	0.394871	3.10393		21.1268	29.6298	0.487973	8.50296		6	0.0553465	16.9461	0.156318
chr1	37754776	37866429	-	Tsga10	ENSMUSG00000060771.14	111653	231	2099	172	2242		31	2099	34	2242	200	2099	138	2242		1.4769	1.51651	0.038182	0.0396091		9.52835	6.15522	-0.630416	-3.37313		0	0	0	0
chr1	37874801	37890411	-	Mitd1	ENSMUSG00000026088.15	15610	882	3056	978	3147		170	3056	161	3147	712	3056	817	3147		5.56283	5.11599	-0.120807	-0.446844		23.2984	25.9612	0.156126	2.6628		0	0	0	0
chr1	37890477	37898535	+	Mrpl30	ENSMUSG00000026087.11	8058	751	2074	699	2073		677	2074	640	2073	74	2074	59	2073		32.6422	30.8731	-0.0803881	-1.76911		3.56799	2.84612	-0.326114	-0.721868		0	0	0	0
chr1	37985189	37997893	-	Txndc9	ENSMUSG00000058407.12	12704	416	3108	393	3109		22	3108	20	3109	394	3108	373	3109		0.707854	0.643297	-0.137967	-0.064557		12.677	11.9974	-0.0794841	-0.679536		2	0.157431	5.57795	0.43907
chr1	37998010	38055579	+	Eif5b	ENSMUSG00000026083.12	57569	2179	7907	2240	7477		1977	7907	2047	7477	202	7907	193	7477		25.0032	27.3773	0.130869	2.37413		2.5547	2.58125	0.0149165	0.0265509		1	0.0173705	2.66861	0.046355
chr1	38052786	38129801	-	Rev1	ENSMUSG00000026082.11	77015	1621	9525	1608	9717		252	9525	229	9717	1369	9525	1379	9717		2.64567	2.3567	-0.166868	-0.288975		14.3727	14.1916	-0.0182919	-0.18108		2	0.025969	5.28962	0.068683
chr1	38076295	38077305	-	Gm37062	ENSMUSG00000103804.1	1010	37	106	29	104		14	106	16	104	23	106	13	104		13.2076	15.3847	0.220125	2.17707		21.6982	12.5001	-0.795637	-9.1981		0	0	0	0
chr1	38177326	38664955	-	Aff3	ENSMUSG00000037138.17	487629	3077	88634	2447	78554		332	88634	305	78554	2745	88634	2142	78554		0.374574	0.388268	0.0518015	0.0136939		3.09701	2.72679	-0.183672	-0.370219		7	0.0143552	19.1575	0.039287
chr1	38235420	38246666	+	Gm16150	ENSMUSG00000085391.1	11246	405	4283	336	3848		256	4283	214	3848	149	4283	122	3848		5.97712	5.56133	-0.10402	-0.415788		3.47887	3.17048	-0.133918	-0.308392		0	0	0	0
chr1	38307902	38311930	+	Gm16151	ENSMUSG00000085280.1	4028	153	1856	138	1578		73	1856	78	1578	80	1856	60	1578		3.93319	4.94297	0.329677	1.00978		4.31035	3.80229	-0.180937	-0.508063		0	0	0	0
chr1	38384949	38393974	+	Gm16152	ENSMUSG00000087131.7	9025	290	3089	271	2743		161	3089	131	2743	129	3089	140	2743		5.21205	4.7758	-0.126108	-0.436249		4.17611	5.1039	0.289441	0.927792		0	0	0	0
chr1	38863867	38898161	-	Chst10	ENSMUSG00000026080.13	34294	287	2922	227	2253		43	2922	49	2253	244	2922	178	2253		1.4716	2.17488	0.563554	0.703284		8.35045	7.90058	-0.0798948	-0.449867		2	0.0583192	5.26699	0.153583
chr1	38884754	38888072	+	Gm37707	ENSMUSG00000103647.1	3318	15	315	14	205		9	315	10	205	6	315	4	205		2.85717	4.8781	0.771729	2.02092		1.90479	1.95127	0.0347772	0.0464743		0	0	0	0
chr1	38985608	38997238	+	Pdcl3	ENSMUSG00000026078.10	11630	812	1254	936	1390		744	1254	869	1390	68	1254	67	1390		59.3301	62.518	0.075506	3.18784		5.42266	4.82015	-0.169921	-0.602504		2	0.171969	5.06496	0.435508
chr1	39193731	39363236	+	Npas2	ENSMUSG00000026077.15	169505	86	1985	113	1795		66	1985	83	1795	20	1985	30	1795		3.32494	4.62396	0.4758	1.29902		1.00756	1.67131	0.730115	0.663753		5	0.0294977	13.2067	0.0779132
chr1	39367842	39371911	+	Rpl31	ENSMUSG00000073702.11	4069	5327	20153	366	26352		5190	20153	252	26352	137	20153	114	26352		25.753	0.956285	-4.75116	-24.7967		0.6798	0.432605	-0.65206	-0.247195		0	0	0	0
chr1	39371492	39478755	-	Tbc1d8	ENSMUSG00000003134.10	107263	577	5540	576	5358		133	5540	134	5358	444	5540	442	5358		2.40072	2.50094	0.0589981	0.100211		8.01444	8.24935	0.0416781	0.234906		1	0.00932288	2.53844	0.0236656
chr1	39534992	39546889	+	Cnot11	ENSMUSG00000003135.15	11897	777	1761	862	1769		730	1761	803	1769	47	1761	59	1769		41.4537	45.3929	0.130964	3.93916		2.66894	3.33522	0.321514	0.666279		0	0	0	0
chr1	39547570	39552002	-	Gm15832	ENSMUSG00000085894.1	4432	28	218	29	181		15	218	13	181	13	218	16	181		6.88078	7.18237	0.0618889	0.301595		5.96335	8.83983	0.567897	2.87648		0	0	0	0
chr1	39551296	39577405	-	Rnf149	ENSMUSG00000048234.13	26109	518	2519	502	2263		61	2519	58	2263	457	2519	444	2263		2.4216	2.56297	0.0818583	0.141374		18.1421	19.62	0.11298	1.47785		0	0	0	0
chr1	39665301	39720997	-	Rfx8	ENSMUSG00000057173.8	55696	8	83	12	111		0	83	1	111	8	83	11	111		0.000120482	0.90099	12.8685	0.90087		9.63866	9.90999	0.0400507	0.271328		0	0	0	0
chr1	39900913	40026310	+	Map4k4	ENSMUSG00000026074.15	125397	10049	54475	9502	50983		9225	54475	8802	50983	824	54475	700	50983		16.9344	17.2646	0.0278605	0.330205		1.51262	1.37301	-0.139711	-0.139614		4	0.0318987	11.4309	0.0911576
chr1	40074079	40125231	+	Il1r2	ENSMUSG00000026073.13	51152	38	67	50	122		32	67	46	122	6	67	4	122		47.7613	37.705	-0.341087	-10.0563		8.95536	3.27877	-1.4496	-5.67659		1	0.0195496	2.60353	0.0508979
chr1	40225080	40317257	+	Il1r1	ENSMUSG00000026072.12	92177	38	318	18	183		34	318	13	183	4	318	5	183		10.6919	7.10388	-0.589833	-3.58798		1.25789	2.73229	1.1191	1.4744		1	0.0108487	2.63907	0.0286305
chr1	40324610	40367562	+	Il1rl2	ENSMUSG00000070942.8	42952	155	1280	144	1154		140	1280	124	1154	15	1280	20	1154		10.9375	10.7452	-0.025586	-0.192265		1.17188	1.73311	0.564536	0.561228		0	0	0	0
chr1	40465552	40500854	+	Il18r1	ENSMUSG00000026070.15	35302	185	945	1395	6871		152	945	1188	6871	33	945	207	6871		16.0847	17.2901	0.104257	1.2054		3.49207	3.01266	-0.213045	-0.47941		0	0	0	0
chr1	40515362	40551705	+	Il18rap	ENSMUSG00000026068.11	36343	103	442	114	639		88	442	98	639	15	442	16	639		19.9095	15.3365	-0.376491	-4.57304		3.39369	2.50393	-0.438661	-0.889759		0	0	0	0
chr1	40680574	40769273	+	Slc9a2	ENSMUSG00000026062.12	88699	4	89	4	36		4	89	4	36	0	89	0	36		4.49449	11.1114	1.30581	6.61687		0.000112359	0.000277777	1.30581	0.000165418		4	0.0450963	10.513	0.118525
chr1	40772038	40790687	-	Mfsd9	ENSMUSG00000041945.12	18649	20	76	10	57		6	76	2	57	14	76	8	57		7.89486	3.50894	-1.16988	-4.38592		18.4212	14.0352	-0.39231	-4.38592		2	0.107244	5.73711	0.307636
chr1	42851233	42905683	+	Mrps9	ENSMUSG00000060679.14	54450	1098	9020	1344	9306		952	9020	1204	9306	146	9020	140	9306		10.5543	12.9379	0.293768	2.38357		1.61863	1.50441	-0.105575	-0.11422		2	0.0367309	5.17728	0.0950832
chr1	43047200	43098637	-	Tgfbrap1	ENSMUSG00000070939.9	51437	332	2772	452	3166		42	2772	51	3166	290	2772	401	3166		1.51516	1.61087	0.0883733	0.0957135		10.4618	12.6658	0.275815	2.20406		1	0.0194413	2.69644	0.0524222
chr1	43098710	43115947	+	AI597479	ENSMUSG00000010290.7	17237	236	1583	306	1751		217	1583	272	1751	19	1583	34	1751		13.7082	15.534	0.180394	1.82583		1.20026	1.94175	0.694014	0.741494		1	0.0580147	2.52433	0.146448
chr1	43123074	43196984	-	Fhl2	ENSMUSG00000008136.14	73910	40	743	46	620		8	743	9	620	32	743	37	620		1.07673	1.45163	0.431017	0.374899		4.30688	5.96776	0.470547	1.66088		1	0.01353	2.5817	0.0349303
chr1	43444579	43570515	+	Nck2	ENSMUSG00000066877.11	125936	1464	39777	1351	54534		1072	39777	814	54534	392	39777	537	54534		2.69503	1.49265	-0.852426	-1.20238		0.985494	0.984707	-0.00115317	-0.000787409		1	0.00794054	2.53828	0.0201553
chr1	43730602	43742578	+	1500015O10Rik	ENSMUSG00000026051.8	11976	6	132	14	173		1	132	8	173	5	132	6	173		0.757651	4.62433	2.60964	3.86668		3.78795	3.46826	-0.127204	-0.319688		0	0	0	0
chr1	43746966	43827800	-	Uxs1	ENSMUSG00000057363.12	80834	930	7024	1045	7649		153	7024	170	7649	777	7024	875	7649		2.17825	2.22251	0.0290247	0.0442666		11.0621	11.4394	0.0483901	0.377331		1	0.012371	2.66861	0.0330135
chr1	43933647	44003000	+	Tpp2	ENSMUSG00000041763.14	69353	6995	23717	7766	23573		6397	23717	7188	23573	598	23717	578	23573		26.9722	30.4925	0.176981	3.5203		2.5214	2.45196	-0.0402898	-0.0694404		1	0.014419	3.05914	0.0441097
chr1	44009408	44020034	-	Mettl21c	ENSMUSG00000047343.4	10626	15	200	6	154		11	200	5	154	4	200	1	154		5.50005	3.24682	-0.760418	-2.25323		2.00005	0.649415	-1.62282	-1.35063		0	0	0	0
chr1	44086613	44102441	-	Tex30	ENSMUSG00000026049.11	15828	609	1065	691	1185		53	1065	61	1185	556	1065	630	1185		4.97653	5.14769	0.0487829	0.171153		52.2066	53.1646	0.0262333	0.957984		1	0.0631792	2.69614	0.17034
chr1	44091463	44110790	-	Gm29247	ENSMUSG00000101104.6	19327	73	167	98	199		5	167	6	199	68	167	92	199		2.99407	3.01512	0.0101094	0.021054		40.7186	46.2312	0.183178	5.51258		1	0.0517411	2.69614	0.139501
chr1	44106546	44118808	-	Kdelc1	ENSMUSG00000026047.13	12262	164	326	192	365		11	326	15	365	153	326	177	365		3.37426	4.10962	0.284431	0.735353		46.9325	48.4932	0.0471931	1.56063		0	0	0	0
chr1	44118957	44144770	+	Bivm	ENSMUSG00000041684.11	25813	245	823	314	978		226	823	269	978	19	823	45	978		27.4605	27.5051	0.00234129	0.0446007		2.30864	4.60124	0.994979	2.2926		0	0	0	0
chr1	44147744	44181260	+	Ercc5	ENSMUSG00000026048.16	33516	857	3692	906	3775		753	3692	813	3775	104	3692	93	3775		20.3955	21.5364	0.0785314	1.14097		2.8169	2.46358	-0.193355	-0.353325		0	0	0	0
chr1	45311538	45349706	+	Col3a1	ENSMUSG00000026043.18	38168	368	392	110	116		349	392	104	116	19	392	6	116		89.0306	89.6552	0.0100854	0.624566		4.84696	5.1725	0.0937794	0.325532		0	0	0	0
chr1	45374321	45503282	-	Col5a2	ENSMUSG00000026042.16	128961	70	101	36	48		5	101	4	48	65	101	32	48		4.95059	8.33352	0.751327	3.38294		64.3565	66.6667	0.0508819	2.31027		0	0	0	0
chr1	45795166	45823619	+	Wdr75	ENSMUSG00000025995.16	28453	1588	4324	1808	4488		1450	4324	1674	4488	138	4324	134	4488		33.5338	37.2995	0.15354	3.7657		3.19149	2.98574	-0.0961414	-0.20575		0	0	0	0
chr1	45908068	45926523	-	Slc40a1	ENSMUSG00000025993.10	18455	101	365	122	294		18	365	23	294	83	365	99	294		4.93153	7.82316	0.665715	2.89163		22.7397	33.6735	0.566397	10.9337		0	0	0	0
chr1	46066315	46373546	+	Dnah7b	ENSMUSG00000041144.10	307231	5	83	2	80		5	83	2	80	0	83	0	80		6.02421	2.50012	-1.26877	-3.52409		0.000120482	0.000125	0.0531113	4.51806e-06		0	0	0	0
chr1	46425592	46807476	+	Dnah7c	ENSMUSG00000101337.6	381884	14	167	3	120		12	167	3	120	2	167	0	120		7.18568	2.50008	-1.52315	-4.6856		1.19766	8.33333e-05	-13.811	-1.19758		1	0.0026186	2.53844	0.00664715
chr1	46807544	46892852	-	Slc39a10	ENSMUSG00000025986.6	85308	347	2002	348	1851		37	2002	45	1851	310	2002	303	1851		1.84816	2.43112	0.395536	0.582967		15.4845	16.3695	0.0801867	0.885015		0	0	0	0
chr1	51465862	51478425	-	Nabp1	ENSMUSG00000026107.11	12563	4559	11297	2840	6595		688	11297	380	6595	3871	11297	2460	6595		6.09011	5.76194	-0.0799138	-0.328171		34.2657	37.301	0.122447	3.03525		1	0.0795988	2.90431	0.23118
chr1	51507086	51596718	-	Gm17767	ENSMUSG00000099413.1	89632	8	393	3	197		4	393	2	197	4	393	1	197		1.01784	1.01528	-0.00363062	-0.00255822		1.01784	0.507665	-1.00356	-0.510172		4	0.0446269	10.6659	0.118996
chr1	51749765	51916071	-	Myo1b	ENSMUSG00000018417.14	166306	27	181	10	78		2	181	1	78	25	181	9	78		1.10503	1.28218	0.214515	0.177151		13.8122	11.5386	-0.259478	-2.27363		0	0	0	0
chr1	51987148	52107189	+	Stat4	ENSMUSG00000062939.11	120041	1223	8640	2289	17095		1163	8640	2162	17095	60	8640	127	17095		13.4606	12.647	-0.0899558	-0.813676		0.694446	0.742908	0.0973216	0.0484623		3	0.0249915	7.82318	0.0651709
chr1	52077261	52156087	+	Gm28177	ENSMUSG00000101628.1	78826	55	52	75	73		36	52	41	73	19	52	34	73		69.2308	56.1644	-0.301758	-13.0664		36.5386	46.5754	0.350148	10.0368		1	0.0126862	2.63578	0.033438
chr1	52108121	52113751	-	Gm31812	ENSMUSG00000109599.1	5630	17	422	37	594		14	422	30	594	3	422	7	594		3.31756	5.05052	0.60631	1.73296		0.710924	1.17847	0.729145	0.467544		0	0	0	0
chr1	52119440	52161865	+	Stat1	ENSMUSG00000026104.14	42425	3211	6665	4320	8531		2930	6665	3968	8531	281	6665	352	8531		43.961	46.5127	0.0814014	2.55173		4.21606	4.12613	-0.0311048	-0.0899261		1	0.023571	2.63578	0.062128
chr1	52163448	52233232	-	Gls	ENSMUSG00000026103.14	69784	7605	31996	9300	41075		914	31996	1195	41075	6691	31996	8105	41075		2.85661	2.90931	0.0263755	0.0527051		20.912	19.7322	-0.0837787	-1.17979		2	0.0286599	5.10603	0.0731691
chr1	52457294	52500679	-	Nab1	ENSMUSG00000002881.14	43385	747	8806	507	7366		112	8806	95	7366	635	8806	412	7366		1.27186	1.28971	0.0201064	0.0178496		7.21099	5.59327	-0.366507	-1.61773		0	0	0	0
chr1	52522902	52582679	+	Gm553	ENSMUSG00000100120.1	59777	5	146	6	227		2	146	3	227	3	146	3	227		1.36993	1.32163	-0.0517851	-0.0483012		2.05486	1.32163	-0.636724	-0.733232		0	0	0	0
chr1	52630703	52651919	+	Nemp2	ENSMUSG00000043015.15	21216	465	4316	671	4957		360	4316	531	4957	105	4316	140	4957		8.34106	10.7121	0.360942	2.37107		2.43281	2.82429	0.215265	0.39148		0	0	0	0
chr1	52656286	52727462	-	Mfsd6	ENSMUSG00000041439.15	71176	164	2749	176	2643		81	2749	80	2643	83	2749	96	2643		2.94653	3.02687	0.0388086	0.0803375		3.01928	3.63224	0.266653	0.612956		0	0	0	0
chr1	52785427	52817688	-	Inpp1	ENSMUSG00000026102.9	32261	391	3380	448	4100		59	3380	78	4100	332	3380	370	4100		1.74557	1.90244	0.124158	0.156876		9.82249	9.02439	-0.122259	-0.798095		1	0.0309972	2.66861	0.0827194
chr1	52844929	52920986	+	Hibch	ENSMUSG00000041426.12	76057	732	3274	746	3342		674	3274	680	3342	58	3274	66	3342		20.5864	20.3471	-0.0168713	-0.239341		1.77154	1.97487	0.156755	0.203332		0	0	0	0
chr1	52922324	53020179	-	1700019D03Rik	ENSMUSG00000043629.12	97855	1	69	0	66		0	69	0	66	1	69	0	66		0.000144927	0.000151515	0.0641302	6.5876e-06		1.44942	0.000151515	-13.2237	-1.44927		3	0.0306576	7.89368	0.0806671
chr1	53158577	53187636	-	1700019A02Rik	ENSMUSG00000060715.9	29059	23	318	28	336		6	318	16	336	17	318	12	336		1.88682	4.76193	1.33559	2.87511		5.34594	3.57146	-0.581931	-1.77448		0	0	0	0
chr1	53189187	53297018	-	Pms1	ENSMUSG00000026098.13	107831	403	6299	635	7147		60	6299	68	7147	343	6299	567	7147		0.952534	0.95145	-0.00164301	-0.00108417		5.44531	7.9334	0.542925	2.48809		0	0	0	0
chr1	53297095	53310309	+	Ormdl1	ENSMUSG00000026097.9	13214	149	306	154	295		148	306	152	295	1	306	2	295		48.366	51.5254	0.0912908	3.15941		0.32683	0.678	1.05274	0.35117		0	0	0	0
chr1	53313624	53326343	+	Osgepl1	ENSMUSG00000026096.14	12719	218	656	265	718		183	656	202	718	35	656	63	718		27.8964	28.1337	0.0122236	0.237362		5.33538	8.77439	0.717707	3.43901		0	0	0	0
chr1	53326206	53342186	-	Gm18800	ENSMUSG00000101838.6	15980	3	93	3	84		1	93	1	84	2	93	2	84		1.07538	1.19059	0.146841	0.115219		2.15064	2.38107	0.146841	0.230426		0	0	0	0
chr1	53344617	53352752	-	Asnsd1	ENSMUSG00000026095.15	8135	255	834	265	863		19	834	25	863	236	834	240	863		2.27819	2.89688	0.346614	0.618693		28.2974	27.81	-0.0250656	-0.487397		1	0.122926	2.52433	0.310305
chr1	53397006	53706784	-	Dnah7a	ENSMUSG00000096141.2	309778	7	98	7	96		0	98	0	96	7	98	7	96		0.000102041	0.000104167	0.0297473	2.12585e-06		7.14295	7.29176	0.0297473	0.148811		2	0.00645624	5.07688	0.0163888
chr1	53755506	53785224	-	Stk17b	ENSMUSG00000026094.14	29718	4153	27092	2670	17643		400	27092	271	17643	3753	27092	2399	17643		1.47645	1.53602	0.057064	0.0595695		13.8528	13.5975	-0.0268401	-0.255337		0	0	0	0
chr1	53806876	54195168	-	Hecw2	ENSMUSG00000042807.15	388292	105	1322	41	558		31	1322	17	558	74	1322	24	558		2.34494	3.04661	0.377655	0.701673		5.59759	4.30109	-0.380102	-1.29649		7	0.0180277	18.4783	0.0475887
chr1	54250683	54368727	+	Ccdc150	ENSMUSG00000025983.11	118044	31	365	55	599		26	365	35	599	5	365	20	599		7.12331	5.84309	-0.285818	-1.28023		1.36989	3.33891	1.28532	1.96902		0	0	0	0
chr1	54396004	54438971	-	Gtf3c3	ENSMUSG00000041303.7	42967	1661	6794	1995	7266		168	6794	196	7266	1493	6794	1799	7266		2.47277	2.6975	0.125492	0.224725		21.9753	24.7592	0.172081	2.78388		0	0	0	0
chr1	54472994	54557684	-	Pgap1	ENSMUSG00000073678.4	84690	333	1480	273	1233		46	1480	42	1233	287	1480	231	1233		3.10811	3.40633	0.13218	0.298219		19.3919	18.7348	-0.0497334	-0.657098		1	0.0118078	2.63907	0.0311615
chr1	54645340	54926387	-	Ankrd44	ENSMUSG00000052331.14	281047	5376	60986	5006	56339		878	60986	879	56339	4498	60986	4127	56339		1.43967	1.5602	0.115986	0.120523		7.37546	7.3253	-0.00984608	-0.0501646		6	0.0213487	16.2259	0.0577336
chr1	54681729	54767524	+	4930444A19Rik	ENSMUSG00000101674.6	85795	77	2161	73	2087		26	2161	30	2087	51	2161	43	2087		1.20315	1.43747	0.256719	0.234324		2.36002	2.06038	-0.195892	-0.299645		0	0	0	0
chr1	54985169	55027481	-	Sf3b1	ENSMUSG00000025982.13	42312	32766	47955	35253	48028		825	47955	861	48028	31941	47955	34392	48028		1.72036	1.7927	0.0594246	0.0723414		66.6062	71.6082	0.104469	5.00204		0	0	0	0
chr1	55052770	55072702	+	Coq10b	ENSMUSG00000025981.13	19932	89	699	73	621		84	699	67	621	5	699	6	621		12.0172	10.7891	-0.155529	-1.22812		0.715322	0.9662	0.433729	0.250878		1	0.0501706	2.52433	0.126647
chr1	55077835	55088243	-	Hspd1	ENSMUSG00000025980.14	10408	7202	8766	8946	10561		127	8766	143	10561	7075	8766	8803	10561		1.44878	1.35404	-0.0975693	-0.0947411		80.7096	83.3538	0.0465093	2.64429		1	0.0960799	2.5817	0.24805
chr1	55088132	55091307	+	Hspe1	ENSMUSG00000073676.4	3175	2041	2248	2391	2600		2017	2248	2374	2600	24	2248	17	2600		89.7242	91.3077	0.0252393	1.58349		1.06762	0.65385	-0.707367	-0.41377		1	0.314961	2.78286	0.876491
chr1	55131231	55154899	+	Mob4	ENSMUSG00000025979.13	23668	1715	6524	1182	6372		1559	6524	1042	6372	156	6524	140	6372		23.8964	16.3528	-0.547255	-7.54359		2.39117	2.19711	-0.122109	-0.194059		0	0	0	0
chr1	55170159	55226782	-	Rftn2	ENSMUSG00000025978.14	56623	52	507	57	472		9	507	7	472	43	507	50	472		1.77517	1.48307	-0.259367	-0.292096		8.48128	10.5932	0.32079	2.11196		2	0.0353213	5.12786	0.0905614
chr1	55248658	55363469	-	Boll	ENSMUSG00000025977.15	114811	146	3049	151	2999		33	3049	35	2999	113	3049	116	2999		1.08233	1.16706	0.108743	0.0847337		3.70614	3.86796	0.0616566	0.161823		2	0.0174199	5.33552	0.0464722
chr1	55405921	55754285	+	Plcl1	ENSMUSG00000038349.10	348364	134	4232	119	5112		109	4232	92	5112	25	4232	27	5112		2.57562	1.79969	-0.51717	-0.775928		0.59074	0.528171	-0.161517	-0.0625686		2	0.00574112	5.90453	0.0169493
chr1	56793981	56978650	-	Satb2	ENSMUSG00000038331.15	184669	0	109	0	86		0	109	0	86	0	109	0	86		9.1743e-05	0.000116279	0.341919	2.45359e-05		9.1743e-05	0.000116279	0.341919	2.45359e-05		1	0.00541509	2.69644	0.0146015
chr1	57359222	57377544	-	4930558J18Rik	ENSMUSG00000097519.2	18322	16	191	57	290		5	191	7	290	11	191	50	290		2.61785	2.41383	-0.117061	-0.204025		5.75921	17.2414	1.58193	11.4822		0	0	0	0
chr1	57377620	57385423	+	1700066M21Rik	ENSMUSG00000038323.3	7803	114	646	121	746		63	646	78	746	51	646	43	746		9.75234	10.4558	0.10048	0.70344		7.89475	5.76409	-0.453801	-2.13066		0	0	0	0
chr1	57388237	57407101	-	Tyw5	ENSMUSG00000048495.16	18864	233	1768	213	1746		89	1768	66	1746	144	1768	147	1746		5.03394	3.78007	-0.413274	-1.25387		8.1448	8.41925	0.047812	0.274448		0	0	0	0
chr1	57406328	57417953	+	Maip1	ENSMUSG00000025971.6	11625	295	699	284	654		268	699	261	654	27	699	23	654		38.3405	39.9083	0.0578186	1.56777		3.86267	3.51683	-0.135323	-0.34584		0	0	0	0
chr1	57774162	57948394	+	Spats2l	ENSMUSG00000038305.15	174232	184	2393	57	538		167	2393	53	538	17	2393	4	538		6.97869	9.85132	0.49736	2.87263		0.710409	0.743513	0.0657069	0.0331034		3	0.0172184	7.78731	0.0446951
chr1	57909835	57917111	-	Gm17234	ENSMUSG00000091283.1	7276	16	334	5	78		2	334	1	78	14	334	4	78		0.598832	1.28218	1.09837	0.683346		4.19165	5.12833	0.290971	0.936681		1	0.137438	2.60353	0.357824
chr1	57955101	58018956	-	Kctd18	ENSMUSG00000054770.16	63855	446	1578	360	1323		111	1578	84	1323	335	1578	276	1323		7.03423	6.34921	-0.147814	-0.685013		21.2294	20.8617	-0.0252086	-0.367725		1	0.0156605	2.7337	0.0428111
chr1	57995971	58025899	+	Sgo2a	ENSMUSG00000026039.9	29928	270	1202	396	1740		224	1202	338	1740	46	1202	58	1740		18.6356	19.4253	0.0598739	0.789678		3.82696	3.33334	-0.199232	-0.493624		1	0.0334135	2.7337	0.0913426
chr1	58029931	58106413	+	Aox1	ENSMUSG00000063558.4	76482	16	105	15	57		12	105	11	57	4	105	4	57		11.4287	19.2984	0.755825	7.86973		3.80962	7.01771	0.881354	3.20809		0	0	0	0
chr1	58278326	58380259	+	Aox2	ENSMUSG00000079554.2	101933	30	152	13	102		24	152	9	102	6	152	4	102		15.7895	8.82362	-0.839526	-6.96591		3.94743	3.92166	-0.00944877	-0.0257688		7	0.0686726	18.7115	0.183566
chr1	58392898	58407353	+	Bzw1	ENSMUSG00000051223.14	14455	9978	13782	10197	13765		9647	13782	9904	13765	331	13782	293	13765		69.9971	71.9506	0.0397116	1.9535		2.40168	2.12859	-0.17415	-0.273096		0	0	0	0
chr1	58410189	58424066	-	Clk1	ENSMUSG00000026034.17	13877	7416	15236	6721	14193		868	15236	858	14193	6548	15236	5863	14193		5.69703	6.04523	0.0855872	0.3482		42.9772	41.3091	-0.0571106	-1.66806		1	0.0720617	2.55255	0.183941
chr1	58430994	58445486	-	Ppil3	ENSMUSG00000026035.15	14492	349	1498	498	1473		83	1498	60	1473	266	1498	438	1473		5.54073	4.07333	-0.443868	-1.4674		17.757	29.7352	0.743785	11.9782		0	0	0	0
chr1	58445151	58481816	+	Nif3l1	ENSMUSG00000026036.17	36665	186	707	175	697		179	707	157	697	7	707	18	697		25.3183	22.5251	-0.168643	-2.79314		0.990113	2.58251	1.38311	1.5924		1	0.027274	2.51312	0.0685428
chr1	58462771	58505109	-	Orc2	ENSMUSG00000026037.14	42338	1759	4793	2039	5077		106	4793	74	5077	1653	4793	1965	5077		2.21156	1.45756	-0.601514	-0.754005		34.4878	38.704	0.166395	4.21616		2	0.0472389	5.89683	0.13928
chr1	58505148	58523230	+	Gm15834	ENSMUSG00000085054.2	18082	42	559	51	683		26	559	25	683	16	559	26	683		4.65118	3.66034	-0.345621	-0.990844		2.86227	3.80675	0.411399	0.944478		0	0	0	0
chr1	58522806	58586323	-	Fam126b	ENSMUSG00000038174.14	63517	601	4576	757	5052		93	4576	117	5052	508	4576	640	5052		2.03234	2.31592	0.188438	0.283572		11.1014	12.6683	0.190476	1.56685		0	0	0	0
chr1	58586384	58595964	+	Ndufb3	ENSMUSG00000026032.8	9580	1891	2820	1948	2765		1853	2820	1903	2765	38	2820	45	2765		65.7092	68.8246	0.0668284	3.11537		1.34752	1.62749	0.272341	0.279969		0	0	0	0
chr1	58646903	58695989	-	Als2cr12	ENSMUSG00000047528.13	49086	9	80	15	76		6	80	6	76	3	80	9	76		7.50012	7.89486	0.0740005	0.394742		3.75012	11.8422	1.65893	8.0921		2	0.0407448	5.25117	0.106979
chr1	58652641	58655831	+	Gm20257	ENSMUSG00000102059.1	3190	27	167	30	217		20	167	25	217	7	167	5	217		11.9761	11.5208	-0.0559201	-0.455323		4.19167	2.30419	-0.863265	-1.88748		0	0	0	0
chr1	58711508	58758884	+	Cflar	ENSMUSG00000026031.15	47376	2087	17186	2149	18074		1738	17186	1729	18074	349	17186	420	18074		10.1129	9.56623	-0.0801722	-0.546655		2.03072	2.32378	0.19448	0.293057		1	0.0211077	2.75382	0.0581269
chr1	58795374	58847503	+	Casp8	ENSMUSG00000026029.14	52129	2178	11002	2676	13655		1984	11002	2459	13655	194	11002	217	13655		18.0331	18.0081	-0.00200381	-0.0250294		1.76332	1.58916	-0.150025	-0.174154		1	0.0191832	2.53844	0.0486954
chr1	58850085	58892792	-	Gm28802	ENSMUSG00000099719.1	42707	37	265	32	313		17	265	16	313	20	265	16	313		6.41513	5.11185	-0.327633	-1.30328		7.5472	5.11185	-0.562097	-2.43535		0	0	0	0
chr1	58900449	58973430	-	Trak2	ENSMUSG00000026028.12	72981	2112	11676	1947	11151		147	11676	152	11151	1965	11676	1795	11151		1.25899	1.36311	0.114628	0.104114		16.8294	16.0972	-0.0641724	-0.732183		0	0	0	0
chr1	58973522	58995715	+	Stradb	ENSMUSG00000026027.13	22193	707	1899	790	1859		629	1899	712	1859	78	1899	78	1859		33.1227	38.3002	0.20953	5.17747		4.10743	4.19581	0.0307131	0.0883793		0	0	0	0
chr1	59100590	59120408	-	Tmem237	ENSMUSG00000038079.14	19818	181	363	189	384		17	363	24	384	164	363	165	384		4.68322	6.25002	0.41636	1.5668		45.1791	42.9688	-0.0723665	-2.21031		2	0.100918	5.70928	0.288086
chr1	59120935	59163389	-	Mpp4	ENSMUSG00000079550.9	42454	296	1254	506	1825		99	1254	136	1825	197	1254	370	1825		7.89474	7.45206	-0.0832533	-0.442684		15.7097	20.274	0.36797	4.56424		2	0.0471098	5.08917	0.119875
chr1	59162926	59237231	-	Als2	ENSMUSG00000026024.14	74305	3043	8528	3258	9130		238	8528	278	9130	2805	8528	2980	9130		2.79081	3.04491	0.125716	0.2541		32.8917	32.6397	-0.0110959	-0.252002		2	0.0269161	5.83293	0.0784998
chr1	59256906	59352993	+	Cdk15	ENSMUSG00000026023.16	96087	19	220	5	43		15	220	3	43	4	220	2	43		6.81822	6.97696	0.0332026	0.158736		1.81823	4.65138	1.35513	2.83316		2	0.0208145	5.45788	0.0568014
chr1	59516264	59636417	+	Gm973	ENSMUSG00000047361.16	120153	19	226	16	285		11	226	13	285	8	226	3	285		4.8673	4.56144	-0.0936329	-0.305862		3.53987	1.05267	-1.74965	-2.4872		2	0.0166454	5.06972	0.0421939
chr1	59586558	59670834	-	Sumo1	ENSMUSG00000026021.15	84276	370	3621	1109	4114		11	3621	30	4114	359	3621	1079	4114		0.303786	0.72922	1.2633	0.425433		9.91439	26.2275	1.40349	16.3131		1	0.0118658	2.52433	0.0299531
chr1	59684971	59719044	+	Nop58	ENSMUSG00000026020.9	34073	4062	8586	5085	10897		3834	8586	4833	10897	228	8586	252	10897		44.6541	44.3517	-0.00980428	-0.302432		2.65549	2.31256	-0.199483	-0.342923		1	0.0293488	2.53844	0.0745
chr1	59763400	59879014	+	Bmpr2	ENSMUSG00000067336.6	115614	78	650	141	917		71	650	121	917	7	650	20	917		10.9231	13.1952	0.272633	2.27212		1.07694	2.18104	1.01808	1.1041		0	0	0	0
chr1	59913006	59985346	+	Fam117b	ENSMUSG00000041040.12	72340	282	1814	374	1951		255	1814	329	1951	27	1814	45	1951		14.0573	16.8632	0.262551	2.80581		1.48843	2.30651	0.631924	0.818086		1	0.0138236	2.81119	0.0388608
chr1	59982490	60043184	-	Ica1l	ENSMUSG00000026018.12	60694	320	2751	401	2977		247	2751	296	2977	73	2751	105	2977		8.97856	9.9429	0.147183	0.964342		2.65358	3.52704	0.410517	0.87346		0	0	0	0
chr1	60069785	60098645	-	Wdr12	ENSMUSG00000026019.15	28860	4137	8913	2871	6827		347	8913	237	6827	3790	8913	2634	6827		3.89319	3.47151	-0.165389	-0.421679		42.5222	38.5821	-0.140283	-3.94006		0	0	0	0
chr1	60098247	60153953	+	Carf	ENSMUSG00000026017.13	55706	457	2017	628	2431		399	2017	556	2431	58	2017	72	2431		19.7819	22.8712	0.209357	3.08939		2.87556	2.96175	0.0426047	0.0861856		1	0.0179514	2.56606	0.0460643
chr1	60180599	60338328	+	Nbeal1	ENSMUSG00000073664.11	157729	2914	9917	4732	15312		2648	9917	4301	15312	266	9917	431	15312		26.7016	28.0891	0.0730819	1.38746		2.68226	2.81479	0.0695743	0.132523		0	0	0	0
chr1	60343323	60388060	+	Cyp20a1	ENSMUSG00000049439.13	44737	213	715	250	817		205	715	244	817	8	715	6	817		28.6713	29.8654	0.0588643	1.19403		1.11889	0.734406	-0.607424	-0.384489		1	0.0223529	2.54475	0.0568824
chr1	60409619	60481158	+	Abi2	ENSMUSG00000026782.15	71539	258	2819	303	2227		226	2819	282	2227	32	2819	21	2227		8.01703	12.6628	0.659454	4.64575		1.13516	0.942977	-0.267598	-0.192181		0	0	0	0
chr1	60482292	60567104	-	Raph1	ENSMUSG00000026014.15	84812	139	1301	129	884		35	1301	30	884	104	1301	99	884		2.69025	3.39368	0.335111	0.70343		7.99386	11.1991	0.48642	3.20525		0	0	0	0
chr1	60716800	60773359	+	Cd28	ENSMUSG00000026012.2	56559	1612	30526	1674	18756		1112	30526	1326	18756	500	30526	348	18756		3.6428	7.06974	0.95661	3.42694		1.63795	1.85541	0.179846	0.217458		2	0.0353613	5.33963	0.0944081
chr1	60778843	60803790	+	2310016D23Rik	ENSMUSG00000085965.1	24947	20	213	10	146		18	213	8	146	2	213	2	146		8.45075	5.47952	-0.62503	-2.97123		0.939014	1.36993	0.544885	0.430917		0	0	0	0
chr1	60887000	60915832	+	Ctla4	ENSMUSG00000026011.13	28832	108	557	228	1096		98	557	204	1096	10	557	24	1096		17.5943	18.6131	0.0812163	1.01888		1.79535	2.18979	0.286528	0.39444		0	0	0	0
chr1	60977927	61000320	+	Icos	ENSMUSG00000026009.14	22393	219	599	45	227		183	599	41	227	36	599	4	227		30.5509	18.0617	-0.758282	-12.4892		6.01003	1.76216	-1.77003	-4.24787		0	0	0	0
chr1	61638824	62642284	+	Pard3b	ENSMUSG00000052062.14	1003460	32	683	14	311		27	683	14	311	5	683	0	311		3.95316	4.50164	0.187443	0.548476		0.732079	3.21543e-05	-14.4747	-0.732047		2	0.0019931	5.41229	0.00539363
chr1	61767415	61851540	-	Pard3bos1	ENSMUSG00000085842.7	84125	4	168	0	93		2	168	0	93	2	168	0	93		1.19054	0.000107527	-13.4346	-1.19043		1.19054	0.000107527	-13.4346	-1.19043		0	0	0	0
chr1	62703285	62818695	+	Nrp2	ENSMUSG00000025969.15	115410	38	311	21	182		33	311	16	182	5	311	5	182		10.611	8.79126	-0.271414	-1.8197		1.60775	2.74731	0.772976	1.13956		2	0.0173295	5.38049	0.0466207
chr1	62958418	63114667	-	Ino80d	ENSMUSG00000040865.15	156249	642	6223	837	7071		176	6223	175	7071	466	6223	662	7071		2.82822	2.4749	-0.192525	-0.353321		7.48835	9.36218	0.322197	1.87383		2	0.0128001	5.12786	0.0328185
chr1	63113078	63158290	+	Ino80dos	ENSMUSG00000084799.7	45212	9	103	13	122		0	103	1	122	9	103	12	122		9.70873e-05	0.819753	13.0436	0.819656		8.73795	9.83614	0.170797	1.09819		0	0	0	0
chr1	63143596	63176833	-	Ndufs1	ENSMUSG00000025968.16	33237	3346	7098	4243	7728		268	7098	274	7728	3078	7098	3969	7728		3.77571	3.54555	-0.0907396	-0.230163		43.3643	51.3587	0.2441	7.99437		0	0	0	0
chr1	63176825	63180486	+	Eef1b2	ENSMUSG00000025967.16	3661	6284	3927	6471	4044		3259	3927	3389	4044	3025	3927	3082	4044		82.9896	83.8032	0.0140749	0.813606		77.0308	76.2117	-0.0154237	-0.819141		0	0	0	0
chr1	63445891	63596276	+	Adam23	ENSMUSG00000025964.15	150385	208	1255	224	1065		196	1255	210	1065	12	1255	14	1065		15.6175	19.7183	0.33637	4.10078		0.956183	1.31456	0.459225	0.35838		1	0.0066496	2.53844	0.0168796
chr1	63730614	63754655	+	Fastkd2	ENSMUSG00000025962.15	24041	581	1420	572	1666		517	1420	519	1666	64	1420	53	1666		36.4085	31.1525	-0.224927	-5.25599		4.50705	3.18128	-0.502577	-1.32577		1	0.0415956	2.52433	0.105001
chr1	64029447	64122282	-	Klf7	ENSMUSG00000025959.13	92835	193	689	135	470		51	689	23	470	142	689	112	470		7.40205	4.89364	-0.597017	-2.50841		20.6096	23.8298	0.209451	3.22021		2	0.0215436	5.97302	0.0643402
chr1	64029463	64032927	+	Gm26649	ENSMUSG00000097272.1	3464	56	177	56	129		26	177	22	129	30	177	34	129		14.6893	17.0543	0.215371	2.36501		16.9492	26.3566	0.63695	9.40745		0	0	0	0
chr1	64078654	64090782	+	Gm13748	ENSMUSG00000086836.1	12128	91	2653	45	1546		64	2653	28	1546	27	2653	17	1546		2.41237	1.81113	-0.413558	-0.601235		1.01772	1.09962	0.111663	0.0818988		0	0	0	0
chr1	64185991	64303043	-	Gm28981	ENSMUSG00000101895.1	117052	2	143	0	122		0	143	0	122	2	143	0	122		6.993e-05	8.19671e-05	0.229134	1.20371e-05		1.39867	8.19671e-05	-14.0587	-1.39859		0	0	0	0
chr1	64532645	64604548	+	Creb1	ENSMUSG00000025958.14	71903	3873	40486	4100	40243		2626	40486	2873	40243	1247	40486	1227	40243		6.48619	7.13913	0.138376	0.652937		3.08008	3.04898	-0.014641	-0.0310996		0	0	0	0
chr1	64606473	64617242	-	Mettl21a	ENSMUSG00000025956.10	10769	65	600	66	584		15	600	16	584	50	600	50	584		2.50002	2.73974	0.132103	0.239726		8.33335	8.56166	0.0389941	0.228311		1	0.0928591	2.53844	0.235717
chr1	64617784	64626033	+	Gm28982	ENSMUSG00000101832.1	8249	11	155	7	211		2	155	2	211	9	155	5	211		1.29039	0.947914	-0.444975	-0.342472		5.80651	2.36971	-1.29296	-3.4368		0	0	0	0
chr1	64679871	64690659	-	2810408I11Rik	ENSMUSG00000087213.2	10788	11	89	13	170		4	89	8	170	7	89	5	170		4.49449	4.70594	0.0663252	0.211449		7.86527	2.94123	-1.41908	-4.92404		0	0	0	0
chr1	64690455	64725644	+	Ccnyl1	ENSMUSG00000070871.10	35189	194	2185	325	3077		166	2185	279	3077	28	2185	46	3077		7.59726	9.06728	0.25519	1.47002		1.28147	1.49497	0.222314	0.213497		0	0	0	0
chr1	64785983	64956824	-	Plekhm3	ENSMUSG00000051344.13	170841	69	4440	78	6222		15	4440	20	6222	54	4440	58	6222		0.33784	0.321442	-0.0717836	-0.0163984		1.21622	0.932178	-0.383725	-0.284041		4	0.0234136	11.1353	0.065179
chr1	65158616	65186500	-	Idh1	ENSMUSG00000025950.16	27884	605	1835	570	1681		32	1835	38	1681	573	1835	532	1681		1.74387	2.26057	0.374387	0.51669		31.2262	31.6478	0.0193515	0.421671		0	0	0	0
chr1	65186683	65278695	+	Pikfyve	ENSMUSG00000025949.16	92012	3250	9840	3250	9343		2868	9840	2923	9343	382	9840	327	9343		29.1463	31.2855	0.102177	2.13911		3.88211	3.49995	-0.149509	-0.382167		1	0.0108681	2.53844	0.0275881
chr1	66175273	66442583	+	Map2	ENSMUSG00000015222.17	267310	22	275	9	108		18	275	7	108	4	275	2	108		6.54549	6.48157	-0.014158	-0.0639205		1.45458	1.85194	0.348436	0.397361		0	0	0	0
chr1	66468367	66699148	+	Unc80	ENSMUSG00000055567.18	230781	5	61	1	38		1	61	0	38	4	61	1	38		1.63951	0.000263157	-12.605	-1.63924		6.55753	2.63184	-1.31708	-3.9257		0	0	0	0
chr1	66700831	66719805	+	Rpe	ENSMUSG00000026005.15	18974	1664	5309	1244	4850		1452	5309	1031	4850	212	5309	213	4850		27.3498	21.2577	-0.363542	-6.09205		3.99322	4.39175	0.137245	0.398534		1	0.0527037	2.5817	0.136065
chr1	66719248	66817562	-	Kansl1l	ENSMUSG00000026004.15	98314	2815	33799	2811	31015		758	33799	721	31015	2057	33799	2090	31015		2.24267	2.32468	0.0518159	0.0820117		6.08598	6.73868	0.146976	0.652696		1	0.0101715	2.63907	0.0268433
chr1	66783913	66786445	+	Gm15789	ENSMUSG00000082057.1	2532	106	780	112	793		36	780	28	793	70	780	84	793		4.6154	3.53091	-0.386416	-1.08449		8.97437	10.5927	0.239187	1.61833		0	0	0	0
chr1	66830839	66863277	-	Acadl	ENSMUSG00000026003.5	32438	776	2067	1528	4982		35	2067	91	4982	741	2067	1437	4982		1.69328	1.82658	0.109322	0.133298		35.8491	28.8438	-0.313672	-7.00522		1	0.030828	2.60353	0.0802617
chr1	67000517	67038872	-	Lancl1	ENSMUSG00000026000.16	38355	1112	3603	1158	3897		31	3603	34	3897	1081	3603	1124	3897		0.860397	0.872469	0.0201008	0.0120717		30.0028	28.8427	-0.0568898	-1.16008		0	0	0	0
chr1	69513932	69547707	+	Gm29114	ENSMUSG00000101156.1	33775	14	203	35	342		9	203	27	342	5	203	8	342		4.43354	7.89476	0.832436	3.46122		2.4631	2.33921	-0.0744552	-0.123892		0	0	0	0
chr1	69531214	69687245	-	Ikzf2	ENSMUSG00000025997.13	156031	1076	11415	1994	18439		172	11415	244	18439	904	11415	1750	18439		1.50679	1.32328	-0.187357	-0.183507		7.91941	9.49075	0.261131	1.57135		2	0.012818	5.12786	0.0328644
chr1	69826970	70725132	+	Spag16	ENSMUSG00000053153.14	898162	13	76	4	34		12	76	4	34	1	76	0	34		15.7896	11.765	-0.424476	-4.02462		1.31592	0.000294117	-12.1274	-1.31563		0	0	0	0
chr1	71027498	71103146	-	Bard1	ENSMUSG00000026196.7	75648	758	8722	1128	11824		120	8722	132	11824	638	8722	996	11824		1.37583	1.11637	-0.301484	-0.259458		7.31484	8.42355	0.203602	1.10871		0	0	0	0
chr1	71557150	71579631	+	Atic	ENSMUSG00000026192.13	22481	2915	5498	3796	6286		2839	5498	3702	6286	76	5498	94	6286		51.637	58.8928	0.189687	7.25582		1.38232	1.49539	0.113426	0.113066		2	0.088964	5.75558	0.25602
chr1	71585520	71653200	-	Fn1	ENSMUSG00000026193.15	67680	124	214	63	103		9	214	4	103	115	214	59	103		4.20565	3.88359	-0.114939	-0.322064		53.7383	57.2816	0.0921199	3.54326		0	0	0	0
chr1	72159442	72212307	-	Mreg	ENSMUSG00000039395.8	52865	40	1116	22	316		3	1116	0	316	37	1116	22	316		0.268826	3.16456e-05	-13.0524	-0.268794		3.31542	6.96205	1.07032	3.64663		0	0	0	0
chr1	72236465	72274869	+	D230017M19Rik	ENSMUSG00000097131.1	38404	7	50	9	48		5	50	6	48	2	50	3	48		10.0002	12.5002	0.321923	2.5		4.00019	6.2502	0.643832	2.25		2	0.0520779	5.42846	0.141351
chr1	72259167	72284314	-	Pecr	ENSMUSG00000026189.13	25147	22	145	47	218		3	145	11	218	19	145	36	218		2.06903	5.04592	1.28616	2.97688		13.1035	16.5138	0.333719	3.41029		1	0.0397662	2.56458	0.101984
chr1	72307421	72394952	+	Xrcc5	ENSMUSG00000026187.8	87531	1909	7176	2205	8335		1799	7176	2082	8335	110	7176	123	8335		25.0697	24.979	-0.00522744	-0.0906726		1.53289	1.47571	-0.0548477	-0.0571827		1	0.0114245	2.69644	0.0308055
chr1	72583251	72633134	+	Smarcal1	ENSMUSG00000039354.16	49883	1271	4436	1433	4891		1146	4436	1296	4891	125	4436	137	4891		25.8341	26.4977	0.0365886	0.663564		2.81786	2.80107	-0.0086224	-0.0167909		1	0.0200469	2.81119	0.0563557
chr1	72711290	72713813	+	Rpl37a	ENSMUSG00000046330.10	2523	7770	19538	7007	19691		7609	19538	6842	19691	161	19538	165	19691		38.9446	34.7468	-0.164542	-4.19778		0.824036	0.837947	0.0241517	0.0139111		0	0	0	0
chr1	73618088	73864466	-	6030407O03Rik	ENSMUSG00000100301.6	246378	1	162	1	23		0	162	1	23	1	162	0	23		6.17284e-05	4.34824	16.1041	4.34818		0.617345	0.000434781	-10.4716	-0.616911		4	0.0162352	10.4267	0.0423199
chr1	73910231	74124449	-	Tns1	ENSMUSG00000055322.15	214218	1076	10496	807	7776		165	10496	134	7776	911	10496	673	7776		1.57203	1.72325	0.132507	0.151224		8.6795	8.65484	-0.004105	-0.0246613		2	0.00933628	5.97666	0.0278999
chr1	74125541	74148223	+	Rufy4	ENSMUSG00000061815.11	22682	28	116	14	76		22	116	13	76	6	116	1	76		18.9656	17.1054	-0.148935	-1.86021		5.1725	1.31592	-1.97479	-3.85658		0	0	0	0
chr1	74236084	74268209	+	Arpc2	ENSMUSG00000006304.14	32125	9829	25289	9467	22733		9435	25289	9129	22733	394	25289	338	22733		37.3087	40.1575	0.106156	2.84877		1.55799	1.48683	-0.0674504	-0.0711643		0	0	0	0
chr1	74279840	74284738	-	Aamp	ENSMUSG00000006299.13	4898	1947	2903	2129	2975		143	2903	173	2975	1804	2903	1956	2975		4.92594	5.81513	0.239412	0.889187		62.1426	65.7479	0.0813619	3.60529		0	0	0	0
chr1	74284930	74353694	+	Pnkd	ENSMUSG00000026179.14	68764	271	614	354	807		220	614	301	807	51	614	53	807		35.8306	37.2986	0.0579298	1.46802		8.3062	6.56755	-0.338835	-1.73866		4	0.05817	10.6669	0.155123
chr1	74288247	74305622	-	Tmbim1	ENSMUSG00000006301.17	17375	220	649	287	700		79	649	121	700	141	649	166	700		12.1726	17.2857	0.505945	5.11314		21.7257	23.7143	0.126351	1.98855		0	0	0	0
chr1	74375195	74386062	+	Slc11a1	ENSMUSG00000026177.11	10867	51	85	55	91		43	85	51	91	8	85	4	91		50.5883	56.044	0.147756	5.45571		9.41187	4.39571	-1.09839	-5.01616		1	0.0920217	2.5817	0.237572
chr1	74391509	74397285	+	Ctdsp1	ENSMUSG00000026176.13	5776	1020	1641	1242	1944		881	1641	1090	1944	139	1641	152	1944		53.6868	56.07	0.0626612	2.38318		8.47045	7.81893	-0.115467	-0.651516		0	0	0	0
chr1	74409376	74435559	+	Vil1	ENSMUSG00000026175.12	26183	25	149	14	156		19	149	9	156	6	149	5	156		12.7517	5.76929	-1.14423	-6.98245		4.02691	3.20519	-0.329263	-0.82172		2	0.0763854	5.23053	0.199768
chr1	74435511	74544284	-	Usp37	ENSMUSG00000033364.13	108773	2406	7949	2876	8423		177	7949	179	8423	2229	7949	2697	8423		2.2267	2.12513	-0.0673506	-0.101562		28.0413	32.0195	0.191398	3.97821		1	0.00919346	3.04067	0.0279543
chr1	74506058	74530842	+	Cnot9	ENSMUSG00000026174.9	24784	1086	2506	1420	3073		984	2506	1322	3073	102	2506	98	3073		39.2658	43.0199	0.131731	3.75409		4.07024	3.18907	-0.351977	-0.881166		0	0	0	0
chr1	74542888	74567794	+	Plcd4	ENSMUSG00000026173.15	24906	48	150	35	170		31	150	21	170	17	150	14	170		20.6667	12.353	-0.742449	-8.31373		11.3334	8.23535	-0.460678	-3.09804		1	0.040151	2.8521	0.114515
chr1	74565127	74588246	-	Zfp142	ENSMUSG00000026135.17	23119	224	1292	266	1300		42	1292	37	1300	182	1292	229	1300		3.25078	2.84616	-0.191769	-0.40462		14.0867	17.6154	0.322503	3.5287		0	0	0	0
chr1	74588289	74592443	+	Bcs1l	ENSMUSG00000026172.12	4154	342	561	394	616		264	561	319	616	78	561	75	616		47.0588	51.7857	0.138089	4.72689		13.9038	12.1753	-0.191513	-1.72842		0	0	0	0
chr1	74593748	74601397	-	Rnf25	ENSMUSG00000026171.12	7649	889	1864	826	1742		100	1864	95	1742	789	1864	731	1742		5.36481	5.45351	0.0236567	0.0886952		42.3283	41.9633	-0.0124966	-0.365065		0	0	0	0
chr1	74661745	74703730	+	Ttll4	ENSMUSG00000033257.14	41985	2026	8085	2223	8586		1743	8085	1942	8586	283	8085	281	8586		21.5584	22.6182	0.0692322	1.05977		3.50031	3.27277	-0.0969703	-0.22754		2	0.0476361	5.67747	0.135226
chr1	74713574	74737892	+	Cyp27a1	ENSMUSG00000026170.6	24318	30	127	30	160		26	127	25	160	4	127	5	160		20.4725	15.6251	-0.389826	-4.84745		3.14968	3.12506	-0.0113223	-0.024622		2	0.0822436	5.39289	0.221765
chr1	74967139	75125200	-	Nhej1	ENSMUSG00000026162.7	158061	172	2854	184	2877		43	2854	27	2877	129	2854	157	2877		1.50666	0.938481	-0.682955	-0.56818		4.51998	5.45708	0.271813	0.937101		1	0.00632667	2.63907	0.0166965
chr1	75125541	75133890	-	Slc23a3	ENSMUSG00000026205.8	8349	32	80	25	59		12	80	6	59	20	80	19	59		15.0001	10.1696	-0.560704	-4.83046		25.0001	32.2035	0.365284	7.20341		0	0	0	0
chr1	75134554	75142711	-	Cnppd1	ENSMUSG00000033159.14	8157	1897	2053	1817	1989		277	2053	234	1989	1620	2053	1583	1989		13.4925	11.7647	-0.197687	-1.72774		78.9089	79.5877	0.0123578	0.678819		0	0	0	0
chr1	75142778	75147913	+	Retreg2	ENSMUSG00000049339.16	5135	1055	1339	1132	1432		977	1339	1040	1432	78	1339	92	1432		72.9649	72.6257	-0.00672247	-0.339201		5.82525	6.42459	0.141284	0.599338		0	0	0	0
chr1	75168646	75171629	+	Zfand2b	ENSMUSG00000026197.12	2983	563	873	547	896		530	873	516	896	33	873	31	896		60.7102	57.5893	-0.0761384	-3.12091		3.78008	3.45983	-0.127715	-0.320248		0	0	0	0
chr1	75171731	75185146	-	Gm29253	ENSMUSG00000099519.1	13415	63	76	46	55		3	76	4	55	60	76	42	55		3.94749	7.2729	0.881593	3.3254		78.9474	76.3637	-0.0480051	-2.58372		0	0	0	0
chr1	75180860	75192196	-	Atg9a	ENSMUSG00000033124.15	11336	678	1299	542	1056		137	1299	92	1056	541	1299	450	1056		10.5466	8.71213	-0.275678	-1.83445		41.6474	42.6136	0.033088	0.966216		1	0.0882145	2.69644	0.237865
chr1	75192151	75199387	+	Ankzf1	ENSMUSG00000026199.17	7236	366	624	351	609		308	624	297	609	58	624	54	609		49.359	48.7685	-0.0173636	-0.590501		9.29489	8.86701	-0.0679895	-0.427876		1	0.138198	2.69644	0.372642
chr1	75198236	75210813	-	Glb1l	ENSMUSG00000026200.13	12577	278	615	337	755		49	615	55	755	229	615	282	755		7.96749	7.28478	-0.129241	-0.682714		37.2358	37.351	0.00445726	0.115219		0	0	0	0
chr1	75210838	75215606	+	Stk16	ENSMUSG00000026201.12	4768	913	905	902	882		834	905	838	882	79	905	64	882		92.1547	95.0113	0.044042	2.85664		8.72929	7.25625	-0.266641	-1.47305		0	0	0	0
chr1	75214228	75219865	-	Tuba4a	ENSMUSG00000026202.13	5637	1575	2804	1095	1305		135	2804	93	1305	1440	2804	1002	1305		4.81455	7.12644	0.56578	2.31189		51.3552	76.7816	0.58025	25.4264		0	0	0	0
chr1	75220095	75232102	-	A630095N17Rik	ENSMUSG00000096094.2	12007	19	54	3	16		9	54	3	16	10	54	0	16		16.6668	18.7505	0.169951	2.08369		18.5187	0.000624996	-14.8548	-18.518		0	0	0	0
chr1	75236406	75245692	+	Dnajb2	ENSMUSG00000026203.16	9286	120	329	90	283		103	329	84	283	17	329	6	283		31.307	29.682	-0.0768973	-1.62501		5.1672	2.12018	-1.2852	-3.04703		3	0.323067	8.10103	0.872392
chr1	75247027	75264502	-	Ptprn	ENSMUSG00000026204.15	17475	67	99	32	61		20	99	7	61	47	99	25	61		20.2021	11.4756	-0.815941	-8.72655		47.4748	40.9837	-0.212112	-6.4911		2	0.114449	5.58347	0.319512
chr1	75307896	75317990	-	Dnpep	ENSMUSG00000026209.15	10094	1204	1889	1371	2056		56	1889	66	2056	1148	1889	1305	2056		2.96454	3.21012	0.114821	0.245585		60.7729	63.4728	0.0627096	2.69987		2	0.198138	5.13131	0.508352
chr1	75435930	75443179	+	Gmppa	ENSMUSG00000033021.16	7249	534	1106	618	1273		483	1106	552	1273	51	1106	66	1273		43.6709	43.3621	-0.010236	-0.30875		4.61122	5.18461	0.169087	0.573391		0	0	0	0
chr1	75474569	75479307	-	Chpf	ENSMUSG00000032997.16	4738	55	64	44	53		3	64	1	53	52	64	43	53		4.68765	1.88698	-1.31279	-2.80067		81.25	81.1321	-0.00209531	-0.117918		0	0	0	0
chr1	75521529	75537335	+	Stk11ip	ENSMUSG00000026213.15	15806	1174	1719	1160	1850		1012	1719	1021	1850	162	1719	139	1850		58.8714	55.1892	-0.0931821	-3.68225		9.42409	7.51352	-0.326865	-1.91057		0	0	0	0
chr1	78310345	78420289	+	Sgpp2	ENSMUSG00000032908.9	109944	7	266	6	225		7	266	6	225	0	266	0	225		2.63162	2.66671	0.0191122	0.0350944		3.7594e-05	4.44444e-05	0.241501	6.85045e-06		0	0	0	0
chr1	78417975	78488897	-	Farsb	ENSMUSG00000026245.16	70922	3146	9764	3627	10014		208	9764	177	10014	2938	9764	3450	10014		2.13028	1.76753	-0.269308	-0.362749		30.0901	34.4518	0.195288	4.36164		0	0	0	0
chr1	78657825	78707743	+	Acsl3	ENSMUSG00000032883.15	49918	1002	3943	1076	3642		906	3943	1011	3642	96	3943	65	3642		22.9774	27.7595	0.272763	4.78204		2.4347	1.78474	-0.448031	-0.649961		0	0	0	0
chr1	78658038	78671512	+	Utp14b	ENSMUSG00000079470.8	13474	114	590	126	620		77	590	104	620	37	590	22	620		13.0509	16.7742	0.362099	3.72334		6.2712	3.5484	-0.821572	-2.7228		0	0	0	0
chr1	79606876	79671972	-	Ap1s3	ENSMUSG00000054702.14	65096	31	3790	66	4097		6	3790	12	4097	25	3790	54	4097		0.158314	0.2929	0.887618	0.134586		0.659633	1.31804	0.998658	0.658407		0	0	0	0
chr1	79702262	79776143	-	Wdfy1	ENSMUSG00000073643.11	73881	148	1198	318	1549		17	1198	29	1549	131	1198	289	1549		1.41904	1.87218	0.399805	0.453142		10.9349	18.6572	0.770793	7.7223		1	0.0135353	2.51101	0.0339872
chr1	79776018	79781445	+	Mrpl44	ENSMUSG00000026248.9	5427	316	534	385	645		303	534	371	645	13	534	14	645		56.7416	57.5194	0.0196419	0.777805		2.43448	2.17056	-0.165545	-0.263917		0	0	0	0
chr1	79794197	79861180	-	Serpine2	ENSMUSG00000026249.10	66983	35	203	1019	4370		1	203	31	4370	34	203	988	4370		0.49266	0.709384	0.525976	0.216725		16.7488	22.6087	0.432819	5.85989		1	0.0149292	2.63907	0.0393991
chr1	80198706	80218473	-	Fam124b	ENSMUSG00000043230.2	19767	5	68	8	273		3	68	0	273	2	68	8	273		4.41191	3.663e-05	-16.878	-4.41187		2.94132	2.93044	-0.00534681	-0.0108807		1	0.0505894	2.52433	0.127704
chr1	80264923	80340480	-	Cul3	ENSMUSG00000004364.14	75557	7036	31612	6869	32405		508	31612	522	32405	6528	31612	6347	32405		1.60699	1.61086	0.00347718	0.00387782		20.6504	19.5865	-0.0763103	-1.0639		0	0	0	0
chr1	80445932	80479867	+	1700016L21Rik	ENSMUSG00000101483.1	33935	11	151	3	15		7	151	2	15	4	151	1	15		4.63582	13.3339	1.5242	8.69809		2.64907	6.66729	1.33161	4.01822		0	0	0	0
chr1	80449597	80461448	-	Gm45261	ENSMUSG00000110100.1	11851	3	174	0	17		2	174	0	17	1	174	0	17		1.14948	0.000588232	-10.9323	-1.14889		0.57477	0.000588232	-9.93238	-0.574182		0	0	0	0
chr1	80501073	80758527	-	Dock10	ENSMUSG00000038608.15	257454	15996	55979	14087	48446		1189	55979	1044	48446	14807	55979	13043	48446		2.12401	2.15498	0.0208812	0.0309659		26.451	26.9228	0.0255045	0.471769		1	0.00388419	2.52433	0.00980497
chr1	82316452	82445366	+	Rhbdd1	ENSMUSG00000026142.15	128914	135	2233	196	2884		112	2233	160	2884	23	2233	36	2884		5.01568	5.54785	0.145485	0.532175		1.03001	1.24827	0.277273	0.218261		0	0	0	0
chr1	82392493	82402746	-	Gm28940	ENSMUSG00000100786.1	10253	9	79	17	154		6	79	8	154	3	79	9	154		7.59505	5.19487	-0.547973	-2.40019		3.79759	5.84422	0.621926	2.04663		0	0	0	0
chr1	82448423	82586849	-	Col4a4	ENSMUSG00000067158.9	138426	8	105	14	173		4	105	7	173	4	105	7	173		3.80962	4.0463	0.0869573	0.236683		3.80962	4.0463	0.0869573	0.236683		0	0	0	0
chr1	82724890	82752394	+	Mff	ENSMUSG00000026150.14	27504	1741	5038	1694	4732		1494	5038	1454	4732	247	5038	240	4732		29.6546	30.727	0.0512482	1.07234		4.90274	5.07185	0.0489244	0.169112		1	0.0363583	2.92593	0.106382
chr1	82756649	82768461	-	Tm4sf20	ENSMUSG00000026149.2	11812	26	537	28	483		19	537	14	483	7	537	14	483		3.53819	2.89857	-0.287671	-0.639622		1.30356	2.89857	1.15289	1.59501		0	0	0	0
chr1	82839483	82901182	+	Agfg1	ENSMUSG00000026159.13	61699	2896	15518	2641	14595		2558	15518	2313	14595	338	15518	328	14595		16.4841	15.8479	-0.0567826	-0.63619		2.17812	2.24735	0.045141	0.0692293		1	0.0162077	3.70102	0.0599851
chr1	84036296	84364180	-	Pid1	ENSMUSG00000045658.16	327884	2	398	10	549		0	398	6	549	2	398	4	549		2.51256e-05	1.09291	15.4087	1.09289		0.502538	0.728616	0.535926	0.226078		0	0	0	0
chr1	84721189	84840516	-	Trip12	ENSMUSG00000026219.14	119327	18108	38350	18039	38229		893	38350	864	38229	17215	38350	17175	38229		2.32855	2.26006	-0.0430697	-0.0684885		44.8892	44.9266	0.00120303	0.0374478		0	0	0	0
chr1	84839841	84900487	+	Fbxo36	ENSMUSG00000073633.9	60646	20	223	34	267		19	223	30	267	1	223	4	267		8.52022	11.236	0.399164	2.71577		0.448475	1.49816	1.7401	1.04969		1	0.0164891	2.52433	0.041624
chr1	85067394	85080236	-	Gm18342	ENSMUSG00000101279.1	12842	33	66	46	75		5	66	1	75	28	66	45	75		7.5759	1.33346	-2.50624	-6.24243		42.4243	60.0001	0.500072	17.5757		0	0	0	0
chr1	85083069	85109853	-	A530032D15Rik	ENSMUSG00000089844.7	26784	19	86	5	65		3	86	2	65	16	86	3	65		3.48848	3.07707	-0.181042	-0.411412		18.6047	4.61553	-2.0111	-13.9892		0	0	0	0
chr1	85105946	85114035	+	A530040E14Rik	ENSMUSG00000072109.11	8089	52	110	39	85		31	110	24	85	21	110	15	85		28.1819	28.2354	0.00273594	0.0534951		19.091	17.6472	-0.113456	-1.44383		0	0	0	0
chr1	85159764	85194260	+	Gm6264	ENSMUSG00000089716.7	34496	7	59	10	65		6	59	8	65	1	59	2	65		10.1696	12.3078	0.275307	2.13818		1.69508	3.07707	0.860203	1.38199		0	0	0	0
chr1	85576899	85598817	-	Sp110	ENSMUSG00000070034.13	21918	2635	5408	2376	5412		248	5408	244	5412	2387	5408	2132	5412		4.5858	4.5085	-0.0245257	-0.0772992		44.1383	39.3939	-0.164058	-4.74437		0	0	0	0
chr1	85600378	85645037	+	Sp140	ENSMUSG00000070031.11	44659	1017	3489	960	3406		910	3489	870	3406	107	3489	90	3406		26.082	25.5432	-0.030116	-0.538813		3.06678	2.6424	-0.214878	-0.424385		3	0.0671757	8.33729	0.186688
chr1	85649988	85709998	+	Sp100	ENSMUSG00000026222.16	60010	7556	25567	8470	26723		6799	25567	7626	26723	757	25567	844	26723		26.5929	28.5372	0.101805	1.94434		2.96085	3.15833	0.0931506	0.19748		2	0.0333278	5.14268	0.0856971
chr1	85717083	85778643	-	A630001G21Rik	ENSMUSG00000052760.16	61560	1105	10514	1292	12451		332	10514	402	12451	773	10514	890	12451		3.1577	3.22866	0.0320622	0.0709617		7.3521	7.14802	-0.0406131	-0.204082		0	0	0	0
chr1	85793441	85851576	+	Cab39	ENSMUSG00000036707.16	58135	4087	23584	4062	25662		3705	23584	3700	25662	382	23584	362	25662		15.7098	14.4182	-0.123773	-1.2916		1.61974	1.41065	-0.199408	-0.209096		0	0	0	0
chr1	85894281	85908675	+	Itm2c	ENSMUSG00000026223.15	14394	813	2242	1202	3067		773	2242	1172	3067	40	2242	30	3067		34.4781	38.2132	0.14839	3.73509		1.78413	0.978158	-0.867078	-0.805968		1	0.0694734	2.63621	0.183146
chr1	86064387	86139151	+	Psmd1	ENSMUSG00000026229.17	74764	3292	5752	3848	6373		3196	5752	3767	6373	96	5752	81	6373		55.5633	59.1087	0.0892396	3.54546		1.66899	1.27099	-0.393021	-0.397998		1	0.0133754	2.53844	0.0339527
chr1	86099026	86111970	-	Htr2b	ENSMUSG00000026228.6	12944	30	1115	43	1012		16	1115	27	1012	14	1115	16	1012		1.43499	2.66799	0.894718	1.23301		1.25561	1.58104	0.332478	0.325423		0	0	0	0
chr1	86133637	86162788	+	Gm21972	ENSMUSG00000094638.1	29151	30	94	31	105		30	94	30	105	0	94	1	105		31.915	28.5715	-0.159657	-3.34347		0.000106383	0.952475	13.1282	0.952369		1	0.0343041	2.53844	0.087079
chr1	86154780	86278284	+	Armc9	ENSMUSG00000062590.13	123504	407	3124	503	3710		337	3124	450	3710	70	3124	53	3710		10.7875	12.1294	0.169152	1.34193		2.24072	1.42857	-0.649387	-0.812146		5	0.0404845	13.6588	0.110594
chr1	86275509	86301375	-	Gm16341	ENSMUSG00000087538.1	25866	6	121	14	266		1	121	4	266	5	121	10	266		0.826528	1.5038	0.863473	0.677268		4.13231	3.75943	-0.136433	-0.372876		2	0.0773216	5.34488	0.206637
chr1	86344719	86359400	-	Ncl	ENSMUSG00000026234.12	14681	8305	12265	10147	14862		1125	12265	1405	14862	7180	12265	8742	14862		9.17244	9.45364	0.0435641	0.281198		58.5406	58.8212	0.00689849	0.280592		0	0	0	0
chr1	86359574	86373791	+	C130036L24Rik	ENSMUSG00000073627.7	14217	41	1289	55	1443		27	1289	27	1443	14	1289	28	1443		2.09465	1.87111	-0.162819	-0.223546		1.08612	1.94041	0.837176	0.854288		0	0	0	0
chr1	86386303	86426228	-	Nmur1	ENSMUSG00000026237.5	39925	3	265	8	171		3	265	5	171	0	265	3	171		1.13211	2.92403	1.36894	1.79192		3.77358e-05	1.75444	15.5047	1.75441		1	0.025047	2.62066	0.0656396
chr1	86526726	86530712	+	Ptma	ENSMUSG00000026238.14	3986	61233	64460	76356	80354		60457	64460	75491	80354	776	64460	865	80354		93.7899	93.948	0.00242961	0.158083		1.20385	1.07649	-0.161322	-0.127361		0	0	0	0
chr1	86542994	86582629	-	Pde6d	ENSMUSG00000026239.14	39635	80	1776	92	2076		53	1776	66	2076	27	1776	26	2076		2.98424	3.1792	0.0912983	0.194956		1.52028	1.25241	-0.279622	-0.267863		1	0.0252302	2.72539	0.0687622
chr1	86582904	86609375	+	Cops7b	ENSMUSG00000026240.12	26471	449	2077	481	2212		416	2077	412	2212	33	2077	69	2212		20.0289	18.6257	-0.104789	-1.40321		1.58883	3.11935	0.973278	1.53052		0	0	0	0
chr1	86703808	87050095	+	Dis3l2	ENSMUSG00000053333.15	346287	837	6365	1023	6626		768	6365	951	6626	69	6365	72	6626		12.066	14.3526	0.250361	2.28656		1.08405	1.08663	0.00342277	0.00257496		4	0.0115511	11.0928	0.0320335
chr1	87213914	87240488	+	Eif4e2	ENSMUSG00000026254.17	26574	2134	8071	2370	7622		1923	8071	2180	7622	211	8071	190	7622		23.826	28.6014	0.263547	4.77537		2.6143	2.49279	-0.0686657	-0.121514		1	0.0376308	3.27016	0.123059
chr1	87326998	87450796	+	Gigyf2	ENSMUSG00000048000.15	123798	3330	15466	3844	16089		2938	15466	3445	16089	392	15466	399	16089		18.9965	21.4121	0.172695	2.41564		2.53459	2.47996	-0.0314395	-0.0546368		1	0.00807767	3.61438	0.0291958
chr1	87386363	87394729	-	Kcnj13	ENSMUSG00000079436.3	8366	62	1445	76	1685		39	1445	46	1685	23	1445	30	1685		2.69897	2.72998	0.0164801	0.0310074		1.5917	1.78042	0.161648	0.188719		0	0	0	0
chr1	87620312	87720507	+	Inpp5d	ENSMUSG00000026288.14	100195	5180	25066	7463	34792		4694	25066	6760	34792	486	25066	703	34792		18.7266	19.4298	0.0531816	0.703192		1.93888	2.02058	0.0595445	0.081698		5	0.0499027	14.1973	0.141696
chr1	87755870	87792428	+	Atg16l1	ENSMUSG00000026289.15	36558	2130	9674	2005	8810		1570	9674	1533	8810	560	9674	472	8810		16.2291	17.4007	0.100564	1.17161		5.78871	5.35755	-0.111669	-0.431164		1	0.0273538	2.86856	0.078466
chr1	87803680	87845158	+	Sag	ENSMUSG00000056055.13	41478	199	1273	139	880		152	1273	106	880	47	1273	33	880		11.9403	12.0455	0.0126503	0.105159		3.69207	3.75001	0.0224635	0.0579374		2	0.0482183	5.33727	0.128677
chr1	87853287	87945180	+	Dgkd	ENSMUSG00000070738.10	91893	18735	35202	12633	23319		17638	35202	11913	23319	1097	35202	720	23319		50.1051	51.0871	0.0280013	0.981989		3.1163	3.08761	-0.0133432	-0.0286891		2	0.0217644	5.0807	0.0552893
chr1	87853347	87854299	-	Gm19582	ENSMUSG00000101942.1	952	44	93	28	47		9	93	2	47	35	93	26	47		9.67752	4.25552	-1.1853	-5.42199		37.6345	55.3192	0.555727	17.6848		0	0	0	0
chr1	87945119	88008551	-	Usp40	ENSMUSG00000005501.14	63432	1650	7617	1480	6153		382	7617	291	6153	1268	7617	1189	6153		5.0151	4.7294	-0.0846205	-0.285697		16.647	19.3239	0.215127	2.67693		2	0.0315298	5.17051	0.0815126
chr1	88226986	88262289	+	Mroh2a	ENSMUSG00000079429.9	35303	496	1494	580	1755		264	1494	293	1755	232	1494	287	1755		17.6707	16.6952	-0.0819282	-0.975527		15.5288	16.3533	0.0746349	0.824494		0	0	0	0
chr1	88262471	88277633	-	Hjurp	ENSMUSG00000044783.16	15162	3384	14084	3996	15413		544	14084	575	15413	2840	14084	3421	15413		3.86254	3.73062	-0.0501353	-0.131922		20.1647	22.1955	0.138437	2.03082		0	0	0	0
chr1	88673125	88702221	-	Arl4c	ENSMUSG00000049866.12	29096	15	1267	7	397		0	1267	1	397	15	1267	6	397		7.89266e-06	0.251914	14.9621	0.251906		1.18391	1.51136	0.352292	0.327453		0	0	0	0
chr1	89070415	89155068	+	Sh3bp4	ENSMUSG00000036206.12	84653	30	574	18	337		20	574	12	337	10	574	6	337		3.48434	3.56086	0.0313412	0.0765221		1.74218	1.78044	0.031346	0.0382672		1	0.0118129	2.53844	0.0299864
chr1	89454806	89897617	+	Agap1	ENSMUSG00000055013.15	442811	68	1507	123	1470		60	1507	115	1470	8	1507	8	1470		3.98143	7.82314	0.974462	3.84171		0.530863	0.544224	0.0358633	0.0133618		14	0.0316162	37.7425	0.0852338
chr1	89568765	89576602	+	Gm28499	ENSMUSG00000101662.1	7837	1	50	0	23		0	50	0	23	1	50	0	23		0.0002	0.000434781	1.12029	0.000234781		2.0002	0.000434781	-12.1676	-1.99976		0	0	0	0
chr1	89650529	89683908	-	4933400F21Rik	ENSMUSG00000102009.6	33379	6	82	2	64		2	82	1	64	4	82	1	64		2.43914	1.56265	-0.642376	-0.87649		4.87816	1.56265	-1.64234	-3.31551		2	0.0599179	5.53813	0.165917
chr1	90602981	90613341	+	Cops8	ENSMUSG00000034432.11	10360	794	2128	861	2159		689	2128	757	2159	105	2128	104	2159		32.3778	35.0625	0.114924	2.68471		4.93421	4.81705	-0.0346709	-0.117166		0	0	0	0
chr1	90765923	90843971	-	Col6a3	ENSMUSG00000048126.16	78048	46	107	28	55		3	107	4	55	43	107	24	55		2.80383	7.2729	1.37513	4.46907		40.187	43.6365	0.118806	3.44949		3	0.0384379	8.12818	0.104143
chr1	90998737	91128944	+	Lrrfip1	ENSMUSG00000026305.15	130207	3685	25765	3779	23252		2916	25765	3136	23252	769	25765	643	23252		11.3177	13.487	0.252993	2.16933		2.98467	2.76535	-0.110107	-0.219316		8	0.0614406	21.4261	0.164554
chr1	91145089	91170795	+	Rbm44	ENSMUSG00000070732.2	25706	193	491	219	538		169	491	190	538	24	491	29	538		34.4196	35.316	0.037093	0.896432		4.888	5.39035	0.141134	0.502349		0	0	0	0
chr1	91179822	91225196	+	Ramp1	ENSMUSG00000034353.14	45374	2402	32837	1619	34194		2146	32837	1348	34194	256	32837	271	34194		6.53531	3.94221	-0.72925	-2.5931		0.779609	0.792537	0.0237281	0.0129283		2	0.0440781	5.53634	0.122016
chr1	91250304	91290337	+	Ube2f	ENSMUSG00000034343.14	40033	482	4482	642	5889		389	4482	494	5889	93	4482	148	5889		8.67916	8.38852	-0.0491392	-0.290641		2.07497	2.51316	0.276414	0.438193		2	0.0499588	5.64084	0.140905
chr1	91298338	91321075	+	Scly	ENSMUSG00000026307.12	22737	421	1856	777	3333		314	1856	553	3333	107	1856	224	3333		16.9181	16.5917	-0.0281098	-0.326446		5.76509	6.72067	0.221263	0.955584		0	0	0	0
chr1	91322075	91348306	+	Espnl	ENSMUSG00000049515.12	26231	18	194	22	174		12	194	16	174	6	194	6	174		6.18562	9.19545	0.572004	3.00984		3.09283	3.44833	0.156969	0.355498		0	0	0	0
chr1	91351016	91362416	+	Klhl30	ENSMUSG00000026308.8	11400	17	61	4	34		9	61	3	34	8	61	1	34		14.7542	8.8238	-0.741658	-5.93044		13.1149	2.94146	-2.1566	-10.1734		0	0	0	0
chr1	91366430	91374217	+	Erfe	ENSMUSG00000047443.14	7787	101	501	144	563		52	501	91	563	49	501	53	563		10.3793	16.1634	0.639029	5.78417		9.78046	9.41387	-0.0551139	-0.366587		0	0	0	0
chr1	91373861	91398815	-	Ilkap	ENSMUSG00000026309.14	24954	3246	12557	3453	12815		535	12557	585	12815	2711	12557	2868	12815		4.26057	4.56496	0.0995561	0.304391		21.5896	22.38	0.0518783	0.790472		0	0	0	0
chr1	91411483	91414038	-	Hes6	ENSMUSG00000067071.8	2555	75	1662	73	1554		75	1662	68	1554	0	1662	5	1554		4.51264	4.37581	-0.0444218	-0.136831		6.01685e-06	0.321757	15.7066	0.321751		0	0	0	0
chr1	91415982	91459324	-	Per2	ENSMUSG00000055866.9	43342	94	306	71	263		11	306	9	263	83	306	62	263		3.5948	3.42209	-0.0710349	-0.172713		27.1242	23.5742	-0.202374	-3.55003		0	0	0	0
chr1	91494647	91529307	+	Traf3ip1	ENSMUSG00000034292.13	34660	410	1804	398	1605		360	1804	349	1605	50	1804	49	1605		19.9557	21.7446	0.123856	1.78889		2.77162	3.05297	0.13948	0.281342		1	0.0288517	2.66861	0.0769939
chr1	91540544	91559589	+	Asb1	ENSMUSG00000026311.16	19045	91	666	149	979		77	666	111	979	14	666	38	979		11.5616	11.3381	-0.0281579	-0.223466		2.10212	3.88152	0.884779	1.7794		0	0	0	0
chr1	91928779	92195699	-	Hdac4	ENSMUSG00000026313.16	266920	1376	28516	1795	37378		176	28516	237	37378	1200	28516	1558	37378		0.617198	0.634063	0.0388937	0.0168654		4.20816	4.16823	-0.0137569	-0.0399366		6	0.0224786	16.0228	0.0600286
chr1	92439010	92473860	-	Ndufa10	ENSMUSG00000026260.12	34850	1592	5102	1605	4905		92	5102	65	4905	1500	5102	1540	4905		1.80322	1.32518	-0.444384	-0.478036		29.4002	31.3965	0.0947776	1.9963		1	0.0286944	2.5817	0.0740803
chr1	92637145	92641985	-	Cops9	ENSMUSG00000073616.10	4840	121	804	127	718		50	804	73	718	71	804	54	718		6.21892	10.1671	0.709179	3.94823		8.83086	7.5209	-0.231647	-1.30995		0	0	0	0
chr1	92831645	92860779	+	Gpc1	ENSMUSG00000034220.7	29134	144	368	111	276		127	368	103	276	17	368	8	276		34.5109	37.3189	0.112853	2.80798		4.61959	2.89859	-0.672416	-1.72101		0	0	0	0
chr1	92842177	92848771	-	Gm29480	ENSMUSG00000101995.1	6594	19	138	10	87		12	138	9	87	7	138	1	87		8.69572	10.3449	0.250547	1.64921		5.07253	1.14954	-2.14165	-3.92299		0	0	0	0
chr1	92859803	92902906	-	Ankmy1	ENSMUSG00000034212.14	43103	26	136	29	143		5	136	11	143	21	136	18	143		3.67654	7.69237	1.06508	4.01583		15.4412	12.5875	-0.2948	-2.85376		0	0	0	0
chr1	92910783	92924384	+	Rnpepl1	ENSMUSG00000026269.14	13601	1230	3457	1207	3378		1049	3457	1022	3378	181	3457	185	3378		30.3442	30.2546	-0.0042682	-0.0896405		5.23576	5.47662	0.0648868	0.24086		0	0	0	0
chr1	92934376	92947941	+	Capn10	ENSMUSG00000026270.11	13565	475	1115	555	1214		411	1115	507	1214	64	1115	48	1214		36.861	41.7628	0.180123	4.90178		5.73992	3.95388	-0.537761	-1.78604		0	0	0	0
chr1	92950865	92986391	+	Gpr35	ENSMUSG00000026271.15	35526	3	149	5	185		1	149	3	185	2	149	2	185		0.671208	1.62167	1.27265	0.950467		1.34235	1.08113	-0.312213	-0.261214		0	0	0	0
chr1	93015464	93101951	-	Kif1a	ENSMUSG00000014602.15	86487	28	84	46	127		2	84	4	127	26	84	42	127		2.38107	3.14968	0.403597	0.768614		30.9525	33.0709	0.0955089	2.11846		2	0.0231249	5.29997	0.0612805
chr1	93235841	93301065	+	Sned1	ENSMUSG00000047793.13	65224	38	332	33	323		26	332	28	323	12	332	5	323		7.83135	8.66876	0.146564	0.837406		3.61449	1.54802	-1.22337	-2.06647		3	0.0459953	7.70455	0.118124
chr1	93299211	93305915	-	Mterf4	ENSMUSG00000026273.13	6704	251	596	263	555		63	596	68	555	188	596	195	555		10.5705	12.2523	0.213007	1.68178		31.5436	35.1351	0.155566	3.59151		1	0.149165	2.69644	0.402214
chr1	93308770	93343482	-	Pask	ENSMUSG00000026274.11	34712	541	1315	856	1940		25	1315	49	1940	516	1315	807	1940		1.90115	2.52578	0.409857	0.62463		39.2395	41.5979	0.0842037	2.35839		4	0.115234	10.8512	0.312605
chr1	93342854	93373489	+	Ppp1r7	ENSMUSG00000026275.13	30635	745	2482	921	2791		588	2482	677	2791	157	2482	244	2791		23.6906	24.2565	0.0340606	0.565966		6.32555	8.74239	0.466837	2.41684		1	0.0326424	2.52433	0.0824002
chr1	93405940	93478815	-	Hdlbp	ENSMUSG00000034088.15	72875	6816	15252	6508	14317		433	15252	359	14317	6383	15252	6149	14317		2.83897	2.50751	-0.179114	-0.331463		41.8502	42.9489	0.0373864	1.09869		3	0.0411664	9.47543	0.130023
chr1	93478964	93510260	+	Sept2	ENSMUSG00000026276.20	31296	1186	3500	1341	4142		1102	3500	1224	4142	84	3500	117	4142		31.4857	29.5509	-0.0914933	-1.93477		2.4	2.82472	0.235074	0.424722		1	0.031953	2.75382	0.0879927
chr1	93512079	93621976	+	Farp2	ENSMUSG00000034066.13	109897	139	1018	154	999		71	1018	100	999	68	1018	54	999		6.97447	10.01	0.521289	3.03555		6.67977	5.40541	-0.305394	-1.27436		3	0.0272983	8.99488	0.0818483
chr1	93619751	93658659	-	Stk25	ENSMUSG00000026277.14	38908	2222	3516	2374	3588		238	3516	226	3588	1984	3516	2148	3588		6.76906	6.29878	-0.103884	-0.470282		56.4278	59.8662	0.0853371	3.43846		0	0	0	0
chr1	93701935	93754864	-	Thap4	ENSMUSG00000026279.14	52929	28	856	111	960		14	856	25	960	14	856	86	960		1.63553	2.60418	0.671073	0.968651		1.63553	8.95834	2.45348	7.32282		2	0.0377865	5.20145	0.0982722
chr1	93751500	93790610	+	Atg4b	ENSMUSG00000026280.17	39110	1432	4066	1350	3686		1296	4066	1206	3686	136	4066	144	3686		31.8741	32.7184	0.0377183	0.844316		3.34481	3.90668	0.224016	0.561864		2	0.0511378	5.34577	0.136686
chr1	93792576	93801934	-	Dtymk	ENSMUSG00000026281.15	9358	792	3622	1197	3897		87	3622	91	3897	705	3622	1106	3897		2.40199	2.33513	-0.0407263	-0.0668585		19.4644	28.3808	0.544079	8.91642		0	0	0	0
chr1	93803965	93822101	+	Ing5	ENSMUSG00000026283.13	18136	521	1206	617	1569		456	1206	527	1569	65	1206	90	1569		37.811	33.5883	-0.170846	-4.22267		5.38973	5.73614	0.0898692	0.346418		1	0.055139	2.70223	0.148998
chr1	93824909	93852348	+	D2hgdh	ENSMUSG00000073609.9	27439	235	1455	281	1323		197	1455	218	1323	38	1455	63	1323		13.5395	16.4777	0.283339	2.93818		2.61169	4.76191	0.866557	2.15022		0	0	0	0
chr1	94038305	94052553	-	Pdcd1	ENSMUSG00000026285.7	14248	168	932	494	2618		7	932	38	2618	161	932	456	2618		0.751084	1.45149	0.950493	0.70041		17.2747	17.4179	0.0119094	0.143192		0	0	0	0
chr1	95313623	95335284	+	Fam174a	ENSMUSG00000051185.9	21661	13	792	15	693		4	792	2	693	9	792	13	693		0.505063	0.288615	-0.807319	-0.216448		1.13638	1.87592	0.723155	0.73954		0	0	0	0
chr1	95587682	95667571	-	St8sia4	ENSMUSG00000040710.10	79889	110	7358	136	9262		33	7358	40	9262	77	7358	96	9262		0.448493	0.431873	-0.0544769	-0.0166196		1.04648	1.03649	-0.0138345	-0.0099871		0	0	0	0
chr1	96816270	96872171	-	Slco4c1	ENSMUSG00000040693.7	55901	6	58	16	129		2	58	2	129	4	58	14	129		3.44844	1.55046	-1.15324	-1.89798		6.89671	10.8528	0.654084	3.95607		0	0	0	0
chr1	97346475	97573015	+	Gm7135	ENSMUSG00000101348.6	226540	9	552	15	780		6	552	12	780	3	552	3	780		1.08697	1.53847	0.501182	0.4515		0.543496	0.384628	-0.498806	-0.158868		0	0	0	0
chr1	97606318	97662074	-	D1Ertd622e	ENSMUSG00000044768.16	55756	143	3518	200	5088		34	3518	61	5088	109	3518	139	5088		0.966461	1.1989	0.310929	0.23244		3.09835	2.73192	-0.181587	-0.366434		0	0	0	0
chr1	97706048	97770411	-	Ppip5k2	ENSMUSG00000040648.14	64363	3635	11201	4071	11288		355	11201	401	11288	3280	11201	3670	11288		3.16936	3.55245	0.164621	0.383085		29.2831	32.5124	0.150922	3.2293		0	0	0	0
chr1	97770172	97793709	+	Gin1	ENSMUSG00000026333.14	23537	330	1491	346	1773		298	1491	305	1773	32	1491	41	1773		19.9866	17.2025	-0.216415	-2.78411		2.14622	2.31247	0.107639	0.166253		0	0	0	0
chr1	97795114	98095646	-	Pam	ENSMUSG00000026335.16	300532	237	4315	361	6689		32	4315	57	6689	205	4315	304	6689		0.741601	0.852147	0.200458	0.110545		4.75087	4.54478	-0.0639828	-0.206095		1	0.00332743	2.52433	0.00839954
chr1	98031116	98057680	-	B230216N24Rik	ENSMUSG00000089706.7	26564	31	518	47	829		14	518	24	829	17	518	23	829		2.70272	2.89507	0.0991834	0.192345		3.28187	2.77444	-0.242323	-0.507433		0	0	0	0
chr1	98131456	98144655	+	1810006J02Rik	ENSMUSG00000100182.6	13199	18	122	48	361		12	122	29	361	6	122	19	361		9.83614	8.03327	-0.292105	-1.80287		4.91811	5.26318	0.0978317	0.345073		0	0	0	0
chr1	98589517	98607384	+	Gm7967	ENSMUSG00000100009.6	17867	34	466	62	934		15	466	30	934	19	466	32	934		3.2189	3.212	-0.00309725	-0.00690309		4.07727	3.42613	-0.251023	-0.651139		0	0	0	0
chr1	105382260	105569139	-	Gm28403	ENSMUSG00000101214.1	186879	3	64	0	67		1	64	0	67	2	64	0	67		1.56265	0.000149254	-13.3539	-1.5625		3.12515	0.000149254	-14.3539	-3.125		0	0	0	0
chr1	105518422	105663677	-	Pign	ENSMUSG00000056536.14	145255	1510	8083	2091	10622		130	8083	186	10622	1380	8083	1905	10622		1.60831	1.75108	0.122698	0.142769		17.0729	17.9345	0.07103	0.861606		0	0	0	0
chr1	105663861	105755191	+	Relch	ENSMUSG00000026319.13	91330	3652	21865	3926	22718		2753	21865	2976	22718	899	21865	950	22718		12.5909	13.0997	0.0571574	0.508846		4.11159	4.18171	0.0243939	0.0701122		1	0.0109493	3.18932	0.0349208
chr1	105780718	105847981	+	Tnfrsf11a	ENSMUSG00000026321.7	67263	28	619	13	292		26	619	10	292	2	619	3	292		4.20034	3.42469	-0.294532	-0.775648		0.323118	1.02743	1.66891	0.704313		0	0	0	0
chr1	105979350	105990282	-	Gm7160	ENSMUSG00000099843.1	10932	22	964	38	1286		10	964	16	1286	12	964	22	1286		1.03735	1.24418	0.262281	0.206821		1.24482	1.71074	0.458678	0.465915		0	0	0	0
chr1	105990406	106034074	+	Zcchc2	ENSMUSG00000038866.15	43668	1143	8369	1466	9698		923	8369	1207	9698	220	8369	259	9698		11.0288	12.4459	0.174391	1.41707		2.62875	2.67065	0.0228165	0.0419046		1	0.0229001	2.52433	0.0578073
chr1	106171752	106394250	+	Phlpp1	ENSMUSG00000044340.7	222498	260	2424	308	3525		230	2424	271	3525	30	2424	37	3525		9.48845	7.68795	-0.303575	-1.80051		1.23763	1.04965	-0.237672	-0.18798		2	0.00898884	5.50471	0.0247405
chr1	106541943	106575045	+	D630008O14Rik	ENSMUSG00000054006.14	33102	262	3045	97	1190		145	3045	43	1190	117	3045	54	1190		4.76191	3.61345	-0.398161	-1.14845		3.84237	4.53782	0.240005	0.695455		0	0	0	0
chr1	106720459	106759727	-	Kdsr	ENSMUSG00000009905.5	39268	583	4388	701	5436		59	4388	103	5436	524	4388	598	5436		1.34458	1.89478	0.494875	0.550199		11.9417	11.0007	-0.118403	-0.940924		0	0	0	0
chr1	106764071	106796728	-	Vps4b	ENSMUSG00000009907.17	32657	2771	11802	3384	12910		301	11802	368	12910	2470	11802	3016	12910		2.55042	2.8505	0.160485	0.300088		20.9287	23.3617	0.158668	2.43308		0	0	0	0
chr1	106861173	106883348	+	Serpinb5	ENSMUSG00000067006.12	22175	6	83	4	55		5	83	4	55	1	83	0	55		6.02421	7.2729	0.271758	1.24869		1.20494	0.000181818	-12.6942	-1.20476		1	0.0450958	2.53844	0.114473
chr1	111858702	111864918	-	Dsel	ENSMUSG00000038702.6	6216	20	492	26	574		8	492	15	574	12	492	11	574		1.62604	2.61326	0.68449	0.987221		2.43904	1.91639	-0.347922	-0.522651		0	0	0	0
chr1	115684756	116587323	+	Cntnap5a	ENSMUSG00000070695.4	902567	1	79	0	46		0	79	0	46	1	79	0	46		0.000126582	0.000217391	0.780217	9.08087e-05		1.26595	0.000217391	-12.5076	-1.26573		0	0	0	0
chr1	118294778	118311739	-	Tsn	ENSMUSG00000026374.14	16961	730	2332	834	2590		64	2332	65	2590	666	2332	769	2590		2.74443	2.50966	-0.129017	-0.234773		28.5592	29.6911	0.0560771	1.13194		0	0	0	0
chr1	118321839	118333822	+	Nifk	ENSMUSG00000026377.12	11983	1109	2284	1399	2522		1058	2284	1335	2522	51	2284	64	2522		46.3222	52.9342	0.192494	6.61194		2.23293	2.53767	0.184568	0.304743		1	0.0834516	2.66861	0.2227
chr1	118389058	118612678	+	Clasp1	ENSMUSG00000064302.13	223620	4646	28100	4689	27455		4026	28100	4145	27455	620	28100	544	27455		14.3274	15.0974	0.0755261	0.77003		2.20641	1.98142	-0.15516	-0.224982		5	0.0223594	13.0999	0.0585812
chr1	118478604	118479591	-	Gm28466	ENSMUSG00000100770.1	987	13	56	18	70		5	56	10	70	8	56	8	70		8.92873	14.2858	0.678058	5.3571		14.2859	11.4287	-0.321928	-2.85717		0	0	0	0
chr1	118834132	119053619	-	Gli2	ENSMUSG00000048402.14	219487	3	88	2	50		3	88	2	50	0	88	0	50		3.4092	4.00019	0.230636	0.590991		0.000113636	0.0002	0.815574	8.63634e-05		2	0.00911216	5.57911	0.0254189
chr1	119470305	119504794	-	Ralb	ENSMUSG00000004451.14	34489	101	401	78	262		3	401	7	262	98	401	71	262		0.748154	2.67179	1.8364	1.92364		24.4389	27.0993	0.149073	2.66034		0	0	0	0
chr1	119520090	119526359	-	Gm27184	ENSMUSG00000098447.2	6269	53	625	31	472		37	625	18	472	16	625	13	472		5.92002	3.81358	-0.634455	-2.10644		2.56002	2.75426	0.105511	0.194242		0	0	0	0
chr1	119545037	119649000	-	Epb41l5	ENSMUSG00000026383.14	103963	79	490	178	974		7	490	23	974	72	490	155	974		1.42859	2.36141	0.725053	0.932815		14.6939	15.9138	0.115058	1.21987		0	0	0	0
chr1	119652467	119837613	-	Ptpn4	ENSMUSG00000026384.13	185146	1374	11366	2042	14269		111	11366	151	14269	1263	11366	1891	14269		0.976598	1.05824	0.115829	0.0816411		11.1121	13.2525	0.254135	2.14042		0	0	0	0
chr1	119903130	119906897	+	Gm28209	ENSMUSG00000101224.1	3767	10	68	5	32		6	68	4	32	4	68	1	32		8.82366	12.5003	0.50251	3.67661		5.88249	3.1253	-0.912431	-2.75719		0	0	0	0
chr1	119907890	119913208	-	Tmem177	ENSMUSG00000036975.5	5318	59	214	50	142		7	214	7	142	52	214	43	142		3.27107	4.92964	0.59172	1.65857		24.2991	30.2817	0.317545	5.98264		0	0	0	0
chr1	120113280	120121078	-	Dbi	ENSMUSG00000026385.16	7798	1018	1473	1049	1491		32	1473	18	1491	986	1473	1031	1491		2.17244	1.20725	-0.847594	-0.965194		66.9382	69.1482	0.0468619	2.21		1	0.128238	2.7337	0.350564
chr1	120121187	120188189	+	3110009E18Rik	ENSMUSG00000026388.15	67002	260	3822	231	3733		213	3822	192	3733	47	3822	39	3733		5.573	5.14332	-0.115755	-0.429682		1.22973	1.04474	-0.235194	-0.184986		0	0	0	0
chr1	120190757	120272705	-	Steap3	ENSMUSG00000026389.16	81948	25	330	13	314		7	330	2	314	18	330	11	314		2.12124	0.636974	-1.7356	-1.48427		5.45457	3.50322	-0.638787	-1.95136		1	0.0122029	2.81119	0.0343046
chr1	121304353	121332589	-	Insig2	ENSMUSG00000003721.14	28236	490	3493	413	2878		94	3493	63	2878	396	3493	350	2878		2.6911	2.18902	-0.297908	-0.502076		11.337	12.1612	0.101255	0.824264		0	0	0	0
chr1	121431049	121506460	+	Ccdc93	ENSMUSG00000026339.18	75411	2756	11346	2180	8621		2562	11346	2010	8621	194	11346	170	8621		22.5806	23.3152	0.0461817	0.734516		1.70985	1.97193	0.205735	0.262076		3	0.039782	8.20335	0.108782
chr1	121553835	121567989	-	Ddx18	ENSMUSG00000001674.11	14154	1951	3519	2047	3430		118	3519	115	3430	1833	3519	1932	3430		3.35323	3.35277	-0.00019603	-0.000455598		52.0887	56.3265	0.112845	4.23787		1	0.0706514	2.50914	0.177274
chr1	123321471	124045559	-	Dpp10	ENSMUSG00000036815.16	724088	10	403	6	108		2	403	1	108	8	403	5	108		0.496303	0.926018	0.89982	0.429715		1.98514	4.62972	1.22169	2.64458		0	0	0	0
chr1	125392905	125435727	-	Actr3	ENSMUSG00000026341.16	42822	13053	38754	13114	40909		877	38754	869	40909	12176	38754	12245	40909		2.26299	2.12423	-0.0912937	-0.138765		31.4187	29.9323	-0.0699205	-1.4864		0	0	0	0
chr1	125560595	125595820	+	Slc35f5	ENSMUSG00000026342.10	35225	34	118	28	121		29	118	25	121	5	118	3	121		24.5763	20.6612	-0.250344	-3.91511		4.23737	2.47942	-0.773167	-1.75795		0	0	0	0
chr1	125913620	126830799	-	Nckap5	ENSMUSG00000049690.15	917179	14	1113	15	1042		5	1113	3	1042	9	1113	12	1042		0.449245	0.287917	-0.641848	-0.161328		0.808634	1.15164	0.510132	0.343007		4	0.0043612	10.3983	0.0113372
chr1	127205015	127488336	+	Mgat5	ENSMUSG00000036155.13	283321	1984	21498	2681	36741		1813	21498	2336	36741	171	21498	345	36741		8.43334	6.35802	-0.407527	-2.07532		0.795423	0.939006	0.239411	0.143582		6	0.0211774	16.6602	0.0588033
chr1	127486546	127679548	-	Tmem163	ENSMUSG00000026347.13	193002	57	2530	68	3694		48	2530	50	3694	9	2530	18	3694		1.89724	1.35355	-0.487153	-0.543688		0.355735	0.487279	0.453946	0.131544		4	0.0207252	11.282	0.0584554
chr1	127729413	127767978	+	Acmsd	ENSMUSG00000026348.7	38565	7	112	13	99		3	112	8	99	4	112	5	99		2.67866	8.0809	1.59301	5.40224		3.57151	5.0506	0.499919	1.47909		0	0	0	0
chr1	127774164	127808061	+	Ccnt2	ENSMUSG00000026349.14	33897	1610	11977	1524	12067		1215	11977	1171	12067	395	11977	353	12067		10.1444	9.70415	-0.0640157	-0.440292		3.29799	2.92533	-0.172985	-0.372654		1	0.0295011	2.53844	0.0748869
chr1	127815253	127855031	-	Map3k19	ENSMUSG00000051590.9	39778	34	186	18	129		8	186	3	129	26	186	15	129		4.30113	2.32566	-0.887076	-1.97547		13.9785	11.628	-0.265614	-2.35057		1	0.0251395	2.6655	0.0670094
chr1	127868773	127943868	+	Rab3gap1	ENSMUSG00000036104.12	75095	4262	18284	4433	16835		3879	18284	4043	16835	383	18284	390	16835		21.2153	24.0154	0.178859	2.80017		2.09473	2.3166	0.145248	0.221875		2	0.0266329	5.3244	0.0709022
chr1	127954184	128103047	-	Zranb3	ENSMUSG00000036086.16	148863	337	2471	491	3157		28	2471	48	3157	309	2471	443	3157		1.13315	1.52043	0.424146	0.387285		12.5051	14.0323	0.16624	1.52725		0	0	0	0
chr1	128103301	128237736	+	R3hdm1	ENSMUSG00000056211.13	134435	1905	11586	1988	11282		1552	11586	1685	11282	353	11586	303	11282		13.3955	14.9353	0.15698	1.53982		3.04678	2.68569	-0.181991	-0.361087		0	0	0	0
chr1	128243964	128279378	+	Ubxn4	ENSMUSG00000026353.9	35414	3357	10176	3232	9259		3197	10176	3091	9259	160	10176	141	9259		31.4171	33.3837	0.0875972	1.96668		1.57233	1.52284	-0.0461343	-0.0494843		0	0	0	0
chr1	128284756	128328318	-	Lct	ENSMUSG00000026354.8	43562	11	143	8	161		1	143	2	161	10	143	6	161		0.69937	1.2423	0.828882	0.542927		6.99307	3.72677	-0.908001	-3.2663		0	0	0	0
chr1	128331590	128359664	-	Mcm6	ENSMUSG00000026355.11	28074	9685	15760	11873	21240		303	15760	380	21240	9382	15760	11493	21240		1.92259	1.78908	-0.103835	-0.133512		59.5305	54.1102	-0.137728	-5.42029		1	0.0356201	2.52433	0.089917
chr1	128363707	128417368	-	Dars	ENSMUSG00000026356.15	53661	5509	14957	7257	16501		197	14957	146	16501	5312	14957	7111	16501		1.31711	0.884795	-0.57396	-0.432314		35.5151	43.0944	0.279065	7.57921		3	0.0559065	7.85984	0.146472
chr1	128588199	128592293	-	Cxcr4	ENSMUSG00000045382.6	4094	1516	3553	1590	3564		35	3553	31	3564	1481	3553	1559	3564		0.985086	0.869812	-0.179546	-0.115274		41.6831	43.743	0.0695896	2.0599		0	0	0	0
chr1	129273302	130219278	+	Thsd7b	ENSMUSG00000042581.14	945976	5	150	18	997		2	150	12	997	3	150	6	997		1.3334	1.20362	-0.147728	-0.129778		2.00007	0.601815	-1.73265	-1.39825		0	0	0	0
chr1	130439027	130462744	-	Cd55	ENSMUSG00000026399.12	23717	40	269	75	413		9	269	7	413	31	269	68	413		3.34576	1.69494	-0.981101	-1.65082		11.5242	16.4649	0.514729	4.94071		0	0	0	0
chr1	130689182	130729253	-	Pfkfb2	ENSMUSG00000026409.14	40071	216	2255	220	2112		57	2255	43	2112	159	2255	177	2112		2.52772	2.03599	-0.312107	-0.491731		7.051	8.38069	0.24924	1.32968		1	0.0249557	2.54207	0.0634391
chr1	130717327	130724358	+	Yod1	ENSMUSG00000046404.5	7031	131	294	107	257		109	294	92	257	22	294	15	257		37.0749	35.7977	-0.0505744	-1.27716		7.48302	5.83661	-0.35849	-1.64641		0	0	0	0
chr1	130731976	130744622	+	AA986860	ENSMUSG00000042510.7	12646	2	64	3	95		2	64	2	95	0	64	1	95		3.12515	2.10537	-0.569855	-1.01979		0.00015625	1.05274	12.718	1.05258		0	0	0	0
chr1	130865669	130880791	+	Fcmr	ENSMUSG00000042474.6	15122	23	74	38	92		21	74	38	92	2	74	0	92		28.3785	41.3044	0.541499	12.9259		2.70283	0.000108696	-14.6019	-2.70273		0	0	0	0
chr1	131053700	131097826	-	Mapkapk2	ENSMUSG00000016528.10	44126	1405	2576	1440	2894		70	2576	88	2894	1335	2576	1352	2894		2.7174	3.04078	0.162216	0.323382		51.8245	46.7173	-0.149677	-5.10719		3	0.0679871	7.96379	0.180478
chr1	131153181	131187658	+	Eif2d	ENSMUSG00000026427.16	34477	1497	4911	1715	4804		1342	4911	1571	4804	155	4911	144	4804		27.3264	32.7019	0.259079	5.3755		3.15618	2.9975	-0.0744187	-0.158678		1	0.0290048	2.86856	0.0832021
chr1	131176410	131245258	-	Rassf5	ENSMUSG00000026430.16	68848	1027	1841	890	1530		119	1841	142	1530	908	1841	748	1530		6.46388	9.28105	0.521887	2.81717		49.321	48.8889	-0.012696	-0.432132		0	0	0	0
chr1	131254343	131279606	-	Ikbke	ENSMUSG00000042349.13	25263	4011	8425	3302	7145		545	8425	482	7145	3466	8425	2820	7145		6.46884	6.74598	0.0605196	0.277134		41.1395	39.4682	-0.0598338	-1.67131		1	0.0395836	2.75382	0.109006
chr1	131259507	131260553	+	Gm28914	ENSMUSG00000102027.1	1046	59	128	46	111		30	128	18	111	29	128	28	111		23.4376	16.2163	-0.531378	-7.22127		22.6563	25.2253	0.154958	2.56898		0	0	0	0
chr1	131285251	131527352	-	Srgap2	ENSMUSG00000026425.15	242101	1301	13312	1740	18044		200	13312	263	18044	1101	13312	1477	18044		1.5024	1.45755	-0.0437292	-0.0448558		8.27073	8.18555	-0.0149365	-0.0851869		6	0.024783	16.6175	0.0686386
chr1	131527903	131539872	+	Fam72a	ENSMUSG00000055184.4	11969	151	784	222	1099		133	784	194	1099	18	784	28	1099		16.9643	17.6524	0.0573643	0.688122		2.29593	2.54778	0.150161	0.251849		0	0	0	0
chr1	131638306	131675505	+	Ctse	ENSMUSG00000004552.16	37199	189	8533	397	15530		150	8533	274	15530	39	8533	123	15530		1.75788	1.76433	0.00528009	0.00644542		0.45705	0.792016	0.793177	0.334966		1	0.0268824	2.67102	0.0718035
chr1	131688695	131715439	+	Rab7b	ENSMUSG00000052688.12	26744	36	207	14	89		34	207	11	89	2	207	3	89		16.4252	12.3596	-0.41027	-4.06551		0.966231	3.3709	1.80269	2.40466		2	0.0747831	5.40231	0.202001
chr1	131827493	131848865	+	Slc41a1	ENSMUSG00000013275.9	21372	473	2144	739	3192		435	2144	665	3192	38	2144	74	3192		20.2892	20.8333	0.0381831	0.544153		1.77239	2.3183	0.387368	0.545906		0	0	0	0
chr1	131867224	131872887	+	Rab29	ENSMUSG00000026433.13	5663	333	816	423	923		299	816	395	923	34	816	28	923		36.6422	42.7952	0.223946	6.15307		4.16668	3.0336	-0.457868	-1.13308		0	0	0	0
chr1	131910534	131936321	+	Nucks1	ENSMUSG00000026434.12	25787	3431	5315	4934	7327		3385	5315	4842	7327	46	5315	92	7327		63.6877	66.0843	0.0532943	2.39667		0.865477	1.25563	0.536846	0.390154		0	0	0	0
chr1	131962967	131982969	+	Slc45a3	ENSMUSG00000026435.15	20002	27	118	13	101		20	118	11	101	7	118	2	101		16.9492	10.8912	-0.638059	-6.05805		5.93228	1.9803	-1.58287	-3.95199		0	0	0	0
chr1	132007607	132032612	+	Elk4	ENSMUSG00000026436.15	25005	1531	6392	1344	5367		1356	6392	1219	5367	175	6392	125	5367		21.214	22.7129	0.0984925	1.49886		2.7378	2.32905	-0.233275	-0.408749		1	0.039992	2.55735	0.102274
chr1	132022806	132068062	-	Mfsd4a	ENSMUSG00000059149.17	45256	55	721	36	547		27	721	23	547	28	721	13	547		3.74481	4.20477	0.167134	0.459958		3.88351	2.37662	-0.708451	-1.50689		1	0.0220965	2.52433	0.0557789
chr1	132316126	132333488	+	Nuak2	ENSMUSG00000009772.15	17362	36	177	44	214		26	177	35	214	10	177	9	214		14.6893	16.3552	0.154981	1.66587		5.64977	4.20565	-0.425863	-1.44412		0	0	0	0
chr1	132342023	132349626	+	F730311O21Rik	ENSMUSG00000100658.1	7603	16	115	21	124		8	115	13	124	8	115	8	124		6.9566	10.4839	0.591727	3.52734		6.9566	6.45169	-0.108706	-0.504914		0	0	0	0
chr1	132356315	132391281	-	Tmcc2	ENSMUSG00000042066.15	34966	5	191	13	193		3	191	6	193	2	191	7	193		1.57073	3.10886	0.984948	1.53813		1.04717	3.62699	1.79228	2.57982		2	0.0571984	5.18858	0.148389
chr1	132417555	132466958	+	Dstyk	ENSMUSG00000042046.15	49403	305	2342	350	2650		241	2342	263	2650	64	2342	87	2650		10.2904	9.92453	-0.0522217	-0.365822		2.73271	3.28302	0.264692	0.550311		1	0.0202417	2.53638	0.0513406
chr1	132466433	132477064	-	6030442K20Rik	ENSMUSG00000097760.2	10631	11	731	19	870		11	731	7	870	0	731	12	870		1.5048	0.804609	-0.903213	-0.700192		1.36799e-05	1.37932	16.6215	1.37931		0	0	0	0
chr1	132477365	132505659	+	Rbbp5	ENSMUSG00000026439.14	28294	2483	8958	2722	9625		2239	8958	2458	9625	244	8958	264	9625		24.9944	25.5377	0.0310205	0.543244		2.72382	2.74286	0.0100469	0.0190348		0	0	0	0
chr1	132506230	132508639	+	Tmem81	ENSMUSG00000048174.2	2409	51	193	56	225		37	193	39	225	14	193	17	225		19.171	17.3334	-0.145375	-1.83766		7.25393	7.5556	0.0587821	0.301663		0	0	0	0
chr1	132564690	132741797	-	Nfasc	ENSMUSG00000026442.14	177107	8	101	1	32		3	101	0	32	5	101	1	32		2.97039	0.000312499	-13.2145	-2.97008		4.95059	3.1253	-0.663604	-1.82529		3	0.0169389	8.04138	0.0454041
chr1	132959484	133030561	-	Mdm4	ENSMUSG00000054387.13	71077	5071	28530	4968	26518		880	28530	856	26518	4191	28530	4112	26518		3.08447	3.228	0.0656151	0.143524		14.6898	15.5064	0.0780535	0.816648		0	0	0	0
chr1	133045667	133108687	+	Pik3c2b	ENSMUSG00000026447.16	63020	576	1694	430	1213		504	1694	367	1213	72	1694	63	1213		29.7521	30.2556	0.0242107	0.5035		4.2503	5.19374	0.289209	0.943442		3	0.0476039	7.68773	0.121989
chr1	133050128	133068405	-	Gm28609	ENSMUSG00000101102.1	18277	10	453	14	364		8	453	4	364	2	453	10	364		1.76603	1.09893	-0.684409	-0.667098		0.441523	2.74728	2.63744	2.30576		3	0.164141	7.68773	0.420623
chr1	133131143	133139783	+	Ppp1r15b	ENSMUSG00000046062.5	8640	508	6653	550	7517		294	6653	315	7517	214	6653	235	7517		4.41906	4.1905	-0.0766163	-0.228558		3.2166	3.12625	-0.0411021	-0.090347		1	0.115741	2.69644	0.312088
chr1	133164210	133303435	+	Plekha6	ENSMUSG00000041757.16	139225	34	318	12	178		30	318	11	178	4	318	1	178		9.43399	6.17983	-0.610302	-3.25416		1.25789	0.561854	-1.16274	-0.696039		3	0.0215479	7.62688	0.054781
chr1	133382303	133424377	-	Sox13	ENSMUSG00000070643.11	42074	140	1002	109	703		28	1002	24	703	112	1002	85	703		2.79442	3.41395	0.288894	0.619533		11.1777	12.0911	0.113322	0.913397		2	0.0475353	5.15718	0.122574
chr1	133603871	133610291	-	Snrpe	ENSMUSG00000090553.8	6420	1279	2646	1365	2856		46	2646	55	2856	1233	2646	1310	2856		1.73848	1.92577	0.147614	0.187297		46.5986	45.8683	-0.0227889	-0.730292		0	0	0	0
chr1	133610411	133614422	+	Gm26706	ENSMUSG00000097014.1	4011	5	53	2	41		4	53	1	41	1	53	1	41		7.54734	2.43926	-1.62952	-5.10808		1.88698	2.43926	0.370368	0.552285		0	0	0	0
chr1	133619862	133661380	-	Zc3h11a	ENSMUSG00000102976.6	41518	1347	11300	1324	11944		566	11300	548	11944	781	11300	776	11944		5.00885	4.58808	-0.126589	-0.420772		6.91151	6.49699	-0.0892292	-0.414519		0	0	0	0
chr1	133619940	133661318	-	Gm38394	ENSMUSG00000094410.7	41378	393	442	446	503		8	442	19	503	385	442	427	503		1.80998	3.77736	1.06141	1.96738		87.1041	84.8907	-0.0371344	-2.21342		0	0	0	0
chr1	133679091	133690108	-	Lax1	ENSMUSG00000051998.14	11017	626	4177	934	6441		152	4177	239	6441	474	4177	695	6441		3.63898	3.71061	0.0281214	0.0716278		11.3479	10.7903	-0.0726917	-0.557608		0	0	0	0
chr1	133699457	133801041	-	Atp2b4	ENSMUSG00000026463.17	101584	170	760	237	1256		13	760	30	1256	157	760	207	1256		1.71054	2.38854	0.48168	0.678004		20.6579	16.4809	-0.325899	-4.17701		1	0.00984407	2.5817	0.0254144
chr1	134075170	134079120	-	Btg2	ENSMUSG00000020423.6	3950	1187	4126	1036	3154		85	4126	46	3154	1102	4126	990	3154		2.06011	1.45847	-0.498266	-0.60164		26.7087	31.3887	0.232937	4.68004		0	0	0	0
chr1	134296783	134332928	-	Ppfia4	ENSMUSG00000026458.13	36145	47	152	24	81		3	152	4	81	44	152	20	81		1.97375	4.93839	1.3231	2.96464		28.9474	24.6915	-0.229423	-4.25596		0	0	0	0
chr1	134346097	134361979	-	Tmem183a	ENSMUSG00000042305.12	15882	1016	3812	1015	3969		127	3812	124	3969	889	3812	891	3969		3.33159	3.12422	-0.0927158	-0.207372		23.3211	22.449	-0.0549854	-0.872112		0	0	0	0
chr1	134405559	134411740	+	Cyb5r1	ENSMUSG00000026456.18	6181	354	616	471	782		320	616	424	782	34	616	47	782		51.9481	54.22	0.061754	2.27189		5.5195	6.01024	0.122887	0.490746		1	0.161786	3.18932	0.515988
chr1	134415378	134433351	+	Adipor1	ENSMUSG00000026457.14	17973	1204	3674	1449	3645		1166	3674	1412	3645	38	3674	37	3645		31.7365	38.738	0.287605	7.00147		1.0343	1.01509	-0.0270412	-0.0192059		0	0	0	0
chr1	134455531	134491018	+	Klhl12	ENSMUSG00000026455.14	35487	503	2051	538	2003		455	2051	490	2003	48	2051	48	2003		22.1843	24.4633	0.14108	2.279		2.34033	2.39641	0.0341651	0.0560837		0	0	0	0
chr1	134560171	134635285	+	Kdm5b	ENSMUSG00000042207.17	75114	6944	18975	4186	13381		6545	18975	3928	13381	399	18975	258	13381		34.4928	29.3551	-0.232684	-5.1377		2.10277	1.92811	-0.125104	-0.17466		1	0.0133131	2.56931	0.0342055
chr1	134646677	134762593	+	Syt2	ENSMUSG00000026452.15	115916	0	92	9	149		0	92	9	149	0	92	0	149		0.000108696	6.04033	15.762	6.04022		0.000108696	6.7114e-05	-0.695606	-4.15815e-05		5	0.0431347	12.8821	0.111133
chr1	134754658	134955942	-	Ppp1r12b	ENSMUSG00000073557.11	201284	1230	10148	1309	11948		194	10148	230	11948	1036	10148	1079	11948		1.91171	1.92501	0.0100034	0.0133015		10.2089	9.0308	-0.176903	-1.17811		2	0.00993621	5.31482	0.0264046
chr1	134834142	134846415	+	Gm28892	ENSMUSG00000101168.1	12273	13	291	15	331		7	291	7	331	6	291	8	331		2.40553	2.11483	-0.185812	-0.290699		2.06189	2.41695	0.229219	0.355059		0	0	0	0
chr1	134962565	134974162	+	Ube2t	ENSMUSG00000026429.9	11597	462	2037	812	2875		411	2037	759	2875	51	2037	53	2875		20.1767	26.4	0.387845	6.22327		2.50369	1.84348	-0.441621	-0.660205		0	0	0	0
chr1	135108497	135132594	-	Ptprv	ENSMUSG00000097993.7	24097	372	723	450	915		52	723	71	915	320	723	379	915		7.19227	7.75957	0.109531	0.567306		44.26	41.4208	-0.0956502	-2.83926		2	0.0829979	5.67974	0.235703
chr1	135132700	135145317	+	Ptpn7	ENSMUSG00000031506.11	12617	3872	6817	3898	8603		3390	6817	3338	8603	482	6817	560	8603		49.7286	38.8004	-0.358004	-10.9282		7.07056	6.50936	-0.119309	-0.561202		3	0.237774	8.07773	0.640226
chr1	135146824	135156269	+	Arl8a	ENSMUSG00000026426.10	9445	167	372	224	483		153	372	181	483	14	372	43	483		41.129	37.4741	-0.134263	-3.65492		3.76347	8.90271	1.24218	5.13924		0	0	0	0
chr1	135262712	135284084	-	Rnpep	ENSMUSG00000041926.15	21372	788	2483	750	2683		127	2483	112	2683	661	2483	638	2683		5.11478	4.17444	-0.293092	-0.940349		26.621	23.7794	-0.162857	-2.84167		0	0	0	0
chr1	135295213	135313778	-	Timm17a	ENSMUSG00000062580.9	18565	991	1872	1182	2169		62	1872	69	2169	929	1872	1113	2169		3.31197	3.18119	-0.0581217	-0.130777		49.6261	51.314	0.0482535	1.6879		0	0	0	0
chr1	135382312	135430499	-	Ipo9	ENSMUSG00000041879.13	48187	3213	7901	4283	9971		229	7901	310	9971	2984	7901	3973	9971		2.89837	3.10902	0.101218	0.210649		37.7674	39.8456	0.0772783	2.07818		0	0	0	0
chr1	135409622	135414186	-	Gm28277	ENSMUSG00000100620.1	4564	11	446	15	509		7	446	12	509	4	446	3	509		1.56953	2.35758	0.586977	0.788054		0.896883	0.58941	-0.605647	-0.307473		0	0	0	0
chr1	135434580	135607295	-	Nav1	ENSMUSG00000009418.15	172715	60	360	44	253		10	360	10	253	50	360	34	253		2.7778	3.95261	0.508859	1.1748		13.8889	13.4388	-0.0475326	-0.450143		2	0.0115798	5.33723	0.0309019
chr1	135584773	135599948	+	Gm4793	ENSMUSG00000054412.5	15175	2	51	1	44		1	51	0	44	1	51	1	44		1.96098	0.000227272	-13.0749	-1.96075		1.96098	2.27295	0.212993	0.311973		0	0	0	0
chr1	135720061	135752232	+	Csrp1	ENSMUSG00000026421.14	32171	2653	6246	2523	5211		2573	6246	2464	5211	80	6246	59	5211		41.1944	47.2846	0.198923	6.09023		1.28082	1.13222	-0.177912	-0.148599		2	0.0621678	5.12567	0.159326
chr1	135818598	135833342	+	Lad1	ENSMUSG00000041782.14	14744	144	281	35	57		134	281	35	57	10	281	0	57		47.6869	61.4036	0.364731	13.7167		3.55875	0.000175438	-14.3081	-3.55858		2	0.135648	5.12691	0.347729
chr1	135836354	135852260	+	Tnnt2	ENSMUSG00000026414.13	15906	17	68	4	13		15	68	3	13	2	68	1	13		22.0589	23.0775	0.0651245	1.01858		2.94132	7.69302	1.38709	4.7517		0	0	0	0
chr1	135871395	135919207	-	Pkp1	ENSMUSG00000026413.12	47812	17	89	6	19		2	89	0	19	15	89	6	19		2.2473	0.000526313	-12.06	-2.24677		16.854	31.5793	0.905886	14.7253		2	0.0418305	5.31897	0.111248
chr1	136008150	136035342	+	Tmem9	ENSMUSG00000026411.17	27192	213	1584	263	1821		195	1584	237	1821	18	1584	26	1821		12.3106	13.0148	0.0802542	0.70422		1.13637	1.42779	0.329354	0.291422		2	0.073551	5.49267	0.201996
chr1	136131389	136177998	+	Kif21b	ENSMUSG00000041642.18	46609	12270	28349	14702	31725		11375	28349	13659	31725	895	28349	1043	31725		40.1249	43.0544	0.101663	2.9295		3.15708	3.28763	0.0584572	0.13055		1	0.0214551	2.58474	0.0554558
chr1	136181652	136212828	-	Mroh3	ENSMUSG00000087230.10	31176	20	61	13	71		14	61	10	71	6	61	3	71		22.9509	14.0846	-0.704432	-8.86632		9.83621	4.22549	-1.21899	-5.61073		3	0.0962279	7.93426	0.254499
chr1	136213531	136234264	-	Inava	ENSMUSG00000041605.16	20733	24	134	40	244		4	134	12	244	20	134	28	244		2.98515	4.91807	0.720291	1.93292		14.9254	11.4754	-0.379223	-3.44999		0	0	0	0
chr1	136247662	136250476	+	A430034D21Rik	ENSMUSG00000103594.1	2814	12	81	36	231		3	81	16	231	9	81	20	231		3.70382	6.92645	0.903101	3.22262		11.1112	8.65805	-0.359904	-2.45317		0	0	0	0
chr1	136252671	136255846	-	Gm37552	ENSMUSG00000102941.1	3175	39	52	100	144		12	52	32	144	27	52	68	144		23.0771	22.2223	-0.0544535	-0.854795		51.9232	47.2223	-0.136911	-4.70091		0	0	0	0
chr1	136268123	136346104	-	Camsap2	ENSMUSG00000041570.14	77981	941	6474	900	7223		145	6474	156	7223	796	6474	744	7223		2.23973	2.15977	-0.0524477	-0.0799609		12.2953	10.3004	-0.255407	-1.99491		2	0.0256473	5.59553	0.071755
chr1	136415271	136440158	+	Ddx59	ENSMUSG00000026404.12	24887	173	772	257	937		160	772	238	937	13	772	19	937		20.7254	25.4002	0.293441	4.67482		1.68395	2.02776	0.268036	0.343808		1	0.0401816	2.65774	0.106792
chr1	136466343	136531511	+	Kif14	ENSMUSG00000041498.13	65168	1586	3904	2567	6087		1486	3904	2397	6087	100	3904	170	6087		38.0635	39.379	0.0490175	1.31548		2.56148	2.79284	0.124756	0.231361		1	0.015345	2.52159	0.0386937
chr1	136541605	136555873	+	Gm37799	ENSMUSG00000104414.1	14268	5	57	11	87		1	57	8	87	4	57	3	87		1.75456	9.19551	2.38982	7.44095		7.01771	3.44839	-1.02508	-3.56932		0	0	0	0
chr1	136670769	136690804	+	Gm19705	ENSMUSG00000097113.7	20035	151	498	93	319		136	498	84	319	15	498	9	319		27.3093	26.3323	-0.0525556	-0.97694		3.01207	2.82135	-0.09437	-0.190721		1	0.0499127	2.83189	0.141347
chr1	137917690	137921312	-	Gm26979	ENSMUSG00000098045.1	3622	725	21904	641	18960		530	21904	453	18960	195	21904	188	18960		2.41965	2.38924	-0.0182459	-0.0304088		0.890249	0.991562	0.155494	0.101313		0	0	0	0
chr1	137928389	137969240	-	Gm26936	ENSMUSG00000098145.1	40851	259	6795	203	6058		71	6795	54	6058	188	6795	149	6058		1.04489	0.891385	-0.229227	-0.153502		2.76674	2.45956	-0.169788	-0.307182		0	0	0	0
chr1	138062861	138175708	-	Ptprc	ENSMUSG00000026395.16	112847	77795	154447	72482	145312		4533	154447	4167	145312	73262	154447	68315	145312		2.93499	2.86762	-0.0334991	-0.0673646		47.435	47.0126	-0.0129047	-0.422408		5	0.0443078	13.2228	0.117175
chr1	138482875	138620141	-	Nek7	ENSMUSG00000026393.10	137266	848	5382	1123	5661		332	5382	333	5661	516	5382	790	5661		6.16871	5.88235	-0.0685756	-0.286358		9.58752	13.9551	0.541567	4.36762		3	0.0218554	7.91121	0.0576342
chr1	138851983	138856852	-	2310009B15Rik	ENSMUSG00000079283.2	4869	115	483	111	455		15	483	16	455	100	483	95	455		3.10561	3.5165	0.179265	0.410895		20.704	20.8791	0.0121561	0.175188		0	0	0	0
chr1	138963435	139178960	+	Dennd1b	ENSMUSG00000056268.15	215525	2033	13169	1938	12424		1789	13169	1688	12424	244	13169	250	12424		13.5849	13.5866	0.000177583	0.00167229		1.85284	2.01224	0.119063	0.159398		3	0.0139195	7.94075	0.0368438
chr1	138977656	138979246	+	4930596I21Rik	ENSMUSG00000104900.1	1590	94	253	76	252		41	253	21	252	53	253	55	252		16.2056	8.33337	-0.959518	-7.8722		20.9486	21.8254	0.0591528	0.87678		0	0	0	0
chr1	139422288	139453005	+	Zbtb41	ENSMUSG00000033964.12	30717	744	3735	765	4084		623	3735	646	4084	121	3735	119	4084		16.6801	15.8178	-0.0765726	-0.862228		3.23963	2.91381	-0.15292	-0.325815		0	0	0	0
chr1	139454772	139494091	+	Aspm	ENSMUSG00000033952.14	39319	3077	6669	4934	10504		2893	6669	4590	10504	184	6669	344	10504		43.3798	43.6976	0.0105314	0.317822		2.75904	3.27494	0.247306	0.515908		0	0	0	0
chr1	143598800	143702893	-	Cdc73	ENSMUSG00000026361.9	104093	1628	11822	1477	12083		144	11822	145	12083	1484	11822	1332	12083		1.21807	1.20003	-0.0215205	-0.0180349		12.5529	11.0238	-0.187402	-1.52912		1	0.00960679	2.9833	0.0286599
chr1	143640664	143654614	+	B3galt2	ENSMUSG00000033849.3	13950	32	652	32	746		24	652	23	746	8	652	9	746		3.681	3.08312	-0.255704	-0.597873		1.22701	1.20645	-0.0243806	-0.0205615		0	0	0	0
chr1	143716338	143749676	+	Glrx2	ENSMUSG00000018196.18	33338	246	468	247	448		226	468	236	448	20	468	11	448		48.2906	52.6786	0.125474	4.38797		4.27352	2.45538	-0.799481	-1.81815		1	0.0299958	2.60353	0.078095
chr1	143750790	143777068	-	Trove2	ENSMUSG00000018199.9	26278	136	541	165	714		19	541	21	714	117	541	144	714		3.51203	2.94119	-0.255906	-0.570843		21.6266	20.1681	-0.100735	-1.45855		0	0	0	0
chr1	143777272	143807466	+	Uchl5	ENSMUSG00000018189.12	30194	1613	5851	1766	6539		1467	5851	1596	6539	146	5851	170	6539		25.0726	24.4074	-0.038795	-0.665236		2.4953	2.59979	0.0591794	0.104486		1	0.0331192	2.92897	0.097005
chr1	143999338	144004161	-	Rgs2	ENSMUSG00000026360.9	4823	174	261	142	237		17	261	16	237	157	261	126	237		6.51345	6.75109	0.0517004	0.237648		60.1533	53.1646	-0.178178	-6.9887		0	0	0	0
chr1	144752683	144775435	-	Rgs18	ENSMUSG00000026357.3	22752	21	188	25	158		5	188	9	158	16	188	16	158		2.65963	5.69626	1.09879	3.03664		8.51069	10.1266	0.250808	1.61595		0	0	0	0
chr1	146494760	146902472	+	Brinp3	ENSMUSG00000035131.14	407712	0	64	0	4		0	64	0	4	0	64	0	4		0.00015625	0.00249994	3.99997	0.00234369		0.00015625	0.00249994	3.99997	0.00234369		2	0.00490542	5.22077	0.012805
chr1	149829618	149961290	-	Pla2g4a	ENSMUSG00000056220.14	131672	133	1137	189	1432		8	1137	19	1432	125	1137	170	1432		0.703615	1.32682	0.915118	0.623208		10.9939	11.8715	0.110807	0.877663		0	0	0	0
chr1	150361305	150393080	-	Odr4	ENSMUSG00000006010.14	31775	518	1804	629	2027		65	1804	80	2027	453	1804	549	2027		3.60311	3.94672	0.131413	0.343614		25.1109	27.0844	0.109148	1.9735		1	0.0314713	2.59468	0.0816579
chr1	150392838	150449935	+	Tpr	ENSMUSG00000006005.18	57097	18681	32400	20366	33877		17751	32400	19467	33877	930	32400	899	33877		54.787	57.4638	0.068818	2.67673		2.87037	2.65372	-0.113222	-0.216653		1	0.0175141	2.59468	0.0454434
chr1	150449412	150466165	-	Prg4	ENSMUSG00000006014.16	16753	132	422	75	282		84	422	52	282	48	422	23	282		19.9052	18.4397	-0.110329	-1.46549		11.3744	8.15606	-0.47985	-3.21837		0	0	0	0
chr1	150562524	150993435	-	Hmcn1	ENSMUSG00000066842.18	430911	18	77	11	53		3	77	5	53	15	77	6	53		3.89623	9.43413	1.27581	5.5379		19.4806	11.3209	-0.783048	-8.1597		0	0	0	0
chr1	151344477	151364422	+	Ivns1abp	ENSMUSG00000023150.14	19945	10342	18458	10884	19197		9793	18458	10344	19197	549	18458	540	19197		53.0556	53.8834	0.0223368	0.827834		2.97432	2.81294	-0.0804814	-0.161381		3	0.150414	7.9817	0.400186
chr1	151367699	151428455	-	Swt1	ENSMUSG00000052748.14	60756	1161	6400	1289	6373		147	6400	157	6373	1014	6400	1132	6373		2.29688	2.46352	0.101048	0.166643		15.8438	17.7624	0.164916	1.91869		0	0	0	0
chr1	151428542	151458161	+	Trmt1l	ENSMUSG00000053286.11	29619	968	2707	1016	2949		928	2707	959	2949	40	2707	57	2949		34.2815	32.5195	-0.0761249	-1.76199		1.47765	1.93286	0.38743	0.455208		0	0	0	0
chr1	151458004	151500955	-	Rnf2	ENSMUSG00000026484.13	42951	1553	4724	1911	6019		107	4724	117	6019	1446	4724	1794	6019		2.26503	1.94385	-0.220617	-0.321186		30.6097	29.8056	-0.0384025	-0.804038		0	0	0	0
chr1	151571186	151721939	+	Fam129a	ENSMUSG00000026483.13	150753	185	2578	512	7819		167	2578	460	7819	18	2578	52	7819		6.47789	5.88311	-0.138947	-0.594787		0.69822	0.665048	-0.0702223	-0.0331716		2	0.0132667	5.98206	0.0396812
chr1	151755371	151822051	+	Edem3	ENSMUSG00000043019.12	66680	1593	8098	1423	6649		1467	8098	1292	6649	126	8098	131	6649		18.1156	19.4315	0.101165	1.31591		1.55594	1.97022	0.340571	0.414282		0	0	0	0
chr1	151852403	152090125	-	1700025G04Rik	ENSMUSG00000032666.16	237722	142	10014	209	7219		25	10014	12	7219	117	10014	197	7219		0.249651	0.166229	-0.58674	-0.0834221		1.16837	2.72891	1.22383	1.56055		3	0.0126198	8.16853	0.0343617
chr1	152370735	152386688	-	Tsen15	ENSMUSG00000014980.14	15953	132	747	169	867		16	747	21	867	116	747	148	867		2.14191	2.42216	0.177392	0.280243		15.5288	17.0704	0.136548	1.54157		0	0	0	0
chr1	152516760	152766351	-	Rgl1	ENSMUSG00000026482.13	249591	255	2033	299	2212		19	2033	40	2212	236	2033	259	2212		0.934584	1.80832	0.952255	0.873738		11.6085	11.7089	0.012424	0.1004		1	0.00400655	2.92593	0.0117229
chr1	152766542	152775597	+	Arpc5	ENSMUSG00000008475.13	9055	2052	5673	1904	5065		1946	5673	1782	5065	106	5673	122	5065		34.3028	35.1826	0.0365352	0.879788		1.8685	2.40869	0.366366	0.540187		0	0	0	0
chr1	152800194	152836991	+	Ncf2	ENSMUSG00000026480.12	36797	374	1257	367	1197		298	1257	293	1197	76	1257	74	1197		23.7072	24.4779	0.0461498	0.770622		6.04615	6.18213	0.0320874	0.135981		0	0	0	0
chr1	152836995	152902646	-	Smg7	ENSMUSG00000042772.15	65651	4092	14340	4250	14104		418	14340	432	14104	3674	14340	3818	14104		2.91492	3.06296	0.071469	0.148038		25.6206	27.0703	0.0794061	1.44969		0	0	0	0
chr1	152954993	153119261	+	Nmnat2	ENSMUSG00000042751.14	164268	6	97	3	62		6	97	3	62	0	97	0	62		6.18566	4.83886	-0.35426	-1.3468		0.000103093	0.00016129	0.645716	5.81974e-05		3	0.0182628	7.90319	0.0481116
chr1	153122756	153186447	-	Lamc2	ENSMUSG00000026479.13	63691	34	152	12	49		3	152	2	49	31	152	10	49		1.97375	4.08183	1.04828	2.10808		20.3948	20.4083	0.000957232	0.0135365		2	0.0314016	5.12947	0.0805368
chr1	153218922	153332786	-	Lamc1	ENSMUSG00000026478.14	113864	835	2348	849	2622		63	2348	76	2622	772	2348	773	2622		2.68314	2.89855	0.111412	0.215416		32.879	29.4813	-0.157368	-3.39773		0	0	0	0
chr1	153404827	153414233	-	E330020D12Rik	ENSMUSG00000073538.10	9406	241	1726	124	811		46	1726	34	811	195	1726	90	811		2.66513	4.19237	0.653561	1.52724		11.2978	11.0974	-0.0258178	-0.200382		0	0	0	0
chr1	153425162	153452574	+	Shcbp1l	ENSMUSG00000042708.12	27412	56	396	40	332		48	396	27	332	8	396	13	332		12.1212	8.13256	-0.575756	-3.98868		2.02023	3.91569	0.95475	1.89546		2	0.0729607	5.40231	0.197078
chr1	153455758	153487660	-	Dhx9	ENSMUSG00000042699.11	31902	12725	26347	12617	26960		1118	26347	1279	26960	11607	26347	11338	26960		4.24337	4.74407	0.160914	0.500698		44.0544	42.0549	-0.0670108	-1.99946		1	0.031346	2.83439	0.0888468
chr1	153503015	153550045	-	Npl	ENSMUSG00000042684.8	47030	96	224	103	203		3	224	6	203	93	224	97	203		1.33933	2.95571	1.14199	1.61638		41.5179	47.7833	0.202773	6.26539		1	0.021263	2.79879	0.0595107
chr1	153749426	153764221	+	Rnasel	ENSMUSG00000066800.11	14795	502	1620	1003	2935		430	1620	860	2935	72	1620	143	2935		26.5432	29.3015	0.142633	2.75832		4.44445	4.87223	0.132579	0.427785		1	0.0675904	2.81119	0.190009
chr1	153779381	153844142	-	Rgsl1	ENSMUSG00000042641.18	64761	41	350	42	489		12	350	14	489	29	350	28	489		3.4286	2.86301	-0.260089	-0.565593		8.28574	5.72599	-0.533105	-2.55975		1	0.0154414	2.60353	0.0402021
chr1	153849542	153900228	-	Teddm2	ENSMUSG00000045968.7	50686	9	509	11	828		8	509	11	828	1	509	0	828		1.57173	1.32851	-0.242538	-0.243214		0.196483	1.20773e-05	-13.9898	-0.196471		2	0.0394586	5.52208	0.108947
chr1	153899944	153909723	+	Glul	ENSMUSG00000026473.15	9779	1726	2469	2240	3058		1637	2469	2117	3058	89	2469	123	3058		66.3021	69.2283	0.0623054	2.92611		3.6047	4.02224	0.158119	0.417538		0	0	0	0
chr1	154390731	154884501	-	Cacna1e	ENSMUSG00000004110.16	493770	3562	51530	1028	14561		464	51530	115	14561	3098	51530	913	14561		0.900447	0.789782	-0.189187	-0.110665		6.01203	6.27017	0.0606529	0.258142		4	0.00810094	10.861	0.0219962
chr1	155011332	155057179	-	Gm29282	ENSMUSG00000101880.1	45847	2	94	1	87		1	94	0	87	1	94	1	87		1.06394	0.000114942	-13.1762	-1.06382		1.06394	1.14954	0.111645	0.0856039		2	0.0436234	5.42243	0.118272
chr1	155063447	155083266	-	Gm9530	ENSMUSG00000096950.2	19819	11	103	24	124		3	103	11	124	8	103	13	124		2.91272	8.87104	1.60674	5.95833		7.76708	10.4839	0.432737	2.71686		0	0	0	0
chr1	155127277	155146814	-	Mr1	ENSMUSG00000026471.14	19537	1248	5601	967	5108		119	5601	129	5108	1129	5601	838	5108		2.12462	2.52545	0.249335	0.40083		20.1571	16.4056	-0.297097	-3.75148		0	0	0	0
chr1	155158715	155208256	+	Stx6	ENSMUSG00000026470.14	49541	3698	25132	3631	25094		3248	25132	3149	25094	450	25132	482	25094		12.9238	12.5488	-0.0424748	-0.374946		1.79055	1.92078	0.101291	0.130232		1	0.0201853	2.63907	0.0532704
chr1	155212471	155244444	-	BC034090	ENSMUSG00000033722.9	31973	38	440	44	604		21	440	33	604	17	440	11	604		4.77275	5.46359	0.195029	0.690843		3.86366	1.82121	-1.08507	-2.04245		1	0.0312764	2.5817	0.0807463
chr1	155275701	155417415	-	Xpr1	ENSMUSG00000026469.14	141714	977	14216	825	12820		98	14216	106	12820	879	14216	719	12820		0.689365	0.826834	0.26233	0.137469		6.18317	5.60843	-0.140752	-0.574749		1	0.00705647	3.01907	0.021304
chr1	155558120	155691330	+	Acbd6	ENSMUSG00000033701.13	133210	384	8826	440	10062		311	8826	356	10062	73	8826	84	10062		3.52368	3.53806	0.00587716	0.0143838		0.827103	0.834825	0.0134072	0.00772221		0	0	0	0
chr1	155776029	155812889	-	Qsox1	ENSMUSG00000033684.14	36860	603	2170	612	2490		54	2170	70	2490	549	2170	542	2490		2.48848	2.81125	0.175944	0.322765		25.2995	21.7671	-0.216964	-3.53247		2	0.0542594	5.59758	0.151861
chr1	155844964	155973255	-	Cep350	ENSMUSG00000033671.18	128291	5391	19580	6007	20391		512	19580	582	20391	4879	19580	5425	20391		2.61491	2.8542	0.126324	0.239287		24.9183	26.6049	0.0944859	1.68659		4	0.0311791	10.5439	0.0821873
chr1	156004599	156036480	-	Tor1aip1	ENSMUSG00000026466.16	31881	1875	7431	2361	10128		159	7431	218	10128	1716	7431	2143	10128		2.13969	2.15245	0.00858009	0.0127632		23.0925	21.1592	-0.126139	-1.93329		1	0.0313666	2.63907	0.0827788
chr1	156035403	156068861	+	Tor1aip2	ENSMUSG00000050565.16	33458	718	9417	791	11588		528	9417	586	11588	190	9417	205	11588		5.60688	5.05696	-0.148929	-0.549926		2.01763	1.76907	-0.189668	-0.248556		3	0.0896647	8.12976	0.242984
chr1	156255296	156303664	-	Tdrd5	ENSMUSG00000060985.15	48368	3684	17334	2765	12023		513	17334	373	12023	3171	17334	2392	12023		2.9595	3.10239	0.0680246	0.142886		18.2935	19.8952	0.121087	1.60167		3	0.0620245	7.993	0.165254
chr1	156310727	156328035	+	Nphs2	ENSMUSG00000026602.9	17308	112	742	69	437		87	742	46	437	25	742	23	437		11.7251	10.5263	-0.155594	-1.19874		3.36929	5.26318	0.643492	1.89389		0	0	0	0
chr1	156323509	156421159	-	Axdnd1	ENSMUSG00000026601.14	97650	1398	6573	1393	6269		188	6573	256	6269	1210	6573	1137	6269		2.86019	4.08359	0.513728	1.2234		18.4086	18.1369	-0.0214581	-0.271777		4	0.0409626	10.5009	0.107537
chr1	156424525	156474331	-	Soat1	ENSMUSG00000026600.12	49806	3341	8007	3818	9269		211	8007	229	9269	3130	8007	3589	9269		2.6352	2.4706	-0.0930473	-0.164593		39.0908	38.7205	-0.0137326	-0.37033		0	0	0	0
chr1	156558786	156649568	+	Abl2	ENSMUSG00000026596.13	90782	638	2995	1040	3873		576	2995	981	3873	62	2995	59	3873		19.2321	25.3292	0.397289	6.09715		2.07012	1.52337	-0.442449	-0.546751		1	0.0110154	2.63499	0.0290255
chr1	156653617	156674356	-	Tor3a	ENSMUSG00000060519.11	20739	105	898	251	1910		25	898	62	1910	80	898	189	1910		2.78398	3.24608	0.221551	0.462103		8.9087	9.89529	0.151528	0.986597		1	0.0482183	2.61158	0.125926
chr1	156678532	156719086	-	Fam20b	ENSMUSG00000033557.17	40554	254	2116	538	3139		21	2116	41	3139	233	2116	497	3139		0.992443	1.30615	0.396266	0.313708		11.0113	15.8331	0.52395	4.82172		3	0.0739754	7.85984	0.193812
chr1	156804166	156939626	-	Ralgps2	ENSMUSG00000026594.14	135460	2810	18428	3402	19673		372	18428	379	19673	2438	18428	3023	19673		2.01867	1.9265	-0.0674223	-0.092169		13.2299	15.3662	0.215965	2.13637		1	0.00738225	2.84759	0.0210216
chr1	156838562	156861078	+	Angptl1	ENSMUSG00000033544.6	22516	155	2267	160	2233		104	2267	89	2233	51	2267	71	2233		4.58756	3.98567	-0.202905	-0.601891		2.24967	3.17958	0.499122	0.92991		0	0	0	0
chr1	156972760	157054034	-	Gm28694	ENSMUSG00000101768.1	81274	1	99	0	179		0	99	0	179	1	99	0	179		0.00010101	5.58659e-05	-0.854459	-4.51441e-05		1.0102	5.58659e-05	-14.1423	-1.01015		3	0.0369122	7.68742	0.0945865
chr1	157135182	157412595	-	Rasal2	ENSMUSG00000070565.11	277413	32	521	29	325		8	521	3	325	24	521	26	325		1.53553	0.923107	-0.734164	-0.61242		4.60654	8.00003	0.79632	3.39348		1	0.00360473	2.7337	0.00985426
chr1	157458577	157492638	+	Cryzl2	ENSMUSG00000033488.11	34061	37	161	41	168		31	161	35	168	6	161	6	168		19.2547	20.8334	0.113686	1.57867		3.72677	3.57149	-0.0614005	-0.155282		1	0.0293591	2.56111	0.0751919
chr1	158711727	158980490	-	Pappa2	ENSMUSG00000073530.11	268763	5	69	2	26		1	69	1	26	4	69	1	26		1.44942	3.84652	1.40808	2.39711		5.79724	3.84652	-0.591811	-1.95071		0	0	0	0
chr1	159232320	159347640	+	Cop1	ENSMUSG00000040782.12	115320	3091	19081	2774	17860		2787	19081	2517	17860	304	19081	257	17860		14.6062	14.0929	-0.0516031	-0.513208		1.59321	1.43897	-0.146898	-0.154238		0	0	0	0
chr1	159523769	159931729	+	Tnr	ENSMUSG00000015829.13	407960	15	900	33	2655		11	900	18	2655	4	900	15	2655		1.22223	0.67797	-0.850227	-0.544263		0.444456	0.564975	0.346149	0.12052		3	0.00735366	8.26619	0.0202623
chr1	160044382	160080208	+	4930523C07Rik	ENSMUSG00000090394.8	35826	286	8308	572	14188		231	8308	473	14188	55	8308	99	14188		2.78045	3.3338	0.261849	0.55335		0.662014	0.697773	0.0758976	0.0357598		1	0.0279127	2.53844	0.0708547
chr1	160074735	160077985	-	4930562F07Rik	ENSMUSG00000026729.9	3250	251	616	441	1103		148	616	271	1103	103	616	170	1103		24.026	24.5694	0.0322648	0.543377		16.7208	15.4125	-0.117541	-1.30827		0	0	0	0
chr1	160195215	160202170	+	Mrps14	ENSMUSG00000058267.13	6955	440	1018	439	949		424	1018	415	949	16	1018	24	949		41.6503	43.7302	0.0703046	2.07995		1.57172	2.52899	0.686217	0.957269		0	0	0	0
chr1	160202367	160212875	-	Cacybp	ENSMUSG00000014226.10	10508	1933	4018	1951	3716		96	4018	89	3716	1837	4018	1862	3716		2.38925	2.39505	0.00349811	0.00580025		45.7193	50.1076	0.132229	4.38838		1	0.0951656	2.5817	0.245689
chr1	160219174	160793211	-	Rabgap1l	ENSMUSG00000026721.16	574037	2784	22322	4435	30187		775	22322	1266	30187	2009	22322	3169	30187		3.47191	4.19386	0.272548	0.721947		9.00009	10.4979	0.222089	1.49781		0	0	0	0
chr1	160264324	160443072	+	Gm36975	ENSMUSG00000104302.1	178748	166	3580	211	4953		98	3580	114	4953	68	3580	97	4953		2.73743	2.30164	-0.250163	-0.435796		1.89944	1.95841	0.0441063	0.0589669		0	0	0	0
chr1	160321686	160327078	-	Gm37529	ENSMUSG00000103693.1	5392	16	68	18	86		11	68	10	86	5	68	8	86		16.1766	11.628	-0.476304	-4.54858		7.35308	9.30243	0.33926	1.94935		0	0	0	0
chr1	160906418	160974978	+	Rc3h1	ENSMUSG00000040423.10	68560	4297	11313	4178	10738		4070	11313	3938	10738	227	11313	240	10738		35.9763	36.6735	0.0276906	0.697186		2.00654	2.23505	0.155598	0.228512		1	0.0145858	2.66861	0.0389237
chr1	160978585	161005863	+	Serpinc1	ENSMUSG00000026715.12	27278	23	252	16	173		17	252	10	173	6	252	6	173		6.74607	5.7804	-0.222877	-0.965667		2.38099	3.46826	0.542651	1.08727		0	0	0	0
chr1	161002922	161034849	-	Zbtb37	ENSMUSG00000043467.19	31927	112	747	133	884		36	747	44	884	76	747	89	884		4.81929	4.97739	0.0465678	0.158096		10.174	10.0679	-0.0151325	-0.106158		0	0	0	0
chr1	161034422	161038539	+	Gas5	ENSMUSG00000053332.13	4117	1135	1263	1009	1142		947	1263	866	1142	188	1263	143	1142		74.9802	75.8319	0.0162946	0.851668		14.8852	12.5219	-0.249425	-2.3633		0	0	0	0
chr1	161040601	161070658	-	Dars2	ENSMUSG00000026709.10	30057	671	1392	1008	1792		28	1392	38	1792	643	1392	970	1792		2.0115	2.12054	0.0761598	0.10904		46.1925	54.1295	0.228755	7.93693		0	0	0	0
chr1	161070713	161086724	+	Cenpl	ENSMUSG00000026708.16	16011	370	1925	494	2608		332	1925	413	2608	38	1925	81	2608		17.2468	15.8359	-0.123127	-1.41086		1.97403	3.10583	0.653835	1.1318		0	0	0	0
chr1	161088375	161131511	-	Klhl20	ENSMUSG00000026705.16	43136	532	3063	508	2930		54	3063	79	2930	478	3063	429	2930		1.76298	2.69625	0.612937	0.933268		15.6056	14.6416	-0.0919882	-0.963977		0	0	0	0
chr1	161176936	161237307	+	Gm6185	ENSMUSG00000102817.2	60371	49	346	31	282		21	346	20	282	28	346	11	282		6.06939	7.09223	0.224688	1.02284		8.09251	3.90074	-1.05284	-4.19177		2	0.0331285	5.15685	0.0854193
chr1	161240112	161251219	-	Prdx6	ENSMUSG00000026701.15	11107	1379	2622	1278	2315		38	2622	48	2315	1341	2622	1230	2315		1.44928	2.07344	0.51669	0.624159		51.1442	53.1318	0.0550046	1.98758		1	0.0900333	2.69644	0.242769
chr1	161395409	161418410	+	Tnfsf4	ENSMUSG00000026700.4	23001	7	50	7	178		7	50	6	178	0	50	1	178		14.0002	3.37084	-2.05426	-10.6293		0.0002	0.561854	11.456	0.561654		0	0	0	0
chr1	161726242	161727489	-	Gm15429	ENSMUSG00000040323.13	1247	36	65	23	49		19	65	13	49	17	65	10	49		29.2309	26.5308	-0.139827	-2.70012		26.154	20.4083	-0.357872	-5.74563		0	0	0	0
chr1	161780689	161788495	-	Fasl	ENSMUSG00000000817.10	7806	21	164	46	295		6	164	4	295	15	164	42	295		3.6586	1.35597	-1.43197	-2.30263		9.1464	14.2373	0.638402	5.09092		0	0	0	0
chr1	161816114	161876682	-	Suco	ENSMUSG00000040297.12	60568	3140	13311	3258	13469		386	13311	412	13469	2754	13311	2846	13469		2.89986	3.05888	0.0770197	0.159019		20.6897	21.13	0.0303833	0.440347		0	0	0	0
chr1	161821865	161823068	+	Gm7496	ENSMUSG00000102254.1	1203	45	68	51	80		27	68	22	80	18	68	29	80		39.706	27.5001	-0.52992	-12.2059		26.4707	36.2501	0.453588	9.77938		0	0	0	0
chr1	161982453	162478034	-	Dnm3	ENSMUSG00000040265.16	495581	13	210	6	169		4	210	1	169	9	210	5	169		1.90481	0.591775	-1.68653	-1.31303		4.28576	2.95864	-0.534618	-1.32712		3	0.0060535	8.65673	0.0174678
chr1	162532127	162548551	-	Mettl13	ENSMUSG00000026694.19	16424	98	311	108	336		14	311	14	336	84	311	94	336		4.50164	4.1667	-0.111547	-0.334943		27.0097	27.9762	0.0507246	0.966542		0	0	0	0
chr1	162570515	162599084	+	Vamp4	ENSMUSG00000026696.15	28569	1277	5735	1563	6278		1118	5735	1384	6278	159	5735	179	6278		19.4943	22.0452	0.177412	2.5509		2.77245	2.85123	0.0404212	0.0787765		2	0.070006	5.62238	0.1968
chr1	162670725	162740556	-	Prrc2c	ENSMUSG00000040225.15	69831	15013	50157	16162	49938		1643	50157	1596	49938	13370	50157	14566	49938		3.27571	3.19596	-0.0355588	-0.0797513		26.6563	29.1682	0.129918	2.51187		2	0.0286406	5.48124	0.0784929
chr1	163384908	163403669	-	Gorab	ENSMUSG00000040124.5	18761	80	1009	85	1160		36	1009	30	1160	44	1009	55	1160		3.5679	2.58622	-0.464232	-0.981683		4.36076	4.74139	0.120729	0.380625		0	0	0	0
chr1	163779583	163917109	+	Kifap3	ENSMUSG00000026585.13	137526	700	3670	683	4827		668	3670	652	4827	32	3670	31	4827		18.2016	13.5074	-0.430323	-4.69428		0.871937	0.642223	-0.44115	-0.229714		1	0.00727135	2.5817	0.0187725
chr1	163929100	163955126	+	Scyl3	ENSMUSG00000026584.14	26026	1179	6139	1258	5980		913	6139	997	5980	266	6139	261	5980		14.8721	16.6722	0.164837	1.80011		4.33295	4.36455	0.0104818	0.0315953		0	0	0	0
chr1	163945993	163994796	-	BC055324	ENSMUSG00000041406.14	48803	1316	3810	1941	5175		223	3810	299	5175	1093	3810	1642	5175		5.85302	5.77778	-0.0186662	-0.0752412		28.6877	31.7295	0.145393	3.0418		0	0	0	0
chr1	163994889	163997243	+	Mettl18	ENSMUSG00000041396.13	2354	96	255	89	233		61	255	47	233	35	255	42	233		23.9216	20.1717	-0.245981	-3.74989		13.7255	18.0258	0.393201	4.30026		0	0	0	0
chr1	164048234	164057677	+	Sele	ENSMUSG00000026582.6	9443	22	72	12	68		19	72	8	68	3	72	4	68		26.389	11.7648	-1.16546	-14.6242		4.1668	5.88249	0.497488	1.71569		0	0	0	0
chr1	164061982	164084181	+	Sell	ENSMUSG00000026581.14	22199	3837	12409	3433	11158		3425	12409	3076	11158	412	12409	357	11158		27.6009	27.5677	-0.00174008	-0.0332703		3.32017	3.1995	-0.0534118	-0.120673		0	0	0	0
chr1	164151838	164220277	+	F5	ENSMUSG00000026579.8	68439	36	97	56	173		33	97	47	173	3	97	9	173		34.0207	27.1677	-0.324521	-6.85301		3.09288	5.20237	0.750216	2.10948		1	0.0146116	3.27155	0.0478024
chr1	164249046	164265385	+	Slc19a2	ENSMUSG00000040918.12	16339	53	506	62	614		42	506	52	614	11	506	10	614		8.30041	8.46907	0.0290204	0.168657		2.17393	1.62868	-0.416603	-0.545252		0	0	0	0
chr1	164275585	164287847	+	Ccdc181	ENSMUSG00000026578.6	12262	193	698	232	802		176	698	210	802	17	698	22	802		25.2149	26.1845	0.0544386	0.969637		2.43554	2.74315	0.171592	0.30761		0	0	0	0
chr1	164289800	164307489	-	Blzf1	ENSMUSG00000026577.13	17689	307	988	278	848		50	988	39	848	257	988	239	848		5.06074	4.59907	-0.138006	-0.461671		26.0122	28.184	0.115689	2.17182		0	0	0	0
chr1	164304121	164437725	+	Nme7	ENSMUSG00000026575.15	133604	713	4500	810	4785		674	4500	759	4785	39	4500	51	4785		14.9778	15.8621	0.0827573	0.884291		0.866669	1.06583	0.298428	0.199164		1	0.00748481	2.7337	0.0204612
chr1	164437109	164458355	-	Atp1b1	ENSMUSG00000026576.12	21246	870	5627	490	3110		145	5627	109	3110	725	5627	381	3110		2.57686	3.50483	0.443727	0.927963		12.8843	12.2508	-0.0727385	-0.633503		3	0.141203	8.17156	0.384616
chr1	165137855	165160773	-	Tbx19	ENSMUSG00000026572.11	22918	73	401	102	573		20	401	24	573	53	401	78	573		4.98755	4.1885	-0.2519	-0.799056		13.217	13.6126	0.0425481	0.395601		2	0.0872676	5.70322	0.248853
chr1	165174337	165194438	-	Sft2d2	ENSMUSG00000040848.11	20101	1527	4940	1454	4511		157	4940	142	4511	1370	4940	1312	4511		3.17814	3.14786	-0.0138098	-0.0302767		27.7328	29.0845	0.0686556	1.35167		1	0.0497488	2.53844	0.126284
chr1	165212286	165236996	-	Tiprl	ENSMUSG00000040843.10	24710	719	2429	834	2593		109	2429	95	2593	610	2429	739	2593		4.48745	3.66371	-0.292588	-0.823734		25.1132	28.4998	0.182505	3.38659		1	0.0404694	2.69681	0.109138
chr1	165328698	165460475	-	Dcaf6	ENSMUSG00000026571.12	131777	2026	9471	1782	9431		242	9471	268	9431	1784	9471	1514	9431		2.55517	2.84169	0.153332	0.286524		18.8364	16.0534	-0.230644	-2.78301		0	0	0	0
chr1	165460637	165481214	+	Mpc2	ENSMUSG00000026568.6	20577	578	1170	628	1275		569	1170	616	1275	9	1170	12	1275		48.6325	48.3137	-0.00948703	-0.318753		0.769239	0.941184	0.291045	0.171945		2	0.0971959	5.49471	0.267032
chr1	165485183	165576774	+	Adcy10	ENSMUSG00000026567.16	91591	8	84	6	85		7	84	3	85	1	84	3	85		8.33344	3.52953	-1.23944	-4.80392		1.19059	3.52953	1.56779	2.33893		2	0.0218362	5.46741	0.0596937
chr1	165592240	165634538	-	Mpzl1	ENSMUSG00000026566.15	42298	3	96	3	77		3	96	1	77	0	96	2	77		3.1251	1.29883	-1.26669	-1.82627		0.000104167	2.59753	14.606	2.59742		2	0.0472836	5.43776	0.128558
chr1	165646516	165709757	-	Rcsd1	ENSMUSG00000040723.14	63241	4463	18384	4767	18321		310	18384	342	18321	4153	18384	4425	18321		1.68625	1.86671	0.146681	0.180461		22.5903	24.1526	0.096476	1.56232		3	0.0474376	8.33008	0.13172
chr1	165763746	165775308	+	Creg1	ENSMUSG00000040713.12	11562	229	476	318	494		223	476	308	494	6	476	10	494		46.8488	62.3482	0.412337	15.4994		1.26052	2.02431	0.683407	0.763786		0	0	0	0
chr1	165781075	165789367	+	Gm16565	ENSMUSG00000089829.2	8292	30	124	38	140		20	124	24	140	10	124	14	140		16.1291	17.1429	0.0879466	1.01382		8.06459	10.0001	0.310336	1.93547		1	0.120598	3.12423	0.376776
chr1	165788681	165877277	+	Cd247	ENSMUSG00000005763.15	88596	8942	19200	6619	15318		8270	19200	6045	15318	672	19200	574	15318		43.0729	39.4634	-0.126267	-3.60954		3.5	3.74723	0.0984679	0.247226		1	0.0112872	2.52288	0.0284762
chr1	165865154	166002678	-	Pou2f1	ENSMUSG00000026565.18	137524	746	20206	1014	26559		188	20206	234	26559	558	20206	780	26559		0.930417	0.881058	-0.0786414	-0.0493596		2.76156	2.93686	0.0887919	0.175301		0	0	0	0
chr1	166002960	166038256	+	Gm26665	ENSMUSG00000097196.2	35296	2	389	2	334		0	389	1	334	2	389	1	334		2.57069e-05	0.299431	13.5078	0.299405		0.514164	0.299431	-0.780006	-0.214733		0	0	0	0
chr1	166379097	166393621	+	Tada1	ENSMUSG00000026563.13	14524	578	1408	563	1340		535	1408	518	1340	43	1408	45	1340		37.9972	38.6567	0.0248275	0.659558		3.05398	3.35822	0.137003	0.304232		0	0	0	0
chr1	166384622	166409863	-	Pogk	ENSMUSG00000040596.15	25241	106	404	115	376		19	404	14	376	87	404	101	376		4.70299	3.72343	-0.336947	-0.979564		21.5347	26.8617	0.31889	5.32705		0	0	0	0
chr1	167001417	167091302	+	Fam78b	ENSMUSG00000060568.14	89885	1	344	0	139		1	344	0	139	0	344	0	139		0.290727	7.19424e-05	-11.9805	-0.290655		2.90698e-05	7.19424e-05	1.30732	4.28726e-05		2	0.0222507	5.15726	0.0573762
chr1	167222883	167285320	-	Uck2	ENSMUSG00000026558.13	62437	2526	10865	1954	9440		147	10865	151	9440	2379	10865	1803	9440		1.35297	1.59958	0.241562	0.246608		21.896	19.0996	-0.197126	-2.79642		5	0.0800807	13.572	0.21737
chr1	167242457	167251492	+	Gm37982	ENSMUSG00000103139.1	9035	96	1684	84	1373		50	1684	46	1373	46	1684	38	1373		2.96913	3.35033	0.174267	0.381208		2.7316	2.76767	0.0189267	0.0360719		0	0	0	0
chr1	167308378	167333978	+	Tmco1	ENSMUSG00000052428.10	25600	1262	2934	1469	3106		1206	2934	1425	3106	56	2934	44	3106		41.1043	45.8789	0.158543	4.77465		1.90866	1.41662	-0.430112	-0.492044		1	0.0390625	3.31949	0.129668
chr1	167349991	167368532	+	Aldh9a1	ENSMUSG00000026687.14	18541	1237	2182	1332	2300		1179	2182	1266	2300	58	2182	66	2300		54.033	55.0435	0.0267309	1.01048		2.65812	2.86957	0.11043	0.211453		1	0.0539345	2.86388	0.154462
chr1	167371966	167393841	-	Mgst3	ENSMUSG00000026688.5	21875	379	989	409	1095		11	989	7	1095	368	989	402	1095		1.11224	0.639278	-0.798958	-0.472966		37.2093	36.7123	-0.0193987	-0.496974		1	0.0457143	2.50621	0.11457
chr1	168119364	168432270	-	Pbx1	ENSMUSG00000052534.15	312906	10	178	5	87		3	178	0	87	7	178	5	87		1.68545	0.000114942	-13.8399	-1.68533		3.93264	5.74723	0.547371	1.8146		0	0	0	0
chr1	169497934	169531464	-	Nuf2	ENSMUSG00000026683.14	33530	1850	3750	2718	5400		70	3750	83	5400	1780	3750	2635	5400		1.86667	1.53704	-0.280313	-0.32963		47.4667	48.7963	0.0398569	1.32963		1	0.029824	2.7337	0.08153
chr1	169949535	169969241	-	Hsd17b7	ENSMUSG00000026675.12	19706	77	269	97	282		9	269	9	282	68	269	88	282		3.34576	3.19152	-0.068089	-0.154237		25.2788	31.2057	0.303879	5.92686		0	0	0	0
chr1	169972307	170110762	-	Ddr2	ENSMUSG00000026674.9	138455	4	72	3	47		0	72	1	47	4	72	2	47		0.000138889	2.12787	13.9032	2.12773		5.55569	4.25552	-0.384629	-1.30016		0	0	0	0
chr1	170141938	170174957	-	Uap1	ENSMUSG00000026670.15	33019	623	2455	678	2361		39	2455	66	2361	584	2455	612	2361		1.5886	2.79543	0.815315	1.20683		23.7882	25.9212	0.123888	2.13303		2	0.0605712	5.3154	0.16098
chr1	170193420	170215397	-	Uhmk1	ENSMUSG00000026667.14	21977	1151	3805	1155	3839		132	3805	122	3839	1019	3805	1033	3839		3.46912	3.17791	-0.126491	-0.291209		26.7806	26.9081	0.00685209	0.127497		0	0	0	0
chr1	170302668	170589861	-	Nos1ap	ENSMUSG00000038473.14	287193	16	857	2	382		6	857	0	382	10	857	2	382		0.700128	2.6178e-05	-14.707	-0.700102		1.16687	0.523586	-1.15615	-0.643286		0	0	0	0
chr1	170704674	170867771	-	Atf6	ENSMUSG00000026663.6	163097	469	3244	412	2895		18	3244	31	2895	451	3244	381	2895		0.554874	1.07082	0.948478	0.515942		13.9026	13.1606	-0.0791259	-0.741967		1	0.00613132	2.5817	0.0158292
chr1	170873498	170885540	-	Dusp12	ENSMUSG00000026659.13	12042	243	1069	288	1294		40	1069	46	1294	203	1069	242	1294		3.74182	3.55488	-0.0739424	-0.186948		18.9897	18.7017	-0.0220485	-0.288011		0	0	0	0
chr1	170958617	170976547	-	Fcgr2b	ENSMUSG00000026656.15	17930	39	179	95	353		10	179	8	353	29	179	87	353		5.58664	2.26632	-1.30163	-3.32033		16.2012	24.6459	0.605251	8.44475		1	0.0557724	2.92593	0.163186
chr1	171051174	171064935	-	Fcgr3	ENSMUSG00000059498.13	13761	65	106	77	116		2	106	1	116	63	106	76	116		1.88689	0.862154	-1.12999	-1.02473		59.434	65.5173	0.140587	6.08327		0	0	0	0
chr1	171113918	171126967	+	Cfap126	ENSMUSG00000026649.14	13049	35	111	31	97		19	111	21	97	16	111	10	97		17.1172	21.6496	0.338892	4.53237		14.4145	10.3094	-0.483564	-4.10512		1	0.0766342	2.59146	0.198595
chr1	171127165	171150603	-	Sdhc	ENSMUSG00000058076.12	23438	1261	3713	1236	3448		38	3713	30	3448	1223	3713	1206	3448		1.02343	0.870072	-0.23421	-0.153361		32.9383	34.9768	0.086631	2.03847		1	0.0426658	2.69644	0.115046
chr1	171216011	171222514	-	Tomm40l	ENSMUSG00000005674.9	6503	705	756	841	910		65	756	50	910	640	756	791	910		8.5979	5.49452	-0.645991	-3.10338		84.6561	86.9231	0.0381255	2.26699		0	0	0	0
chr1	171229572	171234365	-	Fcer1g	ENSMUSG00000058715.11	4793	91	227	96	197		9	227	13	197	82	227	83	197		3.9648	6.59903	0.735006	2.63423		36.1234	42.132	0.221984	6.00863		1	0.208638	2.58326	0.538965
chr1	171234853	171251388	-	Ndufs2	ENSMUSG00000013593.12	16535	5327	6409	5377	6310		185	6409	192	6310	5142	6409	5185	6310		2.88657	3.04279	0.0760403	0.156223		80.2309	82.1712	0.0344736	1.94023		0	0	0	0
chr1	171270328	171276896	+	B4galt3	ENSMUSG00000052423.14	6568	165	314	184	323		131	314	128	323	34	314	56	323		41.7198	39.6285	-0.0741926	-2.09126		10.8281	17.3375	0.679121	6.50943		2	0.304507	5.6898	0.866291
chr1	171275990	171281186	-	Ppox	ENSMUSG00000062729.11	5196	521	544	631	647		41	544	60	647	480	544	571	647		7.53678	9.27358	0.299178	1.7368		88.2353	88.2535	0.000297273	0.0181831		0	0	0	0
chr1	171281945	171287991	-	Usp21	ENSMUSG00000053483.13	6046	148	284	173	335		31	284	37	335	117	284	136	335		10.9155	11.0448	0.0169862	0.129278		41.1972	40.597	-0.0211721	-0.600171		0	0	0	0
chr1	171288563	171295024	-	Ufc1	ENSMUSG00000062963.10	6461	538	1096	598	1215		26	1096	37	1215	512	1096	561	1215		2.37227	3.04528	0.360303	0.673004		46.7153	46.1728	-0.0168516	-0.542489		0	0	0	0
chr1	171329145	171342331	+	Dedd	ENSMUSG00000013973.12	13186	552	2613	536	2663		366	2613	350	2663	186	2613	186	2663		14.0069	13.1431	-0.091834	-0.863817		7.11826	6.98461	-0.0273453	-0.133651		1	0.075838	2.86388	0.217191
chr1	171338008	171345646	-	Nit1	ENSMUSG00000013997.10	7638	424	786	445	843		165	786	189	843	259	786	256	843		20.9924	22.4199	0.0949168	1.42756		32.9517	30.3677	-0.117812	-2.58392		3	0.392773	7.96356	1.04262
chr1	171345670	171359254	+	Pfdn2	ENSMUSG00000006412.10	13584	213	468	272	547		204	468	257	547	9	468	15	547		43.5898	46.9836	0.108167	3.3938		1.9231	2.74225	0.511927	0.81915		0	0	0	0
chr1	171358446	171360798	-	Klhdc9	ENSMUSG00000045259.4	2352	46	145	43	156		39	145	31	156	7	145	12	156		26.8966	19.8718	-0.436698	-7.02476		4.82765	7.69237	0.672106	2.86472		0	0	0	0
chr1	171370099	171388598	+	Nectin4	ENSMUSG00000006411.12	18499	18	73	10	60		14	73	8	60	4	73	2	60		19.1782	13.3335	-0.524414	-5.84472		5.47958	3.33349	-0.71703	-2.14609		2	0.108114	5.40144	0.291986
chr1	171388954	171410298	+	Arhgap30	ENSMUSG00000048865.16	21344	4612	18321	4686	18480		3998	18321	4053	18480	614	18321	633	18480		21.822	21.9318	0.0072452	0.109865		3.35135	3.42533	0.0315003	0.0739792		0	0	0	0
chr1	171411313	171419142	+	Usf1	ENSMUSG00000026641.13	7829	1345	2259	1495	2472		1248	2259	1397	2472	97	2259	98	2472		55.2457	56.5129	0.0327196	1.26726		4.29394	3.96441	-0.115197	-0.329534		1	0.12773	2.92985	0.37423
chr1	171418872	171420352	+	Tstd1	ENSMUSG00000103711.1	1480	138	187	120	186		63	187	57	186	75	187	63	186		33.6899	30.6452	-0.136654	-3.04468		40.107	33.871	-0.243803	-6.23598		0	0	0	0
chr1	171437535	171464603	+	F11r	ENSMUSG00000038235.4	27068	43	248	13	88		37	248	10	88	6	248	3	88		14.9194	11.3637	-0.392751	-3.55565		2.41939	3.4092	0.494788	0.989806		1	0.036944	2.81797	0.104107
chr1	171559193	171609746	+	Cd244a	ENSMUSG00000004709.14	50553	53	198	54	289		43	198	42	289	10	198	12	289		21.7172	14.5329	-0.579516	-7.18431		5.05055	4.15228	-0.282537	-0.898271		0	0	0	0
chr1	171588624	171607410	-	Ly9	ENSMUSG00000004707.14	18786	1448	3947	1187	3432		142	3947	130	3432	1306	3947	1057	3432		3.59767	3.78788	0.0743277	0.19021		33.0884	30.7984	-0.103473	-2.29005		0	0	0	0
chr1	171632403	171653035	-	Slamf7	ENSMUSG00000038179.13	20632	73	173	81	181		45	173	54	181	28	173	27	181		26.0116	29.8343	0.197816	3.82269		16.185	14.9172	-0.117685	-1.26785		2	0.0969368	5.75161	0.278771
chr1	171682009	171705258	+	Cd48	ENSMUSG00000015355.13	23249	564	3201	657	3990		512	3201	593	3990	52	3201	64	3990		15.995	14.8622	-0.105978	-1.13285		1.6245	1.60401	-0.0183063	-0.0204829		0	0	0	0
chr1	171767127	171801184	+	Slamf1	ENSMUSG00000015316.11	34057	975	10045	592	5840		798	10045	483	5840	177	10045	109	5840		7.94425	8.27055	0.0580718	0.326298		1.76207	1.86644	0.0830166	0.104368		0	0	0	0
chr1	171839697	171890718	+	Cd84	ENSMUSG00000038147.13	51021	3091	19734	2161	20229		2768	19734	1798	20229	323	19734	363	20229		14.0266	8.88823	-0.658192	-5.13832		1.63677	1.79445	0.132694	0.157684		0	0	0	0
chr1	171909957	171919356	-	Gm37065	ENSMUSG00000104413.1	9399	298	2300	177	1368		69	2300	35	1368	229	2300	142	1368		3	2.55849	-0.229674	-0.441518		9.95653	10.3801	0.0601093	0.423598		0	0	0	0
chr1	171917515	171953170	+	Slamf6	ENSMUSG00000015314.10	35655	3463	13495	3047	11723		3026	13495	2672	11723	437	13495	375	11723		22.4231	22.7928	0.0235912	0.369681		3.23824	3.19884	-0.0176595	-0.0393964		2	0.0560931	5.37761	0.150823
chr1	172000960	172028444	-	Vangl2	ENSMUSG00000026556.15	27484	384	2097	321	1660		80	2097	55	1660	304	2097	266	1660		3.81498	3.31326	-0.203424	-0.50172		14.4969	16.0241	0.144499	1.5272		1	0.0363848	2.7337	0.0994651
chr1	172066013	172082795	-	Ncstn	ENSMUSG00000003458.12	16782	2144	5288	2122	4813		229	5288	244	4813	1915	5288	1878	4813		4.33056	5.06961	0.227319	0.739044		36.2141	39.0193	0.107638	2.80525		0	0	0	0
chr1	172082529	172122330	+	Copa	ENSMUSG00000026553.17	39801	12527	19199	13405	20078		12090	19199	13030	20078	437	19199	375	20078		62.972	64.8969	0.0434384	1.92487		2.27616	1.86772	-0.285327	-0.408444		0	0	0	0
chr1	172126755	172136493	+	Pex19	ENSMUSG00000003464.13	9738	790	1510	942	1618		725	1510	876	1618	65	1510	66	1618		48.0132	54.1409	0.173287	6.12767		4.30464	4.07912	-0.0776368	-0.225526		0	0	0	0
chr1	172148084	172197005	+	Dcaf8	ENSMUSG00000026554.15	48921	4047	13347	4120	12946		3726	13347	3752	12946	321	13347	368	12946		27.9164	28.9819	0.0540412	1.06554		2.40504	2.84258	0.241142	0.437542		1	0.0204411	2.5817	0.0527728
chr1	172196728	172206804	-	Pea15a	ENSMUSG00000013698.12	10076	128	911	117	857		37	911	43	857	91	911	74	857		4.06148	5.01751	0.304967	0.956033		9.98903	8.63478	-0.210185	-1.35425		0	0	0	0
chr1	172209894	172219868	-	Casq1	ENSMUSG00000007122.11	9974	10	73	7	87		5	73	3	87	5	73	4	87		6.84944	3.44839	-0.990065	-3.40106		6.84944	4.59781	-0.57504	-2.25163		0	0	0	0
chr1	172261641	172319841	+	Igsf8	ENSMUSG00000038034.15	58200	347	790	454	1045		313	790	421	1045	34	790	33	1045		39.6203	40.2871	0.0240791	0.666826		4.30381	3.1579	-0.446647	-1.14591		1	0.0171821	2.56808	0.0441251
chr1	172341210	172374085	+	Kcnj10	ENSMUSG00000044708.5	32875	1	75	0	98		1	75	0	98	0	75	0	98		1.33346	0.000102041	-13.6737	-1.33336		0.000133333	0.000102041	-0.385891	-3.12924e-05		3	0.0912548	7.95398	0.241946
chr1	172481788	172498878	+	Igsf9	ENSMUSG00000037995.15	17090	43	112	60	134		33	112	47	134	10	112	13	134		29.4643	35.0747	0.251459	5.61033		8.92865	9.70156	0.119774	0.772907		0	0	0	0
chr1	172500047	172507380	+	Tagln2	ENSMUSG00000026547.15	7333	809	1103	1073	1411		768	1103	1036	1411	41	1103	37	1411		69.6283	73.4231	0.0765606	3.79482		3.71714	2.62226	-0.503383	-1.09488		1	0.13637	2.65108	0.361527
chr1	173350879	173466040	+	Aim2	ENSMUSG00000037860.15	115161	373	3675	542	5426		279	3675	435	5426	94	3675	107	5426		7.59184	8.01696	0.0786053	0.425118		2.55783	1.97199	-0.375267	-0.585837		0	0	0	0
chr1	173468485	173491041	-	Ifi206	ENSMUSG00000037849.8	22556	348	2966	222	2430		49	2966	37	2430	299	2966	185	2430		1.65206	1.52264	-0.117693	-0.129422		10.0809	7.61317	-0.405058	-2.46775		0	0	0	0
chr1	173519717	173535957	-	Ifi214	ENSMUSG00000070501.14	16240	159	648	84	288		34	648	15	288	125	648	69	288		5.24693	5.20837	-0.0106421	-0.038562		19.2901	23.9584	0.312666	4.66822		0	0	0	0
chr1	173566283	173599274	-	Ifi213	ENSMUSG00000073491.11	32991	512	7611	354	4780		82	7611	47	4780	430	7611	307	4780		1.07739	0.983266	-0.131886	-0.0941236		5.64972	6.4226	0.184978	0.772877		0	0	0	0
chr1	173630917	173647928	+	Ifi209	ENSMUSG00000043263.13	17011	1379	5649	1453	5252		1190	5649	1263	5252	189	5649	190	5252		21.0657	24.048	0.191022	2.98231		3.34573	3.61767	0.112742	0.271945		0	0	0	0
chr1	173673675	173698395	+	Ifi208	ENSMUSG00000066677.12	24720	449	2725	388	2393		409	2725	359	2393	40	2725	29	2393		15.0092	15.0021	-0.000681124	-0.00708445		1.46789	1.21187	-0.27651	-0.256021		0	0	0	0
chr1	173701385	173706407	+	Gm18752	ENSMUSG00000103105.5	5022	12	175	18	188		9	175	14	188	3	175	4	188		5.14291	7.44686	0.534047	2.30395		1.71434	2.12771	0.311648	0.41337		0	0	0	0
chr1	173723427	173741747	-	Ifi207	ENSMUSG00000073490.11	18320	31	324	29	190		4	324	1	190	27	324	28	190		1.2346	0.526368	-1.2299	-0.70823		8.33336	14.7369	0.822461	6.40353		0	0	0	0
chr1	173747293	173766943	-	Ifi204	ENSMUSG00000073489.6	19650	43	103	73	126		5	103	4	126	38	103	69	126		4.85446	3.17468	-0.6127	-1.67978		36.8933	54.7619	0.569816	17.8687		0	0	0	0
chr1	173849126	173942491	-	Mndal	ENSMUSG00000090272.8	93365	2240	10535	3603	16659		422	10535	709	16659	1818	10535	2894	16659		4.0057	4.25596	0.087431	0.250262		17.2568	17.372	0.00960121	0.115228		0	0	0	0
chr1	173896345	173913046	-	Ifi211	ENSMUSG00000026536.9	16701	25	69	19	71		2	69	2	71	23	69	17	71		2.89869	2.81704	-0.0412226	-0.0816532		33.3334	23.9438	-0.47732	-9.38966		0	0	0	0
chr1	173920407	173942672	-	Ifi203	ENSMUSG00000039997.16	22265	655	3702	1464	7755		83	3702	204	7755	572	3702	1260	7755		2.24203	2.63056	0.230563	0.388528		15.4511	16.2476	0.0725147	0.796473		0	0	0	0
chr1	174011998	174031810	-	Ifi205	ENSMUSG00000054203.7	19812	34	116	20	79		1	116	1	79	33	116	19	79		0.862154	1.26595	0.5542	0.403793		28.4483	24.0507	-0.242264	-4.39761		0	0	0	0
chr1	174501825	174822729	+	Fmn2	ENSMUSG00000028354.13	320904	1	78	5	77		1	78	5	77	0	78	0	77		1.28218	6.49363	2.34043	5.21145		0.000128205	0.00012987	0.0186157	1.665e-06		1	0.0031162	2.6687	0.00831619
chr1	175600374	175625635	-	Fh1	ENSMUSG00000026526.14	25261	1562	3992	2301	4697		58	3992	71	4697	1504	3992	2230	4697		1.45291	1.51161	0.0571378	0.058697		37.6754	47.4771	0.333611	9.80176		0	0	0	0
chr1	175620381	175662116	+	Kmo	ENSMUSG00000039783.15	41735	288	912	215	733		250	912	195	733	38	912	20	733		27.4123	26.603	-0.0432332	-0.809277		4.16668	2.72853	-0.610775	-1.43815		1	0.0239607	2.79879	0.067061
chr1	175682237	175692901	-	Chml	ENSMUSG00000078185.3	10664	27	233	34	283		3	233	4	283	24	233	30	283		1.2876	1.41346	0.134553	0.125866		10.3005	10.6007	0.0414549	0.300271		0	0	0	0
chr1	175880581	175913489	+	Exo1	ENSMUSG00000039748.11	32908	816	2397	1084	3377		758	2397	1002	3377	58	2397	82	3377		31.6229	29.6713	-0.0918995	-1.95156		2.4197	2.42819	0.00505803	0.00849824		0	0	0	0
chr1	176733653	176814067	-	Cep170	ENSMUSG00000057335.11	80414	2033	14000	2640	18574		324	14000	452	18574	1709	14000	2188	18574		2.31429	2.43351	0.0724711	0.119223		12.2071	11.7799	-0.0513974	-0.427236		0	0	0	0
chr1	176814660	177020437	+	Sdccag8	ENSMUSG00000026504.17	205777	1240	7451	1621	9604		1137	7451	1496	9604	103	7451	125	9604		15.2597	15.5768	0.0296766	0.317146		1.38237	1.30154	-0.0869178	-0.0808241		1	0.00485963	2.75382	0.0133825
chr1	176927999	176932711	-	Gm15423	ENSMUSG00000087082.1	4712	22	258	46	314		12	258	21	314	10	258	25	314		4.6512	6.68793	0.523956	2.03673		3.87601	7.96181	1.03853	4.08581		0	0	0	0
chr1	177020073	177258203	-	Akt3	ENSMUSG00000019699.16	238130	889	7260	1156	10282		163	7260	176	10282	726	7260	980	10282		2.24518	1.71173	-0.391376	-0.53345		10	9.53122	-0.0692673	-0.468781		0	0	0	0
chr1	177442351	177450764	+	Zbtb18	ENSMUSG00000063659.11	8413	986	2641	841	2153		549	2641	461	2153	437	2641	380	2153		20.7876	21.412	0.0426966	0.624403		16.5468	17.6498	0.0931022	1.10303		0	0	0	0
chr1	177729814	177753324	+	1700016C15Rik	ENSMUSG00000015962.5	23510	13	441	11	421		8	441	8	421	5	441	3	421		1.81408	1.90026	0.0669584	0.0861796		1.13381	0.712613	-0.669988	-0.421197		0	0	0	0
chr1	177762962	177796511	-	Adss	ENSMUSG00000015961.8	33549	3986	8698	3636	10031		260	8698	348	10031	3726	8698	3288	10031		2.98919	3.46925	0.214866	0.480052		42.8374	32.7784	-0.386127	-10.059		1	0.0298071	2.82394	0.0841736
chr1	177983423	178172704	+	Catspere2	ENSMUSG00000091476.6	189281	2	78	3	64		1	78	2	64	1	78	1	64		1.28218	3.12515	1.28533	1.84297		1.28218	1.56265	0.285402	0.280476		1	0.00528315	2.5817	0.0136395
chr1	178187417	178257301	+	Desi2	ENSMUSG00000026502.13	69884	504	10754	504	10911		428	10754	399	10911	76	10754	105	10911		3.97992	3.65686	-0.122132	-0.323054		0.706715	0.962332	0.445408	0.255618		0	0	0	0
chr1	178313328	178318549	-	B230369F24Rik	ENSMUSG00000086350.1	5221	42	335	18	297		16	335	7	297	26	335	11	297		4.77615	2.35694	-1.01894	-2.41921		7.76122	3.70374	-1.0673	-4.05749		0	0	0	0
chr1	178319130	178322693	+	Cox20	ENSMUSG00000026500.6	3563	1167	4382	1206	4212		583	4382	587	4212	584	4382	619	4212		13.3044	13.9364	0.0669487	0.631945		13.3272	14.6961	0.141055	1.36886		0	0	0	0
chr1	178321108	178337797	-	Hnrnpu	ENSMUSG00000039630.10	16689	31711	40261	37286	45660		2544	40261	2600	45660	29167	40261	34686	45660		6.31877	5.69426	-0.150135	-0.624508		72.4448	75.9658	0.0684686	3.52104		0	0	0	0
chr1	178406085	178484513	+	Efcab2	ENSMUSG00000026495.8	78428	112	992	134	1158		84	992	110	1158	28	992	24	1158		8.46775	9.49914	0.165819	1.03139		2.82259	2.07255	-0.445615	-0.750043		0	0	0	0
chr1	178951960	179518041	-	Smyd3	ENSMUSG00000055067.15	566081	831	73482	939	76233		148	73482	150	76233	683	73482	789	76233		0.20141	0.196765	-0.0336594	-0.00464469		0.929479	1.03498	0.155115	0.105506		3	0.00529959	8.11419	0.014334
chr1	179528055	179546267	-	Tfb2m	ENSMUSG00000026492.11	18212	428	1945	472	2203		101	1945	109	2203	327	1945	363	2203		5.19281	4.9478	-0.0697266	-0.245004		16.8123	16.4775	-0.0290205	-0.334809		0	0	0	0
chr1	179546370	179627478	+	Cnst	ENSMUSG00000038949.8	81108	906	7213	908	8476		833	7213	801	8476	73	7213	107	8476		11.5486	9.45021	-0.289298	-2.09838		1.01206	1.26239	0.318858	0.250326		0	0	0	0
chr1	179744894	179803680	-	Ahctf1	ENSMUSG00000026491.13	58786	5536	13938	6195	14895		672	13938	674	14895	4864	13938	5521	14895		4.82135	4.52501	-0.0915172	-0.296343		34.8974	37.0661	0.0869818	2.16873		0	0	0	0
chr1	179960472	180165603	+	Cdc42bpa	ENSMUSG00000026490.18	205131	265	1520	825	4549		241	1520	765	4549	24	1520	60	4549		15.8553	16.8169	0.0849481	0.961616		1.57895	1.31897	-0.259554	-0.25998		2	0.00974987	5.46741	0.0266533
chr1	180165238	180199602	-	Coq8a	ENSMUSG00000026489.13	34364	229	757	303	968		36	757	37	968	193	757	266	968		4.75563	3.82232	-0.315185	-0.933303		25.4954	27.4793	0.108111	1.98396		1	0.0291002	2.52433	0.0734586
chr1	180227004	180263438	-	Psen2	ENSMUSG00000010609.15	36434	223	979	323	1402		38	979	40	1402	185	979	283	1402		3.88152	2.85307	-0.444105	-1.02845		18.8968	20.1855	0.095171	1.28861		0	0	0	0
chr1	180326970	180330550	-	Gm5069	ENSMUSG00000055676.4	3580	1	67	0	54		0	67	0	54	1	67	0	54		0.000149254	0.000185185	0.311201	3.59313e-05		1.49268	0.000185185	-12.9767	-1.4925		0	0	0	0
chr1	180330485	180424802	+	Itpkb	ENSMUSG00000038855.10	94317	1798	5551	1561	4505		1640	5551	1425	4505	158	5551	136	4505		29.5442	31.6315	0.0984867	2.08729		2.84634	3.01887	0.0849028	0.172534		3	0.0318076	8.08933	0.0857675
chr1	180568924	180601254	+	Parp1	ENSMUSG00000026496.11	32330	5707	9228	10056	15254		5537	9228	9791	15254	170	9228	265	15254		60.0022	64.1864	0.097254	4.18428		1.84222	1.73725	-0.0846404	-0.104971		0	0	0	0
chr1	180641150	180690694	+	Lin9	ENSMUSG00000058729.13	49544	1146	6633	1716	7478		1009	6633	1576	7478	137	6633	140	7478		15.2118	21.0752	0.47035	5.86333		2.06543	1.87216	-0.14174	-0.193272		1	0.0201841	3.01107	0.0607757
chr1	180726043	180754204	+	Acbd3	ENSMUSG00000026499.5	28161	911	3720	857	4195		803	3720	738	4195	108	3720	119	4195		21.586	17.5924	-0.295147	-3.99365		2.90323	2.83671	-0.033438	-0.0665157		0	0	0	0
chr1	180763497	180768656	-	Gm38293	ENSMUSG00000103156.1	5159	20	311	21	435		8	311	7	435	12	311	14	435		2.57238	1.60922	-0.676743	-0.963161		3.85855	3.21841	-0.26171	-0.640139		0	0	0	0
chr1	180800832	180813943	-	H3f3a	ENSMUSG00000060743.12	13111	11109	12269	11435	12480		92	12269	88	12480	11017	12269	11347	12480		0.749858	0.705129	-0.0887305	-0.0447292		89.7954	90.9215	0.0179792	1.12605		0	0	0	0
chr1	180851127	180868113	+	Sde2	ENSMUSG00000038806.7	16986	569	1599	597	1541		534	1599	557	1541	35	1599	40	1541		33.3959	36.1454	0.114141	2.74949		2.18887	2.59572	0.245948	0.406849		1	0.058872	2.6101	0.153662
chr1	180904293	180908088	+	Pycr2	ENSMUSG00000026520.8	3795	475	638	438	570		434	638	404	570	41	638	34	570		68.0251	70.8772	0.0592548	2.85211		6.42635	5.96493	-0.107494	-0.461418		1	0.263505	2.69644	0.710524
chr1	180942344	180975112	+	Tmem63a	ENSMUSG00000026519.16	32768	808	2145	1100	2875		714	2145	950	2875	94	2145	150	2875		33.2867	33.0435	-0.0105809	-0.243236		4.38229	5.21739	0.251645	0.835106		1	0.0305176	2.51713	0.0768167
chr1	180976210	181020904	-	Ephx1	ENSMUSG00000038776.13	44694	802	2597	927	2482		36	2597	42	2482	766	2597	885	2482		1.38622	1.69219	0.287735	0.305969		29.4956	35.6567	0.273676	6.16116		0	0	0	0
chr1	181087138	181144204	-	Nvl	ENSMUSG00000026516.8	57066	3118	8640	3421	8986		248	8640	247	8986	2870	8640	3174	8986		2.87037	2.74872	-0.0624768	-0.12165		33.2176	35.3216	0.0886036	2.10402		1	0.0175236	2.52433	0.0442353
chr1	181144693	181168994	+	Cnih4	ENSMUSG00000062169.13	24301	554	3012	579	3092		479	3012	495	3092	75	3012	84	3092		15.9031	16.0091	0.00958431	0.106001		2.49004	2.71669	0.12568	0.226648		1	0.0411506	2.82133	0.116099
chr1	181173228	181211552	-	Wdr26	ENSMUSG00000038733.13	38324	4974	17281	5756	17611		429	17281	493	17611	4545	17281	5263	17611		2.4825	2.79939	0.17332	0.316892		26.3006	29.8847	0.184315	3.58417		1	0.0260933	2.5817	0.0673651
chr1	181576559	181815774	+	Dnah14	ENSMUSG00000047369.15	239215	108	787	119	803		59	787	47	803	49	787	72	803		7.49684	5.85306	-0.35709	-1.64377		6.22619	8.96639	0.526178	2.7402		1	0.00418034	2.60353	0.0108836
chr1	181815335	181843046	-	Lbr	ENSMUSG00000004880.11	27711	20222	35149	20947	36538		892	35149	995	36538	19330	35149	19952	36538		2.53777	2.72319	0.101739	0.185424		54.9945	54.6062	-0.0102223	-0.388289		1	0.0360868	2.81119	0.101447
chr1	181896384	182019990	-	Enah	ENSMUSG00000022995.16	123606	36	120	11	51		5	120	0	51	31	120	11	51		4.16675	0.000196078	-14.3752	-4.16655		25.8334	21.5688	-0.260293	-4.26461		3	0.0242707	8.31882	0.0673011
chr1	182124737	182132407	+	Srp9	ENSMUSG00000026511.7	7670	42	370	31	363		15	370	9	363	27	370	22	363		4.05408	2.47937	-0.709403	-1.57471		7.29732	6.06063	-0.267899	-1.23669		0	0	0	0
chr1	182275772	182282804	-	Degs1	ENSMUSG00000038633.5	7032	235	1208	252	1253		63	1208	53	1253	172	1208	199	1253		5.21524	4.22986	-0.302125	-0.985384		14.2384	15.8819	0.157594	1.64347		0	0	0	0
chr1	182287990	182303325	+	1700047M11Rik	ENSMUSG00000100147.2	15335	7	130	3	134		1	130	1	134	6	130	2	134		0.769307	0.746343	-0.0437213	-0.0229644		4.61546	1.49261	-1.62864	-3.12285		0	0	0	0
chr1	182313102	182341629	-	Fbxo28	ENSMUSG00000047539.9	28527	930	9162	881	9942		81	9162	112	9942	849	9162	769	9942		0.884088	1.12653	0.349631	0.242447		9.26654	7.73486	-0.260654	-1.53167		0	0	0	0
chr1	182409172	182462432	+	Trp53bp2	ENSMUSG00000026510.10	53260	1089	9315	1084	8911		917	9315	931	8911	172	9315	153	8911		9.84434	10.4478	0.0858279	0.603424		1.84649	1.71698	-0.104908	-0.129505		0	0	0	0
chr1	182467260	182517608	-	Capn2	ENSMUSG00000026509.15	50348	805	2114	858	2056		63	2114	63	2056	742	2114	795	2056		2.98014	3.06421	0.0401351	0.08407		35.0993	38.6673	0.139671	3.56798		0	0	0	0
chr1	182763860	182896591	+	Susd4	ENSMUSG00000038576.15	132731	3	200	2	44		2	200	2	44	1	200	0	44		1.00005	4.54567	2.18442	3.54562		0.50005	0.000227272	-11.1034	-0.499822		2	0.0150681	5.45026	0.0410624
chr1	183086266	183221522	-	Disp1	ENSMUSG00000030768.12	135256	383	12867	363	18689		64	12867	99	18689	319	12867	264	18689		0.497397	0.529724	0.0908422	0.0323267		2.47921	1.4126	-0.811532	-1.06661		1	0.00739339	2.5817	0.0190875
chr1	183276352	183297269	-	Brox	ENSMUSG00000046836.13	20917	3424	11041	3617	11129		539	11041	489	11129	2885	11041	3128	11129		4.88181	4.39393	-0.151904	-0.487878		26.1299	28.1067	0.105216	1.97687		0	0	0	0
chr1	183296590	183325476	+	Aida	ENSMUSG00000042901.10	28886	598	3388	770	4077		493	3388	642	4077	105	3388	128	4077		14.5514	15.7469	0.113912	1.19551		3.09918	3.13957	0.0186802	0.0403894		2	0.0692377	10.7312	0.371502
chr1	183326725	183369553	-	Mia3	ENSMUSG00000056050.12	42828	6088	20989	5540	17404		475	20989	471	17404	5613	20989	5069	17404		2.26309	2.70627	0.258014	0.443184		26.7426	29.1255	0.123144	2.38291		1	0.0233492	3.01338	0.07036
chr1	183388981	183410198	+	Taf1a	ENSMUSG00000072258.10	21217	757	3146	765	3113		567	3146	584	3113	190	3146	181	3113		18.0229	18.76	0.0578327	0.737152		6.03942	5.81433	-0.0547966	-0.225088		0	0	0	0
chr1	183418215	183436808	+	Hhipl2	ENSMUSG00000053461.9	18593	69	225	25	134		49	225	24	134	20	225	1	134		21.7778	17.9105	-0.282053	-3.8673		8.88893	0.746343	-3.5741	-8.14259		0	0	0	0
chr1	183420655	183422213	+	Gm37214	ENSMUSG00000104022.1	1558	14	54	4	19		4	54	0	19	10	54	4	19		7.40758	0.000526313	-13.7808	-7.40705		18.5187	21.053	0.185049	2.53438		0	0	0	0
chr1	184013302	184075636	+	Dusp10	ENSMUSG00000039384.8	62334	336	19214	841	20273		301	19214	768	20273	35	19214	73	20273		1.56657	3.78829	1.27394	2.22172		0.182159	0.360085	0.983138	0.177926		1	0.0160426	2.51377	0.0403274
chr1	184786767	184811313	-	Marc1	ENSMUSG00000026621.13	24546	7	108	6	73		2	108	1	73	5	108	5	73		1.85194	1.37	-0.434866	-0.481945		4.62972	6.84944	0.565062	2.21972		2	0.0814797	5.28542	0.215327
chr1	184813068	184846451	-	Marc2	ENSMUSG00000073481.9	33383	1802	4715	1871	4686		77	4715	68	4686	1725	4715	1803	4686		1.63309	1.45113	-0.170423	-0.181955		36.5854	38.4763	0.0727038	1.89095		0	0	0	0
chr1	184896789	184999570	-	Mark1	ENSMUSG00000026620.11	102781	5	92	3	23		1	92	0	23	4	92	3	23		1.08706	0.000434781	-11.2879	-1.08663		4.34793	13.0439	1.58497	8.69593		0	0	0	0
chr1	185204117	185286759	+	Rab3gap2	ENSMUSG00000039318.12	82642	2531	8451	3230	10571		2332	8451	2969	10571	199	8451	261	10571		27.5944	28.0863	0.0254914	0.491906		2.35475	2.46902	0.0683633	0.114268		0	0	0	0
chr1	185284726	185329396	-	Iars2	ENSMUSG00000026618.11	44670	1914	5436	2158	5342		133	5436	156	5342	1781	5436	2002	5342		2.44665	2.92026	0.255285	0.473603		32.7631	37.4766	0.19392	4.71354		0	0	0	0
chr1	185332149	185357777	+	Bpnt1	ENSMUSG00000026617.16	25628	322	855	331	705		302	855	320	705	20	855	11	705		35.3216	45.3901	0.361824	10.0684		2.33919	1.5603	-0.584189	-0.778895		0	0	0	0
chr1	185363044	185428360	+	Eprs	ENSMUSG00000026615.14	65316	7093	12453	8117	13618		6879	12453	7911	13618	214	12453	206	13618		55.2397	58.0922	0.0726397	2.85253		1.71846	1.5127	-0.183988	-0.205758		0	0	0	0
chr1	186622792	186705989	-	Tgfb2	ENSMUSG00000039239.14	83197	6	136	3	90		4	136	2	90	2	136	1	90		2.94125	2.22233	-0.404355	-0.718917		1.47066	1.11122	-0.404319	-0.35944		0	0	0	0
chr1	186720978	186749358	-	Rrp15	ENSMUSG00000001305.5	28380	121	1472	131	1678		17	1472	15	1678	104	1472	116	1678		1.1549	0.893927	-0.369536	-0.260971		7.06522	6.913	-0.0314239	-0.152227		0	0	0	0
chr1	186749396	186752921	+	A430105J06Rik	ENSMUSG00000097784.1	3525	4	51	5	42		1	51	4	42	3	51	1	42		1.96098	9.52402	2.28	7.56305		5.88254	2.38118	-1.30476	-3.50135		0	0	0	0
chr1	187044648	187215465	-	Spata17	ENSMUSG00000026611.17	170817	2	87	1	83		0	87	0	83	2	87	1	83		0.000114942	0.000120482	0.067904	5.53939e-06		2.29896	1.20494	-0.932024	-1.09402		1	0.00585422	2.60353	0.0152416
chr1	187215508	187351704	+	Gpatch2	ENSMUSG00000039210.16	136196	627	6821	621	6500		446	6821	474	6500	181	6821	147	6500		6.53863	7.29231	0.157387	0.753677		2.65357	2.26154	-0.23063	-0.392031		1	0.00734236	2.81119	0.0206408
chr1	187608791	188214885	+	Esrrg	ENSMUSG00000026610.13	606094	0	382	0	48		0	382	0	48	0	382	0	48		2.6178e-05	0.000208333	2.99246	0.000182155		2.6178e-05	0.000208333	2.99246	0.000182155		1	0.00164991	2.5817	0.00425957
chr1	188262023	188965041	+	Ush2a	ENSMUSG00000026609.15	703018	2	50	0	33		1	50	0	33	1	50	0	33		2.0002	0.000303029	-12.6884	-1.99989		2.0002	0.000303029	-12.6884	-1.99989		1	0.00142244	2.86388	0.00407369
chr1	188971095	189007841	-	Kctd3	ENSMUSG00000026608.13	36746	563	4647	653	4567		108	4647	105	4567	455	4647	548	4567		2.32408	2.2991	-0.0155891	-0.0249778		9.79127	11.9991	0.293362	2.20786		1	0.0272138	2.89607	0.0788132
chr1	189207930	189402273	-	Kcnk2	ENSMUSG00000037624.15	194343	1	138	1	34		0	138	1	34	1	138	0	34		7.24637e-05	2.94146	15.3089	2.94139		0.72471	0.000294117	-11.2668	-0.724416		1	0.00514554	2.59468	0.013351
chr1	189640606	189688086	-	Cenpf	ENSMUSG00000026605.14	47480	2537	7136	3091	9805		213	7136	258	9805	2324	7136	2833	9805		2.98487	2.63131	-0.181884	-0.353555		32.5673	28.8934	-0.172681	-3.67384		0	0	0	0
chr1	189728268	189876695	+	Ptpn14	ENSMUSG00000026604.17	148427	530	7528	223	2714		443	7528	185	2714	87	7528	38	2714		5.8847	6.81651	0.212065	0.931812		1.15569	1.40015	0.276832	0.244464		7	0.0471612	18.062	0.121689
chr1	189880492	189922363	-	Smyd2	ENSMUSG00000026603.13	41871	430	1506	641	1740		42	1506	37	1740	388	1506	604	1740		2.78885	2.12644	-0.391229	-0.662409		25.7636	34.7126	0.430126	8.94903		0	0	0	0
chr1	190700202	190911770	-	Rps6kc1	ENSMUSG00000089872.10	211568	378	6101	324	7079		40	6101	36	7079	338	6101	288	7079		0.655632	0.508548	-0.366503	-0.147084		5.54008	4.06837	-0.445454	-1.4717		1	0.00472661	2.5817	0.0122027
chr1	190925112	190946962	+	Angel2	ENSMUSG00000026634.16	21850	1479	4755	1562	4716		1254	4755	1330	4716	225	4755	232	4716		26.3722	28.2019	0.0967705	1.82963		4.73186	4.91943	0.0560814	0.187562		0	0	0	0
chr1	190947646	190979296	-	Vash2	ENSMUSG00000037568.12	31650	3	68	8	46		3	68	4	46	0	68	4	46		4.41191	8.69585	0.978925	4.28395		0.000147059	8.69585	15.8516	8.6957		0	0	0	0
chr1	191005847	191026158	-	Flvcr1	ENSMUSG00000066595.9	20311	893	3148	533	1915		104	3148	56	1915	789	3148	477	1915		3.30369	2.92429	-0.175992	-0.379401		25.0635	24.9086	-0.0089448	-0.154915		0	0	0	0
chr1	191036639	191042942	+	Spata45	ENSMUSG00000057072.11	6303	2	50	0	50		2	50	0	50	0	50	0	50		4.00019	0.0002	-14.2878	-3.99999		0.0002	0.0002	0	0		0	0	0	0
chr1	191045826	191062932	-	Tatdn3	ENSMUSG00000026632.17	17106	265	1287	255	1383		56	1287	66	1383	209	1287	189	1383		4.35121	4.77224	0.13325	0.421029		16.2393	13.6659	-0.248906	-2.57337		0	0	0	0
chr1	191063012	191086474	+	Nsl1	ENSMUSG00000062510.12	23462	388	1871	639	2802		347	1871	579	2802	41	1871	60	2802		18.5462	20.6638	0.15598	2.11758		2.19135	2.14133	-0.0333099	-0.0500156		0	0	0	0
chr1	191097847	191108945	+	Batf3	ENSMUSG00000026630.9	11098	6	97	8	57		6	97	7	57	0	97	1	57		6.18566	12.2809	0.989411	6.09519		0.000103093	1.75456	14.0549	1.75446		1	0.0901063	2.52907	0.227885
chr1	191306789	191318194	-	Nenf	ENSMUSG00000037499.9	11405	114	227	110	210		3	227	7	210	111	227	103	210		1.32163	3.33338	1.33467	2.01175		48.8987	49.0476	0.00438768	0.148942		0	0	0	0
chr1	191325912	191350914	+	Tmem206	ENSMUSG00000026627.7	25002	290	2254	362	2100		232	2254	306	2100	58	2254	56	2100		10.2928	14.5714	0.501505	4.27862		2.57321	2.66667	0.0514722	0.0934638		0	0	0	0
chr1	191351975	191403272	-	Ppp2r5a	ENSMUSG00000026626.11	51297	10645	31552	11868	39574		594	31552	766	39574	10051	31552	11102	39574		1.88261	1.93561	0.04006	0.0530077		31.8554	28.0538	-0.183341	-3.80158		1	0.0194943	2.83686	0.0553026
chr1	191436340	191465048	-	Gm32200	ENSMUSG00000103114.1	28708	72	486	233	1521		28	486	85	1521	44	486	148	1521		5.76134	5.58843	-0.0439592	-0.172901		9.05352	9.73045	0.104028	0.67693		0	0	0	0
chr1	191537356	191575544	-	Dtl	ENSMUSG00000037474.13	38188	1238	4377	2010	6470		206	4377	269	6470	1032	4377	1741	6470		4.70642	4.15765	-0.178862	-0.54877		23.5778	26.9088	0.19065	3.33102		0	0	0	0
chr1	191575636	191623688	+	Ints7	ENSMUSG00000037461.10	48052	3541	11524	4408	13403		3192	11524	4060	13403	349	11524	348	13403		27.6987	30.2917	0.129105	2.59301		3.02846	2.59643	-0.222054	-0.432029		0	0	0	0
chr1	191717834	191784255	+	Lpgat1	ENSMUSG00000026623.16	66421	340	3439	358	4104		313	3439	325	4104	27	3439	33	4104		9.10149	7.91911	-0.200765	-1.18238		0.785115	0.804096	0.034464	0.0189811		0	0	0	0
chr1	191821444	191833050	+	Nek2	ENSMUSG00000026622.15	11606	970	1942	1170	2755		863	1942	1063	2755	107	1942	107	2755		44.4387	38.5844	-0.2038	-5.85433		5.50979	3.88385	-0.504509	-1.62594		0	0	0	0
chr1	191906767	191913247	+	Slc30a1	ENSMUSG00000037434.7	6480	70	141	65	107		36	141	35	107	34	141	30	107		25.532	32.7103	0.357442	7.17838		24.1135	28.0375	0.217512	3.92392		0	0	0	0
chr1	191997205	192092559	-	Traf5	ENSMUSG00000026637.13	95354	128	825	124	686		25	825	24	686	103	825	100	686		3.03031	3.49856	0.207292	0.468242		12.4849	14.5773	0.223541	2.09241		0	0	0	0
chr1	192098546	192138062	-	Rcor3	ENSMUSG00000037395.15	39516	227	2209	280	2620		76	2209	101	2620	151	2209	179	2620		3.44048	3.85497	0.16411	0.41449		6.83568	6.83206	-0.000762494	-0.00361184		2	0.0506124	5.9542	0.150678
chr1	192190774	192510159	+	Kcnh1	ENSMUSG00000058248.12	319385	6	165	1	56		3	165	1	56	3	165	0	56		1.81824	1.78589	-0.0259007	-0.0323517		1.81824	0.000178571	-13.3138	-1.81806		1	0.00313102	2.50535	0.00784429
chr1	192496711	192771223	-	Hhat	ENSMUSG00000037375.16	274512	112	2363	105	2278		21	2363	20	2278	91	2363	85	2278		0.888705	0.877967	-0.0175371	-0.0107375		3.85104	3.73135	-0.0455517	-0.119693		5	0.0182141	13.1391	0.0478634
chr1	192891233	193035775	-	Syt14	ENSMUSG00000016200.14	144542	53	1749	31	806		8	1749	6	806	45	1749	25	806		0.45741	0.744429	0.702647	0.287019		2.5729	3.10175	0.269684	0.528845		0	0	0	0
chr1	193091104	193130272	-	Diexf	ENSMUSG00000016181.9	39168	1897	7675	1595	6651		215	7675	223	6651	1682	7675	1372	6651		2.8013	3.35288	0.259303	0.551577		21.9153	20.6285	-0.0873017	-1.28683		4	0.102124	10.6513	0.27194
chr1	193153111	193172023	+	Irf6	ENSMUSG00000026638.15	18912	99	364	63	287		88	364	60	287	11	364	3	287		24.1758	20.906	-0.209653	-3.26989		3.022	1.04533	-1.53155	-1.97667		0	0	0	0
chr1	193168046	193177832	+	A130010J15Rik	ENSMUSG00000079144.7	9786	71	78	51	67		48	78	43	67	23	78	8	67		61.5385	64.1792	0.0606153	2.64065		29.4873	11.9404	-1.30424	-17.5468		0	0	0	0
chr1	193175453	193201703	-	Traf3ip3	ENSMUSG00000037318.10	26250	5769	18268	6454	15735		1704	18268	1572	15735	4065	18268	4882	15735		9.32779	9.99047	0.0990174	0.662681		22.252	31.0264	0.479558	8.77435		0	0	0	0
chr1	193187274	193192379	+	Gm15872	ENSMUSG00000090080.2	5105	146	2701	122	2367		105	2701	81	2367	41	2701	41	2367		3.88745	3.42206	-0.183961	-0.465395		1.51796	1.73215	0.190434	0.214195		0	0	0	0
chr1	193207699	193343878	+	Lamb3	ENSMUSG00000026639.18	136179	286	1401	135	684		248	1401	117	684	38	1401	18	684		17.7016	17.1053	-0.0494423	-0.596372		2.71236	2.63159	-0.0436097	-0.0807621		1	0.00734328	2.57456	0.0189057
chr1	193221634	193264075	-	Hsd11b1	ENSMUSG00000016194.14	42441	836	3117	322	1279		80	3117	42	1279	756	3117	280	1279		2.56657	3.28382	0.355533	0.717249		24.2541	21.8921	-0.147817	-2.36198		0	0	0	0
chr1	193346346	193370298	-	Camk1g	ENSMUSG00000016179.11	23952	88	259	119	297		14	259	12	297	74	259	107	297		5.40544	4.04044	-0.419901	-1.36501		28.5715	36.027	0.334502	7.4555		1	0.0417502	2.71885	0.113512
chr1	194618218	194816869	+	Plxna2	ENSMUSG00000026640.12	198651	23	186	8	73		18	186	7	73	5	186	1	73		9.67747	9.58916	-0.0132244	-0.088303		2.68822	1.37	-0.97248	-1.31823		0	0	0	0
chr1	194976375	195037904	+	A330023F24Rik	ENSMUSG00000096929.7	61529	23	449	36	487		16	449	24	487	7	449	12	487		3.5635	4.92815	0.467753	1.36466		1.55904	2.46409	0.660393	0.905044		0	0	0	0
chr1	195036826	195092249	-	Cd46	ENSMUSG00000016493.13	55423	294	2709	279	2655		87	2709	77	2655	207	2709	202	2655		3.21152	2.90019	-0.147108	-0.311329		7.6412	7.60829	-0.00622693	-0.0329097		0	0	0	0
chr1	195097382	195131586	-	Cr1l	ENSMUSG00000016481.15	34204	1462	10841	1503	9977		260	10841	263	9977	1202	10841	1240	9977		2.3983	2.63606	0.136371	0.23776		11.0875	12.4286	0.164723	1.34105		0	0	0	0
chr1	195136811	195176716	-	Cr2	ENSMUSG00000026616.15	39905	160	1433	198	1529		98	1433	111	1529	62	1433	87	1529		6.83881	7.25965	0.0861561	0.420847		4.32659	5.69	0.395197	1.36341		0	0	0	0
chr2	3114224	3227806	+	Fam171a1	ENSMUSG00000050530.14	113582	4	150	2	85		2	150	2	85	2	150	0	85		1.3334	2.35306	0.819427	1.01966		1.3334	0.000117647	-13.4684	-1.33328		1	0.00880421	2.60353	0.022922
chr2	3284212	3328877	+	Nmt2	ENSMUSG00000026643.16	44665	816	3303	1131	3894		716	3303	1007	3894	100	3303	124	3894		21.6773	25.8603	0.254556	4.18303		3.02755	3.18439	0.0728639	0.156835		1	0.0223889	2.7337	0.0612045
chr2	3328949	3332643	-	Rpp38	ENSMUSG00000049950.6	3694	27	184	34	178		2	184	4	178	25	184	30	178		1.08701	2.24725	1.04779	1.16024		13.587	16.854	0.310862	3.26698		0	0	0	0
chr2	3424131	3464130	+	Dclre1c	ENSMUSG00000026648.18	39999	1873	9980	1252	6029		1564	9980	1081	6029	309	9980	171	6029		15.6713	17.93	0.194247	2.25866		3.09619	2.83629	-0.126489	-0.2599		3	0.0750019	7.89744	0.197441
chr2	3455815	3475031	-	Suv39h2	ENSMUSG00000026646.16	19216	271	1982	238	1439		105	1982	58	1439	166	1982	180	1439		5.29768	4.03058	-0.394373	-1.2671		8.37538	12.5087	0.578704	4.13331		0	0	0	0
chr2	3488850	3512814	-	Hspa14	ENSMUSG00000109865.1	23964	2347	4791	2461	4745		156	4791	167	4745	2191	4791	2294	4745		3.25611	3.5195	0.112221	0.263389		45.7316	48.3456	0.0801946	2.61405		0	0	0	0
chr2	3504527	3512790	-	Gm45902	ENSMUSG00000051396.15	8263	71	270	65	277		27	270	18	277	44	270	47	277		10	6.49823	-0.621886	-3.5018		16.2963	16.9675	0.0582305	0.671212		0	0	0	0
chr2	3513030	3526376	+	Cdnf	ENSMUSG00000039496.8	13346	17	97	5	64		11	97	4	64	6	97	1	64		11.3403	6.25015	-0.859497	-5.09015		6.18566	1.56265	-1.98493	-4.62301		0	0	0	0
chr2	3570488	3782142	+	Fam107b	ENSMUSG00000026655.15	211654	2063	26290	2611	32022		1869	26290	2335	32022	194	26290	276	32022		7.10917	7.29186	0.0366067	0.182695		0.737924	0.861908	0.224062	0.123984		5	0.0236235	13.2276	0.0624963
chr2	3752986	3755177	-	Gm13185	ENSMUSG00000085205.1	2191	127	834	162	1072		84	834	108	1072	43	834	54	1072		10.072	10.0746	0.000384119	0.00268203		5.15589	5.03732	-0.0335635	-0.118564		0	0	0	0
chr2	3925808	3929139	-	Gm13191	ENSMUSG00000086445.1	3331	0	117	2	42		0	117	1	42	0	117	1	42		8.547e-05	2.38118	14.7659	2.3811		8.547e-05	2.38118	14.7659	2.3811		0	0	0	0
chr2	4017717	4614043	+	Frmd4a	ENSMUSG00000026657.16	596326	227	2062	257	2114		189	2062	213	2114	38	2062	44	2114		9.16586	10.0757	0.136536	0.909827		1.84288	2.08137	0.175573	0.238491		13	0.0218002	35.2751	0.0591541
chr2	4622058	4652113	-	Prpf18	ENSMUSG00000039449.14	30055	1317	5673	1430	6062		86	5673	101	6062	1231	5673	1329	6062		1.51595	1.66612	0.136264	0.150164		21.6993	21.9235	0.0148283	0.22418		0	0	0	0
chr2	4881564	4910557	+	Sephs1	ENSMUSG00000026662.13	28993	1194	4188	1725	5601		1110	4188	1621	5601	84	4188	104	5601		26.5043	28.9413	0.126901	2.43696		2.00573	1.85681	-0.111301	-0.14892		0	0	0	0
chr2	4919019	4938730	+	Phyh	ENSMUSG00000026664.7	19711	274	531	349	710		270	531	336	710	4	531	13	710		50.8475	47.324	-0.103605	-3.52352		0.753314	1.831	1.28131	1.07769		0	0	0	0
chr2	4989714	5012791	-	Mcm10	ENSMUSG00000026669.14	23077	1574	2439	2329	3560		74	2439	129	3560	1500	2439	2200	3560		3.03403	3.6236	0.256186	0.589564		61.5006	61.7978	0.00695353	0.297137		0	0	0	0
chr2	5020642	5064051	-	Optn	ENSMUSG00000026672.11	43409	56	150	27	96		7	150	4	96	49	150	23	96		4.66673	4.16677	-0.163484	-0.499964		32.6667	23.9584	-0.447289	-8.7083		0	0	0	0
chr2	5293457	5714515	-	Camk1d	ENSMUSG00000039145.16	421058	984	88940	630	76467		189	88940	141	76467	795	88940	489	76467		0.212503	0.184393	-0.204696	-0.0281095		0.893861	0.639492	-0.483125	-0.254369		4	0.00949988	10.8034	0.0256577
chr2	5794294	5845164	-	Cdc123	ENSMUSG00000039128.13	50870	2102	11441	2537	11629		229	11441	255	11629	1873	11441	2282	11629		2.00157	2.19279	0.131636	0.191221		16.3709	19.6234	0.261434	3.25241		0	0	0	0
chr2	5845019	5871895	+	Nudt5	ENSMUSG00000025817.12	26876	1390	3489	1642	4188		1318	3489	1516	4188	72	3489	126	4188		37.7759	36.1987	-0.0615285	-1.5772		2.06363	3.0086	0.543906	0.944967		0	0	0	0
chr2	5870987	5895432	-	Sec61a2	ENSMUSG00000025816.15	24445	513	3063	704	4421		146	3063	232	4421	367	3063	472	4421		4.76657	5.24768	0.138729	0.481112		11.9817	10.6763	-0.166421	-1.3054		0	0	0	0
chr2	5896115	5942792	-	Dhtkd1	ENSMUSG00000025815.13	46677	12	57	8	65		2	57	2	65	10	57	6	65		3.50894	3.07707	-0.189477	-0.431869		17.544	9.23091	-0.926433	-8.3131		2	0.0428477	5.17751	0.110922
chr2	5951469	6056703	+	Upf2	ENSMUSG00000043241.14	105234	2648	16372	2762	18358		2428	16372	2519	18358	220	16372	243	18358		14.8302	13.7215	-0.112096	-1.10866		1.34376	1.32367	-0.0217256	-0.0200841		0	0	0	0
chr2	6322667	6446390	+	Usp6nl	ENSMUSG00000039046.15	123723	623	12060	863	14349		501	12060	733	14349	122	12060	130	14349		4.15423	5.10837	0.298282	0.954141		1.01161	0.905987	-0.15909	-0.105622		2	0.0161651	5.66267	0.0457689
chr2	6431786	6436033	-	Gm13388	ENSMUSG00000085716.1	4247	31	262	47	365		18	262	30	365	13	262	17	365		6.87026	8.2192	0.258633	1.34894		4.96187	4.65756	-0.091309	-0.304308		0	0	0	0
chr2	6472000	6478619	+	Gm13391	ENSMUSG00000086109.2	6619	6	82	2	62		2	82	1	62	4	82	1	62		2.43914	1.61306	-0.596573	-0.826081		4.87816	1.61306	-1.59654	-3.2651		0	0	0	0
chr2	6539694	7509563	-	Celf2	ENSMUSG00000002107.18	969869	2797	114513	2882	122157		441	114513	544	122157	2356	114513	2338	122157		0.385109	0.445329	0.209603	0.0602194		2.05741	1.91393	-0.10429	-0.143478		8	0.00824854	20.9234	0.0215735
chr2	9352431	9447676	+	Gm13219	ENSMUSG00000079604.9	95245	0	139	7	877		0	139	5	877	0	139	2	877		7.19424e-05	0.570137	12.9522	0.570065		7.19424e-05	0.228062	11.6303	0.22799		0	0	0	0
chr2	9591219	9597843	-	Gm13218	ENSMUSG00000079603.3	6624	1	103	1	254		0	103	1	254	1	103	0	254		9.70873e-05	0.39374	11.9857	0.393643		0.97097	3.93701e-05	-14.59	-0.970931		1	0.150966	2.5494	0.384873
chr2	9857078	9890034	-	Gata3	ENSMUSG00000015619.10	32956	539	5766	1427	13495		178	5766	492	13495	361	5766	935	13495		3.08706	3.6458	0.239998	0.558732		6.26084	6.92849	0.146185	0.667652		3	0.0910305	8.70545	0.264154
chr2	9914552	10048596	-	Taf3	ENSMUSG00000025782.12	134044	165	13365	192	14537		41	13365	26	14537	124	13365	166	14537		0.306772	0.178855	-0.77838	-0.127918		0.927797	1.14191	0.299573	0.214117		0	0	0	0
chr2	10056016	10080510	-	Atp5c1	ENSMUSG00000025781.14	24494	7933	14489	8983	14565		313	14489	302	14565	7620	14489	8681	14565		2.16026	2.07346	-0.0591618	-0.0867957		52.5916	59.6018	0.180523	7.01016		0	0	0	0
chr2	10080593	10092806	+	Kin	ENSMUSG00000037262.7	12213	588	3115	527	2904		448	3115	409	2904	140	3115	118	2904		14.382	14.084	-0.0302072	-0.298		4.49439	4.06336	-0.145449	-0.431021		0	0	0	0
chr2	10094593	10131396	-	Itih2	ENSMUSG00000037254.18	36803	10	90	9	67		6	90	6	67	4	90	3	67		6.66677	8.95536	0.425763	2.28859		4.44455	4.47775	0.0107379	0.0332039		0	0	0	0
chr2	10153571	10256529	+	Itih5	ENSMUSG00000025780.7	102958	214	1314	92	536		198	1314	85	536	16	1314	7	536		15.0685	15.8582	0.0736955	0.789725		1.21766	1.30599	0.101027	0.088325		0	0	0	0
chr2	10370510	10595253	+	Sfmbt2	ENSMUSG00000061186.15	224743	322	3818	199	2147		288	3818	182	2147	34	3818	17	2147		7.54322	8.47695	0.168365	0.93373		0.890521	0.791807	-0.169501	-0.0987141		3	0.0133486	7.81364	0.034767
chr2	11036873	11060129	+	Gm13264	ENSMUSG00000085257.2	23256	5	66	9	98		2	66	6	98	3	66	3	98		3.03045	6.12254	1.0146	3.09209		4.5456	3.06132	-0.570315	-1.48428		1	0.0429997	2.53844	0.109152
chr2	11172108	11301222	+	Prkcq	ENSMUSG00000026778.13	129114	6272	29630	6912	31759		5930	29630	6427	31759	342	29630	485	31759		20.0135	20.2368	0.0160065	0.223283		1.15424	1.52713	0.403881	0.372891		2	0.0154902	5.31964	0.0412011
chr2	11315372	11319874	-	Gm38171	ENSMUSG00000102196.1	4502	9	50	4	33		4	50	3	33	5	50	1	33		8.00018	9.09118	0.184435	1.091		10.0002	3.0306	-1.72235	-6.96958		0	0	0	0
chr2	11471433	11554077	-	Pfkfb3	ENSMUSG00000026773.19	82644	1143	4059	1354	4093		166	4059	176	4093	977	4059	1178	4093		4.08968	4.30003	0.0723578	0.210347		24.07	28.7808	0.257875	4.71088		2	0.0242002	5.43786	0.0657986
chr2	11521706	11530836	+	Gm10851	ENSMUSG00000102329.1	9130	102	1476	83	1538		64	1476	51	1538	38	1476	32	1538		4.33605	3.316	-0.386937	-1.02005		2.57453	2.08063	-0.30729	-0.493902		0	0	0	0
chr2	11585437	11604153	-	Rbm17	ENSMUSG00000037197.11	18716	3874	8088	4008	8249		266	8088	299	8249	3608	8088	3709	8249		3.28882	3.62468	0.140283	0.335859		44.6093	44.963	0.0113947	0.353728		2	0.10686	5.46741	0.292125
chr2	11642807	11693193	+	Il2ra	ENSMUSG00000026770.5	50386	340	4208	758	8272		259	4208	625	8272	81	4208	133	8272		6.15495	7.55561	0.295802	1.40067		1.92491	1.60783	-0.25967	-0.317072		1	0.0198468	3.04067	0.0603475
chr2	11705290	11734317	+	Il15ra	ENSMUSG00000023206.16	29027	69	836	80	1073		59	836	62	1073	10	836	18	1073		7.05743	5.7782	-0.288522	-1.27923		1.19618	1.67755	0.487915	0.481365		1	0.0344507	2.57185	0.088602
chr2	11742573	11777582	-	Fbh1	ENSMUSG00000058594.15	35009	2210	5996	2664	7198		302	5996	372	7198	1908	5996	2292	7198		5.03669	5.1681	0.0371583	0.131411		31.8212	31.8422	0.000950145	0.020964		0	0	0	0
chr2	11777876	11790329	+	Ankrd16	ENSMUSG00000047909.11	12453	431	1441	693	1969		338	1441	569	1969	93	1441	124	1969		23.4559	28.8979	0.301012	5.44198		6.45386	6.29762	-0.0353556	-0.15624		0	0	0	0
chr2	12106632	12301922	-	Itga8	ENSMUSG00000026768.10	195290	17	164	7	59		1	164	0	59	16	164	7	59		0.609817	0.000169491	-11.8129	-0.609647		9.75615	11.8646	0.282274	2.1084		1	0.00512059	2.86388	0.0146648
chr2	12347263	12419470	-	Mindy3	ENSMUSG00000026767.12	72207	1284	10873	1174	9630		277	10873	298	9630	1007	10873	876	9630		2.5476	3.0945	0.280569	0.546902		9.26147	9.09657	-0.0259185	-0.1649		0	0	0	0
chr2	12924041	13003455	+	Pter	ENSMUSG00000026730.12	79414	31	402	30	579		26	402	26	579	5	402	4	579		6.46768	4.49052	-0.526368	-1.97717		1.24381	0.690863	-0.848289	-0.552942		0	0	0	0
chr2	13076821	13271415	-	Rsu1	ENSMUSG00000026727.10	194594	228	4226	216	4056		22	4226	14	4056	206	4226	202	4056		0.520589	0.34517	-0.592838	-0.175419		4.87459	4.98028	0.0309461	0.10569		0	0	0	0
chr2	13276338	13491813	-	Cubn	ENSMUSG00000026726.10	215475	40	527	64	615		22	527	43	615	18	527	21	615		4.17459	6.99189	0.744047	2.81729		3.41558	3.41465	-0.000392133	-0.000928248		4	0.0185636	10.8697	0.0504454
chr2	13509014	13544668	-	Trdmt1	ENSMUSG00000026723.10	35654	263	1448	451	1961		18	1448	36	1961	245	1448	415	1961		1.2431	1.8358	0.562468	0.592702		16.9199	21.1627	0.322801	4.24278		1	0.0280473	2.86388	0.0803242
chr2	13573927	13582826	+	Vim	ENSMUSG00000026728.9	8899	2358	8056	2346	7983		2316	8056	2311	7983	42	8056	35	7983		28.7488	28.949	0.0100147	0.200258		0.521352	0.438433	-0.249901	-0.0829189		0	0	0	0
chr2	13651021	13794064	-	St8sia6	ENSMUSG00000003418.11	143043	51	1423	6	267		3	1423	2	267	48	1423	4	267		0.210829	0.749101	1.82909	0.538272		3.37316	1.49816	-1.17091	-1.875		1	0.0069909	2.53844	0.017746
chr2	13850282	14056135	-	Hacd1	ENSMUSG00000063275.15	205853	90	850	75	654		22	850	12	654	68	850	63	654		2.58825	1.83488	-0.496291	-0.753369		8.00001	9.63304	0.267989	1.63303		1	0.00485784	2.60353	0.0126475
chr2	14074098	14149634	+	Stam	ENSMUSG00000026718.17	75536	1512	9565	1409	9310		1211	9565	1169	9310	301	9565	240	9310		12.6607	12.5564	-0.0119401	-0.104351		3.14689	2.57787	-0.287745	-0.569016		0	0	0	0
chr2	14229392	14332057	+	Mrc1	ENSMUSG00000026712.3	102665	345	1075	501	1234		319	1075	486	1234	26	1075	15	1234		29.6744	39.3841	0.408394	9.7097		2.41861	1.21557	-0.992551	-1.20305		0	0	0	0
chr2	14388316	14494977	+	Slc39a12	ENSMUSG00000036949.16	106661	3	53	1	53		2	53	0	53	1	53	1	53		3.77377	0.000188679	-14.2878	-3.77358		1.88698	1.88698	3.20343e-16	0		0	0	0	0
chr2	14603088	14987908	+	Cacnb2	ENSMUSG00000057914.15	384820	14	295	11	229		10	295	7	229	4	295	4	229		3.38986	3.05681	-0.1492	-0.333052		1.35597	1.74677	0.365367	0.390802		2	0.00519724	5.34259	0.0138833
chr2	14740372	14767024	-	Gm13269	ENSMUSG00000087086.7	26652	1	55	1	51		1	55	1	51	0	55	0	51		1.81836	1.96098	0.108934	0.142616		0.000181818	0.000196078	0.108934	1.42602e-05		0	0	0	0
chr2	14995131	15055069	-	Nsun6	ENSMUSG00000026707.15	59938	293	2083	269	2227		29	2083	35	2227	264	2083	234	2227		1.39223	1.57163	0.174862	0.179398		12.674	10.5074	-0.270468	-2.16662		1	0.0166839	2.66861	0.0445228
chr2	15049395	15082456	+	Arl5b	ENSMUSG00000017418.13	33061	371	1012	238	846		337	1012	207	846	34	1012	31	846		33.3004	24.4681	-0.444638	-8.83231		3.35969	3.66431	0.125214	0.304621		1	0.0302471	2.79879	0.0846553
chr2	15526479	16255555	+	Malrd1	ENSMUSG00000075520.5	729076	4	61	0	49		4	61	0	49	0	61	0	49		6.55753	0.000204081	-14.9717	-6.55733		0.000163934	0.000204081	0.316027	4.01471e-05		1	0.0013716	2.53844	0.00348172
chr2	16356304	16755839	+	Plxdc2	ENSMUSG00000026748.13	399535	1124	66565	2322	101820		953	66565	2065	101820	171	66565	257	101820		1.43168	2.02809	0.502408	0.596405		0.256892	0.252406	-0.0254135	-0.0044856		3	0.00750873	8.58088	0.0214772
chr2	17343909	17731464	-	Nebl	ENSMUSG00000053702.16	387555	3505	24112	3454	22511		791	24112	647	22511	2714	24112	2807	22511		3.28052	2.87415	-0.190791	-0.406374		11.2558	12.4695	0.14773	1.21365		4	0.0103211	10.7395	0.027711
chr2	18055237	18212388	+	Mllt10	ENSMUSG00000026743.16	157151	3871	29952	3582	30229		3141	29952	2865	30229	730	29952	717	30229		10.4868	9.47765	-0.14597	-1.00912		2.43723	2.37189	-0.0392043	-0.0653384		0	0	0	0
chr2	18195654	18392830	-	Dnajc1	ENSMUSG00000026740.12	197176	718	7052	793	7270		107	7052	124	7270	611	7052	669	7270		1.5173	1.70564	0.168806	0.18834		8.66421	9.2022	0.0869109	0.537992		1	0.00507161	2.53844	0.012874
chr2	18672384	18676231	+	Commd3	ENSMUSG00000051154.11	3847	749	1121	679	975		681	1121	617	975	68	1121	62	975		60.7493	63.2821	0.0589278	2.53272		6.06602	6.35898	0.0680458	0.292963		1	0.259943	2.71394	0.705469
chr2	18677018	18686629	+	Bmi1	ENSMUSG00000026739.13	9611	1308	1899	1338	1837		1241	1899	1248	1837	67	1899	90	1837		65.3502	67.9369	0.0560031	2.58667		3.52818	4.8993	0.473652	1.37112		0	0	0	0
chr2	18842255	18998126	-	Pip4k2a	ENSMUSG00000026737.12	155871	4299	156450	2563	101412		389	156450	281	101412	3910	156450	2282	101412		0.248642	0.277088	0.156273	0.0284458		2.4992	2.25023	-0.151397	-0.248974		6	0.0384934	16.083	0.103181
chr2	19199302	19310241	+	Armc3	ENSMUSG00000037683.14	110939	18	176	17	214		18	176	17	214	0	176	0	214		10.2273	7.94397	-0.364497	-2.28336		5.68181e-05	4.6729e-05	-0.282035	-1.00892e-05		3	0.0270419	7.81058	0.0704043
chr2	19371440	19394976	+	Msrb2	ENSMUSG00000023094.14	23536	357	2573	324	2261		316	2573	295	2261	41	2573	29	2261		12.2814	13.0473	0.0872809	0.765941		1.59347	1.28262	-0.313079	-0.310852		0	0	0	0
chr2	19909780	20810713	+	Etl4	ENSMUSG00000036617.16	900933	17	558	6	166		10	558	6	166	7	558	0	166		1.79213	3.61452	1.01213	1.82238		1.2545	6.02409e-05	-14.346	-1.25444		2	0.00221992	5.53249	0.00614085
chr2	20847919	20968881	-	Arhgap21	ENSMUSG00000036591.16	120962	323	2722	329	3014		44	2722	44	3014	279	2722	285	3014		1.61646	1.45986	-0.147012	-0.156605		10.2498	9.45588	-0.116316	-0.793944		0	0	0	0
chr2	20921860	20931389	-	Gm13380	ENSMUSG00000085206.1	9529	2	111	0	119		1	111	0	119	1	111	0	119		0.90099	8.40335e-05	-13.3883	-0.900906		0.90099	8.40335e-05	-13.3883	-0.900906		0	0	0	0
chr2	21205724	21215009	+	Thnsl1	ENSMUSG00000048550.17	9285	62	222	37	154		45	222	30	154	17	222	7	154		20.2703	19.4806	-0.0573319	-0.789734		7.6577	4.54552	-0.752467	-3.11218		0	0	0	0
chr2	22755984	22762273	+	1700092C17Rik	ENSMUSG00000085353.2	6289	6	119	4	106		6	119	4	106	0	119	0	106		5.0421	3.77368	-0.418053	-1.26842		8.40335e-05	9.43395e-05	0.166897	1.0306e-05		0	0	0	0
chr2	22774094	22875653	+	Apbb1ip	ENSMUSG00000026786.14	101559	2236	40556	2416	44848		1875	40556	2004	44848	361	40556	412	44848		4.62324	4.46843	-0.0491364	-0.15481		0.890127	0.918659	0.0455172	0.0285313		3	0.0295395	7.87567	0.0775477
chr2	22895522	22940266	+	Pdss1	ENSMUSG00000026784.14	44744	411	4836	494	4858		256	4836	342	4858	155	4836	152	4858		5.29363	7.03994	0.411304	1.7463		3.20513	3.12886	-0.0347451	-0.0762686		0	0	0	0
chr2	22940073	23040241	-	Abi1	ENSMUSG00000058835.14	100168	3048	29028	2919	25869		428	29028	335	25869	2620	29028	2584	25869		1.47444	1.29499	-0.187229	-0.179452		9.02577	9.98879	0.14626	0.963021		1	0.00998323	2.53844	0.0253418
chr2	23068167	23115558	+	Acbd5	ENSMUSG00000026781.17	47391	1025	7896	1098	7416		870	7896	986	7416	155	7896	112	7416		11.0182	13.2956	0.271053	2.27734		1.96302	1.51025	-0.378288	-0.452771		0	0	0	0
chr2	23115606	23156024	-	Mastl	ENSMUSG00000026779.6	40418	480	2630	624	3619		61	2630	57	3619	419	2630	567	3619		2.3194	1.57502	-0.558375	-0.744372		15.9316	15.6673	-0.0241299	-0.264248		0	0	0	0
chr2	23156369	23199260	+	Yme1l1	ENSMUSG00000026775.9	42891	9655	19043	8919	17669		9356	19043	8627	17669	299	19043	292	17669		49.1309	48.8256	-0.00899252	-0.305287		1.57013	1.65261	0.0738633	0.0824812		0	0	0	0
chr2	23506220	23572106	-	Spopl	ENSMUSG00000026771.14	65886	1291	19631	1165	19707		231	19631	245	19707	1060	19631	920	19707		1.17671	1.24321	0.0793144	0.0665028		5.39962	4.66839	-0.209933	-0.731231		0	0	0	0
chr2	24367580	24414954	+	Psd4	ENSMUSG00000026979.16	47374	7348	20828	5852	16607		6414	20828	5043	16607	934	20828	809	16607		30.7951	30.3667	-0.0202093	-0.428371		4.48435	4.87144	0.11945	0.387092		1	0.0211086	2.53844	0.053583
chr2	24603887	24763152	-	Cacna1b	ENSMUSG00000004113.18	159265	46	394	17	149		4	394	5	149	42	394	12	149		1.01525	3.35577	1.7248	2.34052		10.6599	8.05375	-0.404464	-2.60617		1	0.00627884	2.92593	0.0183715
chr2	24789928	24919614	-	Ehmt1	ENSMUSG00000036893.17	129686	3926	23832	4356	24390		552	23832	642	24390	3374	23832	3714	24390		2.31621	2.63223	0.184515	0.316013		14.1574	15.2276	0.105124	1.07012		1	0.00771093	2.53844	0.0195737
chr2	24925352	24935252	-	Arrdc1	ENSMUSG00000026972.15	9900	707	1667	953	2324		73	1667	89	2324	634	1667	864	2324		4.37913	3.82961	-0.193447	-0.549522		38.0324	37.1773	-0.0328075	-0.855114		0	0	0	0
chr2	24949792	24962075	+	Zmynd19	ENSMUSG00000026974.11	12283	459	1316	733	1688		424	1316	702	1688	35	1316	31	1688		32.2189	41.5877	0.368251	9.36883		2.65958	1.8365	-0.534242	-0.823083		0	0	0	0
chr2	24962400	24972163	+	Dph7	ENSMUSG00000026975.10	9763	455	1704	395	1746		394	1704	341	1746	61	1704	54	1746		23.1221	19.5304	-0.243552	-3.59171		3.57982	3.09279	-0.210978	-0.487029		0	0	0	0
chr2	24974117	24975098	-	Mrpl41	ENSMUSG00000036850.4	981	47	60	40	44		26	60	23	44	21	60	17	44		43.3334	52.2728	0.270581	8.93941		35.0001	38.6365	0.142605	3.63639		0	0	0	0
chr2	24976033	25054057	+	Pnpla7	ENSMUSG00000036833.16	78024	2516	6822	2167	5922		2049	6822	1824	5922	467	6822	343	5922		30.0352	30.8004	0.036296	0.765225		6.8455	5.79196	-0.241104	-1.05354		1	0.0128166	2.55896	0.0327971
chr2	25054355	25062881	+	Nsmf	ENSMUSG00000006476.19	8526	153	228	156	243		124	228	140	243	29	228	16	243		54.386	57.6132	0.0831641	3.2272		12.7193	6.5844	-0.949899	-6.13494		0	0	0	0
chr2	25180781	25183339	-	Gm38287	ENSMUSG00000103217.1	2558	9	63	26	122		7	63	17	122	2	63	9	122		11.1113	13.9345	0.326639	2.82324		3.17476	7.37713	1.21641	4.20237		0	0	0	0
chr2	25192966	25196886	-	Tor4a	ENSMUSG00000059555.6	3920	54	176	74	188		37	176	47	188	17	176	27	188		21.0228	25	0.249977	3.97727		9.65914	14.3617	0.572264	4.70261		0	0	0	0
chr2	25199712	25211489	-	Nelfb	ENSMUSG00000013465.19	11777	2259	2923	3058	3835		379	2923	499	3835	1880	2923	2559	3835		12.9661	13.0117	0.00506514	0.0456026		64.3175	66.7275	0.0530707	2.41003		0	0	0	0
chr2	25218745	25222280	+	Fam166a	ENSMUSG00000026969.3	3535	95	212	76	196		65	212	46	196	30	212	30	196		30.6604	23.4694	-0.385594	-7.19098		14.151	15.3062	0.113211	1.15518		0	0	0	0
chr2	25222160	25224702	-	Tubb4b	ENSMUSG00000036752.4	2542	937	1026	1023	1101		90	1026	87	1101	847	1026	936	1101		8.77194	7.90192	-0.150693	-0.870023		82.5536	85.0136	0.0423628	2.46002		1	0.393391	2.7474	1.0808
chr2	25244821	25256022	-	Ndor1	ENSMUSG00000006471.18	11201	312	1241	338	1286		50	1241	70	1286	262	1241	268	1286		4.02902	5.44324	0.434038	1.41423		21.112	20.8398	-0.0187213	-0.272193		0	0	0	0
chr2	25244863	25255386	-	Ndor1	ENSMUSG00000115074.1	10523	108	158	110	163		48	158	46	163	60	158	64	163		30.3798	28.2209	-0.106348	-2.15889		37.9747	39.2638	0.0481619	1.28912		0	0	0	0
chr2	25262618	25269885	+	Tprn	ENSMUSG00000048707.9	7267	79	284	89	311		60	284	66	311	19	284	23	311		21.1268	21.2219	0.0064797	0.0951019		6.69017	7.39553	0.14461	0.705354		0	0	0	0
chr2	25271039	25272438	-	Ssna1	ENSMUSG00000026966.6	1399	62	74	54	68		26	74	20	68	36	74	34	68		35.1352	29.4119	-0.25652	-5.72335		48.6487	50.0001	0.0395284	1.35136		0	0	0	0
chr2	25272478	25285915	+	Anapc2	ENSMUSG00000026965.12	13437	1627	3567	1955	3851		1466	3567	1775	3851	161	3567	180	3851		41.099	46.0919	0.165412	4.99296		4.5136	4.67411	0.0504142	0.160514		0	0	0	0
chr2	25327450	25332571	-	AA543186	ENSMUSG00000097345.1	5121	6	102	7	124		2	102	0	124	4	102	7	124		1.96088	8.06451e-05	-14.5696	-1.9608		3.92166	5.64524	0.525569	1.72357		0	0	0	0
chr2	25332338	25352212	+	Man1b1	ENSMUSG00000036646.13	19874	1860	3693	1939	4021		1734	3693	1814	4021	126	3693	125	4021		46.9537	45.1132	-0.0576905	-1.84054		3.41186	3.10868	-0.134257	-0.303181		0	0	0	0
chr2	25352276	25356359	-	Dpp7	ENSMUSG00000026958.13	4083	141	188	110	153		31	188	25	153	110	188	85	153		16.4894	16.3399	-0.0131382	-0.149482		58.5107	55.5556	-0.0747676	-2.95508		0	0	0	0
chr2	25359889	25365682	-	Uap1l1	ENSMUSG00000026956.15	5793	115	162	170	230		14	162	17	230	101	162	153	230		8.64203	7.39134	-0.225534	-1.25069		62.3457	66.5218	0.0935361	4.17605		0	0	0	0
chr2	25372321	25378213	+	Sapcd2	ENSMUSG00000026955.13	5892	74	266	230	724		45	266	139	724	29	266	91	724		16.9173	19.1989	0.182523	2.28158		10.9023	12.5691	0.205247	1.66678		0	0	0	0
chr2	25428703	25448540	+	Abca2	ENSMUSG00000026944.18	19837	2442	3571	2784	4083		2271	3571	2577	4083	171	3571	207	4083		63.5956	63.1154	-0.0109366	-0.480275		4.78858	5.0698	0.0823329	0.281227		1	0.0504108	2.67116	0.134655
chr2	25455141	25461094	-	Paxx	ENSMUSG00000047617.11	5953	269	1166	213	1016		76	1166	55	1016	193	1166	158	1016		6.51802	5.4134	-0.2679	-1.10462		16.5523	15.5512	-0.0900088	-1.00113		0	0	0	0
chr2	25456838	25458776	+	Clic3	ENSMUSG00000015093.15	1938	245	615	227	531		139	615	121	531	106	615	106	531		22.6016	22.7872	0.0117968	0.18557		17.2358	19.9624	0.211875	2.72656		0	0	0	0
chr2	25500750	25505471	+	Fbxw5	ENSMUSG00000015095.12	4721	608	667	594	647		505	667	514	647	103	667	80	647		75.7121	79.4436	0.069406	3.73144		15.4423	12.3648	-0.320651	-3.07752		1	0.21182	2.74543	0.581536
chr2	25517982	25546940	-	Traf2	ENSMUSG00000026942.13	28958	1399	6089	1264	5307		119	6089	124	5307	1280	6089	1140	5307		1.95435	2.33654	0.257687	0.382193		21.0215	21.4811	0.0311988	0.459549		0	0	0	0
chr2	25557847	25562082	+	Edf1	ENSMUSG00000015092.9	4235	1292	2756	1717	1973		1227	2756	1651	1973	65	2756	66	1973		44.521	83.6797	0.91039	39.1586		2.35849	3.34516	0.504211	0.98667		0	0	0	0
chr2	25563115	25574845	-	Mamdc4	ENSMUSG00000026941.16	11730	1615	2116	1311	1752		603	2116	467	1752	1012	2116	844	1752		28.4972	26.6553	-0.0963985	-1.84191		47.8261	48.1735	0.0104425	0.34743		0	0	0	0
chr2	25583018	25608521	-	Rabl6	ENSMUSG00000015087.14	25503	1362	4284	1504	4345		161	4284	172	4345	1201	4284	1332	4345		3.75817	3.95858	0.0749501	0.200403		28.0345	30.6559	0.12896	2.62138		0	0	0	0
chr2	25608635	25617678	-	Ccdc183	ENSMUSG00000026940.3	9043	8	52	13	53		4	52	5	53	4	52	8	53		7.69249	9.43413	0.29444	1.74165		7.69249	15.0945	0.972501	7.40201		2	0.221166	5.27474	0.583295
chr2	25926838	25983282	-	Camsap1	ENSMUSG00000026933.17	56444	971	7325	721	6213		155	7325	114	6213	816	7325	607	6213		2.11604	1.83486	-0.205695	-0.281178		11.1399	9.76984	-0.189334	-1.37009		0	0	0	0
chr2	25998543	26021747	-	Ubac1	ENSMUSG00000036352.16	23204	951	3621	1014	3863		51	3621	99	3863	900	3621	915	3863		1.40845	2.56278	0.863596	1.15432		24.855	23.6863	-0.0694868	-1.16876		0	0	0	0
chr2	26055535	26123220	-	Nacc2	ENSMUSG00000026932.14	67685	14	496	9	523		11	496	3	523	3	496	6	523		2.21776	0.573633	-1.9509	-1.64413		0.604859	1.14725	0.923505	0.542388		1	0.0147743	2.66861	0.0394269
chr2	26138546	26139543	+	1810012K08Rik	ENSMUSG00000087595.1	997	32	89	56	130		25	89	36	130	7	89	20	130		28.09	27.6924	-0.0205668	-0.397605		7.86527	15.3847	0.967926	7.51941		0	0	0	0
chr2	26208637	26237525	-	Qsox2	ENSMUSG00000036327.18	28888	512	2448	580	2412		57	2448	47	2412	455	2448	533	2412		2.32844	1.94859	-0.256927	-0.379841		18.5866	22.0978	0.249643	3.51124		0	0	0	0
chr2	26243469	26294557	-	Ccdc187	ENSMUSG00000048038.8	51088	8	104	6	61		4	104	4	61	4	104	2	61		3.84625	6.55753	0.769701	2.71128		3.84625	3.27885	-0.230263	-0.567399		2	0.0391481	5.40381	0.105775
chr2	26315515	26348237	+	Gpsm1	ENSMUSG00000026930.15	32722	503	2617	939	4705		392	2617	727	4705	111	2617	212	4705		14.979	15.4516	0.0448208	0.472662		4.2415	4.50585	0.0872232	0.264345		0	0	0	0
chr2	26348121	26352110	-	Dnlz	ENSMUSG00000075467.4	3989	285	749	241	621		87	749	62	621	198	749	179	621		11.6155	9.98391	-0.218374	-1.63159		26.4353	28.8245	0.124832	2.38923		0	0	0	0
chr2	26352176	26360918	-	Card9	ENSMUSG00000026928.14	8742	756	1444	192	421		127	1444	31	421	629	1444	161	421		8.79502	7.36344	-0.256306	-1.43158		43.5596	38.2423	-0.18782	-5.31727		0	0	0	0
chr2	26362765	26380653	-	Snapc4	ENSMUSG00000036281.13	17888	1061	2089	1119	2003		171	2089	148	2003	890	2089	971	2003		8.18574	7.38892	-0.147749	-0.796818		42.6041	48.4773	0.186316	5.87317		2	0.111807	5.66021	0.316425
chr2	26381526	26389018	+	Gm13563	ENSMUSG00000085767.1	7492	421	788	324	611		109	788	91	611	312	788	233	611		13.8325	14.8936	0.106634	1.06113		39.5939	38.1342	-0.0541927	-1.4597		0	0	0	0
chr2	26382802	26389316	-	Entr1	ENSMUSG00000026927.17	6514	603	1636	498	1277		73	1636	55	1277	530	1636	443	1277		4.46211	4.30698	-0.05105	-0.155132		32.3961	34.6907	0.0987286	2.29459		0	0	0	0
chr2	26389339	26397122	+	Pmpca	ENSMUSG00000026926.14	7783	1905	3119	2347	3186		1627	3119	2111	3186	278	3119	236	3186		52.1642	66.2586	0.34505	14.0945		8.91312	7.40741	-0.266961	-1.50571		1	0.128485	2.7337	0.35124
chr2	26396249	26409203	-	Inpp5e	ENSMUSG00000026925.16	12954	730	1782	847	1754		147	1782	151	1754	583	1782	696	1754		8.24916	8.6089	0.061581	0.359736		32.7161	39.6807	0.27844	6.96468		1	0.0771962	2.59102	0.200017
chr2	26409431	26445216	-	Sec16a	ENSMUSG00000026924.17	35785	3428	7894	3367	7437		354	7894	340	7437	3074	7894	3027	7437		4.48442	4.57174	0.0278211	0.0873174		38.941	40.7019	0.0638073	1.76093		3	0.083834	8.18734	0.228793
chr2	26457903	26516663	-	Notch1	ENSMUSG00000026923.15	58760	8281	20279	8393	20469		817	20279	892	20469	7464	20279	7501	20469		4.0288	4.35781	0.113254	0.329011		36.8065	36.6457	-0.00632015	-0.160889		2	0.0340368	5.27214	0.0897233
chr2	26580014	26593120	+	Egfl7	ENSMUSG00000026921.18	13106	43	59	60	84		23	59	40	84	20	59	20	84		38.9832	47.6191	0.28869	8.63596		33.8984	23.8096	-0.509674	-10.0888		0	0	0	0
chr2	26586639	26635634	+	Gm20532	ENSMUSG00000092356.1	48995	45	89	25	74		26	89	13	74	19	89	12	74		29.2136	17.5677	-0.733715	-11.6459		21.3484	16.2163	-0.396681	-5.13207		0	0	0	0
chr2	26593057	26604417	-	Agpat2	ENSMUSG00000026922.13	11360	72	223	80	226		5	223	11	226	67	223	69	226		2.2422	4.8673	1.11821	2.6251		30.0449	30.531	0.0231561	0.48613		0	0	0	0
chr2	26628457	26636497	+	Fam69b	ENSMUSG00000036186.5	8040	21	555	30	468		18	555	16	468	3	555	14	468		3.24326	3.41882	0.0760552	0.175563		0.540558	2.99147	2.46833	2.45092		0	0	0	0
chr2	26667674	26671282	-	Lcn4	ENSMUSG00000026919.1	3608	52	128	24	69		25	128	10	69	27	128	14	69		19.5313	14.4929	-0.430445	-5.03844		21.0938	20.29	-0.056053	-0.803841		0	0	0	0
chr2	26888628	26902879	-	Surf6	ENSMUSG00000036160.13	14251	410	2122	456	2151		63	2122	64	2151	347	2122	392	2151		2.9689	2.97536	0.00313717	0.00646297		16.3525	18.2241	0.156335	1.87158		1	0.0701705	2.66419	0.186948
chr2	26905262	26910677	-	Med22	ENSMUSG00000015776.12	5415	341	554	293	519		22	554	22	519	319	554	271	519		3.97114	4.23894	0.0941514	0.267803		57.5812	52.2158	-0.141112	-5.36543		0	0	0	0
chr2	26910764	26913318	+	Rpl7a	ENSMUSG00000062647.16	2554	461	767	499	729		390	767	435	729	71	767	64	729		50.8475	59.6708	0.230849	8.82332		9.25686	8.77916	-0.0764391	-0.477695		0	0	0	0
chr2	26913381	26916530	-	Surf1	ENSMUSG00000015790.16	3149	1302	1581	1452	1714		126	1581	120	1714	1176	1581	1332	1714		7.96965	7.00117	-0.186919	-0.968473		74.3833	77.713	0.0631763	3.32965		0	0	0	0
chr2	26916367	26920183	+	Surf2	ENSMUSG00000014873.15	3816	75	130	82	143		29	130	32	143	46	130	50	143		22.3078	22.3777	0.00451512	0.0699246		35.3847	34.9651	-0.0172094	-0.419585		1	0.262055	2.60746	0.683297
chr2	26920040	26933928	-	Surf4	ENSMUSG00000014867.9	13888	2221	6233	2271	6564		137	6233	109	6564	2084	6233	2162	6564		2.19798	1.66057	-0.404496	-0.537406		33.4349	32.9372	-0.0216373	-0.49771		0	0	0	0
chr2	26934047	26953496	+	Stkld1	ENSMUSG00000049897.14	19449	245	1030	222	912		138	1030	138	912	107	1030	84	912		13.3981	15.1316	0.175539	1.73352		10.3884	9.21054	-0.173611	-1.17782		0	0	0	0
chr2	26953563	26964386	-	Rexo4	ENSMUSG00000052406.14	10823	1563	4341	1664	4686		338	4341	346	4686	1225	4341	1318	4686		7.78623	7.3837	-0.0765807	-0.402528		28.2193	28.1263	-0.00476092	-0.0929707		0	0	0	0
chr2	27009926	27021089	+	Cacfd1	ENSMUSG00000015488.14	11163	327	1533	368	1602		241	1533	256	1602	86	1533	112	1602		15.7208	15.98	0.0235942	0.259216		5.60992	6.99127	0.317573	1.38135		1	0.0895817	2.99925	0.268678
chr2	27021363	27027998	-	Slc2a6	ENSMUSG00000036067.12	6635	95	263	81	224		45	263	44	224	50	263	37	224		17.1103	19.6429	0.199143	2.5326		19.0114	16.5179	-0.202838	-2.49354		0	0	0	0
chr2	27079379	27108981	+	Adamtsl2	ENSMUSG00000036040.14	29602	275	1138	88	333		227	1138	65	333	48	1138	23	333		19.9473	19.5195	-0.0312729	-0.427739		4.21793	6.90693	0.711509	2.689		2	0.067563	5.19294	0.175425
chr2	27110380	27142491	-	Fam163b	ENSMUSG00000009216.7	32111	9	407	0	198		2	407	0	198	7	407	0	198		0.491425	5.0505e-05	-13.2483	-0.491374		1.71993	5.0505e-05	-15.0556	-1.71988		5	0.15571	13.3904	0.417003
chr2	27188393	27248337	-	Sardh	ENSMUSG00000009614.16	59944	41	163	16	76		5	163	1	76	36	163	15	76		3.06754	1.31592	-1.22101	-1.75162		22.0859	19.7369	-0.162229	-2.34899		2	0.0333645	5.18788	0.0865454
chr2	27262104	27427033	-	Vav2	ENSMUSG00000009621.18	164929	2177	15101	1637	11982		260	15101	211	11982	1917	15101	1426	11982		1.72174	1.76098	0.0325069	0.0392347		12.6945	11.9012	-0.093101	-0.793338		1	0.00606322	2.85289	0.0172977
chr2	27326704	27331297	+	AA645442	ENSMUSG00000086669.1	4593	17	559	18	455		10	559	13	455	7	559	5	455		1.78893	2.85716	0.67549	1.06824		1.25225	1.09892	-0.188437	-0.153331		0	0	0	0
chr2	27445579	27507662	-	Brd3	ENSMUSG00000026918.16	62083	1507	8753	1871	10436		197	8753	264	10436	1310	8753	1607	10436		2.25066	2.52971	0.168623	0.279048		14.9663	15.3986	0.0410837	0.432323		6	0.0966448	16.7274	0.269436
chr2	27515157	27536535	+	Wdr5	ENSMUSG00000026917.15	21378	2333	4780	2534	5009		2182	4780	2384	5009	151	4780	150	5009		45.6485	47.5943	0.0602211	1.94579		3.159	2.99461	-0.077098	-0.164386		0	0	0	0
chr2	27540426	27543362	+	Gm13421	ENSMUSG00000085929.1	2936	19	201	41	221		5	201	25	221	14	201	16	221		2.48761	11.3123	2.18505	8.82465		6.96522	7.23986	0.055793	0.274641		0	0	0	0
chr2	27676440	27762957	+	Rxra	ENSMUSG00000015846.14	86517	158	2112	138	2220		131	2112	127	2220	27	2112	11	2220		6.20266	5.72072	-0.116688	-0.481931		1.27841	0.4955	-1.3674	-0.782914		6	0.0693505	16.097	0.186056
chr2	27886425	28039514	+	Col5a1	ENSMUSG00000026837.15	153089	74	134	48	78		69	134	38	78	5	134	10	78		51.4926	48.718	-0.079909	-2.77456		3.73142	12.8206	1.78067	9.08921		5	0.0326607	13.2094	0.0862859
chr2	28192992	28230736	+	Olfm1	ENSMUSG00000026833.18	37744	13	59	14	81		10	59	13	81	3	59	1	81		16.9493	16.0495	-0.078698	-0.899807		5.08491	1.23469	-2.04207	-3.85022		4	0.105977	11.3285	0.30014
chr2	28468066	28471178	+	Mrps2	ENSMUSG00000035772.11	3112	213	215	237	237		202	215	220	237	11	215	17	237		93.9535	92.827	-0.0174022	-1.12648		5.11632	7.17303	0.487476	2.05671		0	0	0	0
chr2	28496891	28505415	+	Gbgt1	ENSMUSG00000026829.9	8524	13	63	17	64		11	63	13	64	2	63	4	64		17.4604	20.3126	0.218286	2.85218		3.17476	6.25015	0.977244	3.07539		0	0	0	0
chr2	28513125	28553081	+	Ralgds	ENSMUSG00000026821.15	39956	290	1600	173	1068		274	1600	156	1068	16	1600	17	1068		17.125	14.6067	-0.229469	-2.51826		1.00001	1.59177	0.670623	0.591763		1	0.0250275	2.5817	0.0646136
chr2	28562197	28576698	+	Gm13381	ENSMUSG00000087667.8	14501	12	136	15	139		9	136	4	139	3	136	11	139		6.61772	2.87777	-1.20138	-3.73995		2.20595	7.91374	1.84296	5.70778		0	0	0	0
chr2	28566311	28583751	-	Gtf3c5	ENSMUSG00000026816.14	17440	657	1277	934	1617		83	1277	107	1617	574	1277	827	1617		6.49962	6.6172	0.025866	0.117582		44.9491	51.1441	0.186275	6.19499		1	0.0573394	2.92897	0.167946
chr2	28641228	28691167	+	Tsc1	ENSMUSG00000026812.16	49939	841	4035	1154	5012		733	4035	1012	5012	108	4035	142	5012		18.166	20.1915	0.152506	2.02549		2.67658	2.8332	0.0820416	0.15662		1	0.0200244	2.76527	0.055373
chr2	28692080	28699727	-	Spaca9	ENSMUSG00000026809.15	7647	11	59	6	45		3	59	2	45	8	59	4	45		5.08491	4.44466	-0.194149	-0.64025		13.5595	8.88909	-0.609193	-4.67038		0	0	0	0
chr2	28700164	28813165	+	Ak8	ENSMUSG00000026807.8	113001	12	98	13	111		11	98	10	111	1	98	3	111		11.2246	9.00909	-0.317208	-2.21549		1.02051	2.70279	1.40516	1.68228		3	0.0265484	8.17242	0.0723217
chr2	28822299	28840360	-	Gtf3c4	ENSMUSG00000035666.14	18061	480	1708	440	1669		47	1708	39	1669	433	1708	401	1669		2.75176	2.33673	-0.235862	-0.415028		25.3513	24.0264	-0.0774407	-1.32492		0	0	0	0
chr2	28840406	28905571	+	Ddx31	ENSMUSG00000026806.15	65165	1778	9179	1404	7714		1542	9179	1213	7714	236	9179	191	7714		16.7992	15.7247	-0.0953653	-1.07456		2.57109	2.47602	-0.0543562	-0.0950683		1	0.0153457	2.7337	0.0419504
chr2	28907679	28916668	-	Barhl1	ENSMUSG00000026805.14	8989	4	61	2	43		2	61	1	43	2	61	1	43		3.27885	2.32581	-0.495456	-0.953039		3.27885	2.32581	-0.495456	-0.953039		0	0	0	0
chr2	28926949	29055066	-	Cfap77	ENSMUSG00000079502.8	128117	1	182	5	324		0	182	3	324	1	182	2	324		5.4945e-05	0.925957	14.0407	0.925902		0.549505	0.617315	0.167873	0.0678094		3	0.0234161	8.67301	0.067696
chr2	29060262	29087656	+	Ttf1	ENSMUSG00000026803.17	27394	717	4421	860	5017		615	4421	746	5017	102	4421	114	5017		13.9109	14.8694	0.096137	0.958564		2.30717	2.27228	-0.0219877	-0.0348963		1	0.0365043	2.68758	0.0981083
chr2	29124181	29182471	+	Setx	ENSMUSG00000043535.13	58290	7230	19851	7838	20478		6572	19851	7117	20478	658	19851	721	20478		33.1066	34.7544	0.0700736	1.64773		3.31469	3.52085	0.0870485	0.206157		0	0	0	0
chr2	29194541	29253005	-	Ntng2	ENSMUSG00000035513.19	58464	49	397	70	612		15	397	24	612	34	397	46	612		3.77836	3.92158	0.0536758	0.143223		8.56425	7.51635	-0.188295	-1.0479		3	0.0513136	8.01589	0.137108
chr2	29346819	29524793	+	Med27	ENSMUSG00000026799.15	177974	335	7927	195	6739		120	7927	126	6739	215	7927	69	6739		1.51381	1.86972	0.30463	0.3559		2.71225	1.02389	-1.40543	-1.68836		5	0.028094	12.9648	0.0728463
chr2	29619720	29740978	+	Rapgef1	ENSMUSG00000039844.19	121258	4600	42566	5089	40177		4179	42566	4681	40177	421	42566	408	40177		9.8177	11.6509	0.246991	1.83325		0.989053	1.01551	0.0380806	0.0264541		5	0.0412344	13.693	0.112925
chr2	29738335	29738665	-	Gm9823	ENSMUSG00000048316.3	330	301	152	387	194		150	152	193	194	151	152	194	194		98.6842	99.4845	0.011653	0.800325		99.3421	100	0.00952277	0.657894		0	0	0	0
chr2	29761224	29788502	-	Trub2	ENSMUSG00000039826.13	27278	348	1312	237	1319		83	1312	86	1319	265	1312	151	1319		6.32623	6.5201	0.0435484	0.193871		20.1982	11.4481	-0.81912	-8.7501		1	0.0366596	2.91294	0.106787
chr2	29787493	29797935	+	Coq4	ENSMUSG00000026798.10	10442	114	356	130	393		98	356	125	393	16	356	5	393		27.5281	31.8066	0.208422	4.27852		4.49441	1.27229	-1.8207	-3.22212		0	0	0	0
chr2	29802634	29817522	+	Slc27a4	ENSMUSG00000059316.2	14888	614	1115	606	1191		571	1115	568	1191	43	1115	38	1191		51.2108	47.691	-0.10273	-3.51975		3.85651	3.1906	-0.273466	-0.665907		0	0	0	0
chr2	29820075	29845002	+	Urm1	ENSMUSG00000069020.9	24927	332	1617	440	1965		304	1617	412	1965	28	1617	28	1965		18.8003	20.9669	0.157363	2.16667		1.73161	1.42494	-0.28121	-0.306666		0	0	0	0
chr2	29869164	29882840	+	Cercam	ENSMUSG00000039787.13	13676	85	162	136	245		80	162	125	245	5	162	11	245		49.3827	51.0204	0.0470679	1.63768		3.08648	4.48983	0.5407	1.40336		0	0	0	0
chr2	29889221	29931746	+	Odf2	ENSMUSG00000026790.19	42525	3408	8837	4423	10455		3192	8837	4150	10455	216	8837	273	10455		36.1209	39.6939	0.136086	3.57307		2.44427	2.61119	0.095305	0.166922		3	0.0705467	8.13602	0.191323
chr2	29935426	29960371	+	Gle1	ENSMUSG00000019715.14	24945	1655	3159	1929	3439		1579	3159	1868	3439	76	3159	61	3439		49.9842	54.3181	0.119962	4.33394		2.40583	1.77377	-0.439711	-0.632053		1	0.0400882	2.76429	0.110815
chr2	29965560	30031451	+	Sptan1	ENSMUSG00000057738.13	65891	18037	27484	17077	25126		17362	27484	16485	25126	675	27484	592	25126		63.1713	65.6093	0.0546317	2.43803		2.45597	2.35613	-0.0598793	-0.0998492		2	0.0303532	5.46833	0.0829905
chr2	30031546	30048881	-	Wdr34	ENSMUSG00000039715.8	17335	134	404	151	522		17	404	19	522	117	404	132	522		4.20794	3.63987	-0.209231	-0.568079		28.9604	25.2874	-0.195665	-3.67304		1	0.0576868	2.57674	0.148644
chr2	30057378	30072577	+	Set	ENSMUSG00000054766.13	15199	6241	7305	8209	9411		6028	7305	7985	9411	213	7305	224	9411		82.5188	84.8475	0.0401492	2.3287		2.91581	2.38019	-0.292818	-0.535618		0	0	0	0
chr2	30077684	30091022	+	Pkn3	ENSMUSG00000026785.14	13338	151	235	210	326		125	235	177	326	26	235	33	326		53.1915	54.2945	0.0296099	1.10298		11.0639	10.1227	-0.128258	-0.941141		1	0.0749738	2.8982	0.217289
chr2	30090944	30093648	-	Zdhhc12	ENSMUSG00000015335.16	2704	108	224	118	242		33	224	34	242	75	224	84	242		14.7322	14.0496	-0.0684397	-0.682559		33.4822	34.7108	0.0519903	1.2286		0	0	0	0
chr2	30097283	30124585	-	Zer1	ENSMUSG00000039686.14	27302	1426	4509	1472	4390		150	4509	179	4390	1276	4509	1293	4390		3.32668	4.07745	0.293584	0.750769		28.299	29.4533	0.0576805	1.15435		0	0	0	0
chr2	30133746	30152013	+	Tbc1d13	ENSMUSG00000039678.12	18267	1404	2791	1619	3015		1246	2791	1462	3015	158	2791	157	3015		44.6435	48.4909	0.119263	3.84738		5.66106	5.2073	-0.120536	-0.453757		0	0	0	0
chr2	30171493	30174069	+	Endog	ENSMUSG00000015337.5	2576	36	81	33	77		32	81	29	77	4	81	4	77		39.5062	37.6624	-0.0689552	-1.84383		4.93839	5.19493	0.0730634	0.256539		1	0.388199	2.54349	0.98738
chr2	30173453	30178459	-	Spout1	ENSMUSG00000039660.16	5006	413	499	547	624		33	499	44	624	380	499	503	624		6.61325	7.0513	0.0925303	0.438052		76.1523	80.609	0.0820527	4.45667		0	0	0	0
chr2	30185124	30205847	-	Kyat1	ENSMUSG00000039648.14	20723	605	1602	580	1415		66	1602	67	1415	539	1602	513	1415		4.11986	4.73499	0.200767	0.615133		33.6454	36.2544	0.107746	2.60897		1	0.0482556	2.5387	0.122506
chr2	30237715	30263790	+	Lrrc8a	ENSMUSG00000007476.18	26075	74	2045	61	1778		58	2045	48	1778	16	2045	13	1778		2.83619	2.69967	-0.0711725	-0.136523		0.782401	0.731164	-0.0977127	-0.0512368		1	0.0383509	2.51749	0.096548
chr2	30240567	30282148	+	Gm28035	ENSMUSG00000099041.1	41581	80	706	13	745		72	706	8	745	8	706	5	745		10.1983	1.07384	-3.24748	-9.12447		1.13316	0.671154	-0.755633	-0.462004		4	0.0961978	10.6957	0.257226
chr2	30266203	30282149	+	Phyhd1	ENSMUSG00000079484.12	15946	91	392	74	299		60	392	44	299	31	392	30	299		15.3061	14.7157	-0.05675	-0.590396		7.90819	10.0335	0.343402	2.12529		4	0.250847	10.6957	0.670746
chr2	30281043	30301078	+	Gm28038	ENSMUSG00000098794.1	20035	173	175	230	234		170	175	225	234	3	175	5	234		97.1429	96.1538	-0.0147634	-0.989011		1.71434	2.13679	0.317793	0.422452		0	0	0	0
chr2	30286397	30344266	+	Nup188	ENSMUSG00000052533.14	57869	3887	7760	4632	8990		3669	7760	4401	8990	218	7760	231	8990		47.2809	48.9544	0.05018	1.67347		2.80928	2.56952	-0.1287	-0.239757		2	0.0345608	5.53249	0.0956037
chr2	30344809	30359337	-	Sh3glb2	ENSMUSG00000026860.16	14528	1416	2876	1442	2691		226	2876	176	2691	1190	2876	1266	2691		7.85814	6.54032	-0.264826	-1.31782		41.3769	47.0457	0.185237	5.6688		1	0.0688326	2.61428	0.179948
chr2	30364233	30385521	+	Miga2	ENSMUSG00000026858.18	21288	428	1282	471	1487		368	1282	397	1487	60	1282	74	1487		28.7052	26.6981	-0.104575	-2.0071		4.68019	4.97647	0.0885539	0.296274		0	0	0	0
chr2	30392254	30400529	+	Dolpp1	ENSMUSG00000026856.14	8275	365	981	371	1001		285	981	276	1001	80	981	95	1001		29.052	27.5724	-0.0754106	-1.47956		8.15495	9.49052	0.21881	1.33557		0	0	0	0
chr2	30400471	30415813	-	Crat	ENSMUSG00000026853.15	15342	490	949	530	1010		92	949	84	1010	398	949	446	1010		9.69442	8.31684	-0.22112	-1.37758		41.9389	44.1584	0.0743999	2.21953		1	0.0651806	2.64669	0.172513
chr2	30416039	30447806	+	Ptpa	ENSMUSG00000039515.11	31767	2559	7898	2941	8793		2272	7898	2696	8793	287	7898	245	8793		28.7668	30.6608	0.0919896	1.89398		3.63383	2.78631	-0.383137	-0.847524		1	0.0314792	2.7337	0.0860547
chr2	30595040	30608943	+	Cstad	ENSMUSG00000047363.4	13903	28	1100	38	1144		10	1100	12	1144	18	1100	26	1144		0.9091	1.04896	0.206448	0.13986		1.63637	2.27274	0.473929	0.636363		0	0	0	0
chr2	30629655	30689210	+	9330198N18Rik	ENSMUSG00000086405.1	59555	3	95	1	65		3	95	1	65	0	95	0	65		3.158	1.53861	-1.03738	-1.61938		0.000105263	0.000153846	0.547487	4.85829e-05		4	0.0671648	11.1549	0.187305
chr2	30658468	30678011	-	Gm14486	ENSMUSG00000087268.1	19543	18	77	10	43		18	77	10	43	0	77	0	43		23.3767	23.256	-0.00747019	-0.12073		0.00012987	0.000232558	0.84052	0.000102688		0	0	0	0
chr2	30794769	30803661	-	1700001O22Rik	ENSMUSG00000044320.14	8892	35	72	26	68		16	72	11	68	19	72	15	68		22.2223	16.1766	-0.458102	-6.04574		26.389	22.0589	-0.258573	-4.33005		0	0	0	0
chr2	30807826	30823033	+	Ntmt1	ENSMUSG00000026857.9	15207	317	2382	275	2313		190	2382	190	2313	127	2382	85	2313		7.97649	8.21444	0.0424081	0.23795		5.33166	3.67489	-0.536885	-1.65677		0	0	0	0
chr2	30823097	30830333	-	Asb6	ENSMUSG00000039483.10	7236	300	672	257	606		62	672	47	606	238	672	210	606		9.2262	7.75579	-0.250463	-1.47041		35.4167	34.6535	-0.0314287	-0.7632		0	0	0	0
chr2	30952959	30959015	+	Tor1b	ENSMUSG00000026848.14	6056	267	2719	299	2977		261	2719	288	2977	6	2719	11	2977		9.59912	9.67417	0.0112359	0.075051		0.220673	0.369503	0.743675	0.14883		0	0	0	0
chr2	30960627	30967933	-	Tor1a	ENSMUSG00000026849.18	7306	181	1611	210	1730		49	1611	42	1730	132	1611	168	1730		3.0416	2.42775	-0.325207	-0.613844		8.19367	9.71099	0.245108	1.51731		0	0	0	0
chr2	30972177	30982201	-	BC005624	ENSMUSG00000026851.9	10024	1352	1985	1418	2067		82	1985	79	2067	1270	1985	1339	2067		4.13099	3.82197	-0.112171	-0.309018		63.9799	64.7799	0.0179281	0.800025		0	0	0	0
chr2	30982279	31023586	+	Usp20	ENSMUSG00000026854.16	41307	689	2361	709	2229		618	2361	633	2229	71	2361	76	2229		26.1754	28.3984	0.1176	2.22304		3.0072	3.40961	0.181182	0.402401		0	0	0	0
chr2	31026206	31142008	-	Fnbp1	ENSMUSG00000075415.13	115802	4937	40983	5089	43898		549	40983	600	43898	4388	40983	4489	43898		1.33958	1.36681	0.0290267	0.027225		10.7069	10.226	-0.066299	-0.4809		5	0.0431771	13.9272	0.120268
chr2	31146457	31152291	-	D330023K18Rik	ENSMUSG00000087269.1	5834	43	555	38	612		20	555	22	612	23	555	16	612		3.60362	3.59479	-0.00354099	-0.00883398		4.14416	2.61439	-0.664603	-1.52977		0	0	0	0
chr2	31152316	31218775	+	Gpr107	ENSMUSG00000000194.13	66459	1604	8737	1632	8552		1401	8737	1439	8552	203	8737	193	8552		16.0353	16.8265	0.0694858	0.791221		2.32345	2.25678	-0.0420027	-0.0666699		1	0.0150469	2.7843	0.041895
chr2	31245823	31295989	+	Ncs1	ENSMUSG00000062661.6	50166	28	207	23	151		27	207	22	151	1	207	1	151		13.0435	14.5696	0.159627	1.52607		0.48314	0.662317	0.455082	0.179178		1	0.0199338	2.5817	0.0514631
chr2	31314415	31460738	+	Hmcn2	ENSMUSG00000055632.18	146323	54	361	43	225		34	361	18	225	20	361	25	225		9.41831	8.00004	-0.23546	-1.41827		5.54019	11.1112	1.004	5.57096		3	0.0205026	8.38308	0.0572916
chr2	31470207	31520672	+	Ass1	ENSMUSG00000076441.9	50465	797	2184	661	1879		761	2184	635	1879	36	2184	26	1879		34.8443	33.7946	-0.044132	-1.04975		1.64836	1.38372	-0.252476	-0.264636		1	0.0198157	2.56261	0.0507799
chr2	31572651	31617526	+	Fubp3	ENSMUSG00000026843.15	44875	1963	8926	2081	8275		1794	8926	1904	8275	169	8926	177	8275		20.0986	23.0091	0.195108	2.91048		1.89335	2.13897	0.175981	0.245628		2	0.0445682	5.93536	0.132264
chr2	31670715	31681349	+	Exosc2	ENSMUSG00000039356.15	10634	1071	3498	1259	4464		968	3498	1120	4464	103	3498	139	4464		27.673	25.0896	-0.141387	-2.58335		2.94454	3.1138	0.0806335	0.169259		0	0	0	0
chr2	31676364	31688469	-	Gm13427	ENSMUSG00000087549.1	12105	29	296	30	282		21	296	18	282	8	296	12	282		7.09463	6.38301	-0.152489	-0.711614		2.70274	4.25535	0.654858	1.55262		0	0	0	0
chr2	31688376	31804227	+	Abl1	ENSMUSG00000026842.16	115851	1456	16668	1766	18442		1249	16668	1534	18442	207	16668	232	18442		7.4934	8.31797	0.150611	0.824569		1.2419	1.258	0.0185798	0.0160973		4	0.0345271	11.1833	0.0965319
chr2	31813290	31846005	-	Fibcd1	ENSMUSG00000026841.7	32715	8	120	2	35		0	120	1	35	8	120	1	35		8.33333e-05	2.85742	15.0655	2.85734		6.66674	2.85742	-1.22227	-3.80932		0	0	0	0
chr2	31974436	32053975	+	Nup214	ENSMUSG00000001855.15	79539	2739	14771	2959	13182		2384	14771	2697	13182	355	14771	262	13182		16.1397	20.4597	0.34217	4.31998		2.40336	1.98756	-0.274054	-0.415799		3	0.0377173	7.95766	0.100047
chr2	32050055	32084857	-	Fam78a	ENSMUSG00000050592.8	34802	1103	14243	650	13832		336	14243	351	13832	767	14243	299	13832		2.35905	2.53759	0.105253	0.17854		5.3851	2.16165	-1.31684	-3.22345		0	0	0	0
chr2	32050086	32064911	-	Gm16534	ENSMUSG00000090157.7	14825	314	703	229	526		88	703	63	526	226	703	166	526		12.5178	11.9772	-0.0636892	-0.54059		32.1479	31.5589	-0.0266775	-0.588999		0	0	0	0
chr2	32151082	32234537	+	Prrc2b	ENSMUSG00000039262.16	83455	7370	22578	7719	22893		6543	22578	6871	22893	827	22578	848	22893		28.9795	30.0135	0.050579	1.034		3.66286	3.70419	0.0161881	0.0413314		4	0.04793	10.8226	0.129681
chr2	32232782	32236382	-	Gm13610	ENSMUSG00000086216.1	3600	159	2558	202	2629		157	2558	193	2629	2	2558	9	2629		6.13761	7.3412	0.258338	1.20359		0.07819	0.342339	2.13037	0.264149		0	0	0	0
chr2	32236590	32255005	+	Pomt1	ENSMUSG00000039254.16	18415	816	1752	993	1999		641	1752	819	1999	175	1752	174	1999		36.5868	40.9705	0.163263	4.38373		9.98859	8.70436	-0.198543	-1.28423		1	0.0543036	2.5817	0.140195
chr2	32255002	32260159	-	Uck1	ENSMUSG00000002550.16	5157	452	894	542	962		88	894	97	962	364	894	445	962		9.84341	10.0832	0.034719	0.239759		40.7159	46.2578	0.184105	5.54191		0	0	0	0
chr2	32278816	32288075	-	Swi5	ENSMUSG00000044627.11	9259	2490	3237	2734	3522		82	3237	116	3522	2408	3237	2618	3522		2.53321	3.29359	0.378691	0.760373		74.3899	74.3328	-0.00110784	-0.0571017		0	0	0	0
chr2	32287384	32307921	+	Golga2	ENSMUSG00000002546.16	20537	2066	3347	2633	3965		1921	3347	2454	3965	145	3347	179	3965		57.3947	61.8916	0.108825	4.49687		4.33224	4.5145	0.0594542	0.182264		1	0.0486926	2.53475	0.123424
chr2	32308471	32353338	-	Dnm1	ENSMUSG00000026825.17	44867	9	70	8	68		1	70	5	68	8	70	3	68		1.42871	7.35308	2.36363	5.92437		11.4287	4.41191	-1.37319	-7.01679		1	0.0222881	2.6387	0.0588116
chr2	32352327	32380970	+	Ciz1	ENSMUSG00000039205.16	28643	1029	1773	1346	2120		904	1773	1201	2120	125	1773	145	2120		50.987	56.6509	0.15197	5.66392		7.0502	6.83963	-0.0437471	-0.210576		0	0	0	0
chr2	32384633	32388252	-	Lcn2	ENSMUSG00000026822.14	3619	21	148	12	102		0	148	0	102	21	148	12	102		6.75675e-05	9.80391e-05	0.537028	3.04716e-05		14.1892	11.7648	-0.270322	-2.42445		0	0	0	0
chr2	32395896	32405772	+	Ptges2	ENSMUSG00000026820.5	9876	177	340	253	442		144	340	229	442	33	340	24	442		42.353	51.81	0.290767	9.45701		9.70591	5.42989	-0.837942	-4.27602		0	0	0	0
chr2	32414487	32451445	-	Slc25a25	ENSMUSG00000026819.15	36958	516	1317	573	1353		72	1317	85	1353	444	1317	488	1353		5.46698	6.28234	0.200559	0.815365		33.713	36.068	0.097415	2.35501		1	0.0270577	2.65623	0.0718716
chr2	32535332	32569756	+	Fam102a	ENSMUSG00000039157.12	34424	784	7583	789	10108		687	7583	652	10108	97	7583	137	10108		9.05974	6.45034	-0.490095	-2.6094		1.27918	1.35536	0.0834619	0.0761847		0	0	0	0
chr2	32570858	32573579	+	Dpm2	ENSMUSG00000026810.12	2721	58	755	76	1023		28	755	32	1023	30	755	44	1023		3.70862	3.12806	-0.245613	-0.580558		3.97352	4.30108	0.114282	0.327562		0	0	0	0
chr2	32574797	32583782	+	Pip5kl1	ENSMUSG00000046854.16	8985	24	72	23	76		17	72	17	76	7	72	6	76		23.6112	22.3685	-0.0780024	-1.24269		9.72235	7.89486	-0.300391	-1.82749		0	0	0	0
chr2	32587095	32599698	+	St6galnac4	ENSMUSG00000079442.12	12603	14	174	16	257		7	174	1	257	7	174	15	257		4.02304	0.389144	-3.36991	-3.6339		4.02304	5.83661	0.536844	1.81357		1	0.0793462	2.55407	0.202656
chr2	32599709	32620806	+	St6galnac6	ENSMUSG00000026811.18	21097	26	194	27	248		14	194	18	248	12	194	9	248		7.21654	7.2581	0.00828448	0.0415592		6.18562	3.62907	-0.769317	-2.55654		0	0	0	0
chr2	32646595	32682669	+	Eng	ENSMUSG00000026814.16	36074	214	726	156	585		195	726	145	585	19	726	11	585		26.8595	24.7863	-0.115888	-2.07318		2.61709	1.88036	-0.476957	-0.736735		1	0.0277208	2.54448	0.070535
chr2	32682609	32704145	-	Fpgs	ENSMUSG00000009566.12	21536	325	645	446	747		39	645	39	747	286	645	407	747		6.04653	5.2209	-0.211809	-0.82563		44.3411	54.4846	0.297204	10.1435		1	0.0464339	2.82162	0.131019
chr2	32705784	32713076	-	Cdk9	ENSMUSG00000009555.16	7292	1354	2241	1566	2433		112	2241	173	2433	1242	2241	1393	2433		4.99777	7.11057	0.508679	2.11279		55.4217	57.2544	0.0469364	1.83273		2	0.274273	5.24723	0.719587
chr2	32721055	32755512	+	Sh2d3c	ENSMUSG00000059013.12	34457	831	2855	948	3106		714	2855	835	3106	117	2855	113	3106		25.0088	26.8835	0.104285	1.87469		4.09808	3.63812	-0.171753	-0.459954		0	0	0	0
chr2	32757026	32775633	-	Ttc16	ENSMUSG00000039021.15	18607	39	138	70	221		17	138	27	221	22	138	43	221		12.3189	12.2172	-0.0119562	-0.10167		15.9421	19.4571	0.287452	3.51496		1	0.0537432	2.60353	0.139922
chr2	32757234	32762244	+	Tor2a	ENSMUSG00000009563.16	5010	391	1461	498	1691		371	1461	480	1691	20	1461	18	1691		25.3936	28.3856	0.160695	2.992		1.36893	1.06446	-0.362923	-0.304467		0	0	0	0
chr2	32775786	32777597	+	Ptrh1	ENSMUSG00000053746.8	1811	396	468	832	941		369	468	775	941	27	468	57	941		78.8462	82.3592	0.0628893	3.51304		5.76925	6.0574	0.0703137	0.288145		0	0	0	0
chr2	32777381	32784428	-	Cfap157	ENSMUSG00000038987.8	7047	514	1171	986	2343		370	1171	703	2343	144	1171	283	2343		31.5969	30.0043	-0.0746166	-1.59266		12.2972	12.0785	-0.0258831	-0.218654		0	0	0	0
chr2	32787602	32847245	-	Stxbp1	ENSMUSG00000026797.16	59643	70	290	175	673		14	290	26	673	56	290	149	673		4.82762	3.86331	-0.321473	-0.964306		19.3104	22.1397	0.197259	2.82931		2	0.0335329	5.14197	0.0862125
chr2	32876114	32925254	+	Fam129b	ENSMUSG00000026796.16	49140	53	287	38	261		46	287	33	261	7	287	5	261		16.0279	12.6437	-0.342166	-3.38419		2.43906	1.91575	-0.348418	-0.523312		1	0.02035	2.54909	0.051874
chr2	32925216	32961614	-	Lrsam1	ENSMUSG00000026792.16	36398	323	1236	425	1406		67	1236	65	1406	256	1236	360	1406		5.42072	4.62305	-0.229639	-0.797669		20.712	25.6046	0.305935	4.89258		2	0.0549481	5.11225	0.140454
chr2	32961559	32965345	+	Rpl12	ENSMUSG00000038900.17	3786	15290	15548	14519	14724		14971	15548	14213	14724	319	15548	306	14724		96.2889	96.5295	0.00359987	0.240564		2.05171	2.07824	0.0185346	0.0265288		0	0	0	0
chr2	32972990	32982083	-	Slc2a8	ENSMUSG00000026791.14	9093	54	168	25	95		11	168	6	95	43	168	19	95		6.54767	6.31589	-0.051997	-0.231787		25.5953	20.0001	-0.355872	-5.5952		0	0	0	0
chr2	32986224	33131654	-	Garnl3	ENSMUSG00000038860.15	145430	20	390	15	329		5	390	5	329	15	390	10	329		1.28208	1.51979	0.245386	0.23771		3.84618	3.03954	-0.339571	-0.806635		5	0.0343808	13.2425	0.0910576
chr2	33133417	33371486	-	Ralgps1	ENSMUSG00000038831.16	238069	775	8201	605	6508		117	8201	118	6508	658	8201	487	6508		1.42666	1.81315	0.345864	0.386498		8.02341	7.4831	-0.10058	-0.540314		11	0.0462051	29.3991	0.12349
chr2	33177902	33181881	+	Gm13528	ENSMUSG00000085087.1	3979	6	89	4	86		5	89	3	86	1	89	1	86		5.61808	3.48848	-0.687478	-2.1296		1.12371	1.16291	0.0494686	0.039199		0	0	0	0
chr2	33216069	33247717	+	Angptl2	ENSMUSG00000004105.8	31648	348	5207	468	6410		280	5207	386	6410	68	5207	82	6410		5.37738	6.02184	0.163302	0.644464		1.30594	1.27925	-0.0297831	-0.0266835		0	0	0	0
chr2	33406108	33431324	-	Zbtb34	ENSMUSG00000068966.10	25216	62	2423	48	2416		28	2423	20	2416	34	2423	28	2416		1.1556	0.827819	-0.481251	-0.327778		1.40322	1.15894	-0.275933	-0.244279		1	0.0396574	3.12423	0.123899
chr2	33450287	33468559	-	Zbtb43	ENSMUSG00000026788.13	18272	132	1978	129	1899		37	1978	35	1899	95	1978	94	1899		1.87058	1.84308	-0.0213676	-0.0275008		4.80284	4.94998	0.0435358	0.147143		0	0	0	0
chr2	33729953	33887946	-	Mvb12b	ENSMUSG00000038740.9	157993	1040	29040	710	15461		177	29040	96	15461	863	29040	614	15461		0.609504	0.620918	0.0267655	0.0114133		2.97176	3.97128	0.418286	0.99952		11	0.0696233	31.3855	0.198652
chr2	33805816	33813591	+	Nron	ENSMUSG00000086484.1	7775	197	1864	56	512		113	1864	28	512	84	1864	28	512		6.06224	5.46877	-0.148634	-0.593468		4.50644	5.46877	0.279227	0.962326		0	0	0	0
chr2	34171457	34373142	-	Pbx3	ENSMUSG00000038718.15	201685	15	187	13	230		4	187	1	230	11	187	12	230		2.13909	0.434826	-2.29849	-1.70426		5.8824	5.21743	-0.173066	-0.664971		2	0.00991645	5.5325	0.0274314
chr2	34406771	34624950	+	Mapkap1	ENSMUSG00000038696.14	218179	720	17410	1231	17887		595	17410	1084	17887	125	17410	147	17887		3.41758	6.06027	0.826408	2.64269		0.717979	0.821826	0.194893	0.103848		5	0.022917	13.2371	0.0606708
chr2	34674594	34755232	-	Gapvd1	ENSMUSG00000026867.18	80638	4947	18820	4580	17719		374	18820	388	17719	4573	18820	4192	17719		1.98725	2.18974	0.139988	0.202492		24.2986	23.6582	-0.0385328	-0.640398		3	0.0372033	7.91578	0.0981644
chr2	34771970	34777547	+	Hspa5	ENSMUSG00000026864.13	5577	2605	4771	2567	4611		2246	4771	2248	4611	359	4771	319	4611		47.0761	48.753	0.0504961	1.6769		7.52463	6.91824	-0.121215	-0.606389		0	0	0	0
chr2	34777556	34799912	-	Rabepk	ENSMUSG00000070953.13	22356	357	1395	409	1569		49	1395	43	1569	308	1395	366	1569		3.51255	2.74061	-0.358025	-0.771946		22.0789	23.327	0.079333	1.24811		0	0	0	0
chr2	34804514	34826311	-	Fbxw2	ENSMUSG00000035949.15	21797	974	6726	966	6540		289	6726	251	6540	685	6726	715	6540		4.29676	3.83792	-0.162924	-0.458838		10.1844	10.9327	0.102297	0.748363		1	0.0458779	2.52433	0.115811
chr2	34849734	34874968	-	Psmd5	ENSMUSG00000026869.12	25234	1041	2603	1134	2540		54	2603	52	2540	987	2603	1082	2540		2.07453	2.04725	-0.0191009	-0.0272852		37.9178	42.5984	0.167925	4.68064		1	0.0396291	2.60353	0.103175
chr2	34893757	34914026	-	Phf19	ENSMUSG00000026873.9	20269	364	1269	562	1643		46	1269	67	1643	318	1269	495	1643		3.62491	4.07791	0.169886	0.453003		25.0591	30.1278	0.265761	5.06871		2	0.0986729	5.36982	0.264928
chr2	34941750	34961772	-	Traf1	ENSMUSG00000026875.14	20022	345	1780	137	791		59	1780	21	791	286	1780	116	791		3.31461	2.65488	-0.320194	-0.659733		16.0674	14.665	-0.131762	-1.40243		1	0.0499451	2.59392	0.129553
chr2	35081861	35101543	-	AI182371	ENSMUSG00000035875.15	19682	30	98	33	167		4	98	4	167	26	98	29	167		4.08173	2.39527	-0.768994	-1.68646		26.5307	17.3653	-0.611453	-9.16537		0	0	0	0
chr2	35109492	35178822	+	Cntrl	ENSMUSG00000057110.15	69330	9683	22595	11889	28347		8956	22595	11021	28347	727	22595	868	28347		39.6371	38.8789	-0.0278638	-0.758194		3.21753	3.06205	-0.0714529	-0.155474		1	0.0144238	2.57185	0.0370958
chr2	35180205	35201120	-	Rab14	ENSMUSG00000026878.17	20915	1117	11288	1048	10767		350	11288	316	10767	767	11288	732	10767		3.10064	2.93489	-0.0792568	-0.165744		6.79483	6.79855	0.000790643	0.0037248		2	0.0956251	5.59758	0.267635
chr2	35256380	35307892	+	Gsn	ENSMUSG00000026879.14	51512	4453	8929	2684	5661		4379	8929	2635	5661	74	8929	49	5661		49.0424	46.5465	-0.0753568	-2.4959		0.828761	0.865573	0.0626992	0.0368119		1	0.019413	2.7989	0.0543349
chr2	35313986	35336976	-	Stom	ENSMUSG00000026880.11	22990	224	578	299	713		15	578	15	713	209	578	284	713		2.59517	2.1038	-0.302833	-0.491372		36.1592	39.8317	0.139555	3.67252		0	0	0	0
chr2	35400179	35463231	-	Ggta1	ENSMUSG00000035778.17	63052	975	8671	1596	13249		118	8671	174	13249	857	8671	1422	13249		1.36086	1.31331	-0.0513131	-0.0475518		9.88352	10.7329	0.118941	0.849365		0	0	0	0
chr2	35558266	35730994	+	Dab2ip	ENSMUSG00000026883.17	172728	224	2545	296	2982		193	2545	259	2982	31	2545	37	2982		7.5835	8.68545	0.195736	1.10195		1.21808	1.24078	0.0266417	0.0227028		10	0.0578945	26.6858	0.154496
chr2	35751241	35979913	-	Ttll11	ENSMUSG00000026885.13	228672	4	151	5	92		0	151	0	92	4	151	5	92		6.62251e-05	0.000108696	0.714842	4.24704e-05		2.64907	5.43489	1.03676	2.78581		4	0.0174923	11.0399	0.0482781
chr2	36036326	36049406	-	Ndufa8	ENSMUSG00000026895.7	13080	606	2534	678	2515		29	2534	16	2515	577	2534	662	2515		1.14444	0.636187	-0.847119	-0.508253		22.7703	26.3221	0.209118	3.55174		0	0	0	0
chr2	36116079	36136773	-	Rbm18	ENSMUSG00000026889.12	20694	382	3188	350	2993		38	3188	45	2993	344	3188	305	2993		1.19197	1.50351	0.334984	0.311538		10.7905	10.1904	-0.0825399	-0.60002		0	0	0	0
chr2	36136389	36190647	+	Mrrf	ENSMUSG00000026887.9	54258	225	2331	242	2481		184	2331	190	2481	41	2331	52	2481		7.89361	7.65821	-0.0436791	-0.235406		1.75891	2.09593	0.252914	0.337027		0	0	0	0
chr2	36230426	36252272	+	Ptgs1	ENSMUSG00000047250.13	21846	37	166	37	139		30	166	33	139	7	166	4	139		18.0723	23.7411	0.393601	5.66872		4.21693	2.87777	-0.551241	-1.33916		0	0	0	0
chr2	37350074	37359332	-	Pdcl	ENSMUSG00000009030.14	9258	563	1222	540	1141		63	1222	68	1141	500	1222	472	1141		5.15549	5.95969	0.209128	0.804202		40.9165	41.3672	0.0158043	0.450692		0	0	0	0
chr2	37370069	37422903	-	Rc3h2	ENSMUSG00000075376.10	52834	2537	9557	2270	9539		256	9557	271	9539	2281	9557	1999	9539		2.67867	2.84097	0.0848688	0.162304		23.8673	20.9561	-0.187668	-2.91125		1	0.0189272	2.60353	0.0492775
chr2	37425500	37443171	-	Zbtb6	ENSMUSG00000066798.3	17671	258	420	238	409		3	420	7	409	255	420	231	409		0.714309	1.71152	1.26065	0.997206		60.7143	56.4792	-0.104316	-4.23507		0	0	0	0
chr2	37432168	37443135	-	Zbtb26	ENSMUSG00000050714.9	10967	7	359	14	380		4	359	7	380	3	359	7	380		1.11423	1.84213	0.725324	0.727897		0.835682	1.84213	1.14035	1.00645		0	0	0	0
chr2	37443279	37566454	+	Rabgap1	ENSMUSG00000035437.15	123175	3010	14664	2774	13819		2748	14664	2555	13819	262	14664	219	13819		18.7398	18.489	-0.0194332	-0.250734		1.78669	1.58478	-0.17301	-0.201914		2	0.0162371	5.46741	0.0443873
chr2	37483228	37703859	-	Strbp	ENSMUSG00000026915.16	220631	5059	17282	4649	14107		335	17282	273	14107	4724	17282	4376	14107		1.93843	1.93521	-0.00240108	-0.00322345		27.3348	31.0201	0.182463	3.68526		2	0.00906491	5.68279	0.025757
chr2	37516332	37520603	+	Gpr21	ENSMUSG00000053164.6	4271	20	53	26	64		8	53	15	64	12	53	11	64		15.0945	23.4376	0.634803	8.34312		22.6417	17.1876	-0.397609	-5.45403		0	0	0	0
chr2	37798991	38287390	-	Dennd1a	ENSMUSG00000035392.17	488399	1201	35611	1110	43426		135	35611	186	43426	1066	35611	924	43426		0.379097	0.428315	0.176107	0.0492184		2.99346	2.12776	-0.492479	-0.8657		6	0.012285	16.3883	0.0335551
chr2	38511643	38594606	+	Nek6	ENSMUSG00000026749.11	82963	83	699	47	500		66	699	38	500	17	699	9	500		9.44207	7.60002	-0.313101	-1.84205		2.43206	1.80002	-0.434166	-0.63204		3	0.0361607	8.07832	0.0973726
chr2	38588036	38644087	-	Psmb7	ENSMUSG00000026750.6	56051	3340	8234	3628	8619		50	8234	60	8619	3290	8234	3568	8619		0.607239	0.696138	0.197107	0.0888981		39.9563	41.3969	0.051101	1.44063		2	0.0356818	5.27214	0.0940597
chr2	38723370	38927688	-	Nr6a1	ENSMUSG00000063972.13	204318	62	3262	77	2392		24	3262	26	2392	38	3262	51	2392		0.735748	1.08696	0.563016	0.351213		1.16493	2.13211	0.872036	0.967179		2	0.00978866	5.33723	0.0261222
chr2	38823257	38852370	+	Nr6a1os	ENSMUSG00000085201.1	29113	46	2722	38	2172		36	2722	31	2172	10	2722	7	2172		1.32256	1.42726	0.109915	0.1047		0.367381	0.322288	-0.188924	-0.0450924		0	0	0	0
chr2	38997476	39006168	+	Wdr38	ENSMUSG00000035295.10	8692	81	124	60	90		37	124	21	90	44	124	39	90		29.8388	23.3334	-0.35479	-6.50535		35.4839	43.3334	0.288314	7.84947		1	0.115048	2.72102	0.313049
chr2	39001580	39005624	-	Rpl35	ENSMUSG00000062997.6	4044	44	153	37	148		8	153	10	148	36	153	27	148		5.22882	6.75682	0.369859	1.528		23.5295	18.2433	-0.367102	-5.28616		0	0	0	0
chr2	39005348	39015877	+	Arpc5l	ENSMUSG00000026755.14	10529	782	2831	727	2455		692	2831	649	2455	90	2831	78	2455		24.4437	26.4358	0.113035	1.99219		3.17909	3.17719	-0.000861914	-0.00189873		0	0	0	0
chr2	39016155	39065541	-	Golga1	ENSMUSG00000026754.16	49386	1515	5513	1631	5989		190	5513	227	5989	1325	5513	1404	5989		3.4464	3.79028	0.137215	0.343883		24.0341	23.443	-0.035927	-0.591123		2	0.0404973	5.20706	0.105436
chr2	39066214	39190734	-	Scai	ENSMUSG00000035236.17	124520	1643	10425	1751	10560		324	10425	297	10560	1319	10425	1454	10560		3.10791	2.8125	-0.144093	-0.295414		12.6523	13.7689	0.12202	1.11666		0	0	0	0
chr2	39194354	39226451	-	Ppp6c	ENSMUSG00000026753.5	32097	1849	4064	1778	4073		103	4064	103	4073	1746	4064	1675	4073		2.53445	2.52885	-0.00319141	-0.00560031		42.9626	41.1245	-0.0630839	-1.83812		0	0	0	0
chr2	40595246	42653624	-	Lrp1b	ENSMUSG00000049252.17	2058378	8	204	4	115		0	204	1	115	8	204	3	115		4.90196e-05	0.869651	14.1148	0.869602		3.92162	2.60878	-0.588073	-1.31284		1	0.000485819	2.7337	0.00132808
chr2	43555329	43682715	+	Kynu	ENSMUSG00000026866.16	127386	123	1435	115	1003		106	1435	106	1003	17	1435	9	1003		7.38677	10.5683	0.516729	3.18154		1.18468	0.897318	-0.400801	-0.287358		0	0	0	0
chr2	43748824	44395953	+	Arhgap15	ENSMUSG00000049744.15	647129	4951	126482	9519	201058		4493	126482	8878	201058	458	126482	641	201058		3.55228	4.41564	0.313876	0.863357		0.362107	0.318814	-0.183703	-0.0432934		4	0.00618115	10.8046	0.0166963
chr2	44059238	44065324	-	Arhgap15os	ENSMUSG00000085089.1	6086	54	428	77	676		37	428	51	676	17	428	26	676		8.64488	7.54439	-0.196441	-1.10049		3.97199	3.84617	-0.0464384	-0.125817		0	0	0	0
chr2	44564412	44927657	-	Gtdc1	ENSMUSG00000036890.13	363245	387	45211	458	49556		82	45211	98	49556	305	45211	360	49556		0.181372	0.197756	0.124772	0.0163843		0.674615	0.726451	0.106802	0.0518363		0	0	0	0
chr2	44983632	45117395	-	Zeb2	ENSMUSG00000026872.17	133763	82	3939	111	3926		17	3939	21	3926	65	3939	90	3926		0.431584	0.534898	0.309622	0.103314		1.65017	2.29241	0.474254	0.642245		1	0.00747591	2.66861	0.0199503
chr2	48814109	48903269	+	Acvr2a	ENSMUSG00000052155.5	89160	191	2388	235	3491		130	2388	161	3491	61	2388	74	3491		5.44389	4.61186	-0.239289	-0.832028		2.55444	2.11974	-0.269122	-0.434704		0	0	0	0
chr2	48902824	48950277	-	Orc4	ENSMUSG00000026761.12	47453	2423	13181	2067	13360		288	13181	296	13360	2135	13181	1771	13360		2.18496	2.21557	0.0200682	0.0306056		16.1976	13.256	-0.289132	-2.94157		1	0.0210735	2.60353	0.0548654
chr2	48949508	49325405	+	Mbd5	ENSMUSG00000036792.12	375897	877	45890	1003	48578		649	45890	768	48578	228	45890	235	48578		1.41425	1.58096	0.160765	0.166711		0.49684	0.483758	-0.0384964	-0.0130822		2	0.00532061	5.29226	0.014079
chr2	49451486	49551948	+	Epc2	ENSMUSG00000069495.12	100462	2818	27030	2726	28618		2570	27030	2515	28618	248	27030	211	28618		9.50795	8.78818	-0.113571	-0.719779		0.917499	0.737299	-0.315458	-0.180201		0	0	0	0
chr2	49619298	49774778	+	Kif5c	ENSMUSG00000026764.15	155480	56	444	87	755		48	444	74	755	8	444	13	755		10.8108	9.80134	-0.141427	-1.00949		1.80182	1.72187	-0.0654841	-0.0799566		2	0.0128634	5.19035	0.0333828
chr2	49787688	49948849	+	Lypd6b	ENSMUSG00000026765.12	161161	652	15602	351	9612		547	15602	289	9612	105	15602	62	9612		3.50596	3.00666	-0.221649	-0.499302		0.672991	0.645028	-0.0612258	-0.0279632		2	0.01241	5.57575	0.0345974
chr2	50279881	50296801	-	Mmadhc	ENSMUSG00000026766.16	16920	1404	6453	1708	6603		138	6453	151	6603	1266	6453	1557	6603		2.13854	2.28684	0.0967286	0.148299		19.6188	23.5802	0.26534	3.96141		2	0.118203	5.23488	0.30939
chr2	50296810	50433967	+	Gm13483	ENSMUSG00000085862.2	137157	5	1134	3	1712		3	1134	2	1712	2	1134	1	1712		0.264559	0.116828	-1.1792	-0.147731		0.176376	0.0584171	-1.59419	-0.117959		0	0	0	0
chr2	50380400	50412610	+	Gm48908	ENSMUSG00000115545.1	32210	5	154	4	250		5	154	4	250	0	154	0	250		3.24682	1.60004	-1.02092	-1.64678		6.4935e-05	4e-05	-0.698997	-2.4935e-05		0	0	0	0
chr2	51130438	51149111	-	Rnd3	ENSMUSG00000017144.8	18673	13	207	13	149		5	207	3	149	8	207	10	149		2.41551	2.01349	-0.262628	-0.402017		3.86478	6.71147	0.796243	2.84669		1	0.0535533	2.5817	0.138258
chr2	51924448	51935163	-	Rbm43	ENSMUSG00000036249.16	10715	299	911	484	1230		53	911	94	1230	246	911	390	1230		5.81779	7.64228	0.393532	1.82449		27.0033	31.7073	0.23168	4.70402		0	0	0	0
chr2	51948487	51973494	-	Nmi	ENSMUSG00000026946.9	25007	1110	3234	1735	4238		58	3234	106	4238	1052	3234	1629	4238		1.79345	2.50118	0.479874	0.707734		32.5294	38.4379	0.240788	5.90857		1	0.0399888	2.53844	0.101509
chr2	52072832	52122383	+	Rif1	ENSMUSG00000036202.16	49551	6162	13513	6999	14843		5609	13513	6420	14843	553	13513	579	14843		41.5082	43.2527	0.059395	1.74453		4.09236	3.90083	-0.0691509	-0.191527		1	0.0201812	2.60353	0.0525424
chr2	52136647	52378474	-	Neb	ENSMUSG00000026950.17	241827	649	2671	799	2703		170	2671	151	2703	479	2671	648	2703		6.36466	5.58639	-0.188168	-0.778272		17.9334	23.9734	0.418787	6.04		0	0	0	0
chr2	52397951	52424901	-	Arl5a	ENSMUSG00000036093.7	26950	487	4073	760	4987		45	4073	48	4987	442	4073	712	4987		1.10484	0.962504	-0.198971	-0.142335		10.852	14.2771	0.39575	3.42517		1	0.0371058	2.66861	0.0990208
chr2	52691664	52742281	-	Stam2	ENSMUSG00000055371.17	50617	903	7015	1169	7552		121	7015	164	7552	782	7015	1005	7552		1.72488	2.17161	0.332273	0.446735		11.1475	13.3077	0.255539	2.16019		2	0.0395124	5.53249	0.109301
chr2	52857860	53133804	+	Fmnl2	ENSMUSG00000036053.17	275944	1255	6715	541	2896		1121	6715	480	2896	134	6715	61	2896		16.694	16.5746	-0.010354	-0.119381		1.99553	2.10636	0.0779752	0.110823		2	0.00724785	5.4729	0.0198334
chr2	53134704	53191284	-	Prpf40a	ENSMUSG00000061136.14	56580	10387	29433	11112	29119		808	29433	819	29119	9579	29433	10293	29119		2.74522	2.8126	0.0349819	0.0673786		32.5451	35.3481	0.11919	2.80295		0	0	0	0
chr2	53191726	53219220	+	Arl6ip6	ENSMUSG00000026960.6	27494	792	5226	636	5549		717	5226	532	5549	75	5226	104	5549		13.7199	9.58731	-0.517067	-4.13255		1.43513	1.87421	0.3851	0.439079		1	0.0363716	2.63907	0.0959871
chr2	55435970	55598145	+	Kcnj3	ENSMUSG00000026824.11	162175	0	117	0	11		0	117	0	11	0	117	0	11		8.547e-05	0.000909083	3.41092	0.000823613		8.547e-05	0.000909083	3.41092	0.000823613		0	0	0	0
chr2	57106830	57124003	-	Nr4a2	ENSMUSG00000026826.13	17173	45	188	54	232		6	188	10	232	39	188	44	232		3.19154	4.31039	0.433564	1.11885		20.7447	18.9656	-0.129363	-1.77917		0	0	0	0
chr2	57237635	57370719	+	Gpd2	ENSMUSG00000026827.12	133084	839	6655	1390	9630		782	6655	1274	9630	57	6655	116	9630		11.7506	13.2295	0.171028	1.47893		0.8565	1.20457	0.491993	0.34807		1	0.00751405	2.54641	0.0191339
chr2	58129137	58195532	-	Cytip	ENSMUSG00000026832.12	66395	4604	22481	4100	20979		476	22481	437	20979	4128	22481	3663	20979		2.11734	2.08304	-0.023568	-0.0343081		18.3622	17.4603	-0.072657	-0.901855		1	0.0150614	2.60353	0.0392127
chr2	58164001	58177063	+	Gm13546	ENSMUSG00000086862.1	13062	12	97	2	51		10	97	2	51	2	97	0	51		10.3094	3.92176	-1.39438	-6.38761		2.06196	0.000196078	-13.3603	-2.06176		0	0	0	0
chr2	58267453	58357895	-	Acvr1c	ENSMUSG00000026834.13	90442	5	72	1	12		2	72	0	12	3	72	1	12		2.77791	0.000833326	-11.7028	-2.77708		4.1668	8.3341	1.00009	4.1673		1	0.0110568	2.66861	0.0295063
chr2	58388644	58567157	-	Acvr1	ENSMUSG00000026836.15	178513	15	581	11	474		2	581	4	474	13	581	7	474		0.344251	0.843903	1.29361	0.499652		2.23754	1.47681	-0.599424	-0.760724		0	0	0	0
chr2	58567298	58792971	+	Upp2	ENSMUSG00000026839.17	225673	1	111	0	97		1	111	0	97	0	111	0	97		0.90099	0.000103093	-13.0934	-0.900887		9.009e-05	0.000103093	0.194503	1.30027e-05		0	0	0	0
chr2	58821070	59160683	-	Ccdc148	ENSMUSG00000036641.9	339613	8	170	10	96		5	170	1	96	3	170	9	96		2.94123	1.04177	-1.49738	-1.89946		1.76476	9.37509	2.40936	7.61033		1	0.00294453	2.99405	0.00881606
chr2	59160850	59355208	+	Pkp4	ENSMUSG00000026991.20	194358	890	9256	1114	12433		790	9256	961	12433	100	9256	153	12433		8.53501	7.72943	-0.14303	-0.805575		1.08038	1.2306	0.187817	0.150215		2	0.0102903	5.72005	0.0294305
chr2	59484653	59505020	+	Dapl1	ENSMUSG00000026989.5	20367	20	80	4	43		18	80	4	43	2	80	0	43		22.5001	9.30254	-1.27424	-13.1976		2.50012	0.000232558	-13.3921	-2.49989		0	0	0	0
chr2	59612042	59846149	+	Tanc1	ENSMUSG00000035168.16	234107	616	8832	732	10937		542	8832	630	10937	74	8832	102	10937		6.13678	5.76026	-0.091346	-0.376512		0.837863	0.932615	0.154566	0.0947515		2	0.0085431	5.90458	0.0252217
chr2	59852364	59882591	-	Wdsub1	ENSMUSG00000026988.15	30227	161	795	290	1178		19	795	31	1178	142	795	259	1178		2.38995	2.63159	0.138953	0.241638		17.8616	21.9864	0.299748	4.12478		0	0	0	0
chr2	59899363	60209839	-	Baz2b	ENSMUSG00000026987.16	310476	3979	20706	4025	20201		556	20706	665	20201	3423	20706	3360	20201		2.68521	3.29192	0.293892	0.606704		16.5314	16.6328	0.00882211	0.1014		1	0.00322086	2.92897	0.0094338
chr2	60037141	60038837	+	Gm13572	ENSMUSG00000085975.1	1696	45	236	37	177		35	236	32	177	10	236	5	177		14.8305	18.0791	0.285755	3.2486		4.23733	2.82491	-0.584948	-1.41242		0	0	0	0
chr2	60209887	60250676	+	March7	ENSMUSG00000026977.17	40789	2488	21743	2300	21628		2201	21743	2023	21628	287	21743	277	21628		10.1228	9.35362	-0.114012	-0.769182		1.31997	1.28075	-0.043514	-0.0392179		1	0.0245164	2.66861	0.0654247
chr2	60251993	60284488	-	Cd302	ENSMUSG00000060703.12	32495	91	1358	110	1328		30	1358	34	1328	61	1358	76	1328		2.20914	2.56025	0.2128	0.35111		4.49191	5.7229	0.349418	1.23099		1	0.030774	2.53844	0.0781179
chr2	60292103	60383303	-	Ly75	ENSMUSG00000026980.15	91200	1465	4536	1581	4897		111	4536	124	4897	1354	4536	1457	4897		2.44709	2.53216	0.0493028	0.0850724		29.8501	29.7529	-0.00470442	-0.0971784		1	0.0109649	2.7337	0.0299748
chr2	60338188	60371234	+	Gm13571	ENSMUSG00000086196.7	33046	26	109	28	135		17	109	16	135	9	109	12	135		15.5964	11.8519	-0.396093	-3.74449		8.25696	8.88896	0.106402	0.631991		0	0	0	0
chr2	60417543	60553308	-	Pla2r1	ENSMUSG00000054580.14	135765	4	60	18	90		0	60	1	90	4	60	17	90		0.000166666	1.11122	12.7029	1.11105		6.66682	18.889	1.50247	12.2222		0	0	0	0
chr2	60750193	60963192	-	Rbms1	ENSMUSG00000026970.16	212999	1402	19273	1310	18828		171	19273	166	18828	1231	19273	1144	18828		0.887252	0.881666	-0.00911166	-0.00558598		6.38717	6.07606	-0.0720423	-0.311117		1	0.00469486	2.63907	0.0123901
chr2	61578585	61654171	+	Tank	ENSMUSG00000064289.15	75586	934	11884	732	11284		719	11884	530	11284	215	11884	202	11284		6.05015	4.69692	-0.365257	-1.35324		1.80916	1.79015	-0.0152394	-0.0190098		0	0	0	0
chr2	61711694	61800376	+	Psmd14	ENSMUSG00000026914.15	88682	3053	22609	4068	23755		2764	22609	3777	23755	289	22609	291	23755		12.2252	15.8998	0.379149	3.67459		1.27825	1.22501	-0.0613844	-0.0532468		1	0.0112762	2.66861	0.0300919
chr2	62046462	62326730	+	Slc4a10	ENSMUSG00000026904.17	280268	7	199	8	251		6	199	7	251	1	199	1	251		3.01512	2.78888	-0.11253	-0.226241		0.502563	0.398446	-0.334919	-0.104117		1	0.00356801	2.66861	0.00952164
chr2	62330073	62412231	-	Dpp4	ENSMUSG00000035000.8	82158	6530	22323	10489	38370		500	22323	914	38370	6030	22323	9575	38370		2.23984	2.38207	0.0888181	0.142227		27.0125	24.9544	-0.114333	-2.05811		0	0	0	0
chr2	62436880	62441142	-	Gm13565	ENSMUSG00000087681.1	4262	11	64	8	42		1	64	2	42	10	64	6	42		1.56265	4.76213	1.60761	3.19948		15.6251	14.2859	-0.129275	-1.33921		0	0	0	0
chr2	62500943	62574075	-	Fap	ENSMUSG00000000392.17	73132	34	360	41	393		5	360	6	393	29	360	35	393		1.38892	1.52674	0.136497	0.137826		8.05558	8.90588	0.144769	0.850295		0	0	0	0
chr2	62595798	62646255	-	Ifih1	ENSMUSG00000026896.14	50457	638	2621	891	3511		53	2621	65	3511	585	2621	826	3511		2.02213	1.85133	-0.127318	-0.170805		22.3197	23.5261	0.0759405	1.20633		2	0.0396377	5.98811	0.118677
chr2	62664285	62694109	+	Gca	ENSMUSG00000026893.4	29824	16	113	14	67		15	113	13	67	1	113	1	67		13.2744	19.4031	0.547639	6.12869		0.885043	1.49268	0.754089	0.607641		0	0	0	0
chr2	62693414	63184287	-	Kcnh7	ENSMUSG00000059742.10	490873	1	65	0	21		0	65	0	21	1	65	0	21		0.000153846	0.000476188	1.63005	0.000322342		1.53861	0.000476188	-11.6578	-1.53814		0	0	0	0
chr2	65088339	65239403	-	Cobll1	ENSMUSG00000034903.18	151064	43	1589	53	1504		6	1589	12	1504	37	1589	41	1504		0.377602	0.797879	1.0793	0.420277		2.32851	2.72607	0.227413	0.397556		0	0	0	0
chr2	65316430	65364034	-	Slc38a11	ENSMUSG00000061171.15	47604	3	62	3	86		0	62	0	86	3	62	3	86		0.00016129	0.000116279	-0.472068	-4.50111e-05		4.83886	3.48848	-0.472068	-1.35038		1	0.0210066	2.69644	0.0566431
chr2	65457118	65567627	-	Scn3a	ENSMUSG00000057182.14	110509	5	62	7	58		0	62	1	58	5	62	6	58		0.00016129	1.72431	13.3841	1.72415		8.06466	10.345	0.359245	2.28032		0	0	0	0
chr2	66082766	66124994	-	Galnt3	ENSMUSG00000026994.9	42228	23	211	38	443		5	211	4	443	18	211	34	443		2.36971	0.902957	-1.39198	-1.46676		8.53085	7.67496	-0.152529	-0.855885		0	0	0	0
chr2	66184327	66256617	-	Ttc21b	ENSMUSG00000034848.17	72290	854	2865	1184	3694		85	2865	116	3694	769	2865	1068	3694		2.96684	3.14023	0.0819409	0.173385		26.8412	28.9118	0.107207	2.07056		0	0	0	0
chr2	66270778	66440840	-	Scn1a	ENSMUSG00000064329.13	170062	9	61	1	29		1	61	0	29	8	61	1	29		1.63951	0.000344826	-12.2151	-1.63916		13.1149	3.44861	-1.92712	-9.66629		1	0.00588021	2.7337	0.0160747
chr2	66673425	66784914	-	Scn7a	ENSMUSG00000034810.7	111489	6	54	2	32		1	54	0	32	5	54	2	32		1.85203	0.000312499	-12.533	-1.85172		9.25943	6.25029	-0.566999	-3.00913		0	0	0	0
chr2	68210445	68472268	-	Stk39	ENSMUSG00000027030.15	261823	506	10338	475	9427		39	10338	43	9427	467	10338	432	9427		0.37725	0.456138	0.273949	0.0788877		4.51732	4.58258	0.0206953	0.0652673		3	0.0114581	8.14841	0.0311218
chr2	68861441	69114282	+	Cers6	ENSMUSG00000027035.10	252841	893	15704	2128	34948		770	15704	1824	34948	123	15704	304	34948		4.90321	5.21918	0.0900975	0.315973		0.783241	0.869864	0.151334	0.0866235		5	0.0197753	13.0827	0.0517429
chr2	69135800	69189330	+	Nostrin	ENSMUSG00000034738.8	53530	99	900	114	1155		67	900	79	1155	32	900	35	1155		7.44445	6.83983	-0.122205	-0.60462		3.55557	3.03031	-0.230613	-0.525255		0	0	0	0
chr2	69193895	69206194	-	Spc25	ENSMUSG00000005233.16	12299	1279	2877	1769	4384		107	2877	153	4384	1172	2877	1616	4384		3.71916	3.48997	-0.0917621	-0.22919		40.7369	36.8613	-0.144228	-3.87557		0	0	0	0
chr2	69647171	69667571	+	Bbs5	ENSMUSG00000063145.10	20400	43	166	71	224		40	166	65	224	3	166	6	224		24.0964	29.0179	0.268123	4.92146		1.80729	2.67861	0.567661	0.871327		2	0.0980392	5.05999	0.248039
chr2	69686815	69713516	-	Fastkd1	ENSMUSG00000027086.16	26701	302	799	300	687		24	799	20	687	278	799	280	687		3.00377	2.91122	-0.0451478	-0.0925445		34.7935	40.7569	0.228227	5.96342		0	0	0	0
chr2	69722545	69754012	+	Ppig	ENSMUSG00000042133.16	31467	1869	6139	2018	5984		1558	6139	1667	5984	311	6139	351	5984		25.3787	27.8576	0.134452	2.47889		5.06597	5.86564	0.21145	0.79967		0	0	0	0
chr2	69758033	69789575	-	Ccdc173	ENSMUSG00000070883.3	31542	104	756	94	698		23	756	19	698	81	756	75	698		3.04234	2.72208	-0.160474	-0.320264		10.7143	10.745	0.00412801	0.0307009		0	0	0	0
chr2	69789623	69800005	+	Phospho2	ENSMUSG00000027088.10	10382	262	895	299	903		222	895	269	903	40	895	30	903		24.8045	29.7896	0.264208	4.98512		4.46928	3.32227	-0.427875	-1.14701		0	0	0	0
chr2	69821944	69836651	+	Klhl23	ENSMUSG00000042155.3	14707	104	377	163	536		89	377	136	536	15	377	27	536		23.6074	25.3731	0.10406	1.7657		3.97881	5.03733	0.340324	1.05853		0	0	0	0
chr2	69861562	69871846	+	Ssb	ENSMUSG00000068882.13	10284	8270	12088	9478	13378		7973	12088	9151	13378	297	12088	327	13378		65.958	68.4033	0.0525199	2.44537		2.45698	2.44431	-0.00745922	-0.0126707		0	0	0	0
chr2	69871198	69885615	-	Mettl5	ENSMUSG00000051730.15	14417	310	1327	303	1469		48	1327	33	1469	262	1327	270	1469		3.61719	2.24643	-0.687233	-1.37076		19.7438	18.3799	-0.103273	-1.36393		0	0	0	0
chr2	69897246	70024013	+	Ubr3	ENSMUSG00000044308.17	126767	4543	20652	5069	21309		4142	20652	4628	21309	401	20652	441	21309		20.0562	21.7185	0.11488	1.66235		1.9417	2.06955	0.091995	0.127848		0	0	0	0
chr2	70039126	70429198	+	Myo3b	ENSMUSG00000042064.13	390072	66	629	146	1838		60	629	124	1838	6	629	22	1838		9.53897	6.74647	-0.4997	-2.7925		0.953911	1.19696	0.327447	0.243048		4	0.0102545	10.4368	0.0267561
chr2	70661576	70712636	+	Gorasp2	ENSMUSG00000014959.12	51060	1596	8849	1611	7925		1396	8849	1427	7925	200	8849	184	7925		15.7758	18.0063	0.19079	2.23052		2.26014	2.32177	0.0388093	0.0616243		4	0.0783392	10.9518	0.214488
chr2	70712407	70825728	-	Tlk1	ENSMUSG00000041997.16	113321	6733	57297	6949	60473		538	57297	575	60473	6195	57297	6374	60473		0.938967	0.950838	0.0181242	0.0118704		10.8121	10.5402	-0.0367368	-0.271843		1	0.00882449	2.66861	0.0235491
chr2	70964561	71055583	-	Mettl8	ENSMUSG00000041975.17	91022	459	9285	748	11253		110	9285	122	11253	349	9285	626	11253		1.18471	1.08416	-0.127958	-0.100551		3.75875	5.56296	0.5656	1.80421		3	0.0329591	8.70002	0.0955815
chr2	71055328	71099142	+	Dcaf17	ENSMUSG00000041966.18	43814	1695	6013	3029	9963		1556	6013	2781	9963	139	6013	248	9963		25.8773	27.9133	0.109266	2.03601		2.31166	2.48921	0.10676	0.177551		2	0.0456475	5.60665	0.127965
chr2	71117923	71142926	+	Cybrd1	ENSMUSG00000027015.4	25003	11	169	19	367		8	169	16	367	3	169	3	367		4.73378	4.3597	-0.118765	-0.374085		1.77521	0.817466	-1.11876	-0.95774		1	0.0399952	2.99405	0.119748
chr2	71211706	71263303	+	Dync1i2	ENSMUSG00000027012.15	51597	4257	16376	4038	15080		3989	16376	3792	15080	268	16376	246	15080		24.3588	25.1459	0.0458784	0.787071		1.63654	1.6313	-0.00462806	-0.00524149		3	0.0581429	7.99174	0.154888
chr2	71271063	71367749	-	Slc25a12	ENSMUSG00000027010.16	96686	2372	11872	2963	13933		177	11872	204	13933	2195	11872	2759	13933		1.4909	1.46415	-0.0261232	-0.0267532		18.4889	19.8019	0.0989816	1.31303		1	0.0103428	2.85023	0.0294792
chr2	71388958	71441622	+	Hat1	ENSMUSG00000027018.11	52664	2087	6584	2218	7740		1990	6584	2137	7740	97	6584	81	7740		30.2248	27.6098	-0.130551	-2.61497		1.47327	1.04651	-0.493432	-0.426757		0	0	0	0
chr2	71453276	71525194	+	Metap1d	ENSMUSG00000041921.16	71918	559	784	488	767		426	784	367	767	133	784	121	767		54.3367	47.8488	-0.183446	-6.48797		16.9643	15.7758	-0.104792	-1.18854		3	0.0417142	8.187	0.113838
chr2	71745616	71858416	+	Itga6	ENSMUSG00000027111.15	112800	3177	11727	2008	6672		2999	11727	1923	6672	178	11727	85	6672		25.5735	28.8219	0.17252	3.24848		1.51787	1.27398	-0.252699	-0.243883		3	0.0265957	8.13602	0.0721278
chr2	71873224	71903858	+	Pdk1	ENSMUSG00000006494.11	30634	3207	12893	2215	7502		2873	12893	2050	7502	334	12893	165	7502		22.2834	27.326	0.294307	5.04264		2.59055	2.19941	-0.236141	-0.391139		1	0.0326435	2.69644	0.0880212
chr2	71981240	72257474	+	Rapgef4	ENSMUSG00000049044.16	276234	567	4917	116	957		498	4917	101	957	69	4917	15	957		10.1281	10.5538	0.0593981	0.425695		1.4033	1.56741	0.159561	0.164112		7	0.0253408	18.2376	0.0660223
chr2	72285637	72442610	+	Map3k20	ENSMUSG00000004085.14	156973	350	2766	209	1164		299	2766	184	1164	51	2766	25	1164		10.8098	15.8076	0.548271	4.99773		1.84382	2.14777	0.220144	0.303953		1	0.00637052	2.53844	0.0161712
chr2	72476159	72486893	+	Cdca7	ENSMUSG00000055612.15	10734	5241	11579	6071	9586		4691	11579	5649	9586	550	11579	422	9586		40.513	58.9297	0.54061	18.4167		4.74998	4.40225	-0.109679	-0.347725		1	0.0931619	2.73265	0.254579
chr2	72936427	72980446	-	Sp3	ENSMUSG00000027109.16	44019	857	6328	991	7941		84	6328	98	7941	773	6328	893	7941		1.32744	1.2341	-0.105179	-0.0933324		12.2156	11.2454	-0.119379	-0.970115		0	0	0	0
chr2	72979424	72988677	+	Sp3os	ENSMUSG00000063714.15	9253	12	109	13	104		4	109	5	104	8	109	8	104		3.66981	4.80778	0.389665	1.13797		7.33953	7.6924	0.0677445	0.352862		0	0	0	0
chr2	73092801	73218924	-	Ola1	ENSMUSG00000027108.15	126123	2053	4818	2126	5051		56	4818	40	5051	1997	4818	2086	5051		1.16231	0.791924	-0.55356	-0.370386		41.4487	41.2988	-0.00522982	-0.149981		3	0.0237863	8.21053	0.0650994
chr2	73283105	73312701	-	Cir1	ENSMUSG00000041777.12	29596	870	5800	933	5466		158	5800	160	5466	712	5800	773	5466		2.72414	2.92719	0.103715	0.203048		12.2759	14.142	0.204159	1.86611		2	0.0675767	5.1905	0.175378
chr2	73312601	73337818	+	Scrn3	ENSMUSG00000008226.14	25217	87	319	114	395		79	319	104	395	8	319	10	395		24.7649	26.3291	0.0883624	1.56422		2.50787	2.53167	0.0136283	0.0238027		1	0.0396558	2.60725	0.103393
chr2	73341506	73386572	-	Gpr155	ENSMUSG00000041762.16	45066	88	411	72	380		14	411	17	380	74	411	55	380		3.40635	4.47371	0.393245	1.06736		18.0049	14.4737	-0.314954	-3.53118		0	0	0	0
chr2	73386970	73420498	+	D230022J07Rik	ENSMUSG00000087176.1	33528	1	61	1	53		0	61	0	53	1	61	1	53		0.000163934	0.000188679	0.202817	2.47447e-05		1.63951	1.88698	0.202817	0.247472		1	0.0298258	2.60353	0.0776524
chr2	73421909	73429142	+	Gm13707	ENSMUSG00000085768.1	7233	7	61	4	39		2	61	2	39	5	61	2	39		3.27885	5.12845	0.645334	1.8496		8.19687	5.12845	-0.676551	-3.06842		0	0	0	0
chr2	73429610	73529734	-	Wipf1	ENSMUSG00000075284.10	100124	965	5807	881	6097		103	5807	128	6097	862	5807	753	6097		1.77372	2.09939	0.243193	0.325672		14.8442	12.3503	-0.265344	-2.49382		2	0.0199752	5.32268	0.0531609
chr2	73459705	73477602	+	Gm13708	ENSMUSG00000086069.1	17897	81	6455	72	5551		65	6455	60	5551	16	6455	12	5551		1.00697	1.08089	0.102192	0.0739152		0.247871	0.216179	-0.197365	-0.0316924		0	0	0	0
chr2	73610660	73775346	-	Chn1	ENSMUSG00000056486.18	164686	5	63	10	71		0	63	1	71	5	63	9	71		0.00015873	1.40859	13.1154	1.40843		7.93665	12.6762	0.675517	4.73953		0	0	0	0
chr2	73816509	73892639	-	Atf2	ENSMUSG00000027104.18	76130	1669	17182	1777	17103		153	17182	179	17103	1516	17182	1598	17103		0.890467	1.0466	0.233076	0.156133		8.82319	9.34339	0.0826462	0.520203		0	0	0	0
chr2	73892996	73900850	+	Gm10822	ENSMUSG00000097377.1	7854	8	141	5	167		2	141	1	167	6	141	4	167		1.41851	0.598862	-1.24408	-0.819648		4.25539	2.39527	-0.829103	-1.86012		1	0.127324	2.92905	0.372937
chr2	73908447	73911326	-	Atp5g3	ENSMUSG00000018770.9	2879	2024	2172	2048	2156		129	2172	123	2156	1895	2172	1925	2156		5.93923	5.70501	-0.0580458	-0.234217		87.2468	89.2857	0.0333275	2.03894		0	0	0	0
chr2	74520291	74579435	-	Lnpk	ENSMUSG00000009207.15	59144	1065	7443	1210	8401		125	7443	134	8401	940	7443	1076	8401		1.67943	1.59505	-0.074372	-0.0843823		12.6293	12.808	0.0202686	0.178683		1	0.0169079	2.53844	0.0429197
chr2	74825803	74878431	+	Mtx2	ENSMUSG00000027099.9	52628	1005	4123	907	3835		942	4123	840	3835	63	4123	67	3835		22.8474	21.9035	-0.0608698	-0.943921		1.52802	1.74707	0.193277	0.219053		0	0	0	0
chr2	75138843	75317820	+	2600014E21Rik	ENSMUSG00000100303.3	178977	19	151	0	4		13	151	0	4	6	151	0	4		8.60933	0.00249994	-11.7498	-8.60683		3.97357	0.00249994	-10.6343	-3.97107		0	0	0	0
chr2	75147118	75177658	-	A330043C09Rik	ENSMUSG00000086044.1	30540	2	166	0	1		2	166	0	1	0	166	0	1		1.20488	0.009999	-6.91289	-1.19488		6.02409e-05	0.009999	7.3749	0.00993876		0	0	0	0
chr2	75659261	75669407	+	Hnrnpa3	ENSMUSG00000059005.13	10146	1169	5339	1440	5782		737	5339	910	5782	432	5339	530	5782		13.8041	15.7385	0.189203	1.93442		8.0914	9.16638	0.179962	1.07498		0	0	0	0
chr2	75675513	75704641	-	Nfe2l2	ENSMUSG00000015839.6	29128	420	3781	484	4065		75	3781	51	4065	345	3781	433	4065		1.9836	1.25461	-0.66088	-0.72899		9.12457	10.6519	0.223283	1.52734		0	0	0	0
chr2	75704770	75710024	+	E030042O20Rik	ENSMUSG00000087222.1	5254	9	293	13	344		3	293	5	344	6	293	8	344		1.02392	1.45352	0.505439	0.429592		2.04782	2.32561	0.183524	0.277795		0	0	0	0
chr2	75832177	75931350	+	Agps	ENSMUSG00000042410.16	99173	3711	21040	3251	21423		3434	21040	2986	21423	277	21040	265	21423		16.3213	13.9383	-0.227702	-2.383		1.31654	1.23699	-0.0899194	-0.0795516		1	0.0100834	2.53844	0.0255961
chr2	75989141	76338774	-	Pde11a	ENSMUSG00000075270.11	349633	204	3184	157	1892		19	3184	18	1892	185	3184	139	1892		0.596737	0.951379	0.672926	0.354643		5.8103	7.34673	0.338488	1.53642		5	0.0143007	13.3555	0.0381985
chr2	76369984	76383768	+	Rbm45	ENSMUSG00000042369.8	13784	1631	4537	1904	4110		1514	4537	1802	4110	117	4537	102	4110		33.3701	43.8443	0.393834	10.4742		2.5788	2.48175	-0.0553389	-0.0970445		2	0.145096	5.60084	0.406329
chr2	76406508	76600647	+	Osbpl6	ENSMUSG00000042359.18	194139	20	155	12	133		15	155	6	133	5	155	6	133		9.67748	4.51135	-1.10107	-5.16613		3.22587	4.51135	0.483871	1.28548		4	0.0206038	10.884	0.056063
chr2	76629898	76648015	-	Prkra	ENSMUSG00000002731.6	18117	267	927	390	1432		15	927	25	1432	252	927	365	1432		1.61813	1.74582	0.109572	0.127683		27.1845	25.4888	-0.0929176	-1.69564		0	0	0	0
chr2	76663044	76673116	-	Fkbp7	ENSMUSG00000002732.14	10072	28	307	40	350		4	307	13	350	24	307	27	350		1.30296	3.71431	1.5113	2.41135		7.81762	7.71431	-0.0191919	-0.103308		0	0	0	0
chr2	76675281	76696828	+	Plekha3	ENSMUSG00000002733.8	21547	394	3482	499	3475		340	3482	426	3475	54	3482	73	3475		9.76451	12.259	0.328222	2.49449		1.55084	2.10072	0.43784	0.549887		0	0	0	0
chr2	76703980	76982547	-	Ttn	ENSMUSG00000051747.14	278567	486	648	475	650		84	648	84	650	402	648	391	650		12.963	12.9231	-0.0044459	-0.0398861		62.037	60.1539	-0.0444728	-1.88319		3	0.0107694	7.7455	0.0278048
chr2	77009902	77170636	-	Ccdc141	ENSMUSG00000044033.16	160734	160	1532	198	1794		27	1532	28	1794	133	1532	170	1794		1.76241	1.56076	-0.175296	-0.201645		8.68147	9.47604	0.126345	0.794568		1	0.00622146	2.7337	0.0170076
chr2	77180340	77280592	-	Sestd1	ENSMUSG00000042272.17	100252	867	6147	932	7846		111	6147	105	7846	756	6147	827	7846		1.80576	1.33826	-0.432245	-0.467498		12.2987	10.5404	-0.222574	-1.75828		2	0.0199497	5.14197	0.0512904
chr2	77410634	77819639	-	Zfp385b	ENSMUSG00000027016.17	409005	0	64	0	24		0	64	0	24	0	64	0	24		0.00015625	0.000416665	1.41503	0.000260415		0.00015625	0.000416665	1.41503	0.000260415		1	0.00244496	2.53844	0.00620638
chr2	77881159	77946375	-	Cwc22	ENSMUSG00000027014.14	65216	1794	7284	2051	7657		188	7284	213	7657	1606	7284	1838	7657		2.581	2.78177	0.108072	0.200769		22.0483	24.0042	0.122617	1.95585		1	0.0153337	2.79879	0.0429157
chr2	78868124	78921293	+	Ube2e3	ENSMUSG00000027011.14	53169	1137	11834	921	11627		1056	11834	846	11627	81	11834	75	11627		8.92344	7.27617	-0.294421	-1.64727		0.684469	0.645051	-0.0855723	-0.0394182		1	0.018808	2.66861	0.0501911
chr2	78972672	79098851	+	Gm37004	ENSMUSG00000102286.1	126179	14	264	36	675		1	264	3	675	13	264	33	675		0.378826	0.444459	0.230517	0.0656336		4.92428	4.8889	-0.0104016	-0.0353755		0	0	0	0
chr2	79255426	79333123	+	Itga4	ENSMUSG00000027009.18	77697	7788	31390	9007	35612		7201	31390	8300	35612	587	31390	707	35612		22.9404	23.3068	0.0228556	0.366324		1.87002	1.98529	0.0862912	0.115264		2	0.025741	5.07688	0.065342
chr2	79330543	79456785	-	Cerkl	ENSMUSG00000075256.9	126242	416	3410	515	4076		254	3410	334	4076	162	3410	181	4076		7.44868	8.19431	0.137637	0.745627		4.75074	4.44063	-0.0973865	-0.310106		0	0	0	0
chr2	79635352	79672966	+	Itprid2	ENSMUSG00000027007.16	37614	812	2938	762	2729		708	2938	665	2729	104	2938	97	2729		24.098	24.3679	0.016067	0.269875		3.53983	3.55442	0.00593522	0.0145928		1	0.0265858	2.92897	0.0778691
chr2	80315466	80354043	+	Dnajc10	ENSMUSG00000027006.13	38577	3968	9511	4472	9261		3730	9511	4236	9261	238	9511	236	9261		39.2177	45.7402	0.221956	6.52245		2.50237	2.54832	0.0262543	0.0459553		0	0	0	0
chr2	80500512	80581380	-	Nckap1	ENSMUSG00000027002.13	80868	784	2143	764	1969		49	2143	39	1969	735	2143	725	1969		2.28652	1.98071	-0.207138	-0.305813		34.2977	36.8207	0.102405	2.52301		0	0	0	0
chr2	80617045	80632361	+	Dusp19	ENSMUSG00000027001.10	15316	98	559	131	696		71	559	101	696	27	559	30	696		12.7013	14.5115	0.192225	1.81024		4.83007	4.31036	-0.164236	-0.519712		0	0	0	0
chr2	80617236	80658906	+	Nup35	ENSMUSG00000026999.14	41670	997	3578	990	3588		875	3578	871	3588	122	3578	119	3588		24.455	24.2754	-0.0106368	-0.17964		3.40973	3.31661	-0.039946	-0.0931152		0	0	0	0
chr2	83644435	83664622	+	Zc3h15	ENSMUSG00000027091.14	20187	2802	6652	3262	7212		2660	6652	3110	7212	142	6652	152	7212		39.988	43.1226	0.108877	3.1346		2.1347	2.1076	-0.0184309	-0.027098		2	0.0990737	5.4533	0.270139
chr2	83724397	83806916	+	Itgav	ENSMUSG00000027087.11	82519	1449	4942	1938	6418		1323	4942	1819	6418	126	4942	119	6418		26.7705	28.3422	0.0823037	1.57162		2.54958	1.85416	-0.459491	-0.695415		1	0.0121184	2.53844	0.0307619
chr2	83812636	83883486	+	Fam171b	ENSMUSG00000048388.3	70850	1	59	0	26		1	59	0	26	0	59	0	26		1.69508	0.000384614	-12.1057	-1.6947		0.000169491	0.000384614	1.1822	0.000215123		0	0	0	0
chr2	84330626	84425411	-	Calcrl	ENSMUSG00000059588.13	94785	1788	12784	1450	11249		81	12784	74	11249	1707	12784	1376	11249		0.633605	0.657837	0.0541461	0.0242319		13.3526	12.2322	-0.12644	-1.12043		1	0.0105502	2.75382	0.0290533
chr2	84432855	84476775	-	Tfpi	ENSMUSG00000027082.15	43920	213	547	260	682		4	547	19	682	209	547	241	682		0.73128	2.78594	1.92967	2.05466		38.2084	35.3373	-0.112701	-2.87117		0	0	0	0
chr2	84500760	84531322	-	Gm13710	ENSMUSG00000087362.7	30562	4	1249	12	1951		3	1249	4	1951	1	1249	8	1951		0.2402	0.205028	-0.228415	-0.035172		0.0800721	0.410051	2.35643	0.329979		0	0	0	0
chr2	84600071	84650765	-	Ctnnd1	ENSMUSG00000034101.14	50694	27	297	38	253		9	297	12	253	18	297	26	253		3.03034	4.74312	0.646359	1.71278		6.06064	10.2767	0.761838	4.21608		0	0	0	0
chr2	84669215	84670770	-	Selenoh	ENSMUSG00000076437.10	1555	430	499	492	551		46	499	49	551	384	499	443	551		9.21846	8.89294	-0.0518648	-0.325517		76.9539	80.3993	0.0631879	3.44537		0	0	0	0
chr2	84671316	84679140	-	Tmx2	ENSMUSG00000050043.16	7824	744	1037	883	1225		52	1037	54	1225	692	1037	829	1225		5.01447	4.40817	-0.185918	-0.606303		66.731	67.6735	0.0202342	0.942514		1	0.127812	2.7337	0.349399
chr2	84678402	84688215	+	Med19	ENSMUSG00000027080.6	9813	325	527	409	588		288	527	372	588	37	527	37	588		54.649	63.2653	0.211221	8.61635		7.02089	6.29253	-0.158013	-0.728358		2	0.203811	5.26277	0.536306
chr2	84687970	84715180	-	Zdhhc5	ENSMUSG00000034075.10	27210	1671	2734	1575	2550		126	2734	111	2550	1545	2734	1464	2550		4.60864	4.35294	-0.0823479	-0.255691		56.5106	57.4118	0.0228247	0.901158		1	0.0367512	2.52414	0.0927652
chr2	84722104	84727350	-	Clp1	ENSMUSG00000027079.15	5246	384	665	337	607		24	665	10	607	360	665	327	607		3.60904	1.64746	-1.13137	-1.96157		54.1353	53.8715	-0.00704843	-0.263838		0	0	0	0
chr2	84798828	84810335	+	Ube2l6	ENSMUSG00000027078.14	11507	19	57	29	126		17	57	26	126	2	57	3	126		29.8247	20.635	-0.531415	-9.1897		3.50894	2.38103	-0.55945	-1.12791		0	0	0	0
chr2	84826997	84830213	+	Timm10	ENSMUSG00000027076.10	3216	116	164	142	196		110	164	137	196	6	164	5	196		67.0732	69.898	0.0595144	2.82478		3.6586	2.55107	-0.520187	-1.10753		0	0	0	0
chr2	84838850	84863594	+	Slc43a1	ENSMUSG00000027075.16	24744	3013	7938	4144	10665		2701	7938	3656	10665	312	7938	488	10665		34.0262	34.2804	0.0107359	0.254153		3.93046	4.57572	0.219298	0.645254		4	0.161655	10.8951	0.440311
chr2	84871924	84886710	-	Rtn4rl2	ENSMUSG00000050896.12	14786	0	73	3	75		0	73	2	75	0	73	1	75		0.000136986	2.6668	14.2488	2.66666		0.000136986	1.33346	13.2489	1.33333		0	0	0	0
chr2	84936579	84958509	+	Slc43a3	ENSMUSG00000027074.14	21930	807	1913	1194	2859		753	1913	1082	2859	54	1913	112	2859		39.3623	37.8454	-0.0566951	-1.51686		2.8228	3.91746	0.472792	1.09466		1	0.0455996	2.86388	0.130592
chr2	84980461	84983632	+	Prg2	ENSMUSG00000027073.5	3171	71	76	221	228		68	76	218	228	3	76	3	228		89.4737	95.614	0.0957588	6.14034		3.94749	1.31583	-1.58496	-2.63166		0	0	0	0
chr2	84998583	85037462	-	P2rx3	ENSMUSG00000027071.14	38879	12	90	5	72		1	90	2	72	11	90	3	72		1.11122	2.77791	1.32186	1.66669		12.2223	4.1668	-1.55251	-8.05552		0	0	0	0
chr2	85037234	85047109	+	Ssrp1	ENSMUSG00000027067.16	9875	6484	9337	8689	12070		6169	9337	8312	12070	315	9337	377	12070		66.0705	68.865	0.0597643	2.79448		3.37368	3.12345	-0.111182	-0.250228		0	0	0	0
chr2	85048022	85073048	+	Tnks1bp1	ENSMUSG00000033955.12	25026	161	678	154	845		141	678	135	845	20	678	19	845		20.7965	15.9763	-0.380402	-4.82013		2.94987	2.24853	-0.391666	-0.701335		0	0	0	0
chr2	86020633	86045171	+	Olfr1033	ENSMUSG00000045392.8	24538	23	635	34	993		1	635	9	993	22	635	25	993		0.157496	0.906354	2.52476	0.748858		3.46458	2.51763	-0.460613	-0.946949		0	0	0	0
chr2	90429754	90580647	-	Ptprj	ENSMUSG00000025314.16	150893	511	1527	733	1979		39	1527	59	1979	472	1527	674	1979		2.55403	2.98131	0.223168	0.427275		30.9103	34.0576	0.13989	3.14732		3	0.0198816	8.29564	0.054977
chr2	90479236	90488425	+	4933423P22Rik	ENSMUSG00000085471.1	9189	8	154	10	233		3	154	6	233	5	154	4	233		1.94812	2.57515	0.402577	0.627033		3.24682	1.71678	-0.91932	-1.53004		0	0	0	0
chr2	90677215	90736328	+	Nup160	ENSMUSG00000051329.13	59113	4068	9722	4366	10323		3765	9722	4062	10323	303	9722	304	10323		38.7266	39.349	0.0230031	0.622427		3.11664	2.94488	-0.0817837	-0.171762		2	0.0338335	5.56032	0.0940626
chr2	90745370	90781021	+	Fnbp4	ENSMUSG00000008200.14	35651	3896	10464	3861	10669		3387	10464	3394	10669	509	10464	467	10669		32.3681	31.8118	-0.0250119	-0.556328		4.8643	4.37717	-0.152234	-0.487129		1	0.0280497	2.66861	0.0748537
chr2	90847155	90866810	+	Mtch2	ENSMUSG00000027282.17	19655	1565	3177	1717	3111		1458	3177	1604	3111	107	3177	113	3111		45.8924	51.559	0.16797	5.66663		3.36796	3.63228	0.108999	0.264315		3	0.152633	7.72367	0.392962
chr2	90894634	90904827	-	Ndufs3	ENSMUSG00000005510.9	10193	1903	4189	1811	3991		179	4189	183	3991	1724	4189	1628	3991		4.2731	4.58532	0.10174	0.312221		41.1554	40.7918	-0.0128035	-0.363625		2	0.196213	5.32312	0.522233
chr2	90904740	90911626	+	Kbtbd4	ENSMUSG00000005505.12	6886	535	834	531	825		271	834	259	825	264	834	272	825		32.494	31.3939	-0.0496875	-1.10007		31.6547	32.9697	0.058722	1.31502		1	0.145222	2.52164	0.366198
chr2	90908716	90918258	-	Ptpmt1	ENSMUSG00000063235.16	9542	148	499	147	483		18	499	18	483	130	499	129	483		3.60723	3.72673	0.0470166	0.119494		26.0521	26.7081	0.0358761	0.655971		0	0	0	0
chr2	90940382	91019497	+	Celf1	ENSMUSG00000005506.16	79115	2691	26935	3046	27032		2337	26935	2683	27032	354	26935	363	27032		8.67644	9.92527	0.194003	1.24883		1.31428	1.34285	0.031034	0.0285778		2	0.0252797	5.36505	0.0678133
chr2	91035620	91045729	+	Rapsn	ENSMUSG00000002104.11	10109	35	64	13	46		34	64	9	46	1	64	4	46		53.1251	19.5654	-1.44109	-33.5597		1.56265	8.69585	2.47633	7.1332		0	0	0	0
chr2	91044092	91053933	-	Gm13778	ENSMUSG00000086495.7	9841	50	687	29	467		2	687	2	467	48	687	27	467		0.291135	0.428287	0.556887	0.137152		6.98691	5.7816	-0.273185	-1.20531		0	0	0	0
chr2	91054009	91066369	+	Psmc3	ENSMUSG00000002102.15	12360	4608	5515	4601	5437		4485	5515	4475	5437	123	5515	126	5437		81.3237	82.3064	0.0173298	0.982756		2.23028	2.31746	0.0553154	0.0871735		1	0.0809061	2.66247	0.21541
chr2	91061791	91070417	-	Slc39a13	ENSMUSG00000002105.15	8626	226	728	255	728		82	728	84	728	144	728	171	728		11.2637	11.5385	0.0347654	0.274725		19.7802	23.489	0.247927	3.70879		1	0.115929	2.66247	0.308656
chr2	91082390	91115756	+	Spi1	ENSMUSG00000002111.8	33366	42	469	50	480		40	469	46	480	2	469	4	480		8.5288	9.58335	0.168187	1.05455		0.42646	0.833354	0.966517	0.406894		2	0.0599413	5.50422	0.164965
chr2	91118144	91136516	+	Mybpc3	ENSMUSG00000002100.15	18372	154	290	122	215		74	290	65	215	80	290	57	215		25.5173	30.2326	0.244631	4.71532		27.5862	26.5117	-0.0573213	-1.07457		2	0.108861	5.14164	0.279863
chr2	91137360	91183837	-	Madd	ENSMUSG00000040687.16	46477	4403	10298	4207	9950		556	10298	542	9950	3847	10298	3665	9950		5.39911	5.44724	0.0128037	0.0481296		37.3568	36.8342	-0.0203249	-0.522597		2	0.043032	5.4539	0.117346
chr2	91184061	91202834	-	Nr1h3	ENSMUSG00000002108.10	18773	94	305	107	344		20	305	16	344	74	305	91	344		6.55741	4.65119	-0.495526	-1.90622		24.2623	26.4535	0.124742	2.19119		1	0.053268	2.67818	0.142661
chr2	91202885	91214098	+	Acp2	ENSMUSG00000002103.15	11213	477	1154	460	925		401	1154	404	925	76	1154	56	925		34.7487	43.6757	0.329871	8.92698		6.5858	6.05406	-0.121454	-0.531732		0	0	0	0
chr2	91211572	91236982	-	Ddb2	ENSMUSG00000002109.14	25410	1828	5504	1363	4327		256	5504	214	4327	1572	5504	1149	4327		4.65116	4.94569	0.0885804	0.294528		28.561	26.5542	-0.105109	-2.00685		1	0.0393546	2.79879	0.110145
chr2	91264974	91276931	+	Arfgap2	ENSMUSG00000027255.14	11957	4194	6931	4131	6599		3628	6931	3557	6599	566	6931	574	6599		52.3445	53.9021	0.0423026	1.55757		8.16621	8.69829	0.0910648	0.532078		1	0.083633	2.66256	0.222678
chr2	91275068	91444704	-	1110051M20Rik	ENSMUSG00000040591.18	169636	237	1445	220	1501		63	1445	53	1501	174	1445	167	1501		4.35987	3.53099	-0.304214	-0.828882		12.0415	11.1259	-0.114094	-0.915607		2	0.01179	5.59758	0.0329976
chr2	91457511	91513779	+	Lrp4	ENSMUSG00000027253.15	56268	51	139	25	75		45	139	20	75	6	139	5	75		32.3741	26.6668	-0.279799	-5.70738		4.31662	6.66679	0.627092	2.35018		1	0.0177721	2.76885	0.0492083
chr2	91526762	91620664	+	Ckap5	ENSMUSG00000040549.16	93902	12327	25337	18496	34563		11885	25337	17947	34563	442	25337	549	34563		46.9077	51.9255	0.146618	5.01778		1.74448	1.5884	-0.135223	-0.156081		1	0.0106494	2.60353	0.027726
chr2	91625320	91636414	-	F2	ENSMUSG00000027249.15	11094	14	57	40	97		6	57	8	97	8	57	32	97		10.5265	8.24752	-0.35199	-2.27896		14.0352	32.9898	1.23296	18.9545		0	0	0	0
chr2	91643669	91649791	-	Zfp408	ENSMUSG00000075040.9	6122	428	861	366	685		95	861	79	685	333	861	287	685		11.0337	11.5329	0.0638347	0.499168		38.676	41.8978	0.115438	3.22185		0	0	0	0
chr2	91649860	91672326	+	Arhgap1	ENSMUSG00000027247.16	22466	2798	9396	2225	7125		2412	9396	1941	7125	386	9396	284	7125		25.6705	27.2421	0.0857269	1.57161		4.10813	3.98597	-0.0435531	-0.122166		1	0.0445117	2.66861	0.118784
chr2	91674618	91710576	-	Atg13	ENSMUSG00000027244.14	35958	1197	4701	1002	4297		162	4701	152	4297	1035	4701	850	4297		3.44608	3.53735	0.0377155	0.0912765		22.0166	19.7812	-0.154458	-2.23535		2	0.0556204	5.31446	0.147796
chr2	91710852	91721545	+	Harbi1	ENSMUSG00000027243.8	10693	132	287	131	286		85	287	82	286	47	287	49	286		29.6167	28.6714	-0.0468033	-0.945396		16.3763	17.1329	0.0651565	0.75656		0	0	0	0
chr2	91730134	91918849	+	Ambra1	ENSMUSG00000040506.16	188715	2027	32309	1931	32646		1724	32309	1686	32646	303	32309	245	32646		5.33597	5.16449	-0.0471254	-0.171483		0.937819	0.750475	-0.321506	-0.187344		3	0.015897	7.99166	0.0423478
chr2	91929805	91932297	-	Mdk	ENSMUSG00000027239.14	2492	24	61	28	59		10	61	14	59	14	61	14	59		16.3936	23.7289	0.533517	7.33536		22.9509	23.7289	0.0480942	0.777997		0	0	0	0
chr2	91932824	91975864	-	Dgkz	ENSMUSG00000040479.11	43040	20839	47798	19401	43420		1611	47798	1437	43420	19228	47798	17964	43420		3.37043	3.30953	-0.0263059	-0.0608991		40.2276	41.3726	0.0404904	1.14501		0	0	0	0
chr2	92093117	92364666	+	Phf21a	ENSMUSG00000058318.15	271549	1270	12557	1366	13682		970	12557	1064	13682	300	12557	302	13682		7.72478	7.77664	0.00965418	0.0518658		2.38911	2.20728	-0.114201	-0.181826		0	0	0	0
chr2	92374676	92381217	+	Pex16	ENSMUSG00000027222.14	6541	1120	1998	1129	2056		975	1998	993	2056	145	1998	136	2056		48.7988	48.2977	-0.0148922	-0.501133		7.25726	6.61479	-0.13373	-0.642471		0	0	0	0
chr2	92383676	92401263	-	Mapk8ip1	ENSMUSG00000027223.15	17587	98	213	97	188		44	213	39	188	54	213	58	188		20.6573	20.7447	0.0060917	0.0874088		25.3521	30.8511	0.283214	5.49895		0	0	0	0
chr2	92403646	92434043	-	Cry2	ENSMUSG00000068742.11	30397	259	649	235	671		40	649	42	671	219	649	193	671		6.16334	6.25933	0.0222949	0.0959858		33.7442	28.7631	-0.230424	-4.98118		0	0	0	0
chr2	92452764	92460538	-	Slc35c1	ENSMUSG00000049922.8	7774	146	891	70	744		18	891	7	744	128	891	63	744		2.02021	0.940874	-1.10243	-1.07934		14.3659	8.46775	-0.762596	-5.89814		1	0.128634	3.1357	0.403357
chr2	92915098	92956058	+	Syt13	ENSMUSG00000027220.2	40960	830	8205	1536	14780		732	8205	1369	14780	98	8205	167	14780		8.92139	9.26252	0.0541358	0.341127		1.19439	1.12991	-0.0800772	-0.0644889		1	0.0244141	2.86388	0.0699189
chr2	92965151	93046167	-	Prdm11	ENSMUSG00000075028.11	81016	225	2572	509	6071		33	2572	72	6071	192	2572	437	6071		1.28305	1.18597	-0.113515	-0.0970844		7.46501	7.19816	-0.052517	-0.266855		0	0	0	0
chr2	93027956	93044732	+	4631405J19Rik	ENSMUSG00000075027.10	16776	74	1251	181	2832		51	1251	107	2832	23	1251	74	2832		4.07675	3.77825	-0.109699	-0.298494		1.83854	2.613	0.507148	0.774461		0	0	0	0
chr2	93085942	93098244	-	Gm13802	ENSMUSG00000087559.1	12302	2	56	0	4		0	56	0	4	2	56	0	4		0.000178571	0.00249994	3.80732	0.00232137		3.5716	0.00249994	-10.4805	-3.5691		0	0	0	0
chr2	93187548	93201759	+	Trp53i11	ENSMUSG00000068735.14	14211	2765	15694	3156	17130		2272	15694	2647	17130	493	15694	509	17130		14.4769	15.4524	0.0940833	0.975552		3.14133	2.9714	-0.080234	-0.169933		1	0.070368	2.79557	0.196719
chr2	93201760	93334505	-	Tspan18	ENSMUSG00000027217.13	132745	42	451	46	412		33	451	41	412	9	451	5	412		7.31709	9.95148	0.44364	2.63438		1.99559	1.21362	-0.717501	-0.781971		7	0.0527327	19.1904	0.144566
chr2	93403547	93417830	+	Gm13807	ENSMUSG00000085852.1	14283	59	623	52	743		32	623	37	743	27	623	15	743		5.13645	4.97982	-0.0446773	-0.156627		4.33388	2.01886	-1.10212	-2.31503		0	0	0	0
chr2	93419111	93463140	-	Cd82	ENSMUSG00000027215.13	44029	631	3450	1011	4013		88	3450	123	4013	543	3450	888	4013		2.55073	3.06504	0.264998	0.514314		15.7391	22.1281	0.491523	6.38895		2	0.0454246	5.2001	0.118106
chr2	93452819	93469871	+	Gm10804	ENSMUSG00000075025.10	17052	40	482	72	608		28	482	41	608	12	482	31	608		5.80915	6.74344	0.215157	0.934288		2.48965	5.0987	1.03419	2.60905		0	0	0	0
chr2	93661028	93822568	-	Ext2	ENSMUSG00000027198.16	161540	598	6811	670	7871		61	6811	60	7871	537	6811	610	7871		0.895611	0.762293	-0.232527	-0.133318		7.88431	7.74997	-0.0247932	-0.134337		2	0.0123808	5.52533	0.0342041
chr2	93833467	93849943	-	Accs	ENSMUSG00000040272.14	16476	284	951	385	1319		68	951	77	1319	216	951	308	1319		7.15038	5.83776	-0.292604	-1.31261		22.7129	23.351	0.0399716	0.638087		1	0.0606943	2.69644	0.163659
chr2	93980034	93983575	+	Alkbh3os1	ENSMUSG00000027196.11	3541	44	111	39	130		21	111	21	130	23	111	18	130		18.919	16.1539	-0.227952	-2.76508		20.7208	13.8462	-0.581587	-6.87457		0	0	0	0
chr2	93980550	94010807	-	Alkbh3	ENSMUSG00000040174.14	30257	642	5692	733	6062		199	5692	186	6062	443	5692	547	6062		3.49614	3.0683	-0.188324	-0.427841		7.78285	9.02343	0.213376	1.24057		0	0	0	0
chr2	94032689	94157964	-	Hsd17b12	ENSMUSG00000027195.10	125275	618	8490	842	9276		39	8490	64	9276	579	8490	778	9276		0.459365	0.689954	0.586858	0.230589		6.81979	8.38724	0.298468	1.56745		2	0.0159649	5.40231	0.0431236
chr2	94160636	94264918	-	Mir670hg	ENSMUSG00000075020.6	104282	15	511	12	417		0	511	0	417	15	511	12	417		1.95695e-05	2.39808e-05	0.293276	4.41134e-06		2.93544	2.87772	-0.0286498	-0.0577186		0	0	0	0
chr2	94300767	94406689	-	Ttc17	ENSMUSG00000027194.16	105922	1679	14217	1770	14836		275	14217	279	14836	1404	14217	1491	14836		1.9343	1.88056	-0.0406516	-0.0537432		9.8755	10.0499	0.0252522	0.174377		3	0.0283227	9.24314	0.0872636
chr2	94411682	94438136	-	Api5	ENSMUSG00000027193.12	26454	3652	9591	4491	9456		375	9591	339	9456	3277	9591	4152	9456		3.90992	3.58503	-0.125154	-0.32489		34.1674	43.9086	0.361882	9.74118		0	0	0	0
chr2	96318169	97631666	+	Lrrc4c	ENSMUSG00000050587.14	1313497	0	108	0	63		0	108	0	63	0	108	0	63		9.25925e-05	0.00015873	0.777607	6.61374e-05		9.25925e-05	0.00015873	0.777607	6.61374e-05		0	0	0	0
chr2	98662237	98664083	+	Gm10801	ENSMUSG00000075015.3	1846	3	71	4	54		1	71	1	54	2	71	3	54		1.40859	1.85203	0.394859	0.443444		2.81704	5.55573	0.979797	2.73869		2	1.08342	11.6876	6.33133
chr2	98666547	98667301	-	Gm10800	ENSMUSG00000075014.1	754	969	636	752	511		346	636	258	511	623	636	494	511		54.4025	50.4892	-0.107697	-3.91328		97.956	96.6732	-0.0190176	-1.28278		2	2.65252	11.724	15.5491
chr2	101560781	101649532	-	B230118H07Rik	ENSMUSG00000027165.16	88751	676	5648	393	3608		125	5648	65	3608	551	5648	328	3608		2.21317	1.80155	-0.296875	-0.41162		9.75567	9.09091	-0.101816	-0.664756		4	0.0450699	11.0993	0.125061
chr2	101624718	101632529	+	Rag2	ENSMUSG00000032864.4	7811	944	8336	319	2478		659	8336	254	2478	285	8336	65	2478		7.90547	10.2502	0.374729	2.34473		3.41891	2.62309	-0.38227	-0.79582		0	0	0	0
chr2	101638282	101649501	-	Rag1	ENSMUSG00000061311.6	11219	8298	49943	4217	21464		157	49943	72	21464	8141	49943	4145	21464		0.314359	0.335446	0.0936689	0.0210873		16.3006	19.3114	0.24453	3.01082		1	0.0891345	2.75631	0.245682
chr2	101678429	101701669	+	Traf6	ENSMUSG00000027164.8	23240	1066	4737	991	4483		951	4737	906	4483	115	4737	85	4483		20.076	20.2097	0.00957489	0.133684		2.4277	1.89605	-0.35659	-0.531645		0	0	0	0
chr2	101714285	101883027	-	Prr5l	ENSMUSG00000032841.15	168742	37	803	40	1338		5	803	3	1338	32	803	37	1338		0.622677	0.224223	-1.47355	-0.398455		3.98507	2.76533	-0.527153	-1.21974		2	0.0118524	5.59758	0.0331724
chr2	101886247	101901646	+	Commd9	ENSMUSG00000027163.13	15399	252	1348	333	1545		198	1348	284	1545	54	1348	49	1545		14.6884	18.3819	0.323604	3.69345		4.00594	3.17153	-0.336964	-0.834415		0	0	0	0
chr2	101950203	102186385	-	Ldlrad3	ENSMUSG00000048058.17	236182	130	9443	125	9089		28	9443	24	9089	102	9443	101	9089		0.296517	0.264057	-0.167268	-0.0324604		1.08017	1.11123	0.0409099	0.0310682		9	0.0381062	24.7573	0.104823
chr2	102039629	102066725	+	Gm13919	ENSMUSG00000085417.1	27096	1185	4998	863	3741		739	4998	617	3741	446	4998	246	3741		14.7859	16.4929	0.157623	1.707		8.92357	6.57578	-0.440458	-2.34779		0	0	0	0
chr2	102300119	102407828	-	Trim44	ENSMUSG00000027189.16	107709	668	6986	777	7564		36	6986	39	7564	632	6986	738	7564		0.515318	0.515602	0.00079419	0.000283756		9.04667	9.75674	0.109014	0.710078		2	0.0185686	6.0532	0.0561996
chr2	102658659	102790784	+	Slc1a2	ENSMUSG00000005089.15	132125	4	63	7	42		3	63	5	42	1	63	2	42		4.76206	11.905	1.32191	7.14292		1.58746	4.76213	1.58489	3.17467		2	0.0151372	5.412	0.0409612
chr2	102811141	102901665	-	Cd44	ENSMUSG00000005087.17	90524	439	4589	320	5703		87	4589	68	5703	352	4589	252	5703		1.89584	1.19236	-0.669021	-0.703483		7.67052	4.41873	-0.795693	-3.25179		2	0.0220936	5.62689	0.0621591
chr2	103021075	103073513	-	Pdhx	ENSMUSG00000010914.10	52438	596	5352	755	5165		62	5352	61	5165	534	5352	694	5165		1.15845	1.18103	0.0278508	0.0225808		9.97758	13.4366	0.429406	3.45901		0	0	0	0
chr2	103073675	103092644	+	Apip	ENSMUSG00000010911.12	18969	197	870	474	1400		175	870	442	1400	22	870	32	1400		20.115	31.5714	0.650351	11.4565		2.52875	2.28572	-0.145773	-0.243026		1	0.0527176	2.50519	0.132068
chr2	103263433	103303278	-	Ehf	ENSMUSG00000012350.15	39845	1	74	5	46		0	74	1	46	1	74	4	46		0.000135135	2.17413	13.9737	2.17399		1.35148	8.69585	2.68578	7.34437		0	0	0	0
chr2	103453849	103485160	-	Cat	ENSMUSG00000027187.10	31311	3186	6923	3685	7512		78	6923	109	7512	3108	6923	3576	7512		1.12668	1.45101	0.364982	0.324332		44.8938	47.6038	0.0845605	2.71		0	0	0	0
chr2	103566310	103718423	+	Abtb2	ENSMUSG00000032724.5	152113	3775	121869	2506	87560		3293	121869	2180	87560	482	121869	326	87560		2.70208	2.48972	-0.118087	-0.21236		0.395507	0.372316	-0.0871737	-0.0231905		5	0.0328703	13.1293	0.0863127
chr2	103721256	103761270	-	Nat10	ENSMUSG00000027185.15	40014	1277	3063	1522	3450		147	3063	145	3450	1130	3063	1377	3450		4.79922	4.2029	-0.191414	-0.596318		36.8919	39.913	0.113555	3.02111		1	0.0249913	2.76998	0.0692253
chr2	103762941	103797649	-	Caprin1	ENSMUSG00000027184.14	34708	12924	27545	13768	28571		727	27545	747	28571	12197	27545	13021	28571		2.63932	2.61454	-0.0136082	-0.0247783		44.2803	45.5742	0.0415528	1.29391		1	0.0288118	2.7337	0.0787628
chr2	103804452	103810622	-	4930547E08Rik	ENSMUSG00000086687.1	6170	15	85	9	63		7	85	5	63	8	85	4	63		8.2354	7.93665	-0.0533082	-0.298748		9.41187	6.34936	-0.567872	-3.06252		1	0.162075	2.66861	0.432514
chr2	103957986	103981878	+	Lmo2	ENSMUSG00000032698.15	23892	7	60	10	89		5	60	8	89	2	60	2	89		8.33349	8.98887	0.109219	0.65538		3.33349	2.2473	-0.568842	-1.08619		0	0	0	0
chr2	104027721	104063240	+	Fbxo3	ENSMUSG00000027180.12	35519	2758	7215	3019	7474		2634	7215	2886	7474	124	7215	133	7474		36.5073	38.6139	0.0809348	2.10658		1.71864	1.7795	0.0502049	0.0608605		1	0.0281539	2.53844	0.0714671
chr2	104069849	104091187	+	Cd59b	ENSMUSG00000068686.12	21338	7	67	3	58		6	67	2	58	1	67	1	58		8.95536	3.44844	-1.37681	-5.50692		1.49268	1.72431	0.208108	0.231623		1	0.0468647	2.66861	0.125064
chr2	104143073	104411013	-	D430041D05Rik	ENSMUSG00000068373.15	267940	34	230	62	382		2	230	11	382	32	230	51	382		0.869608	2.87961	1.72743	2.01		13.9131	13.3508	-0.0595149	-0.562273		1	0.00373218	2.51947	0.00940311
chr2	104426481	104494446	-	Hipk3	ENSMUSG00000027177.14	67965	1846	7615	1876	7977		144	7615	147	7977	1702	7615	1729	7977		1.89101	1.8428	-0.0372549	-0.0482066		22.3506	21.6748	-0.0442954	-0.675809		0	0	0	0
chr2	104590523	104665429	+	Cstf3	ENSMUSG00000027176.8	74906	1496	17098	1486	17415		1297	17098	1284	17415	199	17098	202	17415		7.58568	7.37295	-0.0410362	-0.212728		1.16388	1.15992	-0.00491604	-0.00395922		0	0	0	0
chr2	104657288	104712169	-	Tcp11l1	ENSMUSG00000027175.10	54881	9	56	8	38		0	56	1	38	9	56	7	38		0.000178571	2.63184	13.8473	2.63166		16.0716	18.4213	0.196861	2.34969		0	0	0	0
chr2	104754795	104816760	-	Qser1	ENSMUSG00000074994.5	61965	765	5445	917	6856		60	5445	95	6856	705	5445	822	6856		1.10193	1.38565	0.330529	0.283719		12.9477	11.9895	-0.11092	-0.95816		1	0.0161381	2.5817	0.0416638
chr2	104830741	104849876	-	Prrg4	ENSMUSG00000027171.10	19135	94	325	220	650		11	325	10	650	83	325	210	650		3.38465	1.53848	-1.1375	-1.84617		25.5385	32.3077	0.339205	6.76922		1	0.0522603	2.52174	0.131787
chr2	104867805	105017904	+	Ccdc73	ENSMUSG00000045106.12	150099	165	1729	171	1808		112	1729	138	1808	53	1729	33	1808		6.47774	7.63275	0.236712	1.15501		3.06536	1.82523	-0.747981	-1.24013		2	0.0133245	5.83976	0.0389061
chr2	104999656	105017080	-	Eif3m	ENSMUSG00000027170.12	17424	8014	12550	8045	14187		213	12550	236	14187	7801	12550	7809	14187		1.69721	1.6635	-0.0289488	-0.0337165		62.1594	55.0433	-0.175403	-7.11601		1	0.0573921	3.23623	0.185734
chr2	105224320	105379796	+	Them7	ENSMUSG00000055312.2	155476	1	103	1	92		1	103	1	92	0	103	0	92		0.97097	1.08706	0.162938	0.116094		9.70873e-05	0.000108696	0.162938	1.16082e-05		2	0.0128637	5.20705	0.033491
chr2	105386291	105399319	-	Rcn1	ENSMUSG00000005973.6	13028	183	813	396	1264		20	813	30	1264	163	813	366	1264		2.46004	2.37343	-0.051709	-0.0866112		20.0492	28.9557	0.530302	8.90649		1	0.0767578	2.52433	0.193762
chr2	105701027	105904564	-	Elp4	ENSMUSG00000027167.11	203537	357	12544	318	13482		25	12544	32	13482	332	12544	286	13482		0.199299	0.237354	0.252105	0.038055		2.64668	2.12135	-0.319205	-0.525337		0	0	0	0
chr2	105904638	105965558	+	Immp1l	ENSMUSG00000042670.5	60920	1183	9851	1032	10350		1113	9851	962	10350	70	9851	70	10350		11.2983	9.29469	-0.281633	-2.00366		0.710589	0.676329	-0.0712887	-0.0342593		0	0	0	0
chr2	105966709	106003549	-	Dnajc24	ENSMUSG00000027166.14	36840	359	2042	375	2055		156	2042	142	2055	203	2042	233	2055		7.63957	6.90998	-0.144811	-0.729593		9.94124	11.3382	0.189695	1.39697		0	0	0	0
chr2	106693269	106868356	+	Mpped2	ENSMUSG00000016386.15	175087	5	124	2	58		4	124	2	58	1	124	0	58		3.22588	3.44844	0.0962501	0.222558		0.806532	0.000172413	-12.1916	-0.806359		0	0	0	0
chr2	106962527	106974424	-	Arl14ep	ENSMUSG00000027122.15	11897	246	1245	271	1240		84	1245	52	1240	162	1245	219	1240		6.747	4.19356	-0.686071	-2.55344		13.0121	17.6613	0.440742	4.64924		0	0	0	0
chr2	109092297	109280748	-	Mettl15	ENSMUSG00000057234.9	188451	88	3263	102	4200		12	3263	11	4200	76	3263	91	4200		0.367763	0.261907	-0.48972	-0.105856		2.32915	2.16667	-0.104324	-0.162479		0	0	0	0
chr2	109280738	109341747	+	Kif18a	ENSMUSG00000027115.14	61009	1720	7308	1930	10247		1582	7308	1700	10247	138	7308	230	10247		21.6475	16.5902	-0.383868	-5.05729		1.88834	2.24456	0.249312	0.356217		0	0	0	0
chr2	109890853	109901003	+	Lin7c	ENSMUSG00000027162.7	10150	1801	3102	1852	3028		1747	3102	1797	3028	54	3102	55	3028		56.3185	59.3461	0.0755443	3.0276		1.74082	1.81638	0.0613056	0.0755681		0	0	0	0
chr2	109902396	109913319	-	Platr8	ENSMUSG00000063751.6	10923	21	263	29	236		17	263	24	236	4	263	5	236		6.46391	10.1695	0.653773	3.70562		1.52095	2.11869	0.478197	0.597736		0	0	0	0
chr2	109917647	110014257	+	Lgr4	ENSMUSG00000050199.13	96610	18	451	10	256		18	451	8	256	0	451	2	256		3.99115	3.12504	-0.352932	-0.866114		2.21729e-05	0.781289	15.1048	0.781267		0	0	0	0
chr2	110017817	110173360	+	Ccdc34	ENSMUSG00000027160.16	155543	148	1628	179	2165		117	1628	140	2165	31	1628	39	2165		7.18674	6.46652	-0.152348	-0.720221		1.90418	1.80139	-0.0800613	-0.102793		0	0	0	0
chr2	110031250	110050479	-	Ccdc34os	ENSMUSG00000086186.1	19229	13	73	12	84		7	73	9	84	6	73	3	84		9.58916	10.7144	0.160073	1.12523		8.2193	3.57154	-1.20247	-4.64776		0	0	0	0
chr2	112239468	112247111	+	Lpcat4	ENSMUSG00000027134.4	7643	283	521	316	533		227	521	266	533	56	521	50	533		43.5701	49.9062	0.195882	6.33613		10.7486	9.38088	-0.196351	-1.3677		0	0	0	0
chr2	112261926	112263269	+	Nop10	ENSMUSG00000027133.3	1343	621	648	677	688		614	648	672	688	7	648	5	688		94.7531	97.6744	0.0438078	2.92133		1.08026	0.726759	-0.571833	-0.353504		0	0	0	0
chr2	112265825	112363163	+	Slc12a6	ENSMUSG00000027130.15	97338	1937	30136	1912	30881		1655	30136	1603	30881	282	30136	309	30881		5.49177	5.19089	-0.0812883	-0.300877		0.935758	1.00062	0.0966801	0.0648574		0	0	0	0
chr2	112266314	112406319	+	Gm21985	ENSMUSG00000096764.1	140005	112	226	90	227		107	226	82	227	5	226	8	227		47.3452	36.1234	-0.390284	-11.2218		2.21243	3.52427	0.671692	1.31184		0	0	0	0
chr2	112363011	112368027	-	Emc4	ENSMUSG00000027131.3	5016	646	1813	621	1687		80	1813	78	1687	566	1813	543	1687		4.41258	4.6236	0.0673931	0.211017		31.219	32.1873	0.0440691	0.968341		0	0	0	0
chr2	112379211	112414240	+	Katnbl1	ENSMUSG00000027132.3	35029	444	1407	562	1533		361	1407	499	1533	83	1407	63	1533		25.6574	32.5506	0.343306	6.89313		5.89908	4.1096	-0.521494	-1.78949		0	0	0	0
chr2	112454997	112472162	+	Emc7	ENSMUSG00000055943.5	17165	765	2771	749	2573		718	2771	684	2573	47	2771	65	2573		25.9112	26.5838	0.0369677	0.672531		1.69614	2.52624	0.574733	0.830096		0	0	0	0
chr2	112492964	112634573	+	Aven	ENSMUSG00000003604.14	141609	205	3692	306	4543		183	3692	264	4543	22	3692	42	4543		4.95667	5.81114	0.229451	0.854474		0.595886	0.924501	0.63364	0.328616		0	0	0	0
chr2	112631355	113217096	-	Ryr3	ENSMUSG00000057378.15	585741	61	470	60	405		18	470	19	405	43	470	41	405		3.82981	4.69138	0.292741	0.861574		9.14896	10.1235	0.146026	0.974523		1	0.00170724	2.52433	0.00430964
chr2	113327736	113716767	+	Fmn1	ENSMUSG00000044042.18	389031	23	1720	12	1176		21	1720	7	1176	2	1720	5	1176		1.22094	0.595247	-1.03643	-0.625689		0.116285	0.425179	1.87041	0.308894		2	0.00514098	5.33551	0.0137149
chr2	113776362	113829121	-	Scg5	ENSMUSG00000023236.7	52759	48	860	44	756		13	860	21	756	35	860	23	756		1.51164	2.77779	0.877824	1.26615		4.06978	3.04234	-0.419769	-1.02744		0	0	0	0
chr2	113831492	113848661	-	Arhgap11a	ENSMUSG00000041219.14	17169	1769	6128	2168	8184		201	6128	329	8184	1568	6128	1839	8184		3.28003	4.02004	0.293502	0.740013		25.5875	22.4707	-0.187394	-3.11679		1	0.0582445	2.60353	0.151641
chr2	114101170	114187024	-	Aqr	ENSMUSG00000040383.16	85854	4046	12441	4859	13419		305	12441	371	13419	3741	12441	4488	13419		2.45157	2.76474	0.173435	0.313165		30.0699	33.4451	0.153474	3.37518		0	0	0	0
chr2	114193461	114201469	-	Zfp770	ENSMUSG00000040321.3	8008	223	417	223	408		61	417	65	408	162	417	158	408		14.6283	15.9314	0.123109	1.30308		38.8489	38.7255	-0.00459101	-0.12343		0	0	0	0
chr2	114516416	114654964	-	Dph6	ENSMUSG00000057147.13	138548	209	6934	211	7671		26	6934	28	7671	183	6934	183	7671		0.374965	0.365012	-0.038812	-0.009953		2.63917	2.38561	-0.145727	-0.253561		0	0	0	0
chr2	115556786	115581555	-	Gm13977	ENSMUSG00000086735.1	24769	3	69	3	101		0	69	0	101	3	69	3	101		0.000144927	9.90098e-05	-0.549686	-4.59175e-05		4.34796	2.97039	-0.549686	-1.37757		0	0	0	0
chr2	115581716	115778768	+	BC052040	ENSMUSG00000040282.13	197052	140	8020	188	11676		114	8020	144	11676	26	8020	44	11676		1.42145	1.2333	-0.204837	-0.188148		0.324191	0.376842	0.217118	0.0526515		1	0.0050748	3.05914	0.0155245
chr2	115863064	116065839	-	Meis2	ENSMUSG00000027210.20	202775	10	780	10	186		2	780	3	186	8	780	7	186		0.256423	1.61296	2.65311	1.35653		1.02565	3.76349	1.87553	2.73784		0	0	0	0
chr2	117121374	117182279	+	Spred1	ENSMUSG00000027351.14	60905	443	6083	521	4674		406	6083	498	4674	37	6083	23	4674		6.67434	10.6547	0.674791	3.98035		0.608254	0.492086	-0.305764	-0.116168		1	0.016419	2.66861	0.0438159
chr2	117249739	117271540	+	Fam98b	ENSMUSG00000027349.5	21801	469	2733	543	2865		410	2733	474	2865	59	2733	69	2865		15.0018	16.5445	0.141213	1.54267		2.1588	2.40838	0.157831	0.249577		2	0.0917389	5.2877	0.242544
chr2	117279993	117343001	-	Rasgrp1	ENSMUSG00000027347.18	63008	13822	82164	12045	68798		914	82164	903	68798	12908	82164	11142	68798		1.11241	1.31254	0.238672	0.200129		15.71	16.1952	0.0438825	0.485195		3	0.047613	7.98141	0.126673
chr2	117414392	117417697	-	Gm13982	ENSMUSG00000085681.1	3305	35	195	15	96		8	195	7	96	27	195	8	96		4.10261	7.29176	0.829725	3.18915		13.8462	8.33343	-0.732508	-5.51277		0	0	0	0
chr2	118130424	118256966	-	Fsip1	ENSMUSG00000027344.14	126542	24	169	26	207		3	169	5	207	21	169	21	207		1.77521	2.41551	0.444339	0.6403		12.4261	10.145	-0.292607	-2.28112		1	0.00790251	2.85603	0.0225698
chr2	118388618	118475234	+	Eif2ak4	ENSMUSG00000005102.13	86616	1164	4540	1228	5125		1003	4540	1074	5125	161	4540	154	5125		22.0925	20.9561	-0.0761873	-1.13641		3.54626	3.00488	-0.23899	-0.541378		1	0.0115452	2.79879	0.0323126
chr2	118475850	118479711	-	Srp14	ENSMUSG00000009549.14	3861	1285	2188	1185	1952		62	2188	63	1952	1223	2188	1122	1952		2.83364	3.22746	0.187743	0.393822		55.8958	57.4795	0.040308	1.58371		1	0.259	2.77767	0.719417
chr2	118528757	118549687	-	Bmf	ENSMUSG00000040093.15	20930	750	4057	364	2413		103	4057	54	2413	647	4057	310	2413		2.53882	2.23788	-0.182026	-0.300942		15.9477	12.8471	-0.311912	-3.10066		3	0.143335	8.12812	0.388348
chr2	118598211	118641591	+	Bub1b	ENSMUSG00000040084.9	43380	6165	11508	8970	16025		5916	11508	8661	16025	249	11508	309	16025		51.4077	54.0468	0.0722243	2.63909		2.16371	1.92824	-0.166226	-0.235475		0	0	0	0
chr2	118663303	118698020	+	Pak6	ENSMUSG00000074923.10	34717	58	598	7	92		51	598	7	92	7	598	0	92		8.52844	7.6088	-0.164614	-0.919647		1.17059	0.000108696	-13.3946	-1.17048		6	0.172826	16.7267	0.481802
chr2	118707517	118728438	-	Plcb2	ENSMUSG00000040061.17	20921	4323	8258	4448	8165		520	8258	558	8165	3803	8258	3890	8165		6.29693	6.83405	0.118093	0.537124		46.0523	47.6424	0.0489717	1.59006		0	0	0	0
chr2	118814003	118853957	+	Knstrn	ENSMUSG00000027331.15	39954	1421	6957	1941	9835		1115	6957	1489	9835	306	6957	452	9835		16.027	15.1398	-0.0821597	-0.887217		4.39845	4.59583	0.0633312	0.197383		0	0	0	0
chr2	118861954	118882909	+	Ivd	ENSMUSG00000027332.11	20955	1008	2268	950	2081		856	2268	820	2081	152	2268	130	2081		37.7425	39.4041	0.0621568	1.66163		6.70194	6.247	-0.101416	-0.454943		0	0	0	0
chr2	118900377	118924528	+	Bahd1	ENSMUSG00000040007.8	24151	239	1980	226	1792		223	1980	207	1792	16	1980	19	1792		11.2626	11.5513	0.0365169	0.288713		0.808086	1.06027	0.391856	0.252188		0	0	0	0
chr2	119017779	119029393	-	Ccdc32	ENSMUSG00000039983.13	11614	101	574	114	595		11	574	10	595	90	574	104	595		1.91639	1.68069	-0.189341	-0.235705		15.6795	17.479	0.156747	1.79955		1	0.086103	2.52433	0.217352
chr2	119034790	119039769	+	Rpusd2	ENSMUSG00000027324.1	4979	68	135	75	119		65	135	71	119	3	135	4	119		48.1482	59.6639	0.309377	11.5157		2.22229	3.36143	0.597023	1.13913		0	0	0	0
chr2	119047119	119105501	+	Knl1	ENSMUSG00000027326.13	58382	4072	9924	6907	15475		3704	9924	6365	15475	368	9924	542	15475		37.3237	41.1309	0.140131	3.8072		3.70818	3.50242	-0.0823588	-0.205759		2	0.0342571	5.27214	0.0903042
chr2	119112793	119147445	+	Rad51	ENSMUSG00000027323.10	34652	706	1654	1053	2302		659	1654	996	2302	47	1654	57	2302		39.8428	43.2667	0.118939	3.42392		2.8416	2.47611	-0.198628	-0.36549		0	0	0	0
chr2	119137001	119157034	-	Rmdn3	ENSMUSG00000070730.11	20033	643	2326	702	2576		149	2326	155	2576	494	2326	547	2576		6.40585	6.01708	-0.0903256	-0.388767		21.2382	21.2345	-0.000251728	-0.00370541		2	0.0998353	5.40231	0.269671
chr2	119172500	119208795	-	Dnajc17	ENSMUSG00000034278.3	36295	433	763	548	899		25	763	29	899	408	763	519	899		3.27655	3.22582	-0.022514	-0.0507354		53.4731	57.7308	0.110527	4.25768		2	0.055104	5.58709	0.153936
chr2	119208617	119217049	+	Zfyve19	ENSMUSG00000068580.11	8432	553	1243	650	1322		471	1243	555	1322	82	1243	95	1322		37.8922	41.9819	0.147865	4.08965		6.59695	7.18609	0.123407	0.589138		0	0	0	0
chr2	119237362	119249527	+	Spint1	ENSMUSG00000027315.13	12165	30	75	10	46		26	75	6	46	4	75	4	46		34.6668	13.0437	-1.4102	-21.6231		5.33346	8.69585	0.705256	3.36239		0	0	0	0
chr2	119288740	119298453	+	Vps18	ENSMUSG00000034216.12	9713	174	810	142	807		156	810	127	807	18	810	15	807		19.2593	15.7373	-0.291364	-3.52196		2.22223	1.85875	-0.25768	-0.363486		1	0.102955	2.74955	0.283079
chr2	119373042	119477687	-	Ino80	ENSMUSG00000034154.15	104645	3854	17697	4170	18703		325	17697	352	18703	3529	17697	3818	18703		1.83647	1.88205	0.0353708	0.0455815		19.9412	20.4138	0.0337928	0.472604		0	0	0	0
chr2	119547697	119587027	+	Chp1	ENSMUSG00000014077.13	39330	658	3929	478	3777		624	3929	454	3777	34	3929	24	3777		15.8819	12.0201	-0.401932	-3.86178		0.865363	0.635428	-0.445577	-0.229935		0	0	0	0
chr2	119594297	119607502	+	1700020I14Rik	ENSMUSG00000085438.1	13205	704	2208	861	2512		664	2208	811	2512	40	2208	50	2512		30.0725	32.285	0.102422	2.21257		1.8116	1.99045	0.135831	0.178851		0	0	0	0
chr2	119609512	119618469	-	Oip5	ENSMUSG00000072980.3	8957	300	797	422	1080		25	797	23	1080	275	797	399	1080		3.13678	2.12964	-0.558673	-1.00714		34.5044	36.9445	0.0985773	2.44005		0	0	0	0
chr2	119618298	119651244	+	Nusap1	ENSMUSG00000027306.15	32946	5099	8801	6683	11898		5017	8801	6562	11898	82	8801	121	11898		57.0049	55.1521	-0.0476691	-1.85276		0.931713	1.01698	0.126331	0.085265		1	0.0303527	2.53844	0.0770485
chr2	119655446	119662827	-	Ndufaf1	ENSMUSG00000027305.9	7381	236	695	255	690		28	695	27	690	208	695	228	690		4.02879	3.91306	-0.0420506	-0.115733		29.9281	33.0435	0.142867	3.11542		0	0	0	0
chr2	119675068	119735407	+	Rtf1	ENSMUSG00000027304.9	60339	2413	10096	2974	11886		2240	10096	2768	11886	173	10096	206	11886		22.187	23.2879	0.0698657	1.1009		1.71355	1.73313	0.0163927	0.0195813		2	0.0331461	6.15402	0.101991
chr2	119742337	119751263	+	Itpka	ENSMUSG00000027296.7	8926	29	148	39	258		27	148	36	258	2	148	3	258		18.2433	13.9535	-0.386737	-4.28978		1.35142	1.16283	-0.216835	-0.188589		1	0.112032	2.69292	0.301694
chr2	119763304	119787537	-	Rpap1	ENSMUSG00000034032.15	24233	1170	2014	1415	2380		127	2014	130	2380	1043	2014	1285	2380		6.30586	5.46219	-0.207215	-0.843675		51.7875	53.9916	0.0601313	2.20411		1	0.041266	2.50299	0.103288
chr2	119797733	119818104	+	Tyro3	ENSMUSG00000027298.17	20371	73	164	27	79		68	164	26	79	5	164	1	79		41.4635	32.9115	-0.333249	-8.55197		3.04884	1.26595	-1.26804	-1.78289		0	0	0	0
chr2	119897228	119969581	+	Mga	ENSMUSG00000033943.15	72353	4041	16028	3957	15926		3668	16028	3608	15926	373	16028	349	15926		22.885	22.6548	-0.0145838	-0.230173		2.32718	2.19139	-0.0867381	-0.135792		0	0	0	0
chr2	119972699	120027408	+	Mapkbp1	ENSMUSG00000033902.12	54709	341	1248	513	1627		291	1248	445	1627	50	1248	68	1627		23.3173	27.351	0.23019	4.03364		4.00642	4.17948	0.0610096	0.173059		1	0.0182785	2.53475	0.0463315
chr2	120027483	120032594	+	Jmjd7	ENSMUSG00000098789.7	5111	213	282	169	244		172	282	137	244	41	282	32	244		60.9929	56.1476	-0.119419	-4.84536		14.539	13.1148	-0.148737	-1.42425		0	0	0	0
chr2	120027493	120043033	+	Gm28042	ENSMUSG00000033852.16	15540	89	101	82	101		71	101	82	101	18	101	0	101		70.2971	81.1881	0.207805	10.8911		17.8219	9.90098e-05	-17.4576	-17.8218		0	0	0	0
chr2	120033417	120043030	+	Pla2g4b	ENSMUSG00000098488.7	9613	44	116	25	66		31	116	16	66	13	116	9	66		26.7242	24.2425	-0.140606	-2.48166		11.207	13.6365	0.283076	2.42952		0	0	0	0
chr2	120041493	120085693	-	Sptbn5	ENSMUSG00000074899.5	44200	26	117	23	117		16	117	15	117	10	117	8	117		13.6753	12.8206	-0.0931088	-0.8547		8.54709	6.83769	-0.321924	-1.7094		1	0.0226244	2.63843	0.059693
chr2	120089175	120154606	-	Ehd4	ENSMUSG00000027293.13	65431	159	1379	158	1713		14	1379	14	1713	145	1379	144	1713		1.01524	0.817285	-0.312903	-0.19795		10.5149	8.40631	-0.322887	-2.10856		3	0.0458498	7.6573	0.117029
chr2	120299957	120314165	-	Pla2g4f	ENSMUSG00000046971.7	14208	50	162	18	74		10	162	6	74	40	162	12	74		6.1729	8.10823	0.39344	1.93533		24.6914	16.2163	-0.606562	-8.47508		0	0	0	0
chr2	120316461	120353137	-	Vps39	ENSMUSG00000027291.15	36676	2517	7020	3046	7732		393	7020	458	7732	2124	7020	2588	7732		5.59829	5.92344	0.0814476	0.325144		30.2564	33.4713	0.145683	3.21488		0	0	0	0
chr2	120355312	120404113	-	Tmem87a	ENSMUSG00000033808.16	48801	6759	25141	6792	25009		760	25141	783	25009	5999	25141	6009	25009		3.02295	3.13087	0.0506075	0.107922		23.8614	24.0274	0.00999755	0.165929		1	0.0204914	2.79879	0.0573511
chr2	120403896	120461700	+	Ganc	ENSMUSG00000062646.12	57804	1149	3556	1351	4585		970	3556	1134	4585	179	3556	217	4585		27.2778	24.7328	-0.141302	-2.54502		5.03375	4.73283	-0.0889311	-0.300922		2	0.0345997	5.9209	0.102431
chr2	120456019	120504913	+	Capn3	ENSMUSG00000079110.11	48894	3444	7412	1213	2946		3025	7412	1076	2946	419	7412	137	2946		40.8122	36.5241	-0.160152	-4.28809		5.653	4.65038	-0.281668	-1.00262		0	0	0	0
chr2	120506820	120563843	-	Zfp106	ENSMUSG00000027288.16	57023	3525	8503	3262	7810		390	8503	407	7810	3135	8503	2855	7810		4.58662	5.21127	0.184204	0.624651		36.8693	36.5557	-0.0123253	-0.313642		1	0.0175368	3.05914	0.0536475
chr2	120567671	120601255	+	Snap23	ENSMUSG00000027287.14	33584	1594	5563	1528	5122		1419	5563	1350	5122	175	5563	178	5122		25.5078	26.3569	0.0472407	0.849072		3.14579	3.47521	0.143678	0.32942		0	0	0	0
chr2	120604238	120609520	-	Lrrc57	ENSMUSG00000027286.16	5282	318	943	257	741		77	943	72	741	241	943	185	741		8.16544	9.71661	0.250923	1.55117		25.5567	24.9663	-0.0337235	-0.59047		0	0	0	0
chr2	120609383	120621560	+	Haus2	ENSMUSG00000027285.13	12177	410	1176	476	1245		369	1176	436	1245	41	1176	40	1245		31.3776	35.0201	0.15845	3.64253		3.4864	3.21286	-0.117881	-0.273544		0	0	0	0
chr2	120629121	120731895	+	Stard9	ENSMUSG00000033705.17	102774	237	683	218	690		167	683	142	690	70	683	76	690		24.451	20.5797	-0.248668	-3.87124		10.2489	11.0145	0.103934	0.765591		4	0.0389203	10.5598	0.102748
chr2	120716154	120850128	-	Cdan1	ENSMUSG00000027284.16	133974	2720	4495	3041	5014		444	4495	511	5014	2276	4495	2530	5014		9.87764	10.1915	0.0451227	0.313822		50.634	50.4587	-0.00500406	-0.175322		0	0	0	0
chr2	120732816	120850604	-	Ttbk2	ENSMUSG00000090100.7	117788	132	1148	110	848		54	1148	46	848	78	1148	64	848		4.70384	5.42454	0.205661	0.720698		6.79443	7.54718	0.151585	0.752748		0	0	0	0
chr2	120850705	120866689	+	AV039307	ENSMUSG00000087519.8	15984	24	70	16	43		7	70	8	43	17	70	8	43		10.0001	18.6048	0.895659	8.60471		24.2858	18.6048	-0.384436	-5.68098		0	0	0	0
chr2	120860269	120970715	-	Ubr1	ENSMUSG00000027272.5	110446	6194	22867	6206	21702		634	22867	599	21702	5560	22867	5607	21702		2.77255	2.76011	-0.00648772	-0.01244		24.3145	25.8363	0.0875833	1.52181		0	0	0	0
chr2	120977017	121007852	+	Tmem62	ENSMUSG00000054484.14	30835	231	1284	270	1370		185	1284	214	1370	46	1284	56	1370		14.4081	15.6204	0.116555	1.21234		3.58256	4.0876	0.190262	0.505036		0	0	0	0
chr2	121008403	121016904	+	Ccndbp1	ENSMUSG00000023572.16	8501	1980	2994	2006	3012		1821	2994	1842	3012	159	2994	164	3012		60.8216	61.1554	0.00789459	0.333735		5.31062	5.44489	0.0360215	0.134266		2	0.235266	5.65832	0.665606
chr2	121140428	121156680	+	Adal	ENSMUSG00000027259.15	16252	627	1549	630	1549		572	1549	574	1549	55	1549	56	1549		36.9271	37.0562	0.00503559	0.129116		3.55068	3.61524	0.0259952	0.0645578		1	0.0615309	2.60353	0.160198
chr2	121158273	121171125	-	Zscan29	ENSMUSG00000050619.14	12852	363	1734	437	1869		102	1734	117	1869	261	1734	320	1869		5.88236	6.26004	0.0897765	0.377679		15.0519	17.1215	0.185859	2.06955		0	0	0	0
chr2	121170654	121198770	+	Tubgcp4	ENSMUSG00000027263.12	28116	1770	5183	1912	5501		1464	5183	1578	5501	306	5183	334	5501		28.2462	28.6857	0.0222751	0.439504		5.90392	6.07163	0.0404099	0.167707		1	0.0355669	2.60353	0.0925996
chr2	121193281	121271407	-	Trp53bp1	ENSMUSG00000043909.16	78126	1876	7039	2161	7775		362	7039	445	7775	1514	7039	1716	7775		5.14278	5.72347	0.154343	0.580697		21.5087	22.0707	0.0372121	0.562002		2	0.0255997	5.33216	0.0682508
chr2	121310561	121355396	-	Ppip5k1	ENSMUSG00000033526.16	44835	389	954	516	1221		36	954	48	1221	353	954	468	1221		3.77359	3.93121	0.0590345	0.157617		37.0021	38.3292	0.0508382	1.32714		1	0.022304	2.61636	0.0583553
chr2	121392631	121413792	-	Catsper2	ENSMUSG00000033486.14	21161	62	242	50	240		15	242	17	240	47	242	33	240		6.19839	7.08337	0.192544	0.884986		19.4215	13.75	-0.498221	-5.67148		0	0	0	0
chr2	121413775	121438687	+	Pdia3	ENSMUSG00000027248.13	24912	8323	12585	9465	14143		8109	12585	9253	14143	214	12585	212	14143		64.4339	65.4246	0.0220142	0.990742		1.70044	1.49898	-0.181929	-0.201462		0	0	0	0
chr2	121439059	121456781	-	Serinc4	ENSMUSG00000046110.15	17722	752	2798	788	3040		448	2798	458	3040	304	2798	330	3040		16.0114	15.0658	-0.0878265	-0.945647		10.8649	10.8553	-0.00128069	-0.0096406		0	0	0	0
chr2	121449195	121458313	+	Serf2	ENSMUSG00000074884.12	9118	3359	3422	3322	3365		3346	3422	3317	3365	13	3422	5	3365		97.7791	98.5736	0.0116748	0.794475		0.379898	0.148591	-1.35426	-0.231306		1	0.109673	2.50755	0.275011
chr2	121453290	121458672	+	Hypk	ENSMUSG00000027245.11	5382	526	637	583	701		515	637	571	701	11	637	12	701		80.8477	81.4551	0.0107972	0.60734		1.72686	1.71185	-0.0125913	-0.0150058		1	0.185805	2.50755	0.465914
chr2	121460235	121474067	-	Mfap1b	ENSMUSG00000048222.3	13832	187	1022	43	765		2	1022	0	765	185	1022	43	765		0.195704	1.30719e-05	-13.8699	-0.195691		18.1018	5.62093	-1.68725	-12.4808		0	0	0	0
chr2	121485432	121491512	+	Gm14018	ENSMUSG00000084407.1	6080	75	348	67	353		71	348	58	353	4	348	9	353		20.4023	16.4306	-0.312347	-3.9717		1.14945	2.5496	1.14932	1.40015		0	0	0	0
chr2	121491911	121506665	-	Mfap1a	ENSMUSG00000068479.5	14754	37	940	36	860		4	940	5	860	33	940	31	860		0.425543	0.581407	0.450245	0.155864		3.51065	3.60466	0.0381266	0.0940138		0	0	0	0
chr2	121506723	121544860	+	Wdr76	ENSMUSG00000027242.14	38137	1960	6217	2671	8084		1793	6217	2414	8084	167	6217	257	8084		28.8403	29.8615	0.0501994	1.02118		2.68618	3.17912	0.243069	0.492936		1	0.0262213	2.7337	0.071681
chr2	121545529	121807087	-	Frmd5	ENSMUSG00000027238.17	261558	14	193	50	723		7	193	19	723	7	193	31	723		3.62699	2.62795	-0.464835	-0.99904		3.62699	4.2877	0.241431	0.66071		2	0.00764649	5.79285	0.0221475
chr2	121866970	121936220	+	Casc4	ENSMUSG00000060227.15	69250	615	3842	813	4749		539	3842	747	4749	76	3842	66	4749		14.0292	15.7296	0.165057	1.70048		1.97814	1.38977	-0.509299	-0.588371		0	0	0	0
chr2	121956001	122013642	+	Ctdspl2	ENSMUSG00000033411.16	57641	2661	11926	2794	14222		2463	11926	2598	14222	198	11926	196	14222		20.6524	18.2675	-0.177029	-2.38488		1.66024	1.37815	-0.268661	-0.282092		1	0.0173488	2.53844	0.0440388
chr2	122028546	122056598	+	Eif3j1	ENSMUSG00000027236.8	28052	1395	4806	1566	4906		1306	4806	1468	4906	89	4806	98	4906		27.1744	29.9225	0.138986	2.74818		1.85185	1.99756	0.109266	0.145702		0	0	0	0
chr2	122053520	122118386	-	Spg11	ENSMUSG00000033396.13	64866	2728	7410	3264	8143		284	7410	298	8143	2444	7410	2966	8143		3.83266	3.65959	-0.0666655	-0.173074		32.9825	36.4239	0.143187	3.44147		2	0.0308328	5.4674	0.0842876
chr2	122120108	122186189	-	Patl2	ENSMUSG00000027233.4	66081	64	143	39	105		16	143	10	105	48	143	29	105		11.1889	9.5239	-0.232441	-1.66498		33.5665	27.6191	-0.281354	-5.94736		3	0.0453988	8.60092	0.130157
chr2	122147686	122153083	+	B2m	ENSMUSG00000060802.8	5397	8475	12095	13079	18339		8328	12095	12858	18339	147	12095	221	18339		68.8549	70.1129	0.0261201	1.25798		1.21538	1.20508	-0.0122743	-0.0102965		2	0.370576	5.73236	1.06214
chr2	122160700	122179027	+	Trim69	ENSMUSG00000033368.8	18327	4	68	14	124		3	68	8	124	1	68	6	124		4.41191	6.45169	0.548275	2.03978		1.47073	4.83879	1.71811	3.36805		1	0.0545643	2.86856	0.156521
chr2	122234749	122265340	+	Sord	ENSMUSG00000027227.7	30591	578	1753	888	3000		559	1753	848	3000	19	1753	40	3000		31.8882	28.2667	-0.173921	-3.62153		1.08386	1.33334	0.29886	0.249475		0	0	0	0
chr2	122315672	122347972	+	Duox1	ENSMUSG00000033268.8	32300	39	151	42	141		20	151	29	141	19	151	13	141		13.2451	20.5674	0.634904	7.32234		12.5828	9.21992	-0.448631	-3.36292		0	0	0	0
chr2	122348892	122369162	-	Shf	ENSMUSG00000033256.14	20270	230	1849	183	1615		38	1849	43	1615	192	1849	140	1615		2.05517	2.66254	0.373548	0.607374		10.384	8.66874	-0.260468	-1.71526		0	0	0	0
chr2	122426477	122461137	+	Slc28a2	ENSMUSG00000027219.13	34660	3393	7803	1998	4426		3037	7803	1795	4426	356	7803	203	4426		38.9209	40.5558	0.0593624	1.63488		4.56235	4.58654	0.00762823	0.0241872		2	0.0577034	5.40231	0.155866
chr2	122427194	122427469	+	Gm14086	ENSMUSG00000083645.1	275	64	70	57	65		39	70	36	65	25	70	21	65		55.7143	55.3847	-0.00856186	-0.329665		35.7144	32.3078	-0.144623	-3.40658		0	0	0	0
chr2	122484941	122528040	+	Gm14085	ENSMUSG00000079071.2	43099	1126	4978	169	798		1032	4978	154	798	94	4978	15	798		20.7312	19.2983	-0.103334	-1.43296		1.88831	1.87971	-0.00658475	-0.00859898		0	0	0	0
chr2	122594467	122611303	-	Gatm	ENSMUSG00000027199.14	16836	45	74	31	47		1	74	3	47	44	74	28	47		1.35148	6.38318	2.23973	5.03169		59.4595	59.5746	0.00278857	0.11504		1	0.0593965	2.919	0.173378
chr2	122630625	122632930	+	Spata5l1	ENSMUSG00000074876.5	2305	95	304	66	222		77	304	56	222	18	304	10	222		25.329	25.2253	-0.00591944	-0.103713		5.92108	4.50455	-0.394479	-1.41654		2	0.867679	5.53249	2.40021
chr2	122636986	122641191	+	AA467197	ENSMUSG00000033213.16	4205	46	80	13	21		45	80	11	21	1	80	2	21		56.2501	52.3812	-0.102806	-3.86888		1.25012	9.52424	2.92953	8.27412		1	0.237812	2.66861	0.634628
chr2	122681233	122702663	-	Slc30a4	ENSMUSG00000005802.12	21430	1107	3537	587	1607		57	3537	31	1607	1050	3537	556	1607		1.61154	1.92907	0.259465	0.317528		29.6862	34.5986	0.220924	4.91246		2	0.0933271	7.15666	0.333955
chr2	122702047	122721456	+	4930417H01Rik	ENSMUSG00000087017.7	19409	153	794	65	346		22	794	8	346	131	794	57	346		2.77079	2.31217	-0.261053	-0.458626		16.4988	16.474	-0.00216482	-0.0247385		0	0	0	0
chr2	122733290	122738362	-	Bloc1s6os	ENSMUSG00000085633.1	5072	10	79	4	41		1	79	0	41	9	79	4	41		1.26595	0.000243902	-12.3416	-1.2657		11.3925	9.75632	-0.223678	-1.6362		0	0	0	0
chr2	122738503	122749475	+	Bloc1s6	ENSMUSG00000005804.14	10972	459	1875	476	1666		381	1875	389	1666	78	1875	87	1666		20.32	23.3493	0.200481	3.02934		4.16001	5.22209	0.328043	1.06209		0	0	0	0
chr2	122765237	122809569	+	Sqor	ENSMUSG00000005803.14	44332	730	2682	303	898		665	2682	276	898	65	2682	27	898		24.7949	30.735	0.309836	5.94004		2.42357	3.00669	0.311045	0.583124		1	0.0225571	2.66861	0.060196
chr2	124089969	124667770	+	Sema6d	ENSMUSG00000027200.17	577801	84	993	120	1254		67	993	97	1254	17	993	23	1254		6.74724	7.73525	0.197151	0.988015		1.71199	1.83414	0.0994252	0.122145		0	0	0	0
chr2	125068124	125088677	+	Slc24a5	ENSMUSG00000035183.14	20553	85	1105	96	1206		59	1105	79	1206	26	1105	17	1206		5.33938	6.55059	0.294954	1.21121		2.35295	1.40963	-0.739157	-0.943323		0	0	0	0
chr2	125084628	125123661	-	Myef2	ENSMUSG00000027201.16	39033	2823	13338	3521	15300		720	13338	817	15300	2103	13338	2704	15300		5.39811	5.33987	-0.0156501	-0.0582415		15.767	17.6732	0.164657	1.90622		0	0	0	0
chr2	125247190	125258608	+	Dut	ENSMUSG00000027203.15	11418	6258	10201	6419	14097		6041	10201	6152	14097	217	10201	267	14097		59.2197	43.6405	-0.440409	-15.5792		2.12724	1.89402	-0.167533	-0.233223		0	0	0	0
chr2	125300594	125507993	-	Fbn1	ENSMUSG00000027204.13	207399	80	194	34	116		7	194	6	116	73	194	28	116		3.6083	5.1725	0.519542	1.5642		37.6289	24.138	-0.640535	-13.4909		1	0.00482162	2.58325	0.0124555
chr2	125563088	125625113	-	Cep152	ENSMUSG00000068394.4	62025	1929	8166	2597	10778		191	8166	322	10778	1738	8166	2275	10778		2.33897	2.98757	0.3531	0.648601		21.2834	21.1078	-0.0119496	-0.175558		0	0	0	0
chr2	125627447	125724148	-	Shc4	ENSMUSG00000035109.14	96701	204	5433	344	7323		190	5433	289	7323	14	5433	55	7323		3.49715	3.94647	0.174384	0.449322		0.257686	0.75106	1.54331	0.493373		1	0.0103412	2.66861	0.0275965
chr2	125736986	125782870	-	Secisbp2l	ENSMUSG00000035093.16	45884	2094	7856	2687	9550		218	7856	263	9550	1876	7856	2424	9550		2.77495	2.75393	-0.0109712	-0.0210226		23.8798	25.3822	0.0880241	1.50236		1	0.0217941	2.53844	0.055323
chr2	125830304	125859139	-	Cops2	ENSMUSG00000027206.13	28835	3528	8396	4024	9173		173	8396	204	9173	3355	8396	3820	9173		2.06051	2.22392	0.110106	0.163413		39.9595	41.644	0.0595684	1.68445		0	0	0	0
chr2	125859109	125984299	+	Galk2	ENSMUSG00000027207.15	125190	763	12129	970	12439		668	12129	877	12439	95	12129	93	12439		5.50746	7.05041	0.356319	1.54294		0.783248	0.747649	-0.0671067	-0.0355983		0	0	0	0
chr2	125983483	126152004	-	Fam227b	ENSMUSG00000027209.17	168521	40	664	37	674		31	664	27	674	9	664	10	674		4.66869	4.00595	-0.220873	-0.66274		1.35544	1.48369	0.130436	0.128258		2	0.011868	5.29226	0.0314042
chr2	126034658	126091185	+	Fgf7	ENSMUSG00000027208.14	56527	2	76	0	70		2	76	0	70	0	76	0	70		2.63171	0.000142857	-14.1691	-2.63156		0.000131579	0.000142857	0.118644	1.12782e-05		1	0.0176907	2.75382	0.0487169
chr2	126152141	126165279	+	Dtwd1	ENSMUSG00000023330.12	13138	112	651	91	643		84	651	78	643	28	651	13	643		12.9032	12.1307	-0.0890763	-0.772588		4.30109	2.02179	-1.08907	-2.2793		1	0.0761151	2.53844	0.193214
chr2	126320973	126500674	-	Atp8b4	ENSMUSG00000060131.11	179701	1271	11039	891	8061		131	11039	105	8061	1140	11039	786	8061		1.1867	1.30257	0.134402	0.115867		10.327	9.75065	-0.0828538	-0.576371		1	0.0055648	2.53844	0.0141259
chr2	126552407	126588243	+	Slc27a2	ENSMUSG00000027359.16	35836	22	91	18	48		18	91	14	48	4	91	4	48		19.7803	29.1668	0.560263	9.38651		4.39571	8.33352	0.922831	3.93781		0	0	0	0
chr2	126593667	126619299	-	Hdc	ENSMUSG00000027360.5	25632	31	105	32	143		5	105	8	143	26	105	24	143		4.762	5.59447	0.232436	0.832476		24.762	16.7833	-0.561102	-7.9787		1	0.0390137	2.60353	0.101573
chr2	126627442	126676337	-	Gabpb1	ENSMUSG00000027361.15	48895	1339	13373	1295	14491		173	13373	161	14491	1166	13373	1134	14491		1.29365	1.11104	-0.219545	-0.182617		8.71906	7.82555	-0.155981	-0.893514		0	0	0	0
chr2	126707328	126759297	+	Usp8	ENSMUSG00000027363.15	51969	1700	6257	2010	7045		1541	6257	1825	7045	159	6257	185	7045		24.6284	25.9049	0.072901	1.27648		2.54116	2.62598	0.0473698	0.0848218		0	0	0	0
chr2	126709096	126783470	-	Usp50	ENSMUSG00000027364.14	74374	10	432	10	450		7	432	10	450	3	432	0	450		1.62039	2.22224	0.455673	0.601851		0.694467	2.22222e-05	-14.9316	-0.694445		1	0.0134456	2.99405	0.0402567
chr2	126791565	126876230	-	Trpm7	ENSMUSG00000027365.14	84665	7786	19898	9407	23060		536	19898	650	23060	7250	19898	8757	23060		2.69374	2.81873	0.0654376	0.124996		36.4358	37.9748	0.0596866	1.53903		0	0	0	0
chr2	126890391	126933235	-	Sppl2a	ENSMUSG00000027366.12	42844	2882	5561	4238	7258		126	5561	161	7258	2756	5561	4077	7258		2.26578	2.21824	-0.030591	-0.047538		49.5594	56.1725	0.180704	6.61307		0	0	0	0
chr2	127008717	127067909	+	Ap4e1	ENSMUSG00000001998.15	59192	1536	5087	1913	5634		1353	5087	1729	5634	183	5087	184	5634		26.5972	30.6887	0.206432	4.09147		3.59741	3.26589	-0.139482	-0.33152		1	0.0168942	2.75382	0.0465235
chr2	127070665	127097084	+	Blvra	ENSMUSG00000001999.15	26419	755	1710	574	1411		735	1710	559	1411	20	1710	15	1411		42.9825	39.6173	-0.117618	-3.36516		1.1696	1.06308	-0.137757	-0.106514		2	0.0757031	5.5325	0.209414
chr2	127103809	127133954	-	Ncaph	ENSMUSG00000034906.15	30145	3989	7661	6144	11689		207	7661	282	11689	3782	7661	5862	11689		2.702	2.41253	-0.163483	-0.289473		49.3669	50.1497	0.0226967	0.78279		0	0	0	0
chr2	127138772	127143442	-	Itpripl1	ENSMUSG00000074825.4	4670	141	605	153	695		60	605	57	695	81	605	96	695		9.91737	8.20145	-0.274078	-1.71592		13.3884	13.813	0.0450344	0.424518		1	0.214133	2.87518	0.61567
chr2	127186355	127208280	-	1810024B03Rik	ENSMUSG00000044145.2	21925	25	461	22	459		4	461	5	459	21	461	17	459		0.8677	1.08935	0.328193	0.221646		4.55534	3.70372	-0.29858	-0.851611		0	0	0	0
chr2	127208386	127240451	+	Snrnp200	ENSMUSG00000003660.10	32065	13756	17582	16417	20213		13299	17582	15972	20213	457	17582	445	20213		75.6399	79.0185	0.0630429	3.37859		2.59925	2.20155	-0.239573	-0.397696		0	0	0	0
chr2	127240938	127247816	-	Ciao1	ENSMUSG00000003662.10	6878	1792	2447	1629	2240		102	2447	76	2240	1690	2447	1553	2240		4.16837	3.39286	-0.296982	-0.775512		69.0642	69.3304	0.00554995	0.266197		0	0	0	0
chr2	127247908	127261107	+	Tmem127	ENSMUSG00000034850.15	13199	412	4176	435	4282		350	4176	367	4282	62	4176	68	4282		8.38123	8.57076	0.032262	0.189535		1.48468	1.58805	0.0971032	0.103369		0	0	0	0
chr2	127270218	127298932	+	Stard7	ENSMUSG00000027367.16	28714	1078	3716	1201	4013		863	3716	921	4013	215	3716	280	4013		23.2239	22.9504	-0.0170901	-0.273486		5.78579	6.97733	0.270159	1.19153		0	0	0	0
chr2	127336159	127338376	+	Dusp2	ENSMUSG00000027368.6	2217	717	754	641	662		618	754	565	662	99	754	76	662		81.9629	85.3474	0.0583773	3.38457		13.13	11.4804	-0.193695	-1.64961		0	0	0	0
chr2	127338639	127357651	+	Astl	ENSMUSG00000050468.12	19012	26	208	18	190		11	208	5	190	15	208	13	190		5.28851	2.63163	-1.0069	-2.65688		7.21158	6.84215	-0.0758654	-0.369429		1	0.0525984	2.80462	0.147518
chr2	127425199	127436092	+	Gpat2	ENSMUSG00000046338.4	10893	339	780	252	558		202	780	137	558	137	780	115	558		25.8974	24.552	-0.0769701	-1.34546		17.5641	20.6093	0.230667	3.04522		0	0	0	0
chr2	127436215	127444565	-	Fahd2a	ENSMUSG00000027371.10	8350	384	1506	348	1343		86	1506	79	1343	298	1506	269	1343		5.7105	5.88236	0.0427786	0.171862		19.7875	20.0298	0.0175563	0.242268		0	0	0	0
chr2	127456498	127522094	-	Kcnip3	ENSMUSG00000079056.12	65596	29	723	8	244		3	723	0	244	26	723	8	244		0.414952	4.09836e-05	-13.3056	-0.414911		3.59614	3.27873	-0.133313	-0.317412		6	0.091469	16.7218	0.254921
chr2	127574662	127587094	-	Zfp661	ENSMUSG00000034800.15	12432	36	208	53	253		10	208	6	253	26	208	47	253		4.80774	2.37158	-1.01951	-2.43616		12.5	18.5771	0.571593	6.07707		0	0	0	0
chr2	127587222	127606829	+	Mrps5	ENSMUSG00000027374.12	19607	1555	2708	2505	4101		1467	2708	2389	4101	88	2708	116	4101		54.1728	58.2541	0.10479	4.08126		3.24963	2.82858	-0.200199	-0.421054		0	0	0	0
chr2	127740732	127788897	-	Nphp1	ENSMUSG00000027378.16	48165	419	918	598	1265		15	918	27	1265	404	918	571	1265		1.634	2.1344	0.385421	0.500397		44.0087	45.1383	0.0365641	1.12962		1	0.020762	2.60353	0.0540544
chr2	127791388	127792488	-	Mtln	ENSMUSG00000051319.6	1100	31	50	16	33		1	50	0	33	30	50	16	33		2.0002	0.000303029	-12.6884	-1.99989		60.0001	48.485	-0.307426	-11.5151		0	0	0	0
chr2	127801122	127831865	-	Bub1	ENSMUSG00000027379.13	30743	3306	6041	4931	9056		207	6041	358	9056	3099	6041	4573	9056		3.42659	3.95318	0.206242	0.526595		51.2995	50.4969	-0.0227484	-0.802546		0	0	0	0
chr2	127838876	128123873	+	Acoxl	ENSMUSG00000027380.10	284997	95	2245	267	5044		85	2245	244	5044	10	2245	23	5044		3.7862	4.83743	0.353493	1.05124		0.445439	0.455989	0.0337729	0.0105506		6	0.0210529	16.4527	0.0577295
chr2	128126038	128162547	+	Bcl2l11	ENSMUSG00000027381.16	36509	449	6801	471	7650		360	6801	383	7650	89	6801	88	7650		5.29334	5.00654	-0.0803654	-0.286803		1.30863	1.15033	-0.186015	-0.158304		1	0.0273905	2.58921	0.0709198
chr2	128178319	128502765	-	Gm14005	ENSMUSG00000074813.13	324446	11	436	26	623		3	436	11	623	8	436	15	623		0.688096	1.76567	1.35953	1.07757		1.83488	2.40772	0.391978	0.572835		11	0.0339039	29.4002	0.0906165
chr2	128610104	128687391	-	Anapc1	ENSMUSG00000014355.10	77287	9683	20154	10243	21939		688	20154	700	21939	8995	20154	9543	21939		3.41371	3.19067	-0.0974852	-0.223049		44.6313	43.4979	-0.037112	-1.13346		0	0	0	0
chr2	128698956	128802894	+	Mertk	ENSMUSG00000014361.5	103938	130	1758	155	1422		105	1758	137	1422	25	1758	18	1422		5.9727	9.63432	0.6898	3.66162		1.42208	1.26583	-0.167915	-0.156246		1	0.00962112	2.51061	0.0241549
chr2	128818118	128854261	+	Tmem87b	ENSMUSG00000014353.14	36143	2231	10714	1718	7776		1778	10714	1395	7776	453	10714	323	7776		16.5951	17.9398	0.112407	1.34471		4.22811	4.15381	-0.0255797	-0.0743058		1	0.0276679	2.62622	0.0726619
chr2	128926268	128944077	-	Zc3h8	ENSMUSG00000027387.11	17809	328	1521	301	1362		38	1521	54	1362	290	1521	247	1362		2.49836	3.96476	0.666252	1.4664		19.0664	18.1351	-0.0722483	-0.931308		1	0.0561514	2.66861	0.149846
chr2	128967402	129018563	+	Zc3h6	ENSMUSG00000042851.17	51161	288	4351	521	5763		255	4351	494	5763	33	4351	27	5763		5.86072	8.57193	0.548541	2.7112		0.758449	0.468508	-0.694979	-0.289941		0	0	0	0
chr2	129016952	129021756	+	Gm14027	ENSMUSG00000090248.1	4804	81	525	114	811		54	525	63	811	27	525	51	811		10.2857	7.7682	-0.404992	-2.51753		5.14288	6.28854	0.290151	1.14567		0	0	0	0
chr2	129025073	129048172	-	Gm14025	ENSMUSG00000079051.5	23099	24	191	20	289		11	191	12	289	13	191	8	289		5.75921	4.15228	-0.471967	-1.60693		6.80633	2.7682	-1.29793	-4.03813		0	0	0	0
chr2	129065942	129096283	+	Ttl	ENSMUSG00000027394.13	30341	128	920	186	1022		111	920	176	1022	17	920	10	1022		12.0652	17.2211	0.513326	5.15592		1.84784	0.978483	-0.917218	-0.869353		1	0.0329587	2.75382	0.0907623
chr2	129100995	129126594	+	Polr1b	ENSMUSG00000027395.15	25599	662	1429	779	1671		611	1429	718	1671	51	1429	61	1671		42.7572	42.9683	0.00710563	0.211109		3.56894	3.65051	0.0326057	0.0815784		0	0	0	0
chr2	129129700	129134134	+	Chchd5	ENSMUSG00000037938.4	4434	80	999	78	1007		56	999	57	1007	24	999	21	1007		5.60562	5.66039	0.0140279	0.0547717		2.40241	2.08541	-0.204151	-0.317		1	0.22553	2.66861	0.601852
chr2	129158666	129180667	-	AI847159	ENSMUSG00000084826.7	22001	79	289	100	347		32	289	38	347	47	289	62	347		11.0727	10.951	-0.0159393	-0.121661		16.263	17.8675	0.135741	1.60445		1	0.0454525	3.26369	0.148343
chr2	129182482	129183947	-	Gm14029	ENSMUSG00000086652.1	1465	125	129	116	114		30	129	30	114	95	129	86	114		23.2559	26.3159	0.178337	3.05998		73.6434	75.4386	0.0347464	1.79519		0	0	0	0
chr2	129198764	129211616	+	Slc20a1	ENSMUSG00000027397.14	12852	1507	3853	1616	3942		1349	3853	1413	3942	158	3853	203	3942		35.0117	35.8448	0.0339255	0.83307		4.1007	5.14967	0.328609	1.04897		1	0.0778089	2.7337	0.212706
chr2	129205958	129230579	-	9830144P21Rik	ENSMUSG00000087528.1	24621	9	72	7	54		9	72	7	54	0	72	0	54		12.5001	12.9631	0.0524713	0.463003		0.000138889	0.000185185	0.415037	4.62961e-05		1	0.0406157	2.7337	0.111031
chr2	129268210	129297212	-	Ckap2l	ENSMUSG00000048327.6	29002	1012	3285	1366	4709		47	3285	72	4709	965	3285	1294	4709		1.43075	1.52899	0.0958077	0.0982403		29.376	27.4793	-0.0962906	-1.89666		0	0	0	0
chr2	129297370	129307826	+	Gm14023	ENSMUSG00000085498.1	10456	14	102	11	83		12	102	8	83	2	102	3	83		11.7648	9.63866	-0.287571	-2.12613		1.96088	3.61457	0.882324	1.65369		0	0	0	0
chr2	129299610	129309972	-	Il1a	ENSMUSG00000027399.1	10362	9	66	15	57		3	66	2	57	6	66	13	57		4.5456	3.50894	-0.373435	-1.03666		9.09105	22.8072	1.32697	13.7161		0	0	0	0
chr2	129592835	129632228	+	Sirpa	ENSMUSG00000037902.18	39393	152	1490	178	1517		122	1490	139	1517	30	1490	39	1517		8.18793	9.16283	0.162295	0.974902		2.01343	2.57087	0.352602	0.557441		0	0	0	0
chr2	129800517	129832287	+	Stk35	ENSMUSG00000037885.18	31770	127	3624	123	4375		103	3624	87	4375	24	3624	36	4375		2.84217	1.98857	-0.515257	-0.853592		0.662254	0.822859	0.31326	0.160605		3	0.0944287	8.36228	0.263213
chr2	130171414	130179403	-	Snrpb	ENSMUSG00000027404.15	7989	3821	5545	4328	6149		152	5545	135	6149	3669	5545	4193	6149		2.74121	2.19548	-0.320276	-0.54573		66.1677	68.19	0.0434316	2.02223		0	0	0	0
chr2	130195194	130264445	+	Tmc2	ENSMUSG00000060332.9	69251	9	199	15	283		4	199	11	283	5	199	4	283		2.0101	3.88696	0.951375	1.87686		2.51261	1.41346	-0.829954	-1.09915		0	0	0	0
chr2	130274430	130279313	+	Nop56	ENSMUSG00000027405.16	4883	552	539	619	620		513	539	590	620	39	539	29	620		95.1763	95.1613	-0.000226816	-0.0149621		7.23564	4.67743	-0.629403	-2.5582		0	0	0	0
chr2	130279309	130284547	-	Idh3b	ENSMUSG00000027406.12	5238	3720	4029	4030	4291		171	4029	165	4291	3549	4029	3865	4291		4.24423	3.84526	-0.142422	-0.398972		88.0864	90.0722	0.0321637	1.98587		0	0	0	0
chr2	130417247	130424701	-	Pced1a	ENSMUSG00000037773.14	7454	92	484	125	587		12	484	20	587	80	484	105	587		2.47936	3.40717	0.458607	0.927812		16.5289	17.8876	0.113964	1.35864		1	0.134156	2.62095	0.351617
chr2	130424339	130444269	+	Vps16	ENSMUSG00000027411.17	19930	4687	5474	5365	6184		4216	5474	4850	6184	471	5474	515	6184		77.0186	78.4282	0.026165	1.40957		8.60431	8.32794	-0.0470995	-0.276368		1	0.0501756	2.62095	0.131508
chr2	130450278	130556124	+	Ptpra	ENSMUSG00000027303.18	105846	3154	18588	4603	21927		2861	18588	4245	21927	293	18588	358	21927		15.3917	19.3597	0.330908	3.96804		1.57629	1.63269	0.0507219	0.0564044		1	0.00944769	2.56261	0.0242107
chr2	130543791	130563749	-	4930473A02Rik	ENSMUSG00000060029.13	19958	77	782	94	889		46	782	54	889	31	782	40	889		5.88236	6.07425	0.0463103	0.191886		3.96421	4.49945	0.182716	0.535242		0	0	0	0
chr2	130563742	130568695	+	Mrps26	ENSMUSG00000037740.8	4953	413	635	537	675		402	635	526	675	11	635	11	675		63.3071	77.9259	0.299736	14.6188		1.7323	1.62964	-0.0881309	-0.102655		0	0	0	0
chr2	130590002	130630038	-	Ubox5	ENSMUSG00000027300.9	40036	163	2313	269	2141		32	2313	36	2141	131	2313	233	2141		1.38349	1.68146	0.281405	0.297973		5.66364	10.8828	0.942243	5.21912		2	0.049955	5.14197	0.128434
chr2	130632839	130642803	-	Lzts3	ENSMUSG00000037703.14	9964	41	132	41	116		13	132	6	116	28	132	35	116		9.84855	5.1725	-0.929051	-4.67606		21.2122	30.1725	0.50834	8.96029		0	0	0	0
chr2	130653960	130664659	-	Ddrgk1	ENSMUSG00000068290.11	10699	1225	2627	1294	2931		151	2627	195	2931	1074	2627	1099	2931		5.74801	6.65302	0.210949	0.905018		40.8831	37.4957	-0.124779	-3.3874		0	0	0	0
chr2	130667610	130681614	+	Itpa	ENSMUSG00000074797.11	14004	1162	2637	1274	2765		1079	2637	1195	2765	83	2637	79	2765		40.9177	43.2188	0.0789338	2.3011		3.14752	2.85715	-0.139641	-0.290373		0	0	0	0
chr2	130684113	130697519	-	Slc4a11	ENSMUSG00000074796.10	13406	50	88	28	56		24	88	6	56	26	88	22	56		27.2728	10.7144	-1.34791	-16.5584		29.5455	39.2858	0.411069	9.74029		1	0.0745935	2.62812	0.196041
chr2	130706200	130906406	-	4930402H24Rik	ENSMUSG00000027309.18	200206	1320	9127	1592	9569		199	9127	202	9569	1121	9127	1390	9569		2.18035	2.11098	-0.0466406	-0.0693607		12.2822	14.5261	0.242071	2.24383		4	0.0199794	10.5302	0.0525967
chr2	130873059	130906396	-	A730017L22Rik	ENSMUSG00000085566.1	33337	80	2805	90	2815		25	2805	22	2815	55	2805	68	2815		0.891269	0.781531	-0.189558	-0.109738		1.96079	2.41563	0.300968	0.454846		0	0	0	0
chr2	130906495	131030333	+	Atrn	ENSMUSG00000027312.14	123838	1954	11895	1739	10320		1774	11895	1581	10320	180	11895	158	10320		14.9138	15.3198	0.0387437	0.405938		1.51324	1.53101	0.0168401	0.017767		0	0	0	0
chr2	131069220	131086765	-	Siglec1	ENSMUSG00000027322.11	17545	37	86	46	71		5	86	6	71	32	86	40	71		5.81406	8.45083	0.539547	2.63677		37.2094	56.3381	0.598444	19.1287		0	0	0	0
chr2	131127280	131146321	+	Hspa12b	ENSMUSG00000074793.10	19041	30	114	48	187		21	114	33	187	9	114	15	187		18.4211	17.6471	-0.0619298	-0.774021		7.89482	8.02144	0.0229552	0.126622		1	0.0525183	2.53844	0.133314
chr2	131146324	131160081	-	1700037H04Rik	ENSMUSG00000027327.16	13757	199	529	262	654		19	529	31	654	180	529	231	654		3.5917	4.74008	0.400243	1.14838		34.0265	35.3211	0.0538729	1.29463		0	0	0	0
chr2	131170261	131187282	-	Spef1	ENSMUSG00000027329.9	17021	143	322	218	517		23	322	47	517	120	322	171	517		7.14289	9.09093	0.34792	1.94804		37.2671	33.0754	-0.172142	-4.19165		1	0.058751	2.55422	0.150063
chr2	131186949	131198497	+	Cdc25b	ENSMUSG00000027330.16	11548	2090	2754	4444	5759		1998	2754	4237	5759	92	2754	207	5759		72.549	73.5718	0.0201968	1.02278		3.3406	3.59438	0.105634	0.253777		1	0.0865951	2.56813	0.222387
chr2	131207078	131213514	+	Ap5s1	ENSMUSG00000068264.11	6436	49	158	47	143		39	158	35	143	10	158	12	143		24.6836	24.4756	-0.0122095	-0.208015		6.32917	8.39167	0.406941	2.0625		0	0	0	0
chr2	131234063	131248025	+	Mavs	ENSMUSG00000037523.13	13962	245	997	271	1054		202	997	217	1054	43	997	54	1054		20.2608	20.5882	0.0231303	0.327452		4.31295	5.12335	0.248413	0.8104		0	0	0	0
chr2	131262495	131299188	+	Pank2	ENSMUSG00000037514.17	36693	1637	17127	1579	17472		1366	17127	1305	17472	271	17127	274	17472		7.97571	7.46909	-0.09468	-0.506617		1.5823	1.56822	-0.0128893	-0.0140735		0	0	0	0
chr2	131298064	131352892	-	Rnf24	ENSMUSG00000048911.15	54828	33	559	35	638		10	559	13	638	23	559	22	638		1.78893	2.03763	0.1878	0.248707		4.11451	3.44829	-0.254838	-0.666216		1	0.0182389	2.60353	0.0474854
chr2	131298545	131299835	+	Gm14233	ENSMUSG00000086329.1	1290	131	456	140	470		15	456	22	470	116	456	118	470		3.28949	4.68087	0.508911	1.39138		25.4386	25.1064	-0.0189649	-0.332214		0	0	0	0
chr2	131491496	131525922	+	Smox	ENSMUSG00000027333.18	34426	198	2126	235	2147		157	2126	187	2147	41	2126	48	2147		7.38476	8.70983	0.238093	1.32507		1.92851	2.23568	0.213229	0.307173		1	0.0290478	2.99405	0.0869706
chr2	131909928	131938429	+	Prnp	ENSMUSG00000079037.9	28501	5	156	8	64		3	156	7	64	2	156	1	64		1.92314	10.9376	2.50777	9.0145		1.28211	1.56265	0.285473	0.280539		0	0	0	0
chr2	131989415	132030258	-	Rassf2	ENSMUSG00000027339.15	40843	1905	10029	1675	7916		152	10029	152	7916	1753	10029	1523	7916		1.51561	1.92016	0.341334	0.404557		17.4793	19.2395	0.138424	1.76021		4	0.097936	10.6275	0.260203
chr2	132052496	132145108	-	Slc23a2	ENSMUSG00000027340.15	92612	889	7713	814	6855		145	7713	120	6855	744	7713	694	6855		1.87994	1.75055	-0.102883	-0.129396		9.64605	10.124	0.0697685	0.477945		0	0	0	0
chr2	132239492	132247807	-	Tmem230	ENSMUSG00000027341.10	8315	121	821	120	926		48	821	44	926	73	821	76	926		5.84654	4.75163	-0.299161	-1.09491		8.89161	8.20735	-0.115527	-0.684253		0	0	0	0
chr2	132249162	132253314	-	Pcna	ENSMUSG00000027342.14	4152	7659	9507	9597	11652		250	9507	260	11652	7409	9507	9337	11652		2.62964	2.23138	-0.236932	-0.398265		77.9321	80.1322	0.0401647	2.20012		0	0	0	0
chr2	132253357	132261333	+	AV099323	ENSMUSG00000087377.1	7976	10	469	9	533		6	469	5	533	4	469	4	533		1.27934	0.938105	-0.447577	-0.341234		0.8529	0.750488	-0.184548	-0.102412		0	0	0	0
chr2	132263148	132312050	+	Cds2	ENSMUSG00000058793.14	48902	2574	11133	3087	13266		2315	11133	2740	13266	259	11133	347	13266		20.794	20.6543	-0.00972733	-0.139732		2.32642	2.61571	0.169092	0.289292		0	0	0	0
chr2	132337733	132385447	-	Prokr2	ENSMUSG00000050558.13	47714	3	69	1	18		0	69	1	18	3	69	0	18		0.000144927	5.55608	15.2265	5.55594		4.34796	0.000555552	-12.9341	-4.34741		1	0.0209582	2.66861	0.0559293
chr2	132490634	132524057	+	1700026D11Rik	ENSMUSG00000086379.7	33423	37	193	12	119		32	193	9	119	5	193	3	119		16.5804	7.5631	-1.13242	-9.01725		2.59072	2.52109	-0.0393075	-0.0696337		2	0.059839	5.26002	0.157377
chr2	132529082	132587729	-	Gpcpd1	ENSMUSG00000027346.15	58647	2755	13180	2731	13154		489	13180	452	13154	2266	13180	2279	13154		3.71017	3.43622	-0.110663	-0.27395		17.1927	17.3255	0.0111019	0.132812		0	0	0	0
chr2	132598195	132653068	+	AU019990	ENSMUSG00000074783.10	54873	2	157	2	150		2	157	2	150	0	157	0	150		1.27395	1.3334	0.065802	0.0594509		6.36942e-05	6.66666e-05	0.065802	2.9724e-06		3	0.0546717	7.92665	0.144454
chr2	132686931	132751055	+	Shld1	ENSMUSG00000044991.10	64124	59	386	45	293		48	386	39	293	11	386	6	293		12.4353	13.3106	0.0981405	0.875354		2.84977	2.04782	-0.476758	-0.801951		0	0	0	0
chr2	132804207	132816055	-	Trmt6	ENSMUSG00000037376.14	11848	370	1426	486	1652		53	1426	63	1652	317	1426	423	1652		3.7167	3.81357	0.0371193	0.0968684		22.23	25.6053	0.203935	3.37531		0	0	0	0
chr2	132816141	132844197	+	Mcm8	ENSMUSG00000027353.14	28056	469	1044	641	1429		432	1044	599	1429	37	1044	42	1429		41.3793	41.9174	0.0186404	0.538113		3.54407	2.93913	-0.270021	-0.604945		0	0	0	0
chr2	132846666	132866785	+	Crls1	ENSMUSG00000027357.16	20119	375	2039	534	2098		342	2039	499	2098	33	2039	35	2098		16.7729	23.7846	0.50389	7.01163		1.61845	1.66826	0.0437357	0.0498149		0	0	0	0
chr2	132868305	132880891	-	Lrrn4	ENSMUSG00000043110.2	12586	16	55	11	31		7	55	6	31	9	55	5	31		12.7274	19.3551	0.604772	6.62767		16.3638	16.1293	-0.0208227	-0.234486		0	0	0	0
chr2	132904389	132945906	-	Fermt1	ENSMUSG00000027356.8	41517	8	52	3	23		2	52	1	23	6	52	2	23		3.84634	4.34824	0.176946	0.501903		11.5386	8.69605	-0.40804	-2.84258		0	0	0	0
chr2	134594185	134644145	-	Tmx4	ENSMUSG00000034723.11	49960	184	1974	260	2105		35	1974	28	2105	149	1974	232	2105		1.77305	1.33017	-0.414625	-0.442884		7.54813	11.0214	0.546114	3.47325		0	0	0	0
chr2	134786067	135475258	+	Plcb1	ENSMUSG00000051177.16	689191	2	91	5	64		2	91	5	64	0	91	0	64		2.19791	7.81264	1.82968	5.61473		0.00010989	0.00015625	0.507794	4.63598e-05		0	0	0	0
chr2	135659011	136014593	+	Plcb4	ENSMUSG00000039943.16	355582	429	3114	270	1794		362	3114	244	1794	67	3114	26	1794		11.6249	13.6009	0.226481	1.97597		2.15158	1.44928	-0.570057	-0.702296		1	0.00281229	2.75382	0.00774454
chr2	135686174	135693154	-	Gm14211	ENSMUSG00000085709.1	6980	8	82	0	70		0	82	0	70	8	82	0	70		0.000121951	0.000142857	0.228269	2.09059e-05		9.75621	0.000142857	-16.0595	-9.75606		0	0	0	0
chr2	136873780	136891389	-	Mkks	ENSMUSG00000027274.16	17609	128	1060	117	916		37	1060	34	916	91	1060	83	916		3.49058	3.7118	0.0886546	0.221226		8.58491	9.06115	0.0778897	0.476231		0	0	0	0
chr2	136891218	137071950	+	Slx4ip	ENSMUSG00000027281.16	180732	353	12479	371	13343		263	12479	292	13343	90	12479	79	13343		2.10754	2.18841	0.0543248	0.0808727		0.721212	0.592071	-0.284653	-0.129141		0	0	0	0
chr2	137081456	137116644	-	Jag1	ENSMUSG00000027276.7	35188	61	240	15	66		8	240	2	66	53	240	13	66		3.33337	3.03045	-0.137451	-0.302924		22.0834	19.6971	-0.164977	-2.38627		0	0	0	0
chr2	138256565	138589292	+	Btbd3	ENSMUSG00000062098.11	332727	10	379	6	276		6	379	3	276	4	379	3	276		1.58314	1.08699	-0.542447	-0.496147		1.05544	1.08699	0.042504	0.0315573		0	0	0	0
chr2	139678178	139758581	+	Ism1	ENSMUSG00000074766.10	80403	2	122	3	167		2	122	2	167	0	122	1	167		1.63942	1.19766	-0.452967	-0.441761		8.19671e-05	0.598862	12.8349	0.59878		0	0	0	0
chr2	139833480	140066805	-	Tasp1	ENSMUSG00000039033.11	233325	719	23532	1848	55675		115	23532	306	55675	604	23532	1542	55675		0.488697	0.549618	0.169491	0.0609218		2.56672	2.76965	0.109776	0.202927		2	0.00857173	5.43793	0.0233062
chr2	140119883	140170564	-	Esf1	ENSMUSG00000045624.15	50681	823	3604	881	3847		80	3604	90	3847	743	3604	791	3847		2.21976	2.33949	0.07579	0.119729		20.616	20.5615	-0.00381934	-0.0545059		0	0	0	0
chr2	140152043	140153532	+	Gm17374	ENSMUSG00000078197.2	1489	13	194	23	199		13	194	23	199	0	194	0	199		6.70108	11.5578	0.786406	4.85675		5.15464e-05	5.02512e-05	-0.0367118	-1.29513e-06		0	0	0	0
chr2	140170649	140203689	+	Ndufaf5	ENSMUSG00000027384.6	33040	520	3563	506	3818		448	3563	439	3818	72	3563	67	3818		12.5737	11.4982	-0.129002	-1.07551		2.02077	1.75485	-0.20356	-0.265924		0	0	0	0
chr2	140395309	142392966	+	Macrod2	ENSMUSG00000068205.14	1997657	93	1713	73	1239		83	1713	70	1239	10	1713	3	1239		4.84531	5.64973	0.221593	0.804419		0.583777	0.242139	-1.26958	-0.341638		0	0	0	0
chr2	141230431	141286991	-	Macrod2os1	ENSMUSG00000086450.1	56560	1	58	0	13		1	58	0	13	0	58	0	13		1.72431	0.000769225	-11.1303	-1.72354		0.000172413	0.000769225	2.15753	0.000596811		0	0	0	0
chr2	142617474	142901531	-	Kif16b	ENSMUSG00000038844.10	284057	1507	10993	1972	12432		85	10993	98	12432	1422	10993	1874	12432		0.77322	0.788289	0.0278454	0.0150689		12.9355	15.074	0.220726	2.1385		0	0	0	0
chr2	143063039	143072853	+	Snrpb2	ENSMUSG00000008333.12	9814	1217	3241	1706	3150		1128	3241	1642	3150	89	3241	64	3150		34.8041	52.127	0.582774	17.3229		2.74607	2.03175	-0.434646	-0.71432		0	0	0	0
chr2	143915320	143943324	+	Dstn	ENSMUSG00000015932.8	28004	232	1191	208	1117		213	1191	188	1117	19	1191	20	1117		17.8841	16.8308	-0.0875765	-1.05333		1.59531	1.79052	0.166544	0.195213		0	0	0	0
chr2	143947395	144011263	-	Rrbp1	ENSMUSG00000027422.15	63868	1541	7818	1688	7808		192	7818	179	7808	1349	7818	1509	7808		2.45587	2.29252	-0.0993001	-0.163351		17.2551	19.3263	0.163549	2.07128		1	0.0156573	2.53844	0.0397451
chr2	144250123	144270906	-	Snx5	ENSMUSG00000027423.15	20783	4398	8436	4977	8960		408	8436	415	8960	3990	8436	4562	8960		4.83642	4.6317	-0.0623975	-0.204719		47.2973	50.9152	0.106338	3.61788		1	0.0481162	2.51946	0.121227
chr2	144270663	144281227	+	Mgme1	ENSMUSG00000027424.11	10564	141	483	216	693		115	483	163	693	26	483	53	693		23.8095	23.5209	-0.0175943	-0.288605		5.38304	7.64792	0.506646	2.26488		1	0.0946611	2.51946	0.238495
chr2	144368983	144407676	+	Kat14	ENSMUSG00000027425.18	38693	648	4368	780	4858		546	4368	675	4858	102	4368	105	4858		12.5	13.8946	0.152597	1.39461		2.33517	2.16139	-0.111569	-0.173782		0	0	0	0
chr2	144527718	144541995	+	Polr3f	ENSMUSG00000027427.13	14277	548	1364	549	1299		471	1364	484	1299	77	1364	65	1299		34.5308	37.2594	0.109722	2.72864		5.64517	5.00386	-0.173976	-0.641312		0	0	0	0
chr2	144542265	144550869	-	Rbbp9	ENSMUSG00000027428.9	8604	148	489	122	378		28	489	14	378	120	489	108	378		5.72599	3.70373	-0.628547	-2.02226		24.5399	28.5714	0.219445	4.03155		0	0	0	0
chr2	144556229	144590749	+	Sec23b	ENSMUSG00000027429.16	34520	3184	5438	3550	5573		2973	5438	3318	5573	211	5438	232	5573		54.6708	59.5371	0.123016	4.86622		3.8801	4.16293	0.101504	0.282825		0	0	0	0
chr2	144594054	144595366	+	Smim26	ENSMUSG00000074754.4	1312	77	146	95	168		71	146	92	168	6	146	3	168		48.6302	54.7619	0.171322	6.13176		4.10965	1.78577	-1.20247	-2.32388		0	0	0	0
chr2	144599897	144768758	+	Dtd1	ENSMUSG00000027430.12	168861	165	2926	165	3079		151	2926	149	3079	14	2926	16	3079		5.16063	4.83924	-0.0927683	-0.321395		0.478472	0.519652	0.119112	0.0411802		1	0.00592203	2.79879	0.0165745
chr2	145167754	145642166	+	Slc24a3	ENSMUSG00000063873.10	474412	8	128	12	132		7	128	12	132	1	128	0	132		5.46882	9.09098	0.733205	3.62215		0.781328	7.57575e-05	-13.3323	-0.781252		3	0.00632362	8.00583	0.0168753
chr2	145675215	145887616	+	Rin2	ENSMUSG00000001768.16	212401	40	985	33	520		23	985	23	520	17	985	10	520		2.33504	4.4231	0.921612	2.08806		1.7259	1.9231	0.156083	0.197197		1	0.00470808	2.7337	0.0128705
chr2	145902099	145916425	+	Naa20	ENSMUSG00000002728.14	14326	774	3443	794	3627		675	3443	702	3627	99	3443	92	3627		19.605	19.3548	-0.018527	-0.250157		2.8754	2.53653	-0.180905	-0.338868		0	0	0	0
chr2	145917479	145935014	-	Crnkl1	ENSMUSG00000001767.5	17535	2189	3699	2370	3546		86	3699	73	3546	2103	3699	2297	3546		2.32496	2.05866	-0.175497	-0.266295		56.8532	64.7772	0.188245	7.92401		0	0	0	0
chr2	145934784	146215039	+	Cfap61	ENSMUSG00000037143.17	280255	4	58	1	65		3	58	0	65	1	58	1	65		5.17258	0.000153846	-15.0371	-5.17242		1.72431	1.53861	-0.164387	-0.185694		0	0	0	0
chr2	146239879	146512344	-	Ralgapa2	ENSMUSG00000037110.20	272465	2502	20814	2879	21598		253	20814	293	21598	2249	20814	2586	21598		1.21553	1.35661	0.15842	0.141079		10.8052	11.9733	0.148095	1.1681		0	0	0	0
chr2	146259286	146267160	+	A930019D19Rik	ENSMUSG00000085958.1	7874	24	229	12	164		19	229	8	164	5	229	4	164		8.29698	4.87811	-0.766266	-3.41888		2.18345	2.43908	0.159731	0.255635		0	0	0	0
chr2	146855864	146970097	+	Kiz	ENSMUSG00000074749.10	114233	563	8171	932	9219		505	8171	868	9219	58	8171	64	9219		6.1804	9.41534	0.607314	3.23494		0.709829	0.69422	-0.0320788	-0.0156091		1	0.00875404	2.60353	0.0227914
chr2	147012996	147078000	+	Xrn2	ENSMUSG00000027433.5	65004	11125	31477	12311	33210		10269	31477	11487	33210	856	31477	824	33210		32.6238	34.589	0.0843867	1.96516		2.71945	2.48118	-0.132286	-0.238266		0	0	0	0
chr2	147361925	147393295	+	Pax1	ENSMUSG00000037034.16	31370	11	92	7	31		5	92	6	31	6	92	1	31		5.43489	19.3551	1.83239	13.9202		6.52184	3.22612	-1.01548	-3.29572		1	0.0318776	2.52433	0.0804696
chr2	148672601	148676027	+	Nxt1	ENSMUSG00000036992.10	3426	148	466	189	586		137	466	175	586	11	466	14	586		29.3992	29.8635	0.0226082	0.464336		2.36054	2.3891	0.0173498	0.0285592		0	0	0	0
chr2	148681023	148692949	+	Gzf1	ENSMUSG00000027439.9	11926	502	1480	666	1946		442	1480	589	1946	60	1480	77	1946		29.8649	30.2672	0.0193067	0.402349		4.05406	3.95684	-0.0350191	-0.0972211		1	0.0838504	3.18932	0.267426
chr2	148693985	148732467	-	Napb	ENSMUSG00000027438.14	38482	45	502	54	439		15	502	22	439	30	502	32	439		2.98807	5.01141	0.746004	2.02334		5.97611	7.28931	0.286575	1.3132		0	0	0	0
chr2	148871722	148875692	-	Cst3	ENSMUSG00000027447.6	3970	553	969	443	810		28	969	23	810	525	969	420	810		2.88959	2.83952	-0.0252171	-0.0500687		54.1796	51.8519	-0.0633533	-2.32771		0	0	0	0
chr2	150114406	150136708	-	Zfp120	ENSMUSG00000068134.13	22302	105	1800	116	2384		25	1800	27	2384	80	1800	89	2384		1.38889	1.13255	-0.294356	-0.25634		4.44445	3.73323	-0.251582	-0.711224		1	0.044839	2.53844	0.113821
chr2	150218073	150240725	+	Zfp937	ENSMUSG00000060336.6	22652	16	205	24	178		13	205	16	178	3	205	8	178		6.34151	8.98882	0.503305	2.64731		1.46346	4.49444	1.61875	3.03097		1	0.0441462	2.7337	0.120683
chr2	150310935	150362765	-	3300002I08Rik	ENSMUSG00000063364.10	51830	119	1361	86	1355		26	1361	25	1355	93	1361	61	1355		1.91037	1.84503	-0.0502091	-0.0653415		6.83322	4.50185	-0.602046	-2.33137		0	0	0	0
chr2	150407141	150451486	-	Zfp442	ENSMUSG00000068130.11	44345	15	263	18	445		3	263	5	445	12	263	13	445		1.14072	1.12362	-0.021796	-0.0171043		4.56277	2.92137	-0.643266	-1.6414		0	0	0	0
chr2	150570415	150578944	+	Cst7	ENSMUSG00000068129.5	8529	56	300	79	293		49	300	74	293	7	300	5	293		16.3334	25.256	0.628804	8.92264		2.33337	1.70652	-0.451357	-0.626848		1	0.117247	2.53407	0.297112
chr2	150583080	150608567	-	Apmap	ENSMUSG00000033096.7	25487	551	1383	604	1549		52	1383	38	1549	499	1383	566	1549		3.75995	2.4532	-0.616047	-1.30675		36.081	36.5397	0.0182262	0.458719		0	0	0	0
chr2	150606233	150610254	+	Gm14123	ENSMUSG00000086407.1	4021	23	103	12	91		9	103	3	91	14	103	9	91		8.73795	3.29681	-1.40622	-5.44114		13.5923	9.89021	-0.458718	-3.70211		0	0	0	0
chr2	150618105	150668500	-	Acss1	ENSMUSG00000027452.11	50395	2447	15257	2947	15667		345	15257	344	15667	2102	15257	2603	15667		2.26126	2.1957	-0.0424454	-0.0655592		13.7773	16.6145	0.270155	2.83726		2	0.0396865	5.31435	0.105454
chr2	150748281	150750762	-	Gm26681	ENSMUSG00000097818.1	2481	50	87	54	82		27	87	34	82	23	87	20	82		31.0346	41.4635	0.417966	10.4289		26.4369	24.3903	-0.116242	-2.04653		0	0	0	0
chr2	150749042	150771675	+	Entpd6	ENSMUSG00000033068.16	22633	505	1675	552	1554		434	1675	476	1554	71	1675	76	1554		25.9105	30.6306	0.241441	4.72018		4.23881	4.89061	0.206355	0.651799		0	0	0	0
chr2	150786735	150831758	+	Pygb	ENSMUSG00000033059.7	45023	2201	6166	2592	6779		2050	6166	2425	6779	151	6166	167	6779		33.2468	35.7722	0.105623	2.5254		2.44891	2.46349	0.00856188	0.0145767		0	0	0	0
chr2	150832493	150904741	-	Abhd12	ENSMUSG00000032046.15	72248	1128	3944	1188	4027		177	3944	158	4027	951	3944	1030	4027		4.48783	3.92352	-0.193871	-0.564313		24.1126	25.5774	0.0850812	1.46478		0	0	0	0
chr2	150905400	150931280	+	Gins1	ENSMUSG00000027454.10	25880	692	2051	793	2898		657	2051	755	2898	35	2051	38	2898		32.0332	26.0525	-0.298147	-5.98071		1.70649	1.31125	-0.380086	-0.395237		0	0	0	0
chr2	150934519	151039382	-	Ninl	ENSMUSG00000068115.13	104863	18	110	20	127		6	110	6	127	12	110	14	127		5.45463	4.72448	-0.207325	-0.730147		10.9092	11.0237	0.0150659	0.11452		1	0.00953625	2.63907	0.0251668
chr2	151029685	151039398	-	Nanp	ENSMUSG00000053916.4	9713	84	913	98	892		22	913	27	892	62	913	71	892		2.40965	3.02692	0.329026	0.617267		6.79081	7.95965	0.229122	1.16884		0	0	0	0
chr2	151494182	151511414	+	Nsfl1c	ENSMUSG00000027455.16	17232	1494	4042	1650	4345		1379	4042	1532	4345	115	4042	118	4345		34.1168	35.2589	0.047507	1.14214		2.84513	2.71577	-0.0671339	-0.129361		1	0.0580316	2.66861	0.154864
chr2	151540731	151542348	-	Gm14167	ENSMUSG00000087433.1	1617	21	90	17	58		9	90	7	58	12	90	10	58		10.0001	12.0691	0.271306	2.06902		13.3334	17.2415	0.370839	3.90809		0	0	0	0
chr2	151542483	151561692	+	Fkbp1a	ENSMUSG00000032966.14	19209	1171	13551	675	7074		1039	13551	599	7074	132	13551	76	7074		7.66733	8.46763	0.143234	0.800298		0.974099	1.07436	0.141335	0.10026		0	0	0	0
chr2	151572622	151590005	+	Sdcbp2	ENSMUSG00000027456.8	17383	36	382	30	225		33	382	28	225	3	382	2	225		8.63877	12.4445	0.526609	3.80572		0.785366	0.888933	0.178709	0.103567		1	0.0575275	2.62085	0.150771
chr2	151702008	151712157	+	Tmem74b	ENSMUSG00000044364.5	10149	2	86	2	90		1	86	2	90	1	86	0	90		1.16291	2.22233	0.93434	1.05943		1.16291	0.000111111	-13.3534	-1.16279		0	0	0	0
chr2	151715812	151744186	-	Psmf1	ENSMUSG00000032869.15	28374	460	3125	518	3238		58	3125	74	3238	402	3125	444	3238		1.856	2.28536	0.300225	0.429361		12.864	13.7122	0.0921173	0.848168		2	0.0704871	5.33723	0.188103
chr2	151911210	151945337	+	Angpt4	ENSMUSG00000027460.7	34127	20	516	30	705		15	516	19	705	5	516	11	705		2.907	2.69505	-0.109217	-0.211946		0.969011	1.5603	0.687236	0.591286		4	0.117209	10.2167	0.299374
chr2	151947273	151950641	-	Gm14154	ENSMUSG00000087004.1	3368	20	99	19	126		9	99	8	126	11	99	11	126		9.091	6.34928	-0.517846	-2.74172		11.1112	8.73023	-0.347923	-2.38097		0	0	0	0
chr2	151969398	151980219	-	Fam110a	ENSMUSG00000027459.16	10821	86	1265	81	1478		29	1265	25	1478	57	1265	56	1478		2.2925	1.69148	-0.438633	-0.601016		4.50594	3.78891	-0.250044	-0.717026		0	0	0	0
chr2	152226839	152281852	+	Csnk2a1	ENSMUSG00000074698.10	55013	4851	18795	4716	18537		4421	18795	4258	18537	430	18795	458	18537		23.5222	22.9703	-0.0342556	-0.551938		2.28784	2.47073	0.110952	0.182892		0	0	0	0
chr2	152293828	152313996	+	Tbc1d20	ENSMUSG00000027465.13	20168	840	3571	727	3408		728	3571	627	3408	112	3571	100	3408		20.3864	18.3979	-0.14807	-1.98856		3.13638	2.93428	-0.0960958	-0.202104		0	0	0	0
chr2	152316334	152332653	-	Rbck1	ENSMUSG00000027466.15	16319	3204	6713	3487	7241		191	6713	232	7241	3013	6713	3255	7241		2.84523	3.20398	0.171321	0.358752		44.8831	44.9524	0.00222556	0.0692919		0	0	0	0
chr2	152669461	152708670	+	H13	ENSMUSG00000019188.16	39209	5291	20156	4415	16705		4898	20156	4074	16705	393	20156	341	16705		24.3005	24.3879	0.00518259	0.0874514		1.94979	2.04131	0.0661719	0.0915135		1	0.0255043	2.87162	0.0732388
chr2	152754173	152765037	+	Cox4i2	ENSMUSG00000009876.13	10864	17	265	29	174		13	265	19	174	4	265	10	174		4.9057	10.9196	1.15439	6.0139		1.50947	5.74718	1.92881	4.23771		0	0	0	0
chr2	152780668	152831728	-	Bcl2l1	ENSMUSG00000007659.18	51060	845	34813	709	31689		156	34813	106	31689	689	34813	603	31689		0.448109	0.334501	-0.421837	-0.113608		1.97915	1.90287	-0.0567019	-0.0762772		2	0.0391696	5.20148	0.10187
chr2	152847964	152895321	+	Tpx2	ENSMUSG00000027469.16	47357	5075	8715	7329	12259		4817	8715	6949	12259	258	8715	380	12259		55.2725	56.6849	0.0364017	1.41237		2.96041	3.09976	0.0663594	0.13935		0	0	0	0
chr2	152962485	153008482	+	Ttll9	ENSMUSG00000074673.15	45997	9	105	9	70		8	105	7	70	1	105	2	70		7.61914	10.0001	0.392319	2.38099		0.952475	2.85728	1.58489	1.90481		3	0.0652216	8.02885	0.174552
chr2	153008890	153015427	-	Pdrg1	ENSMUSG00000027472.14	6537	519	1358	539	1423		117	1358	126	1423	402	1358	413	1423		8.61562	8.85454	0.0394629	0.238921		29.6024	29.0232	-0.0285059	-0.579166		0	0	0	0
chr2	153108468	153151441	+	Hck	ENSMUSG00000003283.14	42973	132	720	196	719		124	720	187	719	8	720	9	719		17.2222	26.0084	0.594703	8.78612		1.11112	1.25175	0.171928	0.140627		1	0.0232704	2.87608	0.0669276
chr2	153161303	153210466	+	Tm9sf4	ENSMUSG00000068040.10	49163	1337	5755	1448	5771		1226	5755	1323	5771	111	5755	125	5771		21.3032	22.925	0.105849	1.62176		1.92876	2.166	0.167363	0.237245		1	0.0203405	2.66861	0.0542809
chr2	153227759	153241426	-	Plagl2	ENSMUSG00000051413.17	13667	214	2574	216	2363		78	2574	76	2363	136	2574	140	2363		3.03031	3.21625	0.0859178	0.185948		5.28361	5.92468	0.165213	0.641067		0	0	0	0
chr2	153241533	153270247	+	Pofut1	ENSMUSG00000046020.13	28714	287	2614	285	2709		258	2614	249	2709	29	2614	36	2709		9.86993	9.19159	-0.102727	-0.678348		1.10941	1.32891	0.260442	0.219493		1	0.0348262	2.63811	0.0918754
chr2	153291413	153333390	+	Kif3b	ENSMUSG00000027475.9	41977	498	4633	598	3775		448	4633	560	3775	50	4633	38	3775		9.66976	14.8344	0.617398	5.16468		1.07922	1.00663	-0.100458	-0.0725913		2	0.0476451	5.72776	0.13645
chr2	153341157	153346073	-	2500004C02Rik	ENSMUSG00000073236.4	4916	48	534	56	714		26	534	24	714	22	534	32	714		4.86893	3.36136	-0.534561	-1.50757		4.11987	4.48181	0.121482	0.361938		0	0	0	0
chr2	153345829	153404007	+	Asxl1	ENSMUSG00000042548.14	58178	1640	23999	2110	30033		1371	23999	1767	30033	269	23999	343	30033		5.71274	5.88353	0.0424991	0.17079		1.12088	1.14208	0.027028	0.0211969		0	0	0	0
chr2	153407462	153529971	-	Nol4l	ENSMUSG00000061411.12	122509	23	540	20	341		7	540	6	341	16	540	14	341		1.29631	1.75956	0.440799	0.463245		2.96298	4.1056	0.470544	1.14262		4	0.0326507	10.7342	0.0876195
chr2	153616933	153632781	-	Commd7	ENSMUSG00000056941.17	15848	653	1907	764	2107		34	1907	33	2107	619	1907	731	2107		1.78291	1.56621	-0.186954	-0.216698		32.4594	34.6939	0.0960465	2.23452		0	0	0	0
chr2	153649450	153687730	+	Dnmt3b	ENSMUSG00000027478.15	38280	292	901	342	1062		249	901	301	1062	43	901	41	1062		27.636	28.3428	0.0364329	0.706788		4.77249	3.86065	-0.305897	-0.911836		0	0	0	0
chr2	153741274	153773310	+	Mapre1	ENSMUSG00000027479.14	32036	3802	9945	3093	10415		3700	9945	2975	10415	102	9945	118	10415		37.2046	28.5646	-0.381255	-8.64006		1.02564	1.13298	0.143598	0.10734		0	0	0	0
chr2	153779931	153844751	+	Efcab8	ENSMUSG00000044083.12	64820	121	580	96	435		96	580	83	435	25	580	13	435		16.5517	19.0805	0.205115	2.52874		4.31036	2.98853	-0.528374	-1.32183		1	0.0154273	2.7337	0.0421737
chr2	154335380	154373010	-	Cdk5rap1	ENSMUSG00000027487.11	37630	388	2071	805	4564		54	2071	92	4564	334	2071	713	4564		2.60744	2.01578	-0.371298	-0.591663		16.1275	15.6223	-0.0459175	-0.505216		0	0	0	0
chr2	154376313	154408099	-	Snta1	ENSMUSG00000027488.12	31786	3	72	7	61		1	72	1	61	2	72	6	61		1.38903	1.63951	0.239187	0.25048		2.77791	9.83621	1.8241	7.0583		1	0.0314604	2.75174	0.0865708
chr2	154436481	154539356	+	Cbfa2t2	ENSMUSG00000038533.15	102875	657	13075	794	15548		495	13075	595	15548	162	13075	199	15548		3.78585	3.82686	0.015543	0.0410078		1.23901	1.27991	0.0468564	0.0409015		2	0.0194411	5.18548	0.0504056
chr2	154544399	154558890	-	Necab3	ENSMUSG00000027489.15	14491	200	448	204	486		47	448	70	486	153	448	134	486		10.4911	14.4033	0.457236	3.91222		34.1518	27.572	-0.308756	-6.57977		0	0	0	0
chr2	154559407	154569892	-	E2f1	ENSMUSG00000027490.17	10485	307	1111	435	1563		33	1111	57	1563	274	1111	378	1563		2.97031	3.64684	0.296035	0.676533		24.6625	24.1843	-0.0282487	-0.478207		0	0	0	0
chr2	154585758	154603708	-	Pxmp4	ENSMUSG00000000876.11	17950	287	2417	338	2193		21	2417	21	2193	266	2417	317	2193		0.86885	0.957597	0.140312	0.0887471		11.0054	14.4551	0.393368	3.44971		0	0	0	0
chr2	154613297	154646821	+	Zfp341	ENSMUSG00000059842.12	33524	72	739	115	754		56	739	103	754	16	739	12	754		7.57782	13.6605	0.850154	6.08267		2.1651	1.59152	-0.444025	-0.573576		2	0.0596588	5.29597	0.157975
chr2	154651705	154694785	+	Chmp4b	ENSMUSG00000038467.15	43080	1818	8937	1250	9015		1752	8937	1178	9015	66	8937	72	9015		19.6039	13.0671	-0.5852	-6.53678		0.738504	0.79867	0.112994	0.060166		1	0.0232126	2.60902	0.0605622
chr2	154791096	154867261	+	Raly	ENSMUSG00000027593.15	76165	9490	43916	9707	42489		9048	43916	9228	42489	442	43916	479	42489		20.603	21.7186	0.0760763	1.11559		1.00647	1.12735	0.163637	0.120884		0	0	0	0
chr2	154791402	155051012	+	a	ENSMUSG00000027596.10	259610	57	229	36	167		54	229	32	167	3	229	4	167		23.5808	19.1617	-0.299386	-4.41909		1.31009	2.39527	0.870525	1.08518		2	0.00770386	5.64537	0.0217456
chr2	154871410	154892935	-	Eif2s2	ENSMUSG00000074656.12	21525	1219	4735	1341	4667		131	4735	96	4667	1088	4735	1245	4667		2.76663	2.057	-0.427591	-0.709635		22.9778	26.6767	0.215336	3.69884		0	0	0	0
chr2	155059310	155074497	-	Ahcy	ENSMUSG00000027597.15	15187	1713	2315	2137	2792		97	2315	96	2792	1616	2315	2041	2792		4.19007	3.4384	-0.285237	-0.75167		69.8056	73.1017	0.0665622	3.2961		1	0.0658458	2.56111	0.168638
chr2	155133509	155226855	+	Itch	ENSMUSG00000027598.16	93346	6040	21274	5761	19275		5619	21274	5337	19275	421	21274	424	19275		26.4125	27.6887	0.0680761	1.27619		1.97894	2.19974	0.152604	0.220799		1	0.0107128	2.60353	0.0278912
chr2	155236533	155250277	+	Dynlrb1	ENSMUSG00000047459.14	13744	1114	3984	2363	4255		1076	3984	2317	4255	38	3984	46	4255		27.008	54.4536	1.01164	27.4456		0.953818	1.08108	0.180692	0.127266		2	0.145518	5.28121	0.384256
chr2	155276297	155278073	+	Map1lc3a	ENSMUSG00000027602.9	1776	124	140	103	107		118	140	96	107	6	140	7	107		84.2857	89.7196	0.0901354	5.43391		4.28578	6.54214	0.610205	2.25636		0	0	0	0
chr2	155278243	155357430	-	Pigu	ENSMUSG00000038383.16	79187	416	4101	535	4893		34	4101	66	4893	382	4101	469	4893		0.829068	1.34887	0.702186	0.519799		9.3148	9.58512	0.0412717	0.27032		2	0.0252567	5.60012	0.0707202
chr2	155381059	155389850	+	Trp53inp2	ENSMUSG00000038375.15	8791	59	273	32	120		43	273	24	120	16	273	8	120		15.7509	20.0001	0.344566	4.24912		5.86084	6.66674	0.185875	0.805904		0	0	0	0
chr2	155390656	155473894	-	Ncoa6	ENSMUSG00000038369.14	83238	824	6205	907	6088		116	6205	125	6088	708	6205	782	6088		1.86946	2.05322	0.135266	0.183759		11.4102	12.8449	0.170882	1.43479		1	0.0120137	2.7337	0.032842
chr2	155459501	155460892	-	Gm14239	ENSMUSG00000080237.2	1391	53	202	60	206		43	202	36	206	10	202	24	206		21.2872	17.4758	-0.284628	-3.8114		4.95054	11.6505	1.23474	6.69999		0	0	0	0
chr2	155490379	155518237	-	Ggt7	ENSMUSG00000027603.15	27858	235	824	237	787		40	824	26	787	195	824	211	787		4.85438	3.3037	-0.555206	-1.55068		23.6651	26.8107	0.18005	3.14562		0	0	0	0
chr2	155517948	155585724	+	Acss2	ENSMUSG00000027605.18	67776	1307	1957	1131	1726		1238	1957	1044	1726	69	1957	87	1726		63.2601	60.4867	-0.0646783	-2.77342		3.52581	5.04056	0.51563	1.51475		0	0	0	0
chr2	155563181	155592810	-	Gss	ENSMUSG00000027610.17	29629	204	570	273	595		34	570	34	595	170	570	239	595		5.96493	5.7143	-0.0619277	-0.250627		29.8246	40.1681	0.429548	10.3435		0	0	0	0
chr2	155611212	155634307	+	Myh7b	ENSMUSG00000074652.3	23095	113	175	54	93		58	175	32	93	55	175	22	93		33.1429	34.4087	0.0540726	1.26578		31.4286	23.656	-0.409873	-7.77261		1	0.0432994	2.67016	0.115616
chr2	155634271	155692384	-	Trpc4ap	ENSMUSG00000038324.13	58113	7499	31207	4660	21677		544	31207	473	21677	6955	31207	4187	21677		1.7432	2.18204	0.323938	0.438838		22.2867	19.3154	-0.206429	-2.97126		1	0.0172079	2.85103	0.0490601
chr2	155701677	155729475	-	Edem2	ENSMUSG00000038312.10	27798	1153	3214	1161	3229		90	3214	82	3229	1063	3214	1079	3229		2.80025	2.53949	-0.141018	-0.260763		33.0741	33.4159	0.0148358	0.341867		1	0.0359738	2.53844	0.0913174
chr2	155775342	155818366	+	Mmp24	ENSMUSG00000027612.7	43024	11	109	10	104		10	109	6	104	1	109	4	104		9.1744	5.76932	-0.669211	-3.40507		0.917522	3.84625	2.06764	2.92872		2	0.0464857	5.64008	0.131091
chr2	155817730	155819426	-	BC029722	ENSMUSG00000074649.6	1696	62	64	92	93		5	64	3	93	57	64	89	93		7.81264	3.22591	-1.2761	-4.58673		89.0625	95.6989	0.103684	6.63641		0	0	0	0
chr2	155819832	155826925	-	Eif6	ENSMUSG00000027613.15	7093	1227	2260	1165	2112		110	2260	136	2112	1117	2260	1029	2112		4.86726	6.4394	0.403816	1.57214		49.4248	48.7216	-0.0206733	-0.703188		0	0	0	0
chr2	155846894	155930310	-	Uqcc1	ENSMUSG00000005882.18	83416	525	5395	608	5468		57	5395	58	5468	468	5395	550	5468		1.05654	1.06072	0.00570065	0.00418305		8.6747	10.0585	0.213533	1.38382		2	0.0239762	5.12786	0.0614733
chr2	155956458	155998900	+	Cep250	ENSMUSG00000038241.16	42442	2125	5034	2269	4953		1842	5034	2003	4953	283	5034	266	4953		36.5912	40.4401	0.144292	3.84896		5.62177	5.37048	-0.0659732	-0.251289		4	0.0942463	10.8086	0.254667
chr2	155973279	156007977	-	6430550D23Rik	ENSMUSG00000074646.10	34698	43	263	31	176		10	263	9	176	33	263	22	176		3.80232	5.11369	0.427486	1.31137		12.5476	12.5	-0.00547322	-0.0475121		2	0.0576402	5.74707	0.165631
chr2	156008045	156018279	+	Ergic3	ENSMUSG00000005881.13	10234	2630	5166	2172	4670		2394	5166	1983	4670	236	5166	189	4670		46.3415	42.4625	-0.126113	-3.87894		4.56833	4.04711	-0.174775	-0.521222		2	0.195427	5.45735	0.533257
chr2	156065175	156070617	+	Spag4	ENSMUSG00000038180.11	5442	27	58	17	42		20	58	13	42	7	58	4	42		34.4829	30.9525	-0.155822	-3.53033		12.0691	9.52402	-0.341677	-2.54509		2	0.367512	5.50745	1.01203
chr2	156071842	156111965	-	Cpne1	ENSMUSG00000074643.12	40123	1729	2862	1671	2701		101	2862	104	2701	1628	2862	1567	2701		3.529	3.85043	0.125758	0.321425		56.8833	58.0156	0.0284345	1.13225		0	0	0	0
chr2	156071845	156127092	-	Gm28036	ENSMUSG00000098950.7	55247	103	132	98	132		10	132	3	132	93	132	95	132		7.57583	2.2728	-1.73693	-5.30303		70.4546	71.9697	0.0306968	1.51515		0	0	0	0
chr2	156123639	156144186	-	Nfs1	ENSMUSG00000027618.17	20547	714	1922	697	1803		72	1922	53	1803	642	1922	644	1803		3.7461	2.93955	-0.349795	-0.806552		33.4027	35.7183	0.0966963	2.31554		0	0	0	0
chr2	156144039	156145797	+	Romo1	ENSMUSG00000067847.13	1758	265	1390	243	1392		253	1390	230	1392	12	1390	13	1392		18.2014	16.523	-0.139578	-1.67845		0.863316	0.933915	0.113402	0.0705987		2	1.13766	5.36062	3.04927
chr2	156147239	156180238	-	Rbm39	ENSMUSG00000027620.16	32999	26530	80732	25044	77940		3930	80732	4015	77940	22600	80732	21029	77940		4.86796	5.1514	0.0816474	0.28344		27.9939	26.981	-0.0531658	-1.01285		1	0.0303039	2.69292	0.0816061
chr2	156196466	156309952	+	Phf20	ENSMUSG00000038116.16	113486	1225	13231	1218	12230		992	13231	1031	12230	233	13231	187	12230		7.49754	8.43009	0.16913	0.932546		1.76102	1.52903	-0.203794	-0.231989		2	0.0176233	5.34335	0.0470838
chr2	156312299	156375638	+	Cnbd2	ENSMUSG00000038085.13	63339	41	845	26	271		14	845	7	271	27	845	19	271		1.65682	2.58306	0.640668	0.926245		3.19528	7.0111	1.1337	3.81583		0	0	0	0
chr2	156420909	156543214	+	Epb41l1	ENSMUSG00000027624.19	122305	41	323	28	159		37	323	27	159	4	323	1	159		11.4551	16.9812	0.567943	5.52605		1.23842	0.628993	-0.977385	-0.609427		0	0	0	0
chr2	156547584	156568972	+	Aar2	ENSMUSG00000027628.10	21388	166	2397	133	2132		125	2397	89	2132	41	2397	44	2132		5.21486	4.17449	-0.321028	-1.04037		1.71048	2.06379	0.270902	0.353319		0	0	0	0
chr2	156571792	156577457	+	Gm14168	ENSMUSG00000055494.5	5665	3	63	3	77		0	63	0	77	3	63	3	77		0.00015873	0.00012987	-0.289506	-2.88599e-05		4.76206	3.89623	-0.289506	-0.865827		0	0	0	0
chr2	156613705	156764363	+	Dlgap4	ENSMUSG00000061689.15	150658	198	3546	464	3753		183	3546	441	3753	15	3546	23	3753		5.16075	11.7506	1.18708	6.58985		0.423015	0.612846	0.534816	0.189831		5	0.0331877	12.9035	0.0856474
chr2	156833049	156839892	-	Gm14230	ENSMUSG00000087179.8	6843	27	515	24	361		11	515	7	361	16	515	17	361		2.13594	1.93909	-0.139496	-0.196856		3.10681	4.70917	0.600036	1.60235		0	0	0	0
chr2	156840007	156855570	+	Tgif2	ENSMUSG00000062175.13	15563	136	988	115	948		98	988	69	948	38	988	46	948		9.91904	7.27849	-0.446561	-2.64055		3.84616	4.85233	0.335258	1.00617		1	0.064255	2.7337	0.175654
chr2	156863128	156873563	+	Rab5if	ENSMUSG00000027637.3	10435	730	4916	644	4182		702	4916	619	4182	28	4916	25	4182		14.2799	14.8015	0.0517603	0.521628		0.569571	0.597802	0.0697937	0.0282317		1	0.0958313	2.51266	0.240792
chr2	156872457	156887192	-	Sla2	ENSMUSG00000027636.11	14735	3477	11563	2773	9142		302	11563	246	9142	3175	11563	2527	9142		2.61178	2.69088	0.0430439	0.0790985		27.4583	27.6417	0.00960311	0.183382		0	0	0	0
chr2	156927345	156992056	-	Ndrg3	ENSMUSG00000027634.14	64711	1802	5976	1684	6386		209	5976	193	6386	1593	5976	1491	6386		3.49732	3.02224	-0.210634	-0.475087		26.6566	23.3479	-0.191198	-3.30868		1	0.0154533	2.79879	0.0432506
chr2	156995265	157007154	-	Dsn1	ENSMUSG00000027635.15	11889	807	1400	1077	1855		61	1400	85	1855	746	1400	992	1855		4.35715	4.58222	0.0726606	0.225066		53.2857	53.4771	0.00517211	0.191374		0	0	0	0
chr2	157015799	157079254	-	Soga1	ENSMUSG00000055485.6	63455	65	480	53	391		9	480	6	391	56	480	47	391		1.87502	1.53455	-0.289089	-0.340468		11.6667	12.0205	0.0431002	0.353798		1	0.0157592	2.50131	0.0394186
chr2	157087055	157096482	+	Tldc2	ENSMUSG00000074628.9	9427	6	69	9	59		4	69	6	59	2	69	3	59		5.79724	10.1696	0.810832	4.37241		2.89869	5.08491	0.81082	2.18622		0	0	0	0
chr2	157097533	157135265	-	Samhd1	ENSMUSG00000027639.16	37732	1601	4621	1976	5958		121	4621	177	5958	1480	4621	1799	5958		2.61848	2.9708	0.182119	0.352314		32.0277	30.1947	-0.085025	-1.833		2	0.0530054	5.31202	0.140783
chr2	157145893	157204534	-	Rbl1	ENSMUSG00000027641.13	58641	2886	10247	4228	14289		216	10247	335	14289	2670	10247	3893	14289		2.10793	2.34446	0.153426	0.236526		26.0564	27.2447	0.0643392	1.18833		2	0.0341058	5.69354	0.0970915
chr2	157208550	157279549	-	Mroh8	ENSMUSG00000074627.11	70999	12	144	16	182		2	144	6	182	10	144	10	182		1.38896	3.29676	1.24704	1.9078		6.94451	5.49456	-0.337869	-1.44995		1	0.0140847	2.66861	0.0375866
chr2	157279017	157326319	+	Rpn2	ENSMUSG00000027642.15	47302	6159	11221	6047	11644		5980	11221	5859	11644	179	11221	188	11644		53.2929	50.3178	-0.0828765	-2.97517		1.59522	1.61457	0.0173875	0.0193422		0	0	0	0
chr2	157329497	157347506	-	Ghrh	ENSMUSG00000027643.9	18009	3	55	2	48		1	55	1	48	2	55	1	48		1.81836	2.08354	0.196397	0.265177		3.63654	2.08354	-0.803531	-1.553		0	0	0	0
chr2	157367594	157396763	+	Manbal	ENSMUSG00000063019.5	29169	36	3709	138	3430		14	3709	120	3430	22	3709	18	3430		0.377463	3.49855	3.21235	3.12108		0.593154	0.524784	-0.176683	-0.0683702		0	0	0	0
chr2	157418444	157471862	+	Src	ENSMUSG00000027646.15	53418	70	498	50	368		59	498	47	368	11	498	3	368		11.8474	12.7718	0.108386	0.924356		2.20885	0.815244	-1.43799	-1.39361		1	0.0187203	3.0775	0.0576117
chr2	157556362	157571274	-	Blcap	ENSMUSG00000067787.10	14912	39	240	37	231		18	240	11	231	21	240	26	231		7.50004	4.76195	-0.655347	-2.73809		8.75004	11.2554	0.363263	2.50541		1	0.0670601	2.72799	0.182939
chr2	157560078	157562522	+	Nnat	ENSMUSG00000067786.16	2444	12	54	13	71		2	54	9	71	10	54	4	71		3.70388	12.6762	1.77501	8.9723		18.5187	5.63394	-1.71677	-12.8847		1	0.409165	2.72799	1.1162
chr2	157737401	157891614	+	Ctnnbl1	ENSMUSG00000027649.15	154213	2638	17352	2341	18005		2457	17352	2152	18005	181	17352	189	18005		14.1598	11.9522	-0.244515	-2.20752		1.04311	1.04971	0.00910086	0.00660097		4	0.0259382	10.499	0.0680812
chr2	157981803	158028433	-	Tti1	ENSMUSG00000027650.12	46630	558	4897	590	5500		79	4897	76	5500	479	4897	514	5500		1.61323	1.38182	-0.223387	-0.231415		9.7815	9.34546	-0.0657907	-0.436045		2	0.0428908	5.66267	0.121438
chr2	158028497	158132297	+	Rprd1b	ENSMUSG00000027651.16	103800	523	5628	621	6004		447	5628	511	6004	76	5628	110	6004		7.94243	8.51099	0.0997468	0.568562		1.35039	1.83211	0.44013	0.481721		3	0.0289017	8.51355	0.0820188
chr2	158070367	158091797	-	2010009K17Rik	ENSMUSG00000100860.1	21430	5	137	2	151		4	137	2	151	1	137	0	151		2.91978	1.32457	-1.14034	-1.59521		0.729999	6.62251e-05	-13.4282	-0.729933		0	0	0	0
chr2	158116402	158146436	-	Tgm2	ENSMUSG00000037820.15	30034	66	141	143	261		9	141	6	261	57	141	137	261		6.38305	2.29889	-1.47331	-4.08416		40.4256	52.4904	0.376786	12.0649		0	0	0	0
chr2	158306493	158332852	+	Lbp	ENSMUSG00000016024.9	26359	18	67	5	22		15	67	5	22	3	67	0	22		22.3882	22.7276	0.0217099	0.339448		4.47775	0.000454543	-13.2661	-4.4773		0	0	0	0
chr2	158353700	158361580	-	Snhg17	ENSMUSG00000085385.7	7880	151	193	157	211		26	193	31	211	125	193	126	211		13.4715	14.692	0.125114	1.22044		64.7669	59.7157	-0.117146	-5.0512		0	0	0	0
chr2	158409848	158499253	+	Ralgapb	ENSMUSG00000027652.15	89405	4809	16709	5131	16105		4432	16709	4764	16105	377	16709	367	16105		26.5246	29.5809	0.157332	3.05625		2.25627	2.2788	0.0143323	0.0225264		1	0.0111851	2.66861	0.0298486
chr2	158624888	158639211	+	Actr5	ENSMUSG00000037761.16	14323	598	2505	572	2491		481	2505	457	2491	117	2505	115	2491		19.2016	18.346	-0.0657571	-0.855551		4.67066	4.61662	-0.0167891	-0.0540388		0	0	0	0
chr2	158665398	158766334	+	Ppp1r16b	ENSMUSG00000037754.13	100936	2709	22975	3118	24565		2439	22975	2825	24565	270	22975	293	24565		10.6159	11.5001	0.115422	0.884215		1.17519	1.19275	0.0214018	0.0175635		4	0.0396291	10.6332	0.105346
chr2	158768093	158786637	+	Fam83d	ENSMUSG00000027654.2	18544	129	1789	131	2621		103	1789	105	2621	26	1789	26	2621		5.75741	4.00611	-0.523219	-1.7513		1.45333	0.991992	-0.550964	-0.46134		0	0	0	0
chr2	158794807	158858214	+	Dhx35	ENSMUSG00000027655.14	63407	970	3744	1127	4261		882	3744	1046	4261	88	3744	81	4261		23.5577	24.5482	0.0594207	0.990536		2.35043	1.90096	-0.306193	-0.449465		0	0	0	0
chr2	160311393	160334162	-	Gm826	ENSMUSG00000074623.4	22769	2	112	2	42		2	112	2	42	0	112	0	42		1.7858	4.76213	1.41504	2.97633		8.92856e-05	0.000238095	1.41504	0.000148809		1	0.0439194	2.7337	0.120062
chr2	160645888	160722764	+	Top1	ENSMUSG00000070544.6	76876	7344	22529	6719	20795		7002	22529	6453	20795	342	22529	266	20795		31.0799	31.0315	-0.00225044	-0.0484434		1.51804	1.27915	-0.247023	-0.23889		0	0	0	0
chr2	160731300	160775760	+	Plcg1	ENSMUSG00000016933.17	44460	11698	22080	10693	19760		9732	22080	8942	19760	1966	22080	1751	19760		44.0761	45.253	0.0380185	1.17695		8.90399	8.86134	-0.006927	-0.0426494		0	0	0	0
chr2	160743927	160751909	-	Gm27206	ENSMUSG00000098889.1	7982	402	3495	313	3047		187	3495	150	3047	215	3495	163	3047		5.3505	4.92288	-0.120173	-0.427625		6.15165	5.34953	-0.201562	-0.802121		0	0	0	0
chr2	160748708	160872998	-	Zhx3	ENSMUSG00000035877.17	124290	119	5241	66	5777		18	5241	34	5777	101	5241	32	5777		0.343448	0.588542	0.777056	0.245095		1.92712	0.553922	-1.79869	-1.37319		0	0	0	0
chr2	160946978	161109075	-	Chd6	ENSMUSG00000057133.14	162097	4544	30731	4584	33625		491	30731	595	33625	4053	30731	3989	33625		1.59774	1.76952	0.147327	0.171782		13.1886	11.8632	-0.152803	-1.32544		1	0.00616915	2.66861	0.016463
chr2	161521990	162661147	-	Ptprt	ENSMUSG00000053141.16	1139157	2	129	0	55		0	129	0	55	2	129	0	55		7.75193e-05	0.000181818	1.22987	0.000104299		1.55046	0.000181818	-13.0579	-1.55028		3	0.00263353	7.94075	0.00697072
chr2	162931528	162937121	+	Srsf6	ENSMUSG00000016921.14	5593	4753	4875	4703	4815		4654	4875	4592	4815	99	4875	111	4815		95.4667	95.3686	-0.00148215	-0.098027		2.03077	2.3053	0.182926	0.274527		0	0	0	0
chr2	162943472	162974522	+	L3mbtl1	ENSMUSG00000035576.13	31050	16	93	19	103		4	93	13	103	12	93	6	103		4.30118	12.6214	1.55307	8.32027		12.9033	5.82533	-1.14733	-7.07799		0	0	0	0
chr2	163017354	163046141	+	Ift52	ENSMUSG00000017858.12	28787	1159	3628	1514	3843		1050	3628	1409	3843	109	3628	105	3843		28.9416	36.6641	0.341224	7.7225		3.00441	2.73224	-0.136997	-0.27217		0	0	0	0
chr2	163054687	163084688	+	Mybl2	ENSMUSG00000017861.11	30001	864	2307	1517	3655		796	2307	1416	3655	68	2307	101	3655		34.5037	38.7415	0.167127	4.23776		2.94756	2.76334	-0.0931054	-0.184215		0	0	0	0
chr2	163122606	163143959	+	Gm11454	ENSMUSG00000086152.1	21353	5	69	9	155		5	69	4	155	0	69	5	155		7.24651	2.58071	-1.48952	-4.6658		0.000144927	3.22587	14.4421	3.22572		0	0	0	0
chr2	163203125	163324170	+	Tox2	ENSMUSG00000074607.11	121045	34	1721	61	2495		27	1721	45	2495	7	1721	16	2495		1.56886	1.80361	0.201171	0.23475		0.406746	0.641287	0.656841	0.23454		2	0.0165228	5.34284	0.0441393
chr2	163405822	163424697	-	Oser1	ENSMUSG00000035399.12	18875	494	2785	532	2812		58	2785	48	2812	436	2785	484	2812		2.08259	1.70697	-0.286937	-0.375615		15.6553	17.212	0.13676	1.55665		0	0	0	0
chr2	163602314	163619013	+	Ttpal	ENSMUSG00000017679.16	16699	341	2978	376	2737		262	2978	318	2737	79	2978	58	2737		8.79785	11.6186	0.401208	2.82071		2.65279	2.11911	-0.324051	-0.533678		0	0	0	0
chr2	163623272	163645131	-	Serinc3	ENSMUSG00000017707.9	21859	11891	23230	13988	28094		560	23230	566	28094	11331	23230	13422	28094		2.41068	2.01467	-0.258898	-0.396011		48.7774	47.7753	-0.0299484	-1.00212		2	0.0914955	5.37277	0.245792
chr2	163658386	163726158	+	Pkig	ENSMUSG00000035268.14	67772	111	2191	289	2813		91	2191	243	2813	20	2191	46	2813		4.15336	8.63847	1.0565	4.48511		0.91283	1.63527	0.84111	0.722439		2	0.0295107	5.23509	0.0772456
chr2	163685004	163692279	-	Gm16316	ENSMUSG00000087129.1	7275	14	122	8	204		7	122	4	204	7	122	4	204		5.73778	1.96083	-1.54903	-3.77695		5.73778	1.96083	-1.54903	-3.77695		0	0	0	0
chr2	163726584	163750239	-	Ada	ENSMUSG00000017697.3	23655	3313	6447	2426	4480		201	6447	143	4480	3112	6447	2283	4480		3.11773	3.19197	0.0339492	0.0742358		48.2705	50.9598	0.0782181	2.68931		0	0	0	0
chr2	163994960	164018588	+	Ywhab	ENSMUSG00000018326.9	23628	1494	7768	2003	8033		1358	7768	1873	8033	136	7768	130	8033		17.482	23.3163	0.415472	5.83434		1.75077	1.61833	-0.113491	-0.132448		0	0	0	0
chr2	164025450	164050538	+	Pabpc1l	ENSMUSG00000054582.4	25088	32	189	24	144		22	189	19	144	10	189	5	144		11.6403	13.1945	0.180814	1.55425		5.29106	3.47229	-0.607668	-1.81877		1	0.0398597	2.84229	0.113293
chr2	164053540	164071169	-	Tomm34	ENSMUSG00000018322.10	17629	1392	5907	1199	5127		181	5907	149	5127	1211	5907	1050	5127		3.06416	2.90618	-0.0763665	-0.157978		20.5011	20.4798	-0.00149881	-0.0212874		0	0	0	0
chr2	164070322	164155524	+	Stk4	ENSMUSG00000018209.15	85202	8982	37133	10633	42822		8242	37133	9727	42822	740	37133	906	42822		22.1959	22.715	0.0333501	0.519069		1.99284	2.11574	0.0863354	0.122898		2	0.0234736	5.62795	0.0660542
chr2	164135703	164140419	+	Gm11455	ENSMUSG00000085538.1	4716	73	2113	71	2341		30	2113	31	2341	43	2113	40	2341		1.41979	1.32422	-0.100527	-0.0955623		2.03503	1.70868	-0.252169	-0.32635		0	0	0	0
chr2	164424247	164443887	-	Sdc4	ENSMUSG00000017009.3	19640	249	974	699	2189		6	974	21	2189	243	974	678	2189		0.616027	0.959347	0.63906	0.34332		24.9487	30.9731	0.31205	6.02438		2	0.101833	5.19762	0.264645
chr2	164456964	164479638	+	Sys1	ENSMUSG00000045503.16	22674	320	1302	505	1379		296	1302	486	1379	24	1302	19	1379		22.7343	35.2429	0.632466	12.5087		1.84333	1.37782	-0.419926	-0.465508		1	0.0441034	2.60353	0.114824
chr2	164470301	164473724	-	Trp53tg5	ENSMUSG00000017720.2	3423	57	156	64	141		29	156	37	141	28	156	27	141		18.5898	26.2412	0.497322	7.65139		17.9488	19.149	0.0933835	1.20022		0	0	0	0
chr2	164486106	164493319	+	Dbndd2	ENSMUSG00000017734.15	7213	13	55	12	56		6	55	5	56	7	55	7	56		10.9093	8.92873	-0.289025	-1.98052		12.7274	12.5002	-0.0259952	-0.227275		1	0.138639	2.54707	0.353122
chr2	164497520	164508301	+	Pigt	ENSMUSG00000017721.15	10781	1015	1733	1065	1780		947	1733	991	1780	68	1733	74	1780		54.6451	55.6742	0.026915	1.02903		3.92384	4.15731	0.0833848	0.233472		0	0	0	0
chr2	164745983	164768607	+	Dnttip1	ENSMUSG00000017299.13	22624	1387	5333	1398	5281		1193	5333	1206	5281	194	5333	192	5281		22.3701	22.8366	0.029772	0.466436		3.63773	3.63568	-0.000814147	-0.00205228		0	0	0	0
chr2	164754242	164769666	-	Gm11457	ENSMUSG00000086453.7	15424	46	56	49	60		29	56	27	60	17	56	22	60		51.7858	45.0001	-0.202629	-6.78571		30.3573	36.6668	0.272431	6.30951		0	0	0	0
chr2	164769898	164778822	+	Ube2c	ENSMUSG00000001403.13	8924	2394	2862	3365	3934		2310	2862	3244	3934	84	2862	121	3934		80.7128	82.4606	0.0309077	1.74781		2.93501	3.07575	0.067572	0.140738		2	0.224115	5.39763	0.604844
chr2	164785823	164793816	+	Snx21	ENSMUSG00000050373.13	7993	51	303	76	315		28	303	38	315	23	303	38	315		9.24095	12.0635	0.384537	2.82257		7.59079	12.0635	0.668329	4.47273		0	0	0	0
chr2	164792765	164804882	-	Acot8	ENSMUSG00000017307.16	12117	303	2089	350	2140		80	2089	85	2140	223	2089	265	2140		3.82959	3.97197	0.0526644	0.142379		10.675	12.3832	0.21415	1.70821		0	0	0	0
chr2	164805098	164822130	+	Zswim3	ENSMUSG00000045822.4	17032	8	1446	10	1458		7	1446	9	1458	1	1446	1	1458		0.484101	0.617291	0.350642	0.13319		0.0691632	0.068594	-0.0119232	-0.000569244		1	0.058713	2.86388	0.168147
chr2	164822686	164826871	+	Zswim1	ENSMUSG00000017764.2	4185	22	54	30	68		16	54	21	68	6	54	9	68		29.6298	30.8825	0.0597405	1.25269		11.1113	13.2354	0.25238	2.12415		0	0	0	0
chr2	164826389	164828537	-	Spata25	ENSMUSG00000017767.3	2148	24	89	23	97		14	89	17	97	10	89	6	97		15.7304	17.5259	0.155927	1.79543		11.2361	6.18566	-0.861135	-5.05039		0	0	0	0
chr2	164830732	164833456	-	Neurl2	ENSMUSG00000039873.4	2724	10	51	5	16		4	51	2	16	6	51	3	16		7.84332	12.5005	0.672455	4.65723		11.7649	18.7505	0.672443	6.98563		0	0	0	0
chr2	164832873	164841032	+	Ctsa	ENSMUSG00000017760.16	8159	3690	4264	3552	4045		3446	4264	3362	4045	244	4264	190	4045		80.8161	83.115	0.0404648	2.29882		5.72233	4.69716	-0.284814	-1.02517		0	0	0	0
chr2	164839518	164857711	-	Pltp	ENSMUSG00000017754.13	18193	393	858	253	558		65	858	61	558	328	858	192	558		7.57577	10.9319	0.529082	3.35615		38.2284	34.4086	-0.151877	-3.81983		1	0.0549662	2.53319	0.13924
chr2	164879304	164894454	+	Pcif1	ENSMUSG00000039849.5	15150	3997	7205	4305	7336		3284	7205	3640	7336	713	7205	665	7336		45.5795	49.6183	0.122489	4.03886		9.89591	9.06489	-0.126543	-0.83102		0	0	0	0
chr2	164891882	164911757	-	Zfp335	ENSMUSG00000039834.17	19875	4967	9552	5102	9585		1338	9552	1352	9585	3629	9552	3750	9585		14.0075	14.1054	0.0100414	0.0978353		37.992	39.1236	0.0423429	1.13159		0	0	0	0
chr2	164911354	164919953	+	Zfp335os	ENSMUSG00000085436.1	8599	72	1902	73	1701		41	1902	54	1701	31	1902	19	1701		2.15563	3.17461	0.558469	1.01898		1.62987	1.117	-0.545132	-0.512873		0	0	0	0
chr2	164940780	164955850	+	Mmp9	ENSMUSG00000017737.2	15070	62	73	29	41		57	73	27	41	5	73	2	41		78.0822	65.8537	-0.245729	-12.2285		6.84944	4.87828	-0.489614	-1.97116		0	0	0	0
chr2	164960802	164999731	+	Slc12a5	ENSMUSG00000017740.17	38929	19	88	13	75		16	88	8	75	3	88	5	75		18.1819	10.6668	-0.769378	-7.51513		3.4092	6.66679	0.967559	3.25759		1	0.0256878	2.61637	0.0672088
chr2	165000357	165034867	-	Ncoa5	ENSMUSG00000039804.15	34510	703	9789	733	10199		146	9789	190	10199	557	9789	543	10199		1.49147	1.86293	0.320837	0.371458		5.69006	5.32405	-0.0959194	-0.366009		0	0	0	0
chr2	165055627	165072948	+	Cd40	ENSMUSG00000017652.16	17321	83	310	49	240		76	310	33	240	7	310	16	240		24.5162	13.75	-0.834297	-10.7661		2.2581	6.66671	1.56187	4.40861		0	0	0	0
chr2	165111507	165234853	-	Cdh22	ENSMUSG00000053166.14	123346	4	60	0	41		0	60	0	41	4	60	0	41		0.000166666	0.000243902	0.549337	7.72355e-05		6.66682	0.000243902	-14.7384	-6.66658		1	0.00810728	2.75692	0.0223511
chr2	165276554	165287869	-	Slc35c2	ENSMUSG00000017664.16	11315	515	1331	610	1469		60	1331	83	1469	455	1331	527	1469		4.5079	5.65011	0.325824	1.14221		34.1848	35.8747	0.0696126	1.68992		0	0	0	0
chr2	165288031	165326479	-	Elmo2	ENSMUSG00000017670.16	38448	2321	6821	2550	7726		259	6821	287	7726	2062	6821	2263	7726		3.7971	3.71473	-0.0316398	-0.0823679		30.2302	29.2907	-0.0455462	-0.939465		0	0	0	0
chr2	165490110	165493324	-	Trp53rka	ENSMUSG00000039725.6	3214	24	283	42	308		4	283	14	308	20	283	28	308		1.41346	4.54549	1.6852	3.13202		7.06717	9.09094	0.363297	2.02377		0	0	0	0
chr2	165595032	165771727	+	Eya2	ENSMUSG00000017897.18	176695	465	6262	1063	12392		385	6262	945	12392	80	6262	118	12392		6.1482	7.62589	0.310742	1.47769		1.27755	0.952228	-0.423999	-0.325321		9	0.0509352	24.1282	0.136553
chr2	165784152	165899016	-	Zmynd8	ENSMUSG00000039671.18	114864	2306	14170	2933	17032		269	14170	354	17032	2037	14170	2579	17032		1.89838	2.07844	0.130735	0.180064		14.3754	15.1421	0.0749577	0.766644		0	0	0	0
chr2	165880025	165882056	+	Gm11465	ENSMUSG00000086820.1	2031	14	134	12	164		9	134	7	164	5	134	5	164		6.71649	4.26835	-0.654028	-2.44814		3.73142	3.04884	-0.291463	-0.682576		0	0	0	0
chr2	165992636	166073242	+	Ncoa3	ENSMUSG00000027678.17	80606	3738	16529	3690	15539		3335	16529	3344	15539	403	16529	346	15539		20.1767	21.52	0.0929939	1.34339		2.43814	2.22666	-0.130902	-0.211483		1	0.012406	2.52159	0.0312829
chr2	166073089	166155663	-	Sulf2	ENSMUSG00000006800.14	82574	98	424	93	372		12	424	10	372	86	424	83	372		2.83021	2.6882	-0.0742704	-0.142013		20.283	22.3118	0.137536	2.02881		1	0.0121103	2.55296	0.0309172
chr2	166566342	166713832	-	Prex1	ENSMUSG00000039621.13	147490	12792	37261	12236	36138		590	37261	639	36138	12202	37261	11597	36138		1.58343	1.76822	0.159251	0.184797		32.7474	32.0909	-0.0292163	-0.656503		7	0.0474608	19.2383	0.130438
chr2	166792531	166799505	+	Trp53rkb	ENSMUSG00000042854.9	6974	17	105	10	78		4	105	3	78	13	105	7	78		3.80962	3.84628	0.0138173	0.0366617		12.381	8.97448	-0.464232	-3.40656		2	0.286779	5.66266	0.811967
chr2	166805588	166898052	+	Arfgef2	ENSMUSG00000074582.10	92464	2957	10076	3003	9760		2755	10076	2819	9760	202	10076	184	9760		27.3422	28.8832	0.0791011	1.541		2.00476	1.88525	-0.0886795	-0.119518		2	0.02163	5.39819	0.0583815
chr2	166906040	166946389	+	Cse1l	ENSMUSG00000002718.14	40349	5657	11222	6438	11996		4857	11222	5642	11996	800	11222	796	11996		43.2811	47.0323	0.119918	3.75129		7.12885	6.63555	-0.103455	-0.493309		1	0.0247838	3.28273	0.0813584
chr2	166947549	166996299	-	Stau1	ENSMUSG00000039536.16	48750	1110	8220	1158	8506		159	8220	184	8506	951	8220	974	8506		1.93431	2.16318	0.161336	0.228872		11.5693	11.4507	-0.014866	-0.118602		2	0.0410256	5.19039	0.10647
chr2	167015193	167034947	+	Ddx27	ENSMUSG00000017999.16	19754	2605	3875	2630	4179		2494	3875	2513	4179	111	3875	117	4179		64.3613	60.134	-0.0980122	-4.22729		2.86452	2.79972	-0.0330127	-0.0648035		1	0.0506227	2.70898	0.137136
chr2	167035793	167063015	-	Znfx1	ENSMUSG00000039501.14	27222	851	2416	913	2557		125	2416	147	2557	726	2416	766	2557		5.17384	5.74893	0.152056	0.575083		30.0497	29.957	-0.00445687	-0.0926882		1	0.036735	2.6284	0.0965543
chr2	167095969	167190155	-	Kcnb1	ENSMUSG00000050556.9	94186	0	105	0	61		0	105	0	61	0	105	0	61		9.5238e-05	0.000163934	0.783507	6.86962e-05		9.5238e-05	0.000163934	0.783507	6.86962e-05		2	0.0212346	5.32189	0.056504
chr2	167298444	167349183	-	B4galt5	ENSMUSG00000017929.13	50739	173	3325	132	3104		21	3325	23	3104	152	3325	109	3104		0.631582	0.740983	0.23047	0.109401		4.57143	3.5116	-0.380517	-1.05983		1	0.0197087	2.72598	0.0537255
chr2	167421712	167477000	+	Slc9a8	ENSMUSG00000039463.14	55288	1096	10301	1341	10220		880	10301	1117	10220	216	10301	224	10220		8.54286	10.9296	0.355443	2.38669		2.09688	2.19178	0.0638566	0.094897		0	0	0	0
chr2	167481133	167492887	-	Spata2	ENSMUSG00000047030.15	11754	118	526	102	466		26	526	32	466	92	526	70	466		4.94298	6.86697	0.474292	1.92399		17.4905	15.0215	-0.219546	-2.46903		0	0	0	0
chr2	167492645	167516173	+	Rnf114	ENSMUSG00000006418.17	23528	2247	7451	2211	7405		2089	7451	2034	7405	158	7451	177	7405		28.0365	27.4679	-0.0295585	-0.568578		2.12052	2.39028	0.172759	0.269756		0	0	0	0
chr2	167538195	167542814	+	Snai1	ENSMUSG00000042821.7	4619	13	59	3	9		12	59	0	9	1	59	3	9		20.3391	0.0011111	-14.16	-20.338		1.69508	33.3341	4.29757	31.639		0	0	0	0
chr2	167553314	167607845	+	Gm11476	ENSMUSG00000085596.1	54531	28	217	8	67		16	217	4	67	12	217	4	67		7.37331	5.97029	-0.304512	-1.40302		5.53	5.97029	0.110522	0.440292		1	0.0183382	2.64486	0.048502
chr2	167607638	167632095	-	Ube2v1	ENSMUSG00000078923.10	24457	311	2285	291	2386		22	2285	32	2386	289	2285	259	2386		0.962805	1.34116	0.478166	0.378356		12.6477	10.855	-0.220517	-1.79272		1	0.0408881	2.79879	0.114437
chr2	167642608	167689822	-	Tmem189	ENSMUSG00000090213.1	47214	25	1732	31	1759		11	1732	12	1759	14	1732	19	1759		0.63511	0.682211	0.103213	0.0471018		0.80832	1.08016	0.418253	0.271845		5	0.105901	13.5266	0.286496
chr2	167662109	167667697	+	Gm14320	ENSMUSG00000085914.1	5588	22	109	16	110		8	109	8	110	14	109	8	110		7.33953	7.27281	-0.0131754	-0.066723		12.8441	7.27281	-0.820523	-5.57131		0	0	0	0
chr2	167691177	167729172	+	A530013C23Rik	ENSMUSG00000006462.6	37995	1	81	1	146		0	81	1	146	1	81	0	146		0.000123457	0.685	12.4379	0.684876		1.23469	6.84931e-05	-14.1378	-1.23462		3	0.0789578	7.74493	0.203841
chr2	167777467	167782569	+	Gm14321	ENSMUSG00000084797.1	5102	69	550	47	421		20	550	23	421	49	550	24	421		3.63638	5.46321	0.587244	1.82682		8.90911	5.70073	-0.644133	-3.20837		1	0.196002	2.7163	0.532399
chr2	167932057	167979385	+	Ptpn1	ENSMUSG00000027540.13	47328	1108	11500	1411	11032		951	11500	1279	11032	157	11500	132	11032		8.26957	11.5935	0.487438	3.32398		1.36522	1.19652	-0.190287	-0.168698		1	0.0211291	2.52174	0.0532822
chr2	167980164	168010618	-	Ripor3	ENSMUSG00000074577.9	30454	10	66	6	31		6	66	3	31	4	66	3	31		9.09105	9.67771	0.0902194	0.586664		6.06075	9.67771	0.67517	3.61696		3	0.0985092	8.17492	0.268435
chr2	168081004	168101203	+	Pard6b	ENSMUSG00000044641.7	20199	16	169	4	127		15	169	4	127	1	169	0	127		8.87579	3.14968	-1.49467	-5.72611		0.591775	7.87401e-05	-12.8757	-0.591696		0	0	0	0
chr2	168180986	168207112	-	Adnp	ENSMUSG00000051149.15	26126	315	2807	324	2923		109	2807	104	2923	206	2807	220	2923		3.88315	3.55799	-0.126165	-0.325161		7.3388	7.52652	0.0364384	0.187718		1	0.038276	2.79879	0.107127
chr2	168209048	168230591	-	Dpm1	ENSMUSG00000078919.10	21543	650	3148	652	2905		49	3148	39	2905	601	3148	613	2905		1.55655	1.34252	-0.213409	-0.214031		19.0915	21.1016	0.144419	2.01006		1	0.0464188	2.7337	0.126895
chr2	168476410	168601657	-	Nfatc2	ENSMUSG00000027544.16	125247	165	6447	144	5001		22	6447	26	5001	143	6447	118	5001		0.341246	0.519898	0.607418	0.178652		2.21809	2.35953	0.0891833	0.141443		5	0.0399211	14.1339	0.112848
chr2	168634438	168742409	-	Atp9a	ENSMUSG00000027546.15	107971	493	1311	209	508		23	1311	19	508	470	1311	190	508		1.75439	3.74018	1.09213	1.98578		35.8505	37.4016	0.0611062	1.55109		8	0.074094	22.1686	0.20532
chr2	168893331	168955587	-	Zfp64	ENSMUSG00000027551.15	62256	339	4390	280	4068		41	4390	57	4068	298	4390	223	4068		0.933943	1.40118	0.585238	0.467239		6.78816	5.48181	-0.308367	-1.30635		0	0	0	0
chr2	169633013	170071816	+	Tshz2	ENSMUSG00000047907.11	438803	0	60	3	31		0	60	0	31	0	60	3	31		0.000166666	0.00032258	0.952692	0.000155913		0.000166666	9.67771	15.8254	9.67754		9	0.0205103	24.1591	0.0550569
chr2	169633646	169888503	-	Gm26883	ENSMUSG00000096972.7	254857	2	311	0	125		2	311	0	125	0	311	0	125		0.643119	7.99999e-05	-12.9728	-0.643039		3.21543e-05	7.99999e-05	1.31499	4.78456e-05		5	0.0196188	13.8461	0.0543287
chr2	170108643	170148103	-	Zfp217	ENSMUSG00000052056.14	39460	673	5980	814	7339		83	5980	129	7339	590	5980	685	7339		1.38796	1.75773	0.340749	0.369772		9.86622	9.3337	-0.080049	-0.532524		4	0.101368	11.33	0.287127
chr2	170346991	170427845	-	Bcas1	ENSMUSG00000013523.13	80854	12	106	7	31		3	106	3	31	9	106	4	31		2.83028	9.67771	1.77372	6.84743		8.49065	12.9035	0.603816	4.41285		1	0.012368	2.79879	0.0346154
chr2	170496428	170519123	+	Pfdn4	ENSMUSG00000052033.13	22695	471	1098	479	1088		416	1098	426	1088	55	1098	53	1088		37.8871	39.1544	0.0474694	1.26734		5.00912	4.87133	-0.0402397	-0.137784		0	0	0	0
chr2	172345565	172355749	+	Fam210b	ENSMUSG00000027495.4	10184	20	86	31	74		17	86	30	74	3	86	1	74		19.7675	40.5406	1.03624	20.7731		3.48848	1.35148	-1.36806	-2.137		0	0	0	0
chr2	172356190	172370535	-	Aurka	ENSMUSG00000027496.15	14345	1216	3469	1748	5108		101	3469	134	5108	1115	3469	1614	5108		2.9115	2.62334	-0.150361	-0.288167		32.1418	31.5975	-0.0246418	-0.544334		1	0.0697107	2.53844	0.176956
chr2	172370681	172382448	+	Cstf1	ENSMUSG00000027498.14	11767	933	2929	1057	3074		850	2929	980	3074	83	2929	77	3074		29.0201	31.8803	0.13561	2.86014		2.83373	2.50488	-0.177962	-0.328852		0	0	0	0
chr2	172393794	172433757	+	Cass4	ENSMUSG00000074570.14	39963	155	1567	169	2033		117	1567	148	2033	38	1567	21	2033		7.4665	7.27989	-0.0365166	-0.186616		2.42502	1.03296	-1.23121	-1.39206		1	0.0250231	2.86388	0.0716633
chr2	172440556	172469908	+	Rtf2	ENSMUSG00000027502.11	29352	3112	7036	2927	7624		2974	7036	2800	7624	138	7036	127	7624		42.2683	36.7261	-0.20277	-5.54221		1.96134	1.66579	-0.235632	-0.29555		0	0	0	0
chr2	172450313	172458596	-	Gcnt7	ENSMUSG00000074569.4	8283	106	2032	106	2080		69	2032	70	2080	37	2032	36	2080		3.39567	3.36539	-0.0129246	-0.0302848		1.82087	1.73077	-0.0732114	-0.090097		0	0	0	0
chr2	172472520	172474331	+	Fam209	ENSMUSG00000027505.2	1811	33	221	18	226		14	221	4	226	19	221	14	226		6.33488	1.76995	-1.83961	-4.56493		8.59733	6.19473	-0.472846	-2.40259		0	0	0	0
chr2	172868012	172940321	-	Bmp7	ENSMUSG00000008999.7	72309	115	1874	233	4048		9	1874	13	4048	106	1874	220	4048		0.480261	0.321149	-0.580579	-0.159113		5.65636	5.43478	-0.0576497	-0.22157		5	0.0691477	13.0609	0.180626
chr2	172977700	172993576	+	Spo11	ENSMUSG00000005883.15	15876	3335	8193	2313	5440		2949	8193	2060	5440	386	8193	253	5440		35.9941	37.8676	0.0732037	1.87351		4.71134	4.65074	-0.0186781	-0.0606031		2	0.125976	5.06897	0.319285
chr2	173000117	173015739	+	Rae1	ENSMUSG00000027509.11	15622	1936	5886	2190	5851		1773	5886	2031	5851	163	5886	159	5851		30.1223	34.712	0.204602	4.58969		2.76928	2.71749	-0.0272409	-0.0517988		0	0	0	0
chr2	173093609	173119525	-	Ctcfl	ENSMUSG00000070495.11	25916	4	84	5	43		4	84	3	43	0	84	2	43		4.76202	6.97696	0.551026	2.21494		0.000119047	4.65138	15.2538	4.65127		2	0.0771724	5.26544	0.203173
chr2	173206612	173218923	-	Zbp1	ENSMUSG00000027514.14	12311	777	2107	1207	3463		87	2107	141	3463	690	2107	1066	3463		4.1291	4.07162	-0.0202248	-0.0574811		32.748	30.7826	-0.0892929	-1.96543		2	0.162456	5.86306	0.476246
chr2	173224458	173276533	-	Pmepa1	ENSMUSG00000038400.15	52075	202	6627	134	6192		34	6627	25	6192	168	6627	109	6192		0.513054	0.403748	-0.345655	-0.109306		2.53509	1.76034	-0.526182	-0.774748		3	0.0576092	8.19181	0.157308
chr2	173579320	173659640	-	Ppp4r1l-ps	ENSMUSG00000055897.13	80320	415	4992	708	6361		144	4992	178	6361	271	4992	530	6361		2.88462	2.7983	-0.0438274	-0.0863136		5.42869	8.33202	0.618064	2.90334		0	0	0	0
chr2	173659760	173707343	+	Rab22a	ENSMUSG00000027519.10	47583	894	10521	969	11831		803	10521	862	11831	91	10521	107	11831		7.63236	7.28594	-0.0670123	-0.346411		0.864938	0.904405	0.0643719	0.0394668		0	0	0	0
chr2	173737511	173784336	+	Vapb	ENSMUSG00000054455.4	46825	607	6718	959	6718		538	6718	883	6718	69	6718	76	6718		8.00834	13.1438	0.714807	5.13546		1.02709	1.13129	0.139403	0.104198		1	0.0213561	2.60353	0.0556013
chr2	173793437	173847670	-	Gm14371	ENSMUSG00000085938.1	54233	3	93	3	90		2	93	1	90	1	93	2	90		2.15064	1.11122	-0.952622	-1.03942		1.07538	2.22233	1.04723	1.14696		1	0.018439	2.66861	0.0492064
chr2	174076308	174099771	+	Stx16	ENSMUSG00000027522.15	23463	3458	18831	3735	19644		2499	18831	2698	19644	959	18831	1037	19644		13.2707	13.7345	0.0495603	0.463803		5.09267	5.27897	0.051834	0.186299		0	0	0	0
chr2	174110349	174123070	+	Npepl1	ENSMUSG00000039263.16	12721	1097	2498	1465	3293		973	2498	1308	3293	124	2498	157	3293		38.9512	39.7206	0.0282218	0.769458		4.96397	4.76769	-0.0582048	-0.196283		0	0	0	0
chr2	174281237	174295436	-	Nespas	ENSMUSG00000086537.7	14199	36	290	41	376		6	290	5	376	30	290	36	376		2.069	1.32981	-0.637709	-0.739186		10.3449	9.57449	-0.111646	-0.770366		0	0	0	0
chr2	174284320	174346744	+	Gnas	ENSMUSG00000027523.19	62424	1984	2507	2384	3044		939	2507	1156	3044	1045	2507	1228	3044		37.4551	37.9763	0.019938	0.521221		41.6833	40.3417	-0.0471988	-1.34163		6	0.0961169	16.272	0.260669
chr2	174330319	174346712	-	Gm20721	ENSMUSG00000090625.1	16393	162	86	170	89		77	86	82	89	85	86	88	89		89.5349	92.1348	0.0412967	2.59994		98.8372	98.8764	0.000572005	0.0391951		0	0	0	0
chr2	174415804	174427502	+	Nelfcd	ENSMUSG00000016253.12	11698	1938	3411	2032	3540		1779	3411	1880	3540	159	3411	152	3540		52.1548	53.1073	0.0261115	0.952551		4.66139	4.29379	-0.11851	-0.367604		1	0.0854847	2.70646	0.231361
chr2	174427493	174439039	-	Ctsz	ENSMUSG00000016256.10	11546	1416	2557	1219	2276		49	2557	47	2276	1367	2557	1172	2276		1.91631	2.06503	0.107831	0.148719		53.4611	51.4939	-0.0540891	-1.96724		0	0	0	0
chr2	174461072	174464105	-	Atp5e	ENSMUSG00000016252.7	3033	1039	1226	989	1139		7	1226	7	1139	1032	1226	982	1139		0.570971	0.614583	0.106191	0.0436123		84.1762	86.216	0.0345432	2.0398		0	0	0	0
chr2	174465067	174473081	-	Prelid3b	ENSMUSG00000016257.15	8014	1512	2940	1716	3218		111	2940	115	3218	1401	2940	1601	3218		3.77551	3.57365	-0.079274	-0.201862		47.6531	49.7514	0.0621682	2.09834		2	0.249563	5.56672	0.694624
chr2	174643534	174710832	+	Zfp831	ENSMUSG00000050600.5	67298	106	5811	114	5649		73	5811	72	5649	33	5811	42	5649		1.25624	1.27456	0.0208914	0.0183237		0.56789	0.743496	0.388713	0.175606		2	0.0297186	5.33552	0.079282
chr2	175129493	175142012	-	Gm14399	ENSMUSG00000090093.8	12519	60	528	150	1170		27	528	36	1170	33	528	114	1170		5.11365	3.07693	-0.732862	-2.03672		6.25002	9.7436	0.640594	3.49358		0	0	0	0
chr2	175166255	175175871	-	Gm14443	ENSMUSG00000078902.3	9616	8	106	11	196		2	106	5	196	6	106	6	196		1.88689	2.55107	0.435096	0.664185		5.66047	3.06127	-0.886789	-2.59919		0	0	0	0
chr2	175191065	175206917	-	Gm14391	ENSMUSG00000078903.10	15852	40	146	48	153		1	146	2	153	39	146	46	153		0.685	1.30725	0.932365	0.622255		26.7124	30.0654	0.170596	3.35303		0	0	0	0
chr2	175321955	175338197	-	Gm4631	ENSMUSG00000078899.9	16242	45	50	46	67		0	50	1	67	45	50	45	67		0.0002	1.49268	12.8656	1.49248		90	67.1642	-0.422232	-22.8358		0	0	0	0
chr2	175469985	175482171	+	Zfp965	ENSMUSG00000078896.11	12186	12	70	12	70		10	70	10	70	2	70	2	70		14.2858	14.2858	3.20343e-16	9.9476e-14		2.85728	2.85728	0	0		0	0	0	0
chr2	175789357	175801093	-	Gm14288	ENSMUSG00000078889.11	11736	29	58	40	85		1	58	0	85	28	58	40	85		1.72431	0.000117647	-13.8393	-1.72419		48.276	47.0589	-0.0368375	-1.21707		0	0	0	0
chr2	176670522	176719085	+	Zfp973	ENSMUSG00000078879.10	48563	13	190	59	484		12	190	49	484	1	190	10	484		6.31584	10.124	0.680731	3.80815		0.526368	2.06614	1.97279	1.53977		0	0	0	0
chr2	176708328	176721813	+	Gm14305	ENSMUSG00000078878.9	13485	155	693	372	1908		84	693	225	1908	71	693	147	1908		12.1212	11.7925	-0.0396711	-0.328767		10.2453	7.70441	-0.41121	-2.54092		0	0	0	0
chr2	176798612	176811223	+	Gm14295	ENSMUSG00000078877.11	12611	17	110	28	185		15	110	25	185	2	110	3	185		13.6364	13.5136	-0.0130595	-0.122882		1.81827	1.62167	-0.165083	-0.196596		0	0	0	0
chr2	176892509	176927809	-	Gm14296	ENSMUSG00000074527.11	35300	46	162	76	234		3	162	1	234	43	162	75	234		1.85191	0.427393	-2.11538	-1.42452		26.5433	32.0513	0.272038	5.50806		0	0	0	0
chr2	177183453	177206421	-	Gm14410	ENSMUSG00000078870.9	22968	183	1530	361	2819		31	1530	61	2819	152	1530	300	2819		2.02615	2.16389	0.094887	0.137741		9.93465	10.6421	0.0992389	0.707428		0	0	0	0
chr2	177464733	177478129	+	Zfp970	ENSMUSG00000078866.10	13396	67	499	71	604		33	499	34	604	34	499	37	604		6.61325	5.62915	-0.23244	-0.98409		6.81365	6.12584	-0.153519	-0.687803		0	0	0	0
chr2	177498215	177509763	+	Gm14403	ENSMUSG00000094786.1	11548	17	162	42	305		11	162	30	305	6	162	12	305		6.79018	9.8361	0.534636	3.04591		3.70376	3.93446	0.087173	0.230695		0	0	0	0
chr2	177759288	177770472	+	Gm14322	ENSMUSG00000078864.10	11184	10	54	9	48		6	54	7	48	4	54	2	48		11.1113	14.5835	0.392314	3.47224		7.40758	4.16687	-0.830039	-3.24071		0	0	0	0
chr2	177831791	177840336	-	Gm14325	ENSMUSG00000095362.7	8545	147	1031	188	1189		24	1031	27	1189	123	1031	161	1189		2.32785	2.27082	-0.03578	-0.0570225		11.9302	13.5408	0.182698	1.61062		0	0	0	0
chr2	177903340	177925613	-	Zfp972	ENSMUSG00000074529.10	22273	23	123	33	145		5	123	5	145	18	123	28	145		4.06512	3.44834	-0.237394	-0.616776		14.6342	19.3104	0.400033	4.67618		0	0	0	0
chr2	177935993	177957297	-	Gm14326	ENSMUSG00000078862.10	21304	123	1900	213	2860		18	1900	37	2860	105	1900	176	2860		0.947374	1.29371	0.449509	0.346336		5.52632	6.15385	0.15517	0.627529		0	0	0	0
chr2	178023284	178034022	+	Zfp971	ENSMUSG00000074519.11	10738	95	254	103	253		71	254	79	253	24	254	24	253		27.9528	31.2253	0.159725	3.27254		9.44885	9.4862	0.00569111	0.0373472		0	0	0	0
chr2	178023808	178028736	-	Gm26869	ENSMUSG00000097879.1	4928	41	404	30	409		6	404	9	409	35	404	21	409		1.48517	2.20051	0.567209	0.71534		8.66339	5.1345	-0.754708	-3.52889		0	0	0	0
chr2	178067695	178078476	-	Zfp931	ENSMUSG00000078861.8	10781	32	427	113	662		16	427	49	662	16	427	64	662		3.7471	7.40183	0.982109	3.65473		3.7471	9.66769	1.3674	5.92059		0	0	0	0
chr2	179442431	179899373	+	Cdh4	ENSMUSG00000000305.12	456942	7	239	1	69		6	239	0	69	1	239	1	69		2.5105	0.000144927	-14.0804	-2.51036		0.418452	1.44942	1.79234	1.03097		9	0.0196962	24.8777	0.054444
chr2	179912152	179976646	-	Taf4	ENSMUSG00000039117.16	64494	1248	14167	1266	13768		136	14167	107	13768	1112	14167	1159	13768		0.959978	0.777165	-0.30478	-0.182813		7.84923	8.41807	0.100939	0.568844		0	0	0	0
chr2	179975993	179979013	+	4921531C22Rik	ENSMUSG00000085704.1	3020	14	81	22	99		7	81	13	99	7	81	9	99		8.64209	13.1314	0.603569	4.48931		8.64209	9.091	0.0730592	0.448913		0	0	0	0
chr2	180024987	180035465	+	Lsm14b	ENSMUSG00000039108.14	10478	2061	5257	1706	4467		1774	5257	1445	4467	287	5257	261	4467		33.7455	32.3483	-0.061003	-1.39715		5.45939	5.84285	0.0979326	0.38346		1	0.0954381	2.79879	0.267111
chr2	180036374	180042433	-	Psma7	ENSMUSG00000027566.15	6059	1549	3092	1613	2907		94	3092	86	2907	1455	3092	1527	2907		3.04011	2.95838	-0.0393147	-0.081727		47.0569	52.5284	0.15869	5.47146		0	0	0	0
chr2	180042509	180070201	+	Ss18l1	ENSMUSG00000039086.9	27692	297	2297	196	1568		230	2297	164	1568	67	2297	32	1568		10.0131	10.4592	0.0628875	0.446125		2.91685	2.04082	-0.515262	-0.87603		1	0.0361115	2.63907	0.0953008
chr2	180070588	180085902	+	Mtg2	ENSMUSG00000039069.19	15314	500	1775	372	1405		433	1775	333	1405	67	1775	39	1405		24.3944	23.7011	-0.0415959	-0.693297		3.77465	2.77581	-0.443437	-0.998846		0	0	0	0
chr2	180099465	180104488	-	Hrh3	ENSMUSG00000039059.11	5023	24	89	2	8		18	89	0	8	6	89	2	8		20.2248	0.00124998	-13.9819	-20.2236		6.74168	25.0009	1.8908	18.2593		0	0	0	0
chr2	180119306	180162680	+	Osbpl2	ENSMUSG00000039050.8	43374	1068	5384	1092	4993		966	5384	991	4993	102	5384	101	4993		17.9421	19.8478	0.145633	1.90574		1.8945	2.02283	0.0945577	0.12833		0	0	0	0
chr2	180171485	180176286	+	Adrm1	ENSMUSG00000039041.15	4801	379	417	361	386		360	417	342	386	19	417	19	386		86.3309	88.601	0.0374459	2.2701		4.55638	4.9223	0.111447	0.365927		0	0	0	0
chr2	180176373	180225859	-	Lama5	ENSMUSG00000015647.9	49486	138	176	82	110		62	176	41	110	76	176	41	110		35.2273	37.2728	0.0814283	2.04547		43.1819	37.2728	-0.212302	-5.90907		0	0	0	0
chr2	180257377	180258445	+	Rps21	ENSMUSG00000039001.12	1068	3523	13838	3561	13334		3507	13838	3533	13334	16	13838	28	13334		25.3433	26.4962	0.0641821	1.15292		0.115624	0.20999	0.860877	0.0943659		0	0	0	0
chr2	180258540	180273496	-	Cables2	ENSMUSG00000038990.14	14956	315	1280	291	1218		67	1280	57	1218	248	1280	234	1218		5.23438	4.67981	-0.161569	-0.554572		19.375	19.2118	-0.0122019	-0.163177		0	0	0	0
chr2	180456245	180474867	+	Slco4a1	ENSMUSG00000038963.15	18622	152	618	82	338		119	618	66	338	33	618	16	338		19.2557	19.5267	0.0201607	0.270975		5.33982	4.73376	-0.173806	-0.606065		0	0	0	0
chr2	180581304	180586304	+	Mrgbp	ENSMUSG00000027569.15	5000	221	417	219	421		187	417	189	421	34	417	30	421		44.8441	44.8931	0.00157511	0.0489868		8.1535	7.12591	-0.194345	-1.02759		1	0.2	2.89985	0.57997
chr2	180589245	180595836	+	Ogfr	ENSMUSG00000049401.10	6591	2033	3418	2115	3434		1853	3418	1903	3434	180	3418	212	3434		54.213	55.4164	0.031675	1.20343		5.26624	6.17356	0.22933	0.907321		0	0	0	0
chr2	180597790	180622189	+	Col9a3	ENSMUSG00000027570.15	24399	245	675	188	554		188	675	126	554	57	675	62	554		27.8519	22.7437	-0.292307	-5.10817		8.44446	11.1914	0.406308	2.74689		0	0	0	0
chr2	180657964	180709999	-	Dido1	ENSMUSG00000038914.15	52035	3920	19414	3996	18581		760	19414	875	18581	3160	19414	3121	18581		3.9147	4.70911	0.266553	0.794411		16.2769	16.7967	0.045353	0.519814		1	0.0192178	2.56701	0.0493324
chr2	180710117	180718733	+	Gid8	ENSMUSG00000027573.11	8616	665	1606	721	1661		589	1606	638	1661	76	1606	83	1661		36.675	38.4106	0.0667086	1.73563		4.73226	4.997	0.0785316	0.264736		0	0	0	0
chr2	180725263	180742280	+	Slc17a9	ENSMUSG00000023393.15	17017	221	841	184	715		171	841	137	715	50	841	47	715		20.3329	19.1609	-0.0856577	-1.1721		5.94531	6.57344	0.144895	0.628125		1	0.0587648	2.66861	0.15682
chr2	180904377	180920949	-	Ythdf1	ENSMUSG00000038848.14	16572	688	4591	762	4607		78	4591	84	4607	610	4591	678	4607		1.69898	1.82331	0.101896	0.124336		13.2869	14.7167	0.147457	1.42987		0	0	0	0
chr2	180967225	180982526	+	Arfgap1	ENSMUSG00000027575.19	15301	1626	4740	1629	4743		1367	4740	1384	4743	259	4740	245	4743		28.8397	29.1798	0.0169179	0.340182		5.46414	5.16551	-0.0810831	-0.298628		0	0	0	0
chr2	180986535	181018363	+	Col20a1	ENSMUSG00000016356.18	31828	242	1216	450	1531		159	1216	346	1531	83	1216	104	1531		13.0757	22.5996	0.789414	9.52395		6.82567	6.79295	-0.00693109	-0.0327137		0	0	0	0
chr2	181187247	181188771	+	Ppdpf	ENSMUSG00000016344.14	1524	350	347	295	289		316	347	260	289	34	347	35	289		91.0663	89.9654	-0.0175468	-1.10088		9.7983	12.1108	0.305686	2.31246		0	0	0	0
chr2	181227615	181242027	-	Helz2	ENSMUSG00000027580.17	14412	1372	1718	1168	1653		142	1718	102	1653	1230	1718	1066	1653		8.26543	6.1706	-0.421678	-2.09483		71.5949	64.4888	-0.150808	-7.10607		1	0.0693866	2.56796	0.178182
chr2	181251449	181288035	-	Gmeb2	ENSMUSG00000038705.13	36586	721	5626	749	6329		174	5626	212	6329	547	5626	537	6329		3.09279	3.34966	0.115109	0.256877		9.72272	8.48475	-0.196487	-1.23796		0	0	0	0
chr2	181306459	181314500	-	Stmn3	ENSMUSG00000027581.12	8041	15	106	22	158		6	106	9	158	9	106	13	158		5.66047	5.69626	0.00909464	0.0357959		8.49065	8.22791	-0.0453501	-0.262746		0	0	0	0
chr2	181319739	181356616	+	Rtel1	ENSMUSG00000038685.18	36877	2873	5662	3083	6095		2544	5662	2732	6095	329	5662	351	6095		44.9311	44.8236	-0.00345566	-0.107494		5.81067	5.75882	-0.0129311	-0.051849		3	0.0813515	7.79647	0.211418
chr2	181357690	181365404	-	Arfrp1	ENSMUSG00000038671.15	7714	662	2038	721	2043		98	2038	117	2043	564	2038	604	2043		4.80864	5.72688	0.252119	0.918236		27.6742	29.5644	0.0953182	1.89018		0	0	0	0
chr2	181364928	181383628	+	Zgpat	ENSMUSG00000027582.16	18700	558	2203	796	2175		512	2203	752	2175	46	2203	44	2175		23.241	34.5747	0.573043	11.3337		2.08807	2.02299	-0.0456761	-0.0650732		0	0	0	0
chr2	181380078	181383628	+	Lime1	ENSMUSG00000090077.9	3550	677	712	601	633		554	712	459	633	123	712	142	633		77.809	72.5119	-0.10172	-5.29714		17.2753	22.4329	0.376904	5.15758		0	0	0	0
chr2	181384250	181387586	+	Slc2a4rg-ps	ENSMUSG00000085028.2	3336	253	389	241	381		127	389	133	381	126	389	108	381		32.6478	34.9082	0.0965768	2.26032		32.3908	28.3465	-0.192413	-4.04429		0	0	0	0
chr2	181387762	181459426	-	Zbtb46	ENSMUSG00000027583.13	71664	22	526	16	426		12	526	11	426	10	526	5	426		2.28139	2.58218	0.17868	0.300795		1.90116	1.17373	-0.695776	-0.727427		1	0.013954	2.92897	0.0408709
chr2	181497142	181517966	+	Tpd52l2	ENSMUSG00000000827.18	20824	942	3113	1198	3208		852	3113	1106	3208	90	3113	92	3208		27.3691	34.4763	0.333057	7.10721		2.8911	2.86783	-0.0116597	-0.0232715		0	0	0	0
chr2	181520485	181555133	+	Dnajc5	ENSMUSG00000000826.16	34648	2033	16190	2103	15537		1672	16190	1771	15537	361	16190	332	15537		10.3274	11.3986	0.142384	1.07123		2.22977	2.13684	-0.0614205	-0.0929368		0	0	0	0
chr2	181569149	181584892	-	Uckl1	ENSMUSG00000089917.7	15743	1403	1773	1188	1541		245	1773	222	1541	1158	1773	966	1541		13.8184	14.4062	0.0601037	0.587843		65.313	62.6866	-0.0592145	-2.62646		0	0	0	0
chr2	181578480	181585170	+	Uckl1os	ENSMUSG00000010492.10	6690	70	408	59	295		42	408	26	295	28	408	33	295		10.2941	8.81359	-0.224022	-1.48055		6.86277	11.1865	0.704892	4.3237		0	0	0	0
chr2	181582103	181592803	-	Zfp512b	ENSMUSG00000000823.16	10700	1287	1856	1010	1440		172	1856	130	1440	1115	1856	880	1440		9.26725	9.02778	-0.0377688	-0.239462		60.0754	61.1111	0.0246596	1.03568		0	0	0	0
chr2	181591868	181655660	+	Prpf6	ENSMUSG00000002455.14	63792	4016	8412	4083	8480		3849	8412	3935	8480	167	8412	148	8480		45.7561	46.4033	0.0202645	0.647239		1.98526	1.74528	-0.185866	-0.239976		0	0	0	0
chr2	181595218	181599212	-	Samd10	ENSMUSG00000038605.11	3994	74	203	93	235		26	203	41	235	48	203	52	235		12.8079	17.4468	0.445929	4.63892		23.6454	22.1277	-0.0957039	-1.51767		0	0	0	0
chr2	181680310	181688071	+	Tcea2	ENSMUSG00000059540.15	7761	339	974	280	837		202	974	164	837	137	974	116	837		20.7392	19.5938	-0.0819652	-1.14543		14.0657	13.859	-0.0213568	-0.206687		0	0	0	0
chr2	181688419	181693977	-	Rgs19	ENSMUSG00000002458.13	5558	934	4954	905	4558		310	4954	296	4558	624	4954	609	4558		6.25757	6.49408	0.0535219	0.236507		12.5959	13.3611	0.0850891	0.765241		0	0	0	0
chr2	181837854	181857461	+	Pcmtd2	ENSMUSG00000027589.14	19607	2091	12330	1948	11083		1839	12330	1682	11083	252	12330	266	11083		14.9148	15.1764	0.0250806	0.261555		2.0438	2.40007	0.231827	0.356277		0	0	0	0
chr2	181864337	181870830	+	Polr3k	ENSMUSG00000038628.8	6493	541	918	559	906		528	918	549	906	13	918	10	906		57.5163	60.596	0.0752513	3.07969		1.41613	1.10376	-0.359525	-0.312369		0	0	0	0
chr3	5560188	5576239	-	Pex2	ENSMUSG00000040374.13	16051	537	3084	486	2527		73	3084	81	2527	464	3084	405	2527		2.36706	3.20539	0.437402	0.838327		15.0454	16.0269	0.0911742	0.981514		0	0	0	0
chr3	7366669	7445366	+	Pkia	ENSMUSG00000027499.12	78697	1	73	2	22		1	73	2	22	0	73	0	22		1.37	9.09132	2.73032	7.72132		0.000136986	0.000454543	1.73039	0.000317557		0	0	0	0
chr3	7503483	7553836	+	Zc2hc1a	ENSMUSG00000043542.12	50353	20	324	25	235		15	324	23	235	5	324	2	235		4.62966	9.78727	1.08	5.15761		1.54324	0.851106	-0.858552	-0.692134		0	0	0	0
chr3	7569994	7613760	-	Il7	ENSMUSG00000040329.14	43766	11	203	4	92		6	203	4	92	5	203	0	92		2.95571	4.34793	0.556823	1.39222		2.4631	0.000108696	-14.4679	-2.46299		0	0	0	0
chr3	7612705	7690001	+	Gm16685	ENSMUSG00000097804.1	77296	1	157	0	48		0	157	0	48	1	157	0	48		6.36942e-05	0.000208333	1.70966	0.000144639		0.637006	0.000208333	-11.5782	-0.636798		0	0	0	0
chr3	8802146	8923918	-	Mrps28	ENSMUSG00000040269.5	121772	7	1196	163	1256		5	1196	3	1256	2	1196	160	1256		0.418069	0.238861	-0.807565	-0.179207		0.167232	12.7389	6.25124	12.5716		0	0	0	0
chr3	8925593	9004723	-	Tpd52	ENSMUSG00000027506.15	79130	264	2326	161	1457		55	2326	35	1457	209	2326	126	1457		2.36458	2.4022	0.022775	0.0376244		8.98539	8.64791	-0.0552286	-0.337474		2	0.0252749	5.72776	0.0723842
chr3	9250602	9285333	+	Zbtb10	ENSMUSG00000069114.8	34731	28	307	27	245		24	307	19	245	4	307	8	245		7.81762	7.75514	-0.0115766	-0.0624799		1.30296	3.26535	1.32544	1.96238		1	0.0287927	2.99405	0.0862068
chr3	9403064	9437233	+	C030034L19Rik	ENSMUSG00000097365.7	34169	53	978	29	517		25	978	15	517	28	978	14	517		2.55625	2.90137	0.182708	0.345126		2.863	2.70795	-0.0803248	-0.155046		1	0.0292663	2.7337	0.0800053
chr3	9427020	9610085	-	Zfp704	ENSMUSG00000040209.12	183065	308	7410	587	13962		76	7410	95	13962	232	7410	492	13962		1.02564	0.680419	-0.592032	-0.345223		3.13091	3.52385	0.170573	0.392946		3	0.0163876	7.87567	0.0430212
chr3	9687479	9833679	-	Pag1	ENSMUSG00000027508.15	146200	1888	66156	1601	54788		219	66156	180	54788	1669	66156	1421	54788		0.331036	0.328539	-0.0109218	-0.00249661		2.52282	2.59363	0.0399347	0.0708088		1	0.00683995	2.52433	0.0172663
chr3	9757607	9786142	+	Gm16337	ENSMUSG00000089794.1	28535	108	17744	88	14981		61	17744	44	14981	47	17744	44	14981		0.343779	0.293706	-0.227107	-0.0500727		0.264879	0.293706	0.14904	0.0288272		0	0	0	0
chr3	10012548	10016607	+	Fabp5	ENSMUSG00000027533.10	4059	269	1879	370	2401		267	1879	367	2401	2	1879	3	2401		14.2097	15.2853	0.10527	1.07561		0.106445	0.124952	0.231268	0.0185072		0	0	0	0
chr3	10244209	10301183	-	Fabp12	ENSMUSG00000027530.15	56974	3	65	0	42		1	65	0	42	2	65	0	42		1.53861	0.000238095	-12.6578	-1.53837		3.07707	0.000238095	-13.6577	-3.07683		1	0.0175519	2.7337	0.0479815
chr3	10311956	10331439	-	Impa1	ENSMUSG00000027531.16	19483	1574	4258	1594	4219		75	4258	53	4219	1499	4258	1541	4219		1.76139	1.25622	-0.487623	-0.505168		35.2043	36.5252	0.0531413	1.32092		0	0	0	0
chr3	10321712	10335681	-	Gm38303	ENSMUSG00000103392.1	13969	364	601	363	633		6	601	5	633	358	601	358	633		0.998353	0.789905	-0.33787	-0.208447		59.5674	56.5561	-0.0748405	-3.01131		0	0	0	0
chr3	10339953	10351317	-	Zfand1	ENSMUSG00000039795.14	11364	204	680	194	654		68	680	52	654	136	680	142	654		10	7.95108	-0.330778	-2.04893		20	21.7126	0.118528	1.71254		0	0	0	0
chr3	10417817	10440102	-	Snx16	ENSMUSG00000027534.16	22285	48	124	47	111		1	124	6	111	47	124	41	111		0.806532	5.40549	2.74462	4.59896		37.9033	36.937	-0.0372561	-0.966282		0	0	0	0
chr3	14533788	14572658	+	Lrrcc1	ENSMUSG00000027550.14	38870	1474	4983	1722	5870		1328	4983	1559	5870	146	4983	163	5870		26.6506	26.5588	-0.00498016	-0.0918389		2.92996	2.77683	-0.0774424	-0.153131		0	0	0	0
[truncated: 12,078 more rows]
