# Supplementary material for: A novel SATB1 protein isoform with different biophysical properties
Source: Front Cell Dev Biol. 2023 Aug 11;11:1242481. doi: 10.3389/fcell.2023.1242481 (PMC10457122; doi:10.3389/fcell.2023.1242481)
Supplement: Supplementary file 5 [file DataSheet1.xlsx]

## Sheet: Identified proteins
				Number of peptides detected								Protein abundance (after normalization and missing value imputation)
Protein name	Gene name	Accession Num.	Network Cluster	IgG_bio1	IgG_bio2	IgG_bio3	IgG_bio4	Satb1_bio1	Satb1_bio2	Satb1_bio3	Satb1_bio4	IgG_bio1	IgG_bio2	IgG_bio3	IgG_bio4	Satb1_bio1	Satb1_bio2	Satb1_bio3	Satb1_bio4	fold_change	pval	adj_pval	Frequency group	Enrichment group
Isoform 1 of RNA-binding protein Raly OS=Mus musculus GN=Raly	Raly	Q64012	2				1	3			1	242328	1.67422e+06	389815	332137	5.74155e+06	3.66535e+06	8.93934e+06	7.27734e+06	9.71141	0.00164451	0.00929515	commonly detected	enriched
Non-POU domain-containing octamer-binding protein OS=Mus musculus GN=Nono PE=1 SV=3	Nono	Q99K48	2		17		3		33		17	6.21763e+08	4.79064e+08	2.09526e+08	1.91263e+08	1.09602e+09	7.32131e+08	1.08598e+09	1.02145e+09	2.62089	0.0131958	0.039458	commonly detected	enriched
SNW domain-containing protein 1 OS=Mus musculus GN=Snw1 PE=1 SV=3	Snw1	Q9CSN1	2		3	1		3	7			1.49764e+06	3.87384e+06	1.66155e+06	1.89989e+06	4.483e+06	5.91299e+06	1.1772e+07	6.71359e+06	3.23317	0.00703494	0.0241085	commonly detected	enriched
Isoform 2 of SAFB-like transcription modulator OS=Mus musculus GN=Sltm	Sltm	Q8CH25	2	1				7			3	2.56372e+06	2.87312e+06	8.45297e+06	6.84387e+06	1.32237e+07	1.18839e+07	1.78422e+07	1.90381e+07	2.98972	0.00955417	0.0306739	commonly detected	enriched
Nuclear factor related to kappa-B-binding protein OS=Mus musculus GN=Nfrkb PE=2 SV=1	Nfrkb	Q6PIJ4	4		1				5			239294	380554	111644	129460	1.09383e+06	1.02014e+06	839527	832050	4.39693	0.00156317	0.00929515	commonly detected	enriched
Myb-binding protein 1A OS=Mus musculus GN=Mybbp1a PE=1 SV=2	Mybbp1a	Q7TPV4	1		1			2	4			1.28124e+06	339660	319467	497070	3.43328e+06	1.34349e+06	1.57698e+06	3.01576e+06	3.84401	0.0109035	0.0332558	commonly detected	enriched
DNA-binding protein SATB1 OS=Mus musculus GN=Satb1 PE=1 SV=2	Satb1	Q60611	1		1		1	23	62	4	24	731625	496801	686278	949015	1.4819e+09	2.99791e+09	1.33055e+09	2.63871e+09	2950.38	5.41407e-08	1.65129e-05	commonly detected	enriched
KAT8 regulatory NSL complex subunit 3 OS=Mus musculus GN=Kansl3 PE=2 SV=1	Kansl3	A2RSY1	1		2				5			482444	406693	559232	1.67637e+06	3.28484e+06	2.49177e+06	1.59851e+06	5.37973e+06	4.08189	0.0108565	0.0332558	commonly detected	enriched
Protein HIRA OS=Mus musculus GN=Hira PE=1 SV=3	Hira	Q61666	1		1				3			472998	181626	571011	316960	2.14507e+06	2.28011e+06	3.05157e+06	6.12014e+06	8.8143	0.000802007	0.00611531	commonly detected	enriched
Mediator of RNA polymerase II transcription subunit 23 OS=Mus musculus GN=Med23 PE=1 SV=2	Med23	Q80YQ2	1		1				7			203243	189419	549849	886197	1.50616e+06	2.06944e+06	1.43379e+06	3.21202e+06	4.49574	0.00771124	0.0258454	commonly detected	enriched
Death-inducer obliterator 1 OS=Mus musculus GN=Dido1 PE=1 SV=4	Dido1	Q8C9B9	1		1				21			558207	699584	189267	962063	2.55526e+07	1.981e+07	2.05409e+07	2.56264e+07	37.9931	4.31404e-05	0.000825426	commonly detected	enriched
E1A-binding protein p400 OS=Mus musculus GN=Ep400 PE=1 SV=3	Ep400	Q8CHI8	1		7				19			1.9636e+06	3.92581e+06	5.22033e+06	4.28934e+06	1.00747e+07	8.55662e+06	1.43047e+07	1.18494e+07	2.90832	0.0035732	0.0153497	commonly detected	enriched
DNA methyltransferase 1-associated protein 1 OS=Mus musculus GN=Dmap1 PE=1 SV=1	Dmap1	Q9JI44	1		2	1			6			860528	1.47066e+06	218571	252390	2.66131e+06	4.27324e+06	4.77069e+06	1.03701e+07	7.87801	0.00616466	0.0219667	commonly detected	enriched
Protein Prdm2 OS=Mus musculus GN=Prdm2 PE=2 SV=1	Prdm2	A2A7B5	1	1	1			4	8			916979	257620	648907	1.09613e+06	1.04653e+07	9.04383e+06	2.66076e+07	1.79199e+07	21.9331	0.000255871	0.00289039	commonly detected	enriched
Crooked neck-like protein 1 OS=Mus musculus GN=Crnkl1 PE=2 SV=1	Crnkl1	P63154	2			1		1				16400.2	25470.5	31654.5	10674.1	438771	315659	423832	275966	17.2712	3.48299e-05	0.000758795	commonly detected	enriched
Polyadenylate-binding protein 1 OS=Mus musculus GN=Pabpc1 PE=1 SV=2	Pabpc1	P29341	2		7				21			1.19969e+07	7.11975e+06	8.18746e+06	1.29294e+07	4.77177e+07	3.69305e+07	9.8979e+07	4.53773e+07	5.69189	0.000616994	0.00508603	commonly detected	enriched
Nucleolin OS=Mus musculus GN=Ncl PE=1 SV=2	Ncl	P09405	2		5	9			10	9		5.69883e+06	5.31338e+06	3.35114e+06	5.3271e+06	2.6901e+07	1.19472e+07	1.18642e+07	2.65366e+07	3.92317	0.00254196	0.012114	commonly detected	enriched
UAP56-interacting factor OS=Mus musculus GN=Fyttd1 PE=1 SV=1	Fyttd1	Q91Z49	2		5	1			12	1		2.25944e+06	2259762	2.93731e+06	1.9222e+06	1.38525e+07	1.09065e+07	1.51386e+07	1.24494e+07	5.58147	4.92598e-06	0.000300485	commonly detected	enriched
Polymerase delta-interacting protein 3 OS=Mus musculus GN=Poldip3 PE=1 SV=1	Poldip3	Q8BG81	2	15	58		8	36	76	1	27	1.84707e+09	2.16946e+09	2.41239e+09	1.42365e+09	5.57804e+09	5.71307e+09	7.04743e+09	3.98949e+09	2.8434	0.00071303	0.00572301	commonly detected	enriched
Splicing factor, proline- and glutamine-rich OS=Mus musculus GN=Sfpq PE=1 SV=1	Sfpq	Q8VIJ6	2	2	33	1	7	2	55	1	16	5.30468e+08	6.54031e+08	4.29494e+08	4.25787e+08	1.72046e+09	1.77985e+09	1.50162e+09	2.34009e+09	3.59941	8.7137e-05	0.00127599	commonly detected	enriched
MCG16685, isoform CRA_d OS=Mus musculus GN=Wtap PE=4 SV=1	Wtap	Q9ER69	2			1		12	6	1	3	37128	35696.1	35561.2	13089.7	9.11438e+07	3.15172e+07	3.20174e+07	3.28085e+07	1543.42	9.96077e-07	0.000106453	commonly detected	enriched
Lamina-associated polypeptide 2, isoforms alpha/zeta OS=Mus musculus GN=Tmpo PE=1 SV=4	Tmpo	Q61033	5		6				17			4.8174e+06	7.96282e+06	1.01766e+07	9.03662e+06	2.97653e+07	1.70803e+07	2.47536e+07	1.38323e+07	2.67028	0.00655079	0.0229654	commonly detected	enriched
Kinesin-like protein KIFC1 OS=Mus musculus GN=Kifc5b PE=3 SV=1	Kifc5b	E9PUA5	5	1	13		1	8	23	1	6	1.90295e+07	13310443	1.34113e+07	1.75469e+07	6.73144e+07	5.64331e+07	6.73758e+07	6.1516e+07	3.99125	9.1099e-06	0.000463087	commonly detected	enriched
Protein Numa1 OS=Mus musculus GN=Numa1 PE=2 SV=1	Numa1	E9Q7G0	5	7	6		5	66	63		25	2.80948e+07	1.87525e+07	3.04868e+07	3.5576e+07	4.26633e+08	1.66931e+08	4.33379e+08	3.09219e+08	11.8339	8.78553e-05	0.00127599	commonly detected	enriched
Gamma-tubulin complex component 3 OS=Mus musculus GN=Tubgcp3 PE=2 SV=2	Tubgcp3	P58854	5		4		1		16			2.75846e+06	2.44271e+06	2.80981e+06	3.40207e+06	2.94858e+07	1.01771e+07	1.78301e+07	1.17335e+07	6.06556	0.000451231	0.0040478	commonly detected	enriched
Gamma-tubulin complex component 2 OS=Mus musculus GN=Tubgcp2 PE=2 SV=2	Tubgcp2	Q921G8	5		5		1	1	11		1	8.26111e+06	5986697	3.5262e+06	4.57361e+06	2.04457e+07	1.35988e+07	1.44491e+07	2.16342e+07	3.13805	0.00167617	0.00929515	commonly detected	enriched
Heterochromatin protein 1-binding protein 3 OS=Mus musculus GN=Hp1bp3 PE=1 SV=1	Hp1bp3	Q3TEA8	2			5		2				417733	741821	401996	659674	3.10565e+06	8.26283e+06	6.66933e+06	1.37759e+06	8.74086	0.00382474	0.016202	commonly detected	enriched
Interferon-stimulated 20 kDa exonuclease-like 2 OS=Mus musculus GN=Isg20l2 PE=2 SV=2	Isg20l2	Q3U1G5	2		1			2	1			666834	138018	100049	261482	2.78943e+06	3.34515e+06	3.34996e+06	1.20179e+07	18.4352	0.00142785	0.00888767	commonly detected	enriched
MORC family CW-type zinc finger protein 2A OS=Mus musculus GN=Morc2a PE=1 SV=2	Morc2a	Q69ZX6	2		1				4			992630	567631	399776	181964	1.81817e+07	1.84445e+06	1.60731e+06	1.00091e+07	14.7724	0.0150298	0.0445059	commonly detected	enriched
Integrator complex subunit 1 OS=Mus musculus GN=Ints1 PE=1 SV=2	Ints1	Q6P4S8	2		3				12			2.37089e+06	1.37042e+06	932581	1.80657e+06	6.50212e+06	6.04904e+06	4.48153e+06	1.1346e+07	4.37913	0.00181743	0.00989849	commonly detected	enriched
RNA pseudouridylate synthase domain-containing protein 4 OS=Mus musculus GN=Rpusd4 PE=2 SV=1	Rpusd4	Q9CWX4	2		1				3			1.51938e+06	595997	300657	678285	3.53596e+06	2.29084e+06	3.03251e+06	4.22479e+06	4.22843	0.00438299	0.0176059	commonly detected	enriched
Leukocyte receptor cluster member 1 homolog OS=Mus musculus GN=Leng1 PE=2 SV=1	Leng1	Q9DB98	2			1			4			167154	313497	268826	392766	2.26037e+06	1.31065e+06	2.06948e+06	528582	5.40085	0.0056373	0.0207154	commonly detected	enriched
Importin subunit beta-1 OS=Mus musculus GN=Kpnb1 PE=1 SV=2	Kpnb1	P70168	2		1						1	12486.1	61329.8	58289.8	66096.6	462998	686973	184983	269826	8.09668	0.00485611	0.0185139	commonly detected	enriched
Alpha-actinin-1 OS=Mus musculus GN=Actn1 PE=1 SV=1	Actn1	Q7TPR4	3			10			14	5		5.22823e+06	4.38497e+06	5.00958e+06	5.59293e+06	1.31649e+07	2.46131e+07	2.42243e+07	1.80592e+07	3.96036	0.000132951	0.0016764	commonly detected	enriched
Capping protein (Actin filament) muscle Z-line, alpha 1 OS=Mus musculus GN=Capza1 PE=2 SV=1	Capza1	P47753	3		7	15			5	25		5.28654e+07	4.42636e+07	9.63938e+07	7.64171e+07	1.24501e+08	1.32864e+08	1.79175e+08	1.86925e+08	2.30964	0.00535236	0.0199082	commonly detected	enriched
Dedicator of cytokinesis protein 8 OS=Mus musculus GN=Dock8 PE=1 SV=4	Dock8	Q8C147	3		6	11			10	21		2.37525e+07	1.16834e+07	1.16843e+07	9.27128e+06	5.49336e+07	3.39048e+07	3.76605e+07	3.1474e+07	2.80136	0.00409827	0.0168915	commonly detected	enriched
WAS/WASL-interacting protein family member 1 OS=Mus musculus GN=Wipf1 PE=1 SV=1	Wipf1	Q8K1I7	3		5				9			4.56128e+07	3.16567e+07	5.35834e+07	4.07755e+07	1.00861e+08	6.40612e+07	8.69248e+07	1.21909e+08	2.1777	0.00461015	0.0180269	commonly detected	enriched
Phosphatidylinositol 3,4,5-trisphosphate 5-phosphatase 1 OS=Mus musculus GN=Inpp5d PE=1 SV=2	Inpp5d	Q9ES52	3		2				12			2.34584e+06	1.03603e+06	969672	1.14111e+06	9.99971e+06	9.4423e+06	1.75017e+07	6.49511e+06	7.90853	0.000372138	0.00378341	commonly detected	enriched
Serine/threonine-protein phosphatase PP1-alpha catalytic subunit OS=Mus musculus GN=Ppp1ca PE=1 SV=1	Ppp1ca	P62137	4			5			4	10		1.82665e+06	2.32961e+06	2.28804e+06	3.22309e+06	6.72422e+06	4.61561e+06	9.95639e+06	1.13923e+07	3.38132	0.00240915	0.0118515	commonly detected	enriched
Annexin A2 OS=Mus musculus GN=Anxa2 PE=1 SV=2	Anxa2	P07356	4	1	3			1	1	11		2.90297e+06	2.75512e+06	3.26962e+06	6.76513e+06	1.72941e+07	1.42154e+07	1.50693e+07	2.63834e+07	4.64939	0.000758221	0.00592968	commonly detected	enriched
Hornerin OS=Mus musculus GN=Hrnr PE=1 SV=1	Hrnr	Q8VHD8	4		3	1			6			647300	517563	245215	1.58433e+06	2.95092e+06	2.83433e+06	2.67671e+06	2.81395e+06	3.76566	0.00697808	0.0241085	commonly detected	enriched
60S ribosomal protein L7a OS=Mus musculus GN=Rpl7a PE=2 SV=2	Rpl7a	P12970	4		1	7	1	3	1	16		5.61547e+06	5.43196e+06	5.14053e+06	9.00869e+06	4.33666e+07	2.87284e+07	2.87648e+07	3.69737e+07	5.47031	4.60074e-05	0.000825426	commonly detected	enriched
60S ribosomal protein L27a OS=Mus musculus GN=Rpl27a PE=2 SV=5	Rpl27a	P14115	4		1	2			2			615657	452912	451562	574573	6.22012e+06	2.23689e+06	2.05673e+06	6.40687e+06	8.07781	0.000900373	0.00627729	commonly detected	enriched
60S ribosomal protein L7 OS=Mus musculus GN=Rpl7 PE=2 SV=2	Rpl7	P14148	4		4	9			4	21		1.27733e+07	6.13674e+06	8.41639e+06	1.16391e+07	2.60224e+07	1.94084e+07	3.67068e+07	2.56518e+07	2.76628	0.00278821	0.0128849	commonly detected	enriched
40S ribosomal protein S2 OS=Mus musculus GN=Rps2 PE=1 SV=3	Rps2	P25444	4			5			4	6		6.09935e+06	4.9811e+06	4.37756e+06	3.84901e+06	8.38397e+06	1.19852e+07	1.28999e+07	1.83469e+07	2.67343	0.00222363	0.0115106	commonly detected	enriched
60S ribosomal protein L6 OS=Mus musculus GN=Rpl6 PE=1 SV=3	Rpl6	P47911	4			5		1	3	8		4.41763e+06	1.56868e+06	2.65406e+06	3.36961e+06	7.17939e+06	4.9036e+06	6.97412e+06	5.78905e+06	2.06879	0.016388	0.048061	commonly detected	enriched
40S ribosomal protein S18 OS=Mus musculus GN=Rps18 PE=1 SV=3	Rps18	P62270	4		2				3			1.18942e+06	1.63452e+06	2.20126e+06	1.87513e+06	3.76327e+06	3.71468e+06	8.57075e+06	4.67409e+06	3.00316	0.00408249	0.0168915	commonly detected	enriched
40S ribosomal protein S9 OS=Mus musculus GN=Rps9 PE=2 SV=3	Rps9	Q6ZWN5	4		1	1		1	2		1	660740	169840	727962	335821	2.28595e+06	2.27138e+06	4.92959e+06	2.60892e+06	6.38518	0.00231327	0.0115663	commonly detected	enriched
Protein RCC2 OS=Mus musculus GN=Rcc2 PE=2 SV=1	Rcc2	Q8BK67	4			1			2	1		166864	101181	118669	163117	1.00845e+06	750705	1.07405e+06	897348	6.78489	1.15109e-05	0.000501547	commonly detected	enriched
60S ribosomal protein L24 OS=Mus musculus GN=Rpl24 PE=2 SV=2	Rpl24	Q8BP67	4	1	5			3	7		1	4.47836e+06	5.99934e+06	3.13949e+06	3.54665e+06	1.92326e+07	1.22583e+07	9.54663e+06	1.74499e+07	3.40759	0.00131123	0.00833176	commonly detected	enriched
RNA-binding protein 33 OS=Mus musculus GN=Rbm33 PE=1 SV=2	Rbm33	Q9CXK9	1		2				8			1.31866e+06	1103009	608931	1.03078e+06	9.59611e+06	8.09867e+06	8.0462e+06	1.10962e+07	9.07015	1.839e-05	0.0005507	commonly detected	enriched
Histone H1.4 OS=Mus musculus GN=Hist1h1e PE=1 SV=2	Hist1h1e	P43274	1		2	7		6				6.35114e+06	6.95929e+06	7.9425e+06	3.76382e+07	2.10411e+08	2.17274e+08	1.10276e+08	3.18724e+08	14.547	0.000839192	0.00624277	commonly detected	enriched
Histone H1.5 OS=Mus musculus GN=Hist1h1b PE=1 SV=2	Hist1h1b	P43276	1	1		3		8		2		1.02867e+06	2.40408e+06	3.39748e+06	2.21711e+06	2.48353e+07	1.55559e+07	1.08851e+07	2.24299e+07	8.14671	0.000500939	0.00436533	commonly detected	enriched
Histone H1.3 OS=Mus musculus GN=Hist1h1d PE=1 SV=2	Hist1h1d	P43277	1	6		10		9		6		2.89353e+07	1.21024e+07	6.75959e+06	1.07709e+07	3.214e+08	2.62749e+08	1.84106e+08	1.73708e+08	16.0832	0.00013741	0.0016764	commonly detected	enriched
Histone H2B type 2-B OS=Mus musculus GN=Hist2h2bb PE=1 SV=3	Hist2h2bb	Q64525	1	1	2	4			2	8	1	4.01834e+06	5.08711e+06	6.5736e+06	1.3355e+07	3.11408e+07	1.8708e+07	3.5232e+07	3.1874e+07	4.0282	0.00250347	0.012114	commonly detected	enriched
Structural maintenance of chromosomes flexible hinge domain-containing protein 1 OS=Mus musculus GN=Smchd1 PE=1 SV=2	Smchd1	Q6P5D8	1		3				11			2.16022e+06	1194277	1.93712e+06	1.62293e+06	5.75668e+06	6.6888e+06	8.94719e+06	8.76936e+06	4.36211	0.000119213	0.00158087	commonly detected	enriched
Histone H2A type 1 OS=Mus musculus GN=Hist1h2ab PE=1 SV=3	Hist1h2ab	Q8CGP5	1		1	1		1	1	2	1	465578	953397	317265	561030	4.22127e+06	3.44579e+06	2.8263e+06	2.8424e+06	5.80505	0.00032122	0.00337834	commonly detected	enriched
SWI/SNF-related matrix-associated actin-dependent regulator of chromatin subfamily A member 5 OS=Mus musculus GN=Smarca5 PE=1 SV=1	Smarca5	Q91ZW3	1		1	1			4	2		621956	1.05277e+06	316952	354949	2.53944e+06	2.02301e+06	1.35426e+06	2.45535e+06	3.5677	0.00477396	0.0184311	commonly detected	enriched
Fructose-bisphosphate aldolase A OS=Mus musculus GN=Aldoa PE=1 SV=2	Aldoa	P05064	6		1					7		103290	118127	231191	205917	3.80866e+06	7.11479e+06	3.11578e+06	2.19186e+06	24.6476	5.88521e-05	0.000983133	commonly detected	enriched
L-lactate dehydrogenase A chain OS=Mus musculus GN=Ldha PE=1 SV=3	Ldha	P06151	6		1				1	4		306269	416630	117230	340443	6.16764e+06	6.17178e+06	6.35604e+06	6.6924e+06	21.5047	3.007e-05	0.000705489	commonly detected	enriched
DnaJ homolog subfamily B member 1 OS=Mus musculus GN=Dnajb1 PE=2 SV=3	Dnajb1	Q9QYJ3	6		2				13			1.2168e+06	2.44678e+06	3.97531e+06	3.5677e+06	3.17742e+07	1.8784e+07	2.88143e+07	1.65378e+07	8.55839	0.000399378	0.00380657	commonly detected	enriched
Protein 2310022A10Rik OS=Mus musculus GN=2310022A10Rik PE=4 SV=1	2310022A10Rik	Q8R3Y5		8	33		2	14	47		5	2.61686e+08	2.4769e+08	4.34315e+08	3.39204e+08	1.25656e+09	8.38318e+08	2.15239e+09	7.42796e+08	3.88969	0.00318117	0.0142685	commonly detected	enriched
Heterogeneous nuclear ribonucleoprotein K OS=Mus musculus GN=Hnrnpk PE=2 SV=1	Hnrnpk	P61979	2					2	2							1.90822e+06	999583	941751	758374				unique in satb	enriched
Cell division cycle 5-like protein OS=Mus musculus GN=Cdc5l PE=1 SV=2	Cdc5l	Q6A068	2					1								738485	1.14793e+06	420348	459332				unique in satb	enriched
Isoform 2 of Paraspeckle component 1 OS=Mus musculus GN=Pspc1	Pspc1	Q8R326	2								7					1.06094e+08	1.64583e+08	1.0569e+08	1.01576e+08				unique in satb	enriched
Polyadenylate-binding protein 2 OS=Mus musculus GN=Pabpn1 PE=2 SV=1	Pabpn1	Q8CCS6	2					2	1							1.23702e+06	1.00601e+06	1.45406e+06	683747				unique in satb	enriched
Zinc finger protein 48 OS=Mus musculus GN=Znf48 PE=1 SV=2	Znf48	Q3US17	2								1					1.17049e+06	1.38444e+06	772953	587924				unique in satb	enriched
Zinc finger protein 48 OS=Mus musculus GN=Znf48 PE=2 SV=2	Znf48	Q3US17	2						1							430249	337216	170791	307000				unique in satb	enriched
CGG triplet repeat-binding protein 1 OS=Mus musculus GN=Cggbp1 PE=2 SV=1	Cggbp1	Q8BHG9	2						2							1.57008e+06	995261	2.13222e+06	2.08604e+06				unique in satb	enriched
DNA-directed RNA polymerase II subunit RPB2 OS=Mus musculus GN=Polr2b PE=2 SV=2	Polr2b	Q8CFI7	2						1							371701	178901	268096	100469				unique in satb	enriched
Thyroid transcription factor 1-associated protein 26 OS=Mus musculus GN=Ccdc59 PE=2 SV=2	Ccdc59	Q8R2N0	2						2							1.25997e+06	1.31664e+06	1.12364e+06	656882				unique in satb	enriched
Isoform 2 of Transcription factor Sp2 OS=Mus musculus GN=Sp2	Sp2	Q9D2H6	2								1					640295	680901	1.53372e+06	1.62508e+06				unique in satb	enriched
Protein SPT2 homolog OS=Mus musculus GN=Spty2d1 PE=2 SV=1	Spty2d1	Q68FG3	2					4	7							1.88187e+07	1.70284e+07	9.31192e+06	2.16179e+07				unique in satb	enriched
Junction plakoglobin OS=Mus musculus GN=Jup PE=1 SV=3	Jup	Q02257	2					3								4.10706e+06	5.08982e+06	5.22134e+06	5.21555e+06				unique in satb	enriched
Nuclear receptor coactivator 5 OS=Mus musculus GN=Ncoa5 PE=1 SV=1	Ncoa5	Q91W39	2							1						217242	446757	221927	57208.6				unique in satb	enriched
Ataxin-2-like protein OS=Mus musculus GN=Atxn2l PE=1 SV=1	Atxn2l	Q7TQH0	2						12							1.59589e+07	1.38943e+07	1.50853e+07	2.22879e+07				unique in satb	enriched
Protein Wiz OS=Mus musculus GN=Wiz PE=1 SV=2	Wiz	O88286	2						3							8.86055e+06	9.97956e+06	3.80151e+06	2.65238e+07				unique in satb	enriched
Src kinase-associated phosphoprotein 1 OS=Mus musculus GN=Skap1 PE=1 SV=1	Skap1	Q3UUV5	3						1							206619	907010	1.62264e+06	939564				unique in satb	enriched
Retinoblastoma-like protein 2 OS=Mus musculus GN=Rbl2 PE=1 SV=3	Rbl2	Q64700	4						2							730806	481119	473106	1.41991e+06				unique in satb	enriched
Negative elongation factor A OS=Mus musculus GN=Nelfa PE=1 SV=1	Nelfa	Q8BG30	1						1							94657.6	187281	614295	188364				unique in satb	enriched
Transcription elongation factor B polypeptide 3 OS=Mus musculus GN=Tceb3 PE=1 SV=3	Tceb3	Q8CB77	1						1							1.80263e+06	1.23083e+06	1.24296e+06	208416				unique in satb	enriched
Transcription initiation factor TFIID subunit 5 OS=Mus musculus GN=Taf5 PE=2 SV=1	Taf5	Q8C092	1						3							1.2021e+06	1.19616e+06	1.23724e+06	2.25631e+06				unique in satb	enriched
Cyclin-T1 OS=Mus musculus GN=Ccnt1 PE=1 SV=3	Ccnt1	Q9QWV9	1						5							2.44159e+06	2.23857e+06	3.1846e+06	3.01214e+06				unique in satb	enriched
Mediator of RNA polymerase II transcription subunit 12 OS=Mus musculus GN=Med12 PE=1 SV=1	Med12	A2AGH6	1						5							1.31635e+06	969700	2.19967e+06	1.01229e+06				unique in satb	enriched
Menin OS=Mus musculus GN=Men1 PE=2 SV=1	Men1	O88559	1					3	2		1					2.37242e+06	804245	992941	1.78988e+06				unique in satb	enriched
CREB-binding protein OS=Mus musculus GN=Crebbp PE=1 SV=3	Crebbp	P45481	1						4							2.85627e+06	1.80561e+06	5.40849e+06	3.1347e+06				unique in satb	enriched
KAT8 regulatory NSL complex subunit 1 OS=Mus musculus GN=Kansl1 PE=1 SV=1	Kansl1	Q80TG1	1						2							881484	508174	553196	415412				unique in satb	enriched
Transcription initiation factor TFIID subunit 1 OS=Mus musculus GN=Taf1 PE=2 SV=2	Taf1	Q80UV9	1						1							121244	358880	117677	179486				unique in satb	enriched
Microspherule protein 1 OS=Mus musculus GN=Mcrs1 PE=2 SV=1	Mcrs1	Q99L90	1						2							572636	414830	396419	1.04807e+06				unique in satb	enriched
Host cell factor 2 OS=Mus musculus GN=Hcfc2 PE=4 SV=1	Hcfc2	Q9D968	1						2							761667	756548	296136	351990				unique in satb	enriched
Histone acetyltransferase p300 OS=Mus musculus GN=Ep300 PE=1 SV=1	Ep300	B2RWS6	1						8							3.63956e+06	2.52643e+06	1.49745e+06	3.34053e+06				unique in satb	enriched
Protein Setd1a OS=Mus musculus GN=Setd1a PE=4 SV=1	Setd1a	E9PYH6	1						6							5.06746e+06	2.99023e+06	4.80234e+06	2.76993e+06				unique in satb	enriched
Isoform 2 of C-terminal-binding protein 1 OS=Mus musculus GN=Ctbp1	Ctbp1	O88712	1					1								981549	6.08302e+06	4.55661e+06	846308				unique in satb	enriched
Isoform 2 of Histone-lysine N-methyltransferase 2A OS=Mus musculus GN=Kmt2a	Kmt2a	P55200	1								2					4.38598e+06	1.2043e+06	1.87351e+06	1.44417e+06				unique in satb	enriched
Paired amphipathic helix protein Sin3a OS=Mus musculus GN=Sin3a PE=1 SV=3	Sin3a	Q60520	1						8							5.91303e+06	6.0421e+06	4.02769e+06	4.15548e+06				unique in satb	enriched
Transcriptional regulator ATRX OS=Mus musculus GN=Atrx PE=1 SV=3	Atrx	Q61687	1						1							211378	110976	290990	39723.6				unique in satb	enriched
Transcription initiation factor TFIID subunit 6 OS=Mus musculus GN=Taf6 PE=2 SV=1	Taf6	Q62311	1						2							370817	1.04489e+06	2.18461e+06	1.00999e+06				unique in satb	enriched
Vacuolar protein sorting-associated protein 72 homolog OS=Mus musculus GN=Vps72 PE=2 SV=2	Vps72	Q62481	1						1							552406	709213	346738	929510				unique in satb	enriched
PAX-interacting protein 1 OS=Mus musculus GN=Paxip1 PE=1 SV=1	Paxip1	Q6NZQ4	1						2							234393	249044	283662	228736				unique in satb	enriched
Chromodomain-helicase-DNA-binding protein 4 OS=Mus musculus GN=Chd4 PE=1 SV=1	Chd4	Q6PDQ2	1						6							2.39853e+06	2.88992e+06	3.57599e+06	2.68048e+06				unique in satb	enriched
SWI/SNF-related matrix-associated actin-dependent regulator of chromatin subfamily A-like protein 1 OS=Mus musculus GN=Smarcal1 PE=2 SV=1	Smarcal1	Q8BJL0	1						2							171127	193607	168620	308686				unique in satb	enriched
Protein EMSY OS=Mus musculus GN=Emsy PE=1 SV=2	Emsy	Q8BMB0	1						3							1.78836e+06	854805	2.0201e+06	587476				unique in satb	enriched
KAT8 regulatory NSL complex subunit 2 OS=Mus musculus GN=Kansl2 PE=4 SV=1	Kansl2	Q8BQR4	1						2							248412	597070	438111	650697				unique in satb	enriched
Retinoblastoma-binding protein 5 OS=Mus musculus GN=Rbbp5 PE=1 SV=2	Rbbp5	Q8BX09	1						4							1.71277e+06	1.14253e+06	1.13687e+06	1.50276e+06				unique in satb	enriched
Enhancer of polycomb homolog 2 OS=Mus musculus GN=Epc2 PE=2 SV=2	Epc2	Q8C0I4	1						1							652415	127938	210820	26595.9				unique in satb	enriched
DNA-binding protein SATB2 OS=Mus musculus GN=Satb2 PE=1 SV=1	Satb2	Q8VI24	1						12							7.1357e+08	4.55553e+08	8.62768e+08	3.11177e+08				unique in satb	enriched
Transcription initiation factor TFIID subunit 9 OS=Mus musculus GN=Taf9 PE=2 SV=1	Taf9	Q8VI33	1						2							509780	1.29244e+06	2.37105e+06	1.95539e+06				unique in satb	enriched
Mediator of RNA polymerase II transcription subunit 4 OS=Mus musculus GN=Med4 PE=2 SV=1	Med4	Q9CQA5	1						2							75811.8	144131	181159	234292				unique in satb	enriched
CpG-binding protein OS=Mus musculus GN=Cxxc1 PE=2 SV=1	Cxxc1	Q9CWW7	1						2							1.00983e+06	634227	1.06526e+06	1.38435e+06				unique in satb	enriched
Bromodomain-containing protein 4 OS=Mus musculus GN=Brd4 PE=1 SV=2	Brd4	Q9ESU6	1						2							613508	641735	1.66232e+06	238953				unique in satb	enriched
Krueppel-like factor 13 OS=Mus musculus GN=Klf13 PE=2 SV=2	Klf13	Q9JJZ6	1						2							386953	659299	3.22752e+06	317618				unique in satb	enriched
Set1/Ash2 histone methyltransferase complex subunit ASH2 OS=Mus musculus GN=Ash2l PE=1 SV=1	Ash2l	Q91X20	1					1	2							1.38705e+06	2.86023e+06	1.09932e+06	1.72346e+06				unique in satb	enriched
WD repeat-containing protein 5 OS=Mus musculus GN=Wdr5 PE=1 SV=1	Wdr5	P61965	1					1	3							3.20553e+06	2.30587e+06	2.87207e+06	3.33876e+06				unique in satb	enriched
Lysine-specific demethylase 5A OS=Mus musculus GN=Kdm5a PE=1 SV=2	Kdm5a	Q3UXZ9	1					2	2							1.00321e+06	708227	1.07819e+06	1.08823e+06				unique in satb	enriched
Metastasis-associated protein MTA1 OS=Mus musculus GN=Mta1 PE=1 SV=1	Mta1	Q8K4B0	1					4	1							1.26563e+07	9.35637e+06	1.63287e+07	1.55397e+07				unique in satb	enriched
Metastasis-associated protein MTA2 OS=Mus musculus GN=Mta2 PE=1 SV=1	Mta2	Q9R190	1					2	2							4.73973e+06	972085	6.79073e+06	758291				unique in satb	enriched
Activity-dependent neuroprotector homeobox protein OS=Mus musculus GN=Adnp PE=2 SV=1	Adnp	Q9Z103	1					1	3							1.01546e+06	765974	1.29152e+06	724450				unique in satb	enriched
Peroxiredoxin-4 OS=Mus musculus GN=Prdx4 PE=1 SV=1	Prdx4	O08807	6							2						3.73012e+06	2.45499e+06	1.19586e+06	859759				unique in satb	enriched
Protein DJ-1 OS=Mus musculus GN=Park7 PE=1 SV=1	Park7	Q99LX0	6							1						78662.9	690538	261900	917562				unique in satb	enriched
Peroxiredoxin-1 OS=Mus musculus GN=Prdx1 PE=1 SV=1	Prdx1	P35700	6					1	1	3						410362	408651	805115	593033				unique in satb	enriched
WW domain-binding protein 11 OS=Mus musculus GN=Wbp11 PE=1 SV=2	Wbp11	Q923D5	2						4							3.51957e+06	3.56129e+06	1.57628e+07	5.37901e+06				unique in satb	enriched
RNA-binding protein 26 OS=Mus musculus GN=Rbm26 PE=1 SV=2	Rbm26	Q6NZN0	2						5							4.64747e+06	4.6986e+06	7.19417e+06	5.62495e+06				unique in satb	enriched
Protein virilizer homolog OS=Mus musculus GN=Kiaa1429 PE=1 SV=1	Kiaa1429	A2AIV2	2						8							1.02731e+07	6.91128e+06	1.03667e+07	1.16619e+07				unique in satb	enriched
RNA demethylase ALKBH5 OS=Mus musculus GN=Alkbh5 PE=1 SV=2	Alkbh5	Q3TSG4	2						2							393783	996830	2.31522e+06	630300				unique in satb	enriched
Integrator complex subunit 8 OS=Mus musculus GN=Ints8 PE=2 SV=1	Ints8	Q80V86	1						1							1.2077e+06	266176	509831	316021				unique in satb	enriched
Zinc finger CCCH domain-containing protein 11A OS=Mus musculus GN=Zc3h11a PE=1 SV=1	Zc3h11a	Q6NZF1							12							1.16715e+07	9.87316e+06	1.1963e+07	1.16089e+07				unique in satb	enriched
Serine/arginine-rich splicing factor 5 OS=Mus musculus GN=Srsf5 PE=1 SV=2	Srsf5	O35326	2						1	2						1.05221e+06	1.24924e+06	723580	672842				unique in satb	enriched
Intron-binding protein aquarius OS=Mus musculus GN=Aqr PE=2 SV=2	Aqr	Q8CFQ3	2					1	2							1.04714e+06	356061	382699	820347				unique in satb	enriched
Protein Zc3h13 OS=Mus musculus GN=Zc3h13 PE=2 SV=1	Zc3h13	E9Q784	2					7	15							2.82192e+07	1.23544e+07	2.96671e+07	1.44208e+07				unique in satb	enriched
Zinc finger CCCH domain-containing protein 18 OS=Mus musculus GN=Zc3h18 PE=1 SV=1	Zc3h18	Q0P678	2					2	3							3.55062e+06	4.10519e+06	4.13403e+06	1.05037e+07				unique in satb	enriched
Isoform 4 of Apoptotic chromatin condensation inducer in the nucleus OS=Mus musculus GN=Acin1	Acin1	Q9JIX8	2					3			1					3.45614e+06	6.62505e+06	3.34281e+06	2.95494e+06				unique in satb	enriched
Transformer-2 protein homolog alpha OS=Mus musculus GN=Tra2a PE=1 SV=1	Tra2a	Q6PFR5	2					1	1	1						2.87767e+06	1.17741e+07	1.98047e+06	3.62231e+06				unique in satb	enriched
Protein Rbm15 OS=Mus musculus GN=Rbm15 PE=2 SV=1	Rbm15	Q0VBL3	2					14	22		4					4.27834e+07	2.04961e+07	2.99494e+07	4.02415e+07				unique in satb	enriched
Protein Znf512b OS=Mus musculus GN=Znf512b PE=2 SV=1	Znf512b	B7ZCR6	5					5	3							1.17007e+07	8.40734e+06	8.20043e+06	8.91636e+06				unique in satb	enriched
SUN domain-containing protein 2 OS=Mus musculus GN=Sun2 PE=1 SV=3	Sun2	Q8BJS4	5						2							1.54636e+06	752098	444276	1.16939e+06				unique in satb	enriched
Aldehyde dehydrogenase, dimeric NADP-preferring (Fragment) OS=Mus musculus GN=Aldh3a1 PE=4 SV=1	Aldh3a1	P47739	5								1					1.82376e+06	811371	2.64507e+06	2.50955e+06				unique in satb	enriched
Protein Mki67 OS=Mus musculus GN=Mki67 PE=2 SV=1	Mki67	E9PVX6	5					9								1.57328e+07	2.25918e+07	2.70314e+07	2.65241e+07				unique in satb	enriched
Vimentin OS=Mus musculus GN=Vim PE=1 SV=3	Vim	P20152	5							4						256225	2.87118e+06	781287	985173				unique in satb	enriched
Annexin A5 OS=Mus musculus GN=Anxa5 PE=1 SV=1	Anxa5	P48036	5							3						1.45222e+06	1.81509e+06	2.27465e+06	2.94902e+06				unique in satb	enriched
Prelamin-A/C OS=Mus musculus GN=Lmna PE=1 SV=2	Lmna	P48678	5							3						52465.3	217014	129257	155180				unique in satb	enriched
Protein Tubgcp6 OS=Mus musculus GN=Tubgcp6 PE=2 SV=1	Tubgcp6	G5E8P0	5						2							1.21376e+06	1.3835e+06	2.43524e+06	2.16765e+06				unique in satb	enriched
Targeting protein for Xklp2 OS=Mus musculus GN=Tpx2 PE=1 SV=1	Tpx2	A2APB8	5						2							550744	406774	279241	582802				unique in satb	enriched
Importin subunit alpha-1 OS=Mus musculus GN=Kpna2 PE=1 SV=2	Kpna2	P52293	5						1		2					1.14633e+06	3.0866e+06	3.32427e+06	3.81699e+06				unique in satb	enriched
Protein MCM10 homolog OS=Mus musculus GN=Mcm10 PE=2 SV=1	Mcm10	Q0VBD2	5							1						64499.5	83953.2	217608	994725				unique in satb	enriched
Isoform 3 of Kinesin-like protein KIF20B OS=Mus musculus GN=Kif20b	Kif20b	Q80WE4	5					16			2					3.94487e+07	5.17844e+07	7.19493e+07	4.35272e+07				unique in satb	enriched
G2 and S phase-expressed protein 1 OS=Mus musculus GN=Gtse1 PE=1 SV=2	Gtse1	Q8R080	5						6							7.11828e+06	2.72044e+06	2.42953e+06	5.20752e+06				unique in satb	enriched
Transmembrane emp24 domain-containing protein 9 OS=Mus musculus GN=Tmed9 PE=2 SV=2	Tmed9	Q99KF1	5							1						103865	85811.7	97953.8	112001				unique in satb	enriched
Nucleolar and spindle-associated protein 1 OS=Mus musculus GN=Nusap1 PE=1 SV=1	Nusap1	Q9ERH4	5					6								1.10508e+07	1.6479e+07	1.11862e+07	1.0866e+07				unique in satb	enriched
Kinesin-like protein KIFC1 OS=Mus musculus GN=Kifc1 PE=1 SV=2	Kifc1	Q9QWT9	5						25							5.82506e+07	3.4184e+07	4.80226e+07	2.43876e+07				unique in satb	enriched
Treacle protein OS=Mus musculus GN=Tcof1 PE=1 SV=1	Tcof1	O08784	5							2						1.33964e+06	704652	833871	144005				unique in satb	enriched
Centrosomal protein of 170 kDa OS=Mus musculus GN=Cep170 PE=2 SV=1	Cep170	Q6A065	2					1	4							1.45371e+06	1.99926e+06	1.39541e+06	2.05725e+06				unique in satb	enriched
Uncharacterized protein KIAA0556 OS=Mus musculus GN=Kiaa0556 PE=2 SV=2	Kiaa0556	Q8C753	2						1							449115	874907	813015	454400				unique in satb	enriched
14-3-3 protein sigma OS=Mus musculus GN=Sfn PE=1 SV=2	Sfn	O70456	2					2								1.31396e+06	1.50628e+06	4.94794e+06	2.35681e+06				unique in satb	enriched
Isoform 2 of Arf-GAP with GTPase, ANK repeat and PH domain-containing protein 2 OS=Mus musculus GN=Agap2	Agap2	Q3UHD9	2								1					653813	188181	703971	1.56675e+06				unique in satb	enriched
Eukaryotic translation initiation factor 4 gamma 2 OS=Mus musculus GN=Eif4g2 PE=1 SV=2	Eif4g2	Q62448	2						6							1.37785e+06	1.86911e+06	2.97213e+06	4.78401e+06				unique in satb	enriched
Isoform 2 of PWWP domain-containing protein 2A OS=Mus musculus GN=Pwwp2a	Pwwp2a	Q69Z61	2					2								927742	593549	590584	1.36179e+06				unique in satb	enriched
Serine/threonine-protein phosphatase PGAM5, mitochondrial OS=Mus musculus GN=Pgam5 PE=2 SV=1	Pgam5	Q8BX10	2							2						213381	23870.7	152270	141705				unique in satb	enriched
MOSC domain-containing protein 2, mitochondrial OS=Mus musculus GN=Marc2 PE=1 SV=1	Marc2	Q922Q1	2						1							199622	109308	82975.8	41035.6				unique in satb	enriched
Spastin OS=Mus musculus GN=Spast PE=2 SV=3	Spast	Q9QYY8	2						1							30143.5	74302.8	44628.5	80683.1				unique in satb	enriched
Plakophilin-1 OS=Mus musculus GN=Pkp1 PE=1 SV=1	Pkp1	P97350	2					2								2.2822e+06	5.69416e+06	2.47017e+06	1.07461e+06				unique in satb	enriched
Ras GTPase-activating protein-binding protein 1 OS=Mus musculus GN=G3bp1 PE=1 SV=1	G3bp1	P97855	2						2							1.68857e+06	902503	481846	1.06454e+06				unique in satb	enriched
MCG21756, isoform CRA_b OS=Mus musculus GN=Nup205 PE=2 SV=1	Nup205	B9EJ54	2					1								759626	299358	2.0112e+06	623312				unique in satb	enriched
Protein Nup153 OS=Mus musculus GN=Nup153 PE=2 SV=1	Nup153	E9Q3G8	2					1	3							2.14694e+06	1.23446e+06	931578	3.84888e+06				unique in satb	enriched
Protein PRRC2A OS=Mus musculus GN=Prrc2a PE=1 SV=1	Prrc2a	Q7TSC1	2						5	2	1					4.0506e+06	5.6459e+06	3.81336e+06	6.11065e+06				unique in satb	enriched
MCG125477, isoform CRA_a OS=Mus musculus GN=Rasal3 PE=4 SV=1	Rasal3	Q8C2K5	2						1							126602	188566	140621	50181.2				unique in satb	enriched
Isoform 2 of E3 ubiquitin-protein ligase Hakai OS=Mus musculus GN=Cbll1	Cbll1	Q9JIY2	2					1								5.8768e+06	6.87122e+06	6.00571e+06	3.95196e+06				unique in satb	enriched
Proto-oncogene tyrosine-protein kinase LCK OS=Mus musculus GN=Lck PE=1 SV=4	Lck	P06240	3						1							375353	202344	143780	145180				unique in satb	enriched
Ena/VASP-like protein OS=Mus musculus GN=Evl PE=1 SV=2	Evl	P70429	3						3							1.34131e+07	2.24022e+06	1.8464e+06	1.06833e+06				unique in satb	enriched
Actin-related protein 2/3 complex subunit 3 OS=Mus musculus GN=Arpc3 PE=1 SV=3	Arpc3	Q9JM76	3							2						23010	92950.6	88591.1	85573.4				unique in satb	enriched
Vasodilator-stimulated phosphoprotein OS=Mus musculus GN=Vasp PE=1 SV=4	Vasp	P70460	3						6							2.24728e+06	5.66207e+06	7.02306e+06	6.23586e+06				unique in satb	enriched
Ras-related C3 botulinum toxin substrate 2 OS=Mus musculus GN=Rac2 PE=2 SV=1	Rac2	Q05144	3						2							96837.8	105207	76851.3	36868.9				unique in satb	enriched
Cytospin-A OS=Mus musculus GN=Specc1l PE=1 SV=1	Specc1l	Q2KN98	3							3						2.5186e+06	5.45724e+06	3.10736e+06	5.62971e+06				unique in satb	enriched
Protein THEMIS OS=Mus musculus GN=Themis PE=1 SV=1	Themis	Q8BGW0	3						2							30630.8	84058	383048	38837.3				unique in satb	enriched
Neural Wiskott-Aldrich syndrome protein OS=Mus musculus GN=Wasl PE=1 SV=1	Wasl	Q91YD9	3						2							2.46712e+06	443706	507282	498887				unique in satb	enriched
Twinfilin-1 OS=Mus musculus GN=Twf1 PE=1 SV=2	Twf1	Q91YR1	3							3						562820	908466	425290	1.02878e+06				unique in satb	enriched
Taperin OS=Mus musculus GN=Tprn PE=1 SV=1	Tprn	A2AI08	4							1						32666	46268.2	118948	22567.2				unique in satb	enriched
E3 ubiquitin-protein ligase TRIM33 OS=Mus musculus GN=Trim33 PE=1 SV=2	Trim33	Q99PP7	4						2							260171	444072	690128	997358				unique in satb	enriched
Phosphatidylethanolamine-binding protein 1 OS=Mus musculus GN=Pebp1 PE=1 SV=3	Pebp1	P70296	4							2						2.29195e+06	372455	1.28584e+06	2.96147e+06				unique in satb	enriched
Casein kinase I isoform alpha OS=Mus musculus GN=Csnk1a1 PE=2 SV=2	Csnk1a1	Q8BK63	4						2							639504	634974	310077	1.66025e+06				unique in satb	enriched
Proteasome subunit beta type-1 OS=Mus musculus GN=Psmb1 PE=1 SV=1	Psmb1	O09061	4							2						143287	156906	192337	505279				unique in satb	enriched
60S ribosomal protein L27 OS=Mus musculus GN=Rpl27 PE=2 SV=2	Rpl27	P61358	4						2	2						737885	822421	276379	320329				unique in satb	enriched
60S ribosomal protein L23 OS=Mus musculus GN=Rpl23 PE=1 SV=1	Rpl23	P62830	4							1	2					1.31595e+07	9.04301e+06	1.01938e+07	1.30294e+07				unique in satb	enriched
60S ribosomal protein L32 OS=Mus musculus GN=Rpl32 PE=2 SV=2	Rpl32	P62911	4						1							359178	561308	704375	449283				unique in satb	enriched
Ubiquitin-60S ribosomal protein L40 OS=Mus musculus GN=Uba52 PE=1 SV=2	Uba52	P62984	4					1								2.14842e+06	989771	3.82288e+06	3.96966e+06				unique in satb	enriched
60S ribosomal protein L36a OS=Mus musculus GN=Rpl36a PE=2 SV=2	Rpl36a	P83882	4						3		1					3.44845e+06	977208	1.55597e+06	3.12658e+06				unique in satb	enriched
Isoform 3 of MAP/microtubule affinity-regulating kinase 3 OS=Mus musculus GN=Mark3	Mark3	Q03141	4					5			5					1.56544e+07	5.93287e+06	1.86023e+07	1.0742e+07				unique in satb	enriched
Serine/threonine-protein phosphatase 2A 65 kDa regulatory subunit A alpha isoform OS=Mus musculus GN=Ppp2r1a PE=1 SV=3	Ppp2r1a	Q76MZ3	4								1					275111	214891	170380	424880				unique in satb	enriched
Ubiquitin carboxyl-terminal hydrolase BAP1 OS=Mus musculus GN=Bap1 PE=1 SV=1	Bap1	Q99PU7	4						2							204595	377331	476512	348982				unique in satb	enriched
60S ribosomal protein L17 OS=Mus musculus GN=Rpl17 PE=2 SV=3	Rpl17	Q9CPR4	4					3		1						2.76035e+06	1.39378e+06	575346	2.34632e+06				unique in satb	enriched
Peroxisomal bifunctional enzyme OS=Mus musculus GN=Ehhadh PE=1 SV=4	Ehhadh	Q9DBM2	4						1							115742	83789.6	82385.8	130528				unique in satb	enriched
Cyclin-dependent kinase 9 OS=Mus musculus GN=Cdk9 PE=1 SV=1	Cdk9	Q99J95	1						6							2.44503e+06	1.29457e+06	1.25795e+06	1.63594e+06				unique in satb	enriched
Terminal uridylyltransferase 4 OS=Mus musculus GN=Zcchc11 PE=1 SV=2	Zcchc11	B2RX14	1						1							226223	117876	61564.6	101572				unique in satb	enriched
Protein PRRC2C OS=Mus musculus GN=Prrc2c PE=1 SV=3	Prrc2c	Q3TLH4	1						7							3.66568e+06	2.89103e+06	4.8636e+06	2.96515e+06				unique in satb	enriched
Cysteine-rich protein 2-binding protein OS=Mus musculus GN=Csrp2bp PE=2 SV=2	Csrp2bp	Q8CID0	1						2							222630	432776	808233	189219				unique in satb	enriched
Histone deacetylase 1 OS=Mus musculus GN=Hdac1 PE=1 SV=1	Hdac1	D3YYI8	1						2							3.14801e+06	3.31651e+06	4.36279e+06	1.45326e+07				unique in satb	enriched
E3 ubiquitin-protein ligase TRIP12 OS=Mus musculus GN=Trip12 PE=1 SV=1	Trip12	G5E870	1					2	2	1						1.57032e+06	918254	1.12309e+06	2.56121e+06				unique in satb	enriched
Isoform 2 of Serine/threonine-protein kinase MARK2 OS=Mus musculus GN=Mark2	Mark2	Q05512	1					7			1					3.90683e+07	5.12256e+07	1.85919e+07	4.45513e+07				unique in satb	enriched
Histone deacetylase complex subunit SAP130 OS=Mus musculus GN=Sap130 PE=1 SV=2	Sap130	Q8BIH0	1						2							4.92519e+06	697899	559357	492420				unique in satb	enriched
Septin-11 OS=Mus musculus GN=Sept11 PE=1 SV=4	Sept11	Q8C1B7	1						2							3.92706e+06	1.88867e+06	1.65473e+06	5.84212e+06				unique in satb	enriched
Histone deacetylase 7 OS=Mus musculus GN=Hdac7 PE=1 SV=2	Hdac7	Q8C2B3	1						3							757190	1.36473e+06	1.34347e+06	1.44767e+06				unique in satb	enriched
Apolipoprotein O-like OS=Mus musculus GN=Apool PE=2 SV=1	Apool	Q78IK4	6						2							499797	590949	463464	465064				unique in satb	enriched
Endoplasmin OS=Mus musculus GN=Hsp90b1 PE=1 SV=2	Hsp90b1	P08113	6							2						450582	942987	547694	845992				unique in satb	enriched
Malate dehydrogenase, mitochondrial OS=Mus musculus GN=Mdh2 PE=1 SV=3	Mdh2	P08249	6							5						1.3158e+06	1.69016e+06	624335	791771				unique in satb	enriched
L-lactate dehydrogenase B chain OS=Mus musculus GN=Ldhb PE=1 SV=2	Ldhb	P16125	6							4						3.31863e+06	2.05945e+06	3.29818e+06	1.75488e+07				unique in satb	enriched
Peptidyl-prolyl cis-trans isomerase B OS=Mus musculus GN=Ppib PE=2 SV=2	Ppib	P24369	6							2						5.33214e+06	288110	768259	431882				unique in satb	enriched
Glutamate dehydrogenase 1, mitochondrial OS=Mus musculus GN=Glud1 PE=1 SV=1	Glud1	P26443	6							2						1.03578e+06	1.38899e+06	360580	312501				unique in satb	enriched
Voltage-dependent anion-selective channel protein 1 OS=Mus musculus GN=Vdac1 PE=1 SV=3	Vdac1	Q60932	6							3						490610	1.0111e+06	461317	373330				unique in satb	enriched
Tenascin OS=Mus musculus GN=Tnc PE=1 SV=1	Tnc	Q80YX1	6							1						10550.9	9474.35	13967.4	9178.35				unique in satb	enriched
Protein disulfide-isomerase A6 OS=Mus musculus GN=Pdia6 PE=1 SV=3	Pdia6	Q922R8	6							3						1.15141e+06	605525	754456	799108				unique in satb	enriched
DnaJ homolog subfamily B member 4 OS=Mus musculus GN=Dnajb4 PE=2 SV=1	Dnajb4	Q9D832	6						4							8.89569e+06	1.51244e+06	1.79376e+06	6.54754e+06				unique in satb	enriched
Chloride intracellular channel protein 1 OS=Mus musculus GN=Clic1 PE=1 SV=3	Clic1	Q9Z1Q5	6							1						65752.7	62971.6	67675.9	72126.3				unique in satb	enriched
Annexin A1 OS=Mus musculus GN=Anxa1 PE=1 SV=2	Anxa1	P10107	6							3						363116	1.19192e+06	533280	689397				unique in satb	enriched
Protein 1110037F02Rik OS=Mus musculus GN=1110037F02Rik PE=2 SV=1	1110037F02Rik	A2AIV2						8	8		4					2.04675e+07	1.48554e+07	2.87921e+07	2.64179e+07				unique in satb	enriched
Four and a half LIM domains protein 1 OS=Mus musculus GN=Fhl1 PE=2 SV=3	Fhl1	P97447								3						291230	121157	359667	987355				unique in satb	enriched
Transformer-2 protein homolog beta OS=Mus musculus GN=Tra2b PE=1 SV=1	Tra2b	P62996				2			3	3		853426	2.1413e+06	1.02234e+06	926049	5.23412e+06	2.42028e+06	2.20267e+06	2.1781e+06	2.43473	0.0246182	0.0670407	commonly detected	background
THO complex subunit 2 OS=Mus musculus GN=Thoc2 PE=2 SV=1	Thoc2	B1AZI6			1				2			200918	281907	123623	502037	238711	457861	692397	1.18191e+06	2.31927	0.121016	0.221017	commonly detected	background
Ribonucleoprotein PTB-binding 1 OS=Mus musculus GN=Raver1 PE=1 SV=2	Raver1	Q9CW46			6				14			3.78567e+07	5.76173e+06	1.0383e+07	1.18914e+07	1.82718e+07	2.0218e+07	2.96714e+07	2.57825e+07	1.4257	0.200997	0.319292	commonly detected	background
Histone lysine demethylase PHF8 OS=Mus musculus GN=Phf8 PE=1 SV=2	Phf8	Q80TJ7			1			1	2	1		170722	412896	2.08745e+06	738815	2.20876e+06	633588	215758	2.16629e+06	1.53214	0.579671	0.687936	commonly detected	background
Chromatin target of PRMT1 protein OS=Mus musculus GN=Chtop PE=1 SV=2	Chtop	Q9CY57		4	16	1	2	13	17	2	4	1.71896e+08	464642377	1.59623e+08	3.22348e+08	6.02974e+08	9.73023e+08	8.28733e+08	3.19426e+08	2.43552	0.0432658	0.100733	commonly detected	background
LIM and SH3 domain protein 1 (Fragment) OS=Mus musculus GN=Lasp1 PE=2 SV=1	Lasp1	A2A6H0			3				1	1		2.17926e+06	970985	1.2249e+06	3.46872e+06	403780	442807	565375	1.51912e+06	0.373679	0.0509499	0.112607	commonly detected	background
Lymphocyte-specific protein 1 OS=Mus musculus GN=Lsp1 PE=2 SV=1	Lsp1	A2A6J7		1	12	17		2	11	21		6.47856e+07	1.09914e+08	1.21959e+08	1.67859e+08	1.21599e+08	1.50312e+08	8.54744e+07	1.28176e+08	1.04531	0.742725	0.820765	commonly detected	background
Dedicator of cytokinesis protein 11 OS=Mus musculus GN=Dock11 PE=1 SV=1	Dock11	A2AF47			4				6			2.96854e+06	1.47494e+06	1.16569e+06	2.09467e+06	1.96371e+06	1.24042e+06	1.40616e+06	1.5986e+06	0.805948	0.488515	0.608151	commonly detected	background
116 kDa U5 small nuclear ribonucleoprotein component OS=Mus musculus GN=Eftud2 PE=2 SV=1	Eftud2	A2AH85			8	1	1		6	2		4.68808e+06	4.60656e+06	4.6887e+06	5.90471e+06	1.35871e+06	1.47613e+06	1.20175e+06	589068	0.232585	0.000448532	0.0040478	commonly detected	background
FACT complex subunit SSRP1 (Fragment) OS=Mus musculus GN=Ssrp1 PE=2 SV=1	Ssrp1	A2AW05			1	2			1	1		593313	580601	199409	414191	450242	165999	361440	501829	0.827692	0.621799	0.72385	commonly detected	background
Lysine-specific histone demethylase 1A OS=Mus musculus GN=Kdm1a PE=1 SV=2	Kdm1a	A3KG93			2				3			4.73705e+06	1541270	2.08099e+06	547928	1.48879e+06	1.64918e+06	2.27462e+06	4.05442e+06	1.06284	0.634278	0.732783	commonly detected	background
Apoptosis-inducing factor 1, mitochondrial OS=Mus musculus GN=Aifm1 PE=1 SV=1	Aifm1	B1AU25			2				1			104817	343664	281096	320657	65802.2	57396.7	103479	46441.7	0.260056	0.00721903	0.0244645	commonly detected	background
Adenomatosis polyposis coli OS=Mus musculus GN=Apc PE=2 SV=1	Apc	B2RUG9		1				1	5		1	2.34993e+06	623321	1.75486e+06	1.44121e+06	1.84329e+06	2.07001e+06	2.99498e+06	2.84886e+06	1.58156	0.128991	0.231426	commonly detected	background
RNA-binding protein 25 OS=Mus musculus GN=Rbm25 PE=1 SV=2	Rbm25	B2RY56			2	1			3	1		515267	790983	267136	631791	403689	554767	244438	810533	0.913046	0.761565	0.832535	commonly detected	background
60S ribosomal protein L23a OS=Mus musculus GN=Rpl23a PE=1 SV=1	Rpl23a	D3YU45				2			1	2		654252	1.5259e+06	406891	1.38691e+06	2.67512e+06	820930	562043	937755	1.25715	0.708564	0.79211	commonly detected	background
Septin-1 OS=Mus musculus GN=Sept1 PE=2 SV=2	Sept1	D3YVG1			2				1			7.71952e+06	2.94911e+06	4.71912e+06	2.27975e+06	160202	131317	117352	234493	0.0364151	4.4235e-05	0.000825426	commonly detected	background
Scaffold attachment factor B1 OS=Mus musculus GN=Safb PE=1 SV=2	Safb	D3YXK2			3		1	3	6		1	7.67819e+06	3.0759e+06	5.58834e+06	4.02311e+06	1.02334e+07	6.53644e+06	5.02577e+06	4.59041e+06	1.29562	0.357795	0.485012	commonly detected	background
60S ribosomal protein L13a OS=Mus musculus GN=Rpl13a PE=1 SV=4	Rpl13a	D3YY61			2	1			2			690224	4.09279e+06	1.13914e+06	671354	848940	501672	208456	781179	0.354932	0.157043	0.263154	commonly detected	background
Bromodomain-containing protein 8 OS=Mus musculus GN=Brd8 PE=2 SV=1	Brd8	D3YZC7			3				2			2.94726e+06	1992901	4.50918e+06	3.37977e+06	904154	764832	1.32888e+06	636103	0.28326	0.00159796	0.00929515	commonly detected	background
U1 small nuclear ribonucleoprotein A OS=Mus musculus GN=Snrpa PE=2 SV=3	Snrpa	D3Z0S6			2				2			514862	974211	941754	2.54342e+06	1.14933e+06	957039	371653	1.46191e+06	0.792064	0.709003	0.79211	commonly detected	background
Rho guanine nucleotide exchange factor 1 OS=Mus musculus GN=Arhgef1 PE=2 SV=1	Arhgef1	E9PUF7			2	2			1	3		1.32229e+06	1.32047e+06	428757	1.36367e+06	507136	1.60439e+06	874109	3.01212e+06	1.35231	0.711656	0.792172	commonly detected	background
Septin-7 OS=Mus musculus GN=Sept7 PE=1 SV=1	Sept7	E9Q1G8			2				2			2.92093e+06	1.84632e+06	506000	4.7681e+06	2.25024e+06	3.22851e+06	1.7736e+06	7.5575e+06	1.47489	0.416535	0.540609	commonly detected	background
Septin-2 OS=Mus musculus GN=Sept2 PE=1 SV=2	Sept2	E9Q3V6			4				2	1		7.07422e+06	2258685	1.88664e+06	1.57061e+06	1.21244e+06	612457	531178	898263	0.254441	0.019536	0.0556868	commonly detected	background
Tropomyosin alpha-1 chain OS=Mus musculus GN=Tpm1 PE=2 SV=1	Tpm1	E9Q453			10	17		1	6	22		5.22537e+07	6.77781e+07	6.87971e+07	6.13747e+07	3.18412e+07	3.12772e+07	3.59283e+07	3.07066e+07	0.51859	0.000105609	0.00146412	commonly detected	background
Desmoplakin OS=Mus musculus GN=Dsp PE=2 SV=1	Dsp	E9Q557			2	1		2	1			1.04097e+06	571065	679316	665369	3.16409e+06	774064	1.47394e+06	2.13887e+06	2.55383	0.042055	0.0991798	commonly detected	background
Voltage-dependent anion-selective channel protein 2 OS=Mus musculus GN=Vdac2 PE=1 SV=2	Vdac2	G3UX26			1					4		2.24545e+06	342876	754127	641942	609580	1.70073e+06	678110	405190	0.851725	0.896301	0.929836	commonly detected	background
FACT complex subunit SPT16 OS=Mus musculus GN=Supt16h PE=1 SV=2	Supt16h	G3X956			2	7		1	2	8		1.83688e+07	6.77513e+06	5.19711e+06	6.68241e+06	2.57452e+06	2.7144e+06	4.25427e+06	4.38747e+06	0.376266	0.0315156	0.0814009	commonly detected	background
F-box only protein 50 OS=Mus musculus GN=Nccrp1 PE=2 SV=2	Nccrp1	G3X9C2		1	2			1				1.65336e+06	354646	495210	1.46904e+06	527593	221917	382450	999554	0.5366	0.300795	0.422776	commonly detected	background
T-complex protein 1 subunit delta OS=Mus musculus GN=Cct4 PE=1 SV=3	Cct4	G5E839			1					1	1	477258	594291	159428	504598	955519	497920	148845	367868	1.13516	0.948226	0.960827	commonly detected	background
Phosphate carrier protein, mitochondrial OS=Mus musculus GN=Slc25a3 PE=1 SV=1	Slc25a3	G5E902			1					1		494734	1.34787e+06	423974	417086	662463	368869	388028	39494.6	0.543605	0.255216	0.381573	commonly detected	background
Serine/arginine-rich splicing factor 1 OS=Mus musculus GN=Srsf1 PE=1 SV=3	Srsf1	H7BX95			1	2				3		527300	1.18924e+06	204357	749072	481588	266216	383059	666739	0.673268	0.54594	0.660059	commonly detected	background
60S ribosomal protein L10-like OS=Mus musculus GN=Rpl10l PE=2 SV=1	Rpl10l	I7HLV2			6				1	1		4.863e+06	4.09995e+06	5.72169e+06	5.21733e+06	532965	455245	283968	668640	0.0975189	1.8707e-05	0.0005507	commonly detected	background
Heterogeneous nuclear ribonucleoprotein A1 OS=Mus musculus GN=Hnrnpa1 PE=1 SV=2	Hnrnpa1	J3QK72			2					1		1.8795e+06	1371557	1.97639e+06	466209	319127	71345.1	69425.7	50788.3	0.0896939	0.00289061	0.0131588	commonly detected	background
Galectin-9 OS=Mus musculus GN=Lgals9 PE=1 SV=1	Lgals9	O08573			2	1			1	3		388261	1058351	383019	4.1343e+06	585968	673093	402973	1.79927e+06	0.580372	0.761172	0.832535	commonly detected	background
THO complex subunit 4 OS=Mus musculus GN=Alyref PE=1 SV=3	Alyref	O08583			10	1			14	3		7.07417e+07	1.62142e+08	1.22192e+08	8.42512e+07	1.03135e+08	1.36874e+08	1.31703e+08	7.30331e+07	1.01233	0.887099	0.926593	commonly detected	background
Prohibitin-2 OS=Mus musculus GN=Phb2 PE=1 SV=1	Phb2	O35129			2					2		1.27665e+06	856773	638727	1.6527e+06	177248	329165	300757	278952	0.24546	0.001617	0.00929515	commonly detected	background
Putative pre-mRNA-splicing factor ATP-dependent RNA helicase DHX15 OS=Mus musculus GN=Dhx15 PE=2 SV=2	Dhx15	O35286			1		1		1		1	2.17843e+06	551354	1.592e+06	739198	1.13668e+06	960247	2.32453e+06	1.28808e+06	1.12815	0.595876	0.699008	commonly detected	background
FYN-binding protein OS=Mus musculus GN=Fyb PE=1 SV=2	Fyb	O35601			1				5			185424	363677	475025	1.17729e+06	2.48414e+06	1.41617e+06	1.15874e+06	2.96975e+06	3.64711	0.0173643	0.0504393	commonly detected	background
Dolichyl-diphosphooligosaccharide--protein glycosyltransferase 48 kDa subunit OS=Mus musculus GN=Ddost PE=1 SV=2	Ddost	O54734			2				1			1.95675e+06	1.36314e+06	2.31351e+06	1.24217e+06	1.43178e+06	677783	403320	968941	0.506405	0.0498957	0.111253	commonly detected	background
Pro-interleukin-16 OS=Mus musculus GN=Il16 PE=1 SV=3	Il16	O54824			12	20			7	14	1	4.43466e+07	3.04991e+07	3.5342e+07	2.57711e+07	2.22e+07	2.20049e+07	2.98154e+07	1.88866e+07	0.683346	0.0461262	0.106579	commonly detected	background
Aurora kinase B OS=Mus musculus GN=Aurkb PE=1 SV=2	Aurkb	O70126			2	3	1		3	7		2.42004e+06	2.43347e+06	1.83251e+06	3.96962e+06	5.08279e+06	2.53808e+06	3.12262e+06	8.17264e+06	1.77522	0.147739	0.253148	commonly detected	background
Ataxin-2 OS=Mus musculus GN=Atxn2 PE=1 SV=1	Atxn2	O70305			1				4			3.1094e+06	881269	878054	1.60076e+06	5.83519e+06	3.10797e+06	2.88522e+06	1.46073e+06	2.05412	0.120658	0.221017	commonly detected	background
Heterogeneous nuclear ribonucleoproteins A2/B1 OS=Mus musculus GN=Hnrnpa2b1 PE=1 SV=2	Hnrnpa2b1	O88569			4				6	3		3.77137e+06	3.7963e+06	3.6091e+06	5.03837e+06	3.20531e+06	1.70867e+06	2.33354e+06	1.49434e+06	0.539117	0.0128448	0.0387887	commonly detected	background
Coronin-1A OS=Mus musculus GN=Coro1a PE=1 SV=5	Coro1a	O89053			3		1		2			4.55717e+06	6.05235e+06	3.42617e+07	7.67935e+06	2.91808e+06	3.81119e+06	3.51156e+06	6.76441e+06	0.323598	0.138662	0.244461	commonly detected	background
Thy-1 membrane glycoprotein OS=Mus musculus GN=Thy1 PE=1 SV=1	Thy1	P01831				5		1		6		9.02865e+06	1.61907e+07	1.19484e+07	6.38514e+06	1.0299e+07	1.48866e+07	9.59239e+06	6.84391e+06	0.955662	0.923023	0.944705	commonly detected	background
Tubulin alpha-1B chain OS=Mus musculus GN=Tuba1b PE=1 SV=2	Tuba1b	P05213			12	5	2	5	10	9	3	7.43467e+07	5.78789e+07	2.31614e+07	5.00882e+07	2.64524e+07	6.38294e+07	3.45685e+07	7.12515e+07	0.954382	0.899563	0.930057	commonly detected	background
Heat shock protein HSP 90-alpha OS=Mus musculus GN=Hsp90aa1 PE=1 SV=4	Hsp90aa1	P07901			3		2	3				1.04547e+07	1.37159e+07	4.08858e+06	9.09358e+06	4.65311e+06	8.66648e+06	1.71174e+07	6.77221e+06	0.996157	0.933536	0.951271	commonly detected	background
Phosphoglycerate kinase 1 OS=Mus musculus GN=Pgk1 PE=1 SV=4	Pgk1	P09411			2					1		104441	282669	533546	459432	166476	65822.2	295580	139826	0.483813	0.199957	0.319292	commonly detected	background
Chromosome transmission fidelity protein 8 homolog isoform 2 OS=Mus musculus GN=Chtf8 PE=2 SV=1	Chtf8	P0CG14			5			1	9			4.40389e+07	2.07263e+07	3.06215e+07	1.34616e+08	7.17206e+07	1.81693e+07	1.78615e+07	3.06612e+07	0.601788	0.453299	0.571306	commonly detected	background
Elongation factor 1-alpha 1 OS=Mus musculus GN=Eef1a1 PE=1 SV=3	Eef1a1	P10126			21	1		2	27	2		1.5797e+08	3.03614e+08	2.1798e+08	3.08637e+08	2.36445e+08	3.40648e+08	3.59202e+08	2.93841e+08	1.24482	0.236836	0.359341	commonly detected	background
Heat shock protein HSP 90-beta OS=Mus musculus GN=Hsp90ab1 PE=1 SV=3	Hsp90ab1	P11499		2	4	1	1	4	2	2		5.9803e+06	4.74072e+06	6.75671e+06	4.51757e+06	5.62918e+06	1.46663e+06	3.99302e+06	2.44254e+06	0.615194	0.10259	0.195562	commonly detected	background
T-complex protein 1 subunit alpha OS=Mus musculus GN=Tcp1 PE=1 SV=3	Tcp1	P11983			1					1		352252	788221	264570	1.14589e+06	26603.8	30398.6	20357.4	10808.1	0.034563	0.000212794	0.00249624	commonly detected	background
Complement C1q subcomponent subunit B OS=Mus musculus GN=C1qb PE=1 SV=2	C1qb	P14106		1	3			1	2			1.84336e+07	1.72514e+07	8.53602e+06	1.69813e+07	6.62314e+06	1.99991e+06	4.28754e+06	3.43633e+06	0.267097	0.00438704	0.0176059	commonly detected	background
Lamin-B1 OS=Mus musculus GN=Lmnb1 PE=1 SV=3	Lmnb1	P14733		4	6			2	2	2	3	9.11603e+07	3.43946e+07	5.98441e+07	4.3343e+07	4.31277e+06	3.54145e+06	4.00741e+06	4.42792e+06	0.0712136	2.16669e-05	0.0005507	commonly detected	background
60S acidic ribosomal protein P0 OS=Mus musculus GN=Rplp0 PE=1 SV=3	Rplp0	P14869			1	8			3	7		7.4402e+06	6.34729e+06	6.51546e+06	9.90627e+06	6.41329e+06	6.89695e+06	9.82229e+06	1.05455e+07	1.11483	0.550147	0.660059	commonly detected	background
Histone H1.2 OS=Mus musculus GN=Hist1h1c PE=1 SV=2	Hist1h1c	P15864		12	1	7	2	14	7	10	3	1.20193e+08	1.14287e+08	7.2373e+07	1.49633e+08	5.24237e+08	5.33476e+07	4.82579e+07	1.03177e+08	1.59703	0.977898	0.984353	commonly detected	background
Spectrin alpha chain, non-erythrocytic 1 OS=Mus musculus GN=Sptan1 PE=1 SV=4	Sptan1	P16546			24	137			40	150		3.61658e+08	4.57656e+08	2.7359e+08	3.68715e+08	5.82795e+08	6.07864e+08	5.41632e+08	7.90315e+08	1.7259	0.0061939	0.0219667	commonly detected	background
Glyceraldehyde-3-phosphate dehydrogenase OS=Mus musculus GN=Gapdh PE=1 SV=2	Gapdh	P16858			4	2			5	4	1	2.01209e+06	3.5129e+06	4.41028e+06	3.3297e+06	8.23323e+06	3.94589e+06	4.1213e+06	3.14647e+06	1.46603	0.235325	0.35887	commonly detected	background
Alpha-enolase OS=Mus musculus GN=Eno1 PE=1 SV=3	Eno1	P17182			1					4		484206	273987	1.08107e+06	223566	691052	343926	326450	897087	1.09486	0.670851	0.761469	commonly detected	background
Peptidyl-prolyl cis-trans isomerase A OS=Mus musculus GN=Ppia PE=1 SV=2	Ppia	P17742			1					3		501245	268936	529609	93029.8	7.62887e+06	794823	1.49054e+06	1.60222e+06	8.26844	0.0222556	0.062275	commonly detected	background
Triosephosphate isomerase OS=Mus musculus GN=Tpi1 PE=1 SV=4	Tpi1	P17751			1					2		114290	78314.6	69523.9	24840.6	97757.9	170842	156462	359996	2.73569	0.0514111	0.112808	commonly detected	background
Cofilin-1 OS=Mus musculus GN=Cfl1 PE=1 SV=3	Cfl1	P18760			2	1			1			202109	1853956	431544	695931	1.8604e+06	754542	388335	1.76524e+06	1.49787	0.402789	0.525003	commonly detected	background
78 kDa glucose-regulated protein OS=Mus musculus GN=Hspa5 PE=1 SV=3	Hspa5	P20029			5	4		5	5			1.05414e+07	6.34056e+06	1.41543e+07	8.7481e+06	6.28116e+06	4.23409e+06	4.50064e+06	7.35177e+06	0.562223	0.0397492	0.0954607	commonly detected	background
Tropomyosin alpha-3 chain OS=Mus musculus GN=Tpm3 PE=1 SV=3	Tpm3	P21107			21	40			20	32		2.96909e+08	3.03401e+08	4.70763e+08	4.33921e+08	3.60461e+08	9.79814e+07	1.70469e+08	3.3834e+08	0.642695	0.147493	0.253148	commonly detected	background
Alpha-crystallin B chain OS=Mus musculus GN=Cryab PE=1 SV=2	Cryab	P23927					1			1		1.16509e+06	2.45266e+06	5.73325e+06	4.39645e+06	535026	1.79238e+06	677064	681454	0.268117	0.0284405	0.0760907	commonly detected	background
DNA replication licensing factor MCM3 OS=Mus musculus GN=Mcm3 PE=1 SV=2	Mcm3	P25206			3		3	1	2		2	2.83392e+06	6.60794e+06	2.53291e+06	4.16291e+06	3.55156e+06	4.07956e+06	4.94802e+06	3.4573e+06	0.993726	0.81452	0.868632	commonly detected	background
Ezrin OS=Mus musculus GN=Ezr PE=1 SV=3	Ezr	P26040			1			1				4.40574e+06	1392541	340879	3.10188e+06	530088	806708	838678	1.18195e+06	0.363316	0.29273	0.414401	commonly detected	background
Small nuclear ribonucleoprotein-associated protein B OS=Mus musculus GN=Snrpb PE=1 SV=1	Snrpb	P27048			3		1		2			9.39363e+06	8592343	1.59001e+07	3.17156e+06	1.3874e+06	3.26997e+06	6.34215e+06	2.58125e+06	0.366477	0.0725843	0.148579	commonly detected	background
Isoform 2 of Microtubule-associated protein 4 OS=Mus musculus GN=Map4	Map4	P27546		1			1	2			1	3.46042e+08	7.53442e+07	4.17842e+08	6.02065e+07	1.61621e+08	1.33923e+08	2.75444e+07	4.26241e+07	0.406603	0.266224	0.393164	commonly detected	background
60S ribosomal protein L3 OS=Mus musculus GN=Rpl3 PE=2 SV=3	Rpl3	P27659			5	3			5	4		5.89011e+06	9.37397e+06	7.32559e+06	1.19717e+07	8.66966e+06	7.29376e+06	9.91232e+06	3.33025e+07	1.71227	0.371116	0.49645	commonly detected	background
Developmentally-regulated GTP-binding protein 1 OS=Mus musculus GN=Drg1 PE=1 SV=1	Drg1	P32233			6				6			8.49488e+06	3.07525e+06	5.52719e+06	3.73453e+06	4.88982e+06	2.05513e+06	1.46262e+06	6.30163e+06	0.706092	0.327747	0.458545	commonly detected	background
Chromosome-associated kinesin KIF4 OS=Mus musculus GN=Kif4 PE=1 SV=3	Kif4	P33174					1		3			4.42625e+06	1.49231e+06	2.45375e+06	993271	608545	1.07372e+06	1.87908e+06	2.69231e+06	0.667728	0.421095	0.541916	commonly detected	background
Protein NEDD1 OS=Mus musculus GN=Nedd1 PE=2 SV=2	Nedd1	P33215			2				2		1	2.12675e+06	1031076	502357	1.79134e+06	816864	1.40072e+06	961105	759572	0.722415	0.564562	0.672623	commonly detected	background
rRNA 2'-O-methyltransferase fibrillarin OS=Mus musculus GN=Fbl PE=1 SV=2	Fbl	P35550				2				3		570290	193000	201135	128284	369481	1.14684e+06	548075	796478	2.61815	0.0403143	0.0960614	commonly detected	background
60S ribosomal protein L12 OS=Mus musculus GN=Rpl12 PE=1 SV=2	Rpl12	P35979			5	3			4		1	1.94405e+07	1.50049e+07	7.7254e+06	2.68272e+07	1.3499e+07	7.76077e+06	1.15981e+07	1.56664e+07	0.703271	0.379209	0.502196	commonly detected	background
Stress-70 protein, mitochondrial OS=Mus musculus GN=Hspa9 PE=1 SV=3	Hspa9	P38647		2	4	2	1	2	6	1		3.87008e+06	6.42713e+06	5.94491e+06	1.0941e+07	5.21419e+06	4.04707e+06	6.40924e+06	3.90045e+06	0.719968	0.292706	0.414401	commonly detected	background
Dynamin-2 OS=Mus musculus GN=Dnm2 PE=1 SV=2	Dnm2	P39054			5				5			4.6289e+06	4.25741e+06	5.04618e+06	4.72156e+06	1.80552e+06	2.652e+06	4.94183e+06	3.8227e+06	0.708803	0.113345	0.213397	commonly detected	background
Transketolase OS=Mus musculus GN=Tkt PE=1 SV=1	Tkt	P40142			2		1	1		1		2.22424e+06	1.08166e+06	2.05627e+06	2.07813e+06	475582	1.08228e+06	43767.9	553968	0.28972	0.0587634	0.127112	commonly detected	background
Chromodomain-helicase-DNA-binding protein 1 OS=Mus musculus GN=Chd1 PE=1 SV=3	Chd1	P40201				2				3		594670	318844	754709	2.37313e+06	889888	1.48412e+06	824102	4.47348e+06	1.89827	0.289226	0.414401	commonly detected	background
60S ribosomal protein L28 OS=Mus musculus GN=Rpl28 PE=1 SV=2	Rpl28	P41105			10				8	1	1	2.85008e+07	2.35118e+07	1.63294e+07	9.23565e+07	5.31828e+07	4.26601e+07	6.86397e+07	4.9488e+07	1.3315	0.23799	0.359341	commonly detected	background
Histone H1.1 OS=Mus musculus GN=Hist1h1a PE=1 SV=2	Hist1h1a	P43275		9	7	2	2	11	11	6	2	2.53336e+08	2.7324e+07	8.24583e+07	1.13106e+08	1.11338e+09	3.43786e+08	1.25031e+08	2.83169e+08	3.91699	0.0836362	0.164574	commonly detected	background
F-actin-capping protein subunit alpha-2 OS=Mus musculus GN=Capza2 PE=1 SV=3	Capza2	P47754			3	13			5	13		4.52971e+07	4.75157e+07	5.30867e+07	8.339e+07	3.31186e+07	9.47823e+07	9.36748e+07	6.95702e+07	1.26977	0.525352	0.640228	commonly detected	background
F-actin-capping protein subunit beta OS=Mus musculus GN=Capzb PE=1 SV=3	Capzb	P47757			4	25		1	7	27		1.85809e+08	5.6316e+07	4.92321e+07	7.9668e+07	2.02657e+08	8.16573e+07	7.29473e+07	7.77737e+07	1.17252	0.609595	0.712362	commonly detected	background
60S ribosomal protein L29 OS=Mus musculus GN=Rpl29 PE=2 SV=2	Rpl29	P47915			2	2	1	3	4	2		1.1676e+07	3.43355e+06	640646	5.84856e+06	1.63812e+07	4.76029e+06	2.23589e+06	9.11464e+06	1.50434	0.46318	0.581358	commonly detected	background
60S ribosomal protein L13 OS=Mus musculus GN=Rpl13 PE=2 SV=3	Rpl13	P47963		1	8	3	1	2	9	2	2	1.65289e+07	8.53081e+06	8.21412e+06	9.56709e+06	1.1389e+07	1.61017e+07	1.38542e+07	8.83735e+06	1.17136	0.427922	0.548388	commonly detected	background
Hematopoietic lineage cell-specific protein OS=Mus musculus GN=Hcls1 PE=1 SV=2	Hcls1	P49710			5	16		1	3	8		2.82166e+07	2.34293e+07	6.68073e+07	2.06499e+07	9.54252e+06	2.43148e+07	6.87928e+07	3.42018e+07	0.983817	0.801661	0.857918	commonly detected	background
DNA replication licensing factor MCM5 OS=Mus musculus GN=Mcm5 PE=2 SV=1	Mcm5	P49718			1		4		1			1.3485e+07	6.58483e+06	1.04393e+07	9.87494e+06	313280	271567	402653	350050	0.0331207	1.04708e-06	0.000106453	commonly detected	background
60S ribosomal protein L9 OS=Mus musculus GN=Rpl9 PE=2 SV=2	Rpl9	P51410			3	1			2			3.93272e+06	8.20247e+06	1.47717e+07	2.59084e+06	587238	726527	1.81334e+06	783637	0.132578	0.00601785	0.0218505	commonly detected	background
Peroxisomal multifunctional enzyme type 2 OS=Mus musculus GN=Hsd17b4 PE=1 SV=3	Hsd17b4	P51660			5				5			4.51517e+06	5.75167e+06	1.60002e+07	1.23675e+07	1.27247e+06	1.63805e+06	2.80412e+06	3.02453e+06	0.226201	0.00837343	0.0274613	commonly detected	background
ADP/ATP translocase 2 OS=Mus musculus GN=Slc25a5 PE=1 SV=3	Slc25a5	P51881		1	12	4	3	1	12	12	1	3.58514e+07	3.13785e+07	3.04766e+07	3.13918e+07	2.11388e+07	2.04189e+07	1.14698e+07	2.14312e+07	0.576759	0.00986674	0.0313475	commonly detected	background
Pyruvate kinase PKM OS=Mus musculus GN=Pkm PE=1 SV=4	Pkm	P52480			1					4		1.14438e+06	1.49651e+06	417901	811006	1.92084e+06	1.02183e+06	2.48205e+06	1.32141e+06	1.74328	0.125965	0.228686	commonly detected	background
ATP synthase subunit beta, mitochondrial OS=Mus musculus GN=Atp5b PE=1 SV=2	Atp5b	P56480			11			2	9	2	1	3.61478e+07	20120417	3.88949e+07	2.48334e+07	1.10116e+07	7.56598e+06	7.16287e+06	1.15838e+07	0.311045	0.00116554	0.00756361	commonly detected	background
Ladinin-1 OS=Mus musculus GN=Lad1 PE=1 SV=1	Lad1	P57016				5				1		619694	713892	516730	521079	58931.4	224465	96849.9	66769.7	0.188503	0.00113829	0.00754736	commonly detected	background
Alpha-actinin-4 OS=Mus musculus GN=Actn4 PE=1 SV=1	Actn4	P57780			12	18		2	25	16		1.39725e+07	2.53846e+07	9.81526e+06	2.21005e+07	2.52735e+07	4.46989e+07	1.54374e+07	3.02629e+07	1.62296	0.171252	0.279315	commonly detected	background
Elongation factor 2 OS=Mus musculus GN=Eef2 PE=1 SV=2	Eef2	P58252			3				2			1.87086e+06	1.45964e+06	564736	1.06422e+06	2.58032e+06	715750	790513	2.58577e+06	1.34538	0.653288	0.74907	commonly detected	background
Protein FAM207A OS=Mus musculus GN=Fam207a PE=1 SV=1	Fam207a	P58468			6		1	2	6		1	1.24679e+07	1.42579e+07	1.19827e+07	1.57819e+07	1.29496e+07	1.15484e+07	1.3788e+07	6.69249e+06	0.825438	0.254125	0.381573	commonly detected	background
Actin-related protein 2/3 complex subunit 4 OS=Mus musculus GN=Arpc4 PE=1 SV=3	Arpc4	P59999			2	3			2	4		3.41184e+06	2.75205e+06	2.52703e+06	2.95105e+06	3.90982e+06	4.6789e+06	3.12019e+06	5.67652e+06	1.49334	0.036209	0.0890624	commonly detected	background
RuvB-like 1 OS=Mus musculus GN=Ruvbl1 PE=1 SV=1	Ruvbl1	P60122			6			1	7			2.59051e+07	2.27325e+07	3.74526e+07	2.36969e+07	1.31162e+07	1.63707e+07	2.54666e+07	1.83445e+07	0.667638	0.0607307	0.129531	commonly detected	background
Poly(rC)-binding protein 1 OS=Mus musculus GN=Pcbp1 PE=1 SV=1	Pcbp1	P60335			2				2	1		294449	873609	1.10568e+06	276295	1.32401e+06	733326	777680	1.44629e+06	1.67893	0.152246	0.257973	commonly detected	background
Actin-related protein 2 OS=Mus musculus GN=Actr2 PE=1 SV=1	Actr2	P61161			4	16			6	16		2.17971e+07	4.81889e+07	7.77498e+07	9.39372e+07	4.38013e+07	1.59787e+07	3.74845e+07	4.43433e+07	0.585948	0.290039	0.414401	commonly detected	background
60S ribosomal protein L26 OS=Mus musculus GN=Rpl26 PE=2 SV=1	Rpl26	P61255			4			1	7			1.14912e+07	6.69992e+06	7.91383e+06	1.00945e+07	8.83636e+06	9.91211e+06	9.58247e+06	8.2573e+06	1.01074	0.822995	0.874612	commonly detected	background
Serine/threonine-protein phosphatase PP1-beta catalytic subunit OS=Mus musculus GN=Ppp1cb PE=1 SV=3	Ppp1cb	P62141			3	6			3	9		4.44377e+06	6.09254e+06	3.07883e+06	5.15038e+06	3.31316e+06	3.51983e+06	9.10179e+06	4.4351e+06	1.0855	0.935677	0.951271	commonly detected	background
40S ribosomal protein S8 OS=Mus musculus GN=Rps8 PE=1 SV=2	Rps8	P62242			3	2		1		2		388872	578286	273814	144073	874869	1.78329e+06	264090	224124	2.27168	0.348719	0.476948	commonly detected	background
14-3-3 protein epsilon OS=Mus musculus GN=Ywhae PE=1 SV=1	Ywhae	P62259		1	2			2		1		2.09467e+06	661227	1.3482e+06	1.32669e+06	1.46817e+06	960227	506447	540230	0.639885	0.228856	0.35432	commonly detected	background
40S ribosomal protein S23 OS=Mus musculus GN=Rps23 PE=2 SV=3	Rps23	P62267			1				2			392985	401341	1.1921e+06	2.15613e+06	639430	707706	1.48125e+06	1.30028e+06	0.996646	0.698578	0.786222	commonly detected	background
40S ribosomal protein S11 OS=Mus musculus GN=Rps11 PE=2 SV=3	Rps11	P62281			7	1			6		1	1.72415e+07	2.62059e+07	2.07814e+07	2.1686e+07	1.72111e+07	1.57248e+07	2.22846e+07	1.55944e+07	0.824246	0.157852	0.263154	commonly detected	background
40S ribosomal protein S13 OS=Mus musculus GN=Rps13 PE=1 SV=2	Rps13	P62301			3				3			1.01315e+07	1.12653e+07	1.59095e+07	1.54807e+07	940269	1.02559e+06	1.04147e+06	1.48767e+06	0.0851535	3.54184e-06	0.000270065	commonly detected	background
40S ribosomal protein S4, X isoform OS=Mus musculus GN=Rps4x PE=2 SV=2	Rps4x	P62702		3	17	2	5	8	15	7	5	1.5536e+08	3.49118e+08	2.06796e+08	1.80633e+08	1.96459e+08	1.77587e+08	1.24637e+08	1.37047e+08	0.712776	0.187906	0.301638	commonly detected	background
40S ribosomal protein S6 OS=Mus musculus GN=Rps6 PE=1 SV=1	Rps6	P62754		1	10	10	2	7	18	11	1	4.44002e+07	6.38541e+07	4.506e+07	4.43047e+07	1.64516e+08	1.13645e+08	3.83674e+07	1.8675e+08	2.54671	0.0766952	0.153895	commonly detected	background
Histone H4 OS=Mus musculus GN=Hist1h4a PE=1 SV=2	Hist1h4a	P62806				2		2		4		3.12398e+06	4.95147e+06	2.46695e+06	3.37521e+06	3.05867e+06	2.33129e+06	3.7692e+06	7.86876e+06	1.22348	0.691995	0.781699	commonly detected	background
40S ribosomal protein S25 OS=Mus musculus GN=Rps25 PE=2 SV=1	Rps25	P62852			4				4	1		712000	1.05039e+06	1.80988e+06	869717	1.61253e+06	1.31237e+06	1.08649e+06	507281	1.01726	0.994505	0.994505	commonly detected	background
60S ribosomal protein L31 OS=Mus musculus GN=Rpl31 PE=2 SV=1	Rpl31	P62900			1				1	2		358411	2.11477e+06	1.37466e+06	2.14747e+06	379353	1.1667e+06	190376	167987	0.317651	0.084286	0.16479	commonly detected	background
40S ribosomal protein S3 OS=Mus musculus GN=Rps3 PE=1 SV=1	Rps3	P62908		1	13	16		4	8	11		2.08683e+07	1.9202e+07	8.69783e+06	1.63503e+07	1.40713e+07	8.22909e+06	1.00727e+07	1.17267e+07	0.677224	0.169453	0.277866	commonly detected	background
60S ribosomal protein L8 OS=Mus musculus GN=Rpl8 PE=2 SV=2	Rpl8	P62918		1	11	10	1	4	6	9		2.09298e+07	3.25791e+07	1.96103e+07	3.11226e+07	5.90689e+07	3.66013e+07	1.87035e+07	5.28377e+07	1.60407	0.209211	0.328914	commonly detected	background
Heat shock cognate 71 kDa protein OS=Mus musculus GN=Hspa8 PE=1 SV=1	Hspa8	P63017		4	13	9	5	10	18	5	3	5.03058e+07	3.17425e+07	3.07396e+07	6.61658e+07	8.26968e+07	2.99362e+07	4.85458e+07	3.91965e+07	1.11971	0.754904	0.831212	commonly detected	background
60 kDa heat shock protein, mitochondrial OS=Mus musculus GN=Hspd1 PE=1 SV=1	Hspd1	P63038					1			2		2.44628e+06	1.67049e+06	6.7717e+06	2.41066e+06	134363	150414	152797	129982	0.0426763	6.12444e-05	0.000983133	commonly detected	background
Serine/threonine-protein phosphatase PP1-gamma catalytic subunit OS=Mus musculus GN=Ppp1cc PE=1 SV=1	Ppp1cc	P63087			2	6			2	8		5.59927e+06	4.42288e+06	4.93323e+06	6.63801e+06	4.2803e+06	6.39563e+06	5.74013e+06	4.24725e+06	0.956926	0.731776	0.811607	commonly detected	background
14-3-3 protein zeta/delta OS=Mus musculus GN=Ywhaz PE=1 SV=1	Ywhaz	P63101		1	2					2		1.74815e+06	2.48441e+06	2.02045e+06	1.15205e+07	86691.8	47936.7	95965	455137	0.0385816	0.00222665	0.0115106	commonly detected	background
Actin, cytoplasmic 2 OS=Mus musculus GN=Actg1 PE=1 SV=1	Actg1	P63260			41	51		12	45	48		7.0677e+09	7.70237e+09	3.14687e+09	7.14685e+09	2.69212e+09	6.02499e+09	4.10252e+09	3.65149e+09	0.657168	0.18354	0.296189	commonly detected	background
Prohibitin OS=Mus musculus GN=Phb PE=1 SV=1	Phb	P67778			3				3			2.21228e+06	1.11501e+06	700280	1.10835e+06	2.00465e+06	587499	880545	521302	0.777659	0.443967	0.563936	commonly detected	background
Actin, alpha cardiac muscle 1 OS=Mus musculus GN=Actc1 PE=1 SV=1	Actc1	P68033				26		7	24	25		3.28528e+09	2.73035e+09	2.13853e+09	4.09536e+09	1.68401e+09	3.88144e+09	1.87451e+09	1.79337e+09	0.75377	0.231926	0.35726	commonly detected	background
Histone H3.1 OS=Mus musculus GN=Hist1h3a PE=1 SV=2	Hist1h3a	P68433				5		1	2	3		1.07444e+07	1.97321e+07	9.79016e+06	8.8169e+06	1.23019e+07	6.04414e+06	3.41773e+06	8.10806e+06	0.608592	0.143143	0.249478	commonly detected	background
Wiskott-Aldrich syndrome protein homolog OS=Mus musculus GN=Was PE=1 SV=1	Was	P70315			7				11			3.04217e+07	27667364	7.47978e+07	3.50112e+07	9.61216e+07	5.02105e+07	5.70659e+07	5.73082e+07	1.55276	0.116222	0.216145	commonly detected	background
Tubulin gamma-1 chain OS=Mus musculus GN=Tubg1 PE=1 SV=1	Tubg1	P83887			4			1	7			1.04258e+07	1.48836e+07	1.30517e+07	1.4713e+07	2.16043e+07	1.96581e+07	1.8387e+07	1.14047e+07	1.33877	0.147286	0.253148	commonly detected	background
Eosinophil cationic protein 2 OS=Mus musculus GN=Ear2 PE=2 SV=1	Ear2	P97425			3				2			1.78122e+06	2111716	1.36811e+06	2.81343e+06	200017	480758	816674	256631	0.217238	0.00339363	0.0148163	commonly detected	background
Tubulin beta-5 chain OS=Mus musculus GN=Tubb5 PE=1 SV=1	Tubb5	P99024		1	7	2	1	4	9	6	1	3.6753e+07	2.33644e+07	3.31908e+07	3.00716e+07	2.07991e+07	3.73556e+07	1.19712e+07	1.44759e+07	0.685703	0.135652	0.241953	commonly detected	background
60S acidic ribosomal protein P2 OS=Mus musculus GN=Rplp2 PE=1 SV=3	Rplp2	P99027				1				1		124560	120470	132164	597559	239566	28575.8	100944	244066	0.629033	0.474012	0.592515	commonly detected	background
Heterogeneous nuclear ribonucleoprotein U-like protein 2 OS=Mus musculus GN=Hnrnpul2 PE=1 SV=2	Hnrnpul2	Q00PI9			2		1		2			2.65128e+06	6.31471e+06	1.70394e+06	2.68075e+06	657738	665594	212355	1.98892e+06	0.264002	0.03003	0.0789581	commonly detected	background
DNA topoisomerase 2-alpha OS=Mus musculus GN=Top2a PE=1 SV=2	Top2a	Q01320			5		1		4	1		1.84058e+07	1.03354e+07	1.07727e+07	1.69058e+07	8.94644e+06	2.6119e+06	2.72326e+06	1.83257e+06	0.285613	0.00916688	0.0297436	commonly detected	background
Transitional endoplasmic reticulum ATPase OS=Mus musculus GN=Vcp PE=1 SV=4	Vcp	Q01853				3			1	4		681404	2.06819e+06	1.1261e+06	672589	779750	446401	383973	282427	0.416103	0.0493575	0.111253	commonly detected	background
Complement C1q subcomponent subunit C OS=Mus musculus GN=C1qc PE=2 SV=2	C1qc	Q02105			2				1			234206	463927	379935	861899	31470.4	119293	60584.6	313532	0.270562	0.0323745	0.0822852	commonly detected	background
ATP synthase subunit alpha, mitochondrial OS=Mus musculus GN=Atp5a1 PE=1 SV=1	Atp5a1	Q03265			8	1		1	8	2		1.10661e+07	8.77302e+06	1.56805e+07	8.73574e+06	1.28715e+07	9.74482e+06	1.20123e+07	8.19578e+06	0.967665	0.917635	0.942352	commonly detected	background
Zinc finger CCCH domain-containing protein 15 OS=Mus musculus GN=Zc3h15 PE=1 SV=2	Zc3h15	Q3TIV5			1				1			1.45306e+06	1066911	1.2181e+06	437956	870683	481469	1.0967e+06	755638	0.767355	0.521226	0.638449	commonly detected	background
Pinin OS=Mus musculus GN=Pnn PE=1 SV=4	Pnn	Q3TUQ5				1			2	1		284330	53608.1	121416	84115.5	301229	474852	884020	263273	3.53906	0.0239469	0.0658002	commonly detected	background
Lamin-B receptor OS=Mus musculus GN=Lbr PE=1 SV=2	Lbr	Q3U9G9			1			2	2	1		471451	662141	700216	545216	1.00009e+06	804371	1.01839e+06	542902	1.41476	0.104427	0.197827	commonly detected	background
Replication factor C subunit 4 OS=Mus musculus GN=Rfc4 PE=1 SV=1	Rfc4	Q3UI84			1				1			137139	116485	609172	201721	122081	158772	87535.7	622847	0.93116	0.794857	0.856647	commonly detected	background
Probable ATP-dependent RNA helicase DDX17 OS=Mus musculus GN=Ddx17 PE=2 SV=1	Ddx17	Q501J6		1	8	3			11	3		6.38504e+06	10997495	1.97509e+06	1.34873e+07	7.88446e+06	9.30625e+06	1.13968e+07	2.08634e+07	1.50559	0.289422	0.414401	commonly detected	background
Thyroid hormone receptor-associated protein 3 OS=Mus musculus GN=Thrap3 PE=1 SV=1	Thrap3	Q569Z6				1				1		193589	609980	225795	165119	34625.1	33620.3	21807.2	11345	0.0848883	0.000862422	0.00626283	commonly detected	background
Nuclear fragile X mental retardation-interacting protein 2 OS=Mus musculus GN=Nufip2 PE=1 SV=1	Nufip2	Q5F2E7			1				1			608854	410359	170829	714349	401506	623319	501550	1.45257e+06	1.56425	0.3343	0.463462	commonly detected	background
Unconventional myosin-Ig OS=Mus musculus GN=Myo1g PE=2 SV=1	Myo1g	Q5SUA5		3	30	51		3	25	54		1.8035e+08	1.22727e+08	1.45677e+08	1.32665e+08	1.41382e+08	1.06247e+08	1.73302e+08	1.25809e+08	0.940354	0.631672	0.732548	commonly detected	background
Myosin light polypeptide 6 OS=Mus musculus GN=Myl6 PE=1 SV=3	Myl6	Q60605				4			1	6		2.19043e+06	1.677e+06	1.80568e+06	789148	1.89717e+06	2.13722e+06	7.24854e+06	7.59872e+06	2.92183	0.0763965	0.153895	commonly detected	background
KH domain-containing, RNA-binding, signal transduction-associated protein 1 OS=Mus musculus GN=Khdrbs1 PE=1 SV=2	Khdrbs1	Q60749			5	2	2		8	3	4	4.02744e+07	1.89046e+07	9.63217e+06	1.43052e+07	4.86999e+07	4.18308e+07	4.61165e+07	3.30886e+07	2.04215	0.0356176	0.0883201	commonly detected	background
Caprin-1 OS=Mus musculus GN=Caprin1 PE=1 SV=2	Caprin1	Q60865			5				5			7.43708e+06	4.56023e+06	1.23328e+07	5.75775e+06	4.93378e+06	3.06328e+06	4.66352e+06	4.56115e+06	0.572381	0.0804129	0.159259	commonly detected	background
Rho guanine nucleotide exchange factor 2 OS=Mus musculus GN=Arhgef2 PE=1 SV=4	Arhgef2	Q60875			10				21			4.00341e+07	19813881	2.35779e+07	2.79996e+07	4.48896e+07	2.62695e+07	2.69784e+07	3.6851e+07	1.21147	0.347927	0.476948	commonly detected	background
Histone-binding protein RBBP4 OS=Mus musculus GN=Rbbp4 PE=1 SV=5	Rbbp4	Q60972		1	2	1		2	3	1	1	1.13021e+07	4.38466e+06	5.31162e+06	5.40582e+06	1.74936e+07	1.00214e+07	3.04199e+06	4.39406e+06	1.3237	0.789786	0.854201	commonly detected	background
Peroxiredoxin-2 OS=Mus musculus GN=Prdx2 PE=1 SV=3	Prdx2	Q61171			2			1	1	1		1.38546e+06	2186092	624190	2.63529e+06	2.94123e+06	410003	256182	166154	0.552416	0.158755	0.263154	commonly detected	background
Host cell factor 1 OS=Mus musculus GN=Hcfc1 PE=1 SV=2	Hcfc1	Q61191			32		1	5	47		4	2.56058e+08	2.05975e+08	1.9665e+08	2.61749e+08	2.38373e+08	2.88594e+08	2.46612e+08	3.48223e+08	1.21878	0.137851	0.244446	commonly detected	background
Plastin-2 OS=Mus musculus GN=Lcp1 PE=1 SV=4	Lcp1	Q61233				3		1		1		274504	471468	250670	129001	157594	31520.4	84473.2	96236.2	0.328545	0.0354655	0.0883201	commonly detected	background
RNA-binding protein EWS OS=Mus musculus GN=Ewsr1 PE=1 SV=2	Ewsr1	Q61545			6				5			8.1685e+06	8.4446e+06	4.31853e+07	9.4468e+06	2.76487e+07	1.20539e+07	3.01447e+06	9.45801e+06	0.753484	0.671591	0.761469	commonly detected	background
Probable ATP-dependent RNA helicase DDX5 OS=Mus musculus GN=Ddx5 PE=1 SV=2	Ddx5	Q61656			17	2	2	3	17	3	3	3.6205e+07	3.1305e+07	4.72322e+07	2.89743e+07	1.19356e+07	1.9503e+07	2.37024e+07	2.47946e+07	0.556204	0.0224653	0.0622901	commonly detected	background
Myosin-10 OS=Mus musculus GN=Myh10 PE=1 SV=2	Myh10	Q61879				54			17	59		1.91459e+09	6.69366e+08	6.78663e+08	6.72467e+08	7.23107e+08	1.11438e+09	1.10964e+09	1.37576e+09	1.09855	0.550606	0.660059	commonly detected	background
Nucleophosmin OS=Mus musculus GN=Npm1 PE=1 SV=1	Npm1	Q61937			2	3			1	3		1.59922e+06	3.44028e+06	3.84791e+06	5.49404e+06	1.07512e+06	733480	1.38457e+06	3.15444e+06	0.441375	0.072035	0.148451	commonly detected	background
ATP-dependent RNA helicase DDX3X OS=Mus musculus GN=Ddx3x PE=1 SV=3	Ddx3x	Q62167			8	1		3	7			5.93854e+06	7.60082e+06	5.38528e+06	8.41461e+06	9.46801e+06	4.09165e+06	1.26479e+07	5.37767e+06	1.15531	0.82736	0.876197	commonly detected	background
Spectrin beta chain, non-erythrocytic 1 OS=Mus musculus GN=Sptbn1 PE=1 SV=2	Sptbn1	Q62261			25	111			36	111		2.73421e+08	2.33013e+08	2.39554e+08	2.74944e+08	4.49278e+08	4.76647e+08	4.36044e+08	4.80428e+08	1.80462	2.00754e-05	0.0005507	commonly detected	background
Transcription intermediary factor 1-beta OS=Mus musculus GN=Trim28 PE=1 SV=3	Trim28	Q62318			2	5			3	4		3.28666e+06	4.27927e+06	3.17672e+06	2.50999e+06	4.57841e+06	3.84823e+06	3.90017e+06	6.44041e+06	1.41611	0.0786228	0.156732	commonly detected	background
DNA topoisomerase 2-beta OS=Mus musculus GN=Top2b PE=1 SV=2	Top2b	Q64511			3				2	1		2.42552e+06	5084435	6.3984e+06	5.28021e+06	969950	1.34009e+06	1.24264e+06	1.57052e+06	0.266993	0.00165046	0.00929515	commonly detected	background
Constitutive coactivator of PPAR-gamma-like protein 1 OS=Mus musculus GN=FAM120A PE=1 SV=2	FAM120A	Q6A0A9					1		2			536982	226662	2.68649e+06	978955	120103	424676	355390	1.10569e+06	0.452883	0.354688	0.482945	commonly detected	background
Tropomyosin alpha-4 chain OS=Mus musculus GN=Tpm4 PE=2 SV=3	Tpm4	Q6IRU2				9			3	6		1.10022e+07	9.85947e+06	1.23004e+07	2.4991e+07	1.06065e+07	1.66376e+07	1.01369e+07	2.26718e+07	1.03267	0.869071	0.910882	commonly detected	background
Neurabin-2 OS=Mus musculus GN=Ppp1r9b PE=1 SV=1	Ppp1r9b	Q6R891			5	14			7	14		2.3703e+07	1.69335e+07	1.56607e+07	1.50323e+07	1.82924e+07	1.47649e+07	2.42785e+07	3.52112e+07	1.29746	0.338017	0.466494	commonly detected	background
MCG5400 OS=Mus musculus GN=Myl12a PE=2 SV=1	Myl12a	Q6ZWQ9			3	7			5	6		3.24372e+06	4.4055e+06	5.42154e+06	3.60469e+06	1.16919e+07	2.29578e+06	5.84917e+06	7.40317e+06	1.63354	0.361609	0.488012	commonly detected	background
Desmoglein-4 OS=Mus musculus GN=Dsg4 PE=1 SV=1	Dsg4	Q7TMD7		1				1				1.23754e+06	613549	2.76411e+06	370430	2.5463e+06	2.5741e+06	322972	2.35556e+06	1.56428	0.515263	0.633691	commonly detected	background
Integrator complex subunit 7 OS=Mus musculus GN=Ints7 PE=1 SV=1	Ints7	Q7TQK1			3				4			2.151e+06	1303453	2.19764e+06	2.48002e+06	2.10071e+06	2.10372e+06	2.54775e+06	2.03763e+06	1.08088	0.526876	0.640228	commonly detected	background
Ubiquitin carboxyl-terminal hydrolase 8 OS=Mus musculus GN=Usp8 PE=1 SV=2	Usp8	Q80U87			2				1			2.08267e+06	2.33507e+06	3.01048e+06	1.45763e+06	659440	464411	713627	745700	0.290707	0.00058861	0.00498683	commonly detected	background
Integrator complex subunit 2 OS=Mus musculus GN=Ints2 PE=2 SV=2	Ints2	Q80UK8			2				2			638149	512765	259894	801834	1.22e+06	484877	859087	600368	1.43012	0.281721	0.409167	commonly detected	background
Mannosyl-oligosaccharide glucosidase OS=Mus musculus GN=Mogs PE=2 SV=1	Mogs	Q80UM7			2				1			1.6614e+06	1.29168e+06	1.09122e+06	1.84457e+06	277437	332046	752702	116397	0.251081	0.00782912	0.0259552	commonly detected	background
Filamin-B OS=Mus musculus GN=Flnb PE=1 SV=3	Flnb	Q80X90				2				2		181401	1.57002e+06	532976	149610	727544	1.27917e+06	839764	666858	1.44344	0.21287	0.33295	commonly detected	background
Protein FAM76B OS=Mus musculus GN=Fam76b PE=2 SV=1	Fam76b	Q80XP8			2				4			498657	1048758	2.15011e+06	1.41812e+06	2.47855e+06	1.3335e+06	1.27018e+06	2.18349e+06	1.42029	0.260501	0.387574	commonly detected	background
Death-associated protein kinase 1 OS=Mus musculus GN=Dapk1 PE=1 SV=3	Dapk1	Q80YE7				2				1		1.40854e+06	1.3301e+06	810108	467917	1.19213e+06	102523	417175	1.23627e+06	0.733965	0.380352	0.502196	commonly detected	background
Elongation factor Tu, mitochondrial OS=Mus musculus GN=Tufm PE=1 SV=1	Tufm	Q8BFR5			1				1			131389	447507	387711	739355	225512	723093	1.02534e+06	7.76244e+06	5.70727	0.234226	0.35887	commonly detected	background
Beta-actin-like protein 2 OS=Mus musculus GN=Actbl2 PE=1 SV=1	Actbl2	Q8BFZ3			12	17		4	15	11		6.50751e+09	4.99135e+09	1.2044e+09	2.51052e+09	6.37972e+08	2.17976e+09	3.95623e+08	1.01191e+09	0.277726	0.0486579	0.111253	commonly detected	background
Heterogeneous nuclear ribonucleoprotein A3 OS=Mus musculus GN=Hnrnpa3 PE=1 SV=1	Hnrnpa3	Q8BG05			1				3	2		1.18713e+06	1.03879e+06	738741	571109	977661	1.29072e+06	1.01535e+06	1.4074e+06	1.32677	0.149943	0.25549	commonly detected	background
CDKN2A-interacting protein OS=Mus musculus GN=Cdkn2aip PE=2 SV=1	Cdkn2aip	Q8BI72			8				12			1.07355e+07	7.76845e+06	7.12374e+06	1.32464e+07	1.18639e+07	1.0144e+07	1.62703e+07	5.38107e+06	1.12309	0.79866	0.857715	commonly detected	background
Serine/arginine-rich splicing factor 7 OS=Mus musculus GN=Srsf7 PE=1 SV=1	Srsf7	Q8BL97				4			1	5		2.29305e+06	3.18102e+06	1.61265e+06	2.29078e+06	1.58838e+06	2.31136e+06	3.64688e+06	2.62246e+06	1.08441	0.774483	0.840631	commonly detected	background
Trifunctional enzyme subunit alpha, mitochondrial OS=Mus musculus GN=Hadha PE=1 SV=1	Hadha	Q8BMS1			5				6			6.40838e+06	2685992	1.4192e+06	5.68244e+06	4.73364e+06	3.31783e+06	3.38765e+06	8.20506e+06	1.2129	0.511216	0.631258	commonly detected	background
Filamin-A OS=Mus musculus GN=Flna PE=1 SV=5	Flna	Q8BTM8			13	55			29	74		9.95761e+07	1.38038e+08	1.20607e+08	1.60002e+08	2.12849e+08	2.10795e+08	2.48526e+08	2.68125e+08	1.81446	0.00205718	0.0110077	commonly detected	background
Phenylalanine--tRNA ligase alpha subunit OS=Mus musculus GN=Farsa PE=2 SV=1	Farsa	Q8C0C7			1				2			1.59005e+06	1.72735e+06	2.40432e+06	6.92964e+06	824411	1.13271e+06	2.12468e+06	1.58686e+06	0.448067	0.141993	0.248895	commonly detected	background
RNA-binding protein 14 OS=Mus musculus GN=Rbm14 PE=1 SV=1	Rbm14	Q8C2Q3			7	2			15			2.26137e+07	2.22665e+07	1.70816e+07	2.82189e+07	3.63437e+07	1.54405e+07	2.78118e+07	1.25216e+07	1.02148	0.847044	0.890856	commonly detected	background
Heterogeneous nuclear ribonucleoprotein H OS=Mus musculus GN=Hnrnph1 PE=1 SV=3	Hnrnph1	Q8C2Q7			4				3	1		3.47891e+06	3259721	2.60958e+06	2.5704e+06	1.93736e+06	2.25302e+06	2.19545e+06	2.26864e+06	0.726132	0.0104819	0.0326223	commonly detected	background
Structural maintenance of chromosomes protein 4 OS=Mus musculus GN=Smc4 PE=1 SV=1	Smc4	Q8CG47			3				3			1.90487e+06	1.7492e+06	529889	1.4453e+06	2.00122e+06	980411	676795	633849	0.762494	0.510041	0.631258	commonly detected	background
Structural maintenance of chromosomes protein 2 OS=Mus musculus GN=Smc2 PE=1 SV=2	Smc2	Q8CG48			6				4			5.50053e+06	5935051	4.98508e+06	7.36994e+06	4.72553e+06	2.36276e+06	4.19698e+06	1.62981e+06	0.542865	0.0397353	0.0954607	commonly detected	background
UDP-N-acetylglucosamine--peptide N-acetylglucosaminyltransferase 110 kDa subunit OS=Mus musculus GN=Ogt PE=1 SV=2	Ogt	Q8CGY8			6				17			8.35753e+06	8.73766e+06	2.44622e+07	1.38828e+07	1.51652e+07	1.81536e+07	1.4056e+07	2.2272e+07	1.25625	0.293478	0.414401	commonly detected	background
Sodium channel modifier 1 OS=Mus musculus GN=Scnm1 PE=1 SV=1	Scnm1	Q8K136			1				2			509651	327034	451363	672139	314920	669647	542067	430882	0.998638	0.977187	0.984353	commonly detected	background
Coiled-coil and C2 domain-containing protein 1A OS=Mus musculus GN=Cc2d1a PE=1 SV=2	Cc2d1a	Q8K1A6			2				5			2.3861e+06	2142312	2.50321e+06	4.78919e+06	5.13208e+06	2.01699e+06	1.71354e+06	2.98262e+06	1.00207	0.907855	0.935459	commonly detected	background
Succinate dehydrogenase [ubiquinone] flavoprotein subunit, mitochondrial OS=Mus musculus GN=Sdha PE=1 SV=1	Sdha	Q8K2B3			1				2			541923	271221	217324	447373	123339	109064	859086	71563.5	0.786994	0.274705	0.400885	commonly detected	background
Actin-binding LIM protein 1 OS=Mus musculus GN=Ablim1 PE=1 SV=1	Ablim1	Q8K4G5			3	2			2	7		2.17801e+06	2.81342e+06	3.33345e+06	5.59366e+06	1.242e+07	4.95499e+06	4.76207e+06	6.20777e+06	2.03648	0.0595075	0.127815	commonly detected	background
PDZ and LIM domain protein 2 OS=Mus musculus GN=Pdlim2 PE=1 SV=1	Pdlim2	Q8R1G6			1	1			2	1		142970	778207	60038.5	58960.7	638622	370933	533271	1.19934e+06	2.63625	0.0631495	0.133754	commonly detected	background
Mediator of RNA polymerase II transcription subunit 17 OS=Mus musculus GN=Med17 PE=1 SV=1	Med17	Q8VCD5			2				5			541900	1252665	3.33544e+06	1.35332e+06	1.50143e+06	1.4568e+06	7.31023e+06	1.42157e+06	1.80309	0.395859	0.519323	commonly detected	background
Myosin-9 OS=Mus musculus GN=Myh9 PE=1 SV=4	Myh9	Q8VDD5		16	128	358		44	143	351		6.06889e+09	4.02138e+09	6.6352e+09	5.94129e+09	6.73293e+09	5.67712e+09	8.9686e+09	8.53601e+09	1.31976	0.121009	0.221017	commonly detected	background
E3 ubiquitin-protein ligase UHRF1 OS=Mus musculus GN=Uhrf1 PE=1 SV=2	Uhrf1	Q8VDF2				5		1	1	7		1.19846e+06	2.05526e+06	1.03791e+06	1.17189e+06	3.51925e+06	1.53201e+06	3.41428e+06	2.53526e+06	2.0135	0.0313405	0.0814009	commonly detected	background
Sodium/potassium-transporting ATPase subunit alpha-1 OS=Mus musculus GN=Atp1a1 PE=1 SV=1	Atp1a1	Q8VDN2			1				1			302194	404084	640709	197666	155464	249444	61250.4	250441	0.463923	0.0964225	0.186132	commonly detected	background
Heterogeneous nuclear ribonucleoprotein U OS=Mus musculus GN=Hnrnpu PE=1 SV=1	Hnrnpu	Q8VEK3		9	40	8	16	12	30	8	8	3.55437e+08	4.62716e+08	2.74785e+08	5.76896e+08	1.7324e+08	2.043e+08	1.0825e+08	1.7546e+08	0.395997	0.0049717	0.0187206	commonly detected	background
Eukaryotic initiation factor 4A-III OS=Mus musculus GN=Eif4a3 PE=2 SV=3	Eif4a3	Q91VC3		1	3			4	4			7.2337e+06	4.91822e+06	7.96181e+06	7.5993e+06	4.16511e+06	5.31894e+06	6.23585e+06	4.21654e+06	0.719389	0.0681215	0.141341	commonly detected	background
NADH-ubiquinone oxidoreductase 75 kDa subunit, mitochondrial OS=Mus musculus GN=Ndufs1 PE=1 SV=2	Ndufs1	Q91VD9			2	1			2			1.80108e+06	602913	549153	949549	1.25535e+06	390368	1.10739e+06	399027	0.807684	0.585598	0.692276	commonly detected	background
RNA binding motif protein, X-linked-like-1 OS=Mus musculus GN=Rbmxl1 PE=1 SV=1	Rbmxl1	Q91VM5			16	4			20	3		6.55297e+07	9.87926e+07	1.13866e+08	8.18702e+07	1.03228e+08	8.64148e+07	1.29025e+08	6.5826e+07	1.06786	0.770071	0.838827	commonly detected	background
Pre-mRNA-processing factor 6 OS=Mus musculus GN=Prpf6 PE=2 SV=1	Prpf6	Q91YR7			2		1		4			921974	1.46108e+06	1.03748e+06	1.00198e+07	1.61432e+06	909741	2.00838e+06	1.51627e+06	0.450042	0.641079	0.737846	commonly detected	background
SLIT-ROBO Rho GTPase-activating protein 2 OS=Mus musculus GN=Srgap2 PE=1 SV=2	Srgap2	Q91Z67				2			2	1		203140	157662	171388	252049	857871	229904	332415	390668	2.30907	0.048882	0.111253	commonly detected	background
Isoform 2 of Splicing factor 3B subunit 3 OS=Mus musculus GN=Sf3b3	Sf3b3	Q921M3					2				3	4.35021e+07	1.36411e+07	1.25909e+07	7.97132e+06	1.83756e+06	5.42765e+06	3.62304e+06	2.99049e+06	0.178607	0.00999114	0.0314154	commonly detected	background
Pyrroline-5-carboxylate reductase 2 OS=Mus musculus GN=Pycr2 PE=2 SV=1	Pycr2	Q922Q4			3				1			652757	728151	584670	699265	56264.2	170907	97162.5	307645	0.237154	0.0044745	0.0177237	commonly detected	background
Kinesin-like protein KIF2C OS=Mus musculus GN=Kif2c PE=1 SV=1	Kif2c	Q922S8			2				3			506099	677853	573512	3.1926e+06	667114	571111	478171	808679	0.51011	0.445602	0.563936	commonly detected	background
Unconventional myosin-Va OS=Mus musculus GN=Myo5a PE=1 SV=2	Myo5a	Q99104			1	7			4	8		4.96883e+06	5.41448e+06	4.24837e+06	3.46412e+06	9.13487e+06	5.17586e+06	7.99986e+06	3.94471e+06	1.4509	0.178135	0.288995	commonly detected	background
Trifunctional enzyme subunit beta, mitochondrial OS=Mus musculus GN=Hadhb PE=1 SV=1	Hadhb	Q99JY0			4				5			1.06043e+07	4.07888e+06	8.17202e+06	8.13596e+06	4.61814e+06	3.36096e+06	1.00504e+07	5.69108e+06	0.765401	0.37726	0.502196	commonly detected	background
Actin-related protein 3 OS=Mus musculus GN=Actr3 PE=1 SV=3	Actr3	Q99JY9		1	13	16		2	12	13		1.11032e+08	4.59341e+07	3.90962e+07	7.61057e+07	3.60063e+07	2.26255e+07	4.04247e+07	2.8233e+07	0.467687	0.0422734	0.0991798	commonly detected	background
N-acylneuraminate cytidylyltransferase OS=Mus musculus GN=Cmas PE=1 SV=2	Cmas	Q99KK2			1				1	1		2.44068e+07	3.45067e+07	1.11511e+07	7.1542e+07	5.60095e+06	1.82962e+06	2.21514e+06	4.43965e+06	0.0994683	0.00340046	0.0148163	commonly detected	background
Splicing factor 3B subunit 1 OS=Mus musculus GN=Sf3b1 PE=1 SV=1	Sf3b1	Q99NB9			3		4		1			3.29927e+06	3.06007e+06	3.7126e+06	4.4346e+06	103468	88581.2	398770	47004.2	0.043968	0.000281664	0.00306813	commonly detected	background
Pre-mRNA-processing-splicing factor 8 OS=Mus musculus GN=Prpf8 PE=1 SV=2	Prpf8	Q99PV0		1	1				2			511940	224253	136884	2.6682e+06	559047	384765	635968	209281	0.505203	0.895627	0.929836	commonly detected	background
Actin-related protein 2/3 complex subunit 5 OS=Mus musculus GN=Arpc5 PE=2 SV=3	Arpc5	Q9CPW4				1			1	2		3.07855e+07	7.52343e+06	6.41058e+06	3.66051e+06	4.38722e+06	2.32782e+07	9.59701e+06	5.35876e+06	0.880966	0.988851	0.992104	commonly detected	background
60S ribosomal protein L14 OS=Mus musculus GN=Rpl14 PE=2 SV=3	Rpl14	Q9CR57			3	2		3	4	2	1	2.53006e+06	2.41489e+06	3.29513e+06	4.659e+06	1.30827e+07	3.59716e+06	8.84873e+06	7.64665e+06	2.5719	0.0293342	0.0777993	commonly detected	background
Actin-related protein 2/3 complex subunit 2 OS=Mus musculus GN=Arpc2 PE=1 SV=3	Arpc2	Q9CVB6			6	25			7	18		1.33801e+08	3.89628e+07	1.00603e+08	9.58745e+07	1.9324e+07	3.66404e+07	5.403e+07	4.38449e+07	0.416635	0.0499729	0.111253	commonly detected	background
60S ribosomal protein L11 OS=Mus musculus GN=Rpl11 PE=1 SV=4	Rpl11	Q9CXW4			2	1			4	2		2.21756e+06	2.92124e+06	818721	1.5015e+06	3.69751e+06	4.03552e+06	2.66103e+06	6.22549e+06	2.22812	0.0390896	0.0953786	commonly detected	background
Interleukin enhancer-binding factor 2 OS=Mus musculus GN=Ilf2 PE=1 SV=1	Ilf2	Q9CXY6			2				2			2.39914e+06	1918302	4.85596e+06	1.85625e+06	1.36958e+06	655299	2.03879e+06	2.75291e+06	0.618024	0.217553	0.338539	commonly detected	background
Mitochondrial import receptor subunit TOM34 OS=Mus musculus GN=Tomm34 PE=2 SV=1	Tomm34	Q9CYG7			5				7			9.64681e+06	5200344	7.04138e+06	3.21251e+06	5.20319e+06	3.64822e+06	3.90041e+06	4.56691e+06	0.689961	0.266836	0.393164	commonly detected	background
60S ribosomal protein L15 OS=Mus musculus GN=Rpl15 PE=2 SV=4	Rpl15	Q9CZM2			3	1				1		1.8647e+06	1092457	1.57337e+06	873254	80848.6	8150.97	88550.1	38323.7	0.0399486	0.000905576	0.00627729	commonly detected	background
Protein LSM12 homolog OS=Mus musculus GN=Lsm12 PE=1 SV=1	Lsm12	Q9D0R8			1				2			948082	438807	172772	639261	2.49272e+06	1.44575e+06	2.08054e+06	1.05814e+06	3.21847	0.0202944	0.0573129	commonly detected	background
Integrator complex subunit 12 OS=Mus musculus GN=Ints12 PE=1 SV=1	Ints12	Q9D168			1				2			2.9938e+06	703402	1.59229e+06	3.09113e+06	3.80156e+06	2.16288e+06	2.57e+06	1.83616e+06	1.23745	0.419668	0.541916	commonly detected	background
Nucleolar protein 56 OS=Mus musculus GN=Nop56 PE=1 SV=2	Nop56	Q9D6Z1				3		1				623519	534168	396845	431650	717708	433443	1.02852e+06	441925	1.31991	0.365856	0.491568	commonly detected	background
Splicing factor U2AF 35 kDa subunit OS=Mus musculus GN=U2af1 PE=1 SV=4	U2af1	Q9D883			2				2			1.15421e+06	547693	1.9916e+06	323265	856295	426515	561460	675998	0.627436	0.551852	0.660059	commonly detected	background
Actin-related protein 2/3 complex subunit 5-like protein OS=Mus musculus GN=Arpc5l PE=1 SV=1	Arpc5l	Q9D898			2	2			1	1		2.42775e+06	626028	845029	875526	139540	223997	94435.3	233754	0.144884	0.00230792	0.0115663	commonly detected	background
60S ribosomal protein L4 OS=Mus musculus GN=Rpl4 PE=1 SV=3	Rpl4	Q9D8E6				6				6		7.57596e+07	5.49566e+06	7.28479e+06	3.89881e+06	1.64733e+06	2.25288e+06	2.61611e+06	4.7896e+06	0.122307	0.0988637	0.189644	commonly detected	background
5'-3' exoribonuclease 2 OS=Mus musculus GN=Xrn2 PE=1 SV=1	Xrn2	Q9DBR1			12				18			5.14274e+07	2.37468e+07	1.41348e+07	3.26576e+07	3.00172e+07	1.96956e+07	2.58068e+07	4.92373e+07	1.02288	0.836411	0.882717	commonly detected	background
Protein phosphatase 1 regulatory subunit 12A OS=Mus musculus GN=Ppp1r12a PE=1 SV=2	Ppp1r12a	Q9DBR7			6	24			8	20		2.11399e+07	1.83356e+07	2.37398e+07	2.43643e+07	1.72024e+07	1.93489e+07	2.08327e+07	2.32324e+07	0.920494	0.396729	0.519323	commonly detected	background
Casein kinase I isoform delta OS=Mus musculus GN=Csnk1d PE=1 SV=2	Csnk1d	Q9DC28			5				4			7.62022e+06	6.2968e+06	7.01933e+06	5.44263e+06	3.64506e+06	3.02831e+06	2.41044e+06	2.78551e+06	0.449954	0.000390953	0.00380657	commonly detected	background
Acidic leucine-rich nuclear phosphoprotein 32 family member B OS=Mus musculus GN=Anp32b PE=1 SV=1	Anp32b	Q9EST5			2				1	3		1.74198e+06	2.13257e+06	866835	3.32896e+06	442767	354680	345874	1.34769e+06	0.308663	0.0266266	0.0718681	commonly detected	background
General transcription factor II-I OS=Mus musculus GN=Gtf2i PE=1 SV=3	Gtf2i	Q9ESZ8			3				8	1		7.81006e+06	3.51205e+06	2.52027e+06	719680	2.93114e+07	5.80681e+06	6.66333e+06	4.4176e+06	3.17257	0.127781	0.23061	commonly detected	background
Tropomodulin-3 OS=Mus musculus GN=Tmod3 PE=1 SV=1	Tmod3	Q9JHJ0			3	8			2	8		1.47875e+07	1.06701e+07	1.22451e+07	1.12825e+07	1.25442e+07	4.54148e+06	1.05847e+07	4.25605e+06	0.651756	0.114225	0.213734	commonly detected	background
Nucleolar RNA helicase 2 OS=Mus musculus GN=Ddx21 PE=1 SV=3	Ddx21	Q9JIK5			2	5	1	2	2	3		956970	1.07895e+06	732647	1.4198e+06	767222	768539	678269	457816	0.637921	0.0529922	0.115447	commonly detected	background
Protein flightless-1 homolog OS=Mus musculus GN=Flii PE=1 SV=1	Flii	Q9JJ28				5				6		483726	982738	613265	2.52701e+06	334720	315348	441141	550131	0.356291	0.0733835	0.149213	commonly detected	background
Ras GTPase-activating-like protein IQGAP1 OS=Mus musculus GN=Iqgap1 PE=1 SV=2	Iqgap1	Q9JKF1			1	6			3	7		2.70381e+06	3.5621e+06	2.0587e+06	4.82119e+06	1.10602e+07	4.53049e+06	4.02291e+06	6.50191e+06	1.9866	0.0658342	0.138479	commonly detected	background
Endothelial differentiation-related factor 1 OS=Mus musculus GN=Edf1 PE=1 SV=1	Edf1	Q9JMG1			6				5			2.63977e+07	3.42925e+07	3.74958e+07	4.06512e+07	1.10037e+07	1.35087e+07	1.82587e+07	3.85305e+07	0.585589	0.0678473	0.141341	commonly detected	background
Unconventional myosin-XVIIIa OS=Mus musculus GN=Myo18a PE=1 SV=2	Myo18a	Q9JMH9			2	15			6	27		1.13468e+07	1.41743e+07	1.334e+07	2.01537e+07	2.60861e+07	2.56708e+07	2.65899e+07	3.17599e+07	1.86575	0.00267101	0.0125332	commonly detected	background
Gamma-adducin OS=Mus musculus GN=Add3 PE=1 SV=2	Add3	Q9QYB5				9				3		8.86182e+06	5.27191e+06	6.10576e+06	5.70557e+06	7.29933e+06	6.45168e+06	2.24499e+06	1.72666e+06	0.683084	0.203138	0.321021	commonly detected	background
Alpha-adducin OS=Mus musculus GN=Add1 PE=1 SV=2	Add1	Q9QYC0				7				8		9.94042e+06	5.188e+06	5.21448e+06	4.31206e+06	1.30108e+07	1.65089e+07	1.07577e+07	6.00958e+07	4.07112	0.0317597	0.0814009	commonly detected	background
Core histone macro-H2A.1 OS=Mus musculus GN=H2afy PE=1 SV=3	H2afy	Q9QZQ8				4				1		882002	2.72665e+06	1.54999e+06	3.50732e+06	363634	205507	307325	255480	0.13062	0.00113388	0.00754736	commonly detected	background
Actin-related protein 2/3 complex subunit 1A OS=Mus musculus GN=Arpc1a PE=1 SV=1	Arpc1a	Q9R0Q6				8			1	9		1.12778e+07	8.09453e+06	6.4599e+06	8.29863e+06	9.16559e+06	1.05503e+07	9.50242e+06	9.4399e+06	1.13265	0.272701	0.399875	commonly detected	background
Septin-6 OS=Mus musculus GN=Sept6 PE=1 SV=4	Sept6	Q9R1T4			2				1			1.29155e+06	1970301	1.07102e+06	1.3192e+06	148451	136028	72066.5	118318	0.084016	1.97103e-05	0.0005507	commonly detected	background
Unconventional myosin-Ic OS=Mus musculus GN=Myo1c PE=1 SV=2	Myo1c	Q9WTI7			13	36			10	32		3.49824e+07	3.95236e+07	5.04363e+07	4.28666e+07	5.83608e+07	1.25354e+07	2.11298e+07	8.56794e+07	1.05897	0.667525	0.761469	commonly detected	background
RuvB-like 2 OS=Mus musculus GN=Ruvbl2 PE=2 SV=3	Ruvbl2	Q9WTM5			15			1	18			4.19646e+07	4.02159e+07	3.49074e+07	4.74602e+07	4.84751e+07	4.55396e+07	5.3983e+07	5.41724e+07	1.22864	0.0336922	0.0849265	commonly detected	background
Coronin-1C OS=Mus musculus GN=Coro1c PE=1 SV=2	Coro1c	Q9WUM4			1	4			3	3		4.02271e+06	2.39128e+06	1.64523e+06	1.06981e+06	1.49272e+07	5.06817e+06	7.23225e+06	4.50864e+06	3.47641	0.0186751	0.0537349	commonly detected	background
RNA-binding motif protein, X chromosome OS=Mus musculus GN=Rbmx PE=1 SV=1	Rbmx	Q9WV02			14				19			6.42574e+07	49433200	1.08147e+08	7.67552e+07	8.71269e+07	6.20707e+07	1.90114e+08	6.98093e+07	1.37016	0.436903	0.557554	commonly detected	background
Actin-related protein 2/3 complex subunit 1B OS=Mus musculus GN=Arpc1b PE=1 SV=4	Arpc1b	Q9WV32			1	21			3	18		3.26686e+07	6.17259e+07	2.75327e+07	5.1961e+07	3.13753e+07	1.87128e+07	4.04942e+07	2.46182e+07	0.662498	0.164396	0.271031	commonly detected	background
Heterogeneous nuclear ribonucleoproteins C1/C2 OS=Mus musculus GN=Hnrnpc PE=1 SV=1	Hnrnpc	Q9Z204			3	1			6	3	2	7.18396e+06	6.90035e+06	2.63293e+07	1.01852e+07	6.62675e+06	4.00603e+06	3.85239e+06	1.04753e+07	0.493302	0.158529	0.263154	commonly detected	background
Actin-like protein 6A OS=Mus musculus GN=Actl6a PE=1 SV=2	Actl6a	Q9Z2N8			5				7			7.42776e+06	3.9981e+06	6.04448e+06	2.41798e+06	1.3132e+07	4.91467e+06	5.37753e+06	5.28391e+06	1.44347	0.330333	0.460053	commonly detected	background
Heterogeneous nuclear ribonucleoprotein F OS=Mus musculus GN=Hnrnpf PE=1 SV=3	Hnrnpf	Q9Z2X1			7	2			4	1		4.97588e+06	7.78463e+06	3.96197e+06	9.09097e+06	1.77665e+07	4.26403e+06	5.25227e+06	8.07338e+06	1.36968	0.593345	0.698726	commonly detected	background
Heterogeneous nuclear ribonucleoprotein M OS=Mus musculus GN=Hnrnpm	Hnrnpm	Q9D0E1		2				3				4.49947e+06	5.04326e+06	2.29045e+06	6.76743e+06	9.90717e+06	2.3645e+07	3.66998e+06	2.15746e+07	3.16101	0.0890733	0.173041	commonly detected	background
Proteasome subunit alpha type-5 OS=Mus musculus GN=Psma5 PE=1 SV=1	Psma5	D3YX79			1							111473	234656	199952	302786								unique in igg	background
40S ribosomal protein S7 OS=Mus musculus GN=Rps7 PE=2 SV=1	Rps7	F6SVV1			2							727007	659141	437425	377123								unique in igg	background
Lysozyme C-1 OS=Mus musculus GN=Lyz1 PE=1 SV=1	Lyz1	P17897			3							5.78439e+07	3.7205e+07	4.21333e+07	5.32749e+07								unique in igg	background
Isoform UBF2 of Nucleolar transcription factor 1 OS=Mus musculus GN=Ubtf	Ubtf	P25976		1								4.26982e+06	4.38615e+06	4.33972e+06	2.78578e+06								unique in igg	background
Lupus La protein homolog OS=Mus musculus GN=Ssb PE=2 SV=1	Ssb	P32067			3							514529	906769	1.75237e+06	686806								unique in igg	background
T-complex protein 1 subunit theta OS=Mus musculus GN=Cct8 PE=1 SV=3	Cct8	P42932			1		1					4.0655e+06	893446	1.74492e+06	835921								unique in igg	background
Probable ATP-dependent RNA helicase DDX6 OS=Mus musculus GN=Ddx6 PE=2 SV=1	Ddx6	P54823			1							829751	830649	442404	473158								unique in igg	background
T-complex protein 1 subunit zeta OS=Mus musculus GN=Cct6a PE=1 SV=3	Cct6a	P80317			2							438628	411838	418959	566760								unique in igg	background
Adseverin OS=Mus musculus GN=Scin PE=1 SV=3	Scin	Q60604				1						33184.9	421851	124996	94529.4								unique in igg	background
Proteasome subunit beta type-6 OS=Mus musculus GN=Psmb6 PE=1 SV=3	Psmb6	Q60692			2							103873	136345	244354	609614								unique in igg	background
DNA replication licensing factor MCM7 OS=Mus musculus GN=Mcm7 PE=2 SV=1	Mcm7	Q61881			2							860669	866576	753467	1.75824e+06								unique in igg	background
U1 small nuclear ribonucleoprotein 70 kDa OS=Mus musculus GN=Snrnp70 PE=1 SV=2	Snrnp70	Q62376				2						186720	139364	164245	273639								unique in igg	background
60S ribosomal protein L35 OS=Mus musculus GN=Rpl35 PE=2 SV=1	Rpl35	Q6ZWV7			1							56649.9	167794	184025	172066								unique in igg	background
Calcium-binding mitochondrial carrier protein Aralar1 OS=Mus musculus GN=Slc25a12 PE=1 SV=1	Slc25a12	Q8BH59			2							1.18877e+06	688820	1.37067e+06	1.31528e+06								unique in igg	background
Leucine--tRNA ligase, cytoplasmic OS=Mus musculus GN=Lars PE=2 SV=2	Lars	Q8BMJ2			1							523135	216709	108058	167486								unique in igg	background
Enhancer of polycomb homolog 1 OS=Mus musculus GN=Epc1 PE=2 SV=1	Epc1	Q8C9X6			1							251186	239849	208925	49324								unique in igg	background
Bifunctional glutamate/proline--tRNA ligase OS=Mus musculus GN=Eprs PE=1 SV=4	Eprs	Q8CGC7			3							1.12118e+06	1697562	3.57008e+06	2.49358e+06								unique in igg	background
Matrin-3 OS=Mus musculus GN=Matr3 PE=1 SV=1	Matr3	Q8K310			2							946399	986310	851325	657882								unique in igg	background
ATP-dependent RNA helicase DDX39A OS=Mus musculus GN=Ddx39a PE=2 SV=1	Ddx39a	Q8VDW0			2							2.73329e+06	916927	954353	941329								unique in igg	background
ATP-dependent RNA helicase DDX1 OS=Mus musculus GN=Ddx1 PE=1 SV=1	Ddx1	Q91VR5			1		1					3.17144e+06	4.28296e+06	2.00105e+06	1.46836e+06								unique in igg	background
Src substrate cortactin OS=Mus musculus GN=Cttn PE=1 SV=2	Cttn	Q921L6				2						292021	45268.9	104054	50673.4								unique in igg	background
Structural maintenance of chromosomes protein 6 OS=Mus musculus GN=Smc6 PE=2 SV=1	Smc6	Q924W5			5							1.48821e+07	2.8016e+06	3.49953e+06	2.8274e+06								unique in igg	background
Isoform 2 of Mediator of RNA polymerase II transcription subunit 24 OS=Mus musculus GN=Med24	Med24	Q99K74					1					395866	24498.7	369434	243122								unique in igg	background
B-cell lymphoma/leukemia 11B OS=Mus musculus GN=Bcl11b PE=1 SV=1	Bcl11b	Q99PV8			1							229794	847420	1.96598e+06	218273								unique in igg	background
39S ribosomal protein L11, mitochondrial OS=Mus musculus GN=Mrpl11 PE=2 SV=1	Mrpl11	Q9CQF0			1							2.11903e+08	1.91221e+08	2.47147e+08	1.41509e+08								unique in igg	background
SAP domain-containing ribonucleoprotein OS=Mus musculus GN=Sarnp PE=1 SV=3	Sarnp	Q9D1J3			2							362468	302144	497239	339570								unique in igg	background
Cleavage and polyadenylation specificity factor subunit 3 OS=Mus musculus GN=Cpsf3 PE=1 SV=2	Cpsf3	Q9QXK7					1					2.04775e+06	3.04213e+06	2.05044e+06	2.10513e+06								unique in igg	background
Phenylalanine--tRNA ligase beta subunit OS=Mus musculus GN=Farsb PE=2 SV=2	Farsb	Q9WUA2			2							1.16839e+06	1210373	7.38681e+06	973204								unique in igg	background

## Sheet: Peptides and pre-processing
		Raw peptide intensity								Normalized peptide intensity								Peptide intensities after missing value imputation
Protein name	Peptide sequence	IgG_bio1	IgG_bio2	IgG_bio3	IgG_bio4	Satb1_bio1	Satb1_bio2	Satb1_bio3	Satb1_bio4	IgG_bio1	IgG_bio2	IgG_bio3	IgG_bio4	Satb1_bio1	Satb1_bio2	Satb1_bio3	Satb1_bio4	IgG_bio1	IgG_bio2	IgG_bio3	IgG_bio4	Satb1_bio1	Satb1_bio2	Satb1_bio3	Satb1_bio4
116 kDa U5 small nuclear ribonucleoprotein component OS=Mus musculus GN=Eftud2 PE=2 SV=1	AFIPAIDSFGFETDLR		386138								386139							1.54767e+06	386139	245863	154338
116 kDa U5 small nuclear ribonucleoprotein component OS=Mus musculus GN=Eftud2 PE=2 SV=1	FKILDAVVAQEPLHR		323364								323365							677517	323365	1.43662e+06	168711
116 kDa U5 small nuclear ribonucleoprotein component OS=Mus musculus GN=Eftud2 PE=2 SV=1	IAVEPVNPSELPK						785545	220753							368728	44959.3						516057	368728	44959.3	51462.6
116 kDa U5 small nuclear ribonucleoprotein component OS=Mus musculus GN=Eftud2 PE=2 SV=1	ILAQVVGDVDTSLPR		279689								279690							367367	279690	975868	48081.8
116 kDa U5 small nuclear ribonucleoprotein component OS=Mus musculus GN=Eftud2 PE=2 SV=1	ILDAVVAQEPLHR		2294790	545848	979564		1456330	472588			2.29479e+06	131473	3.89851e+06		683589	96248.7		801338	2.29479e+06	131473	3.89851e+06	537431	683589	96248.7	133828
116 kDa U5 small nuclear ribonucleoprotein component OS=Mus musculus GN=Eftud2 PE=2 SV=1	ITMIAEPLEK		346626				202267				346627				94942.8			299130	346627	359362	570421	124705	94942.8	331266	16321.7
116 kDa U5 small nuclear ribonucleoprotein component OS=Mus musculus GN=Eftud2 PE=2 SV=1	LIKHAVQER		551707				224769				551708				105505			215365	551708	1.19225e+06	847673	80093.4	105505	278044	41210.6
116 kDa U5 small nuclear ribonucleoprotein component OS=Mus musculus GN=Eftud2 PE=2 SV=1	RVVYSAFLMATPR		324175								324176							700110	324176	291854	145692
116 kDa U5 small nuclear ribonucleoprotein component OS=Mus musculus GN=Eftud2 PE=2 SV=1	SFVEFILEPLYK		100062				59626				100063				27988.4			79586.1	100063	55403.7	71286	24153.2	27988.4	29016.6	46058.6
116 kDa U5 small nuclear ribonucleoprotein component OS=Mus musculus GN=Eftud2 PE=2 SV=1	SIVIRPLEPQPAPHLAR						416233								195377							76267.2	195377	422212	300187
14-3-3 protein epsilon OS=Mus musculus GN=Ywhae PE=1 SV=1	EAAENSLVAYK	388856	467415			379565		1343230		2.02009e+06	467416			1.04757e+06		273566		2.02009e+06	467416	547494	961249	1.04757e+06	298424	273566	240591
14-3-3 protein epsilon OS=Mus musculus GN=Ywhae PE=1 SV=1	LAEQAER					152394								420599								420599	661804	232881	299639
14-3-3 protein epsilon OS=Mus musculus GN=Ywhae PE=1 SV=1	MDDREDLVYQAK		193810								193811							74584.4	193811	800708	365439
14-3-3 protein sigma OS=Mus musculus GN=Sfn PE=1 SV=2	SAYQEAMDISK					48796.5								134678								134678	65398.3	75881.9	133228
14-3-3 protein sigma OS=Mus musculus GN=Sfn PE=1 SV=2	YLAEVATGDDK					427285								1.17928e+06								1.17928e+06	1.44088e+06	4.87205e+06	2.22358e+06
14-3-3 protein zeta/delta OS=Mus musculus GN=Ywhaz PE=1 SV=1	SVTEQGAELSNEER		767921					339685			767922					69181.3		651794	767922	405492	3.26237e+06	58719.5	32397.6	69181.3	293904
14-3-3 protein zeta/delta OS=Mus musculus GN=Ywhaz PE=1 SV=1	YLAEVAAGDDKK	211042	1716490					131509		1.09635e+06	1716491					26783.7		1.09635e+06	1716491	1.61496e+06	8.25814e+06	27972.4	15539.1	26783.7	161234
39S ribosomal protein L11, mitochondrial OS=Mus musculus GN=Mrpl11 PE=2 SV=1	DIKEGIPLPTK		191221000								1.91221e+08							2.11903e+08	1.91221e+08	2.47147e+08	1.41509e+08
40S ribosomal protein S11 OS=Mus musculus GN=Rps11 PE=2 SV=3	ADIQTER		13147300	1893060			21442500				1.31473e+07	455961			1.00649e+07			922137	1.31473e+07	455961	4.0423e+06	1.11535e+07	1.00649e+07	1.30086e+07	7.44835e+06
40S ribosomal protein S11 OS=Mus musculus GN=Rps11 PE=2 SV=3	AYQKQPTIFQNK		2217020								2217021							4.54139e+06	2217021	2.82993e+06	4.72413e+06
40S ribosomal protein S11 OS=Mus musculus GN=Rps11 PE=2 SV=3	CPFTGNVSIR		7594310						283440		7.59431e+06						529630	3.98535e+06	7.59431e+06	1.17728e+07	5.88627e+06	199474	392918	443031	529630
40S ribosomal protein S11 OS=Mus musculus GN=Rps11 PE=2 SV=3	DVQIGDIVTVGECRPLSK		1642790								1642791							2.4941e+06	1642791	4.32143e+06	6.02168e+06
40S ribosomal protein S11 OS=Mus musculus GN=Rps11 PE=2 SV=3	DYLHYIR						1166390								547494							1.1215e+06	547494	698852	1.16663e+06
40S ribosomal protein S11 OS=Mus musculus GN=Rps11 PE=2 SV=3	EAIEGTYIDKK						6949300								3.26194e+06							1.7118e+06	3.26194e+06	5.05672e+06	2.5283e+06
40S ribosomal protein S11 OS=Mus musculus GN=Rps11 PE=2 SV=3	FNVLK		665861				2184500				665862				1.02539e+06			4.31161e+06	665862	193798	432647	1.55675e+06	1.02539e+06	2.69732e+06	3.75857e+06
40S ribosomal protein S11 OS=Mus musculus GN=Rps11 PE=2 SV=3	GRILSGVVTK		701749								701750							804611	701750	919056	124615
40S ribosomal protein S11 OS=Mus musculus GN=Rps11 PE=2 SV=3	ILSGVVTKMK						388823								182511							1.1818e+06	182511	53119.4	118587
40S ribosomal protein S11 OS=Mus musculus GN=Rps11 PE=2 SV=3	NMSVHLSPCFR		236881				531883				236882				249662			182336	236882	288363	454339	286257	249662	326973	44334.2
40S ribosomal protein S13 OS=Mus musculus GN=Rps13 PE=1 SV=2	DSHGVAQVR		8576310								8.57631e+06							7.09211e+06	8.57631e+06	1.00589e+07	1.2176e+07
40S ribosomal protein S13 OS=Mus musculus GN=Rps13 PE=1 SV=2	FVTGNKILR		738598				180235				738599				84601.2			875014	738599	416359	1.01989e+06	65120.5	84601.2	102988	162265
40S ribosomal protein S13 OS=Mus musculus GN=Rps13 PE=1 SV=2	GLTPSQIGVILR		1950390				1427040				1950391				669841			2.16441e+06	1950391	5.4343e+06	2.28481e+06	553919	669841	785634	950992
40S ribosomal protein S13 OS=Mus musculus GN=Rps13 PE=1 SV=2	YESSTASALVA						577661								271150							321229	271150	152851	374417
40S ribosomal protein S18 OS=Mus musculus GN=Rps18 PE=1 SV=3	AGELTEDEVER		1462090				5860790				1.46209e+06				2.751e+06			1.0609e+06	1.46209e+06	2.09976e+06	1.562e+06	3.05288e+06	2.751e+06	7.66502e+06	3.22269e+06
40S ribosomal protein S18 OS=Mus musculus GN=Rps18 PE=1 SV=3	RAGELTEDEVER						850819								399368							289782	399368	573546	426658
40S ribosomal protein S18 OS=Mus musculus GN=Rps18 PE=1 SV=3	VITIMQNPR						1202210								564307							420612	564307	332185	1.02474e+06
40S ribosomal protein S18 OS=Mus musculus GN=Rps18 PE=1 SV=3	VLNTNIDGR		172431								172432							128524	172432	101504	313125
40S ribosomal protein S2 OS=Mus musculus GN=Rps2 PE=1 SV=3	AEDKEWIPVTK			4138580				12076500				996816				2.45953e+06		680216	2.8388e+06	996816	1.65555e+06	1.67836e+06	7.00443e+06	2.45953e+06	4.08489e+06
40S ribosomal protein S2 OS=Mus musculus GN=Rps2 PE=1 SV=3	AEDKEWIPVTKLGR			569681								137213						53824.5	158587	137213	60728.9
40S ribosomal protein S2 OS=Mus musculus GN=Rps2 PE=1 SV=3	CGSVLVR						2203390								1.03425e+06							405705	1.03425e+06	1.94765e+06	457748
40S ribosomal protein S2 OS=Mus musculus GN=Rps2 PE=1 SV=3	EVATAIRGAIILAK							207376								42234.9						33639.9	43428.8	42234.9	55291
40S ribosomal protein S2 OS=Mus musculus GN=Rps2 PE=1 SV=3	GCTATLGNFAK			3.59372e+06			377784	8270499				865582			177329	1.68439e+06		689432	890050	865582	1.13316e+06	1.12641e+06	177329	1.68439e+06	178037
40S ribosomal protein S2 OS=Mus musculus GN=Rps2 PE=1 SV=3	GTGIVSAPVPK			9018019				17330193				2.17207e+06				3.52951e+06		4.4767e+06	1.04192e+06	2.17207e+06	707576	3.41469e+06	887079	3.52951e+06	5.00602e+06
40S ribosomal protein S2 OS=Mus musculus GN=Rps2 PE=1 SV=3	LSIVPVRR							6843590								1.39378e+06						1.36476e+06	718565	1.39378e+06	7.48784e+06
40S ribosomal protein S2 OS=Mus musculus GN=Rps2 PE=1 SV=3	SPYQEFTDHLVK							2338620								476290						97322.6	1.36999e+06	476290	635823
40S ribosomal protein S2 OS=Mus musculus GN=Rps2 PE=1 SV=3	TYSYLTPDLWK			854746			211891					205874			99460.3			199176	51742.6	205874	291998	35686	99460.3	85210.8	59358.5
40S ribosomal protein S2 OS=Mus musculus GN=Rps2 PE=1 SV=3	VSVQRTQAPAVATT						1386240								650689							227401	650689	1.28131e+06	381881
40S ribosomal protein S23 OS=Mus musculus GN=Rps23 PE=2 SV=3	GIVLEKVGVEAK						108468								50914.4							79445.9	50914.4	101037	52981.7
40S ribosomal protein S23 OS=Mus musculus GN=Rps23 PE=2 SV=3	VANVSLLALYK		401340				1399240				401341				656792			392985	401341	1.1921e+06	2.15613e+06	559984	656792	1.38021e+06	1.2473e+06
40S ribosomal protein S25 OS=Mus musculus GN=Rps25 PE=2 SV=1	AALQELLSK		150437				329303				150438				154572			30739.7	150438	604671	200827	243031	154572	165203	262220
40S ribosomal protein S25 OS=Mus musculus GN=Rps25 PE=2 SV=1	AQVIYTR		513748				1796280				513749				843159			184331	513749	440145	306608	1.02851e+06	843159	646842	105228
40S ribosomal protein S25 OS=Mus musculus GN=Rps25 PE=2 SV=1	LITPAVVSER		87285.4				171945	181715			87286.4				80710	37008.8		30504.6	87286.4	171880	51227.2	132805	80710	37008.8	50169.5
40S ribosomal protein S25 OS=Mus musculus GN=Rps25 PE=2 SV=1	NTKGGDAPAAGEDA		298916				498373				298917				233932			466425	298917	593185	311054	208182	233932	237439	89662.8
40S ribosomal protein S3 OS=Mus musculus GN=Rps3 PE=1 SV=1	AELNEFLTR		524231	1088540							524232	262185						316092	524232	262185	704058
40S ribosomal protein S3 OS=Mus musculus GN=Rps3 PE=1 SV=1	AVQISKK		1510600			241088					1510601			665388				2.37509e+06	1510601	1.61449e+06	2.56262e+06	665388	283787	823049	516376
40S ribosomal protein S3 OS=Mus musculus GN=Rps3 PE=1 SV=1	DEILPTTPISEQK		647418	3636380		282794	346664	5650240			647419	875856		780494	162722	1.15074e+06		918561	647419	875856	93979	780494	162722	1.15074e+06	632206
40S ribosomal protein S3 OS=Mus musculus GN=Rps3 PE=1 SV=1	ELAEDGYSGVEVR	168853	3458400	4736830		1042450	5151920	5161390		877185	3.4584e+06	1.14091e+06		2.87709e+06	2.41827e+06	1.05118e+06		877185	3.4584e+06	1.14091e+06	1.38856e+06	2.87709e+06	2.41827e+06	1.05118e+06	4.19435e+06
40S ribosomal protein S3 OS=Mus musculus GN=Rps3 PE=1 SV=1	ELTAVVQKR		662824	805536			1617430	1577550			662825	194021			759208	321288		319137	662825	194021	137450	4.28655e+06	759208	321288	407027
40S ribosomal protein S3 OS=Mus musculus GN=Rps3 PE=1 SV=1	FGFPEGSVELYAEK			1983920			1097650					477846			515228			307149	203800	477846	370833	1.60775e+06	515228	921365	392007
40S ribosomal protein S3 OS=Mus musculus GN=Rps3 PE=1 SV=1	FGFPEGSVELYAEKVATR			532832				3151940				128338				641933		195961	110537	128338	154034	216338	839216	641933	1.93873e+06
40S ribosomal protein S3 OS=Mus musculus GN=Rps3 PE=1 SV=1	FIMESGAK		1285560								1.28556e+06							8.36085e+06	1.28556e+06	739548	2.77787e+06
40S ribosomal protein S3 OS=Mus musculus GN=Rps3 PE=1 SV=1	FVDGLMIHSGDPVNYYVDTAVR						553626								259868							236459	259868	420379	319235
40S ribosomal protein S3 OS=Mus musculus GN=Rps3 PE=1 SV=1	GCEVVVSGK		369999	941745							370000	226828						2.51437e+06	370000	226828	238751
40S ribosomal protein S3 OS=Mus musculus GN=Rps3 PE=1 SV=1	GGKPEPPAMPQPVPTA		278076	316302				801575			278077	76184.5				163251		454187	278077	76184.5	110741	207508	153362	163251	223876
40S ribosomal protein S3 OS=Mus musculus GN=Rps3 PE=1 SV=1	GLCAIAQAESLR		866676	1793400		70363.1	776937	2753680			866677	431957		194200	364688	560822		206202	866677	431957	1.84789e+06	194200	364688	560822	84901.6
40S ribosomal protein S3 OS=Mus musculus GN=Rps3 PE=1 SV=1	HVLLR		5106850	1841060				2974580			5.10685e+06	443437				605811		1.36929e+06	5.10685e+06	443437	1.84863e+06	1.0137e+06	867641	605811	1.47918e+06
40S ribosomal protein S3 OS=Mus musculus GN=Rps3 PE=1 SV=1	IRELTAVVQKR		545950	1614130							545951	388779						585608	545951	388779	631798
40S ribosomal protein S3 OS=Mus musculus GN=Rps3 PE=1 SV=1	KPLPDHVSIVEPK			563589				116008				135746				23626.7		691369	350861	135746	33778.8	16772.7	47781.8	23626.7	125611
40S ribosomal protein S3 OS=Mus musculus GN=Rps3 PE=1 SV=1	KPLPDHVSIVEPKDEILPTTPISEQK			719747				2164500				173358				440828		290079	248283	173358	423279	141210	97887.2	440828	205924
40S ribosomal protein S3 OS=Mus musculus GN=Rps3 PE=1 SV=1	LLGGLAVR			1683280								405434						287819	819935	405434	2.15548e+06
40S ribosomal protein S3 OS=Mus musculus GN=Rps3 PE=1 SV=1	QGVLGIKVK							442521								90125.2						34629.5	479640	90125.2	28606.4
40S ribosomal protein S3 OS=Mus musculus GN=Rps3 PE=1 SV=1	RACYGVLR		1044590								1044591							334614	1044591	254813	487960
40S ribosomal protein S3 OS=Mus musculus GN=Rps3 PE=1 SV=1	TEIIILATR						214188								100538							260601	100538	34932.5	212536
40S ribosomal protein S3 OS=Mus musculus GN=Rps3 PE=1 SV=1	VTPTRTEIIILATR		1137730	2819450			1789980				1.13773e+06	679091			840202			337741	1.13773e+06	679091	278998	1.43142e+06	840202	2.79797e+06	938219
40S ribosomal protein S3 OS=Mus musculus GN=Rps3 PE=1 SV=1	YKLLGGLAVR			203478				124786				49009.8				25414.4		127036	29687.5	49009.8	103605	101221	39056.3	25414.4	27905.5
40S ribosomal protein S4, X isoform OS=Mus musculus GN=Rps4x PE=2 SV=2	DANGNSFATR		1.0065e+07			3536270	179859				1.0065e+07			9.75985e+06	84424.7			1.71474e+07	1.0065e+07	3.35177e+07	1.12392e+07	9.75985e+06	84424.7	569341	765862
40S ribosomal protein S4, X isoform OS=Mus musculus GN=Rps4x PE=2 SV=2	ECLPLIIFLR		716453		319318		4425130				716454		1.27084e+06		2.07712e+06			3.80039e+06	716454	3.61615e+06	1.27084e+06	1.14152e+06	2.07712e+06	2.55586e+06	2.46819e+06
40S ribosomal protein S4, X isoform OS=Mus musculus GN=Rps4x PE=2 SV=2	ERHPGSFDVVHVK						1334280	208627							626300	42489.7						287008	626300	42489.7	56861.2
40S ribosomal protein S4, X isoform OS=Mus musculus GN=Rps4x PE=2 SV=2	FAVHR				2584150	4961590	75844000						1.02845e+07	1.36936e+07	3.56005e+07			3.62602e+06	8.34362e+07	6.45058e+06	1.02845e+07	1.36936e+07	3.56005e+07	5.27897e+06	4.46917e+07
40S ribosomal protein S4, X isoform OS=Mus musculus GN=Rps4x PE=2 SV=2	FDTGNLCMVTGGANLGR		4529710				5084230	283143			4.52971e+06				2.38649e+06	57665.8		2.48939e+06	4.52971e+06	5.57373e+06	5.38254e+06	242331	2.38649e+06	57665.8	112443
40S ribosomal protein S4, X isoform OS=Mus musculus GN=Rps4x PE=2 SV=2	FIKIDGK					3932750								1.08541e+07								1.08541e+07	1.93214e+07	1.84157e+07	7.43181e+06
40S ribosomal protein S4, X isoform OS=Mus musculus GN=Rps4x PE=2 SV=2	FIKIDGKVR		989506				4114080				989507				1.93111e+06			1.74093e+06	989507	892697	344907	9.07514e+06	1.93111e+06	1.43798e+06	1.58534e+06
40S ribosomal protein S4, X isoform OS=Mus musculus GN=Rps4x PE=2 SV=2	GIPHLVTHDAR		27090600				14958500				2.70906e+07				7.02139e+06			9.86185e+06	2.70906e+07	6.47709e+06	5.48351e+07	645162	7.02139e+06	9.60286e+06	2.87532e+06
40S ribosomal protein S4, X isoform OS=Mus musculus GN=Rps4x PE=2 SV=2	HPGSFDVVHVK						1368140								642194							3.70709e+06	642194	927043	382258
40S ribosomal protein S4, X isoform OS=Mus musculus GN=Rps4x PE=2 SV=2	IFVGTK		20809884			4476970			1333120		2.08099e+07			1.23561e+07			2.49103e+06	1.35938e+07	2.08099e+07	2.07763e+07	6.30759e+06	1.23561e+07	1.50598e+06	1.09454e+07	2.49103e+06
40S ribosomal protein S4, X isoform OS=Mus musculus GN=Rps4x PE=2 SV=2	IGVITNR	7265160	117937000		12368300		117185780		14994900	3.7742e+07	1.17937e+08		4.92238e+07		5.5006e+07		2.80191e+07	3.7742e+07	1.17937e+08	1.02285e+08	4.92238e+07	4.40239e+07	5.5006e+07	5.00756e+07	2.80191e+07
40S ribosomal protein S4, X isoform OS=Mus musculus GN=Rps4x PE=2 SV=2	KIFVGTK							3703550								754275						955350	403041	754275	2.821e+06
40S ribosomal protein S4, X isoform OS=Mus musculus GN=Rps4x PE=2 SV=2	LIYDTK						20079400								9.4251e+06							1.80279e+07	9.4251e+06	4.45298e+06	4.48926e+06
40S ribosomal protein S4, X isoform OS=Mus musculus GN=Rps4x PE=2 SV=2	LIYDTKGR		8267820				9466970				8.26782e+06				4.44371e+06			3.88541e+07	8.26782e+06	6.15654e+06	6.78745e+06	1.29692e+06	4.44371e+06	3.576e+06	1.47011e+07
40S ribosomal protein S4, X isoform OS=Mus musculus GN=Rps4x PE=2 SV=2	LKYALTGDEVK		1638240					378432			1.63824e+06					77072.6		150530	1.63824e+06	2.24055e+06	670873	39506.2	53027.7	77072.6	169406
40S ribosomal protein S4, X isoform OS=Mus musculus GN=Rps4x PE=2 SV=2	LKYALTGDEVKK		1029160				970671				1029161				455625			5.94088e+06	1029161	1.48565e+06	612596	479907	455625	462107	530124
40S ribosomal protein S4, X isoform OS=Mus musculus GN=Rps4x PE=2 SV=2	LRECLPLIIFLR						18799.7								8824.89							3398.53	8824.89	7524.08	8406.53
40S ribosomal protein S4, X isoform OS=Mus musculus GN=Rps4x PE=2 SV=2	LSNIFVIGK		9506900	4330460	3187220	8348310		7853630			9.5069e+06	1.04303e+06	1.26846e+07	2.30407e+07		1.59949e+06		5.48655e+06	9.5069e+06	1.04303e+06	1.26846e+07	2.30407e+07	3.39298e+06	1.59949e+06	4.70828e+06
40S ribosomal protein S4, X isoform OS=Mus musculus GN=Rps4x PE=2 SV=2	LTIAEER		26491700	467650					5120480		2.64917e+07	112638					9.56799e+06	1.93711e+06	2.64917e+07	112638	2.16183e+06	1.36684e+07	1.87119e+07	4.22844e+06	9.56799e+06
40S ribosomal protein S4, X isoform OS=Mus musculus GN=Rps4x PE=2 SV=2	TDITYPAGFMDVISIDK		1373930								1.37393e+06							1.74019e+06	1.37393e+06	2.80723e+06	5.13853e+06
40S ribosomal protein S4, X isoform OS=Mus musculus GN=Rps4x PE=2 SV=2	TDITYPAGFMDVISIDKTGENFR						2097590								984591							5.75501e+06	984591	484292	463871
40S ribosomal protein S4, X isoform OS=Mus musculus GN=Rps4x PE=2 SV=2	TGENFR	433775	19329700						670785	2.25344e+06	1.93297e+07						1.25341e+06	2.25344e+06	1.93297e+07	3.11818e+06	3.14358e+06	987408	5.01734e+06	1.2678e+06	1.25341e+06
40S ribosomal protein S4, X isoform OS=Mus musculus GN=Rps4x PE=2 SV=2	TIRYPDPLIK		9246030		404388		1385150	3823090			9.24603e+06		1.6094e+06		650178	778621		1.12584e+06	9.24603e+06	3.10429e+06	1.6094e+06	1.21055e+06	650178	778621	923613
40S ribosomal protein S4, X isoform OS=Mus musculus GN=Rps4x PE=2 SV=2	VNDTIQIDLETGK	257405	457449			2734150		1251800		1.33721e+06	457450			7.54606e+06		254945		1.33721e+06	457450	848578	1.7191e+06	7.54606e+06	788137	254945	2.80645e+06
40S ribosomal protein S4, X isoform OS=Mus musculus GN=Rps4x PE=2 SV=2	YALTGDEVK					5365200			1239360					1.48076e+07			2.31584e+06					1.48076e+07	5.60525e+06	3.14966e+06	2.31584e+06
40S ribosomal protein S4, X isoform OS=Mus musculus GN=Rps4x PE=2 SV=2	YALTGDEVKK		6202260			1034200					6.20226e+06			2.85432e+06				6.5328e+06	6.20226e+06	6.2905e+06	7.21638e+06	2.85432e+06	1.444e+06	3.63436e+06	1.40886e+06
40S ribosomal protein S6 OS=Mus musculus GN=Rps6 PE=1 SV=1	DIPGLTDTTVPR		7741710	7538493		11213300	20943000	5740540			7.74171e+06	1.81572e+06		3.09479e+07	9.83046e+06	1.16913e+06		1.44386e+06	7.74171e+06	1.81572e+06	3.5715e+06	3.09479e+07	9.83046e+06	1.16913e+06	1.96365e+07
40S ribosomal protein S6 OS=Mus musculus GN=Rps6 PE=1 SV=1	GCIVDANLSVLNLVIVK						705444								331130							270195	331130	481548	864154
40S ribosomal protein S6 OS=Mus musculus GN=Rps6 PE=1 SV=1	GEKDIPGLTDTTVPR		328075				1303310	294845			328076				611763	60049.1		499716	328076	305215	254447	81745.7	611763	60049.1	113016
40S ribosomal protein S6 OS=Mus musculus GN=Rps6 PE=1 SV=1	IQRLVTPR						4782290								2.24477e+06							393541	2.24477e+06	263521	368487
40S ribosomal protein S6 OS=Mus musculus GN=Rps6 PE=1 SV=1	IRKLFNLSKEDDVR							1401320								285397						200749	851179	285397	376303
40S ribosomal protein S6 OS=Mus musculus GN=Rps6 PE=1 SV=1	KGEKDIPGLTDTTVPR		926213	4753000		52262.2	4695710	5364200			926214	1.1448e+06		144243	2.20413e+06	1.09249e+06		1.47102e+06	926214	1.1448e+06	1.69904e+06	144243	2.20413e+06	1.09249e+06	605706
40S ribosomal protein S6 OS=Mus musculus GN=Rps6 PE=1 SV=1	KGEKDIPGLTDTTVPRR							216007								43992.8						65246.7	16101.7	43992.8	96578.2
40S ribosomal protein S6 OS=Mus musculus GN=Rps6 PE=1 SV=1	LFNLSKEDDVR			9964950	600565		3889830					2.40015e+06	2.39015e+06		1.82585e+06			1.39998e+07	681175	2.40015e+06	2.39015e+06	1.54548e+06	1.82585e+06	1.00262e+06	1.1536e+06
40S ribosomal protein S6 OS=Mus musculus GN=Rps6 PE=1 SV=1	LIEVDDER	1842950	16492584	9022167		15323200	1131920	9611780	74277.4	9.57401e+06	16492585	2.17307e+06		4.22909e+07	531314	1.95756e+06	138795	9.57401e+06	16492585	2.17307e+06	3.86627e+06	4.22909e+07	531314	1.95756e+06	138795
40S ribosomal protein S6 OS=Mus musculus GN=Rps6 PE=1 SV=1	LIEVDDERK		873426				5874390				873427				2.75739e+06			1.48604e+06	873427	2.28151e+06	1.1338e+06	1.71224e+06	2.75739e+06	523797	3.72682e+06
40S ribosomal protein S6 OS=Mus musculus GN=Rps6 PE=1 SV=1	LIEVDDERKLR			1975960								475929						1.55969e+06	270433	475929	962978
40S ribosomal protein S6 OS=Mus musculus GN=Rps6 PE=1 SV=1	LNISFPATGCQK					228099								629540								629540	1.17267e+06	977713	58369.3
40S ribosomal protein S6 OS=Mus musculus GN=Rps6 PE=1 SV=1	LSSLRASTSKSESSQK						1704000								799843							1.31831e+06	799843	814930	535846
40S ribosomal protein S6 OS=Mus musculus GN=Rps6 PE=1 SV=1	MATEVAADALGEEWK		963137				1235700				963138				580027			1.68523e+06	963138	518032	458759	1.20275e+06	580027	2.78273e+06	939593
40S ribosomal protein S6 OS=Mus musculus GN=Rps6 PE=1 SV=1	MATEVAADALGEEWKGYVVR		514210	438475			13645500	1598330			514211	105611			6.40508e+06	325520		207469	514211	105611	115024	8.97602e+06	6.40508e+06	325520	2.65994e+06
40S ribosomal protein S6 OS=Mus musculus GN=Rps6 PE=1 SV=1	MKLNISFPATGCQK			979901								236019						401313	534374	236019	654116
40S ribosomal protein S6 OS=Mus musculus GN=Rps6 PE=1 SV=1	NKEEAAEYAK		4605000				3239760				4.605e+06				1.52072e+06			3.75759e+06	4.605e+06	6.69686e+06	1.20177e+07	3.15181e+06	1.52072e+06	408196	1.03704e+06
40S ribosomal protein S6 OS=Mus musculus GN=Rps6 PE=1 SV=1	NKEEAAEYAKLLAK						774529								363558							616540	363558	329247	312929
40S ribosomal protein S6 OS=Mus musculus GN=Rps6 PE=1 SV=1	QGVLTHGR		6717890			1942760	23547612				6.71789e+06			5.36188e+06	1.1053e+07			2.86519e+06	6.71789e+06	2.32265e+07	3.96119e+06	5.36188e+06	1.1053e+07	2.27448e+06	3.48853e+07
40S ribosomal protein S6 OS=Mus musculus GN=Rps6 PE=1 SV=1	QYVVR		20268180			12269100	59783200	8022240			20268181			3.38618e+07	2.80617e+07	1.63383e+06		3.55332e+06	20268181	2.37935e+06	3.3271e+06	3.38618e+07	2.80617e+07	1.63383e+06	2.28347e+07
40S ribosomal protein S6 OS=Mus musculus GN=Rps6 PE=1 SV=1	RLSSLR			2899500				13752900				698372				2.80095e+06		491238	2.08285e+06	698372	920822	564955	6.15213e+06	2.80095e+06	1.70111e+07
40S ribosomal protein S6 OS=Mus musculus GN=Rps6 PE=1 SV=1	RQEQIAK					4216980								1.16386e+07								1.16386e+07	1.24237e+07	1.59298e+07	3.33837e+07
40S ribosomal protein S6 OS=Mus musculus GN=Rps6 PE=1 SV=1	RQEQIAKR						1437060	624983							674544	127286						204144	674544	127286	144128
40S ribosomal protein S6 OS=Mus musculus GN=Rps6 PE=1 SV=1	TFYEKR			225322	1951700		45807900	14055300				54271.1	7.76744e+06		2.15018e+07	2.86254e+06		591012	654029	54271.1	7.76744e+06	1.15411e+07	2.15018e+07	2.86254e+06	4.54888e+07
40S ribosomal protein S6 OS=Mus musculus GN=Rps6 PE=1 SV=1	VLQHKR			2277700								548606						813651	200794	548606	1.20437e+06
40S ribosomal protein S6 OS=Mus musculus GN=Rps6 PE=1 SV=1	VRLLLSK						3689420								1.73178e+06							7.79603e+06	1.73178e+06	220107	379040
40S ribosomal protein S7 OS=Mus musculus GN=Rps7 PE=2 SV=1	DVNFEFPEFQL		88770.9								88771.9							75140.3	88771.9	48746.8	56087.5
40S ribosomal protein S7 OS=Mus musculus GN=Rps7 PE=2 SV=1	EIEVGGGR		570368								570369							651867	570369	388679	321035
40S ribosomal protein S8 OS=Mus musculus GN=Rps8 PE=1 SV=2	ELEFYLR		30454.2								30455.2							18911.5	30455.2	5785.31	41162.6
40S ribosomal protein S8 OS=Mus musculus GN=Rps8 PE=1 SV=2	IIDVVYNASNNELVR		460692	354338				344999			460693	85345.9				70263.6		162007	460693	85345.9	18384.8	36141	182354	70263.6	11732.1
40S ribosomal protein S8 OS=Mus musculus GN=Rps8 PE=1 SV=2	ISSLLEEQFQQGK		87136.8	758463		303894		951701			87137.8	182683		838728		193826		207953	87137.8	182683	84525.4	838728	1.60094e+06	193826	212392
40S ribosomal protein S9 OS=Mus musculus GN=Rps9 PE=2 SV=3	KGQGGAGAGDDEEED		139262			188644	2402870				139263			520647	1.12789e+06			288777	139263	668125	225594	520647	1.12789e+06	508801	1.03367e+06
40S ribosomal protein S9 OS=Mus musculus GN=Rps9 PE=2 SV=3	LFEGNALLR			248429								59836.7						371963	30576.5	59836.7	110227
40S ribosomal protein S9 OS=Mus musculus GN=Rps9 PE=2 SV=3	LIGEYGLR								763757								1.42714e+06					1.44823e+06	988949	4.00893e+06	1.42714e+06
40S ribosomal protein S9 OS=Mus musculus GN=Rps9 PE=2 SV=3	NAKKGQGGAGAGDDEEED						329235								154541							317073	154541	411866	148113
5'-3' exoribonuclease 2 OS=Mus musculus GN=Xrn2 PE=1 SV=1	AALEEVYPDLTPEENRR		9907490				10361500				9.90749e+06				4.8636e+06			2.05341e+07	9.90749e+06	2.65941e+06	6.75633e+06	7.24718e+06	4.8636e+06	9.70934e+06	2.24538e+07
5'-3' exoribonuclease 2 OS=Mus musculus GN=Xrn2 PE=1 SV=1	AAMLPGAR		770823				3612800				770824				1.69582e+06			1.3072e+06	770824	698077	663479	2.49396e+06	1.69582e+06	629129	5.37675e+06
5'-3' exoribonuclease 2 OS=Mus musculus GN=Xrn2 PE=1 SV=1	DQPAFTPSGILTPHALGSR						216436								101594							76541.8	101594	49070.2	238990
5'-3' exoribonuclease 2 OS=Mus musculus GN=Xrn2 PE=1 SV=1	DRRPVHLDQAAFR		1103150				3109220				1103151				1.45944e+06			496568	1103151	325925	4.99893e+06	1.05037e+06	1.45944e+06	926038	3.79509e+06
5'-3' exoribonuclease 2 OS=Mus musculus GN=Xrn2 PE=1 SV=1	ELTMASLPFPFDVER		32126.2								32127.2							21400.4	32127.2	13414.1	63356.4
5'-3' exoribonuclease 2 OS=Mus musculus GN=Xrn2 PE=1 SV=1	GVPAFFR						3081710								1.44653e+06							2.57427e+06	1.44653e+06	3.70049e+06	669349
5'-3' exoribonuclease 2 OS=Mus musculus GN=Xrn2 PE=1 SV=1	LLYMAIDGVAPR		561875				776552				561876				364507			113331	561876	545145	3.41246e+06	180475	364507	213593	219422
5'-3' exoribonuclease 2 OS=Mus musculus GN=Xrn2 PE=1 SV=1	NLTVILSDASAPGEGEHK						1031970								484398							361037	484398	1.18329e+06	814845
5'-3' exoribonuclease 2 OS=Mus musculus GN=Xrn2 PE=1 SV=1	NSPGCQVASNPR		1691440				1842150				1691441				864690			553719	1691441	2.31509e+06	4.85168e+06	814941	864690	1.27043e+06	3.90956e+06
5'-3' exoribonuclease 2 OS=Mus musculus GN=Xrn2 PE=1 SV=1	NSSPSISPNTSFASDGSPSPLGGIKR						2600140								1.22048e+06							2.56935e+06	1.22048e+06	2.37192e+06	1.10267e+06
5'-3' exoribonuclease 2 OS=Mus musculus GN=Xrn2 PE=1 SV=1	QAAYEMR		321240								321241							223806	321241	51472.7	158010
5'-3' exoribonuclease 2 OS=Mus musculus GN=Xrn2 PE=1 SV=1	QGYPR		1062470				1819080				1062471				853861			1.56297e+06	1062471	835104	6.16039e+06	720314	853861	596875	566918
5'-3' exoribonuclease 2 OS=Mus musculus GN=Xrn2 PE=1 SV=1	QWKPQLGFNR		1284760				503305				1.28476e+06				236247			5.78366e+06	1.28476e+06	163291	281199	44542.3	236247	347390	130443
5'-3' exoribonuclease 2 OS=Mus musculus GN=Xrn2 PE=1 SV=1	RLLYMAIDGVAPR		2833270				2479010				2.83327e+06				1.16363e+06			1.45733e+06	2.83327e+06	3.69366e+06	473077	1.80771e+06	1.16363e+06	603947	2.07112e+06
5'-3' exoribonuclease 2 OS=Mus musculus GN=Xrn2 PE=1 SV=1	TGGYLTESGYVNLQR		969624				811243				969625				380791			797424	969625	703852	510770	1.32724e+06	380791	1.06e+06	1.63459e+06
5'-3' exoribonuclease 2 OS=Mus musculus GN=Xrn2 PE=1 SV=1	TLGHVTPR		3208490				5152900				3.20849e+06				2.41873e+06			1.85759e+07	3.20849e+06	2.13032e+06	4.32791e+06	5.88374e+06	2.41873e+06	2.21047e+06	4.14483e+06
5'-3' exoribonuclease 2 OS=Mus musculus GN=Xrn2 PE=1 SV=1	VQMIMLAVGEVEDSIFK						65193.4								30601.7							21466.4	30601.7	7935.68	15072
5'-3' exoribonuclease 2 OS=Mus musculus GN=Xrn2 PE=1 SV=1	VREEILAK						3373170								1.58334e+06							2.48821e+06	1.58334e+06	614336	1.55954e+06
5'-3' exoribonuclease 2 OS=Mus musculus GN=Xrn2 PE=1 SV=1	YAWQGVALLPFVDER						249168								116958							26903.8	116958	59053.8	91157.7
5'-3' exoribonuclease 2 OS=Mus musculus GN=Xrn2 PE=1 SV=1	YYIADR						874358								410417							328923	410417	253486	443114
60 kDa heat shock protein, mitochondrial OS=Mus musculus GN=Hspd1 PE=1 SV=1	LVQDVANNTNEEAGDGTTTATVLAR							372271								75817.9						45355.6	121949	75817.9	89711.3
60 kDa heat shock protein, mitochondrial OS=Mus musculus GN=Hspd1 PE=1 SV=1	VGRKGVITVKDGK				605717								2.41066e+06					2.44628e+06	1.67049e+06	6.7717e+06	2.41066e+06
60 kDa heat shock protein, mitochondrial OS=Mus musculus GN=Hspd1 PE=1 SV=1	VTDALNATR							377975								76979.6						89007.9	28465	76979.6	40270.9
60S acidic ribosomal protein P0 OS=Mus musculus GN=Rplp0 PE=1 SV=3	AFLADPSAFAAAAPAAAATTAAPAAAAAPAK			8468670				12139200				2.03976e+06				2.4723e+06		4.185e+06	1.86805e+06	2.03976e+06	1.95492e+06	1.23842e+06	3.98121e+06	2.4723e+06	6.36898e+06
60S acidic ribosomal protein P0 OS=Mus musculus GN=Rplp0 PE=1 SV=3	AGAIAPCEVTVPAQNTGLGPEK			1172120				1240770				282316				252699		420676	683009	282316	1.30337e+06	867319	159324	252699	1.13774e+06
60S acidic ribosomal protein P0 OS=Mus musculus GN=Rplp0 PE=1 SV=3	CFIVGADNVGSK			1334070				986440				321323				200901		472556	76180.3	321323	1.01879e+06	458932	369536	200901	119829
60S acidic ribosomal protein P0 OS=Mus musculus GN=Rplp0 PE=1 SV=3	FLEGVR			7778750			2383600					1.87358e+06			1.11884e+06			1.41158e+06	2.60706e+06	1.87358e+06	4.40744e+06	1.92779e+06	1.11884e+06	4.47125e+06	561725
60S acidic ribosomal protein P0 OS=Mus musculus GN=Rplp0 PE=1 SV=3	GHLENNPALEK							2191300								446286						359911	618973	446286	319284
60S acidic ribosomal protein P0 OS=Mus musculus GN=Rplp0 PE=1 SV=3	GNVGFVFTK			577573								139114						100121	483728	139114	361749
60S acidic ribosomal protein P0 OS=Mus musculus GN=Rplp0 PE=1 SV=3	GTIEILSDVQLIK			730246				1838990				175887				374534		313011	94861.8	175887	81387.7	672021	276892	374534	510274
60S acidic ribosomal protein P0 OS=Mus musculus GN=Rplp0 PE=1 SV=3	IIQLLDDYPK		465653	6318490			298224	6333110			465654	1.52187e+06			139984	1.28982e+06		416804	465654	1.52187e+06	506750	295623	139984	1.28982e+06	1.0107e+06
60S acidic ribosomal protein P0 OS=Mus musculus GN=Rplp0 PE=1 SV=3	QMQQIR						347175								162961							24289.1	162961	128734	465861
60S acidic ribosomal protein P0 OS=Mus musculus GN=Rplp0 PE=1 SV=3	TSFFQALGITTK			670975								161611						120453	68741.9	161611	271858
60S acidic ribosomal protein P0 OS=Mus musculus GN=Rplp0 PE=1 SV=3	VLALSVETEYTFPLTEK							912110								185763						568989	69222.2	185763	51085.6
60S acidic ribosomal protein P2 OS=Mus musculus GN=Rplp2 PE=1 SV=3	NIEDVIAQGVGK			548717				495640				132164				100944		124560	120470	132164	597559	239566	28575.8	100944	244066
60S ribosomal protein L10-like OS=Mus musculus GN=Rpl10l PE=2 SV=1	DGFHIR		609514								609515							1.28315e+06	609515	1.18455e+06	550679
60S ribosomal protein L10-like OS=Mus musculus GN=Rpl10l PE=2 SV=1	EHVIEALR		48587.2								48588.2							40988.8	48588.2	33964.6	32260
60S ribosomal protein L10-like OS=Mus musculus GN=Rpl10l PE=2 SV=1	GAFGKPQGTVAR		1936790								1.93679e+06							365164	1.93679e+06	2.84796e+06	1.06939e+06
60S ribosomal protein L10-like OS=Mus musculus GN=Rpl10l PE=2 SV=1	GVPDAKIR		982173								982174							1.52582e+06	982174	509769	1.74815e+06
60S ribosomal protein L10-like OS=Mus musculus GN=Rpl10l PE=2 SV=1	MLSCAGADR		357048				748973				357049				351562			1.24449e+06	357049	993908	1.53267e+06	290700	351562	167135	481992
60S ribosomal protein L10-like OS=Mus musculus GN=Rpl10l PE=2 SV=1	VHIGQVIMSIR		165828								165829							403392	165829	151551	284171
60S ribosomal protein L10-like OS=Mus musculus GN=Rpl10l PE=2 SV=1	VRLHPFHVIR							573658								116833						242266	103683	116833	186648
60S ribosomal protein L11 OS=Mus musculus GN=Rpl11 PE=1 SV=4	AQDQGEKENPMR						335584								157521							38863.2	157521	274224	172656
60S ribosomal protein L11 OS=Mus musculus GN=Rpl11 PE=1 SV=4	IAVHCTVR		2111420				3802690				2.11142e+06				1.78495e+06			1.48112e+06	2.11142e+06	547537	1.03992e+06	540015	1.78495e+06	1.20476e+06	3.096e+06
60S ribosomal protein L11 OS=Mus musculus GN=Rpl11 PE=1 SV=4	VLEQLTGQTPVFSK		809813	1125898			1521320	1403170			809814	271183			714095	285773		736439	809814	271183	461580	620651	714095	285773	700640
60S ribosomal protein L11 OS=Mus musculus GN=Rpl11 PE=1 SV=4	VLEQLTGQTPVFSKAR							2707220								551360						758029	485644	551360	1.4129e+06
60S ribosomal protein L11 OS=Mus musculus GN=Rpl11 PE=1 SV=4	VREYELR						1903120								893308							1.73995e+06	893308	344913	843295
60S ribosomal protein L12 OS=Mus musculus GN=Rpl12 PE=1 SV=2	ALKEPPR		1531640								1.53164e+06							352323	1.53164e+06	773350	1.19377e+06
60S ribosomal protein L12 OS=Mus musculus GN=Rpl12 PE=1 SV=2	CTGGEVGATSALAPK		2115760				3530210				2115761				1.65705e+06			1.69565e+06	2115761	1.30676e+06	2.28432e+06	4.47143e+06	1.65705e+06	7.37205e+06	854359
60S ribosomal protein L12 OS=Mus musculus GN=Rpl12 PE=1 SV=2	EILGTAQSVGCNVDGR			261791								63055						37720.6	101421	63055	74609.7
60S ribosomal protein L12 OS=Mus musculus GN=Rpl12 PE=1 SV=2	IGPLGLSPK		4002460	30661.8			4858570		1145560		4002461	7385.42			2.28057e+06		2.14056e+06	198794	4002461	7385.42	89942.9	2.4938e+06	2.28057e+06	1.32795e+06	2.14056e+06
60S ribosomal protein L12 OS=Mus musculus GN=Rpl12 PE=1 SV=2	QAQIEVVPSASALIIK		2306760	225583			1966630				2.30676e+06	54334			923120			177339	2.30676e+06	54334	912022	1.4286e+06	923120	951105	3.1984e+06
60S ribosomal protein L12 OS=Mus musculus GN=Rpl12 PE=1 SV=2	VVYLR		4946840				6178280				4.94684e+06				2.90003e+06			1.69787e+07	4.94684e+06	5.52052e+06	2.22725e+07	5.10516e+06	2.90003e+06	1.94703e+06	9.47311e+06
60S ribosomal protein L13 OS=Mus musculus GN=Rpl13 PE=2 SV=3	AKEAAEQDVEK						643758								302175							120778	302175	133926	194057
60S ribosomal protein L13 OS=Mus musculus GN=Rpl13 PE=2 SV=3	EAAEQDVEK		300019	707633	563017						300020	170440	2.24072e+06					1.10952e+06	300020	170440	2.24072e+06
60S ribosomal protein L13 OS=Mus musculus GN=Rpl13 PE=2 SV=3	EAAEQDVEKKK						816068								383056							109852	383056	517120	361190
60S ribosomal protein L13 OS=Mus musculus GN=Rpl13 PE=2 SV=3	GFSLEELR		982316				1171150		248872		982317				549728		465037	1.69255e+06	982317	3.92565e+06	493182	159789	549728	674512	465037
60S ribosomal protein L13 OS=Mus musculus GN=Rpl13 PE=2 SV=3	LATQLTGPVMPIR						1669630								783710							1.53328e+06	783710	148655	358396
60S ribosomal protein L13 OS=Mus musculus GN=Rpl13 PE=2 SV=3	LILFPR		271562								271563							219004	271563	212128	194283
60S ribosomal protein L13 OS=Mus musculus GN=Rpl13 PE=2 SV=3	NKSTESLQANVQR		1376690				1761890		212072		1.37669e+06				827016		396274	2.47018e+06	1.37669e+06	298667	1.87564e+06	1.63123e+06	827016	1.1499e+06	396274
60S ribosomal protein L13 OS=Mus musculus GN=Rpl13 PE=2 SV=3	SKLILFPR		31497.7								31498.7							21914.3	31498.7	8262.51	74922
60S ribosomal protein L13 OS=Mus musculus GN=Rpl13 PE=2 SV=3	STESLQANVQR		1937232	2622397		756669	11311395	367778			1.93723e+06	631629		2.08835e+06	5.30947e+06	74902.8		164873	1.93723e+06	631629	3.16223e+06	2.08835e+06	5.30947e+06	74902.8	908643
60S ribosomal protein L13 OS=Mus musculus GN=Rpl13 PE=2 SV=3	TIGISVDPR		3346704			1709370	13562847				3.3467e+06			4.71774e+06	6.36628e+06			1.02509e+07	3.3467e+06	2.8753e+06	920358	4.71774e+06	6.36628e+06	1.08403e+07	5.02313e+06
60S ribosomal protein L13 OS=Mus musculus GN=Rpl13 PE=2 SV=3	VDTWFNQPAR	115483	284777	382147			2.93468e+06	692255		599932	284778	92043.9			1.37751e+06	140987		599932	284778	92043.9	605755	831880	1.37751e+06	140987	819262
60S ribosomal protein L13 OS=Mus musculus GN=Rpl13 PE=2 SV=3	VITEEEKNFK						432019								202786							196109	202786	173928	311367
60S ribosomal protein L13a OS=Mus musculus GN=Rpl13a PE=1 SV=4	AEGQVLVLDGR		32883				390831				32884				183453			27191.2	32884	15633.3	45084.1	110480	183453	83867.9	129527
60S ribosomal protein L13a OS=Mus musculus GN=Rpl13a PE=1 SV=4	FAYLGR		304586								304587							631594	304587	996075	486597
60S ribosomal protein L13a OS=Mus musculus GN=Rpl13a PE=1 SV=4	QVLLGR						677939								318219							738460	318219	124588	651652
60S ribosomal protein L13a OS=Mus musculus GN=Rpl13a PE=1 SV=4	RGQAALER			529059								127429						31439.1	3.75532e+06	127429	139673
60S ribosomal protein L14 OS=Mus musculus GN=Rpl14 PE=2 SV=3	AAIAAAAAAAAAK		898825	5852445		3421290	1706600	7361048	1364510		898826	1.40962e+06		9.44252e+06	801064	1.49917e+06	2.54969e+06	340540	898826	1.40962e+06	1.95238e+06	9.44252e+06	801064	1.49917e+06	2.54969e+06
60S ribosomal protein L14 OS=Mus musculus GN=Rpl14 PE=2 SV=3	AAIAAAAAAAAAKAK						3963820								1.86058e+06							1.20427e+06	1.86058e+06	6.28167e+06	4.02904e+06
60S ribosomal protein L14 OS=Mus musculus GN=Rpl14 PE=2 SV=3	ALVDGPCTR		1361023			714859	1783860				1.36102e+06			1.97296e+06	837329			1.86993e+06	1.36102e+06	1.53698e+06	2.11092e+06	1.97296e+06	837329	1.00928e+06	1.02365e+06
60S ribosomal protein L14 OS=Mus musculus GN=Rpl14 PE=2 SV=3	LVAIVDVIDQNR		155043	1447046		167720	209175	287776			155044	348535		462898	98185.4	58609.4		319596	155044	348535	595699	462898	98185.4	58609.4	44281.7
60S ribosomal protein L15 OS=Mus musculus GN=Rpl15 PE=2 SV=4	NTLQLHR		371651								371652							723889	371652	143497	350845
60S ribosomal protein L15 OS=Mus musculus GN=Rpl15 PE=2 SV=4	QLSALHR		192148								192149							518500	192149	854852	99070.1
60S ribosomal protein L15 OS=Mus musculus GN=Rpl15 PE=2 SV=4	SLQSVAEER		528655	2387387				434787			528656	575025				88550.1		622307	528656	575025	423339	80848.6	8150.97	88550.1	38323.7
60S ribosomal protein L17 OS=Mus musculus GN=Rpl17 PE=2 SV=3	ETAQAIK					182124								502652								502652	333880	379427	1.58962e+06
60S ribosomal protein L17 OS=Mus musculus GN=Rpl17 PE=2 SV=3	NAESNAELK					713555		305226						1.96936e+06		62163.3						1.96936e+06	458637	62163.3	377778
60S ribosomal protein L17 OS=Mus musculus GN=Rpl17 PE=2 SV=3	YSLDPENPTK					104470								288332								288332	601265	133756	378918
60S ribosomal protein L23 OS=Mus musculus GN=Rpl23 PE=1 SV=1	GSAITGPVAK								4615650								8.62468e+06					1.13198e+07	8.48407e+06	9.80453e+06	8.62468e+06
60S ribosomal protein L23 OS=Mus musculus GN=Rpl23 PE=1 SV=1	ISLGLPVGAVINCADNTGAK							1911170	2357280							389234	4.40475e+06					1.83973e+06	558934	389234	4.40475e+06
60S ribosomal protein L23a OS=Mus musculus GN=Rpl23a PE=1 SV=1	LAPDYDALDVANK			1210250			1202960	1643650				291500			564659	334750		451120	1.2578e+06	291500	1.00998e+06	2.24313e+06	564659	334750	743275
60S ribosomal protein L23a OS=Mus musculus GN=Rpl23a PE=1 SV=1	LAPDYDALDVANKIGII			479078				1116025				115391				227293		203132	268096	115391	376930	431988	256270	227293	194479
60S ribosomal protein L24 OS=Mus musculus GN=Rpl24 PE=2 SV=2	AITGASLADIMAK	237985	3515373			4091051	10706651		3183260	1.23632e+06	3.51537e+06			1.1291e+07	5.02561e+06		5.94815e+06	1.23632e+06	3.51537e+06	923973	1.33882e+06	1.1291e+07	5.02561e+06	5.53544e+06	5.94815e+06
60S ribosomal protein L24 OS=Mus musculus GN=Rpl24 PE=2 SV=2	CESAFLSK		760709				2934140				760710				1.37726e+06			218156	760710	1.02695e+06	717286	3.28919e+06	1.37726e+06	501888	929600
60S ribosomal protein L24 OS=Mus musculus GN=Rpl24 PE=2 SV=2	CESAFLSKR						567591								266423							135531	266423	253241	919213
60S ribosomal protein L24 OS=Mus musculus GN=Rpl24 PE=2 SV=2	GQSEEIQK					855638								2.3615e+06								2.3615e+06	2.41457e+06	745711	7.18905e+06
60S ribosomal protein L24 OS=Mus musculus GN=Rpl24 PE=2 SV=2	IVKPVKVSAPR		349919								349920							110585	349920	466810	828226
60S ribosomal protein L24 OS=Mus musculus GN=Rpl24 PE=2 SV=2	IYPGHGR		1119750				2642520				1119751				1.24038e+06			2.19072e+06	1119751	212396	512069	909823	1.24038e+06	747550	172983
60S ribosomal protein L24 OS=Mus musculus GN=Rpl24 PE=2 SV=2	QINWTVLYR						147358								69169							67313.4	69169	88479.4	248879
60S ribosomal protein L24 OS=Mus musculus GN=Rpl24 PE=2 SV=2	TAMAAAKAPTK					328086	544564							905496	255614							905496	255614	628253	407828
60S ribosomal protein L24 OS=Mus musculus GN=Rpl24 PE=2 SV=2	VFQFLNAK		253584				3428420				253585				1.60927e+06			722578	253585	509363	150247	272740	1.60927e+06	1.04607e+06	1.63416e+06
60S ribosomal protein L26 OS=Mus musculus GN=Rpl26 PE=2 SV=1	DDEVQVVR		1640880				4430750				1.64088e+06				2.07976e+06			2.29612e+06	1.64088e+06	4.44917e+06	1.58618e+06	702158	2.07976e+06	2.28093e+06	2.13271e+06
60S ribosomal protein L26 OS=Mus musculus GN=Rpl26 PE=2 SV=1	HFNAPSHIR						2096020								983854							876794	983854	2.24687e+06	1.8297e+06
60S ribosomal protein L26 OS=Mus musculus GN=Rpl26 PE=2 SV=1	KDDEVQVVR		750593			165218	1361530				750594			455992	639091			1.60034e+06	750594	1.48469e+06	687970	455992	639091	390291	226767
60S ribosomal protein L26 OS=Mus musculus GN=Rpl26 PE=2 SV=1	MKFNPFVTSDR						131243								61604.8							89422.5	61604.8	6137.9	21839.4
60S ribosomal protein L26 OS=Mus musculus GN=Rpl26 PE=2 SV=1	VVQVYR		3723890				10988000				3.72389e+06				5.15767e+06			7.02944e+06	3.72389e+06	1.4786e+06	6.92282e+06	5.48621e+06	5.15767e+06	1.36313e+06	3.05579e+06
60S ribosomal protein L26 OS=Mus musculus GN=Rpl26 PE=2 SV=1	YKEETIEK						384084								180286							160043	180286	283872	180904
60S ribosomal protein L26 OS=Mus musculus GN=Rpl26 PE=2 SV=1	YVIYIER		584555				1725310				584556				809846			565306	584556	501368	897552	1.06574e+06	809846	3.01123e+06	809586
60S ribosomal protein L27 OS=Mus musculus GN=Rpl27 PE=2 SV=2	VVLVLAGR						1077310	420742							505680	85689.6						628854	505680	85689.6	116473
60S ribosomal protein L27 OS=Mus musculus GN=Rpl27 PE=2 SV=2	YSVDIPLDK						674788	936300							316740	190689						109031	316740	190689	203856
60S ribosomal protein L27a OS=Mus musculus GN=Rpl27a PE=2 SV=5	NKTGVAPIIDVVR			743931			2560010					179183			1.20165e+06			107909	277151	179183	126512	4.47826e+06	1.20165e+06	473215	5.13882e+06
60S ribosomal protein L27a OS=Mus musculus GN=Rpl27a PE=2 SV=5	QPVIVK						2205500								1.03524e+06							1.74186e+06	1.03524e+06	1.58351e+06	1.26805e+06
60S ribosomal protein L27a OS=Mus musculus GN=Rpl27a PE=2 SV=5	TGVAPIIDVVR		175760	1130862							175761	272379						507748	175761	272379	448062
60S ribosomal protein L28 OS=Mus musculus GN=Rpl28 PE=1 SV=2	ASAILR						27648300								1.29779e+07							2.07594e+06	1.29779e+07	1.27857e+07	2.42488e+07
60S ribosomal protein L28 OS=Mus musculus GN=Rpl28 PE=1 SV=2	ATLSSIR		4291490								4.29149e+06							1.76554e+06	4.29149e+06	846828	1.65178e+06
60S ribosomal protein L28 OS=Mus musculus GN=Rpl28 PE=1 SV=2	KPATSYVR		2046760				21650990				2.04676e+06				1.01628e+07			1.32478e+06	2.04676e+06	6.91024e+06	4.4322e+06	2.29778e+07	1.01628e+07	2.45819e+07	8.96847e+06
60S ribosomal protein L28 OS=Mus musculus GN=Rpl28 PE=1 SV=2	NKQTYSTEPNNLK		193076				1037450				193077				486970			742203	193077	151613	153771	233998	486970	774328	91339.2
60S ribosomal protein L28 OS=Mus musculus GN=Rpl28 PE=1 SV=2	QTYSTEPNNLK		126047				4895960				126048				2.29812e+06			314285	126048	110220	40264.9	4.10172e+06	2.29812e+06	1.69057e+06	3.53968e+06
60S ribosomal protein L28 OS=Mus musculus GN=Rpl28 PE=1 SV=2	QTYSTEPNNLKAR		211782				1433120				211783				672695			193364	211783	143412	91657.8	1.90503e+06	672695	337735	701502
60S ribosomal protein L28 OS=Mus musculus GN=Rpl28 PE=1 SV=2	RASAILR		4905800								4.9058e+06							8.86715e+06	4.9058e+06	3.70314e+06	1.55145e+07
60S ribosomal protein L28 OS=Mus musculus GN=Rpl28 PE=1 SV=2	SAHLQWMVVR		1220370				9710880				1.22037e+06				4.5582e+06			497843	1.22037e+06	241543	1.31764e+06	2.73864e+06	4.5582e+06	766221	6.20997e+06
60S ribosomal protein L28 OS=Mus musculus GN=Rpl28 PE=1 SV=2	SQKPVVVKR		2624778				19492855				2.62478e+06				9.14978e+06			3.72716e+06	2.62478e+06	1.21763e+06	3.44941e+06	1.31676e+07	9.14978e+06	2.34718e+07	3.19897e+06
60S ribosomal protein L28 OS=Mus musculus GN=Rpl28 PE=1 SV=2	TTINKNAR		212322				4265913		1269060		212323				2.00238e+06		2.37133e+06	278671	212323	241369	315540	5.62048e+06	2.00238e+06	4.0512e+06	2.37133e+06
60S ribosomal protein L28 OS=Mus musculus GN=Rpl28 PE=1 SV=2	TVGVEPAADGK		7679350					885225			7.67935e+06					180287		1.07898e+07	7.67935e+06	2.76336e+06	6.53898e+07	361608	351289	180287	157987
60S ribosomal protein L29 OS=Mus musculus GN=Rpl29 PE=2 SV=2	APAKAQASAPAQAPK					801478	1001784							2.21202e+06	470229							2.21202e+06	470229	534636	4.96338e+06
60S ribosomal protein L29 OS=Mus musculus GN=Rpl29 PE=2 SV=2	AQASAPAQAPK						1148790								539233							644748	539233	331525	217596
60S ribosomal protein L29 OS=Mus musculus GN=Rpl29 PE=2 SV=2	GAQAPKGAQAPVKAP					702302		237906						1.93831e+06		48452.8						1.93831e+06	189367	48452.8	377979
60S ribosomal protein L29 OS=Mus musculus GN=Rpl29 PE=2 SV=2	GAQAPVKAP		3268650	2436734	1449310	4112580	7216960	5718440			3.26865e+06	586910	5.76802e+06	1.13504e+07	3.38758e+06	1.16463e+06		1.14971e+07	3.26865e+06	586910	5.76802e+06	1.13504e+07	3.38758e+06	1.16463e+06	3.45851e+06
60S ribosomal protein L29 OS=Mus musculus GN=Rpl29 PE=2 SV=2	LAFIAHPK		164899	223100			370434				164900	53736			173879			178908	164900	53736	80543.6	235659	173879	156641	97168.2
60S ribosomal protein L3 OS=Mus musculus GN=Rpl3 PE=2 SV=3	AGMTHIVR		717414				315608				717415				148144			471489	717415	570367	641053	59470.7	148144	241747	219113
60S ribosomal protein L3 OS=Mus musculus GN=Rpl3 PE=2 SV=3	FQTMEEK		340317								340318							812751	340318	124015	229702
60S ribosomal protein L3 OS=Mus musculus GN=Rpl3 PE=2 SV=3	HGSLGFLPR			4061760				6948090				978313				1.41507e+06		497673	2.78424e+06	978313	3.37538e+06	1.39368e+06	847254	1.41507e+06	2.30687e+06
60S ribosomal protein L3 OS=Mus musculus GN=Rpl3 PE=2 SV=3	IIAHTQMR		1362040				2132120				1362041				1.0008e+06			905563	1362041	430103	4.14642e+06	969797	1.0008e+06	879998	2.18861e+06
60S ribosomal protein L3 OS=Mus musculus GN=Rpl3 PE=2 SV=3	IYKIGQGYLIKDGK							1071840								218294						150102	255806	218294	405831
60S ribosomal protein L3 OS=Mus musculus GN=Rpl3 PE=2 SV=3	KVACIGAWHPAR		378225	1341900				2059390			378226	323209				419421		256461	378226	323209	48760.4	1.50627e+06	747084	419421	119376
60S ribosomal protein L3 OS=Mus musculus GN=Rpl3 PE=2 SV=3	NNASTDYDLSDK			492527			1299040					118630			609759			115447	130602	118630	426846	1.02387e+06	609759	299964	255109
60S ribosomal protein L3 OS=Mus musculus GN=Rpl3 PE=2 SV=3	VACIGAWHPAR						462662	1354860							217170	275935						203763	217170	275935	162817
60S ribosomal protein L3 OS=Mus musculus GN=Rpl3 PE=2 SV=3	VAFSVAR		3661130				7387750				3.66113e+06				3.46775e+06			2.83072e+06	3.66113e+06	4.78095e+06	3.10354e+06	3.3627e+06	3.46775e+06	6.1619e+06	2.76448e+07
60S ribosomal protein L31 OS=Mus musculus GN=Rpl31 PE=2 SV=1	NLQTVNVDEN							525535								107032						252820	144795	107032	79428.4
60S ribosomal protein L31 OS=Mus musculus GN=Rpl31 PE=2 SV=1	SAINEVVTR		2114764				2177080	409224			2.11477e+06				1.0219e+06	83343.8		358411	2.11477e+06	1.37466e+06	2.14747e+06	126534	1.0219e+06	83343.8	88558.8
60S ribosomal protein L32 OS=Mus musculus GN=Rpl32 PE=2 SV=2	AAQLAIRVTNPNAR						1195820								561308							359178	561308	704375	449283
60S ribosomal protein L35 OS=Mus musculus GN=Rpl35 PE=2 SV=1	VLTVINQTQK		167793								167794							56649.9	167794	184025	172066
60S ribosomal protein L36a OS=Mus musculus GN=Rpl36a PE=2 SV=2	DSLYAQGK						133733								62773.6							91831.3	62773.6	155366	14541.7
60S ribosomal protein L36a OS=Mus musculus GN=Rpl36a PE=2 SV=2	LECVEPNCR						332296		876113						155977		1.63708e+06					2.0829e+06	155977	527525	1.63708e+06
60S ribosomal protein L36a OS=Mus musculus GN=Rpl36a PE=2 SV=2	MLAIKR						1615830								758457							1.27372e+06	758457	873077	1.47495e+06
60S ribosomal protein L4 OS=Mus musculus GN=Rpl4 PE=1 SV=3	ACARPLISVYSEK			638762				219388				153852				44681.3		137110	377189	153852	286124	58227.2	109739	44681.3	47874
60S ribosomal protein L4 OS=Mus musculus GN=Rpl4 PE=1 SV=3	ACARPLISVYSEKGESSGK			17510550				2564729				4.21758e+06				522340		7.20779e+07	2.52504e+06	4.21758e+06	1.77167e+06	270991	382509	522340	2.24391e+06
60S ribosomal protein L4 OS=Mus musculus GN=Rpl4 PE=1 SV=3	ILKSPEIQR			5477614				2488180				1.31933e+06				506749		1.91508e+06	733110	1.31933e+06	467714	622394	215685	506749	430055
60S ribosomal protein L4 OS=Mus musculus GN=Rpl4 PE=1 SV=3	KLEAAATALATK			2274566				1971420				547851				401505		582748	1.29862e+06	547851	324588	29524	605069	401505	658277
60S ribosomal protein L4 OS=Mus musculus GN=Rpl4 PE=1 SV=3	KNNRQPYAVSELAGHQTSAESWGTGR							2275870								463510						203822	133275	463510	129251
60S ribosomal protein L4 OS=Mus musculus GN=Rpl4 PE=1 SV=3	NVTLPAVFKAPIRPDIVNFVHTNLR			3198630				3325730				770420				677327		683915	413337	770420	773059	462370	806604	677327	1.28023e+06
60S ribosomal protein L4 OS=Mus musculus GN=Rpl4 PE=1 SV=3	VKKLEAAATALATK			1144860								275750						362882	148363	275750	275662
60S ribosomal protein L6 OS=Mus musculus GN=Rpl6 PE=1 SV=3	AGEKAPDTKEKKPAAK							355247								72350.7						70141.6	35519.7	72350.7	43103.3
60S ribosomal protein L6 OS=Mus musculus GN=Rpl6 PE=1 SV=3	AGSDAAASRPR						1045590	854262							490791	173981						1.36511e+06	490791	173981	729216
60S ribosomal protein L6 OS=Mus musculus GN=Rpl6 PE=1 SV=3	AVDLQILPK			3.85414e+06		20342.9		11102560				928305		56147.7		2.26118e+06		2.80439e+06	637883	928305	519413	56147.7	482736	2.26118e+06	648676
60S ribosomal protein L6 OS=Mus musculus GN=Rpl6 PE=1 SV=3	AVDLQILPKIK							2255086								459277						387464	594508	459277	168699
60S ribosomal protein L6 OS=Mus musculus GN=Rpl6 PE=1 SV=3	AVPQLQGYLR							8223980								1.67492e+06						3.8837e+06	1.03812e+06	1.67492e+06	2.80295e+06
60S ribosomal protein L6 OS=Mus musculus GN=Rpl6 PE=1 SV=3	HQEGEIFDTEKEKYEITEQR			3123440				9367130				752310				1.90773e+06		333759	412052	752310	624031	889569	1.6622e+06	1.90773e+06	906267
60S ribosomal protein L6 OS=Mus musculus GN=Rpl6 PE=1 SV=3	IKAVPQLQGYLR			935517								225328						839746	84417.5	225328	963612
60S ribosomal protein L6 OS=Mus musculus GN=Rpl6 PE=1 SV=3	KAGSDAAASRPR			872739				929827				210208				189371		353688	42101.2	210208	257480	290695	125794	189371	395244
60S ribosomal protein L6 OS=Mus musculus GN=Rpl6 PE=1 SV=3	NPVLVR						868830	439476							407822	89505						90041.9	407822	89505	50169
60S ribosomal protein L6 OS=Mus musculus GN=Rpl6 PE=1 SV=3	SSITPGTVLIILTGR						140831								66105.3							146523	66105.3	145804	44731
60S ribosomal protein L6 OS=Mus musculus GN=Rpl6 PE=1 SV=3	YYPTEDVPR			2233300								537911						86044.4	392224	537911	1.00507e+06
60S ribosomal protein L7 OS=Mus musculus GN=Rpl7 PE=2 SV=2	AGNFYVPAEPK			2124270				10453200				511651				2.12893e+06		1.15683e+06	555282	511651	451522	5.30828e+06	1.77952e+06	2.12893e+06	1.00218e+07
60S ribosomal protein L7 OS=Mus musculus GN=Rpl7 PE=2 SV=2	AGNFYVPAEPKLAFVIR							444066								90439.8						101945	26890	90439.8	156417
60S ribosomal protein L7 OS=Mus musculus GN=Rpl7 PE=2 SV=2	ASINMLR		368801	1282820				404195			368802	308979				82319.6		162207	368802	308979	63316.4	233509	31236	82319.6	100488
60S ribosomal protein L7 OS=Mus musculus GN=Rpl7 PE=2 SV=2	EANNFLWPFKLSSPR							521544								106219						154052	231281	106219	73962.9
60S ribosomal protein L7 OS=Mus musculus GN=Rpl7 PE=2 SV=2	FKEANNFLWPFK							222758								45367.7						107372	63441.9	45367.7	118700
60S ribosomal protein L7 OS=Mus musculus GN=Rpl7 PE=2 SV=2	IALTDNSLIAR		2626750	17764100			3541080	62912400			2.62675e+06	4.27865e+06			1.66215e+06	1.28129e+07		5.9835e+06	2.62675e+06	4.27865e+06	5.16361e+06	5.04409e+06	1.66215e+06	1.28129e+07	1.46187e+06
60S ribosomal protein L7 OS=Mus musculus GN=Rpl7 PE=2 SV=2	IVEPYIAWGYPNLK			3715160			559073	21736600				894831			262424	4.42693e+06		2.5341e+06	170368	894831	933151	356264	262424	4.42693e+06	615990
60S ribosomal protein L7 OS=Mus musculus GN=Rpl7 PE=2 SV=2	KAGNFYVPAEPK			1687180				13388800				406373				2.7268e+06		244155	848687	406373	553632	3.57845e+06	1.27408e+06	2.7268e+06	2.68168e+06
60S ribosomal protein L7 OS=Mus musculus GN=Rpl7 PE=2 SV=2	KKVPAGPK							880570								179339						87474.9	25154.4	179339	235075
60S ribosomal protein L7 OS=Mus musculus GN=Rpl7 PE=2 SV=2	KLIYEK							4117830								838648						86038.5	582499	838648	690076
60S ribosomal protein L7 OS=Mus musculus GN=Rpl7 PE=2 SV=2	KRIALTDNSLIAR							269399								54866.7						90098.9	23880.6	54866.7	52415.1
60S ribosomal protein L7 OS=Mus musculus GN=Rpl7 PE=2 SV=2	KTTHFVEGGDAGNREDQINR							319751								65121.5						55689.6	53911.5	65121.5	144523
60S ribosomal protein L7 OS=Mus musculus GN=Rpl7 PE=2 SV=2	KVATVPGTLKK							10516000								2.14172e+06						1.36141e+06	1.51217e+06	2.14172e+06	1.9327e+06
60S ribosomal protein L7 OS=Mus musculus GN=Rpl7 PE=2 SV=2	KVPAVPETLK							4159870								847210						1.17794e+06	1.56535e+06	847210	766953
60S ribosomal protein L7 OS=Mus musculus GN=Rpl7 PE=2 SV=2	KVPAVPETLKK			1334940				4556960				321533				928083		462723	335308	321533	112415	132521	874466	928083	791027
60S ribosomal protein L7 OS=Mus musculus GN=Rpl7 PE=2 SV=2	LAFVIR						595720								279626							245301	279626	431653	211983
60S ribosomal protein L7 OS=Mus musculus GN=Rpl7 PE=2 SV=2	NFAELK							4853910								988560						271714	469400	988560	1.66327e+06
60S ribosomal protein L7 OS=Mus musculus GN=Rpl7 PE=2 SV=2	RIALTDNSLIAR			1178060				6535900				283747				1.33112e+06		731871	155603	283747	215076	2.15124e+06	4.85815e+06	1.33112e+06	419279
60S ribosomal protein L7 OS=Mus musculus GN=Rpl7 PE=2 SV=2	RKLIYEK							3444940								701606						210385	1.84418e+06	701606	572591
60S ribosomal protein L7 OS=Mus musculus GN=Rpl7 PE=2 SV=2	SVNELIYKR		212865	2911640				11697900			212866	701296				2.38242e+06		774955	212866	701296	338578	3.84095e+06	658301	2.38242e+06	873450
60S ribosomal protein L7 OS=Mus musculus GN=Rpl7 PE=2 SV=2	TTHFVEGGDAGNREDQINR		863069	2944980			1427720	15720700			863070	709326			670160	3.20172e+06		722997	863070	709326	3.8078e+06	1.07944e+06	670160	3.20172e+06	962771
60S ribosomal protein L7 OS=Mus musculus GN=Rpl7 PE=2 SV=2	VPAVPETLKK							956865								194878						348265	660158	194878	1.10476e+06
60S ribosomal protein L7a OS=Mus musculus GN=Rpl7a PE=2 SV=2	AGVNTVTTLVENK		1238260	1412783	540793	3504830		30164778			1.23826e+06	340282	2.15227e+06	9.67308e+06		6.14344e+06		1.15735e+06	1.23826e+06	340282	2.15227e+06	9.67308e+06	4.92127e+06	6.14344e+06	5.69235e+06
60S ribosomal protein L7a OS=Mus musculus GN=Rpl7a PE=2 SV=2	AGVNTVTTLVENKK			838532				3383610				201969				689115		226137	124801	201969	249104	1.88451e+06	398402	689115	813517
60S ribosomal protein L7a OS=Mus musculus GN=Rpl7a PE=2 SV=2	AKAKELATKLG							1254660								255528						2.28928e+06	171856	255528	289402
60S ribosomal protein L7a OS=Mus musculus GN=Rpl7a PE=2 SV=2	AKELATKLG							13975000								2.84619e+06						441261	4.76229e+06	2.84619e+06	3.12493e+06
60S ribosomal protein L7a OS=Mus musculus GN=Rpl7a PE=2 SV=2	HWGGNVLGPK			2421250								583181						1.56182e+06	481471	583181	567975
60S ribosomal protein L7a OS=Mus musculus GN=Rpl7a PE=2 SV=2	KTCTTVAFTQVNSEDKGALAK							10700000								2.17919e+06						582152	581076	2.17919e+06	5.94984e+06
60S ribosomal protein L7a OS=Mus musculus GN=Rpl7a PE=2 SV=2	KVAPAPAVVK					988424								2.72798e+06								2.72798e+06	1.26901e+06	1.13038e+06	2.16223e+06
60S ribosomal protein L7a OS=Mus musculus GN=Rpl7a PE=2 SV=2	KVVNPLFEKRPK							1023200								208388						38504.2	125971	208388	842586
60S ribosomal protein L7a OS=Mus musculus GN=Rpl7a PE=2 SV=2	LKVPPAINQFTQALDR			907724				1288941				218634				262509		296316	451932	218634	122179	333245	1.06683e+06	262509	309155
60S ribosomal protein L7a OS=Mus musculus GN=Rpl7a PE=2 SV=2	NFGIGQDIQPK			9698501		2842490		28095400				2.33597e+06		7.84507e+06		5.72198e+06		937750	2.18779e+06	2.33597e+06	3.45503e+06	7.84507e+06	7.86068e+06	5.72198e+06	5.93974e+06
60S ribosomal protein L7a OS=Mus musculus GN=Rpl7a PE=2 SV=2	NFGIGQDIQPKR							965363								196609						111665	245330	196609	55514
60S ribosomal protein L7a OS=Mus musculus GN=Rpl7a PE=2 SV=2	QTATQLLK			5457850				22850200				1.31457e+06				4.65373e+06		1.29471e+06	787085	1.31457e+06	2.14304e+06	3.78841e+06	2.23969e+06	4.65373e+06	7.0374e+06
60S ribosomal protein L7a OS=Mus musculus GN=Rpl7a PE=2 SV=2	RHWGGNVLGPK							446274								90889.5						344411	688851	90889.5	43180.2
60S ribosomal protein L7a OS=Mus musculus GN=Rpl7a PE=2 SV=2	RPPVLR						805486								378089							1.03235e+06	378089	69141.5	789391
60S ribosomal protein L7a OS=Mus musculus GN=Rpl7a PE=2 SV=2	TCTTVAFTQVNSEDK			605799				1749320				145913				356271		141393	160621	145913	319090	608948	409461	356271	374476
60S ribosomal protein L7a OS=Mus musculus GN=Rpl7a PE=2 SV=2	TCTTVAFTQVNSEDKGALAK							10718400								2.18294e+06						8.8063e+06	1.54847e+06	2.18294e+06	2.19677e+06
60S ribosomal protein L7a OS=Mus musculus GN=Rpl7a PE=2 SV=2	VPPAINQFTQALDR							217519								44300.7						56070.3	9815.59	44300.7	53749.3
60S ribosomal protein L7a OS=Mus musculus GN=Rpl7a PE=2 SV=2	VVNPLFEKRPK							8358220								1.70226e+06						2.7687e+06	2.01496e+06	1.70226e+06	1.25651e+06
60S ribosomal protein L7a OS=Mus musculus GN=Rpl7a PE=2 SV=2	YRPETKQEKK							156814								31937.4						34671.7	36369.6	31937.4	42929
60S ribosomal protein L8 OS=Mus musculus GN=Rpl8 PE=2 SV=2	ASGNYATVISHNPETK		1836770	2759371		2598840		2995830			1.83677e+06	664621		7.17261e+06		610139		759732	1.83677e+06	664621	2.05408e+06	7.17261e+06	1.14272e+07	610139	665405
60S ribosomal protein L8 OS=Mus musculus GN=Rpl8 PE=2 SV=2	AVDFAER						5404970								2.53705e+06							3.4352e+06	2.53705e+06	556702	1.94282e+06
60S ribosomal protein L8 OS=Mus musculus GN=Rpl8 PE=2 SV=2	AVVGVVAGGGR	897964	1.46109e+07	13850706	1072330	9403490	19726100	15033929		4.66487e+06	1.46109e+07	3.33607e+06	4.2677e+06	2.5953e+07	9.25926e+06	3.06185e+06		4.66487e+06	1.46109e+07	3.33607e+06	4.2677e+06	2.5953e+07	9.25926e+06	3.06185e+06	2.21593e+07
60S ribosomal protein L8 OS=Mus musculus GN=Rpl8 PE=2 SV=2	AVVGVVAGGGRIDKPILK		490239	10560610			1282610	16928917			490240	2.54362e+06			602046	3.44779e+06		1.87508e+06	490240	2.54362e+06	467196	2.13427e+06	602046	3.44779e+06	2.07825e+06
60S ribosomal protein L8 OS=Mus musculus GN=Rpl8 PE=2 SV=2	DIIHDPGR		1621470								1621471							1.34969e+06	1621471	2.53916e+06	1.07847e+06
60S ribosomal protein L8 OS=Mus musculus GN=Rpl8 PE=2 SV=2	GAGSVFR		3832920	2731580		1179580					3.83292e+06	657927		3.25556e+06				1.53991e+06	3.83292e+06	657927	1.26596e+07	3.25556e+06	4.30555e+06	2.35452e+06	1.51352e+07
60S ribosomal protein L8 OS=Mus musculus GN=Rpl8 PE=2 SV=2	GIVKDIIHDPGR			498592				396121				120091				80675.2		283666	162461	120091	89119.3	44683.9	214212	80675.2	161852
60S ribosomal protein L8 OS=Mus musculus GN=Rpl8 PE=2 SV=2	GTKTVQEKEN			353364								85111.3						36902.1	98586	85111.3	25827.2
60S ribosomal protein L8 OS=Mus musculus GN=Rpl8 PE=2 SV=2	IDKPILK		878072				1076050				878073				505089			561874	878073	1.10188e+06	702828	639519	505089	455507	404251
60S ribosomal protein L8 OS=Mus musculus GN=Rpl8 PE=2 SV=2	IDKPILKAGR							2149910								437856						628557	390392	437856	373561
60S ribosomal protein L8 OS=Mus musculus GN=Rpl8 PE=2 SV=2	KGAGSVFR							6028160								1.22771e+06						8.29075e+06	1.27786e+06	1.22771e+06	844299
60S ribosomal protein L8 OS=Mus musculus GN=Rpl8 PE=2 SV=2	KVGLIAAR		3669870	10864700			5525150	17220200			3669871	2.61686e+06			2.59346e+06	3.50711e+06		4.53346e+06	3669871	2.61686e+06	717884	3.49962e+06	2.59346e+06	3.50711e+06	6.30733e+06
60S ribosomal protein L8 OS=Mus musculus GN=Rpl8 PE=2 SV=2	KVGLIAARR							7700680								1.56834e+06						712536	1.40318e+06	1.56834e+06	1.24834e+06
60S ribosomal protein L8 OS=Mus musculus GN=Rpl8 PE=2 SV=2	LRAVDFAER			852860								205420						846727	690022	205420	358123
60S ribosomal protein L8 OS=Mus musculus GN=Rpl8 PE=2 SV=2	NCWPR			1239630			479845					298577			225236			501416	158995	298577	580635	79131.5	225236	97290.9	153675
60S ribosomal protein L8 OS=Mus musculus GN=Rpl8 PE=2 SV=2	VGLIAAR		2572700			1167960		6373180			2.5727e+06			3.22349e+06		1.29798e+06		3.35266e+06	2.5727e+06	2.7903e+06	2.75653e+06	3.22349e+06	1.86078e+06	1.29798e+06	1.36344e+06
60S ribosomal protein L8 OS=Mus musculus GN=Rpl8 PE=2 SV=2	VGLIAARR		632143								632144							327958	632144	426752	2.71561e+06
60S ribosomal protein L8 OS=Mus musculus GN=Rpl8 PE=2 SV=2	VKLPSGSK		148801								148802							182760	148802	209201	126281
60S ribosomal protein L8 OS=Mus musculus GN=Rpl8 PE=2 SV=2	VKLPSGSKK		1175130	8364550							1175131	2.01468e+06						113144	1175131	2.01468e+06	2.52269e+06
60S ribosomal protein L9 OS=Mus musculus GN=Rpl9 PE=2 SV=2	ELATVR		7269270								7.26927e+06							3.19656e+06	7.26927e+06	1.10913e+07	2.02706e+06
60S ribosomal protein L9 OS=Mus musculus GN=Rpl9 PE=2 SV=2	FLDGIYVSEK		227193	104850			103394				227194	25254.3			48532.7			51708	227194	25254.3	143172	86857	48532.7	35754.5	75864.2
60S ribosomal protein L9 OS=Mus musculus GN=Rpl9 PE=2 SV=2	FLDGIYVSEKGTVQQADE		706004								706005							684448	706005	3.65512e+06	420606
60S ribosomal protein L9 OS=Mus musculus GN=Rpl9 PE=2 SV=2	TVIVKGPR						1444410								677994							500382	677994	1.77759e+06	707773
78 kDa glucose-regulated protein OS=Mus musculus GN=Hspa5 PE=1 SV=3	ALSSQHQAR					200278								552756								552756	296206	326291	546506
78 kDa glucose-regulated protein OS=Mus musculus GN=Hspa5 PE=1 SV=3	IINEPTAAAIAYGLDK		495423	298311		324145	1563620				495424	71851.2		894620	733950			881400	495424	71851.2	470828	894620	733950	333907	367685
78 kDa glucose-regulated protein OS=Mus musculus GN=Hspa5 PE=1 SV=3	IINEPTAAAIAYGLDKR		1438450	1318290							1438451	317523						276533	1438451	317523	1.23035e+06
78 kDa glucose-regulated protein OS=Mus musculus GN=Hspa5 PE=1 SV=3	ITITNDQNR						815606								382839							85834.3	382839	371119	1.94339e+06
78 kDa glucose-regulated protein OS=Mus musculus GN=Hspa5 PE=1 SV=3	ITPSYVAFTPEGER			398670			1732040					96023.6			813005			81009.4	124297	96023.6	35270.9	240658	813005	446325	573962
78 kDa glucose-regulated protein OS=Mus musculus GN=Hspa5 PE=1 SV=3	RLIGR		3765640								3765641							8.73154e+06	3765641	1.22458e+07	6.30174e+06
78 kDa glucose-regulated protein OS=Mus musculus GN=Hspa5 PE=1 SV=3	SQIFSTASDNQPTVTIK			349342		632362	1138420					84142.5		1.74528e+06	534365			39235.3	73313	84142.5	39971.8	1.74528e+06	534365	311526	1.16185e+06
78 kDa glucose-regulated protein OS=Mus musculus GN=Hspa5 PE=1 SV=3	TWNDPSVQQDIK					330203								911339								911339	741185	904200	1.61108e+06
78 kDa glucose-regulated protein OS=Mus musculus GN=Hspa5 PE=1 SV=3	VEIIANDQGNR		303360			670551	1560610				303361			1.85068e+06	732537			465676	303361	1.22355e+06	633156	1.85068e+06	732537	1.80727e+06	1.1473e+06
78 kDa glucose-regulated protein OS=Mus musculus GN=Hspa5 PE=1 SV=3	VTHAVVTVPAYFNDAQR		140070								140071							66013.7	140071	115393	36781.1
ADP/ATP translocase 2 OS=Mus musculus GN=Slc25a5 PE=1 SV=3	AAYFGIYDTAK		1609000				1166760				1609001				547667			3.56636e+06	1609001	3.54887e+06	1.08875e+06	747114	547667	282275	2.77234e+06
ADP/ATP translocase 2 OS=Mus musculus GN=Slc25a5 PE=1 SV=3	AFFKGAWSNVLR							669696								136392						135031	74312.4	136392	119281
ADP/ATP translocase 2 OS=Mus musculus GN=Slc25a5 PE=1 SV=3	AGAEREFK		567139				519807				567140				243993			1.41411e+06	567140	1.26126e+06	2.66978e+06	140414	243993	475023	96418
ADP/ATP translocase 2 OS=Mus musculus GN=Slc25a5 PE=1 SV=3	DFLAGGVAAAISK						824944								387222							244275	387222	453025	359650
ADP/ATP translocase 2 OS=Mus musculus GN=Slc25a5 PE=1 SV=3	EQGVLSFWR		235046					589333			235047					120025		264949	235047	179277	406518	99964	319614	120025	75089.7
ADP/ATP translocase 2 OS=Mus musculus GN=Slc25a5 PE=1 SV=3	GAWSNVLR		732912				325899	183764			732913				152975	37426.1		2.07899e+06	732913	622764	894674	123046	152975	37426.1	42068.2
ADP/ATP translocase 2 OS=Mus musculus GN=Slc25a5 PE=1 SV=3	GNLANVIR		3563060	1637083	1012250		2447180	1858530	1328040		3.56306e+06	394307	4.02859e+06		1.14869e+06	378513	2.48154e+06	2.58465e+06	3.56306e+06	394307	4.02859e+06	709804	1.14869e+06	378513	2.48154e+06
ADP/ATP translocase 2 OS=Mus musculus GN=Slc25a5 PE=1 SV=3	IPKEQGVLSFWR							1319310								268694						336096	162690	268694	298545
ADP/ATP translocase 2 OS=Mus musculus GN=Slc25a5 PE=1 SV=3	LAADVGK				1402490								5.58168e+06					1.32102e+07	7.80538e+06	8.18837e+06	5.58168e+06
ADP/ATP translocase 2 OS=Mus musculus GN=Slc25a5 PE=1 SV=3	LAADVGKAGAER	69984	3655830			389258	1884019			363567	3.65583e+06			1.07433e+06	884343			363567	3.65583e+06	881097	365205	1.07433e+06	884343	1.2802e+06	1.22234e+06
ADP/ATP translocase 2 OS=Mus musculus GN=Slc25a5 PE=1 SV=3	LLLQVQHASK		928881	553682							928882	133360						116335	928882	133360	201147
ADP/ATP translocase 2 OS=Mus musculus GN=Slc25a5 PE=1 SV=3	MMMQSGR		1495680				2909060				1495681				1.36549e+06			1.96282e+06	1495681	1.645e+06	1.47093e+06	3.32151e+06	1.36549e+06	1.24413e+06	3.04295e+06
ADP/ATP translocase 2 OS=Mus musculus GN=Slc25a5 PE=1 SV=3	QIFLGGVDKR		484033	232687			2455700	3903324			484034	56045.1			1.15268e+06	794961		80336.8	484034	56045.1	215893	1.24693e+06	1.15268e+06	794961	2.56499e+06
ADP/ATP translocase 2 OS=Mus musculus GN=Slc25a5 PE=1 SV=3	TAVAPIER				770290		15325360	180937					3.06563e+06		7.19359e+06	36850.3		314509	2.12929e+06	4.29228e+06	3.06563e+06	1.552e+06	7.19359e+06	36850.3	525247
ADP/ATP translocase 2 OS=Mus musculus GN=Slc25a5 PE=1 SV=3	TAVAPIERVK		3980770					146377			3.98077e+06					29811.7		6.53699e+06	3.98077e+06	4.62367e+06	3.8029e+06	14651	18409.5	29811.7	7850.93
ADP/ATP translocase 2 OS=Mus musculus GN=Slc25a5 PE=1 SV=3	TDAAVSFAKDFLAGGVAAAISK		2701425	12210662			7958409	17326100			2.70143e+06	2.94105e+06			3.73561e+06	3.52868e+06		2.41045e+06	2.70143e+06	2.94105e+06	6.25549e+06	4.33835e+06	3.73561e+06	3.52868e+06	1.91875e+06
ADP/ATP translocase 2 OS=Mus musculus GN=Slc25a5 PE=1 SV=3	TDAAVSFAKDFLAGGVAAAISKTAVAPIER							3769800								767767						3.80367e+06	1.4799e+06	767767	3.45189e+06
ADP/ATP translocase 2 OS=Mus musculus GN=Slc25a5 PE=1 SV=3	TDAAVSFAKDFLAGGVAAAISKTAVAPIERVK							3587490								730638						601657	392349	730638	1.18699e+06
ADP/ATP translocase 2 OS=Mus musculus GN=Slc25a5 PE=1 SV=3	TRLAADVGK		1490080				956700				1490081				449067			947189	1490081	1.70926e+06	1.34466e+06	1.62468e+06	449067	191429	169539
ADP/ATP translocase 2 OS=Mus musculus GN=Slc25a5 PE=1 SV=3	VKLLLQVQHASK						233896								109789							394462	109789	81510.2	173839
ADP/ATP translocase 2 OS=Mus musculus GN=Slc25a5 PE=1 SV=3	YFPTQALNFAFK							3105240								632421						630853	600484	632421	921899
ATP synthase subunit alpha, mitochondrial OS=Mus musculus GN=Atp5a1 PE=1 SV=1	APGIIPR		2250130				4112780				2.25013e+06				1.9305e+06			3.12851e+06	2.25013e+06	6.7839e+06	2.03697e+06	2.55843e+06	1.9305e+06	3.87624e+06	1.51703e+06
ATP synthase subunit alpha, mitochondrial OS=Mus musculus GN=Atp5a1 PE=1 SV=1	AVDSLVPIGR			960475				459774				231340				93639		33033	217975	231340	197176	97720.8	112960	93639	72516.5
ATP synthase subunit alpha, mitochondrial OS=Mus musculus GN=Atp5a1 PE=1 SV=1	EAYPGDVFYLHSR		230283				1761140				230284				826664			202015	230284	355484	174577	632842	826664	319623	299845
ATP synthase subunit alpha, mitochondrial OS=Mus musculus GN=Atp5a1 PE=1 SV=1	EIVTNFLAGFEP		290337								290338							79801.9	290338	138641	488498
ATP synthase subunit alpha, mitochondrial OS=Mus musculus GN=Atp5a1 PE=1 SV=1	ELIIGDR					150591								415623								415623	1.11675e+06	888585	1.97718e+06
ATP synthase subunit alpha, mitochondrial OS=Mus musculus GN=Atp5a1 PE=1 SV=1	EVAAFAQFGSDLDAATQQLLSR		2499610				5306710				2.49961e+06				2.49092e+06			4.03966e+06	2.49961e+06	4.34884e+06	787334	3.5654e+06	2.49092e+06	3.7613e+06	499799
ATP synthase subunit alpha, mitochondrial OS=Mus musculus GN=Atp5a1 PE=1 SV=1	HALIIYDDLSK						984954								462329							180866	462329	475399	155135
ATP synthase subunit alpha, mitochondrial OS=Mus musculus GN=Atp5a1 PE=1 SV=1	ILGADTSVDLEETGR		512375				1590740				512376				746680			153642	512376	1.95488e+06	418158	1.31091e+06	746680	1.32142e+06	727593
ATP synthase subunit alpha, mitochondrial OS=Mus musculus GN=Atp5a1 PE=1 SV=1	ILGADTSVDLEETGRVLSIGDGIAR						172563								81000							39642	81000	116669	59618.6
ATP synthase subunit alpha, mitochondrial OS=Mus musculus GN=Atp5a1 PE=1 SV=1	TSIAIDTIINQK		851873					544586			851874					110912		1.37339e+06	851874	161740	312316	185702	145108	110912	19522.2
ATP synthase subunit alpha, mitochondrial OS=Mus musculus GN=Atp5a1 PE=1 SV=1	TSIAIDTIINQKR						1938890								910099							2.29285e+06	910099	645205	257563
ATP synthase subunit alpha, mitochondrial OS=Mus musculus GN=Atp5a1 PE=1 SV=1	VGLKAPGIIPR		1310170				1963820				1310171				921801			965484	1310171	1.07625e+06	861133	1.59147e+06	921801	403362	2.60998e+06
ATP synthase subunit alpha, mitochondrial OS=Mus musculus GN=Atp5a1 PE=1 SV=1	VVDALGNAIDGK		610260								610261							1.09059e+06	610261	629436	3.45957e+06
ATP synthase subunit beta, mitochondrial OS=Mus musculus GN=Atp5b PE=1 SV=2	ADKLAEEHGS					398133	779734							1.09882e+06	366001							1.09882e+06	366001	218305	2.21298e+06
ATP synthase subunit beta, mitochondrial OS=Mus musculus GN=Atp5b PE=1 SV=2	AHGGYSVFAGVGER		1534910								1.53491e+06							892485	1.53491e+06	2.13799e+06	1.13341e+06
ATP synthase subunit beta, mitochondrial OS=Mus musculus GN=Atp5b PE=1 SV=2	AIAELGIYPAVDPLDSTSR		7725080				1276060				7.72508e+06				598972			2.11256e+07	7.72508e+06	2.39259e+07	9.11965e+06	931416	598972	680535	985075
ATP synthase subunit beta, mitochondrial OS=Mus musculus GN=Atp5b PE=1 SV=2	FTQAGSEVSALLGR		598734				1243110		143902		598735				583506		268893	5.36408e+06	598735	503498	678108	805115	583506	632050	268893
ATP synthase subunit beta, mitochondrial OS=Mus musculus GN=Atp5b PE=1 SV=2	IGLFGGAGVGK		1640720			78634.3	3214710				1640721			217028	1.50896e+06			254371	1640721	2.47468e+06	1.80141e+06	217028	1.50896e+06	1.3499e+06	1.20682e+06
ATP synthase subunit beta, mitochondrial OS=Mus musculus GN=Atp5b PE=1 SV=2	IMDPNIVGNEHYDVAR						3139085								1.47346e+06							4.85067e+06	1.47346e+06	1.72766e+06	3.06847e+06
ATP synthase subunit beta, mitochondrial OS=Mus musculus GN=Atp5b PE=1 SV=2	IMNVIGEPIDER		466760								466761							124691	466761	770618	1.2744e+06
ATP synthase subunit beta, mitochondrial OS=Mus musculus GN=Atp5b PE=1 SV=2	IMNVIGEPIDERGPIKTK		595637								595638							2.32716e+06	595638	246811	472109
ATP synthase subunit beta, mitochondrial OS=Mus musculus GN=Atp5b PE=1 SV=2	LVLEVAQHLGESTVR		1154470				3164570				1.15447e+06				1.48542e+06			213314	1.15447e+06	2.39087e+06	4.66794e+06	1.9491e+06	1.48542e+06	1.93164e+06	1.57435e+06
ATP synthase subunit beta, mitochondrial OS=Mus musculus GN=Atp5b PE=1 SV=2	TIAMDGTEGLVR		2281250				1674920	199604			2.28125e+06				786193	40652.1		2.89595e+06	2.28125e+06	3.24103e+06	2.68661e+06	418695	786193	40652.1	229635
ATP synthase subunit beta, mitochondrial OS=Mus musculus GN=Atp5b PE=1 SV=2	TVLIMELINNVAK		1379870				436209				1.37987e+06				204753			1.1918e+06	1.37987e+06	1.10979e+06	1.2233e+06	391147	204753	228291	192706
ATP synthase subunit beta, mitochondrial OS=Mus musculus GN=Atp5b PE=1 SV=2	VALTGLTVAEYFR							709683								144536						148806	145572	144536	1.61969e+06
ATP synthase subunit beta, mitochondrial OS=Mus musculus GN=Atp5b PE=1 SV=2	VALVYGQMNEPPGAR						880165								413142							200841	413142	209302	225184
ATP synthase subunit beta, mitochondrial OS=Mus musculus GN=Atp5b PE=1 SV=2	VLDSGAPIKIPVGPETLGR		1928270								1.92827e+06							1.09517e+06	1.92827e+06	1.95223e+06	544463
ATP synthase subunit beta, mitochondrial OS=Mus musculus GN=Atp5b PE=1 SV=2	VVDLLAPYAK		814705								814706							663218	814706	141494	1.232e+06
ATP-dependent RNA helicase DDX1 OS=Mus musculus GN=Ddx1 PE=1 SV=1	ALIVEPSR				126682								504177					1.9105e+06	3.82115e+06	1.9166e+06	504177
ATP-dependent RNA helicase DDX1 OS=Mus musculus GN=Ddx1 PE=1 SV=1	ELLIIGGVAAR		461805								461806							1.26094e+06	461806	84451	964180
ATP-dependent RNA helicase DDX39A OS=Mus musculus GN=Ddx39a PE=2 SV=1	DVQEIFR		415381								415382							709982	415382	531592	436607
ATP-dependent RNA helicase DDX39A OS=Mus musculus GN=Ddx39a PE=2 SV=1	ILVATNLFGR		501544								501545							2.02331e+06	501545	422761	504722
ATP-dependent RNA helicase DDX3X OS=Mus musculus GN=Ddx3x PE=1 SV=3	DLLDLLVEAK		167700								167701							212255	167701	549202	203469
ATP-dependent RNA helicase DDX3X OS=Mus musculus GN=Ddx3x PE=1 SV=3	ELAVQIYEEAR		1139200								1.1392e+06							1.8529e+06	1.1392e+06	971395	840891
ATP-dependent RNA helicase DDX3X OS=Mus musculus GN=Ddx3x PE=1 SV=3	FSGGFGAR		657448				1491210				657449				699961			713737	657449	1.76473e+06	883718	706837	699961	2.96332e+06	857365
ATP-dependent RNA helicase DDX3X OS=Mus musculus GN=Ddx3x PE=1 SV=3	MLDMGFEPQIR						577483								271066							32045.9	271066	88425.6	176694
ATP-dependent RNA helicase DDX3X OS=Mus musculus GN=Ddx3x PE=1 SV=3	QSSGASSSSFSSSR		535624			561017	764787				535625			1.54837e+06	358985			477872	535625	179455	170370	1.54837e+06	358985	436403	1.44237e+06
ATP-dependent RNA helicase DDX3X OS=Mus musculus GN=Ddx3x PE=1 SV=3	SGKSPILVATAVAAR		248560				404614				248561				189923			336555	248561	54541.5	190343	285591	189923	203460	416017
ATP-dependent RNA helicase DDX3X OS=Mus musculus GN=Ddx3x PE=1 SV=3	SPILVATAVAAR					88703	851953							244817	399900							244817	399900	307770	393906
ATP-dependent RNA helicase DDX3X OS=Mus musculus GN=Ddx3x PE=1 SV=3	VGNLGLATSFFNER		3002000	618350			3227760				3.002e+06	148936			1.51508e+06			364266	3.002e+06	148936	1.64126e+06	2.99988e+06	1.51508e+06	2.36458e+06	1.59259e+06
ATP-dependent RNA helicase DDX3X OS=Mus musculus GN=Ddx3x PE=1 SV=3	VGSTSENITQK		1284080			1322670	1399120				1.28408e+06			3.65048e+06	656735			1.9022e+06	1.28408e+06	1.30753e+06	1.85227e+06	3.65048e+06	656735	6.28391e+06	498730
ATP-dependent RNA helicase DDX3X OS=Mus musculus GN=Ddx3x PE=1 SV=3	YTRPTPVQK		566198								566199							78751.2	566199	409492	2.63228e+06
Acidic leucine-rich nuclear phosphoprotein 32 family member B OS=Mus musculus GN=Anp32b PE=1 SV=1	DISTLEPLKR							336677								68568.7						148447	42336.6	68568.7	62066.6
Acidic leucine-rich nuclear phosphoprotein 32 family member B OS=Mus musculus GN=Anp32b PE=1 SV=1	ELVLDNCK		1345220								1.34522e+06							745082	1.34522e+06	156779	2.6988e+06
Acidic leucine-rich nuclear phosphoprotein 32 family member B OS=Mus musculus GN=Anp32b PE=1 SV=1	KLELSENR							595669								121316						157255	61189.4	121316	171736
Acidic leucine-rich nuclear phosphoprotein 32 family member B OS=Mus musculus GN=Anp32b PE=1 SV=1	MDMKR		787344								787345							996898	787345	710056	630157
Acidic leucine-rich nuclear phosphoprotein 32 family member B OS=Mus musculus GN=Anp32b PE=1 SV=1	RIHLELR						331379								155547							93102.7	155547	83681.9	848101
Acidic leucine-rich nuclear phosphoprotein 32 family member B OS=Mus musculus GN=Anp32b PE=1 SV=1	SLDLFGCEVTNR							355035								72307.6						43962.4	95607.5	72307.6	265789
Actin, alpha cardiac muscle 1 OS=Mus musculus GN=Actc1 PE=1 SV=1	AGFAGDDAPR			1544808800		78393800	1694558020	941336000				3.72082e+08		2.16361e+08	7.95411e+08	1.91715e+08		5.34135e+08	3.31747e+08	3.72082e+08	3.17444e+08	2.16361e+08	7.95411e+08	1.91715e+08	1.25466e+08
Actin, alpha cardiac muscle 1 OS=Mus musculus GN=Actc1 PE=1 SV=1	AGFAGDDAPRAVFPSIVGRPR			70155410			13717400	67553006				1.68976e+07			6.43883e+06	1.3758e+07		1.1411e+08	1.75879e+07	1.68976e+07	1.16205e+07	2.88097e+07	6.43883e+06	1.3758e+07	7.72249e+06
Actin, alpha cardiac muscle 1 OS=Mus musculus GN=Actc1 PE=1 SV=1	AVFPSIVGRPR			1494402221			1366140000	2767789000				3.59941e+08			6.41254e+08	5.63695e+08		4.17674e+08	4.19066e+08	3.59941e+08	7.5277e+08	7.06749e+08	6.41254e+08	5.63695e+08	7.45281e+08
Actin, alpha cardiac muscle 1 OS=Mus musculus GN=Actc1 PE=1 SV=1	DIKEKLCYVALDFENEMATAASSSSLEKSYELPDGQVITIGNER							2411950								491224						1.08605e+06	527512	491224	1.69872e+06
Actin, alpha cardiac muscle 1 OS=Mus musculus GN=Actc1 PE=1 SV=1	DLTDYLMK						50107900								2.35202e+07							3.14972e+07	2.35202e+07	1.21182e+07	9.95812e+06
Actin, alpha cardiac muscle 1 OS=Mus musculus GN=Actc1 PE=1 SV=1	DLTDYLMKILTER			2840600			2295110	8004370				684185			1.07731e+06	1.63019e+06		310842	612135	684185	544585	2.84478e+06	1.07731e+06	1.63019e+06	783117
Actin, alpha cardiac muscle 1 OS=Mus musculus GN=Actc1 PE=1 SV=1	DSYVGDEAQSK			443838114		9062590	154574370	167404929				1.06903e+08		2.50121e+07	7.25559e+07	3.40941e+07		3.75579e+07	1.72269e+08	1.06903e+08	7.29379e+07	2.50121e+07	7.25559e+07	3.40941e+07	8.84657e+07
Actin, alpha cardiac muscle 1 OS=Mus musculus GN=Actc1 PE=1 SV=1	DSYVGDEAQSKR			214768700		10934800	238369613	150810900				5.1729e+07		3.01793e+07	1.11889e+08	3.07145e+07		2.54881e+07	4.7058e+07	5.1729e+07	3.44805e+07	3.01793e+07	1.11889e+08	3.07145e+07	1.63203e+07
Actin, alpha cardiac muscle 1 OS=Mus musculus GN=Actc1 PE=1 SV=1	EITALAPSTMK			127660700			537180390	183743600				3.07483e+07			2.52148e+08	3.74217e+07		5.50289e+07	1.387e+08	3.07483e+07	4.80644e+07	6.00937e+07	2.52148e+08	3.74217e+07	1.84087e+08
Actin, alpha cardiac muscle 1 OS=Mus musculus GN=Actc1 PE=1 SV=1	EITALAPSTMKIK			51894220			1780106	47756550				1.24992e+07			835567	9.72622e+06		9.22482e+06	1.36022e+07	1.24992e+07	1.30482e+07	3.6025e+06	835567	9.72622e+06	4.7724e+06
Actin, alpha cardiac muscle 1 OS=Mus musculus GN=Actc1 PE=1 SV=1	EITALAPSTMKIKIIAPPER			1545330				1894260				372207				385790		185381	199456	372207	367999	286268	473240	385790	427917
Actin, alpha cardiac muscle 1 OS=Mus musculus GN=Actc1 PE=1 SV=1	EIVRDIKEK			148191000				13793100				3.56932e+07				2.80914e+06		7.43134e+07	1.11743e+07	3.56932e+07	1.6196e+07	755178	4.32132e+06	2.80914e+06	6.13506e+06
Actin, alpha cardiac muscle 1 OS=Mus musculus GN=Actc1 PE=1 SV=1	GILTLK			123880000				25631900				2.98377e+07				5.22026e+06		6.68974e+06	9.26678e+07	2.98377e+07	1.51463e+08	3.17917e+07	6.88909e+06	5.22026e+06	8.10593e+06
Actin, alpha cardiac muscle 1 OS=Mus musculus GN=Actc1 PE=1 SV=1	GILTLKYPIEHGIITNWDDMEK							4505440								917590						432618	5.77962e+06	917590	745615
Actin, alpha cardiac muscle 1 OS=Mus musculus GN=Actc1 PE=1 SV=1	HQGVMVGMGQK			550910			111633000					132692			5.23996e+07			39278.2	401077	132692	93677.4	2.42219e+07	5.23996e+07	1.09053e+08	5.89534e+07
Actin, alpha cardiac muscle 1 OS=Mus musculus GN=Actc1 PE=1 SV=1	HQGVMVGMGQKDSYVGDEAQSK			21545870			128933000	5733094				5.18952e+06			6.052e+07	1.16762e+06		2.22863e+06	2.30436e+06	5.18952e+06	6.24349e+06	9.85526e+06	6.052e+07	1.16762e+06	2.63139e+07
Actin, alpha cardiac muscle 1 OS=Mus musculus GN=Actc1 PE=1 SV=1	HQGVMVGMGQKDSYVGDEAQSKR			48493170			206758973	19100400				1.168e+07			9.70509e+07	3.89004e+06		3.79866e+06	9.49928e+06	1.168e+07	2.06481e+07	6.43231e+07	9.70509e+07	3.89004e+06	6.94274e+06
Actin, alpha cardiac muscle 1 OS=Mus musculus GN=Actc1 PE=1 SV=1	IIAPPER			716902700		32167400	987467000	418487000				1.72673e+08		8.87797e+07	4.63508e+08	8.52302e+07		1.88143e+08	2.27246e+08	1.72673e+08	1.70145e+08	8.87797e+07	4.63508e+08	8.52302e+07	1.02606e+07
Actin, alpha cardiac muscle 1 OS=Mus musculus GN=Actc1 PE=1 SV=1	IIAPPERK			900893700		26120200	919455790	744507200				2.16989e+08		7.20899e+07	4.31585e+08	1.51628e+08		2.9601e+08	9.39244e+07	2.16989e+08	1.09842e+09	7.20899e+07	4.31585e+08	1.51628e+08	1.19529e+08
Actin, alpha cardiac muscle 1 OS=Mus musculus GN=Actc1 PE=1 SV=1	IKIIAPPER			215996650		1390360	189232420	266994750				5.20248e+07		3.8373e+06	8.88241e+07	5.43768e+07		5.15057e+07	2.83454e+07	5.20248e+07	4.5498e+07	3.8373e+06	8.88241e+07	5.43768e+07	4.12374e+07
Actin, alpha cardiac muscle 1 OS=Mus musculus GN=Actc1 PE=1 SV=1	IKIIAPPERK			76019774			147039641	209253700				1.83101e+07			6.90191e+07	4.26172e+07		1.05371e+07	5.30694e+06	1.83101e+07	7.23553e+06	8.11529e+07	6.90191e+07	4.26172e+07	5.05824e+07
Actin, alpha cardiac muscle 1 OS=Mus musculus GN=Actc1 PE=1 SV=1	IWHHTFYNELR			16771200			2442360	45371800				4.0395e+06			1.14642e+06	9.24054e+06		2.54827e+06	7.00501e+06	4.0395e+06	3.75186e+06	1.2027e+07	1.14642e+06	9.24054e+06	1.63676e+06
Actin, alpha cardiac muscle 1 OS=Mus musculus GN=Actc1 PE=1 SV=1	LDLAGR			202851570			182533100	65654300				4.88587e+07			8.56795e+07	1.33713e+07		4.06923e+07	1.30105e+08	4.88587e+07	3.05668e+07	4.37498e+07	8.56795e+07	1.33713e+07	2.80563e+07
Actin, alpha cardiac muscle 1 OS=Mus musculus GN=Actc1 PE=1 SV=1	LDLAGRDLTDYLMK			22237018			40131900	5734830				5.35599e+06			1.88376e+07	1.16797e+06		8.70982e+06	2.78474e+07	5.35599e+06	2.97781e+06	3.7822e+06	1.88376e+07	1.16797e+06	1.21698e+07
Actin, alpha cardiac muscle 1 OS=Mus musculus GN=Actc1 PE=1 SV=1	LDLAGRDLTDYLMKILTER			12319100				9039480				2.96717e+06				1.841e+06		2.05343e+06	1.77986e+06	2.96717e+06	1.74083e+06	4.35796e+06	139812	1.841e+06	1.02173e+07
Actin, alpha cardiac muscle 1 OS=Mus musculus GN=Actc1 PE=1 SV=1	MQKEITALAPSTMK			24994536			6608720	11642900				6.02017e+06			3.10208e+06	2.37122e+06		7.53032e+06	3.64512e+06	6.02017e+06	6.68897e+06	2.3103e+06	3.10208e+06	2.37122e+06	3.20852e+06
Actin, alpha cardiac muscle 1 OS=Mus musculus GN=Actc1 PE=1 SV=1	MQKEITALAPSTMKIK						5331340								2.50249e+06							1.45735e+06	2.50249e+06	1.2664e+07	768454
Actin, alpha cardiac muscle 1 OS=Mus musculus GN=Actc1 PE=1 SV=1	RGILTLK			14531200			39326900					3.49998e+06			1.84597e+07			2.49263e+06	7.46396e+06	3.49998e+06	4.38915e+06	5.61334e+07	1.84597e+07	1.46402e+07	9.0722e+07
Actin, alpha cardiac muscle 1 OS=Mus musculus GN=Actc1 PE=1 SV=1	SYELPDGQVITIGNER			2378746050		13181900	1106521490	2097476260				5.72943e+08		3.63811e+07	5.19392e+08	4.27177e+08		1.39367e+09	9.3519e+08	5.72943e+08	1.27679e+09	3.63811e+07	5.19392e+08	4.27177e+08	5.89879e+07
Actin, alpha cardiac muscle 1 OS=Mus musculus GN=Actc1 PE=1 SV=1	SYELPDGQVITIGNERFR			1920820			98325500					462648			4.61531e+07			602650	5.59906e+06	462648	1.23967e+06	4.00476e+07	4.61531e+07	3.93732e+07	7.3814e+07
Actin, cytoplasmic 2 OS=Mus musculus GN=Actg1 PE=1 SV=1	AGFAGDDAPR		1010920840	1602333900		78393800	1694558020	1696768600			1.01092e+09	3.85937e+08		2.16361e+08	7.95411e+08	3.45568e+08		1.88285e+09	1.01092e+09	3.85937e+08	6.37216e+08	2.16361e+08	7.95411e+08	3.45568e+08	4.36868e+08
Actin, cytoplasmic 2 OS=Mus musculus GN=Actg1 PE=1 SV=1	AGFAGDDAPRAVFPSIVGRPR			70155410			13717400	160492606				1.68976e+07			6.43883e+06	3.26863e+07		8.30433e+06	1.04347e+07	1.68976e+07	4.44998e+06	2.55273e+06	6.43883e+06	3.26863e+07	1.82682e+07
Actin, cytoplasmic 2 OS=Mus musculus GN=Actg1 PE=1 SV=1	AVFPSIVGRPR		590653000	1494402221			1366140000	2.83552e+09			5.90653e+08	3.59941e+08			6.41254e+08	5.77489e+08		5.50959e+08	5.90653e+08	3.59941e+08	2.43676e+08	8.24009e+08	6.41254e+08	5.77489e+08	8.5352e+08
Actin, cytoplasmic 2 OS=Mus musculus GN=Actg1 PE=1 SV=1	CDVDIR		142186000	74839770			140979000	91411905			1.42186e+08	1.80259e+07			6.61743e+07	1.86172e+07		2.50813e+08	1.42186e+08	1.80259e+07	2.27616e+08	4.51099e+07	6.61743e+07	1.86172e+07	8.64189e+07
Actin, cytoplasmic 2 OS=Mus musculus GN=Actg1 PE=1 SV=1	CDVDIRK			13418000			47391700					3.23185e+06			2.22453e+07			2.66133e+06	1.73549e+06	3.23185e+06	5.25046e+06	1.265e+07	2.22453e+07	6.14585e+07	3.06668e+06
Actin, cytoplasmic 2 OS=Mus musculus GN=Actg1 PE=1 SV=1	CDVDIRKDLYANTVLSGGTTMYPGIADR		36244400	12796730			36586600	12830320			36244401	3.08221e+06			1.71734e+07	2.61306e+06		3.82393e+07	36244401	3.08221e+06	3.99035e+06	715321	1.71734e+07	2.61306e+06	7.63066e+06
Actin, cytoplasmic 2 OS=Mus musculus GN=Actg1 PE=1 SV=1	CPEALFQPSFLGMESCGIHETTFNSIMK		2903040	3997340			2913620				2.90304e+06	962797			1.36763e+06			6.00674e+06	2.90304e+06	962797	2.64717e+06	2.09057e+06	1.36763e+06	5.08888e+06	5.25869e+06
Actin, cytoplasmic 2 OS=Mus musculus GN=Actg1 PE=1 SV=1	DIKEKLCYVALDFEQEMATAASSSSLEK		292133	32598900			2208010	91273020			292134	7.85175e+06			1.03642e+06	1.85889e+07		1.51076e+06	292134	7.85175e+06	2.20776e+06	1.18196e+07	1.03642e+06	1.85889e+07	2.0935e+06
Actin, cytoplasmic 2 OS=Mus musculus GN=Actg1 PE=1 SV=1	DIKEKLCYVALDFEQEMATAASSSSLEKSYELPDGQVITIGNER			1813910				63956200				436897				1.30255e+07		579004	340234	436897	343323	8.49058e+06	5.4317e+06	1.30255e+07	2.07379e+07
Actin, cytoplasmic 2 OS=Mus musculus GN=Actg1 PE=1 SV=1	DLTDYLMK						50107900								2.35202e+07							2.51565e+07	2.35202e+07	6.38261e+06	1.22621e+07
Actin, cytoplasmic 2 OS=Mus musculus GN=Actg1 PE=1 SV=1	DLTDYLMKILTER		1148090	2840600			2295110	8340643			1.14809e+06	684185			1.07731e+06	1.69868e+06		924923	1.14809e+06	684185	686365	695947	1.07731e+06	1.69868e+06	1.15132e+06
Actin, cytoplasmic 2 OS=Mus musculus GN=Actg1 PE=1 SV=1	DLTDYLMKILTERGYSFTTTAER							5540880								1.12847e+06						986820	2.88154e+06	1.12847e+06	1.62558e+06
Actin, cytoplasmic 2 OS=Mus musculus GN=Actg1 PE=1 SV=1	DLYANTVLSGGTTMYPGIADR		193978000	48113075		406959	255279155	61776530			193978001	1.15885e+07		1.12318e+06	1.19826e+08	1.25816e+07		3.62957e+07	193978001	1.15885e+07	1.71972e+07	1.12318e+06	1.19826e+08	1.25816e+07	8.31648e+06
Actin, cytoplasmic 2 OS=Mus musculus GN=Actg1 PE=1 SV=1	DLYANTVLSGGTTMYPGIADRMQK		21601400	1650000			16239200	850759			2.16014e+07	397418			7.62254e+06	173268		1.17347e+07	2.16014e+07	397418	1.39384e+07	2.72596e+06	7.62254e+06	173268	1.96385e+06
Actin, cytoplasmic 2 OS=Mus musculus GN=Actg1 PE=1 SV=1	DSYVGDEAQSK		129039745	456472214		9062590	154574370	327969999			129039746	1.09946e+08		2.50121e+07	7.25559e+07	6.67952e+07		1.7049e+08	129039746	1.09946e+08	2.38993e+07	2.50121e+07	7.25559e+07	6.67952e+07	5.56052e+07
Actin, cytoplasmic 2 OS=Mus musculus GN=Actg1 PE=1 SV=1	DSYVGDEAQSKR		195151835	214768700		10934800	238369613	161969700			1.95152e+08	5.1729e+07		3.01793e+07	1.11889e+08	3.29872e+07		3.93061e+07	1.95152e+08	5.1729e+07	3.37142e+07	3.01793e+07	1.11889e+08	3.29872e+07	3.57663e+07
Actin, cytoplasmic 2 OS=Mus musculus GN=Actg1 PE=1 SV=1	EEEIAALVIDNGSGMCK		81881.7	18773313			143333000	44003600			81882.7	4.52173e+06			6.72793e+07	8.96189e+06		1.06829e+06	81882.7	4.52173e+06	592929	4.3408e+07	6.72793e+07	8.96189e+06	2.94663e+07
Actin, cytoplasmic 2 OS=Mus musculus GN=Actg1 PE=1 SV=1	EEEIAALVIDNGSGMCKAGFAGDDAPR		86731400	13058285		1054010	127185000	48778357			8.67314e+07	3.14521e+06		2.90899e+06	5.96995e+07	9.93433e+06		8.08319e+06	8.67314e+07	3.14521e+06	1.21565e+07	2.90899e+06	5.96995e+07	9.93433e+06	6.73054e+07
Actin, cytoplasmic 2 OS=Mus musculus GN=Actg1 PE=1 SV=1	EITALAPSTMK		461598000	133836620			537180390	264462600			4.61598e+08	3.22358e+07			2.52148e+08	5.38611e+07		2.0424e+08	4.61598e+08	3.22358e+07	2.14709e+07	6.85302e+07	2.52148e+08	5.38611e+07	6.07012e+07
Actin, cytoplasmic 2 OS=Mus musculus GN=Actg1 PE=1 SV=1	EITALAPSTMKIK		29342300	53417920			1780106	47756550			2.93423e+07	1.28662e+07			835567	9.72622e+06		4.89507e+07	2.93423e+07	1.28662e+07	5.4988e+06	7.66317e+06	835567	9.72622e+06	3.10672e+06
Actin, cytoplasmic 2 OS=Mus musculus GN=Actg1 PE=1 SV=1	EITALAPSTMKIKIIAPPER			1545330				4913620				372207				1.00072e+06		642609	249999	372207	1.05386e+06	287580	2.25884e+06	1.00072e+06	212723
Actin, cytoplasmic 2 OS=Mus musculus GN=Actg1 PE=1 SV=1	EIVRDIKEK			148191000				118575100				3.56932e+07				2.41493e+07		1.09419e+07	6.58999e+07	3.56932e+07	1.24554e+08	9.13594e+06	1.21567e+07	2.41493e+07	2.37754e+07
Actin, cytoplasmic 2 OS=Mus musculus GN=Actg1 PE=1 SV=1	EIVRDIKEKLCYVALDFEQEMATAASSSSLEK							3295260								671121						860633	1.68186e+06	671121	409387
Actin, cytoplasmic 2 OS=Mus musculus GN=Actg1 PE=1 SV=1	EKLCYVALDFEQEMATAASSSSLEK		2013070	9015922			6489460	12329676			2.01307e+06	2.17157e+06			3.0461e+06	2.51109e+06		3.25127e+06	2.01307e+06	2.17157e+06	3.43858e+06	1.34042e+06	3.0461e+06	2.51109e+06	3.45021e+06
Actin, cytoplasmic 2 OS=Mus musculus GN=Actg1 PE=1 SV=1	FRCPEALFQPSFLGMESCGIHETTFNSIMK			3408160								820887						1.66851e+06	1.66551e+06	820887	545866
Actin, cytoplasmic 2 OS=Mus musculus GN=Actg1 PE=1 SV=1	GILTLK			123880000				25631900				2.98377e+07				5.22026e+06		5.26335e+07	9.7279e+06	2.98377e+07	6.29234e+07	3.06436e+06	3.34612e+06	5.22026e+06	9.75176e+06
Actin, cytoplasmic 2 OS=Mus musculus GN=Actg1 PE=1 SV=1	GYSFTTTAER		5268928	456389810		16567900	424489050	670403230			5268929	1.09926e+08		4.57262e+07	1.99251e+08	1.36536e+08		7.92272e+07	5268929	1.09926e+08	5.01181e+07	4.57262e+07	1.99251e+08	1.36536e+08	2.12105e+07
Actin, cytoplasmic 2 OS=Mus musculus GN=Actg1 PE=1 SV=1	HQGVMVGMGQK		135196000	550910			111633000				135196001	132692			5.23996e+07			5.55762e+06	135196001	132692	4.48908e+06	5.97766e+06	5.23996e+07	6.31358e+07	3.99355e+07
Actin, cytoplasmic 2 OS=Mus musculus GN=Actg1 PE=1 SV=1	HQGVMVGMGQKDSYVGDEAQSK		195114000	21545870			128933000	8213694			1.95114e+08	5.18952e+06			6.052e+07	1.67282e+06		7.45246e+07	1.95114e+08	5.18952e+06	4.08733e+07	8.31164e+06	6.052e+07	1.67282e+06	4.03978e+06
Actin, cytoplasmic 2 OS=Mus musculus GN=Actg1 PE=1 SV=1	HQGVMVGMGQKDSYVGDEAQSKR		221154000	48493170			206758973	21764810			221154001	1.168e+07			9.70509e+07	4.43268e+06		9.70911e+07	221154001	1.168e+07	4.78337e+07	2.4845e+07	9.70509e+07	4.43268e+06	6.43539e+06
Actin, cytoplasmic 2 OS=Mus musculus GN=Actg1 PE=1 SV=1	IIAPPER		609355000	716902700		32167400	987467000	774680000			6.09355e+08	1.72673e+08		8.87797e+07	4.63508e+08	1.57773e+08		3.33958e+08	6.09355e+08	1.72673e+08	3.63498e+09	8.87797e+07	4.63508e+08	1.57773e+08	1.27789e+08
Actin, cytoplasmic 2 OS=Mus musculus GN=Actg1 PE=1 SV=1	IIAPPERK		942106900	918085000		26120200	919455790	1091137160			9.42107e+08	2.21129e+08		7.20899e+07	4.31585e+08	2.22224e+08		2.21883e+08	9.42107e+08	2.21129e+08	2.48778e+08	7.20899e+07	4.31585e+08	2.22224e+08	1.15383e+08
Actin, cytoplasmic 2 OS=Mus musculus GN=Actg1 PE=1 SV=1	IKIIAPPER		144492000	215996650		1390360	189232420	540959750			1.44492e+08	5.20248e+07		3.8373e+06	8.88241e+07	1.10173e+08		8.75532e+07	1.44492e+08	5.20248e+07	1.06199e+08	3.8373e+06	8.88241e+07	1.10173e+08	1.8593e+07
Actin, cytoplasmic 2 OS=Mus musculus GN=Actg1 PE=1 SV=1	IKIIAPPERK		77509700	76019774			147039641	418174700			7.75097e+07	1.83101e+07			6.90191e+07	8.51665e+07		4.4537e+06	7.75097e+07	1.83101e+07	2.45567e+07	1.27e+08	6.90191e+07	8.51665e+07	2.90263e+07
Actin, cytoplasmic 2 OS=Mus musculus GN=Actg1 PE=1 SV=1	ILTERGYSFTTTAER		225256000	233866070			169246000	441060200			2.25256e+08	5.63288e+07			7.94426e+07	8.98275e+07		4.2164e+07	2.25256e+08	5.63288e+07	2.17923e+08	4.03615e+08	7.94426e+07	8.98275e+07	1.2295e+08
Actin, cytoplasmic 2 OS=Mus musculus GN=Actg1 PE=1 SV=1	ILTERGYSFTTTAEREIVR		16126100	12979800				34111100			1.61261e+07	3.12631e+06				6.94716e+06		1.0677e+07	1.61261e+07	3.12631e+06	1.5553e+07	2.70645e+06	1.3296e+07	6.94716e+06	2.73767e+06
Actin, cytoplasmic 2 OS=Mus musculus GN=Actg1 PE=1 SV=1	IWHHTFYNELR		14769300	16771200			2442360	62353200			1.47693e+07	4.0395e+06			1.14642e+06	1.2699e+07		5.61971e+06	1.47693e+07	4.0395e+06	9.7239e+06	1.16352e+06	1.14642e+06	1.2699e+07	9.6469e+06
Actin, cytoplasmic 2 OS=Mus musculus GN=Actg1 PE=1 SV=1	KDLYANTVLSGGTTMYPGIADR		146145000	41482550			187866000	98078340			1.46145e+08	9.99146e+06			8.81827e+07	1.99749e+07		7.56613e+07	1.46145e+08	9.99146e+06	4.01674e+07	2.10001e+07	8.81827e+07	1.99749e+07	3.89948e+07
Actin, cytoplasmic 2 OS=Mus musculus GN=Actg1 PE=1 SV=1	KDLYANTVLSGGTTMYPGIADRMQK		14707100				5969320				1.47071e+07				2.80195e+06			2.72293e+07	1.47071e+07	5.9688e+07	4.73721e+06	1.0708e+06	2.80195e+06	8.20245e+06	5.26989e+06
Actin, cytoplasmic 2 OS=Mus musculus GN=Actg1 PE=1 SV=1	LCYVALDFEQEMATAASSSSLEK		960319	32690795			857470	62448383			960320	7.87388e+06			402489	1.27184e+07		5.95315e+06	960320	7.87388e+06	2.48905e+06	1.62675e+06	402489	1.27184e+07	9.11934e+06
Actin, cytoplasmic 2 OS=Mus musculus GN=Actg1 PE=1 SV=1	LCYVALDFEQEMATAASSSSLEKSYELPDGQVITIGNER			8779390				22690803				2.1146e+06				4.62127e+06		2.74105e+06	1.06656e+06	2.1146e+06	2.99346e+06	1.89102e+07	6.6897e+06	4.62127e+06	2.36028e+06
Actin, cytoplasmic 2 OS=Mus musculus GN=Actg1 PE=1 SV=1	LDLAGR			202851570			182533100	65654300				4.88587e+07			8.56795e+07	1.33713e+07		2.92444e+07	2.80658e+07	4.88587e+07	2.66396e+08	2.07484e+07	8.56795e+07	1.33713e+07	3.30763e+07
Actin, cytoplasmic 2 OS=Mus musculus GN=Actg1 PE=1 SV=1	LDLAGRDLTDYLMK		121566	22237018			40131900	24214230			121567	5.35599e+06			1.88376e+07	4.93153e+06		490598	121567	5.35599e+06	2.96606e+06	7.3971e+07	1.88376e+07	4.93153e+06	4.73141e+07
Actin, cytoplasmic 2 OS=Mus musculus GN=Actg1 PE=1 SV=1	LDLAGRDLTDYLMKILTER			12319100				9039480				2.96717e+06				1.841e+06		1.84444e+06	321381	2.96717e+06	1.16071e+06	882874	1.26622e+06	1.841e+06	6.40518e+06
Actin, cytoplasmic 2 OS=Mus musculus GN=Actg1 PE=1 SV=1	LDLAGRDLTDYLMKILTERGYSFTTTAER			295410				18705400				71152.5				3.80959e+06		217795	133136	71152.5	58380.3	674184	3.81303e+06	3.80959e+06	6.03947e+06
Actin, cytoplasmic 2 OS=Mus musculus GN=Actg1 PE=1 SV=1	MQKEITALAPSTMK		43536700	24994536			6608720	13552121			4.35367e+07	6.02017e+06			3.10208e+06	2.76006e+06		1.90309e+07	4.35367e+07	6.02017e+06	2.00685e+07	1.37702e+07	3.10208e+06	2.76006e+06	1.32308e+06
Actin, cytoplasmic 2 OS=Mus musculus GN=Actg1 PE=1 SV=1	MQKEITALAPSTMKIK		1011130				5331340				1.01113e+06				2.50249e+06			2.23551e+06	1.01113e+06	703169	3.49664e+06	1.6021e+07	2.50249e+06	1.68417e+06	3.22551e+06
Actin, cytoplasmic 2 OS=Mus musculus GN=Actg1 PE=1 SV=1	QEYDESGPSIVHR		161372000	142483410		5117000	165516529	182200200			161372001	3.43185e+07		1.41226e+07	7.7692e+07	3.71074e+07		9.96571e+07	161372001	3.43185e+07	3.15075e+07	1.41226e+07	7.7692e+07	3.71074e+07	5.81398e+07
Actin, cytoplasmic 2 OS=Mus musculus GN=Actg1 PE=1 SV=1	QEYDESGPSIVHRK		7237240	11387102			32184300	2788568			7.23724e+06	2.74269e+06			1.5107e+07	567927		9.5639e+06	7.23724e+06	2.74269e+06	2.63277e+06	973259	1.5107e+07	567927	2.10197e+06
Actin, cytoplasmic 2 OS=Mus musculus GN=Actg1 PE=1 SV=1	RGILTLK			14531200			39326900					3.49998e+06			1.84597e+07			7.98396e+06	2.77929e+07	3.49998e+06	7.8284e+06	2.80425e+07	1.84597e+07	6.77829e+07	2.19468e+07
Actin, cytoplasmic 2 OS=Mus musculus GN=Actg1 PE=1 SV=1	SYELPDGQVITIGNER		660802310	2378746050		13181900	1106521490	3372075110			6.60802e+08	5.72943e+08		3.63811e+07	5.19392e+08	6.86766e+08		1.99e+09	6.60802e+08	5.72943e+08	2.13734e+08	3.63811e+07	5.19392e+08	6.86766e+08	8.86588e+08
Actin, cytoplasmic 2 OS=Mus musculus GN=Actg1 PE=1 SV=1	SYELPDGQVITIGNERFR		8323520	1920820			98325500	235322000			8323521	462648			4.61531e+07	4.79263e+07		1.214e+06	8323521	462648	3.71888e+06	4.04307e+07	4.61531e+07	4.79263e+07	1.64925e+07
Actin, cytoplasmic 2 OS=Mus musculus GN=Actg1 PE=1 SV=1	TTGIVMDSGDGVTHTVPIYEGYALPHAILR		840603000	177853800			550963000	236582830			8.40603e+08	4.28377e+07			2.58617e+08	4.81831e+07		2.398e+08	8.40603e+08	4.28377e+07	3.17675e+08	1.08017e+08	2.58617e+08	4.81831e+07	2.47088e+07
Actin, cytoplasmic 2 OS=Mus musculus GN=Actg1 PE=1 SV=1	VAPEEHPVLLTEAPLNPK		88206200	2056419240		27179800	1975560000	4301528019			8.82062e+07	4.95308e+08		7.50143e+07	9.27311e+08	8.7606e+08		1.55099e+08	8.82062e+07	4.95308e+08	2.31844e+08	7.50143e+07	9.27311e+08	8.7606e+08	9.26421e+07
Actin, cytoplasmic 2 OS=Mus musculus GN=Actg1 PE=1 SV=1	VAPEEHPVLLTEAPLNPKANR		88552900	142317919			145683000	253178321			8.85529e+07	3.42786e+07			6.83823e+07	5.1563e+07		1.48112e+07	8.85529e+07	3.42786e+07	1.20326e+08	4.12915e+07	6.83823e+07	5.1563e+07	1.11583e+08
Actin, cytoplasmic 2 OS=Mus musculus GN=Actg1 PE=1 SV=1	VAPEEHPVLLTEAPLNPKANREK		3127820	290225073			55807700	44877200			3.12782e+06	6.99034e+07			2.61957e+07	9.13981e+06		9.00518e+07	3.12782e+06	6.99034e+07	2.29605e+07	4.82446e+07	2.61957e+07	9.13981e+06	3.76835e+07
Actin-binding LIM protein 1 OS=Mus musculus GN=Ablim1 PE=1 SV=1	AIYDIERPDLITYEPFYTSGYEDKQERQSLGESPR							7907170								1.6104e+06						6.16033e+06	1.17598e+06	1.6104e+06	3.20193e+06
Actin-binding LIM protein 1 OS=Mus musculus GN=Ablim1 PE=1 SV=1	HSYTPTTSR		521412	647930							521413	156060						134491	521413	156060	231795
Actin-binding LIM protein 1 OS=Mus musculus GN=Ablim1 PE=1 SV=1	QSLGESPR		864889				510159	1557754			864890				239465	317256		399799	864890	1.79999e+06	973065	145731	239465	317256	37654.6
Actin-binding LIM protein 1 OS=Mus musculus GN=Ablim1 PE=1 SV=1	STSQGSINSPVYSR		1427120	5718676			3341370	6689990			1.42712e+06	1.3774e+06			1.56841e+06	1.3625e+06		1.64372e+06	1.42712e+06	1.3774e+06	4.3888e+06	1.94632e+06	1.56841e+06	1.3625e+06	1.57104e+06
Actin-binding LIM protein 1 OS=Mus musculus GN=Ablim1 PE=1 SV=1	TSSESIYSRPGSSIPGSPGHTIYAK							1966560								400515						271915	212610	400515	1.00202e+06
Actin-binding LIM protein 1 OS=Mus musculus GN=Ablim1 PE=1 SV=1	TSSLPGYGK							1239490								252438						1.67743e+06	511601	252438	74553.2
Actin-binding LIM protein 1 OS=Mus musculus GN=Ablim1 PE=1 SV=1	VDNEILDYKDLAAIPK							3475070								707742						2.16248e+06	927759	707742	286971
Actin-binding LIM protein 1 OS=Mus musculus GN=Ablim1 PE=1 SV=1	VDNEILDYKDLAAIPKVK							546111								111223						55767	319171	111223	33601.4
Actin-like protein 6A OS=Mus musculus GN=Actl6a PE=1 SV=2	LIANNTTVER		901765				1956280				901766				918261			2.98527e+06	901766	1.01542e+06	322217	1.93578e+06	918261	715982	1.54363e+06
Actin-like protein 6A OS=Mus musculus GN=Actl6a PE=1 SV=2	LKLIANNTTVER						628601								295060							145441	295060	87301.6	136322
Actin-like protein 6A OS=Mus musculus GN=Actl6a PE=1 SV=2	QGGPTYYIDTNALR						1760810								826509							254781	826509	432606	606232
Actin-like protein 6A OS=Mus musculus GN=Actl6a PE=1 SV=2	QGGPTYYIDTNALRVPR		1256720								1.25672e+06							401280	1.25672e+06	612153	84870.4
Actin-like protein 6A OS=Mus musculus GN=Actl6a PE=1 SV=2	SGGVYGGDEVGALVFDIGSYTVR		402694				339115				402695				159178			698953	402695	2.30008e+06	286997	159828	159178	180416	197410
Actin-like protein 6A OS=Mus musculus GN=Actl6a PE=1 SV=2	SPLAGDFITMQCR		613426				1544070				613427				724774			2.11005e+06	613427	251459	955866	2.85565e+06	724774	208395	1.63434e+06
Actin-like protein 6A OS=Mus musculus GN=Actl6a PE=1 SV=2	STGLILDSGATHTTAIPVHDGYVLQQGIVK						3196660								1.50048e+06							7.20578e+06	1.50048e+06	3.07507e+06	856793
Actin-like protein 6A OS=Mus musculus GN=Actl6a PE=1 SV=2	TAVLTAFANGR		823487				1044760				823488				490402			1.23221e+06	823488	1.86538e+06	768033	574741	490402	677757	309189
Actin-related protein 2 OS=Mus musculus GN=Actr2 PE=1 SV=1	CGYAGSNFPEHIFPALVGRPIIR			420631				21070900				101313				4.29135e+06		374370	182171	101313	50948.2	1.72927e+07	4.97441e+06	4.29135e+06	6.07035e+06
Actin-related protein 2 OS=Mus musculus GN=Actr2 PE=1 SV=1	DLMVGDEASELR		451586	719452			244767	804345			451587	173287			114892	163815		361579	451587	173287	231878	289479	114892	163815	279751
Actin-related protein 2 OS=Mus musculus GN=Actr2 PE=1 SV=1	ELKQLYLER			1136710								273787						220765	88112.8	273787	710343
Actin-related protein 2 OS=Mus musculus GN=Actr2 PE=1 SV=1	GVRVLEKLGVTVR			2834690								682762						1.61621e+06	51851.3	682762	3.78922e+06
Actin-related protein 2 OS=Mus musculus GN=Actr2 PE=1 SV=1	GYAFNHSADFETVR			8359850			791349	8652420				2.01355e+06			371453	1.76217e+06		1.71521e+06	1.77287e+06	2.01355e+06	2.38207e+06	5.12752e+06	371453	1.76217e+06	3.42186e+06
Actin-related protein 2 OS=Mus musculus GN=Actr2 PE=1 SV=1	IEDPPR		1074010								1.07401e+06							625461	1.07401e+06	5.43511e+06	329804
Actin-related protein 2 OS=Mus musculus GN=Actr2 PE=1 SV=1	ILLTEPPMNPTK			83021.8				992867				19996.8				202210		60807.6	15311.1	19996.8	98276.2	66115.3	711764	202210	43905.3
Actin-related protein 2 OS=Mus musculus GN=Actr2 PE=1 SV=1	IRIEDPPR						1487120								698042							803906	698042	385057	3.65526e+06
Actin-related protein 2 OS=Mus musculus GN=Actr2 PE=1 SV=1	KVVVCDNGTGFVK			5405472				8334680				1.30196e+06				1.69746e+06		751573	2.65803e+06	1.30196e+06	382854	5.37793e+06	570815	1.69746e+06	1.86794e+06
Actin-related protein 2 OS=Mus musculus GN=Actr2 PE=1 SV=1	LALETTVLVESYTLPDGR			4208601				4556580				1.01368e+06				928005		879583	2.7529e+06	1.01368e+06	1.62121e+06	579128	707980	928005	328161
Actin-related protein 2 OS=Mus musculus GN=Actr2 PE=1 SV=1	LCYVGYNIEQEQK			2113835				3261107				509137				664166		598168	529929	509137	569837	452757	1.20059e+06	664166	2.30989e+06
Actin-related protein 2 OS=Mus musculus GN=Actr2 PE=1 SV=1	LDIAGR			202851570			3146100	65654300				4.88587e+07			1.47675e+06	1.33713e+07		8.59726e+06	3.33067e+07	4.88587e+07	6.15248e+07	2.72218e+06	1.47675e+06	1.33713e+07	1.07168e+07
Actin-related protein 2 OS=Mus musculus GN=Actr2 PE=1 SV=1	LNIDTR			1061270				778964				255617				158646		346127	129450	255617	358523	38784.4	49476.6	158646	196686
Actin-related protein 2 OS=Mus musculus GN=Actr2 PE=1 SV=1	RLDIAGR						3903510	1771390							1.83227e+06	360766						617878	1.83227e+06	360766	992426
Actin-related protein 2 OS=Mus musculus GN=Actr2 PE=1 SV=1	STTKVGNIEIK							262387								53438.6						22073.8	39984.3	53438.6	67900.4
Actin-related protein 2 OS=Mus musculus GN=Actr2 PE=1 SV=1	VGNIEIK			7864770				7919350				1.8943e+06				1.61288e+06		2.43455e+06	1.39092e+06	1.8943e+06	4.66398e+06	4.10602e+06	852340	1.61288e+06	5.64926e+06
Actin-related protein 2 OS=Mus musculus GN=Actr2 PE=1 SV=1	VGNIEIKDLMVGDEASELR			789570				2714461				190176				552834		108145	94613.5	190176	26217.2	489404	693912	552834	873833
Actin-related protein 2 OS=Mus musculus GN=Actr2 PE=1 SV=1	VLEKLGVTVR			57274750			2363820	49000050				1.37952e+07			1.10956e+06	9.97948e+06		1.47307e+06	2.92499e+06	1.37952e+07	1.5714e+07	4.63575e+06	1.10956e+06	9.97948e+06	6.96658e+06
Actin-related protein 2 OS=Mus musculus GN=Actr2 PE=1 SV=1	VLKGDVEK			1119040								269531						412008	287615	269531	1.03638e+06
Actin-related protein 2 OS=Mus musculus GN=Actr2 PE=1 SV=1	VLKGDVEKLSK		416113					2787280			416114					567665		1.12052e+06	416114	567763	198468	753616	233024	567665	466375
Actin-related protein 2 OS=Mus musculus GN=Actr2 PE=1 SV=1	VVVCDNGTGFVK		61793.8	1635740				3600435			61794.8	393983				733274		101709	61794.8	393983	248420	426119	341419	733274	436299
Actin-related protein 2/3 complex subunit 1A OS=Mus musculus GN=Arpc1a PE=1 SV=1	AATFVKWSPLENK			468524				1036930				112849				211184		120700	40694.4	112849	58833	1.20714e+06	826725	211184	387160
Actin-related protein 2/3 complex subunit 1A OS=Mus musculus GN=Arpc1a PE=1 SV=1	ATTEDRNTALETLHQNSITQVSIYEVDKQDCR							2090470								425751						1.14447e+06	367282	425751	936333
Actin-related protein 2/3 complex subunit 1A OS=Mus musculus GN=Arpc1a PE=1 SV=1	DGIWKPTLVILR							378927								77173.5						70748.1	16580.3	77173.5	101336
Actin-related protein 2/3 complex subunit 1A OS=Mus musculus GN=Arpc1a PE=1 SV=1	EVDEKPASTPWGSK			509408								122696						63122.1	239851	122696	104424
Actin-related protein 2/3 complex subunit 1A OS=Mus musculus GN=Arpc1a PE=1 SV=1	GCLTFVSK			2556400								615733						538444	1.57227e+06	615733	886974
Actin-related protein 2/3 complex subunit 1A OS=Mus musculus GN=Arpc1a PE=1 SV=1	IVTCGADR			1557250								375078						303357	1.24369e+06	375078	261708
Actin-related protein 2/3 complex subunit 1A OS=Mus musculus GN=Arpc1a PE=1 SV=1	LAWVSHDSTVSVADASK			10117500				24037400				2.43689e+06				4.89552e+06		5.78027e+06	2.90909e+06	2.43689e+06	4.16424e+06	3.36606e+06	4.80945e+06	4.89552e+06	6.04579e+06
Actin-related protein 2/3 complex subunit 1A OS=Mus musculus GN=Arpc1a PE=1 SV=1	QSIQR			4339920								1.04531e+06						1.35063e+06	213838	1.04531e+06	1.17446e+06
Actin-related protein 2/3 complex subunit 1A OS=Mus musculus GN=Arpc1a PE=1 SV=1	SLHQFLLEPITCHAWNR							1542770								314205						212372	83343.1	314205	192701
Actin-related protein 2/3 complex subunit 1A OS=Mus musculus GN=Arpc1a PE=1 SV=1	STVLSLDWHPNNVLLAAGSCDFK							4237620								863045						229129	2.91271e+06	863045	652687
Actin-related protein 2/3 complex subunit 1A OS=Mus musculus GN=Arpc1a PE=1 SV=1	SVQVSTLR			4124240				5466430				993362				1.11331e+06		1.78139e+06	1.67111e+06	993362	738418	2.11419e+06	1.03743e+06	1.11331e+06	314063
Actin-related protein 2/3 complex subunit 1A OS=Mus musculus GN=Arpc1a PE=1 SV=1	TLESSIQGLR			3146950			527126	5391740				757973			247429	1.0981e+06		1.33993e+06	203987	757973	909575	214908	247429	1.0981e+06	534792
Actin-related protein 2/3 complex subunit 1A OS=Mus musculus GN=Arpc1a PE=1 SV=1	VFSAYIKEVDEKPASTPWGSK							2475340								504134						606574	249399	504134	275042
Actin-related protein 2/3 complex subunit 1B OS=Mus musculus GN=Arpc1b PE=1 SV=4	ASSEGGAATGAGLDSLHK			23850933			271839	42555454				5.74472e+06			127599	8.66695e+06		1.26519e+07	705372	5.74472e+06	3.2238e+07	917021	127599	8.66695e+06	1.26162e+06
Actin-related protein 2/3 complex subunit 1B OS=Mus musculus GN=Arpc1b PE=1 SV=4	ASSEGGAATGAGLDSLHKNSVSQISVLSGGK			2531800				7121040				609808				1.45029e+06		358599	465382	609808	317633	729155	834550	1.45029e+06	1.86689e+06
Actin-related protein 2/3 complex subunit 1B OS=Mus musculus GN=Arpc1b PE=1 SV=4	ASSEGGAATGAGLDSLHKNSVSQISVLSGGKAK							1872370								381332						846942	84452.9	381332	258767
Actin-related protein 2/3 complex subunit 1B OS=Mus musculus GN=Arpc1b PE=1 SV=4	AYHSFLVEPISCHAWNK			512916				2660550				123541				541855		332090	196087	123541	134632	327412	789390	541855	210408
Actin-related protein 2/3 complex subunit 1B OS=Mus musculus GN=Arpc1b PE=1 SV=4	DLKIK			5063000								1.21947e+06						350443	2.75261e+06	1.21947e+06	259223
Actin-related protein 2/3 complex subunit 1B OS=Mus musculus GN=Arpc1b PE=1 SV=4	EHNGQVTGIDWAPESNR			184359								44404.8						16798.8	22353.2	44404.8	43717.3
Actin-related protein 2/3 complex subunit 1B OS=Mus musculus GN=Arpc1b PE=1 SV=4	FAVGSGSR							9285840								1.89118e+06						830626	648669	1.89118e+06	1.21806e+06
Actin-related protein 2/3 complex subunit 1B OS=Mus musculus GN=Arpc1b PE=1 SV=4	FQNLDKK			13648370								3.28734e+06						4.21562e+06	8.2382e+06	3.28734e+06	2.00529e+06
Actin-related protein 2/3 complex subunit 1B OS=Mus musculus GN=Arpc1b PE=1 SV=4	FQNLDKKASSEGGAATGAGLDSLHK			1464760				5961280				352801				1.21409e+06		170989	690043	352801	440121	1.11332e+06	913985	1.21409e+06	1.67032e+06
Actin-related protein 2/3 complex subunit 1B OS=Mus musculus GN=Arpc1b PE=1 SV=4	IFSAYIK			1101710			902532					265357			423641			155768	170091	265357	495704	587723	423641	349402	328642
Actin-related protein 2/3 complex subunit 1B OS=Mus musculus GN=Arpc1b PE=1 SV=4	IFSAYIKEVEERPAPTPWGSK			1305030				2746010				314329				559260		126718	252853	314329	61991.2	339060	1.99522e+06	559260	540285
Actin-related protein 2/3 complex subunit 1B OS=Mus musculus GN=Arpc1b PE=1 SV=4	IVTCGTDR			7399440								1.78222e+06						203313	832954	1.78222e+06	1.35829e+06
Actin-related protein 2/3 complex subunit 1B OS=Mus musculus GN=Arpc1b PE=1 SV=4	IVTCGTDRNAYVWTLK							4714790								960227						1.67211e+06	581991	960227	579152
Actin-related protein 2/3 complex subunit 1B OS=Mus musculus GN=Arpc1b PE=1 SV=4	KASSEGGAATGAGLDSLHK			602750				809763				145178				164919		119926	58105.9	145178	58288.8	119216	120101	164919	187093
Actin-related protein 2/3 complex subunit 1B OS=Mus musculus GN=Arpc1b PE=1 SV=4	NAYVWTLK							2855590								581577						1.46936e+06	529347	581577	1.12838e+06
Actin-related protein 2/3 complex subunit 1B OS=Mus musculus GN=Arpc1b PE=1 SV=4	NAYVWTLKGR			1408353				2071580				339215				421904		406333	1.95226e+06	339215	105249	246991	136709	421904	723895
Actin-related protein 2/3 complex subunit 1B OS=Mus musculus GN=Arpc1b PE=1 SV=4	NSVSQISVLSGGK		406484	10126396			286893	19344466			406485	2.43904e+06			134666	3.93974e+06		2.95469e+06	406485	2.43904e+06	682062	3.29034e+06	134666	3.93974e+06	1.61296e+06
Actin-related protein 2/3 complex subunit 1B OS=Mus musculus GN=Arpc1b PE=1 SV=4	NSVSQISVLSGGKAK			6864380				10265000				1.65335e+06				2.0906e+06		1.77199e+06	3.1083e+07	1.65335e+06	1.00138e+06	2.70175e+06	1.29157e+06	2.0906e+06	3.89968e+06
Actin-related protein 2/3 complex subunit 1B OS=Mus musculus GN=Arpc1b PE=1 SV=4	SLESALK			9448460								2.27575e+06						3.13622e+06	2.23346e+06	2.27575e+06	1.26356e+06
Actin-related protein 2/3 complex subunit 1B OS=Mus musculus GN=Arpc1b PE=1 SV=4	SLESALKDLKIK			2030330								489024						810053	1.22811e+06	489024	185141
Actin-related protein 2/3 complex subunit 1B OS=Mus musculus GN=Arpc1b PE=1 SV=4	STVLSLDWHPNNVLLAAGSCDFK			2443510				4237620				588542				863045		2.81199e+06	174092	588542	856596	4.42351e+06	772062	863045	586608
Actin-related protein 2/3 complex subunit 1B OS=Mus musculus GN=Arpc1b PE=1 SV=4	TWKPTLVILR			5701514				16463426				1.37326e+06				3.35298e+06		534991	2.62825e+06	1.37326e+06	541162	2.16895e+06	4.81649e+06	3.35298e+06	1.10195e+06
Actin-related protein 2/3 complex subunit 1B OS=Mus musculus GN=Arpc1b PE=1 SV=4	VAWVSHDSTVCLVDADK							1403340								285808						651026	53383.6	285808	216538
Actin-related protein 2/3 complex subunit 1B OS=Mus musculus GN=Arpc1b PE=1 SV=4	VAWVSHDSTVCLVDADKK			12337633				57944116				2.97163e+06				1.1801e+07		906178	6.06275e+06	2.97163e+06	7.51321e+06	8.57947e+06	3.77909e+06	1.1801e+07	6.70812e+06
Actin-related protein 2/3 complex subunit 1B OS=Mus musculus GN=Arpc1b PE=1 SV=4	VHELK			1950940								469902						235123	794624	469902	436597
Actin-related protein 2/3 complex subunit 1B OS=Mus musculus GN=Arpc1b PE=1 SV=4	WAPNENKFAVGSGSR			4333570				4802130				1.04378e+06				978014		398893	778846	1.04378e+06	1.96314e+06	361270	679885	978014	518817
Actin-related protein 2/3 complex subunit 2 OS=Mus musculus GN=Arpc2 PE=1 SV=3	AKTSDFLK			36557900				43889400				8.80531e+06				8.93863e+06		6.33098e+06	1.9827e+06	8.80531e+06	3.54907e+07	3.57408e+06	1.14533e+07	8.93863e+06	3.93646e+06
Actin-related protein 2/3 complex subunit 2 OS=Mus musculus GN=Arpc2 PE=1 SV=3	AKTSDFLKVLNR							5964490								1.21474e+06						940683	1.55044e+06	1.21474e+06	4.8241e+06
Actin-related protein 2/3 complex subunit 2 OS=Mus musculus GN=Arpc2 PE=1 SV=3	ARPDAEK			7892980								1.9011e+06						7.77929e+06	2.75201e+06	1.9011e+06	970973
Actin-related protein 2/3 complex subunit 2 OS=Mus musculus GN=Arpc2 PE=1 SV=3	ARPDAEKK			680373								163874						100454	40008	163874	160141
Actin-related protein 2/3 complex subunit 2 OS=Mus musculus GN=Arpc2 PE=1 SV=3	ARPDAEKKEMK			3080940								742073						5.69515e+06	696297	742073	3.64279e+06
Actin-related protein 2/3 complex subunit 2 OS=Mus musculus GN=Arpc2 PE=1 SV=3	ASHTAPQVLFSHR			9103230				8088050				2.1926e+06				1.64723e+06		1.05149e+06	1.50804e+06	2.1926e+06	7.62844e+06	559507	531144	1.64723e+06	2.65158e+06
Actin-related protein 2/3 complex subunit 2 OS=Mus musculus GN=Arpc2 PE=1 SV=3	ASHTAPQVLFSHREPPLELK							136568								27814						24852.8	178075	27814	112987
Actin-related protein 2/3 complex subunit 2 OS=Mus musculus GN=Arpc2 PE=1 SV=3	AVIHYR			7855650				6828830				1.89211e+06				1.39078e+06		334846	1.89381e+06	1.89211e+06	2.99962e+06	973083	646172	1.39078e+06	1.2619e+06
Actin-related protein 2/3 complex subunit 2 OS=Mus musculus GN=Arpc2 PE=1 SV=3	AYIHTR		2913960	77729500			4598980	4620540			2.91396e+06	1.87219e+07			2.15872e+06	941031		3.47594e+07	2.91396e+06	1.87219e+07	3.33977e+06	486204	2.15872e+06	941031	3.19452e+06
Actin-related protein 2/3 complex subunit 2 OS=Mus musculus GN=Arpc2 PE=1 SV=3	DDDDVVIGK			323445				121416				77905				24728.1		498749	38467.5	77905	100413	16506.9	7428.62	24728.1	29052.9
Actin-related protein 2/3 complex subunit 2 OS=Mus musculus GN=Arpc2 PE=1 SV=3	DNTINLIHTFR			1725280								415550						125528	1.56249e+06	415550	702285
Actin-related protein 2/3 complex subunit 2 OS=Mus musculus GN=Arpc2 PE=1 SV=3	DSIVHQAGMLK			3804040								916239						304440	1.00637e+06	916239	657505
Actin-related protein 2/3 complex subunit 2 OS=Mus musculus GN=Arpc2 PE=1 SV=3	DSIVHQAGMLKR		881811	13136700			762430	278658			881812	3.1641e+06			357878	56752.4		2.53749e+06	881812	3.1641e+06	1.98591e+06	230179	357878	56752.4	466263
Actin-related protein 2/3 complex subunit 2 OS=Mus musculus GN=Arpc2 PE=1 SV=3	DTDAAVGDNIGYITFVLFPR			2147380			1521730					517217			714287			47591.2	2.8715e+06	517217	1.95135e+06	1.08536e+06	714287	487012	423793
Actin-related protein 2/3 complex subunit 2 OS=Mus musculus GN=Arpc2 PE=1 SV=3	ELQAHGADELLK			4848760								1.16787e+06						1.00396e+06	168866	1.16787e+06	409538
Actin-related protein 2/3 complex subunit 2 OS=Mus musculus GN=Arpc2 PE=1 SV=3	ELQAHGADELLKR			10168600				4380940				2.4492e+06				892234		2.36996e+06	1.62122e+06	2.4492e+06	542127	157395	1.50017e+06	892234	1.01652e+06
Actin-related protein 2/3 complex subunit 2 OS=Mus musculus GN=Arpc2 PE=1 SV=3	FYKELQAHGADELLK			8286550								1.99589e+06						2.08978e+06	1.34756e+06	1.99589e+06	469870
Actin-related protein 2/3 complex subunit 2 OS=Mus musculus GN=Arpc2 PE=1 SV=3	FYKELQAHGADELLKR							3094090								630151						967188	321768	630151	694112
Actin-related protein 2/3 complex subunit 2 OS=Mus musculus GN=Arpc2 PE=1 SV=3	IIEETLALK						1635010								767460							2.7588e+06	767460	1.00769e+06	607550
Actin-related protein 2/3 complex subunit 2 OS=Mus musculus GN=Arpc2 PE=1 SV=3	IIEETLALKFENAAAGNKPEAVEVTFADFDGVLYHISNPNGDKTK			592803								142782						99287.4	589182	142782	268306
Actin-related protein 2/3 complex subunit 2 OS=Mus musculus GN=Arpc2 PE=1 SV=3	ILLEVNNR			1991420				1046030				479652				213037		1.49552e+06	475534	479652	1.16814e+06	752455	35291.4	213037	164144
Actin-related protein 2/3 complex subunit 2 OS=Mus musculus GN=Arpc2 PE=1 SV=3	MILLEVNNR		4768080	78161527			9149930	25687683			4.76808e+06	1.88259e+07			4.2949e+06	5.23162e+06		3.62428e+07	4.76808e+06	1.88259e+07	1.88378e+07	1.28151e+06	4.2949e+06	5.23162e+06	5.57781e+06
Actin-related protein 2/3 complex subunit 2 OS=Mus musculus GN=Arpc2 PE=1 SV=3	TITGKTFSSR		1861270	32348280			3755610	70332928			1.86127e+06	7.79139e+06			1.76285e+06	1.43242e+07		2.01344e+06	1.86127e+06	7.79139e+06	520241	1.51196e+06	1.76285e+06	1.43242e+07	2.46633e+06
Actin-related protein 2/3 complex subunit 2 OS=Mus musculus GN=Arpc2 PE=1 SV=3	TSDFLK		3679920	64954600							3.67992e+06	1.56449e+07						1.01023e+07	3.67992e+06	1.56449e+07	8.15447e+06
Actin-related protein 2/3 complex subunit 2 OS=Mus musculus GN=Arpc2 PE=1 SV=3	TSDFLKVLNR			2003070				18408850				482458				3.74919e+06		327547	256109	482458	1.20703e+06	993563	2.09158e+06	3.74919e+06	3.36801e+06
Actin-related protein 2/3 complex subunit 2 OS=Mus musculus GN=Arpc2 PE=1 SV=3	VFMQEFK			4178270								1.00638e+06						6.6873e+06	2.03956e+06	1.00638e+06	297216
Actin-related protein 2/3 complex subunit 2 OS=Mus musculus GN=Arpc2 PE=1 SV=3	VFMQEFKEGR			10288100				767887				2.47799e+06				156390		7.5714e+06	3.24832e+06	2.47799e+06	1.00476e+06	276382	79724.5	156390	127610
Actin-related protein 2/3 complex subunit 2 OS=Mus musculus GN=Arpc2 PE=1 SV=3	VYGSFLVNPEPGYNVSLLYDLENLPASK			431612				3341410				103958				680520		52124.6	298324	103958	31406.7	330458	2.08523e+06	680520	630045
Actin-related protein 2/3 complex subunit 2 OS=Mus musculus GN=Arpc2 PE=1 SV=3	YFQFQEEGK							12493900								2.54454e+06						1.68207e+06	5.53881e+06	2.54454e+06	5.659e+06
Actin-related protein 2/3 complex subunit 2 OS=Mus musculus GN=Arpc2 PE=1 SV=3	YFQFQEEGKEGENR		461328	35394120			1204060	48471100			461329	8.525e+06			565176	9.87175e+06		4.18063e+06	461329	8.525e+06	3.33371e+06	721750	565176	9.87175e+06	6.63313e+06
Actin-related protein 2/3 complex subunit 3 OS=Mus musculus GN=Arpc3 PE=1 SV=3	ANVFFK							350909								71467.2						14966.7	87322.6	71467.2	71645.1
Actin-related protein 2/3 complex subunit 3 OS=Mus musculus GN=Arpc3 PE=1 SV=3	DTDIVDEAIYYFK							84078.4								17123.8						8043.28	5628.02	17123.8	13928.3
Actin-related protein 2/3 complex subunit 4 OS=Mus musculus GN=Arpc4 PE=1 SV=3	ELLLQPVTISR		518900	3912178				2377834			518901	942285				484276		344674	518901	942285	323063	1.70868e+06	532643	484276	879649
Actin-related protein 2/3 complex subunit 4 OS=Mus musculus GN=Arpc4 PE=1 SV=3	HNKPEVEVR		956160				1264250				956161				593428			294748	956161	500467	701329	149648	593428	1.29761e+06	1.28851e+06
Actin-related protein 2/3 complex subunit 4 OS=Mus musculus GN=Arpc4 PE=1 SV=3	IVAEEFLK							972186								197998						148956	68889.5	197998	244632
Actin-related protein 2/3 complex subunit 4 OS=Mus musculus GN=Arpc4 PE=1 SV=3	IVAEEFLKNF			2120744				3766870				510801				767171		512887	820319	510801	633489	1.21376e+06	2.28418e+06	767171	1.61543e+06
Actin-related protein 2/3 complex subunit 4 OS=Mus musculus GN=Arpc4 PE=1 SV=3	VLIEGSINSVR			2380960			2556000	1832140				573477			1.19976e+06	373139		2.25953e+06	456665	573477	1.29317e+06	688774	1.19976e+06	373139	1.6483e+06
Actin-related protein 2/3 complex subunit 5 OS=Mus musculus GN=Arpc5 PE=2 SV=3	ALAAGGVGSIVR						2191500	8998930							1.02867e+06	1.83275e+06						2.28179e+06	1.02867e+06	1.83275e+06	3.35889e+06
Actin-related protein 2/3 complex subunit 5 OS=Mus musculus GN=Arpc5 PE=2 SV=3	SKNTVSSAR			26615435				38123148				6.41058e+06				7.76426e+06		3.07855e+07	7.52343e+06	6.41058e+06	3.66051e+06	2.10543e+06	2.22495e+07	7.76426e+06	1.99987e+06
Actin-related protein 2/3 complex subunit 5-like protein OS=Mus musculus GN=Arpc5l PE=1 SV=1	ALAVGGLGSIIR		213623	219789			477206	463684			213624	52938.5			223997	94435.3		124632	213624	52938.5	67047.5	139540	223997	94435.3	233754
Actin-related protein 2/3 complex subunit 5-like protein OS=Mus musculus GN=Arpc5l PE=1 SV=1	ARNTLSSR		412403	3288600							412404	792090						2.30312e+06	412404	792090	808478
Actin-related protein 3 OS=Mus musculus GN=Actr3 PE=1 SV=3	AGRLPACVVDCGTGYTK		3262960	27264597		288098	6276810	63073572			3.26296e+06	6.56693e+06		795132	2.94628e+06	1.28457e+07		9.76749e+06	3.26296e+06	6.56693e+06	9.43925e+06	795132	2.94628e+06	1.28457e+07	3.88278e+06
Actin-related protein 3 OS=Mus musculus GN=Actr3 PE=1 SV=3	AGRLPACVVDCGTGYTKLGYAGNTEPQFIIPSCIAIKESAK			2491760				14206330				600164				2.8933e+06		3.80366e+06	3.31336e+06	600164	2.53837e+06	2.82673e+06	1.18427e+06	2.8933e+06	3.63971e+06
Actin-related protein 3 OS=Mus musculus GN=Actr3 PE=1 SV=3	DITYFIQQLLR		1073720	1305520			142735	1519795			1073721	314447			66999	309526		189985	1073721	314447	126163	126133	66999	309526	120680
Actin-related protein 3 OS=Mus musculus GN=Actr3 PE=1 SV=3	DREVGIPPEQSLETAK		502773	4854260			636127	560066			502774	1.16919e+06			298593	114065		882986	502774	1.16919e+06	4.01482e+06	278772	298593	114065	734932
Actin-related protein 3 OS=Mus musculus GN=Actr3 PE=1 SV=3	DYEEIGPSICR		1547930	18587666			1915580	18671860			1.54793e+06	4.47701e+06			899157	3.80276e+06		8.34036e+06	1.54793e+06	4.47701e+06	2.89689e+06	868807	899157	3.80276e+06	434930
Actin-related protein 3 OS=Mus musculus GN=Actr3 PE=1 SV=3	EFSIDVGYER			8329360			2935840	14396270				2.0062e+06			1.37806e+06	2.93198e+06		1.25198e+06	1.53054e+06	2.0062e+06	709434	8.15732e+06	1.37806e+06	2.93198e+06	2.78301e+06
Actin-related protein 3 OS=Mus musculus GN=Actr3 PE=1 SV=3	GVDDLDFFIGDEAIEKPTYATK			460366								110884						75588.6	200440	110884	385641
Actin-related protein 3 OS=Mus musculus GN=Actr3 PE=1 SV=3	HNPVFGVMS		2893710				8371020	1125200			2.89371e+06				3.92928e+06	229161		1.77268e+06	2.89371e+06	1.38825e+06	6.97875e+06	777837	3.92928e+06	229161	1.54423e+06
Actin-related protein 3 OS=Mus musculus GN=Actr3 PE=1 SV=3	KDYEEIGPSICR			428909				2523130				103307				513867		25255.6	32218.1	103307	128078	547873	1.80816e+06	513867	701452
Actin-related protein 3 OS=Mus musculus GN=Actr3 PE=1 SV=3	LGYAGNTEPQFIIPSCIAIKESAK			2095950				5932180				504829				1.20816e+06		383653	519299	504829	616219	934419	532287	1.20816e+06	740994
Actin-related protein 3 OS=Mus musculus GN=Actr3 PE=1 SV=3	LGYAGNTEPQFIIPSCIAIKESAKVGDQAQR			1945360								468558						193546	350589	468558	595362
Actin-related protein 3 OS=Mus musculus GN=Actr3 PE=1 SV=3	LKLSEELSGGR		6353350	6574290			6469970	17782170			6.35335e+06	1.58348e+06			3.03695e+06	3.62156e+06		8.07473e+06	6.35335e+06	1.58348e+06	1.11096e+07	5.43707e+06	3.03695e+06	3.62156e+06	4.196e+06
Actin-related protein 3 OS=Mus musculus GN=Actr3 PE=1 SV=3	LSEELSGGR	142281	4239880	6150941		345187	4642480	13946564		739146	4.23988e+06	1.48151e+06		952694	2.17914e+06	2.84039e+06		739146	4.23988e+06	1.48151e+06	2.63692e+06	952694	2.17914e+06	2.84039e+06	1.01552e+06
Actin-related protein 3 OS=Mus musculus GN=Actr3 PE=1 SV=3	NIVLSGGSTMFR		2802660				2626030				2802661				1.23264e+06			3.90447e+06	2802661	4.34635e+06	5.86762e+06	2.70471e+06	1.23264e+06	1.94453e+06	1.05533e+06
Actin-related protein 3 OS=Mus musculus GN=Actr3 PE=1 SV=3	NIVLSGGSTMFRDFGR		1385550								1.38555e+06							1.83942e+06	1.38555e+06	2.00669e+06	1.13832e+06
Actin-related protein 3 OS=Mus musculus GN=Actr3 PE=1 SV=3	QYTGVNAISKK		379153	98720.8			3332430				379154	23778.1			1.56421e+06			55177.3	379154	23778.1	56495.5	1.03305e+07	1.56421e+06	3.08313e+06	2.62871e+06
Actin-related protein 3 OS=Mus musculus GN=Actr3 PE=1 SV=3	RPLYK		11046600								1.10466e+07							6.31432e+07	1.10466e+07	8.79322e+06	2.02515e+07
Actin-related protein 3 OS=Mus musculus GN=Actr3 PE=1 SV=3	TLTGTVIDSGDGVTHVIPVAEGYVIGSCIK		2319780	6904722			562627	11426950			2319781	1.66307e+06			264093	2.32724e+06		5.27991e+06	2319781	1.66307e+06	4.31969e+06	310419	264093	2.32724e+06	1.61351e+06
Actin-related protein 3 OS=Mus musculus GN=Actr3 PE=1 SV=3	TVDARLKLSEELSGGR			681671								164187						150517	35274.7	164187	215592
Actin-related protein 3 OS=Mus musculus GN=Actr3 PE=1 SV=3	YSYVCPDLVK		2144250	5497600			2780960	8638430			2.14425e+06	1.32415e+06			1.30536e+06	1.75933e+06		1.15859e+06	2.14425e+06	1.32415e+06	2.08094e+06	957900	1.30536e+06	1.75933e+06	3.14122e+06
Activity-dependent neuroprotector homeobox protein OS=Mus musculus GN=Adnp PE=2 SV=1	ISSLASGNVR						559829								262779							594839	262779	133966	92789
Activity-dependent neuroprotector homeobox protein OS=Mus musculus GN=Adnp PE=2 SV=1	SPSVSQSQASR						396481								186105							33879.2	186105	959682	279993
Activity-dependent neuroprotector homeobox protein OS=Mus musculus GN=Adnp PE=2 SV=1	SVGQSYGVGQSVR					140126	675532							386740	317089							386740	317089	197867	351669
Adenomatosis polyposis coli OS=Mus musculus GN=Apc PE=2 SV=1	GLQITTTAAQIAK						147268								69126.8							57169.1	69126.8	60363.4	125238
Adenomatosis polyposis coli OS=Mus musculus GN=Apc PE=2 SV=1	IEDCPINNPR						168773								79221							71852.9	79221	232388	41659.8
Adenomatosis polyposis coli OS=Mus musculus GN=Apc PE=2 SV=1	NSISPGR	452349								2.34993e+06								2.34993e+06	623321	1.75486e+06	1.44121e+06
Adenomatosis polyposis coli OS=Mus musculus GN=Apc PE=2 SV=1	NSSSSTSPVSK						395628								185705							145800	185705	201712	463241
Adenomatosis polyposis coli OS=Mus musculus GN=Apc PE=2 SV=1	SPSEGPGATTSPR					220904	2800389							609682	1.31448e+06							609682	1.31448e+06	2.20193e+06	1.52757e+06
Adenomatosis polyposis coli OS=Mus musculus GN=Apc PE=2 SV=1	VTPFNYNPSPR						785492								368704							704909	368704	160187	578038
Adenomatosis polyposis coli OS=Mus musculus GN=Apc PE=2 SV=1	YSDEQLNSGR								60535.7								113117					253880	52779.4	138396	113117
Adseverin OS=Mus musculus GN=Scin PE=1 SV=3	AQELQHPEFAR			518956								124996						33184.9	421851	124996	94529.4
Aldehyde dehydrogenase, dimeric NADP-preferring (Fragment) OS=Mus musculus GN=Aldh3a1 PE=4 SV=1	SNISSIVNR								1343030								2.50955e+06					1.82376e+06	811371	2.64507e+06	2.50955e+06
Alpha-actinin-1 OS=Mus musculus GN=Actn1 PE=1 SV=1	ALDFIASK			2233160								537878						1.02144e+06	501216	537878	151735
Alpha-actinin-1 OS=Mus musculus GN=Actn1 PE=1 SV=1	ALDFIASKGVK			197936			503309					47675			236249			19656.1	75975.1	47675	48913.7	108267	236249	124336	173831
Alpha-actinin-1 OS=Mus musculus GN=Actn1 PE=1 SV=1	CQLEINFNTLQTK			782549			972519	869177				188484			456492	177019		226784	93244.8	188484	102832	347433	456492	177019	155126
Alpha-actinin-1 OS=Mus musculus GN=Actn1 PE=1 SV=1	DLLLDPAWEK						833244								391118							185544	391118	105353	188943
Alpha-actinin-1 OS=Mus musculus GN=Actn1 PE=1 SV=1	FAIQDISVEETSAK			869182			13047100					209351			6.1242e+06			182556	388128	209351	251158	5.59465e+06	6.1242e+06	1.66819e+07	3.03447e+06
Alpha-actinin-1 OS=Mus musculus GN=Actn1 PE=1 SV=1	GISQEQMNEFR			163207			758026					39310.2			355811			19763.8	22620.5	39310.2	50602	182691	355811	420608	310740
Alpha-actinin-1 OS=Mus musculus GN=Actn1 PE=1 SV=1	HRPELIDYGK			466461				966021				112352				196743		249534	24882.3	112352	76240.3	382285	100226	196743	440297
Alpha-actinin-1 OS=Mus musculus GN=Actn1 PE=1 SV=1	ILAGDKNYITEDELR						1130910								530840							424169	530840	619742	269872
Alpha-actinin-1 OS=Mus musculus GN=Actn1 PE=1 SV=1	KDDPLTNLNTAFDVAER			844909				177932				203504				36238.3		122966	296471	203504	79022.9	198905	40875.5	36238.3	12269.7
Alpha-actinin-1 OS=Mus musculus GN=Actn1 PE=1 SV=1	LAILGIHNEVSK						463274								217457							48698.6	217457	337959	113514
Alpha-actinin-1 OS=Mus musculus GN=Actn1 PE=1 SV=1	LASDLLEWIR						1084790								509191							313691	509191	618653	1.12151e+06
Alpha-actinin-1 OS=Mus musculus GN=Actn1 PE=1 SV=1	LDHLAEKFR						581482								272943							72885.5	272943	129298	173379
Alpha-actinin-1 OS=Mus musculus GN=Actn1 PE=1 SV=1	LSNRPAFMPSEGR			599231								144331						63391.6	49505	144331	92960
Alpha-actinin-1 OS=Mus musculus GN=Actn1 PE=1 SV=1	MEEIGR						203311								95432.9							83204.5	95432.9	1.08475e+06	758257
Alpha-actinin-1 OS=Mus musculus GN=Actn1 PE=1 SV=1	QLVPR						1622640								761654							1.44874e+06	761654	312165	5.81027e+06
Alpha-actinin-1 OS=Mus musculus GN=Actn1 PE=1 SV=1	RDQALTEEHAR						1496830								702599							713686	702599	1.96614e+06	878038
Alpha-actinin-1 OS=Mus musculus GN=Actn1 PE=1 SV=1	TINEVENQILTR			13863800			23939300	5947070				3.33923e+06			1.12369e+07	1.2112e+06		3.06207e+06	2.51382e+06	3.33923e+06	4.59404e+06	1.89962e+06	1.12369e+07	1.2112e+06	3.89879e+06
Alpha-actinin-1 OS=Mus musculus GN=Actn1 PE=1 SV=1	VGWEQLLTTIAR			778317			5498800	992848				187465			2.58109e+06	202206		260073	419110	187465	145427	1.16039e+06	2.58109e+06	202206	719906
Alpha-actinin-4 OS=Mus musculus GN=Actn4 PE=1 SV=1	AGTQIENIDEDFRDGLK						1900370								892018							2.023e+06	892018	312817	1.6401e+06
Alpha-actinin-4 OS=Mus musculus GN=Actn4 PE=1 SV=1	ALDFIASK		4091710	2233160				8663530			4.09171e+06	537878				1.76444e+06		899408	4.09171e+06	537878	1.43319e+06	705621	486632	1.76444e+06	4.65674e+06
Alpha-actinin-4 OS=Mus musculus GN=Actn4 PE=1 SV=1	ALDFIASKGVK			197936			503309					47675			236249			83019.6	28895.7	47675	28754.7	369521	236249	854027	73433.9
Alpha-actinin-4 OS=Mus musculus GN=Actn4 PE=1 SV=1	CQLEINFNTLQTK			782549			972519	869177				188484			456492	177019		136251	137263	188484	213828	301122	456492	177019	77114.8
Alpha-actinin-4 OS=Mus musculus GN=Actn4 PE=1 SV=1	DAKGISQEQMQEFR		392779	563666			1351570	160129			392780	135764			634416	32612.5		583430	392780	135764	448038	10483.6	634416	32612.5	166858
Alpha-actinin-4 OS=Mus musculus GN=Actn4 PE=1 SV=1	DDPVTNLNNAFEVAEK			71807.6			250933					17295.8			117786			10125.3	5604.32	17295.8	29675.8	55651	117786	31581.9	168738
Alpha-actinin-4 OS=Mus musculus GN=Actn4 PE=1 SV=1	DLLLDPAWEK		140988				833244				140989				391118			636889	140989	21524.1	312210	838734	391118	70546	350054
Alpha-actinin-4 OS=Mus musculus GN=Actn4 PE=1 SV=1	DYETATLSDIK		1028530	4132520		63220.2	2748540	3289590			1.02853e+06	995356		174486	1.29014e+06	669967		1.30759e+06	1.02853e+06	995356	1.88737e+06	174486	1.29014e+06	669967	599232
Alpha-actinin-4 OS=Mus musculus GN=Actn4 PE=1 SV=1	EAILAIHKEAQR						3083800								1.44751e+06							8.59447e+06	1.44751e+06	571551	3.8142e+06
Alpha-actinin-4 OS=Mus musculus GN=Actn4 PE=1 SV=1	ELPPDQAEYCIAR							771202								157065						145394	103432	157065	173255
Alpha-actinin-4 OS=Mus musculus GN=Actn4 PE=1 SV=1	ETTDTDTADQVIASFK		697334				2915770	1016729			697335				1.36864e+06	207070		3.57417e+06	697335	2.08202e+06	473975	140499	1.36864e+06	207070	618735
Alpha-actinin-4 OS=Mus musculus GN=Actn4 PE=1 SV=1	FAIQDISVEETSAK		3720850	869182			13466598	184274			3720851	209351			6.3211e+06	37529.9		570922	3720851	209351	290061	840946	6.3211e+06	37529.9	282073
Alpha-actinin-4 OS=Mus musculus GN=Actn4 PE=1 SV=1	GISQEQMQEFR		2355970	2188350			7541040	4087590			2355971	527085			3.5397e+06	832489		2.53834e+06	2355971	527085	844278	940983	3.5397e+06	832489	786924
Alpha-actinin-4 OS=Mus musculus GN=Actn4 PE=1 SV=1	IAESNHIK						2850290								1.3379e+06							1.32086e+06	1.3379e+06	2.19873e+06	483583
Alpha-actinin-4 OS=Mus musculus GN=Actn4 PE=1 SV=1	KDDPVTNLNNAFEVAEK						3750140	215615							1.76028e+06	43912.9						159000	1.76028e+06	43912.9	38387.6
Alpha-actinin-4 OS=Mus musculus GN=Actn4 PE=1 SV=1	KDDPVTNLNNAFEVAEKYLDIPK							1315160								267849						160107	215650	267849	393044
Alpha-actinin-4 OS=Mus musculus GN=Actn4 PE=1 SV=1	LASDLLEWIR						1084790								509191							1.42507e+06	509191	133660	1.14899e+06
Alpha-actinin-4 OS=Mus musculus GN=Actn4 PE=1 SV=1	LDHLAEKFR						581482								272943							720268	272943	117349	479556
Alpha-actinin-4 OS=Mus musculus GN=Actn4 PE=1 SV=1	LSGSNPYTTVTPQIINSK						897882								421458							342411	421458	1.64618e+06	543618
Alpha-actinin-4 OS=Mus musculus GN=Actn4 PE=1 SV=1	LSNRPAFMPSEGR			599231								144331						104930	46219.5	144331	82042.4
Alpha-actinin-4 OS=Mus musculus GN=Actn4 PE=1 SV=1	LVSIGAEEIVDGNAK		1095800	46314.4			4386120				1095801	11155.5			2.05881e+06			40841.1	1095801	11155.5	58651.5	434772	2.05881e+06	619446	3.88201e+06
Alpha-actinin-4 OS=Mus musculus GN=Actn4 PE=1 SV=1	MAPYQGPDAAPGALDYK		513378	949096			2949470	1490880			513379	228599			1.38446e+06	303637		136978	513379	228599	150866	1.50079e+06	1.38446e+06	303637	3.4748e+06
Alpha-actinin-4 OS=Mus musculus GN=Actn4 PE=1 SV=1	MAPYQGPDAAPGALDYKSFSTALYGESDL			653578								157421						121905	200924	157421	625163
Alpha-actinin-4 OS=Mus musculus GN=Actn4 PE=1 SV=1	MEEIGR						203311								95432.9							177595	95432.9	37486.8	115614
Alpha-actinin-4 OS=Mus musculus GN=Actn4 PE=1 SV=1	MLDAEDIVNTARPDEK						2357210								1.10645e+06							456816	1.10645e+06	745592	242017
Alpha-actinin-4 OS=Mus musculus GN=Actn4 PE=1 SV=1	QGDAEFNR			476215			747592	332619				114701			350914	67742.3		38959.9	36984.9	114701	184637	50735.5	350914	67742.3	118635
Alpha-actinin-4 OS=Mus musculus GN=Actn4 PE=1 SV=1	QRDYETATLSDIK			600981			1834450					144752			861075			129341	926755	144752	588019	842212	861075	1.00964e+06	858261
Alpha-actinin-4 OS=Mus musculus GN=Actn4 PE=1 SV=1	SFSTALYGESDL		653969	800674				1129960			653970	192850				230131		248474	653970	192850	322222	221409	308485	230131	1.17929e+06
Alpha-actinin-4 OS=Mus musculus GN=Actn4 PE=1 SV=1	TINEVENQILTR		8856851	13991973		26435.9	25744429	5947070			8.85685e+06	3.3701e+06		72963.9	1.20842e+07	1.2112e+06		1.86371e+06	8.85685e+06	3.3701e+06	1.22452e+07	72963.9	1.20842e+07	1.2112e+06	344885
Alpha-actinin-4 OS=Mus musculus GN=Actn4 PE=1 SV=1	VGWEQLLTTIAR		225700	778317			5766823	992848			225701	187465			2.7069e+06	202206		137310	225701	187465	241672	783028	2.7069e+06	202206	1.52386e+06
Alpha-actinin-4 OS=Mus musculus GN=Actn4 PE=1 SV=1	VQQLVPK			2081930			4131870	4340310				501453			1.93946e+06	883959		809906	228099	501453	1.64059e+06	1.46459e+06	1.93946e+06	883959	2.02892e+06
Alpha-adducin OS=Mus musculus GN=Add1 PE=1 SV=2	GSDSIAYDKGEKLLR			2767370				5549950				666547				1.13032e+06		1.01282e+06	817464	666547	395469	2.94485e+06	2.35825e+06	1.13032e+06	588150
Alpha-adducin OS=Mus musculus GN=Add1 PE=1 SV=2	HSFQKQQR			599808								144470						25485.2	242906	144470	164593
Alpha-adducin OS=Mus musculus GN=Add1 PE=1 SV=2	IREQNLQDIK			1796610								432731						664177	220961	432731	476653
Alpha-adducin OS=Mus musculus GN=Add1 PE=1 SV=2	LADLFGWSQLIYNHITTR							4937690								1.00562e+06						1.28445e+06	624274	1.00562e+06	970681
Alpha-adducin OS=Mus musculus GN=Add1 PE=1 SV=2	SLVQGELVTASK			8041473				2.14775e+07				1.93686e+06				4.37417e+06		6.96247e+06	2.23772e+06	1.93686e+06	1.53329e+06	2.00481e+06	1.1541e+07	4.37417e+06	4.5467e+06
Alpha-adducin OS=Mus musculus GN=Add1 PE=1 SV=2	TLASAGGPDNLVLLDPGK							194833								39680.4						76970.1	27757.1	39680.4	107371
Alpha-adducin OS=Mus musculus GN=Add1 PE=1 SV=2	TLASAGGPDNLVLLDPGKYKAK			891667				4547290				214767				926113		758562	35577.8	214767	165476	283832	441430	926113	1.8112e+06
Alpha-adducin OS=Mus musculus GN=Add1 PE=1 SV=2	VNLQGDIVDR			4138739				490474				996854				99891.4		269501	505416	996854	1.17301e+06	123665	37142.7	99891.4	425097
Alpha-adducin OS=Mus musculus GN=Add1 PE=1 SV=2	VNSEQEHFLIVPFGLLYSEVTASSLVK			3413820				9939380				822251				2.02428e+06		247402	1.12795e+06	822251	403564	2.65256e+06	1.1932e+06	2.02428e+06	4.94993e+07
Alpha-adducin OS=Mus musculus GN=Add1 PE=1 SV=2	YSDVEVPASVTGHSFASDGDSGTCSPLR							5684120								1.15764e+06						3.6397e+06	285850	1.15764e+06	2.14722e+06
Alpha-crystallin B chain OS=Mus musculus GN=Cryab PE=1 SV=2	FSVNLDVK							3324440								677064						535026	1.79238e+06	677064	681454
Alpha-crystallin B chain OS=Mus musculus GN=Cryab PE=1 SV=2	KQVSGPER				1104680								4.39645e+06					1.16509e+06	2.45266e+06	5.73325e+06	4.39645e+06
Alpha-enolase OS=Mus musculus GN=Eno1 PE=1 SV=3	AAVPSGASTGIYEALELR		273986					903374			273987					183984		484206	273987	1.08107e+06	223566	236691	159285	183984	663027
Alpha-enolase OS=Mus musculus GN=Eno1 PE=1 SV=3	DATNVGDEGGFAPNILENK							121366								24717.9						54934.7	9795.48	24717.9	15072.5
Alpha-enolase OS=Mus musculus GN=Eno1 PE=1 SV=3	GNPTVEVDLYTAK							401556								81782.1						364440	122871	81782.1	80323.3
Alpha-enolase OS=Mus musculus GN=Eno1 PE=1 SV=3	VNQIGSVTESLQACK							176596								35966.2						34985.8	51974.9	35966.2	138665
Annexin A1 OS=Mus musculus GN=Anxa1 PE=1 SV=2	DITSDTSGDFR							400288								81523.9						30712.7	146454	81523.9	170174
Annexin A1 OS=Mus musculus GN=Anxa1 PE=1 SV=2	GVDEATIIDILTK							1509710								307472						66182.1	922991	307472	107123
Annexin A1 OS=Mus musculus GN=Anxa1 PE=1 SV=2	TPAQFDADELR							708448								144285						266222	122471	144285	412100
Annexin A2 OS=Mus musculus GN=Anxa2 PE=1 SV=2	AEDGSVIDYELIDQDAR							2081868								423999						166851	225960	423999	688682
Annexin A2 OS=Mus musculus GN=Anxa2 PE=1 SV=2	GLGTDEDSLIEIICSR							2361031								480854						263537	244123	480854	1.11462e+06
Annexin A2 OS=Mus musculus GN=Anxa2 PE=1 SV=2	GVDEVTIVNILTNR		517867					1.18937e+07			517868					2.42231e+06		251475	517868	1.65245e+06	479457	7.9961e+06	1.88226e+06	2.42231e+06	3.78883e+06
Annexin A2 OS=Mus musculus GN=Anxa2 PE=1 SV=2	QDIAFAYQR							9810426								1.99802e+06						3.82539e+06	570341	1.99802e+06	2.52807e+06
Annexin A2 OS=Mus musculus GN=Anxa2 PE=1 SV=2	RAEDGSVIDYELIDQDAR							4551205								926910						1.23986e+06	623088	926910	1.54845e+06
Annexin A2 OS=Mus musculus GN=Anxa2 PE=1 SV=2	SLYYYIQQDTK							3235900								659032						144416	1.43578e+06	659032	1.26672e+06
Annexin A2 OS=Mus musculus GN=Anxa2 PE=1 SV=2	STVHEILCK							3927860								799958						438798	185218	799958	3.25263e+06
Annexin A2 OS=Mus musculus GN=Anxa2 PE=1 SV=2	TDLEKDIISDTSGDFR							747180								152173						31026.6	50426.8	152173	62062.5
Annexin A2 OS=Mus musculus GN=Anxa2 PE=1 SV=2	TDLEKDIISDTSGDFRK							1939790								395063						756591	199897	395063	473312
Annexin A2 OS=Mus musculus GN=Anxa2 PE=1 SV=2	TNQELQEINR	468460	1.52421e+06			331772	197799	15959518		2.43362e+06	1.52421e+06			915668	92845.6	3.25036e+06		2.43362e+06	1.52421e+06	896928	4.2833e+06	915668	92845.6	3.25036e+06	1.07561e+06
Annexin A2 OS=Mus musculus GN=Anxa2 PE=1 SV=2	TPAQYDASELK		713041					17482970			713042					3.56063e+06		217878	713042	720242	2.00237e+06	1.5159e+06	8.70548e+06	3.56063e+06	1.05844e+07
Annexin A5 OS=Mus musculus GN=Anxa5 PE=1 SV=1	GAGTDDHTLIR							818834								166766						101183	95064.2	166766	68032
Annexin A5 OS=Mus musculus GN=Anxa5 PE=1 SV=1	NFATSLYSMIK							589773								120115						123152	50850.9	120115	158008
Annexin A5 OS=Mus musculus GN=Anxa5 PE=1 SV=1	VLTEIIASR							9760131								1.98777e+06						1.22789e+06	1.66918e+06	1.98777e+06	2.72298e+06
Apolipoprotein O-like OS=Mus musculus GN=Apool PE=2 SV=1	MGVITASGLAGLLSAR						128986								60545.4							167461	60545.4	101367	19111.1
Apolipoprotein O-like OS=Mus musculus GN=Apool PE=2 SV=1	YVEEQPGNLQR						1129980								530403							332336	530403	362097	445953
Apoptosis-inducing factor 1, mitochondrial OS=Mus musculus GN=Aifm1 PE=1 SV=1	APSHVPFLLIGGGTAAFAAAR		217473								217474							45543.5	217474	196156	218015
Apoptosis-inducing factor 1, mitochondrial OS=Mus musculus GN=Aifm1 PE=1 SV=1	SATEQSGTGIR		126189				122278				126190				57396.7			59273	126190	84940.5	102641	65802.2	57396.7	103479	46441.7
Ataxin-2 OS=Mus musculus GN=Atxn2 PE=1 SV=1	AASHTSDFNPNAGSDQR						2385860								1.1199e+06							2.82832e+06	1.1199e+06	673666	384310
Ataxin-2 OS=Mus musculus GN=Atxn2 PE=1 SV=1	DAFTDSALSAK						943509								442875							229455	442875	1.23728e+06	149341
Ataxin-2 OS=Mus musculus GN=Atxn2 PE=1 SV=1	MGQPGPGSMPSR						784364								368174							895661	368174	180897	119241
Ataxin-2 OS=Mus musculus GN=Atxn2 PE=1 SV=1	TSPAGGTWSSVVSGVPR		881268				2507540				881269				1.17702e+06			3.1094e+06	881269	878054	1.60076e+06	1.88175e+06	1.17702e+06	793370	807843
Ataxin-2-like protein OS=Mus musculus GN=Atxn2l PE=1 SV=1	AAQLAR						3716200								1.74435e+06							1.51735e+06	1.74435e+06	1.03154e+06	1.93332e+06
Ataxin-2-like protein OS=Mus musculus GN=Atxn2l PE=1 SV=1	AAQLAREIESSPQYR						1187880								557581							196907	557581	937824	412824
Ataxin-2-like protein OS=Mus musculus GN=Atxn2l PE=1 SV=1	AEGLQVGQDAR						551732								258979							354901	258979	192961	245861
Ataxin-2-like protein OS=Mus musculus GN=Atxn2l PE=1 SV=1	FGAQFK						586007								275067							232836	275067	76378.3	398206
Ataxin-2-like protein OS=Mus musculus GN=Atxn2l PE=1 SV=1	GQTTGKGPPQSPVFEGVYNNSR						1959470								919759							154351	919759	275621	944071
Ataxin-2-like protein OS=Mus musculus GN=Atxn2l PE=1 SV=1	IAGKVPGLQNEQKR						561473								263551							394562	263551	711871	81662.5
Ataxin-2-like protein OS=Mus musculus GN=Atxn2l PE=1 SV=1	KASEPAGGPR						2466780								1.15789e+06							2.5133e+06	1.15789e+06	1.01753e+06	2.74912e+06
Ataxin-2-like protein OS=Mus musculus GN=Atxn2l PE=1 SV=1	LQPSSSPETGLDPFPSR						1910460								896754							1.42179e+06	896754	2.99721e+06	2.11516e+06
Ataxin-2-like protein OS=Mus musculus GN=Atxn2l PE=1 SV=1	NLEAQELAR						2260440								1.06103e+06							1.15947e+06	1.06103e+06	3.32446e+06	4.37743e+06
Ataxin-2-like protein OS=Mus musculus GN=Atxn2l PE=1 SV=1	QGSGRESPSLVSR						3781060								1.7748e+06							2.99612e+06	1.7748e+06	1.96691e+06	3.57708e+06
Ataxin-2-like protein OS=Mus musculus GN=Atxn2l PE=1 SV=1	STSTPTSPGPR						4463770								2.09526e+06							1.02679e+06	2.09526e+06	2.10563e+06	2.30645e+06
Ataxin-2-like protein OS=Mus musculus GN=Atxn2l PE=1 SV=1	TLSSPSNRPSGEASVPPTSAVGR						6155330								2.88926e+06							3.99054e+06	2.88926e+06	447404	3.14669e+06
Aurora kinase B OS=Mus musculus GN=Aurkb PE=1 SV=2	AQKENAYPWPYGSKTSQSGLNTLSQR							5207110								1.06049e+06						889536	1.07487e+06	1.06049e+06	2.54831e+06
Aurora kinase B OS=Mus musculus GN=Aurkb PE=1 SV=2	FGNVYLAR		157806				437079	358218			157807				205162	72955.8		39795	157807	345065	342646	197263	205162	72955.8	133871
Aurora kinase B OS=Mus musculus GN=Aurkb PE=1 SV=2	FNSQSTAAPGQK				314697		204568						1.25245e+06		96022.9			942228	435764	539718	1.25245e+06	85707.7	96022.9	18731.8	28984
Aurora kinase B OS=Mus musculus GN=Aurkb PE=1 SV=2	GELYKELQK							774315								157699						617803	257491	157699	424358
Aurora kinase B OS=Mus musculus GN=Aurkb PE=1 SV=2	IYLILEYAPR							155696								31709.7						5649.45	108487	31709.7	13690.3
Aurora kinase B OS=Mus musculus GN=Aurkb PE=1 SV=2	LPLAEVAAHPWVR			1416570				5580840				341194				1.13661e+06		539811	1.01587e+06	341194	718451	2.75581e+06	423277	1.13661e+06	3.8496e+06
Aurora kinase B OS=Mus musculus GN=Aurkb PE=1 SV=2	TSQSGLNTLSQR		436350	1179848			658433	1.95554e+06			436351	284178			309063	398271		362499	436351	284178	867492	201369	309063	398271	754771
Aurora kinase B OS=Mus musculus GN=Aurkb PE=1 SV=2	VLRKEPATTSALALVNR			1338371				1208634				322359				246154		535705	387672	322359	788582	329648	63712.5	246154	419052
B-cell lymphoma/leukemia 11B OS=Mus musculus GN=Bcl11b PE=1 SV=1	IYLEPGPASTSLTPR		847419								847420							229794	847420	1.96598e+06	218273
Beta-actin-like protein 2 OS=Mus musculus GN=Actbl2 PE=1 SV=1	CDVDIR		142186000	74839770			140979000	24867905			1.42186e+08	1.80259e+07			6.61743e+07	5.06466e+06		4.85721e+07	1.42186e+08	1.80259e+07	8.13669e+07	2.44222e+06	6.61743e+07	5.06466e+06	9.4178e+06
Beta-actin-like protein 2 OS=Mus musculus GN=Actbl2 PE=1 SV=1	CDVDIRK			13418000			47391700					3.23185e+06			2.22453e+07			2.87563e+06	1.0074e+06	3.23185e+06	4.03431e+06	2.76873e+07	2.22453e+07	6.33754e+07	5.73833e+07
Beta-actin-like protein 2 OS=Mus musculus GN=Actbl2 PE=1 SV=1	DLTDYLMK						50107900								2.35202e+07							2.50612e+07	2.35202e+07	2.35079e+07	3.32985e+07
Beta-actin-like protein 2 OS=Mus musculus GN=Actbl2 PE=1 SV=1	DLTDYLMKILTER		1148090	2840600			2295110				1.14809e+06	684185			1.07731e+06			865896	1.14809e+06	684185	1.11493e+06	2.90956e+06	1.07731e+06	1.15327e+06	459582
Beta-actin-like protein 2 OS=Mus musculus GN=Actbl2 PE=1 SV=1	GILTLK			123880000				25631900				2.98377e+07				5.22026e+06		2.61344e+07	1.81527e+08	2.98377e+07	2.50045e+07	3.52032e+06	1.41698e+07	5.22026e+06	3.88725e+06
Beta-actin-like protein 2 OS=Mus musculus GN=Actbl2 PE=1 SV=1	HQGVMVGMGQK		135196000	550910			111633000				135196001	132692			5.23996e+07			6.39791e+06	135196001	132692	1.68669e+07	4.18103e+07	5.23996e+07	1.41763e+07	7.20595e+07
Beta-actin-like protein 2 OS=Mus musculus GN=Actbl2 PE=1 SV=1	IIAPPER		609355000	716902700		32167400	987467000	104037000			6.09355e+08	1.72673e+08		8.87797e+07	4.63508e+08	2.11884e+07		1.52406e+08	6.09355e+08	1.72673e+08	7.62956e+07	8.87797e+07	4.63508e+08	2.11884e+07	1.50173e+08
Beta-actin-like protein 2 OS=Mus musculus GN=Actbl2 PE=1 SV=1	IIAPPERK		930576000	927634130		26120200	919455790	179559610			9.30576e+08	2.23429e+08		7.20899e+07	4.31585e+08	3.65696e+07		1.85046e+09	9.30576e+08	2.23429e+08	6.31315e+08	7.20899e+07	4.31585e+08	3.65696e+07	3.60913e+08
Beta-actin-like protein 2 OS=Mus musculus GN=Actbl2 PE=1 SV=1	IKIIAPPER		144492000	217391740		1390360	189232420	81149750			1.44492e+08	5.23608e+07		3.8373e+06	8.88241e+07	1.65272e+07		7.12994e+07	1.44492e+08	5.23608e+07	1.4155e+08	3.8373e+06	8.88241e+07	1.65272e+07	2.76857e+07
Beta-actin-like protein 2 OS=Mus musculus GN=Actbl2 PE=1 SV=1	IKIIAPPERK		77509700	76294887			147039641	32319700			7.75097e+07	1.83763e+07			6.90191e+07	6.58231e+06		4.0238e+07	7.75097e+07	1.83763e+07	5.15174e+07	2.80373e+07	6.90191e+07	6.58231e+06	8.10516e+06
Beta-actin-like protein 2 OS=Mus musculus GN=Actbl2 PE=1 SV=1	LDLAGR			202851570			182533100	65654300				4.88587e+07			8.56795e+07	1.33713e+07		3.77883e+07	2.15259e+07	4.88587e+07	2.99661e+07	1.7188e+07	8.56795e+07	1.33713e+07	1.21068e+07
Beta-actin-like protein 2 OS=Mus musculus GN=Actbl2 PE=1 SV=1	LDLAGRDLTDYLMK		121566	22237018			40131900	1121000			121567	5.35599e+06			1.88376e+07	228306		1.3229e+06	121567	5.35599e+06	1.02093e+06	3.15453e+06	1.88376e+07	228306	4.33096e+06
Beta-actin-like protein 2 OS=Mus musculus GN=Actbl2 PE=1 SV=1	LDLAGRDLTDYLMKILTER			12319100								2.96717e+06						1.10491e+06	7.6777e+06	2.96717e+06	1.66785e+06
Beta-actin-like protein 2 OS=Mus musculus GN=Actbl2 PE=1 SV=1	RGILTLK			14531200			39326900					3.49998e+06			1.84597e+07			7.67982e+06	2.68606e+06	3.49998e+06	2.99653e+06	1.68863e+07	1.84597e+07	7.22511e+06	4.01082e+07
Beta-actin-like protein 2 OS=Mus musculus GN=Actbl2 PE=1 SV=1	SYELPDGQVITIGNER		659588000	2413302550		13181900	1106521490	748018604			6.59588e+08	5.81266e+08		3.63811e+07	5.19392e+08	1.52343e+08		4.0893e+09	6.59588e+08	5.81266e+08	1.04057e+09	3.63811e+07	5.19392e+08	1.52343e+08	9.99464e+07
Beta-actin-like protein 2 OS=Mus musculus GN=Actbl2 PE=1 SV=1	SYELPDGQVITIGNERFR		8323520	1920820			98325500				8323521	462648			4.61531e+07			777012	8323521	462648	4.0388e+06	2.04322e+08	4.61531e+07	2.79903e+07	9.40067e+07
Beta-actin-like protein 2 OS=Mus musculus GN=Actbl2 PE=1 SV=1	TTGIVMDSGDGVTHTVPIYEGYALPHAILR		840603000	177853800			550963000	5135120			8.40603e+08	4.28377e+07			2.58617e+08	1.04583e+06		1.19947e+08	8.40603e+08	4.28377e+07	3.93341e+08	6.38503e+07	2.58617e+08	1.04583e+06	3.79847e+07
Beta-actin-like protein 2 OS=Mus musculus GN=Actbl2 PE=1 SV=1	VAPDEHPILLTEAPLNPK		1227830000	1672830				262005			1227830001	402917				53360.8		5.03483e+07	1227830001	402917	7.85384e+06	14338.7	103649	53360.8	44139.8
Bifunctional glutamate/proline--tRNA ligase OS=Mus musculus GN=Eprs PE=1 SV=4	TGQEYKPGNPSAAAVQTVSTK		524876								524877							95550.4	524877	2.70662e+06	789670
Bifunctional glutamate/proline--tRNA ligase OS=Mus musculus GN=Eprs PE=1 SV=4	VAVQGDVVR		520947								520948							486627	520948	294353	523152
Bifunctional glutamate/proline--tRNA ligase OS=Mus musculus GN=Eprs PE=1 SV=4	VYEELLAIPVVR		651736								651737							538999	651737	569115	1.18076e+06
Bromodomain-containing protein 4 OS=Mus musculus GN=Brd4 PE=1 SV=2	VDVIAGSSK						479185								224926							285039	224926	142285	108071
Bromodomain-containing protein 4 OS=Mus musculus GN=Brd4 PE=1 SV=2	VVHIIQSR						887977								416809							328469	416809	1.52004e+06	130882
Bromodomain-containing protein 8 OS=Mus musculus GN=Brd8 PE=2 SV=1	KATDAAYQAR		270930				296200				270931				139034			245732	270931	794752	142474	647089	139034	71932.1	87318.2
Bromodomain-containing protein 8 OS=Mus musculus GN=Brd8 PE=2 SV=1	KLEEEEAEVKR		379358								379359							297841	379359	412058	946312
Bromodomain-containing protein 8 OS=Mus musculus GN=Brd8 PE=2 SV=1	SGDQNWVSVSR		1342610				1333210				1342611				625798			2.40368e+06	1342611	3.30236e+06	2.29099e+06	257065	625798	1.25695e+06	548785
CDKN2A-interacting protein OS=Mus musculus GN=Cdkn2aip PE=2 SV=1	AQEVSEYLSQNPR		2444680				7450990				2.44468e+06				3.49743e+06			4.67388e+06	2.44468e+06	1.06211e+06	3.83267e+06	1.70816e+06	3.49743e+06	2.1619e+06	1.20008e+06
CDKN2A-interacting protein OS=Mus musculus GN=Cdkn2aip PE=2 SV=1	GISSSNEGVEEPSK						406420								190770							578793	190770	84107.7	89690.3
CDKN2A-interacting protein OS=Mus musculus GN=Cdkn2aip PE=2 SV=1	GISSSNEGVEEPSKKR						844532								396416							595019	396416	350273	342156
CDKN2A-interacting protein OS=Mus musculus GN=Cdkn2aip PE=2 SV=1	NAGDLVPATDETADAESGAR		1417740				3599280				1.41774e+06				1.68947e+06			3.18198e+06	1.41774e+06	1.73458e+06	3.57703e+06	2.37416e+06	1.68947e+06	2.55435e+06	545456
CDKN2A-interacting protein OS=Mus musculus GN=Cdkn2aip PE=2 SV=1	SAAQQENSSPSR						642002								301351							478218	301351	790516	105921
CDKN2A-interacting protein OS=Mus musculus GN=Cdkn2aip PE=2 SV=1	SGASLGSVSQLAAK		1065990								1065991							774683	1065991	1.12355e+06	4.16205e+06
CDKN2A-interacting protein OS=Mus musculus GN=Cdkn2aip PE=2 SV=1	SGSQSSTSQLPSK		726003				1398930				726004				656646			332710	726004	382091	534189	445653	656646	1.46665e+06	196553
CDKN2A-interacting protein OS=Mus musculus GN=Cdkn2aip PE=2 SV=1	SSQESIVCELR						1159160								544100							1.15841e+06	544100	882593	302165
CDKN2A-interacting protein OS=Mus musculus GN=Cdkn2aip PE=2 SV=1	SSSEANISSSVSK		558228				1688580				558229				792605			682270	558229	302555	304628	1.18986e+06	792605	438988	984096
CDKN2A-interacting protein OS=Mus musculus GN=Cdkn2aip PE=2 SV=1	SSSETASSGLTSK		580483				1194720				580484				560792			275378	580484	156362	280423	447867	560792	277100	878252
CDKN2A-interacting protein OS=Mus musculus GN=Cdkn2aip PE=2 SV=1	SSSSGSHQDSATSEGDR						586892								275482							265002	275482	434182	209995
CDKN2A-interacting protein OS=Mus musculus GN=Cdkn2aip PE=2 SV=1	STAQVAASLLATK		784493				1904830				784494				894111			716660	784494	2.13691e+06	388707	1.95905e+06	894111	6.42231e+06	397401
CDKN2A-interacting protein OS=Mus musculus GN=Cdkn2aip PE=2 SV=1	STSQASESSVK		190825				734544				190826				344789			97979.5	190826	225577	166654	663691	344789	407304	129304
CGG triplet repeat-binding protein 1 OS=Mus musculus GN=Cggbp1 PE=2 SV=1	FVVTAPPAR						1053390								494453							1.44513e+06	494453	1.77404e+06	455002
CGG triplet repeat-binding protein 1 OS=Mus musculus GN=Cggbp1 PE=2 SV=1	TALYVTPLDR						1066930								500808							124949	500808	358182	1.63104e+06
CREB-binding protein OS=Mus musculus GN=Crebbp PE=1 SV=3	CIQSLVHACQCR						363760								170746							1.75991e+06	170746	224076	497022
CREB-binding protein OS=Mus musculus GN=Crebbp PE=1 SV=3	DAAYYSYQNR						654716								307318							115865	307318	544668	415592
CREB-binding protein OS=Mus musculus GN=Crebbp PE=1 SV=3	QLCTIPR						1434190								673197							626387	673197	735895	1.23809e+06
CREB-binding protein OS=Mus musculus GN=Crebbp PE=1 SV=3	RQNHPEAGEVFVR						1394040								654351							354114	654351	3.90385e+06	983992
Calcium-binding mitochondrial carrier protein Aralar1 OS=Mus musculus GN=Slc25a12 PE=1 SV=1	IAPLAEGALPYNLAELQR		558003								558004							1.08424e+06	558004	1.21794e+06	1.24878e+06
Calcium-binding mitochondrial carrier protein Aralar1 OS=Mus musculus GN=Slc25a12 PE=1 SV=1	VGGINLLTAGALAGVPAASLVTPADVIK		130815								130816							104529	130816	152724	66505
Capping protein (Actin filament) muscle Z-line, alpha 1 OS=Mus musculus GN=Capza1 PE=2 SV=1	ADFEDRVSDEEK			520024				1103790				125253				224801		687490	141281	125253	42408.7	373214	92721.2	224801	171380
Capping protein (Actin filament) muscle Z-line, alpha 1 OS=Mus musculus GN=Capza1 PE=2 SV=1	ADFEDRVSDEEKVR		2984210	149650420				291497320			2.98421e+06	3.60447e+07				5.93671e+07		2.32262e+06	2.98421e+06	3.60447e+07	5.41389e+06	2.89895e+07	2.11225e+07	5.93671e+07	4.97031e+07
Capping protein (Actin filament) muscle Z-line, alpha 1 OS=Mus musculus GN=Capza1 PE=2 SV=1	ADFEDRVSDEEKVRIAAK			22479300				88498200				5.41435e+06				1.80238e+07		3.33555e+06	3.02803e+06	5.41435e+06	1.19252e+07	3.67262e+07	3.05342e+07	1.80238e+07	3.93007e+07
Capping protein (Actin filament) muscle Z-line, alpha 1 OS=Mus musculus GN=Capza1 PE=2 SV=1	AYVKDHYSNGFCTVYAK							2687540								547352						262714	305243	547352	255531
Capping protein (Actin filament) muscle Z-line, alpha 1 OS=Mus musculus GN=Capza1 PE=2 SV=1	DVQDSVTVSNEIQTTK		917476	18108798			1223000	41228886			917477	4.36167e+06			574066	8.39678e+06		534187	917477	4.36167e+06	1.27072e+06	2.71776e+06	574066	8.39678e+06	1.03679e+06
Capping protein (Actin filament) muscle Z-line, alpha 1 OS=Mus musculus GN=Capza1 PE=2 SV=1	EASDPQPEDVDGGLK		656041	14075100			929728	26637290			656042	3.39012e+06			436407	5.42502e+06		1.30024e+06	656042	3.39012e+06	1.18493e+07	2.48859e+06	436407	5.42502e+06	960512
Capping protein (Actin filament) muscle Z-line, alpha 1 OS=Mus musculus GN=Capza1 PE=2 SV=1	EASDPQPEDVDGGLKSWR			1321630				33837800				318327				6.89149e+06		605489	557670	318327	2.42836e+06	3.57424e+06	2.78455e+06	6.89149e+06	1.05688e+07
Capping protein (Actin filament) muscle Z-line, alpha 1 OS=Mus musculus GN=Capza1 PE=2 SV=1	EASDPQPEDVDGGLKSWRESCDSALR			11019300								2.6541e+06						2.69598e+06	2.38844e+06	2.6541e+06	3.31683e+06
Capping protein (Actin filament) muscle Z-line, alpha 1 OS=Mus musculus GN=Capza1 PE=2 SV=1	EGAAHAFAQYNMDQFTPVK							322409								65662.9						35100.4	42373.4	65662.9	85873.3
Capping protein (Actin filament) muscle Z-line, alpha 1 OS=Mus musculus GN=Capza1 PE=2 SV=1	ESCDSALR		1287000				1664300				1287001				781208			662696	1287001	933214	1.36012e+06	302163	781208	639907	842317
Capping protein (Actin filament) muscle Z-line, alpha 1 OS=Mus musculus GN=Capza1 PE=2 SV=1	FITHAPPGEFNEVFNDVR			7768175				60976060				1.87104e+06				1.24185e+07		3.00531e+06	2.95009e+06	1.87104e+06	1.86449e+06	7.26006e+06	9.95512e+06	1.24185e+07	4.99402e+07
Capping protein (Actin filament) muscle Z-line, alpha 1 OS=Mus musculus GN=Capza1 PE=2 SV=1	FITHAPPGEFNEVFNDVRLLLNNDNLLR							1308800								266554						54971.1	227580	266554	68064.6
Capping protein (Actin filament) muscle Z-line, alpha 1 OS=Mus musculus GN=Capza1 PE=2 SV=1	FLDPR		13501600	39018600				61453000			1.35016e+07	9.39799e+06				1.25157e+07		2.55465e+07	1.35016e+07	9.39799e+06	2.07113e+07	1.856e+07	3.85588e+07	1.25157e+07	1.25158e+07
Capping protein (Actin filament) muscle Z-line, alpha 1 OS=Mus musculus GN=Capza1 PE=2 SV=1	FLDPRNQISFK							1482930								302018						293315	237434	302018	144379
Capping protein (Actin filament) muscle Z-line, alpha 1 OS=Mus musculus GN=Capza1 PE=2 SV=1	FTITPPSAQVVGVLK		135918	11857212			174577	26535974			135919	2.85592e+06			81945.4	5.40439e+06		249160	135919	2.85592e+06	1.64433e+06	879922	81945.4	5.40439e+06	247688
Capping protein (Actin filament) muscle Z-line, alpha 1 OS=Mus musculus GN=Capza1 PE=2 SV=1	IAAKFITHAPPGEFNEVFNDVR							279099								56842.2						101169	34310.9	56842.2	55495.9
Capping protein (Actin filament) muscle Z-line, alpha 1 OS=Mus musculus GN=Capza1 PE=2 SV=1	IEGYDDQVLITEHGDLGNSR							3998920								814431						812281	318668	814431	1.29985e+06
Capping protein (Actin filament) muscle Z-line, alpha 1 OS=Mus musculus GN=Capza1 PE=2 SV=1	IIESAENEYQTAISENYQTMSDTTFK							8917460								1.81615e+06						1.67282e+06	1.90966e+06	1.81615e+06	2.83697e+06
Capping protein (Actin filament) muscle Z-line, alpha 1 OS=Mus musculus GN=Capza1 PE=2 SV=1	ILSYK			9899820								2.38446e+06						3.72958e+06	1.58621e+06	2.38446e+06	741169
Capping protein (Actin filament) muscle Z-line, alpha 1 OS=Mus musculus GN=Capza1 PE=2 SV=1	IQVHYYEDGNVQLVSHK							2765290								563186						415501	6.68357e+06	563186	820522
Capping protein (Actin filament) muscle Z-line, alpha 1 OS=Mus musculus GN=Capza1 PE=2 SV=1	KEASDPQPEDVDGGLKSWR							2218170								451758						132037	210480	451758	275980
Capping protein (Actin filament) muscle Z-line, alpha 1 OS=Mus musculus GN=Capza1 PE=2 SV=1	KEASDPQPEDVDGGLKSWRESCDSALR							5754670								1.17201e+06						1.09296e+06	212700	1.17201e+06	3.29222e+06
Capping protein (Actin filament) muscle Z-line, alpha 1 OS=Mus musculus GN=Capza1 PE=2 SV=1	LLLNNDNLLR		2757730	67473550			8426740	119301610			2757731	1.62516e+07			3.95544e+06	2.42973e+07		7.09153e+06	2757731	1.62516e+07	1.81608e+06	3.4723e+06	3.95544e+06	2.42973e+07	1.17224e+06
Capping protein (Actin filament) muscle Z-line, alpha 1 OS=Mus musculus GN=Capza1 PE=2 SV=1	QLPVTR			42221200				81667590				1.01694e+07				1.66326e+07		741186	1.12232e+07	1.01694e+07	1.17967e+07	1.10766e+07	1.02257e+07	1.66326e+07	7.87669e+06
Capping protein (Actin filament) muscle Z-line, alpha 1 OS=Mus musculus GN=Capza1 PE=2 SV=1	RQLPVTR							8264360								1.68314e+06						2.0785e+06	2.25341e+06	1.68314e+06	1.02881e+06
Capping protein (Actin filament) muscle Z-line, alpha 1 OS=Mus musculus GN=Capza1 PE=2 SV=1	SEWKFTITPPSAQVVGVLK			291814				4267490				70286.4				869128		33208.5	67682.9	70286.4	100691	429428	984124	869128	2.1076e+06
Capping protein (Actin filament) muscle Z-line, alpha 1 OS=Mus musculus GN=Capza1 PE=2 SV=1	SWRESCDSALR			628507				1177580				151382				239829		324632	80975.6	151382	135488	648750	160131	239829	280519
Capping protein (Actin filament) muscle Z-line, alpha 1 OS=Mus musculus GN=Capza1 PE=2 SV=1	TIDGQQTIIACIESHQFQPK							440916								89798.3						50697.1	181340	89798.3	36584.4
Caprin-1 OS=Mus musculus GN=Caprin1 PE=1 SV=2	ALKEIVER		2075290				3331430				2075291				1.56374e+06			1.75145e+06	2075291	6.32337e+06	2.33627e+06	3.83049e+06	1.56374e+06	2.17534e+06	2.63417e+06
Caprin-1 OS=Mus musculus GN=Caprin1 PE=1 SV=2	DYSGYQR						964438								452699							290034	452699	1.32314e+06	556296
Caprin-1 OS=Mus musculus GN=Caprin1 PE=1 SV=2	GKLDDYQER		659196				576336				659197				270528			3.91393e+06	659197	260285	1.73699e+06	250140	270528	514785	224991
Caprin-1 OS=Mus musculus GN=Caprin1 PE=1 SV=2	LDDYQER		374985								374986							347121	374986	476129	413639
Caprin-1 OS=Mus musculus GN=Caprin1 PE=1 SV=2	SFMALSQDIQK		738560				1372840				738561				644400			194921	738561	1.97695e+06	858397	420868	644400	560839	425191
Caprin-1 OS=Mus musculus GN=Caprin1 PE=1 SV=2	SSGPPPPSGSSGSEAAAGAAAPASQHPATGTGAVQTEAMK		712197								712198							1.22966e+06	712198	3.29605e+06	412455
Caprin-1 OS=Mus musculus GN=Caprin1 PE=1 SV=2	YQEVTNNLEFAK						281012								131905							142243	131905	89412.6	720506
Casein kinase I isoform alpha OS=Mus musculus GN=Csnk1a1 PE=2 SV=2	AAQQAASSSGQGQQAQTPTGK						1000510								469631							472555	469631	198977	895230
Casein kinase I isoform alpha OS=Mus musculus GN=Csnk1a1 PE=2 SV=2	ILQGGVGIPHIR						352248								165343							166950	165343	111100	765016
Casein kinase I isoform delta OS=Mus musculus GN=Csnk1d PE=1 SV=2	FDDKPDYSYLR		704865				553235				704866				259684			386381	704866	421918	323122	157018	259684	96676.8	252128
Casein kinase I isoform delta OS=Mus musculus GN=Csnk1d PE=1 SV=2	GAPVNVSSSDLTGR		1161030				1303490				1.16103e+06				611847			1.14624e+06	1.16103e+06	1.90806e+06	419653	512712	611847	126309	1.31637e+06
Casein kinase I isoform delta OS=Mus musculus GN=Csnk1d PE=1 SV=2	GLPSTASGR		2299190				3534230				2.29919e+06				1.65894e+06			1.31487e+06	2.29919e+06	4.17738e+06	317452	2.5329e+06	1.65894e+06	1.51422e+06	892574
Casein kinase I isoform delta OS=Mus musculus GN=Csnk1d PE=1 SV=2	VASSGLQSVVHR		542171				1060610				542172				497842			324083	542172	94730.3	795588	442425	497842	673229	324441
Casein kinase I isoform delta OS=Mus musculus GN=Csnk1d PE=1 SV=2	YASINTHLGIEQSR		1589540								1.58954e+06							4.44864e+06	1.58954e+06	417246	3.58681e+06
Cell division cycle 5-like protein OS=Mus musculus GN=Cdc5l PE=1 SV=2	VGQASEVAR					267573								738485								738485	1.14793e+06	420348	459332
Centrosomal protein of 170 kDa OS=Mus musculus GN=Cep170 PE=2 SV=1	GTDSKVEAAAEVQPR					137894								380580								380580	580892	264900	751809
Centrosomal protein of 170 kDa OS=Mus musculus GN=Cep170 PE=2 SV=1	ISQDLALIAR						1053930								494706							465951	494706	536282	142444
Centrosomal protein of 170 kDa OS=Mus musculus GN=Cep170 PE=2 SV=1	LGSLSAR						460706								216252							45029.7	216252	47382	108965
Centrosomal protein of 170 kDa OS=Mus musculus GN=Cep170 PE=2 SV=1	SLTSWFLVSSGGTR						367575								172537							405112	172537	83442.3	170341
Centrosomal protein of 170 kDa OS=Mus musculus GN=Cep170 PE=2 SV=1	TAEAVIR						1139500								534872							157039	534872	463402	883696
Chloride intracellular channel protein 1 OS=Mus musculus GN=Clic1 PE=1 SV=3	AEEQPQVELFVK							332293								67675.9						65752.7	62971.6	67675.9	72126.3
Chromatin target of PRMT1 protein OS=Mus musculus GN=Chtop PE=1 SV=2	AAQSAPK		1259680								1259681							3.32417e+06	1259681	541588	2.21324e+06
Chromatin target of PRMT1 protein OS=Mus musculus GN=Chtop PE=1 SV=2	AAQSAPKVVLK	462734	906328			45948000				2.40388e+06	906329			1.26813e+08				2.40388e+06	906329	5.76529e+06	1.90387e+06	1.26813e+08	3.25732e+08	1.6998e+08	1.40748e+08
Chromatin target of PRMT1 protein OS=Mus musculus GN=Chtop PE=1 SV=2	AAQSAPKVVLKSTTK						27588.3								12950.2							17543.3	12950.2	8579.2	9446.4
Chromatin target of PRMT1 protein OS=Mus musculus GN=Chtop PE=1 SV=2	ASMQQQQQLASAR	9563266	210034204		9234700	83658203	703563125		9179568	4.96805e+07	2.10034e+08		3.67526e+07	2.30891e+08	3.30246e+08		1.71527e+07	4.96805e+07	2.10034e+08	2.18596e+07	3.67526e+07	2.30891e+08	3.30246e+08	5.46781e+08	1.71527e+07
Chromatin target of PRMT1 protein OS=Mus musculus GN=Chtop PE=1 SV=2	ASMQQQQQLASARNR		160207								160208							370840	160208	354061	858613
Chromatin target of PRMT1 protein OS=Mus musculus GN=Chtop PE=1 SV=2	EQLDNQLDAYMSK	1475550	23382039	859957		25519650	4321445		2412160	7.66539e+06	2.3382e+07	207129		7.04324e+07	2.02845e+06		4.5073e+06	7.66539e+06	2.3382e+07	207129	4.0414e+06	7.04324e+07	2.02845e+06	1.1231e+07	4.5073e+06
Chromatin target of PRMT1 protein OS=Mus musculus GN=Chtop PE=1 SV=2	FTNMLK						18543000								8.70392e+06							3.81929e+06	8.70392e+06	3.15201e+06	1.82823e+07
Chromatin target of PRMT1 protein OS=Mus musculus GN=Chtop PE=1 SV=2	GHLDAELDAYMAQTDPETND		2913231			1060860	75883600				2913232			2.9279e+06	3.56191e+07			1.20277e+06	2913232	1.9631e+06	637218	2.9279e+06	3.56191e+07	8.89552e+06	2.1001e+06
Chromatin target of PRMT1 protein OS=Mus musculus GN=Chtop PE=1 SV=2	GLPIIQR						421487								197843							250257	197843	125768	255200
Chromatin target of PRMT1 protein OS=Mus musculus GN=Chtop PE=1 SV=2	LAQQMENRPSVQAALK		28647600			12887000	8998890				2.86476e+07			3.55672e+07	4.224e+06			9.42693e+06	2.86476e+07	1.90845e+07	2.2043e+07	3.55672e+07	4.224e+06	3.90806e+06	2.70298e+07
Chromatin target of PRMT1 protein OS=Mus musculus GN=Chtop PE=1 SV=2	LGKSNIQAR	2025978	131286625		30836200	4710720	297912504		27597500	1.05248e+07	131286626		1.22723e+08	1.30012e+07	1.39838e+08		5.15679e+07	1.05248e+07	131286626	6.48999e+07	1.22723e+08	1.30012e+07	1.39838e+08	3.86447e+07	5.15679e+07
Chromatin target of PRMT1 protein OS=Mus musculus GN=Chtop PE=1 SV=2	LGRPIGALAR						215982								101381							198317	101381	224902	184345
Chromatin target of PRMT1 protein OS=Mus musculus GN=Chtop PE=1 SV=2	LKQSLKQR		1856260								1.85626e+06							1.78591e+06	1.85626e+06	291775	9.51226e+06
Chromatin target of PRMT1 protein OS=Mus musculus GN=Chtop PE=1 SV=2	MAAQSAPKVVLK		158271			96583.3	2353210				158272			266566	1.10458e+06			122125	158272	174101	53402.8	266566	1.10458e+06	1.36752e+06	1.27637e+06
Chromatin target of PRMT1 protein OS=Mus musculus GN=Chtop PE=1 SV=2	MSLNER		27651642			8222230	168166627		1152520		27651643			2.26928e+07	7.8936e+07		2.15357e+06	2.92661e+07	27651643	8.95704e+06	5.6955e+07	2.26928e+07	7.8936e+07	1.07556e+07	2.15357e+06
Chromatin target of PRMT1 protein OS=Mus musculus GN=Chtop PE=1 SV=2	NKQPMPVNIR					6918390	481131							1.90943e+07	225839							1.90943e+07	225839	508327	4.62561e+06
Chromatin target of PRMT1 protein OS=Mus musculus GN=Chtop PE=1 SV=2	QPMPVNIR		12400554			4220000					1.24006e+07			1.16469e+07				1.38708e+07	1.24006e+07	1.75156e+07	1.92154e+07	1.16469e+07	1.39402e+07	7.04678e+06	1.38854e+07
Chromatin target of PRMT1 protein OS=Mus musculus GN=Chtop PE=1 SV=2	QRLGKSNIQAR						3147160								1.47725e+06							1.14486e+06	1.47725e+06	2.57413e+06	1.09704e+06
Chromatin target of PRMT1 protein OS=Mus musculus GN=Chtop PE=1 SV=2	RLAQQMENRPSVQAALK		2745750				16657200				2745751				7.81875e+06			7.15359e+06	2745751	4.1629e+06	1.42873e+06	1.38452e+07	7.81875e+06	1.40389e+07	2.13891e+07
Chromatin target of PRMT1 protein OS=Mus musculus GN=Chtop PE=1 SV=2	RLAQQMENRPSVQAALKLK						1026800								481971							555007	481971	103247	249176
Chromatin target of PRMT1 protein OS=Mus musculus GN=Chtop PE=1 SV=2	SNIQAR					17607200		6633140						4.85946e+07		1.35092e+06						4.85946e+07	7.12339e+06	1.35092e+06	2.66484e+06
Chromatin target of PRMT1 protein OS=Mus musculus GN=Chtop PE=1 SV=2	STTKMSLNER		6628950			229745	28498693				6.62895e+06			634082	1.3377e+07			8.46695e+06	6.62895e+06	1.92171e+06	6.39862e+06	634082	1.3377e+07	6.76574e+06	9.90997e+06
Chromatin target of PRMT1 protein OS=Mus musculus GN=Chtop PE=1 SV=2	TKGHLDAELDAYMAQTDPETND		1154620				603898	426277			1154621				283465	86816.9		529196	1154621	1.118e+06	1.20016e+06	246396	283465	86816.9	79289.6
Chromatin target of PRMT1 protein OS=Mus musculus GN=Chtop PE=1 SV=2	VVLKSTTK		13456400			121701					13456401			335889				2.61021e+07	13456401	1.08065e+07	3.64115e+07	335889	1.55099e+06	1.18349e+06	259391
Chromodomain-helicase-DNA-binding protein 1 OS=Mus musculus GN=Chd1 PE=1 SV=3	DAELVDKSETDLRR			1513860								364628						111750	173799	364628	713103
Chromodomain-helicase-DNA-binding protein 1 OS=Mus musculus GN=Chd1 PE=1 SV=3	GSVEEDILER							334543								68134.1						156153	48907.5	68134.1	17218.7
Chromodomain-helicase-DNA-binding protein 1 OS=Mus musculus GN=Chd1 PE=1 SV=3	ISGVQVNAK							902284								183762						290764	238680	183762	365934
Chromodomain-helicase-DNA-binding protein 1 OS=Mus musculus GN=Chd1 PE=1 SV=3	SSPSILAVQR			1619540				2809580				390082				572207		482920	145044	390082	1.66003e+06	442971	1.19653e+06	572207	4.09032e+06
Chromodomain-helicase-DNA-binding protein 4 OS=Mus musculus GN=Chd4 PE=1 SV=1	AFLNAIMR						178952								83999							162554	83999	117096	90204.3
Chromodomain-helicase-DNA-binding protein 4 OS=Mus musculus GN=Chd4 PE=1 SV=1	IDGGITGNMR						603897								283464							173323	283464	543914	321274
Chromodomain-helicase-DNA-binding protein 4 OS=Mus musculus GN=Chd4 PE=1 SV=1	IGVMSLIR						230794								108333							386319	108333	37021	311734
Chromodomain-helicase-DNA-binding protein 4 OS=Mus musculus GN=Chd4 PE=1 SV=1	LANRAPEPPPQQVAQQQ						2270260								1.06564e+06							750992	1.06564e+06	1.36522e+06	817467
Chromodomain-helicase-DNA-binding protein 4 OS=Mus musculus GN=Chd4 PE=1 SV=1	NFEALNAR						1247480								585557							309907	585557	616222	559995
Chromodomain-helicase-DNA-binding protein 4 OS=Mus musculus GN=Chd4 PE=1 SV=1	VGGNIEVLGFNAR						1625360								762930							615434	762930	896514	579803
Chromosome transmission fidelity protein 8 homolog isoform 2 OS=Mus musculus GN=Chtf8 PE=2 SV=1	AGGLGPGPNLDNR		4546628				7.77884e+06				4.54663e+06				3.65132e+06			5.95778e+06	4.54663e+06	3.00561e+06	1.11178e+08	5.81404e+07	3.65132e+06	4.03617e+06	2.44282e+06
Chromosome transmission fidelity protein 8 homolog isoform 2 OS=Mus musculus GN=Chtf8 PE=2 SV=1	AGGLLGASPDPR		6595771				11127500				6.59577e+06				5.22315e+06			2.07375e+07	6.59577e+06	4.4563e+06	1.2234e+07	2.86523e+06	5.22315e+06	5.34808e+06	1.15766e+07
Chromosome transmission fidelity protein 8 homolog isoform 2 OS=Mus musculus GN=Chtf8 PE=2 SV=1	AGVLSSGTGPPNPRPVGLGPGPSPNLR		1743250				3998610				1.74325e+06				1.87691e+06			1.37754e+06	1.74325e+06	7.87454e+06	1.75455e+06	5.20989e+06	1.87691e+06	1.30671e+06	9.69989e+06
Chromosome transmission fidelity protein 8 homolog isoform 2 OS=Mus musculus GN=Chtf8 PE=2 SV=1	GTGSGGLNPNAFSQSSGTLASNPGTFQR		1559190				1394120				1.55919e+06				654388			2.00587e+06	1.55919e+06	3.31575e+06	5.61889e+06	2.99024e+06	654388	437360	1.11302e+06
Chromosome transmission fidelity protein 8 homolog isoform 2 OS=Mus musculus GN=Chtf8 PE=2 SV=1	LGGLPGPGPMANPR						847926								398010							730348	398010	647154	636331
Chromosome transmission fidelity protein 8 homolog isoform 2 OS=Mus musculus GN=Chtf8 PE=2 SV=1	SGMFPGPGLGPNPR						651511								305814							236156	305814	992724	526790
Chromosome transmission fidelity protein 8 homolog isoform 2 OS=Mus musculus GN=Chtf8 PE=2 SV=1	SSFLGTNPAPR		6281423			86967.3	8999560				6.28142e+06			240026	4.22432e+06			1.39602e+07	6.28142e+06	1.19693e+07	3.8303e+06	240026	4.22432e+06	2.92697e+06	903001
Chromosome transmission fidelity protein 8 homolog isoform 2 OS=Mus musculus GN=Chtf8 PE=2 SV=1	TGALPGPGPMSNPR						908139								426273							775013	426273	589451	143401
Chromosome transmission fidelity protein 8 homolog isoform 2 OS=Mus musculus GN=Chtf8 PE=2 SV=1	VPGPIGPNTGPSSR						3002010								1.40912e+06							533262	1.40912e+06	1.57693e+06	3.61935e+06
Chromosome-associated kinesin KIF4 OS=Mus musculus GN=Kif4 PE=1 SV=3	GLSEAAGQTAQMLER						493130								231471							23490.4	231471	199182	143644
Chromosome-associated kinesin KIF4 OS=Mus musculus GN=Kif4 PE=1 SV=3	MMKNQRVQLMRQMK				249575								993271					4.42625e+06	1.49231e+06	2.45375e+06	993271
Chromosome-associated kinesin KIF4 OS=Mus musculus GN=Kif4 PE=1 SV=3	SAQIADLQQK						761480								357433							402747	357433	1.04557e+06	627742
Chromosome-associated kinesin KIF4 OS=Mus musculus GN=Kif4 PE=1 SV=3	TVASTAMNSQSSR						1032850								484811							182307	484811	634334	1.92092e+06
Cleavage and polyadenylation specificity factor subunit 3 OS=Mus musculus GN=Cpsf3 PE=1 SV=2	LYEALTPVH				528949								2.10513e+06					2.04775e+06	3.04213e+06	2.05044e+06	2.10513e+06
Cofilin-1 OS=Mus musculus GN=Cfl1 PE=1 SV=3	ASGVAVSDGVIK		1351825	191317			1607490				1.35183e+06	46080.7			754542			94027	1.35183e+06	46080.7	520989	1.8604e+06	754542	388335	1.76524e+06
Cofilin-1 OS=Mus musculus GN=Cfl1 PE=1 SV=3	ASGVAVSDGVIKVFNDMKVR		502129								502130							108082	502130	385463	174942
Coiled-coil and C2 domain-containing protein 1A OS=Mus musculus GN=Cc2d1a PE=1 SV=2	APLIPASSR						1084120								508877							164469	508877	284983	786188
Coiled-coil and C2 domain-containing protein 1A OS=Mus musculus GN=Cc2d1a PE=1 SV=2	IREPLTAQQLETTTER		1063010				1157610				1.06301e+06				543373			1.96138e+06	1.06301e+06	1.34712e+06	3.03613e+06	860784	543373	287005	559173
Coiled-coil and C2 domain-containing protein 1A OS=Mus musculus GN=Cc2d1a PE=1 SV=2	LTLYQSALESAR						459072								215485							611430	215485	315658	881880
Coiled-coil and C2 domain-containing protein 1A OS=Mus musculus GN=Cc2d1a PE=1 SV=2	RPVPPEVAQQYQDVVQR		1079300				1427690				1.0793e+06				670146			424725	1.0793e+06	1.15608e+06	1.75306e+06	3.42736e+06	670146	757123	731692
Coiled-coil and C2 domain-containing protein 1A OS=Mus musculus GN=Cc2d1a PE=1 SV=2	SFDPVLEALSR						168544								79113.6							68029.8	79113.6	68769.3	23687.5
Complement C1q subcomponent subunit B OS=Mus musculus GN=C1qb PE=1 SV=2	GNLCVNLVR		1851180								1.85118e+06							1.01456e+06	1.85118e+06	3.57897e+06	4.29103e+06
Complement C1q subcomponent subunit B OS=Mus musculus GN=C1qb PE=1 SV=2	VAFSALR		4796600				1858180				4.7966e+06				872214			1.58337e+07	4.7966e+06	527769	7.50255e+06	1.42948e+06	872214	2.29368e+06	2.13978e+06
Complement C1q subcomponent subunit B OS=Mus musculus GN=C1qb PE=1 SV=2	VITNANENYEPR	305166	10603600			1881810	2402470			1.58532e+06	1.06036e+07			5.19366e+06	1.1277e+06			1.58532e+06	1.06036e+07	4.42928e+06	5.18772e+06	5.19366e+06	1.1277e+06	1.99386e+06	1.29655e+06
Complement C1q subcomponent subunit C OS=Mus musculus GN=C1qc PE=2 SV=2	QTTQYPEANALVR		118501								118502							158511	118502	127261	197963
Complement C1q subcomponent subunit C OS=Mus musculus GN=C1qc PE=2 SV=2	QVSSGGVLLR		345424				254144				345425				119293			75694.2	345425	252674	663936	31470.4	119293	60584.6	313532
Constitutive coactivator of PPAR-gamma-like protein 1 OS=Mus musculus GN=FAM120A PE=1 SV=2	AVADYVR						654130								307043							29543.9	307043	247206	207645
Constitutive coactivator of PPAR-gamma-like protein 1 OS=Mus musculus GN=FAM120A PE=1 SV=2	TDDKVIR				245978		250606						978955		117633			536982	226662	2.68649e+06	978955	90559	117633	108184	898045
Core histone macro-H2A.1 OS=Mus musculus GN=H2afy PE=1 SV=3	AASADSTTEGTPTDGFTVLSTK			984274				1508990				237072				307325		48336.7	78560.6	237072	96687.8	363634	205507	307325	255480
Core histone macro-H2A.1 OS=Mus musculus GN=H2afy PE=1 SV=3	GVTIASGGVLPNIHPELLAK			841372								202653						388103	102540	202653	242792
Core histone macro-H2A.1 OS=Mus musculus GN=H2afy PE=1 SV=3	NCLALADDR			416544								100329						15591.9	76326.4	100329	165680
Core histone macro-H2A.1 OS=Mus musculus GN=H2afy PE=1 SV=3	SIAFPSIGSGR			4193060								1.00994e+06						429971	2.46923e+06	1.00994e+06	3.00216e+06
Coronin-1A OS=Mus musculus GN=Coro1a PE=1 SV=5	ATPEPSGTPSSDTVSR						266624								125151							487336	125151	406044	42479.4
Coronin-1A OS=Mus musculus GN=Coro1a PE=1 SV=5	DAGPLLISLK		1062540								1.06254e+06							644683	1.06254e+06	774158	433463
Coronin-1A OS=Mus musculus GN=Coro1a PE=1 SV=5	DGALICTSCR		627493								627494							643360	627494	296984	825454
Coronin-1A OS=Mus musculus GN=Coro1a PE=1 SV=5	VIEPR		4362310		1613240		7852810				4.36231e+06		6.42043e+06		3.68604e+06			3.26913e+06	4.36231e+06	3.31906e+07	6.42043e+06	2.43075e+06	3.68604e+06	3.10552e+06	6.72193e+06
Coronin-1C OS=Mus musculus GN=Coro1c PE=1 SV=2	AIFLADGNVFTTGFSR		1603835	2911309			4707140	3164217			1.60384e+06	701216			2.20949e+06	644433		2.93317e+06	1.60384e+06	701216	334742	2.93115e+06	2.20949e+06	644433	542247
Coronin-1C OS=Mus musculus GN=Coro1c PE=1 SV=2	NADPILISLK							328918								66988.5						24009.8	110211	66988.5	89814.2
Coronin-1C OS=Mus musculus GN=Coro1c PE=1 SV=2	QLALWNPK			758653								182729						114493	146037	182729	153635
Coronin-1C OS=Mus musculus GN=Coro1c PE=1 SV=2	VIDPR			2852840			5234490					687133			2.45702e+06			787761	568081	687133	555984	1.16382e+07	2.45702e+06	6.41567e+06	3.24127e+06
Coronin-1C OS=Mus musculus GN=Coro1c PE=1 SV=2	VTWDSSFCAVNPR			307880			620903	516304				74156			291447	105152		187281	73330.7	74156	25447.6	333867	291447	105152	635300
CpG-binding protein OS=Mus musculus GN=Cxxc1 PE=2 SV=1	IYEILPQR						761360								357376							791081	357376	895764	1.02401e+06
CpG-binding protein OS=Mus musculus GN=Cxxc1 PE=2 SV=1	RPPPTQQQPQQSQK						589806								276850							218749	276850	169497	360344
Crooked neck-like protein 1 OS=Mus musculus GN=Crnkl1 PE=2 SV=1	AASTAAGKQR					158978								438771								438771	315659	423832	275966
Crooked neck-like protein 1 OS=Mus musculus GN=Crnkl1 PE=2 SV=1	LVESDAEADTVREVYER			131422								31654.5						16400.2	25470.5	31654.5	10674.1
Cyclin-T1 OS=Mus musculus GN=Ccnt1 PE=1 SV=3	AKHAEELAAQKR						991179								465251							838347	465251	629656	591453
Cyclin-T1 OS=Mus musculus GN=Ccnt1 PE=1 SV=3	FGVDSDKELSYR						659784								309697							157902	309697	404518	1.00255e+06
Cyclin-T1 OS=Mus musculus GN=Ccnt1 PE=1 SV=3	HAEELAAQKR						899907								422409							244336	422409	360246	94382.8
Cyclin-T1 OS=Mus musculus GN=Ccnt1 PE=1 SV=3	TSESLALIGVDHSLQQDGSSAFGSQK						1354940								635998							560482	635998	1.24014e+06	421962
Cyclin-T1 OS=Mus musculus GN=Ccnt1 PE=1 SV=3	TYSLSSTLSSSSSTR						863281								405217							640525	405217	550045	901797
Cyclin-dependent kinase 9 OS=Mus musculus GN=Cdk9 PE=1 SV=1	AANVLITR						817761								383850							217664	383850	94509.7	883475
Cyclin-dependent kinase 9 OS=Mus musculus GN=Cdk9 PE=1 SV=1	GSQITQQSTNQSR						391788								183902							49069	183902	156385	384085
Cyclin-dependent kinase 9 OS=Mus musculus GN=Cdk9 PE=1 SV=1	LADFGLAR						873680								410098							1.89238e+06	410098	413120	165933
Cyclin-dependent kinase 9 OS=Mus musculus GN=Cdk9 PE=1 SV=1	LLVLDPAQR						246792								115842							187782	115842	316661	49446.4
Cyclin-dependent kinase 9 OS=Mus musculus GN=Cdk9 PE=1 SV=1	NPATTNQTEFER						164428								77181.5							36583.6	77181.5	172235	13383.9
Cyclin-dependent kinase 9 OS=Mus musculus GN=Cdk9 PE=1 SV=1	NPATTNQTEFERVF						263511								123690							61551.6	123690	105044	139614
Cysteine-rich protein 2-binding protein OS=Mus musculus GN=Csrp2bp PE=2 SV=2	ILDRYQTALPAR						206006								96697.9							130320	96697.9	169584	88721.4
Cysteine-rich protein 2-binding protein OS=Mus musculus GN=Csrp2bp PE=2 SV=2	LAAGQATYR						715985								336078							92310.2	336078	638649	100497
Cytospin-A OS=Mus musculus GN=Specc1l PE=1 SV=1	HSISGPISTSKPLTALSDKR							8751560								1.78237e+06						779415	4.97587e+06	1.78237e+06	1.19777e+06
Cytospin-A OS=Mus musculus GN=Specc1l PE=1 SV=1	KLPSVSQGANDVALAKR							2720480								554060						181726	332242	554060	374835
Cytospin-A OS=Mus musculus GN=Specc1l PE=1 SV=1	SFDSASQVPNAAAAAIPR							3785360								770936						1.55746e+06	149130	770936	4.05711e+06
DNA methyltransferase 1-associated protein 1 OS=Mus musculus GN=Dmap1 PE=1 SV=1	AAEEGKDYPFAR						780224								366231							184145	366231	75652.5	762881
DNA methyltransferase 1-associated protein 1 OS=Mus musculus GN=Dmap1 PE=1 SV=1	ATGADVRDILELGGPEGDAASGTISKK						4298950								2.01789e+06							602646	2.01789e+06	611613	3.21434e+06
DNA methyltransferase 1-associated protein 1 OS=Mus musculus GN=Dmap1 PE=1 SV=1	IPVFDAGHER						638517								299715							123092	299715	533039	1.14469e+06
DNA methyltransferase 1-associated protein 1 OS=Mus musculus GN=Dmap1 PE=1 SV=1	LITAADTTAEQR		1179580	92872.4			2124400				1.17958e+06	22369.4			997175			395168	1.17958e+06	22369.4	52609.3	1.43923e+06	997175	1.94196e+06	4.1479e+06
DNA methyltransferase 1-associated protein 1 OS=Mus musculus GN=Dmap1 PE=1 SV=1	SDLVLLYELK		291077				479948				291078				225284			465360	291078	196201	199781	182204	225284	1.08858e+06	754957
DNA methyltransferase 1-associated protein 1 OS=Mus musculus GN=Dmap1 PE=1 SV=1	SVEDLKER						781750								366947							129998	366947	519838	345339
DNA replication licensing factor MCM3 OS=Mus musculus GN=Mcm3 PE=1 SV=2	AGTVVLDDVELR		1518850				2192430				1518851				1.02911e+06			1.32119e+06	1518851	898191	1.68339e+06	384340	1.02911e+06	644485	967656
DNA replication licensing factor MCM3 OS=Mus musculus GN=Mcm3 PE=1 SV=2	AILCLLLGGVER				15762.6								62736.5					22155	65907.5	105520	62736.5
DNA replication licensing factor MCM3 OS=Mus musculus GN=Mcm3 PE=1 SV=2	CSVLAAANPVYGR				120806								480792					658871	525769	358230	480792
DNA replication licensing factor MCM3 OS=Mus musculus GN=Mcm3 PE=1 SV=2	DIQPAFSADDIAK						636133		726493						298596		1.35751e+06					2.5885e+06	298596	1.52007e+06	1.35751e+06
DNA replication licensing factor MCM3 OS=Mus musculus GN=Mcm3 PE=1 SV=2	ELISDNQYR					153180								422768								422768	2.38152e+06	289371	475655
DNA replication licensing factor MCM3 OS=Mus musculus GN=Mcm3 PE=1 SV=2	GSSGVGLTAAVTTDQETGER		260090								260091							220159	260091	72219.9	376525
DNA replication licensing factor MCM3 OS=Mus musculus GN=Mcm3 PE=1 SV=2	IQVVGTYR								351328								656484					155955	370331	2.49409e+06	656484
DNA replication licensing factor MCM3 OS=Mus musculus GN=Mcm3 PE=1 SV=2	SKDVFEQLAR				372993								1.48445e+06					249116	3.99523e+06	444841	1.48445e+06
DNA replication licensing factor MCM3 OS=Mus musculus GN=Mcm3 PE=1 SV=2	YVLCTAPR		242089								242090							362433	242090	653904	75012.7
DNA replication licensing factor MCM5 OS=Mus musculus GN=Mcm5 PE=2 SV=1	AGITTTLNSR				1022190								4.06815e+06					8.83031e+06	4.61891e+06	3.57502e+06	4.06815e+06
DNA replication licensing factor MCM5 OS=Mus musculus GN=Mcm5 PE=2 SV=1	GSSAAGLTASVIRDPSSR				124984								497419					788654	177679	1.66252e+06	497419
DNA replication licensing factor MCM5 OS=Mus musculus GN=Mcm5 PE=2 SV=1	LAALPNIYELISK		260439								260440							284603	260440	816019	1.07448e+06
DNA replication licensing factor MCM5 OS=Mus musculus GN=Mcm5 PE=2 SV=1	LSAEAAEKLK				315870								1.25711e+06					2.12219e+06	465399	1.39319e+06	1.25711e+06
DNA replication licensing factor MCM5 OS=Mus musculus GN=Mcm5 PE=2 SV=1	VLGIQVDTDGSGR				748215		578551						2.97777e+06		271567			1.45928e+06	1.06241e+06	2.99252e+06	2.97777e+06	313280	271567	402653	350050
DNA replication licensing factor MCM7 OS=Mus musculus GN=Mcm7 PE=2 SV=1	AGILTTLNAR		246677								246678							340703	246678	38198.3	268657
DNA replication licensing factor MCM7 OS=Mus musculus GN=Mcm7 PE=2 SV=1	IAQPGDHVSVTGIFLPVLR		619897								619898							519967	619898	715269	1.48958e+06
DNA topoisomerase 2-alpha OS=Mus musculus GN=Top2a PE=1 SV=2	ELILFSNSDNER		553226								553227							892014	553227	597011	605356
DNA topoisomerase 2-alpha OS=Mus musculus GN=Top2a PE=1 SV=2	IFDEILVNAADNK				244143								971652					867273	3.00763e+06	189546	971652
DNA topoisomerase 2-alpha OS=Mus musculus GN=Top2a PE=1 SV=2	ILNVR		3559170				2443060				3.55917e+06				1.14675e+06			1.39434e+07	3.55917e+06	6.10147e+06	9.57749e+06	7.86296e+06	1.14675e+06	271667	606653
DNA topoisomerase 2-alpha OS=Mus musculus GN=Top2a PE=1 SV=2	KVLFTCFKR							900671								183433						56503.4	202129	183433	51191.2
DNA topoisomerase 2-alpha OS=Mus musculus GN=Top2a PE=1 SV=2	TLAVSGLGVVGR		1194551				1265374				1.19455e+06				593956			212823	1.19455e+06	440788	515734	577466	593956	729107	343437
DNA topoisomerase 2-alpha OS=Mus musculus GN=Top2a PE=1 SV=2	VIHEQVNPR		718892				892060				718893				418726			1.74302e+06	718893	1.13171e+06	2.43483e+06	297349	418726	1.30378e+06	158713
DNA topoisomerase 2-alpha OS=Mus musculus GN=Top2a PE=1 SV=2	VLIQR		1301880								1.30188e+06							747225	1.30188e+06	2.31217e+06	2.80074e+06
DNA topoisomerase 2-alpha OS=Mus musculus GN=Top2a PE=1 SV=2	YIFTMLSPLAR						533323								250338							152164	250338	235272	672573
DNA topoisomerase 2-beta OS=Mus musculus GN=Top2b PE=1 SV=2	ELILFSNSDNER		553226								553227							740879	553227	2.19073e+06	941813
DNA topoisomerase 2-beta OS=Mus musculus GN=Top2b PE=1 SV=2	ILNVR		3559170				2443060				3.55917e+06				1.14675e+06			474803	3.55917e+06	1.4384e+06	1.83096e+06	884863	1.14675e+06	1.17931e+06	552739
DNA topoisomerase 2-beta OS=Mus musculus GN=Top2b PE=1 SV=2	SLAVSGLGVIGR		972036				411900	310945			972037				193343	63328.1		1.20983e+06	972037	2.76928e+06	2.50744e+06	85086.7	193343	63328.1	1.01778e+06
DNA-binding protein SATB1 OS=Mus musculus GN=Satb1 PE=1 SV=2	AGISQAVFAR					96479460	705703100	2067713	238455170					2.66276e+08	3.31251e+08	421116	4.45571e+08					2.66276e+08	3.31251e+08	421116	4.45571e+08
DNA-binding protein SATB1 OS=Mus musculus GN=Satb1 PE=1 SV=2	AKVSQALFAK						136588066		14196988						6.41133e+07		2.65281e+07					8.8316e+06	6.41133e+07	1.24507e+07	2.65281e+07
DNA-binding protein SATB1 OS=Mus musculus GN=Satb1 PE=1 SV=2	AMQNFLQLPEAER					328164	60058189							905713	2.81908e+07							905713	2.81908e+07	1.30524e+07	1.50218e+07
DNA-binding protein SATB1 OS=Mus musculus GN=Satb1 PE=1 SV=2	AMQNFLQLPEAERDR						206705670								9.70258e+07							5.30125e+07	9.70258e+07	2.01326e+08	1.70784e+08
DNA-binding protein SATB1 OS=Mus musculus GN=Satb1 PE=1 SV=2	CQEFGR						5201841								2.4417e+06							764863	2.4417e+06	1.45357e+07	1.60729e+06
DNA-binding protein SATB1 OS=Mus musculus GN=Satb1 PE=1 SV=2	DLEESVQDK					4321110	43966730		1768610					1.1926e+07	2.06376e+07		3.30478e+06					1.1926e+07	2.06376e+07	1.57876e+07	3.30478e+06
DNA-binding protein SATB1 OS=Mus musculus GN=Satb1 PE=1 SV=2	DLEESVQDKNANTLFSVK						10884845		3444820						5.10925e+06		6.4369e+06					8.65827e+06	5.10925e+06	1.94963e+06	6.4369e+06
DNA-binding protein SATB1 OS=Mus musculus GN=Satb1 PE=1 SV=2	DLLKDMNQSSLAK						5833960								2.73841e+06							1.61575e+06	2.73841e+06	2.2544e+06	5.32875e+06
DNA-binding protein SATB1 OS=Mus musculus GN=Satb1 PE=1 SV=2	DMMVEMDSLSELSQQGANHVNFGQQPVPGNTAEQPPSPAQLSHGSQPSVR						20578400								9.65932e+06							1.72453e+07	9.65932e+06	1.24465e+07	4.71908e+07
DNA-binding protein SATB1 OS=Mus musculus GN=Satb1 PE=1 SV=2	DMNQSSLAK					10835500	48317562							2.99052e+07	2.26798e+07							2.99052e+07	2.26798e+07	1.05469e+07	5.01619e+07
DNA-binding protein SATB1 OS=Mus musculus GN=Satb1 PE=1 SV=2	DNSGLEVDVAEYK					1065352	1670970		2350690					2.9403e+06	784339		4.39244e+06					2.9403e+06	784339	1.41396e+06	4.39244e+06
DNA-binding protein SATB1 OS=Mus musculus GN=Satb1 PE=1 SV=2	DNSGLEVDVAEYKDEELLK						13448900								6.3128e+06							5.52174e+06	6.3128e+06	5.31095e+06	1.14445e+07
DNA-binding protein SATB1 OS=Mus musculus GN=Satb1 PE=1 SV=2	DRIYQDER						1380290								647897							400464	647897	326860	94569.3
DNA-binding protein SATB1 OS=Mus musculus GN=Satb1 PE=1 SV=2	DRIYQDERER						8766310								4.11483e+06							2.34988e+06	4.11483e+06	4.27004e+06	1.99676e+06
DNA-binding protein SATB1 OS=Mus musculus GN=Satb1 PE=1 SV=2	ECPLSQSMISSIVNSTYYANVSAAK						30739648								1.44289e+07							1.3783e+07	1.44289e+07	2.9389e+07	7.72277e+06
DNA-binding protein SATB1 OS=Mus musculus GN=Satb1 PE=1 SV=2	EDPSPENR						3556884								1.66957e+06							1.65878e+06	1.66957e+06	4.1081e+06	573285
DNA-binding protein SATB1 OS=Mus musculus GN=Satb1 PE=1 SV=2	EEDPKTASQSLLVNLR					323968	34323500		1368700					894131	1.61112e+07		2.55752e+06					894131	1.61112e+07	1.62349e+06	2.55752e+06
DNA-binding protein SATB1 OS=Mus musculus GN=Satb1 PE=1 SV=2	EEHAEFVLVR						7932410								3.7234e+06							1.60463e+07	3.7234e+06	2.64164e+06	1.58472e+06
DNA-binding protein SATB1 OS=Mus musculus GN=Satb1 PE=1 SV=2	EHSEMSNNVSDPK					325863	2040710							899361	957892							899361	957892	1.57771e+06	154763
DNA-binding protein SATB1 OS=Mus musculus GN=Satb1 PE=1 SV=2	FLSLPQPER					3358740	336767590		1096870					9.26988e+06	1.58076e+08		2.04958e+06					9.26988e+06	1.58076e+08	5.90368e+06	2.04958e+06
DNA-binding protein SATB1 OS=Mus musculus GN=Satb1 PE=1 SV=2	GLIQVGK					8311038	189949000							2.29379e+07	8.91604e+07							2.29379e+07	8.91604e+07	2.74629e+07	1.20801e+07
DNA-binding protein SATB1 OS=Mus musculus GN=Satb1 PE=1 SV=2	GPPAKIAR						597873								280637							68815.3	280637	105456	601058
DNA-binding protein SATB1 OS=Mus musculus GN=Satb1 PE=1 SV=2	GRLGSTGGK						58147900		138933						2.72941e+07		259608					2.48193e+06	2.72941e+07	2.43129e+06	259608
DNA-binding protein SATB1 OS=Mus musculus GN=Satb1 PE=1 SV=2	IARLEQNGSPLGR						30422646								1.42801e+07							2.33714e+07	1.42801e+07	7.19116e+06	4.27503e+07
DNA-binding protein SATB1 OS=Mus musculus GN=Satb1 PE=1 SV=2	IQLHSCPK					6129350								1.69166e+07								1.69166e+07	1.80571e+07	8.12209e+06	6.96559e+06
DNA-binding protein SATB1 OS=Mus musculus GN=Satb1 PE=1 SV=2	IQLHSCPKLEDLPPEQWSHTTVR						5386170								2.52822e+06							1.19448e+07	2.52822e+06	3.25566e+06	5.15842e+06
DNA-binding protein SATB1 OS=Mus musculus GN=Satb1 PE=1 SV=2	IYQDER						25222940								1.18394e+07							1.42251e+07	1.18394e+07	2.5842e+06	4.76893e+07
DNA-binding protein SATB1 OS=Mus musculus GN=Satb1 PE=1 SV=2	IYQDERER					3738580								1.03182e+07								1.03182e+07	4.04716e+07	6.42559e+07	3.53561e+06
DNA-binding protein SATB1 OS=Mus musculus GN=Satb1 PE=1 SV=2	KEEDPKTASQSLLVNLR						160500090		7834590						7.53373e+07		1.46395e+07					1.81201e+07	7.53373e+07	6.77762e+07	1.46395e+07
DNA-binding protein SATB1 OS=Mus musculus GN=Satb1 PE=1 SV=2	LEDLPPEQWSHTTVR						10447663								4.90404e+06							4.2881e+06	4.90404e+06	9.5979e+06	8.54865e+06
DNA-binding protein SATB1 OS=Mus musculus GN=Satb1 PE=1 SV=2	LEEELSVEGSTDVNADLKD						178811								83932.8							57011.3	83932.8	51833	728969
DNA-binding protein SATB1 OS=Mus musculus GN=Satb1 PE=1 SV=2	LEQNGSPLGR					34764220	96309850	574009	20951010					9.59467e+07	4.5207e+07	116904	3.91485e+07					9.59467e+07	4.5207e+07	116904	3.91485e+07
DNA-binding protein SATB1 OS=Mus musculus GN=Satb1 PE=1 SV=2	LKDNSGLEVDVAEYK						434931								204153							268617	204153	210819	139088
DNA-binding protein SATB1 OS=Mus musculus GN=Satb1 PE=1 SV=2	LKDNSGLEVDVAEYKDEELLK						17173300								8.061e+06							1.50861e+07	8.061e+06	8.46776e+06	8.097e+06
DNA-binding protein SATB1 OS=Mus musculus GN=Satb1 PE=1 SV=2	LLAQQSLNQQYLNHPPPVSR						1115440800	8933474	173920000						5.23578e+08	1.81941e+06	3.24982e+08					3.3879e+08	5.23578e+08	1.81941e+06	3.24982e+08
DNA-binding protein SATB1 OS=Mus musculus GN=Satb1 PE=1 SV=2	LPPRQPTVASSAESDEENR						99672050		2564330						4.67852e+07		4.79164e+06					4.29486e+06	4.67852e+07	1.34238e+07	4.79164e+06
DNA-binding protein SATB1 OS=Mus musculus GN=Satb1 PE=1 SV=2	LPPRQPTVASSAESDEENRQK						239731700		8252760						1.12528e+08		1.54209e+07					5.43812e+07	1.12528e+08	3.85407e+07	1.54209e+07
DNA-binding protein SATB1 OS=Mus musculus GN=Satb1 PE=1 SV=2	MDHLNEATQGK					456486	45775980							1.25987e+06	2.14868e+07							1.25987e+06	2.14868e+07	3.42537e+06	8.53211e+06
DNA-binding protein SATB1 OS=Mus musculus GN=Satb1 PE=1 SV=2	MDHLNEATQGKEHSEMSNNVSDPKGPPAK						4348920								2.04135e+06							581965	2.04135e+06	2.48954e+06	2.46648e+06
DNA-binding protein SATB1 OS=Mus musculus GN=Satb1 PE=1 SV=2	MDHLNEATQGKEHSEMSNNVSDPKGPPAKIAR						526352								247066							72144.9	247066	254454	185475
DNA-binding protein SATB1 OS=Mus musculus GN=Satb1 PE=1 SV=2	MQGVPLK					5328650	46862445							1.47067e+07	2.19968e+07							1.47067e+07	2.19968e+07	8.11869e+06	1.53759e+07
DNA-binding protein SATB1 OS=Mus musculus GN=Satb1 PE=1 SV=2	NALKDLLK					128601	128629928		40409700					354932	6.03778e+07		7.55085e+07					354932	6.03778e+07	5.54154e+06	7.55085e+07
DNA-binding protein SATB1 OS=Mus musculus GN=Satb1 PE=1 SV=2	NANTLFSVK					8413440	14920100		8441410					2.32205e+07	7.00337e+06		1.57734e+07					2.32205e+07	7.00337e+06	1.39698e+07	1.57734e+07
DNA-binding protein SATB1 OS=Mus musculus GN=Satb1 PE=1 SV=2	NGKPENNTMNINASIYDEIQQEMK						710152								333340							1.24464e+06	333340	343965	115324
DNA-binding protein SATB1 OS=Mus musculus GN=Satb1 PE=1 SV=2	NGKPENNTMNINASIYDEIQQEMKR						1549830								727477							562628	727477	287707	574539
DNA-binding protein SATB1 OS=Mus musculus GN=Satb1 PE=1 SV=2	QPTVASSAESDEENR					3215232	19461549							8.87381e+06	9.13508e+06							8.87381e+06	9.13508e+06	1.03849e+07	1.30505e+07
DNA-binding protein SATB1 OS=Mus musculus GN=Satb1 PE=1 SV=2	QPTVASSAESDEENRQK					4664990	15545500		7234310					1.2875e+07	7.29692e+06		1.35178e+07					1.2875e+07	7.29692e+06	1.10301e+07	1.35178e+07
DNA-binding protein SATB1 OS=Mus musculus GN=Satb1 PE=1 SV=2	QPTVASSAESDEENRQKTRPR						1142930								536482							215563	536482	411413	80216
DNA-binding protein SATB1 OS=Mus musculus GN=Satb1 PE=1 SV=2	RAGISQAVFAR								7168360								1.33946e+07					3.72673e+06	2.65657e+07	2.86464e+06	1.33946e+07
DNA-binding protein SATB1 OS=Mus musculus GN=Satb1 PE=1 SV=2	RFLSLPQPER						80744800		1693880						3.79009e+07		3.16514e+06					2.21541e+06	3.79009e+07	1.66089e+07	3.16514e+06
DNA-binding protein SATB1 OS=Mus musculus GN=Satb1 PE=1 SV=2	SLNAASAMGPAPLLSTPPSRPPQVK					9826060	695017710		47338200					2.71192e+07	3.26235e+08		8.84549e+07					2.71192e+07	3.26235e+08	1.07535e+08	8.84549e+07
DNA-binding protein SATB1 OS=Mus musculus GN=Satb1 PE=1 SV=2	SMNKPLEQQVSTNTEVSSEIYQWVR						3605470								1.69238e+06							1.78399e+06	1.69238e+06	580851	623165
DNA-binding protein SATB1 OS=Mus musculus GN=Satb1 PE=1 SV=2	SQGWLCELLR						42195509		1908110						1.98062e+07		3.56544e+06					2.14194e+07	1.98062e+07	6.03656e+06	3.56544e+06
DNA-binding protein SATB1 OS=Mus musculus GN=Satb1 PE=1 SV=2	TASQSLLVNLR		496800		238455	1.68546e+07	452543380		156511080		496801		949015	4.65176e+07	2.1242e+08		2.92452e+08	731625	496801	686278	949015	4.65176e+07	2.1242e+08	2.42049e+08	2.92452e+08
DNA-binding protein SATB1 OS=Mus musculus GN=Satb1 PE=1 SV=2	TATLATER					33260620	256167660	6473730	183836330					9.17969e+07	1.20243e+08	1.31846e+06	3.43512e+08					9.17969e+07	1.20243e+08	1.31846e+06	3.43512e+08
DNA-binding protein SATB1 OS=Mus musculus GN=Satb1 PE=1 SV=2	TLWENLSMIR						61372307								2.88076e+07							2.66287e+07	2.88076e+07	3.02767e+07	6.29215e+07
DNA-binding protein SATB1 OS=Mus musculus GN=Satb1 PE=1 SV=2	TLWENLSMIRR						96867198								4.54686e+07							1.24318e+07	4.54686e+07	6.38843e+07	3.50784e+07
DNA-binding protein SATB1 OS=Mus musculus GN=Satb1 PE=1 SV=2	TPLPNLHPGLVSTPISPQLVNQQLVMAQLLNQQYAVNR						21994600								1.03241e+07							1.78166e+06	1.03241e+07	7.1628e+07	1.89277e+07
DNA-binding protein SATB1 OS=Mus musculus GN=Satb1 PE=1 SV=2	TQGLLSEILR					150769	187935960		35319848					416114	8.82155e+07		6.59977e+07					416114	8.82155e+07	9.13641e+06	6.59977e+07
DNA-binding protein SATB1 OS=Mus musculus GN=Satb1 PE=1 SV=2	TQGLLSEILRK						37373200								1.75427e+07							2.2442e+07	1.75427e+07	1.93196e+07	8.19197e+06
DNA-binding protein SATB1 OS=Mus musculus GN=Satb1 PE=1 SV=2	VAATKSQGWLCELLR						1004285								471403							1.00298e+06	471403	744631	2.19851e+06
DNA-binding protein SATB1 OS=Mus musculus GN=Satb1 PE=1 SV=2	VAFNR					12088200								3.33626e+07								3.33626e+07	7.91909e+06	5.60301e+07	4.62327e+07
DNA-binding protein SATB1 OS=Mus musculus GN=Satb1 PE=1 SV=2	VAFNRTQGLLSEILR						18777190								8.81385e+06							3.52377e+06	8.81385e+06	9.15338e+06	3.46912e+06
DNA-binding protein SATB1 OS=Mus musculus GN=Satb1 PE=1 SV=2	VAFNRTQGLLSEILRKEEDPK						5946660								2.79131e+06							3.2013e+06	2.79131e+06	573587	3.33973e+06
DNA-binding protein SATB1 OS=Mus musculus GN=Satb1 PE=1 SV=2	VSQALFAK						177539760								8.33356e+07							2.11073e+07	8.33356e+07	2.41643e+07	1.23132e+08
DNA-binding protein SATB1 OS=Mus musculus GN=Satb1 PE=1 SV=2	WKEDPSPENR						4749760								2.2295e+06							2.42764e+06	2.2295e+06	3.25844e+06	5.37074e+06
DNA-binding protein SATB1 OS=Mus musculus GN=Satb1 PE=1 SV=2	YTIIK								17904600								3.3456e+07					8.62069e+06	1.46697e+07	1.23752e+07	3.3456e+07
DNA-binding protein SATB2 OS=Mus musculus GN=Satb2 PE=1 SV=1	AKVSQALFAK						133063000								6.24586e+07							1.99034e+08	6.24586e+07	1.88961e+08	4.84722e+07
DNA-binding protein SATB2 OS=Mus musculus GN=Satb2 PE=1 SV=1	DRIYQDER						1380290								647897							1.75856e+06	647897	422085	144765
DNA-binding protein SATB2 OS=Mus musculus GN=Satb2 PE=1 SV=1	DRIYQDERER						7337380								3.4441e+06							6.26548e+06	3.4441e+06	2.09937e+06	1.2994e+06
DNA-binding protein SATB2 OS=Mus musculus GN=Satb2 PE=1 SV=1	EEHAEFVLVR						7932410								3.7234e+06							5.71361e+06	3.7234e+06	1.46786e+06	1.11194e+07
DNA-binding protein SATB2 OS=Mus musculus GN=Satb2 PE=1 SV=1	IYQDER						21280100								9.98869e+06							9.1797e+06	9.98869e+06	4.43868e+07	8.56028e+06
DNA-binding protein SATB2 OS=Mus musculus GN=Satb2 PE=1 SV=1	KEEDPRTASQSLLVNLR						291208								136691							114979	136691	855963	848680
DNA-binding protein SATB2 OS=Mus musculus GN=Satb2 PE=1 SV=1	SQGWLCELLR						41370400								1.94189e+07							4.46525e+07	1.94189e+07	1.10201e+07	2.7662e+07
DNA-binding protein SATB2 OS=Mus musculus GN=Satb2 PE=1 SV=1	TASQSLLVNLR						374697000								1.7588e+08							1.80745e+08	1.7588e+08	4.67502e+08	1.13784e+08
DNA-binding protein SATB2 OS=Mus musculus GN=Satb2 PE=1 SV=1	TQGLLSEILR						172075000								8.07705e+07							1.4063e+08	8.07705e+07	7.58967e+07	2.56207e+07
DNA-binding protein SATB2 OS=Mus musculus GN=Satb2 PE=1 SV=1	TQGLLSEILRK						37373200								1.75427e+07							8.26865e+06	1.75427e+07	1.72157e+07	2.34244e+07
DNA-binding protein SATB2 OS=Mus musculus GN=Satb2 PE=1 SV=1	VAFNRTQGLLSEILR						15515700								7.28294e+06							5.69016e+06	7.28294e+06	1.79154e+07	7.22599e+06
DNA-binding protein SATB2 OS=Mus musculus GN=Satb2 PE=1 SV=1	VSQALFAK						158202000								7.42586e+07							1.11517e+08	7.42586e+07	3.50249e+07	4.30146e+07
DNA-directed RNA polymerase II subunit RPB2 OS=Mus musculus GN=Polr2b PE=2 SV=2	AGVSQVLNR						381132								178901							371701	178901	268096	100469
Death-associated protein kinase 1 OS=Mus musculus GN=Dapk1 PE=1 SV=3	EGETPLLTASAR			1766587				2048360				425499				417175		1.14918e+06	286127	425499	181519	1.19213e+06	102523	417175	1.23627e+06
Death-associated protein kinase 1 OS=Mus musculus GN=Dapk1 PE=1 SV=3	GLFIQQLRPTQNLQPR			1596820								384609						259364	1.04398e+06	384609	286398
Death-inducer obliterator 1 OS=Mus musculus GN=Dido1 PE=1 SV=4	ALPSASLVGR						1215090								570353							396191	570353	131501	325270
Death-inducer obliterator 1 OS=Mus musculus GN=Dido1 PE=1 SV=4	APTGSTPGPQGTLPAR						3769740								1.76948e+06							2.35416e+06	1.76948e+06	2.24422e+06	1.72102e+06
Death-inducer obliterator 1 OS=Mus musculus GN=Dido1 PE=1 SV=4	DLYLIPLSAKDPVPSK						595687								279611							163665	279611	158540	95572.8
Death-inducer obliterator 1 OS=Mus musculus GN=Dido1 PE=1 SV=4	EGAGDTEVDPSEQQPQQHNLSLR						1441870								676802							615731	676802	1.37694e+06	1.02982e+06
Death-inducer obliterator 1 OS=Mus musculus GN=Dido1 PE=1 SV=4	GLSPSYLGGPR						1908870								896007							841558	896007	191027	205223
Death-inducer obliterator 1 OS=Mus musculus GN=Dido1 PE=1 SV=4	GTHPGQFEGAR						903951								424307							758519	424307	586306	375494
Death-inducer obliterator 1 OS=Mus musculus GN=Dido1 PE=1 SV=4	IFQPVVEAPGAPK						2571680								1.20712e+06							1.56502e+06	1.20712e+06	2.09252e+06	1.64326e+06
Death-inducer obliterator 1 OS=Mus musculus GN=Dido1 PE=1 SV=4	KLPGSAAVVGVTR						2118710								994505							2.13036e+06	994505	417723	1.49163e+06
Death-inducer obliterator 1 OS=Mus musculus GN=Dido1 PE=1 SV=4	KPMSANVPAASPAPGR						3714720								1.74366e+06							636102	1.74366e+06	2.28748e+06	991503
Death-inducer obliterator 1 OS=Mus musculus GN=Dido1 PE=1 SV=4	LAAENTENESLPR						769566								361228							496482	361228	155662	1.53978e+06
Death-inducer obliterator 1 OS=Mus musculus GN=Dido1 PE=1 SV=4	LGPVSPAPSQPNSQIR		699583				8015050				699584				3.7622e+06			558207	699584	189267	962063	4.09029e+06	3.7622e+06	4.82939e+06	5.67645e+06
Death-inducer obliterator 1 OS=Mus musculus GN=Dido1 PE=1 SV=4	LQQEELETSVYPK						687941								322914							1.50155e+06	322914	284342	379339
Death-inducer obliterator 1 OS=Mus musculus GN=Dido1 PE=1 SV=4	QAGPTPMTAASK						340417								159789							407616	159789	72614.8	131799
Death-inducer obliterator 1 OS=Mus musculus GN=Dido1 PE=1 SV=4	QLEEQEEALRQQR						1465460								687875							1.12384e+06	687875	980093	361503
Death-inducer obliterator 1 OS=Mus musculus GN=Dido1 PE=1 SV=4	RPWPSATLSGTSAR						2166980								1.01716e+06							3.25344e+06	1.01716e+06	1.41776e+06	1.04405e+06
Death-inducer obliterator 1 OS=Mus musculus GN=Dido1 PE=1 SV=4	SGPVSDSLGKEHPASSEK						707296								331999							560971	331999	293498	653516
Death-inducer obliterator 1 OS=Mus musculus GN=Dido1 PE=1 SV=4	SVIESR						5737170								2.69298e+06							2.07986e+06	2.69298e+06	823657	2.19824e+06
Death-inducer obliterator 1 OS=Mus musculus GN=Dido1 PE=1 SV=4	TRLQQEELETSVYPK						1027580								482338							166550	482338	272138	2.45739e+06
Death-inducer obliterator 1 OS=Mus musculus GN=Dido1 PE=1 SV=4	TSEGGPAAAQA						1864450								875157							2.26075e+06	875157	1.13582e+06	2.41246e+06
Death-inducer obliterator 1 OS=Mus musculus GN=Dido1 PE=1 SV=4	VEEFLTTVR						438059								205622							34882.8	205622	195534	106130
Death-inducer obliterator 1 OS=Mus musculus GN=Dido1 PE=1 SV=4	VSATERPADFTTDASSASLVEQQK						743256								348878							115029	348878	594177	786972
Dedicator of cytokinesis protein 11 OS=Mus musculus GN=Dock11 PE=1 SV=1	DVQGSLDLDGR						343325								161154							151816	161154	272493	17661
Dedicator of cytokinesis protein 11 OS=Mus musculus GN=Dock11 PE=1 SV=1	IIQINTDSLVQEK						294041								138021							238603	138021	181519	219335
Dedicator of cytokinesis protein 11 OS=Mus musculus GN=Dock11 PE=1 SV=1	LVEPLDYENVITQR		411881				582751				411882				273539			616920	411882	421185	647454	456003	273539	454077	451176
Dedicator of cytokinesis protein 11 OS=Mus musculus GN=Dock11 PE=1 SV=1	NEASALLYLLMR		30050.1								30051.1							34613.7	30051.1	41390.2	103891
Dedicator of cytokinesis protein 11 OS=Mus musculus GN=Dock11 PE=1 SV=1	QSVSEAVR		808449				651517				808450				305817			2.02162e+06	808450	279594	1.25793e+06	696905	305817	150297	406607
Dedicator of cytokinesis protein 11 OS=Mus musculus GN=Dock11 PE=1 SV=1	SSVSQYNR						367789								172637							143436	172637	258283	206101
Dedicator of cytokinesis protein 11 OS=Mus musculus GN=Dock11 PE=1 SV=1	TVQSTVPEDAEKR						403192								189255							276945	189255	89494.4	297716
Dedicator of cytokinesis protein 11 OS=Mus musculus GN=Dock11 PE=1 SV=1	YAEIPDESR		224556								224557							295385	224557	423520	85391.4
Dedicator of cytokinesis protein 8 OS=Mus musculus GN=Dock8 PE=1 SV=4	AFDNIINKDHKR			2015980								485568						246575	1.10675e+06	485568	173682
Dedicator of cytokinesis protein 8 OS=Mus musculus GN=Dock8 PE=1 SV=4	AHTPSIDPSSQAR			1063410				10444800				256132				2.12722e+06		389609	390571	256132	534906	1.23246e+06	8.0044e+06	2.12722e+06	1.18027e+06
Dedicator of cytokinesis protein 8 OS=Mus musculus GN=Dock8 PE=1 SV=4	APDFNEEHLR							281621								57355.9						65596.8	16934.6	57355.9	216625
Dedicator of cytokinesis protein 8 OS=Mus musculus GN=Dock8 PE=1 SV=4	DVKAKLEEALLRGEGAR							1809810								368591						432403	825097	368591	414389
Dedicator of cytokinesis protein 8 OS=Mus musculus GN=Dock8 PE=1 SV=4	EILEFPIREVYVPHTVYR			1581260				3268790				380861				665730		348399	1.87483e+06	380861	827514	1.72984e+06	555834	665730	181779
Dedicator of cytokinesis protein 8 OS=Mus musculus GN=Dock8 PE=1 SV=4	ESTDVEPGVGR		1129600				3160260	8985700			1.1296e+06				1.4834e+06	1.83005e+06		2.63491e+06	1.1296e+06	1.01492e+06	793647	878257	1.4834e+06	1.83005e+06	635159
Dedicator of cytokinesis protein 8 OS=Mus musculus GN=Dock8 PE=1 SV=4	FGDLDEQEFVYKEPAITKLPEISHR							5042200								1.02691e+06						1.17355e+06	261678	1.02691e+06	564576
Dedicator of cytokinesis protein 8 OS=Mus musculus GN=Dock8 PE=1 SV=4	FMYTTPFTLEGRPR						375863								176427							687172	176427	154048	377895
Dedicator of cytokinesis protein 8 OS=Mus musculus GN=Dock8 PE=1 SV=4	GPLTSCDFDLR		504220					3018960			504221					614849		2.23221e+06	504221	305792	1.02702e+06	332019	885749	614849	279545
Dedicator of cytokinesis protein 8 OS=Mus musculus GN=Dock8 PE=1 SV=4	HPLNVLCDVSGKGPLTSCDFDLR							2249560								458151						236592	870147	458151	872418
Dedicator of cytokinesis protein 8 OS=Mus musculus GN=Dock8 PE=1 SV=4	IASMFDLTPEYR		522469				1260640				522470				591734			2.02845e+06	522470	280923	1.20673e+06	605397	591734	555017	3.6059e+06
Dedicator of cytokinesis protein 8 OS=Mus musculus GN=Dock8 PE=1 SV=4	KIPELYKPIFR			4252460				13545700				1.02424e+06				2.75875e+06		275228	1.98952e+06	1.02424e+06	847251	2.91223e+06	1.4073e+06	2.75875e+06	1.97971e+06
Dedicator of cytokinesis protein 8 OS=Mus musculus GN=Dock8 PE=1 SV=4	KKISENFHCDLNSDQFKGFLR							2782310								566653						171975	777457	566653	1.63071e+06
Dedicator of cytokinesis protein 8 OS=Mus musculus GN=Dock8 PE=1 SV=4	LCFKEFIMR			417098								100462						127312	114231	100462	48269.5
Dedicator of cytokinesis protein 8 OS=Mus musculus GN=Dock8 PE=1 SV=4	LITAEQR						2428160	7130110							1.13976e+06	1.45214e+06						3.34014e+06	1.13976e+06	1.45214e+06	611073
Dedicator of cytokinesis protein 8 OS=Mus musculus GN=Dock8 PE=1 SV=4	LKLQAESFCQR			1981420								477244						376095	280452	477244	149859
Dedicator of cytokinesis protein 8 OS=Mus musculus GN=Dock8 PE=1 SV=4	LPEISHR						465841								218662							279554	218662	546025	67418.6
Dedicator of cytokinesis protein 8 OS=Mus musculus GN=Dock8 PE=1 SV=4	LQAESFCQR							1942860								395688						1.36839e+06	360796	395688	148511
Dedicator of cytokinesis protein 8 OS=Mus musculus GN=Dock8 PE=1 SV=4	LQTGSYCLPVALEK			1180100				1993300				284238				405961		1.32289e+06	232435	284238	178511	659618	583203	405961	370168
Dedicator of cytokinesis protein 8 OS=Mus musculus GN=Dock8 PE=1 SV=4	NADQSLIR							2241770								456565						277093	498650	456565	395192
Dedicator of cytokinesis protein 8 OS=Mus musculus GN=Dock8 PE=1 SV=4	NLLYVYPQR		815568				1487740	3491280			815569				698333	711043		335019	815569	1.63812e+06	715202	343962	698333	711043	498580
Dedicator of cytokinesis protein 8 OS=Mus musculus GN=Dock8 PE=1 SV=4	QGASGESLLGYSWLPILLNER			1434010				2857240				345395				581913		168692	113138	345395	118516	373607	1.43221e+06	581913	516592
Dedicator of cytokinesis protein 8 OS=Mus musculus GN=Dock8 PE=1 SV=4	SGGPTTVVPDPR						6988480								3.28033e+06							5.31289e+06	3.28033e+06	9.65738e+06	4.09126e+06
Dedicator of cytokinesis protein 8 OS=Mus musculus GN=Dock8 PE=1 SV=4	SLQPDERLENLLQLVSAEDFEKEKEEAR			15326500				35743700				3.69153e+06				7.27966e+06		1.12e+07	730019	3.69153e+06	1.73557e+06	2.80926e+07	7.32199e+06	7.27966e+06	1.03006e+07
Dedicator of cytokinesis protein 8 OS=Mus musculus GN=Dock8 PE=1 SV=4	TLQKQTFESETLECSEPDTQTGPR							1922500								391542						459496	125629	391542	119808
Dedicator of cytokinesis protein 8 OS=Mus musculus GN=Dock8 PE=1 SV=4	TLQLAVATHQEPPDAK		1495660	2026050			2309620	8967610			1.49566e+06	487993			1.08412e+06	1.82637e+06		1.28234e+06	1.49566e+06	487993	737388	1.0997e+06	1.08412e+06	1.82637e+06	1.08046e+06
Dedicator of cytokinesis protein 8 OS=Mus musculus GN=Dock8 PE=1 SV=4	TRPHKEILEFPIREVYVPHTVYR			1212750				8272310				292102				1.68476e+06		410482	148006	292102	94307	1.32608e+06	859955	1.68476e+06	1.04503e+06
Dedicator of cytokinesis protein 8 OS=Mus musculus GN=Dock8 PE=1 SV=4	TSAAAVSSK							999873								203637						959796	97874.7	203637	119507
Dedicator of cytokinesis protein 8 OS=Mus musculus GN=Dock8 PE=1 SV=4	TSAAAVSSKLMQAR		235879								235880							374322	235880	618771	82908.7
Dedicator of cytokinesis protein 8 OS=Mus musculus GN=Dock8 PE=1 SV=4	VLHHCSSSMDVTR						439598								206344							522978	206344	678296	93169.2
Dedicator of cytokinesis protein 8 OS=Mus musculus GN=Dock8 PE=1 SV=4	VSQKEEFVLTPIEVAIEDMK						299840								140743							60183	140743	206258	77630.6
Desmoglein-4 OS=Mus musculus GN=Dsg4 PE=1 SV=1	TGEIQFSR	238219				922594				1.23754e+06				2.5463e+06				1.23754e+06	613549	2.76411e+06	370430	2.5463e+06	2.5741e+06	322972	2.35556e+06
Desmoplakin OS=Mus musculus GN=Dsp PE=2 SV=1	IEVLEEELR		252082								252083							536694	252083	408907	139994
Desmoplakin OS=Mus musculus GN=Dsp PE=2 SV=1	LLEAQIATGGIIDPK		272282			806205					272283			2.22507e+06				408752	272283	150805	338066	2.22507e+06	740327	706023	2.05442e+06
Desmoplakin OS=Mus musculus GN=Dsp PE=2 SV=1	QLQNIIQATSR			496569		340231	71873.1					119604		939016	33737.1			95519.5	46699.3	119604	187310	939016	33737.1	767919	84449.3
Developmentally-regulated GTP-binding protein 1 OS=Mus musculus GN=Drg1 PE=1 SV=1	GQLPDYTSPVVLPYSR		403279				609674				403280				286176			387937	403280	635601	307413	459490	286176	516844	264459
Developmentally-regulated GTP-binding protein 1 OS=Mus musculus GN=Drg1 PE=1 SV=1	GRQVIAVAR		162753								162754							356604	162754	1.16905e+06	72338.4
Developmentally-regulated GTP-binding protein 1 OS=Mus musculus GN=Drg1 PE=1 SV=1	IAEIEAEMAR		1319950				1489800				1319951				699300			2.5408e+06	1319951	1.55927e+06	495014	143371	699300	118411	5.20075e+06
Developmentally-regulated GTP-binding protein 1 OS=Mus musculus GN=Drg1 PE=1 SV=1	IGFVGFPSVGK		376210				626239				376211				293952			1.09955e+06	376211	1.3498e+06	346195	2.96997e+06	293952	281724	314697
Developmentally-regulated GTP-binding protein 1 OS=Mus musculus GN=Drg1 PE=1 SV=1	IIENELEGFGIR		424576				614433				424577				288410			105929	424577	303661	1.38277e+06	394983	288410	70176.4	119543
Developmentally-regulated GTP-binding protein 1 OS=Mus musculus GN=Drg1 PE=1 SV=1	QVIAVAR						796900								374058							767459	374058	212822	120647
Developmentally-regulated GTP-binding protein 1 OS=Mus musculus GN=Drg1 PE=1 SV=1	SDATADDLIDVVEGNR		388473				241242				388474				113237			4.00406e+06	388474	509807	1.1308e+06	154541	113237	262644	281528
DnaJ homolog subfamily B member 1 OS=Mus musculus GN=Dnajb1 PE=2 SV=3	DGSDVIYPAR		1914990				5519581				1.91499e+06				2.59084e+06			721986	1.91499e+06	3.39399e+06	2.58967e+06	4.71939e+06	2.59084e+06	3.31642e+06	5.5087e+06
DnaJ homolog subfamily B member 1 OS=Mus musculus GN=Dnajb1 PE=2 SV=3	EALCGCTVNVPTLDGR						1896020								889976							476898	889976	1.48014e+06	1.12418e+06
DnaJ homolog subfamily B member 1 OS=Mus musculus GN=Dnajb1 PE=2 SV=3	EGDQTSNNIPADIVFVLK						192422								90321.7							116533	90321.7	13189.4	1.07116e+06
DnaJ homolog subfamily B member 1 OS=Mus musculus GN=Dnajb1 PE=2 SV=3	EIAEAYDVLSDPR						1321220								620170							6.46191e+06	620170	1.26427e+06	669140
DnaJ homolog subfamily B member 1 OS=Mus musculus GN=Dnajb1 PE=2 SV=3	GASDDEIKR						835998								392411							487299	392411	982223	221513
DnaJ homolog subfamily B member 1 OS=Mus musculus GN=Dnajb1 PE=2 SV=3	GKDYYQTLGLAR						176449								82824.1							152646	82824.1	9377.96	290526
DnaJ homolog subfamily B member 1 OS=Mus musculus GN=Dnajb1 PE=2 SV=3	ILTIEVK						725937								340749							597667	340749	354983	528026
DnaJ homolog subfamily B member 1 OS=Mus musculus GN=Dnajb1 PE=2 SV=3	KKQDPPVTHDLR						1220460								572874							449287	572874	99266.3	686620
DnaJ homolog subfamily B member 1 OS=Mus musculus GN=Dnajb1 PE=2 SV=3	KQDPPVTHDLR						1561350								732885							1.89339e+06	732885	882887	376113
DnaJ homolog subfamily B member 1 OS=Mus musculus GN=Dnajb1 PE=2 SV=3	KVPGEGLPLPK						415226								194904							206984	194904	216067	167911
DnaJ homolog subfamily B member 1 OS=Mus musculus GN=Dnajb1 PE=2 SV=3	SRPSQEPTR		531788				19166700				531789				8.99668e+06			494812	531789	581317	978024	1.3787e+07	8.99668e+06	1.8612e+07	4.42006e+06
DnaJ homolog subfamily B member 1 OS=Mus musculus GN=Dnajb1 PE=2 SV=3	TILEQVLPI						6568150								3.08303e+06							1.34852e+06	3.08303e+06	1.46514e+06	1.26908e+06
DnaJ homolog subfamily B member 1 OS=Mus musculus GN=Dnajb1 PE=2 SV=3	VSLEEIYSGCTK						418176								196289							1.07676e+06	196289	118338	204799
DnaJ homolog subfamily B member 4 OS=Mus musculus GN=Dnajb4 PE=2 SV=1	DGSNIVYTAK						2118360								994340							8.26678e+06	994340	1.39455e+06	5.50962e+06
DnaJ homolog subfamily B member 4 OS=Mus musculus GN=Dnajb4 PE=2 SV=1	EVAEAYEVLSDPK						112143								52639.4							59779.5	52639.4	155836	363471
DnaJ homolog subfamily B member 4 OS=Mus musculus GN=Dnajb4 PE=2 SV=1	GGAGGTDGQGGTFR						573444								269170							230214	269170	118559	337293
DnaJ homolog subfamily B member 4 OS=Mus musculus GN=Dnajb4 PE=2 SV=1	VSLEEIYSGCTK						418176								196289							338919	196289	124815	337152
Dolichyl-diphosphooligosaccharide--protein glycosyltransferase 48 kDa subunit OS=Mus musculus GN=Ddost PE=1 SV=2	NTLLIAGLQAR		273751								273752							148146	273752	1.6332e+06	411659
Dolichyl-diphosphooligosaccharide--protein glycosyltransferase 48 kDa subunit OS=Mus musculus GN=Ddost PE=1 SV=2	SSLNPILFR		1089390				1443960				1.08939e+06				677783			1.8086e+06	1.08939e+06	680309	830510	1.43178e+06	677783	403320	968941
Dynamin-2 OS=Mus musculus GN=Dnm2 PE=1 SV=2	AALAAER		1103460								1.10346e+06							538830	1.10346e+06	289443	923836
Dynamin-2 OS=Mus musculus GN=Dnm2 PE=1 SV=2	EVDPQGLR		1348370				2165290				1.34837e+06				1.01637e+06			2.74752e+06	1.34837e+06	2.40345e+06	2.94011e+06	272122	1.01637e+06	1.34292e+06	2.0226e+06
Dynamin-2 OS=Mus musculus GN=Dnm2 PE=1 SV=2	GISPVPINLR		1215530								1.21553e+06							583422	1.21553e+06	993848	567471
Dynamin-2 OS=Mus musculus GN=Dnm2 PE=1 SV=2	GYIGVVNR						1298060								609299							769907	609299	2.56651e+06	724235
Dynamin-2 OS=Mus musculus GN=Dnm2 PE=1 SV=2	IEGSGDQVDTLELSGGAR		514309				995490				514310				467275			636648	514310	1.33263e+06	242873	297578	467275	732618	318005
Dynamin-2 OS=Mus musculus GN=Dnm2 PE=1 SV=2	SSVLENFVGR		75731.1				446705				75732.1				209680			122486	75732.1	26804.3	47275.5	155634	209680	100391	314180
Dynamin-2 OS=Mus musculus GN=Dnm2 PE=1 SV=2	TLNQQLTNHIR						744324								349380							310275	349380	199392	443677
E1A-binding protein p400 OS=Mus musculus GN=Ep400 PE=1 SV=3	AIQPQVAQGQAAVQQK						694059								325786							193801	325786	152623	348045
E1A-binding protein p400 OS=Mus musculus GN=Ep400 PE=1 SV=3	ALSPITSR		543127								543128							281691	543128	678682	832940
E1A-binding protein p400 OS=Mus musculus GN=Ep400 PE=1 SV=3	ALYEDVILQPR						1374470								645165							686945	645165	129461	1.05505e+06
E1A-binding protein p400 OS=Mus musculus GN=Ep400 PE=1 SV=3	DVEKQLTR						324727								152425							166318	152425	77271.6	136874
E1A-binding protein p400 OS=Mus musculus GN=Ep400 PE=1 SV=3	EVAAQGNDYSMAFLTQR						721201								338526							148979	338526	579194	535795
E1A-binding protein p400 OS=Mus musculus GN=Ep400 PE=1 SV=3	FSAPSLLYGALR						57863.8								27161.2							24090.5	27161.2	35460.8	52411.1
E1A-binding protein p400 OS=Mus musculus GN=Ep400 PE=1 SV=3	HGEAVVPPR		564225				1211890				564226				568851			301610	564226	694117	737890	937297	568851	557001	2.03317e+06
E1A-binding protein p400 OS=Mus musculus GN=Ep400 PE=1 SV=3	IAQLASIAGPQSR		583222				1468320				583223				689217			225584	583223	477732	628845	523813	689217	868696	1.32719e+06
E1A-binding protein p400 OS=Mus musculus GN=Ep400 PE=1 SV=3	IARPFIEALK		353385								353386							206595	353386	163151	1.42111e+06
E1A-binding protein p400 OS=Mus musculus GN=Ep400 PE=1 SV=3	IDENANSEQR						318596								149547							153870	149547	26298.9	311950
E1A-binding protein p400 OS=Mus musculus GN=Ep400 PE=1 SV=3	IFCALLSTHSR						493772								231773							420933	231773	1.03587e+06	719915
E1A-binding protein p400 OS=Mus musculus GN=Ep400 PE=1 SV=3	LASPVAPGTLTTSGGSAPAQVVHTQQR		1194540				2479730				1194541				1.16396e+06			246349	1194541	2.10183e+06	305026	350316	1.16396e+06	798400	1.40502e+06
E1A-binding protein p400 OS=Mus musculus GN=Ep400 PE=1 SV=3	MANTNTSTATPQGQVR						834762								391831							574686	391831	121454	447526
E1A-binding protein p400 OS=Mus musculus GN=Ep400 PE=1 SV=3	SASLILR						855813								401712							454522	401712	184118	403772
E1A-binding protein p400 OS=Mus musculus GN=Ep400 PE=1 SV=3	SEGDLILTLSQESLQDVLGR		66974.7				283247				66975.7				132954			99320.8	66975.7	86283.1	66976.1	102854	132954	645158	218899
E1A-binding protein p400 OS=Mus musculus GN=Ep400 PE=1 SV=3	SLPTSSSSSSLVPVSGSGPGPSPAR						2688300								1.26187e+06							3.96031e+06	1.26187e+06	4.97325e+06	1.23892e+06
E1A-binding protein p400 OS=Mus musculus GN=Ep400 PE=1 SV=3	SLVTQVSQATGVQLPGK						440683								206853							231732	206853	283143	55106.4
E1A-binding protein p400 OS=Mus musculus GN=Ep400 PE=1 SV=3	TAGQTVVAQPVNVQQLLK						748684								351426							351843	351426	1.19134e+06	517293
E1A-binding protein p400 OS=Mus musculus GN=Ep400 PE=1 SV=3	TLSYVGSHR						649406								304826							172603	304826	404771	65031.2
E1A-binding protein p400 OS=Mus musculus GN=Ep400 PE=1 SV=3	TVAFPSTHPPR						1169170								548799							488377	548799	600111	439181
E1A-binding protein p400 OS=Mus musculus GN=Ep400 PE=1 SV=3	VPGSSFAAGSLQYK		620328				1414480				620329				663945			602453	620329	1.01854e+06	296547	131393	663945	1.6411e+06	538203
E3 ubiquitin-protein ligase TRIM33 OS=Mus musculus GN=Trim33 PE=1 SV=2	TAQGLSPVDQR						462787								217229							152407	217229	396296	464340
E3 ubiquitin-protein ligase TRIM33 OS=Mus musculus GN=Trim33 PE=1 SV=2	TPGQINLAQLR						483270								226843							107763	226843	293832	533018
E3 ubiquitin-protein ligase TRIP12 OS=Mus musculus GN=Trip12 PE=1 SV=1	LLDTNPEINQSDSQDSR					247167	327901	452300						682166	153914	92116.8						682166	153914	92116.8	662242
E3 ubiquitin-protein ligase TRIP12 OS=Mus musculus GN=Trip12 PE=1 SV=1	LSAQSNSNNIEPAR					266301								734974								734974	610235	319933	1.84963e+06
E3 ubiquitin-protein ligase TRIP12 OS=Mus musculus GN=Trip12 PE=1 SV=1	SGSGSESTGAEER						328307								154105							153182	154105	711045	49338.6
E3 ubiquitin-protein ligase UHRF1 OS=Mus musculus GN=Uhrf1 PE=1 SV=2	ALEQGPSSSK			1240100								298690						394938	223648	298690	111171
E3 ubiquitin-protein ligase UHRF1 OS=Mus musculus GN=Uhrf1 PE=1 SV=2	ALSEDEPCSSSAVK			625637								150691						268202	90959.3	150691	147122
E3 ubiquitin-protein ligase UHRF1 OS=Mus musculus GN=Uhrf1 PE=1 SV=2	GAEAEDWR							129813								26438.3						17724.1	24210.7	26438.3	13154.5
E3 ubiquitin-protein ligase UHRF1 OS=Mus musculus GN=Uhrf1 PE=1 SV=2	KIEEVFHVEPQLQR							2935260								597803						2.18783e+06	352566	597803	117800
E3 ubiquitin-protein ligase UHRF1 OS=Mus musculus GN=Uhrf1 PE=1 SV=2	LLNDSQLNNCR			781377				2073298				188202				422253		187705	73639.3	188202	300374	238974	214264	422253	378540
E3 ubiquitin-protein ligase UHRF1 OS=Mus musculus GN=Uhrf1 PE=1 SV=2	SGFLVWR							3188770								649433						578437	183490	649433	1.28117e+06
E3 ubiquitin-protein ligase UHRF1 OS=Mus musculus GN=Uhrf1 PE=1 SV=2	STGPTLSSPR			1183740		141327	441872	6149860				285115		390055	207411	1.2525e+06		262613	299795	285115	445371	390055	207411	1.2525e+06	312933
E3 ubiquitin-protein ligase UHRF1 OS=Mus musculus GN=Uhrf1 PE=1 SV=2	TAGQSSDQKLTNNNR			478319				1745910				115208				355577		84996.7	1.36722e+06	115208	167850	57225.9	56371.3	355577	190852
E3 ubiquitin-protein ligase UHRF1 OS=Mus musculus GN=Uhrf1 PE=1 SV=2	TDSSEVVQAGEK							541455								110274						49005.1	493698	110274	240804
Elongation factor 1-alpha 1 OS=Mus musculus GN=Eef1a1 PE=1 SV=3	AVDKKAAGAGKVTK						4135640								1.94123e+06							1.06147e+06	1.94123e+06	1.93886e+06	2.1386e+06
Elongation factor 1-alpha 1 OS=Mus musculus GN=Eef1a1 PE=1 SV=3	DGSASGTTLLEALDCILPPTRPTDKPLR						1424030								668428							997257	668428	195195	578156
Elongation factor 1-alpha 1 OS=Mus musculus GN=Eef1a1 PE=1 SV=3	EHALLAYTLGVK		25394700				46417800				2.53947e+07				2.17881e+07			7.42222e+06	2.53947e+07	4.17519e+07	1.55137e+07	4.65704e+06	2.17881e+07	2.62551e+07	1.3987e+08
Elongation factor 1-alpha 1 OS=Mus musculus GN=Eef1a1 PE=1 SV=3	EVSTYIKK						16036200								7.52725e+06							1.23262e+07	7.52725e+06	2.59333e+06	3.46416e+07
Elongation factor 1-alpha 1 OS=Mus musculus GN=Eef1a1 PE=1 SV=3	FAVRDMR		15124200								1.51242e+07							1.41041e+07	1.51242e+07	2.19572e+07	4.24844e+07
Elongation factor 1-alpha 1 OS=Mus musculus GN=Eef1a1 PE=1 SV=3	FAVRDMRQTVAVGVIK		834631				3147600				834632				1.47746e+06			295622	834632	614089	99801.3	205752	1.47746e+06	675530	1.19945e+06
Elongation factor 1-alpha 1 OS=Mus musculus GN=Eef1a1 PE=1 SV=3	FEKEAAEMGK						1011310								474701							489037	474701	243248	442359
Elongation factor 1-alpha 1 OS=Mus musculus GN=Eef1a1 PE=1 SV=3	IGGIGTVPVGR		1.2991e+08	2155811		6233980	268249308	3441455			1.2991e+08	519247		1.72053e+07	1.25914e+08	700896		5.46958e+06	1.2991e+08	519247	3.88948e+06	1.72053e+07	1.25914e+08	700896	1.13227e+07
Elongation factor 1-alpha 1 OS=Mus musculus GN=Eef1a1 PE=1 SV=3	IGGIGTVPVGRVETGVLKPGMVVTFAPVNVTTEVK		14474300				1988160				1.44743e+07				933226			1.78742e+07	1.44743e+07	1.91066e+07	8.84733e+06	470792	933226	384970	697621
Elongation factor 1-alpha 1 OS=Mus musculus GN=Eef1a1 PE=1 SV=3	KLEDGPKFLK						17362200								8.14967e+06							3.71711e+07	8.14967e+06	1.59578e+07	6.42131e+06
Elongation factor 1-alpha 1 OS=Mus musculus GN=Eef1a1 PE=1 SV=3	LPLQDVYK		13786500				41099200				1.37865e+07				1.92916e+07			6.81178e+06	1.37865e+07	9.85202e+06	3.34316e+07	3.48955e+07	1.92916e+07	1.86386e+07	1.9855e+07
Elongation factor 1-alpha 1 OS=Mus musculus GN=Eef1a1 PE=1 SV=3	LPLQDVYKIGGIGTVPVGR		749084				1515080				749085				711166			2.02631e+06	749085	185440	876177	2.36691e+06	711166	851779	2.44823e+06
Elongation factor 1-alpha 1 OS=Mus musculus GN=Eef1a1 PE=1 SV=3	MDSTEPPYSQK		2554280				13793100				2.55428e+06				6.47436e+06			1.44206e+06	2.55428e+06	4.64661e+06	1.04063e+06	1.79374e+07	6.47436e+06	1.85427e+07	2.08956e+06
Elongation factor 1-alpha 1 OS=Mus musculus GN=Eef1a1 PE=1 SV=3	MDSTEPPYSQKR		426760								426761							1.04538e+06	426761	593671	718890
Elongation factor 1-alpha 1 OS=Mus musculus GN=Eef1a1 PE=1 SV=3	NGQTREHALLAYTLGVK		1706630								1.70663e+06							1.0934e+06	1.70663e+06	4.98811e+06	2.09718e+06
Elongation factor 1-alpha 1 OS=Mus musculus GN=Eef1a1 PE=1 SV=3	QLIVGVNKMDSTEPPYSQKR						599424								281365							1.21878e+06	281365	255348	513795
Elongation factor 1-alpha 1 OS=Mus musculus GN=Eef1a1 PE=1 SV=3	QTVAVGVIK		37642119			2122560	113335950	2628728			3.76421e+07			5.85811e+06	5.31989e+07	535374		3.48053e+07	3.76421e+07	7.1629e+07	3.1306e+07	5.85811e+06	5.31989e+07	535374	6.7034e+06
Elongation factor 1-alpha 1 OS=Mus musculus GN=Eef1a1 PE=1 SV=3	QTVAVGVIKAVDKK		569032				2413190				569033				1.13273e+06			371645	569033	495246	375462	2.24591e+06	1.13273e+06	302622	1.24419e+06
Elongation factor 1-alpha 1 OS=Mus musculus GN=Eef1a1 PE=1 SV=3	RYEEIVK						43782900								2.05513e+07							7.39948e+06	2.05513e+07	9.81626e+06	2.49521e+07
Elongation factor 1-alpha 1 OS=Mus musculus GN=Eef1a1 PE=1 SV=3	RYEEIVKEVSTYIK		7388510								7.38851e+06							7.96757e+06	7.38851e+06	5.00834e+06	4.03583e+07
Elongation factor 1-alpha 1 OS=Mus musculus GN=Eef1a1 PE=1 SV=3	RYEEIVKEVSTYIKK						6137670								2.88097e+06							1.42456e+06	2.88097e+06	2.02473e+07	2.86083e+06
Elongation factor 1-alpha 1 OS=Mus musculus GN=Eef1a1 PE=1 SV=3	SGDAAIVDMVPGKPMCVESFSDYPPLGR		232546				5363420				232547				2.51754e+06			233995	232547	98527.2	443290	2.13768e+06	2.51754e+06	3.8562e+06	8.40139e+06
Elongation factor 1-alpha 1 OS=Mus musculus GN=Eef1a1 PE=1 SV=3	SGKKLEDGPK						1156290								542753							774027	542753	448799	1.85099e+06
Elongation factor 1-alpha 1 OS=Mus musculus GN=Eef1a1 PE=1 SV=3	STTTGHLIYK		20666100				63216646				2.06661e+07				2.96733e+07			2.0867e+07	2.06661e+07	1.38863e+07	9.5619e+07	3.95012e+07	2.96733e+07	1.78702e+08	5.03771e+06
Elongation factor 1-alpha 1 OS=Mus musculus GN=Eef1a1 PE=1 SV=3	THINIVVIGHVDSGK		7576620				6316570				7.57662e+06				2.96494e+06			4.58119e+06	7.57662e+06	2.82067e+06	7.35615e+06	1.73573e+06	2.96494e+06	1.47824e+06	1.63992e+06
Elongation factor 1-alpha 1 OS=Mus musculus GN=Eef1a1 PE=1 SV=3	TIEKFEKEAAEMGK		2938800				24112500				2.9388e+06				1.13182e+07			2.46264e+06	2.9388e+06	606683	6.32272e+06	1.91502e+07	1.13182e+07	2.0839e+07	6.65661e+06
Elongation factor 1-alpha 1 OS=Mus musculus GN=Eef1a1 PE=1 SV=3	VETGVLKPGMVVTFAPVNVTTEVK		14386600				14004900				14386601				6.57378e+06			2.19658e+07	14386601	1.31316e+07	7.74056e+06	6.61114e+06	6.57378e+06	2.81391e+06	2.82827e+06
Elongation factor 1-alpha 1 OS=Mus musculus GN=Eef1a1 PE=1 SV=3	YEEIVK						15663800								7.35245e+06							1.40665e+07	7.35245e+06	5.57795e+06	2.93637e+06
Elongation factor 1-alpha 1 OS=Mus musculus GN=Eef1a1 PE=1 SV=3	YEEIVKEVSTYIK		1839440				2393390				1839441				1.12344e+06			1.63469e+06	1839441	2.48747e+06	1.19875e+06	1.46409e+06	1.12344e+06	1.93455e+06	1.61879e+06
Elongation factor 1-alpha 1 OS=Mus musculus GN=Eef1a1 PE=1 SV=3	YEEIVKEVSTYIKK		1311970				3681220				1.31197e+06				1.72793e+06			1.0966e+06	1.31197e+06	746778	816036	366941	1.72793e+06	1.2366e+06	1.74628e+06
Elongation factor 1-alpha 1 OS=Mus musculus GN=Eef1a1 PE=1 SV=3	YYVTIIDAPGHR		4101400				7365870				4.1014e+06				3.45748e+06			4.39859e+06	4.1014e+06	2.85475e+06	8.10202e+06	2.70694e+06	3.45748e+06	2.41798e+07	3.14577e+06
Elongation factor 2 OS=Mus musculus GN=Eef2 PE=1 SV=2	EGALCEENMR		66152.6								66153.6							62308.4	66153.6	71713.2	19048
Elongation factor 2 OS=Mus musculus GN=Eef2 PE=1 SV=2	GEGQLSAAER		683870				654709				683871				307315			142401	683871	149840	344590	2.11118e+06	307315	231593	888349
Elongation factor 2 OS=Mus musculus GN=Eef2 PE=1 SV=2	VFSGVVSTGLK		709612				870137				709613				408435			1.66615e+06	709613	343183	700579	469133	408435	558921	1.69742e+06
Elongation factor Tu, mitochondrial OS=Mus musculus GN=Tufm PE=1 SV=1	DPELGVK		447506								447507							131389	447507	387711	739355
Elongation factor Tu, mitochondrial OS=Mus musculus GN=Tufm PE=1 SV=1	GTVVTGTLER						1540490								723093							225512	723093	1.02534e+06	7.76244e+06
Ena/VASP-like protein OS=Mus musculus GN=Evl PE=1 SV=2	SNSVEKPVSSLLSR						448174								210369							124412	210369	1.03929e+06	490405
Ena/VASP-like protein OS=Mus musculus GN=Evl PE=1 SV=2	SPLQSQPHSR						3923550								1.84168e+06							1.31681e+07	1.84168e+06	715446	334622
Ena/VASP-like protein OS=Mus musculus GN=Evl PE=1 SV=2	TPSVAKSPEAK						400873								188167							120602	188167	91666.4	243307
Endoplasmin OS=Mus musculus GN=Hsp90b1 PE=1 SV=2	FAFQAEVNR							1109460								225956						291035	123433	225956	131924
Endoplasmin OS=Mus musculus GN=Hsp90b1 PE=1 SV=2	GVVDSDDLPLNVSR							1579760								321738						159546	819554	321738	714068
Endothelial differentiation-related factor 1 OS=Mus musculus GN=Edf1 PE=1 SV=1	AESDWDTVTVLR		10825200				5049320				1.08252e+07				2.37011e+06			1.05176e+07	1.08252e+07	6.20922e+06	1.15371e+07	1.5048e+06	2.37011e+06	5.44206e+06	3.73087e+06
Endothelial differentiation-related factor 1 OS=Mus musculus GN=Edf1 PE=1 SV=1	AESDWDTVTVLRK		2273650				1950290				2.27365e+06				915450			4.48947e+06	2.27365e+06	3.04759e+06	2.52348e+06	774959	915450	1.69028e+06	933840
Endothelial differentiation-related factor 1 OS=Mus musculus GN=Edf1 PE=1 SV=1	AIGLKLR						740317								347499							377824	347499	55282.7	308039
Endothelial differentiation-related factor 1 OS=Mus musculus GN=Edf1 PE=1 SV=1	AIPNNQVLGK		162950								162951							220746	162951	107951	118863
Endothelial differentiation-related factor 1 OS=Mus musculus GN=Edf1 PE=1 SV=1	INEKPQVIADYESGR		1408620				1302290				1408621				611284			798974	1408621	7.04286e+06	2.75519e+06	1.61389e+06	611284	374106	638088
Endothelial differentiation-related factor 1 OS=Mus musculus GN=Edf1 PE=1 SV=1	QAILAAQR		14899500				19736900				1.48995e+07				9.26433e+06			8.29862e+06	1.48995e+07	1.93779e+07	1.37969e+07	6.73217e+06	9.26433e+06	1.0697e+07	3.29196e+07
Endothelial differentiation-related factor 1 OS=Mus musculus GN=Edf1 PE=1 SV=1	SKQAILAAQR		4722620								4.72262e+06							2.07229e+06	4.72262e+06	1.71024e+06	9.91971e+06
Enhancer of polycomb homolog 1 OS=Mus musculus GN=Epc1 PE=2 SV=1	DGSSTNDPYVAFR		239848								239849							251186	239849	208925	49324
Enhancer of polycomb homolog 2 OS=Mus musculus GN=Epc2 PE=2 SV=2	AISAQQVFR						272560								127938							652415	127938	210820	26595.9
Eosinophil cationic protein 2 OS=Mus musculus GN=Ear2 PE=2 SV=1	ITVCNITSR		279515				515332				279516				241893			353568	279516	177687	360552	86861.8	241893	365861	65205.1
Eosinophil cationic protein 2 OS=Mus musculus GN=Ear2 PE=2 SV=1	SLEYYTVACNPR		692288				508882				692289				238865			81796	692289	220731	1.52666e+06	113155	238865	450813	191426
Eosinophil cationic protein 2 OS=Mus musculus GN=Ear2 PE=2 SV=1	TPQDSPMYPVVPVHLDGTF		1139910								1139911							1.34585e+06	1139911	969688	926220
Eukaryotic initiation factor 4A-III OS=Mus musculus GN=Eif4a3 PE=2 SV=3	AANATMATSGSAR	139797	1641610			328505	3833410			726241	1.64161e+06			906653	1.79937e+06			726241	1.64161e+06	2.42223e+06	1.98542e+06	906653	1.79937e+06	2.01709e+06	538703
Eukaryotic initiation factor 4A-III OS=Mus musculus GN=Eif4a3 PE=2 SV=3	DVIAQSQSGTGK					324055	502630							894371	235931							894371	235931	511612	1.25414e+06
Eukaryotic initiation factor 4A-III OS=Mus musculus GN=Eif4a3 PE=2 SV=3	ETQALILAPTR					92289.9	256963							254716	120617							254716	120617	262944	397857
Eukaryotic initiation factor 4A-III OS=Mus musculus GN=Eif4a3 PE=2 SV=3	GIYAYGFEKPSAIQQR		1794870				1905030				1794871				894205			4.33147e+06	1794871	4.52341e+06	4.22193e+06	1.13815e+06	894205	1.02063e+06	1.40908e+06
Eukaryotic initiation factor 4A-III OS=Mus musculus GN=Eif4a3 PE=2 SV=3	VLISTDVWAR		1481740			351900					1.48174e+06			971221				2.17599e+06	1.48174e+06	1.01617e+06	1.39194e+06	971221	2.26881e+06	2.42358e+06	616758
Eukaryotic translation initiation factor 4 gamma 2 OS=Mus musculus GN=Eif4g2 PE=1 SV=2	FLLQDTVELR						400956								188206							77818.4	188206	951498	336766
Eukaryotic translation initiation factor 4 gamma 2 OS=Mus musculus GN=Eif4g2 PE=1 SV=2	FSASSGGGGSR						401556								188487							26044.1	188487	83952.9	204985
Eukaryotic translation initiation factor 4 gamma 2 OS=Mus musculus GN=Eif4g2 PE=1 SV=2	LAEDAPNFDGPAAEGQPGQK						631612								296474							80520.2	296474	1.26826e+06	699451
Eukaryotic translation initiation factor 4 gamma 2 OS=Mus musculus GN=Eif4g2 PE=1 SV=2	MESAIAEGGASR						607081								284959							1.08618e+06	284959	81499.5	1.68957e+06
Eukaryotic translation initiation factor 4 gamma 2 OS=Mus musculus GN=Eif4g2 PE=1 SV=2	SYLAQFAAR						917456								430646							39284.3	430646	246278	237994
Eukaryotic translation initiation factor 4 gamma 2 OS=Mus musculus GN=Eif4g2 PE=1 SV=2	TQTPPLGQTPQLGLK						1023330								480343							67998.8	480343	340645	1.61525e+06
Ezrin OS=Mus musculus GN=Ezr PE=1 SV=3	APDFVFYAPR		1392540								1392541							4.40574e+06	1392541	340879	3.10188e+06
Ezrin OS=Mus musculus GN=Ezr PE=1 SV=3	VSAQEVR					192065								530088								530088	806708	838678	1.18195e+06
F-actin-capping protein subunit alpha-2 OS=Mus musculus GN=Capza2 PE=1 SV=3	ADLEEQLSDEEKVR			29816045			688905	55490690				7.18147e+06			323366	1.13014e+07		2.45029e+06	8.59549e+06	7.18147e+06	8.56175e+06	1.16318e+06	323366	1.13014e+07	3.33459e+06
F-actin-capping protein subunit alpha-2 OS=Mus musculus GN=Capza2 PE=1 SV=3	ADLEEQLSDEEKVRIAAK			30958980			251251	98692020				7.45676e+06			117936	2.00999e+07		5.77894e+06	1.0443e+07	7.45676e+06	5.53757e+06	837989	117936	2.00999e+07	412788
F-actin-capping protein subunit alpha-2 OS=Mus musculus GN=Capza2 PE=1 SV=3	DIQDSLTVSNEVQTAK		299121	8813424			538967	17608288			299122	2.1228e+06			252987	3.58615e+06		1.41104e+06	299122	2.1228e+06	2.17988e+06	424978	252987	3.58615e+06	855989
F-actin-capping protein subunit alpha-2 OS=Mus musculus GN=Capza2 PE=1 SV=3	DIQDSLTVSNEVQTAKEFIK			760503								183174						210932	223560	183174	94700
F-actin-capping protein subunit alpha-2 OS=Mus musculus GN=Capza2 PE=1 SV=3	EATDPRPYEAENAIESWR							28697400								5.84459e+06						1.39245e+07	1.58317e+06	5.84459e+06	1.0922e+07
F-actin-capping protein subunit alpha-2 OS=Mus musculus GN=Capza2 PE=1 SV=3	EGAAHAFAQYNLDQFTPVK			1577150				8405940				379872				1.71198e+06		223108	333975	379872	124939	3.51752e+06	1.71315e+06	1.71198e+06	2.06389e+06
F-actin-capping protein subunit alpha-2 OS=Mus musculus GN=Capza2 PE=1 SV=3	FIIHAPPGEFNEVFNDVR			1697790				4018480				408929				818414		382848	488416	408929	1.39145e+06	308289	1.05556e+06	818414	1.96459e+06
F-actin-capping protein subunit alpha-2 OS=Mus musculus GN=Capza2 PE=1 SV=3	FIIHAPPGEFNEVFNDVRLLLNNDNLLR			532641								128292						201503	93691.9	128292	64843.1
F-actin-capping protein subunit alpha-2 OS=Mus musculus GN=Capza2 PE=1 SV=3	FTVTPSTTQVVGILK			5193392				6106180				1.25088e+06				1.2436e+06		1.50169e+06	5.77603e+06	1.25088e+06	965992	944385	870575	1.2436e+06	1.12533e+06
F-actin-capping protein subunit alpha-2 OS=Mus musculus GN=Capza2 PE=1 SV=3	ILSYK			9899820								2.38446e+06						5.46483e+06	1.7116e+06	2.38446e+06	602597
F-actin-capping protein subunit alpha-2 OS=Mus musculus GN=Capza2 PE=1 SV=3	IQVHYYEDGNVQLVSHK							2765290								563186						100171	82949.8	563186	677768
F-actin-capping protein subunit alpha-2 OS=Mus musculus GN=Capza2 PE=1 SV=3	IVEAAENEYQTAISENYQTMSDTTFK							3540980								721165						1.15236e+06	572934	721165	789788
F-actin-capping protein subunit alpha-2 OS=Mus musculus GN=Capza2 PE=1 SV=3	KVDGQQTIIACIESHQFQAK			518253								124826						197511	162131	124826	248573
F-actin-capping protein subunit alpha-2 OS=Mus musculus GN=Capza2 PE=1 SV=3	LLLNNDNLLR		2757730	67473550			8426740	119011320			2757731	1.62516e+07			3.95544e+06	2.42382e+07		5.18259e+06	2757731	1.62516e+07	4.78552e+07	4.73196e+06	3.95544e+06	2.42382e+07	7.37858e+06
F-actin-capping protein subunit alpha-2 OS=Mus musculus GN=Capza2 PE=1 SV=3	QLPVTR			42221200				81667590				1.01694e+07				1.66326e+07		1.96797e+07	1.30128e+07	1.01694e+07	1.09206e+07	3.27762e+06	8.1509e+07	1.66326e+07	3.79554e+07
F-actin-capping protein subunit alpha-2 OS=Mus musculus GN=Capza2 PE=1 SV=3	RQLPVTR							8264360								1.68314e+06						1.12664e+06	1.63566e+06	1.68314e+06	846737
F-actin-capping protein subunit alpha-2 OS=Mus musculus GN=Capza2 PE=1 SV=3	TSVETALR		3618100	20942779			2363870	25682294			3.6181e+06	5.04426e+06			1.10958e+06	5.23052e+06		2.61214e+06	3.6181e+06	5.04426e+06	4.84191e+06	1.60909e+06	1.10958e+06	5.23052e+06	1.2428e+06
F-actin-capping protein subunit beta OS=Mus musculus GN=Capzb PE=1 SV=3	DETVSDCSPHIANIGR							745255								151781						207165	265049	151781	164729
F-actin-capping protein subunit beta OS=Mus musculus GN=Capzb PE=1 SV=3	DGDSYRSPWSNKYDPPLEDGAMPSAR			450308								108461						386775	222316	108461	312103
F-actin-capping protein subunit beta OS=Mus musculus GN=Capzb PE=1 SV=3	DKVVGKDYLLCDYNR			8902657				17148600				2.14429e+06				3.49253e+06		1.51115e+06	695368	2.14429e+06	1.64491e+06	5.80517e+06	5.57794e+06	3.49253e+06	1.35766e+07
F-actin-capping protein subunit beta OS=Mus musculus GN=Capzb PE=1 SV=3	DKVVGKDYLLCDYNRDGDSYR							1651470								336343						147790	1.8572e+06	336343	191879
F-actin-capping protein subunit beta OS=Mus musculus GN=Capzb PE=1 SV=3	DYLLCDYNR		297054								297055							157217	297055	312611	284087
F-actin-capping protein subunit beta OS=Mus musculus GN=Capzb PE=1 SV=3	DYLLCDYNRDGDSYR							1706580								347567						598818	2.39506e+06	347567	95165.7
F-actin-capping protein subunit beta OS=Mus musculus GN=Capzb PE=1 SV=3	GCWDSIHVVEVQEK			1643320				2185730				395809				445152		319288	282889	395809	300803	453358	289653	445152	623464
F-actin-capping protein subunit beta OS=Mus musculus GN=Capzb PE=1 SV=3	GCWDSIHVVEVQEKSSGR							2365100								481683						265232	982081	481683	131709
F-actin-capping protein subunit beta OS=Mus musculus GN=Capzb PE=1 SV=3	KLEVEANNAFDQYR			30824032				65017393				7.42426e+06				1.32416e+07		1.18217e+08	3.01497e+06	7.42426e+06	4.967e+06	1.47349e+08	2.13703e+07	1.32416e+07	1.18709e+07
F-actin-capping protein subunit beta OS=Mus musculus GN=Capzb PE=1 SV=3	KLEVEANNAFDQYRDLYFEGGVSSVYLWDLDHGFAGVILIK			525097								126475						69379.4	71461.9	126475	280318
F-actin-capping protein subunit beta OS=Mus musculus GN=Capzb PE=1 SV=3	LEVEANNAFDQYR			4715794				9040911				1.13584e+06				1.8413e+06		3.15285e+06	2.06017e+06	1.13584e+06	5.87004e+06	9.48535e+06	2.46087e+06	1.8413e+06	394064
F-actin-capping protein subunit beta OS=Mus musculus GN=Capzb PE=1 SV=3	LRKLEVEANNAFDQYR							1091750								222349						129011	53227.4	222349	350740
F-actin-capping protein subunit beta OS=Mus musculus GN=Capzb PE=1 SV=3	LTSTVMLWLQTNK			591399								142444						650901	642843	142444	242277
F-actin-capping protein subunit beta OS=Mus musculus GN=Capzb PE=1 SV=3	LVEDMENK						1228350								576577							35758.2	576577	128072	882319
F-actin-capping protein subunit beta OS=Mus musculus GN=Capzb PE=1 SV=3	LVEDMENKIR		695535	4518290			1654370	3521180			695536	1.08827e+06			776547	717133		1.59649e+06	695536	1.08827e+06	1.39097e+06	1.05982e+06	776547	717133	965672
F-actin-capping protein subunit beta OS=Mus musculus GN=Capzb PE=1 SV=3	NDLVEALK							1878380								382556						467405	2.20989e+06	382556	122017
F-actin-capping protein subunit beta OS=Mus musculus GN=Capzb PE=1 SV=3	NDLVEALKR			3270770				7314360				787796				1.48966e+06		608352	2.21082e+06	787796	1.35704e+06	1.57253e+06	1.69448e+06	1.48966e+06	1.21062e+06
F-actin-capping protein subunit beta OS=Mus musculus GN=Capzb PE=1 SV=3	QEALKNDLVEALK							2324480								473410						1.09736e+06	2.53537e+06	473410	261525
F-actin-capping protein subunit beta OS=Mus musculus GN=Capzb PE=1 SV=3	QEALKNDLVEALKR							14759300								3.00592e+06						1.72343e+06	5.22938e+06	3.00592e+06	1.79139e+07
F-actin-capping protein subunit beta OS=Mus musculus GN=Capzb PE=1 SV=3	QMEKDETVSDCSPHIANIGR			7674390			528255	2634260				1.84845e+06			247959	536500		1.93791e+06	2.61482e+06	1.84845e+06	1.65763e+06	590299	247959	536500	435777
F-actin-capping protein subunit beta OS=Mus musculus GN=Capzb PE=1 SV=3	RLPPQQIEK			16649814			1159140	84502200				4.01026e+06			544091	1.72099e+07		7.29111e+06	2.13923e+06	4.01026e+06	1.34907e+06	1.36669e+07	544091	1.72099e+07	3.55498e+06
F-actin-capping protein subunit beta OS=Mus musculus GN=Capzb PE=1 SV=3	RLPPQQIEKNLSDLIDLVPSLCEDLLSSVDQPLKIAR			3113770								749981						283820	4.46957e+06	749981	1.92634e+06
F-actin-capping protein subunit beta OS=Mus musculus GN=Capzb PE=1 SV=3	SDQQLDCALDLMR		3072460	15994021			3940230	11151641			3.07246e+06	3.85231e+06			1.84951e+06	2.27117e+06		349138	3.07246e+06	3.85231e+06	2.13498e+06	1.20438e+06	1.84951e+06	2.27117e+06	2.12736e+06
F-actin-capping protein subunit beta OS=Mus musculus GN=Capzb PE=1 SV=3	SGSGTMNLGGSLTR		8874330	13037553			2339500	9053501			8.87433e+06	3.14022e+06			1.09814e+06	1.84386e+06		5.9482e+06	8.87433e+06	3.14022e+06	9.27117e+06	289700	1.09814e+06	1.84386e+06	1.53356e+06
F-actin-capping protein subunit beta OS=Mus musculus GN=Capzb PE=1 SV=3	SKQEALKNDLVEALK			263932				1883430				63570.7				383584		23905	96195.4	63570.7	251880	375653	425461	383584	371515
F-actin-capping protein subunit beta OS=Mus musculus GN=Capzb PE=1 SV=3	SKQEALKNDLVEALKR			939850				4022850				226372				819304		558144	87039.7	226372	529594	1.5967e+06	467440	819304	1.31917e+06
F-actin-capping protein subunit beta OS=Mus musculus GN=Capzb PE=1 SV=3	SPWSNKYDPPLEDGAMPSAR			4677570				5547640				1.12664e+06				1.12985e+06		364130	1.88131e+06	1.12664e+06	1.74059e+06	2.65045e+06	876887	1.12985e+06	1.6808e+06
F-actin-capping protein subunit beta OS=Mus musculus GN=Capzb PE=1 SV=3	STLNEIYFGK			36553447		182107	2625420	46242773				8.80424e+06		502605	1.23235e+06	9.41792e+06		1.39472e+07	1.21259e+07	8.80424e+06	9.06026e+06	502605	1.23235e+06	9.41792e+06	7.91077e+06
F-actin-capping protein subunit beta OS=Mus musculus GN=Capzb PE=1 SV=3	STLNEIYFGKTK			31233758				39971028				7.52294e+06				8.1406e+06		2.1346e+07	6.42491e+06	7.52294e+06	3.07879e+07	6.16863e+06	1.83017e+07	8.1406e+06	5.41578e+06
F-actin-capping protein subunit beta OS=Mus musculus GN=Capzb PE=1 SV=3	STLNEIYFGKTKDIVNGLR			1762080				3254886				424414				662899		2.1706e+06	1.60276e+06	424414	463392	983597	505432	662899	1.32935e+06
F-actin-capping protein subunit beta OS=Mus musculus GN=Capzb PE=1 SV=3	SVQTFADK			7538680				9167280				1.81576e+06				1.86703e+06		1.56138e+06	1.17216e+06	1.81576e+06	543660	2.24431e+06	6.33965e+06	1.86703e+06	1.30313e+06
F-actin-capping protein subunit beta OS=Mus musculus GN=Capzb PE=1 SV=3	SVQTFADKSK			3523320								848625						1.39082e+06	665370	848625	2.08191e+06
F-actin-capping protein subunit beta OS=Mus musculus GN=Capzb PE=1 SV=3	SVQTFADKSKQEALK			2355810								567419						1.86626e+06	292121	567419	303990
F-actin-capping protein subunit beta OS=Mus musculus GN=Capzb PE=1 SV=3	SVQTFADKSKQEALKNDLVEALK							7351240								1.49717e+06						962220	1.22717e+06	1.49717e+06	555865
F-actin-capping protein subunit beta OS=Mus musculus GN=Capzb PE=1 SV=3	TKDIVNGLR			1136250								273677						72197.7	154336	273677	719288
F-actin-capping protein subunit beta OS=Mus musculus GN=Capzb PE=1 SV=3	VVGKDYLLCDYNR			1208090				2014910				290980				410362		27998.3	450075	290980	196782	1.02482e+06	267889	410362	1.48026e+06
F-box only protein 50 OS=Mus musculus GN=Nccrp1 PE=2 SV=2	TVIAQHHVAPR		127745								127746							98344.7	127746	117484	975253
F-box only protein 50 OS=Mus musculus GN=Nccrp1 PE=2 SV=2	VTDSSVSVQLRE	299332	226899			191161				1.55502e+06	226900			527593				1.55502e+06	226900	377726	493791	527593	221917	382450	999554
FACT complex subunit SPT16 OS=Mus musculus GN=Supt16h PE=1 SV=2	AALLTER						1552850	2534970							728895	516279						1.37416e+06	728895	516279	643988
FACT complex subunit SPT16 OS=Mus musculus GN=Supt16h PE=1 SV=2	AVTLDKDAYYR		1705070	10369010		170486	1007570	12081320			1.70507e+06	2.49747e+06		470532	472945	2.46051e+06		8.03553e+06	1.70507e+06	2.49747e+06	700429	470532	472945	2.46051e+06	749092
FACT complex subunit SPT16 OS=Mus musculus GN=Supt16h PE=1 SV=2	DLGFNGAPYR			576073				278875				138753				56796.6		91500	147261	138753	253032	41438.9	286298	56796.6	19776.4
FACT complex subunit SPT16 OS=Mus musculus GN=Supt16h PE=1 SV=2	GNENANGAPAITLLVR							65290.8								13297.5						14547.7	11000.8	13297.5	17326.5
FACT complex subunit SPT16 OS=Mus musculus GN=Supt16h PE=1 SV=2	IIKEVQKR		2409420								2.40942e+06							5.91855e+06	2.40942e+06	206941	1.0949e+06
FACT complex subunit SPT16 OS=Mus musculus GN=Supt16h PE=1 SV=2	INFYCPGSALGR							572688								116635						16825.9	142576	116635	183537
FACT complex subunit SPT16 OS=Mus musculus GN=Supt16h PE=1 SV=2	LAESVEKAIEEK			977889				707248				235534				144040		84419.2	387505	235534	315790	234535	14514.5	144040	249306
FACT complex subunit SPT16 OS=Mus musculus GN=Supt16h PE=1 SV=2	LKDLYIRPNIAQKR			1733870								417619						1.97813e+06	557503	417619	550918
FACT complex subunit SPT16 OS=Mus musculus GN=Supt16h PE=1 SV=2	NEGNIFPNPEATFVK			2061660				22895.9				496570				4663.24		947033	224851	496570	1.80207e+06	5691	2434.18	4663.24	9644.88
FACT complex subunit SPT16 OS=Mus musculus GN=Supt16h PE=1 SV=2	QDSLVINLNR			1056380								254439						563222	79901.7	254439	729059
FACT complex subunit SPT16 OS=Mus musculus GN=Supt16h PE=1 SV=2	YTEGVQSLNWTK			3943290				4625530				949778				942048		750451	1.26361e+06	949778	1.23622e+06	416784	1.05574e+06	942048	2.5148e+06
FACT complex subunit SSRP1 (Fragment) OS=Mus musculus GN=Ssrp1 PE=2 SV=1	AETLEFNDIFQEVK			102455			261235					24677.5			122622			28224.1	17753.4	24677.5	15521	311180	122622	337305	463274
FACT complex subunit SSRP1 (Fragment) OS=Mus musculus GN=Ssrp1 PE=2 SV=1	ASSGLLYPLER		562847	725449							562848	174731						565089	562848	174731	398670
FACT complex subunit SSRP1 (Fragment) OS=Mus musculus GN=Ssrp1 PE=2 SV=1	ELQCLTPR							118506								24135.4						139063	43377.5	24135.4	38555.6
FYN-binding protein OS=Mus musculus GN=Fyb PE=1 SV=2	DLQIKPGESLEVIQSTDDTK						818213								384063							357060	384063	390350	250576
FYN-binding protein OS=Mus musculus GN=Fyb PE=1 SV=2	NSLNAVPPR						266424								125058							124397	125058	183776	112819
FYN-binding protein OS=Mus musculus GN=Fyb PE=1 SV=2	TTAVEIDYDSLKR						312656								146758							204042	146758	187034	1.10836e+06
FYN-binding protein OS=Mus musculus GN=Fyb PE=1 SV=2	VAGQSSPSGIQSR		363676				1.27862e+06				363677				600172			185424	363677	475025	1.17729e+06	1.39006e+06	600172	202952	1.34394e+06
FYN-binding protein OS=Mus musculus GN=Fyb PE=1 SV=2	YGYVLR						341121								160120							408574	160120	194631	154053
Filamin-A OS=Mus musculus GN=Flna PE=1 SV=5	AEFTVETR			3454290			1057870	5622560				831998			496555	1.14511e+06		481257	748427	831998	185901	652104	496555	1.14511e+06	408973
Filamin-A OS=Mus musculus GN=Flna PE=1 SV=5	AEGPGLNR						874244								410363							739055	410363	421831	547045
Filamin-A OS=Mus musculus GN=Flna PE=1 SV=5	AFGPGLQGGNAGSPAR		1378730	17596000			2133410	28822400			1.37873e+06	4.23816e+06			1.0014e+06	5.87005e+06		2.13027e+06	1.37873e+06	4.23816e+06	1.60379e+06	435295	1.0014e+06	5.87005e+06	1.22444e+07
Filamin-A OS=Mus musculus GN=Flna PE=1 SV=5	AGGPGLER		3120120				3195420				3.12012e+06				1.4999e+06			4.93196e+06	3.12012e+06	4.23528e+06	6.94372e+06	1.26951e+07	1.4999e+06	1.53785e+06	1.02621e+06
Filamin-A OS=Mus musculus GN=Flna PE=1 SV=5	AGGPGLERAEVGVPAEFGIWTR			24583900			2175520	46969500				5.92126e+06			1.02117e+06	9.56593e+06		3.35768e+06	8.92249e+06	5.92126e+06	1.36285e+07	2.81498e+06	1.02117e+06	9.56593e+06	586619
Filamin-A OS=Mus musculus GN=Flna PE=1 SV=5	AGNNMLLVGVHGPR						348957								163798							91654.9	163798	230590	1.67095e+06
Filamin-A OS=Mus musculus GN=Flna PE=1 SV=5	AGVAPLQVK		235054	7654500			1047730	18058256			235055	1.84366e+06			491796	3.67779e+06		175649	235055	1.84366e+06	1.37488e+06	4.63837e+06	491796	3.67779e+06	4.59787e+06
Filamin-A OS=Mus musculus GN=Flna PE=1 SV=5	AHEPTYFTVDCTEAGQGDVSIGIK			2055270				6883760				495031				1.40196e+06		2.2843e+06	421545	495031	200298	2.62111e+06	1.70069e+06	1.40196e+06	1.25461e+06
Filamin-A OS=Mus musculus GN=Flna PE=1 SV=5	AHVAPCFDASKVK			1870210				2107870				450458				429294		730196	1.05704e+06	450458	192274	60856.5	1.43542e+06	429294	735454
Filamin-A OS=Mus musculus GN=Flna PE=1 SV=5	ALGALVDSCAPGLCPDWDSWDASKPVNNAR			15117100				54348000				3.64109e+06				1.10687e+07		1.72586e+06	7.88886e+06	3.64109e+06	631397	9.04605e+06	3.80812e+06	1.10687e+07	2.00633e+07
Filamin-A OS=Mus musculus GN=Flna PE=1 SV=5	ALTQTGGPHVK						1712790								803969							3.09203e+06	803969	222053	1.34225e+06
Filamin-A OS=Mus musculus GN=Flna PE=1 SV=5	ANLPQSFQVDTSK			11266030			524973	2.73816e+07				2.71353e+06			246418	5.57661e+06		1.35032e+06	415739	2.71353e+06	3.06286e+06	2.74044e+06	246418	5.57661e+06	5.68347e+06
Filamin-A OS=Mus musculus GN=Flna PE=1 SV=5	ANLPQSFQVDTSKAGVAPLQVK			14572200								3.50985e+06						4.73023e+06	5.16524e+06	3.50985e+06	3.22033e+06
Filamin-A OS=Mus musculus GN=Flna PE=1 SV=5	ANLPQSFQVDTSKAGVAPLQVKVQGPK			14972600				4027550				3.60629e+06				820262		990538	4.32921e+06	3.60629e+06	1.07839e+06	597369	1.39913e+06	820262	1.482e+06
Filamin-A OS=Mus musculus GN=Flna PE=1 SV=5	ARGPGLEKTGVAVNKPAEFTVDAK			14571300				34501600				3.50963e+06				7.02669e+06		1.53474e+06	9.79792e+06	3.50963e+06	2.35851e+06	8.66346e+06	1.72436e+07	7.02669e+06	1.82738e+06
Filamin-A OS=Mus musculus GN=Flna PE=1 SV=5	ASGPGLNTTGVPASLPVEFTIDAK							3834787								781003						1.02757e+06	1.09055e+06	781003	566130
Filamin-A OS=Mus musculus GN=Flna PE=1 SV=5	ASGPGLNTTGVPASLPVEFTIDAKDAGEGLLAVQITDPEGKPK							6663450								1.3571e+06						1.71721e+06	386378	1.3571e+06	1.0597e+06
Filamin-A OS=Mus musculus GN=Flna PE=1 SV=5	AWGPGLEGGIVGK			19240598				41785368				4.63428e+06				8.51012e+06		1.51999e+06	2.77895e+06	4.63428e+06	3.1352e+06	6.63744e+06	6.36414e+06	8.51012e+06	1.12482e+07
Filamin-A OS=Mus musculus GN=Flna PE=1 SV=5	AYGPGIEPTGNMVK			2049900				1979180				493738				403085		997456	95509	493738	2.59833e+06	479623	936635	403085	498036
Filamin-A OS=Mus musculus GN=Flna PE=1 SV=5	CGQSAAVASPGGSIDSR			914008				1710500				220148				348365		110693	605440	220148	458581	1.81242e+06	281036	348365	216209
Filamin-A OS=Mus musculus GN=Flna PE=1 SV=5	CSGPGLER		832713				736786				832714				345841			248691	832714	252392	1.32645e+06	254231	345841	97311.7	282599
Filamin-A OS=Mus musculus GN=Flna PE=1 SV=5	DAGEGGLSLAIEGPSK							1165390								237347						374005	619426	237347	1.27858e+06
Filamin-A OS=Mus musculus GN=Flna PE=1 SV=5	DAGEGLLAVQITDPEGKPK							1418520								288900						539658	176290	288900	684234
Filamin-A OS=Mus musculus GN=Flna PE=1 SV=5	DAGYGGLSLSIEGPSK							442487								90118.3						418196	261674	90118.3	344312
Filamin-A OS=Mus musculus GN=Flna PE=1 SV=5	DKGEYTLVVK			4316600				9249930				1.03969e+06				1.88387e+06		427001	442899	1.03969e+06	3.97088e+06	2.86501e+06	2.80091e+06	1.88387e+06	2.13753e+06
Filamin-A OS=Mus musculus GN=Flna PE=1 SV=5	DVDIIDHHDNTYTVK							16188800								3.29705e+06						2.36863e+06	1.05733e+06	3.29705e+06	4.12822e+06
Filamin-A OS=Mus musculus GN=Flna PE=1 SV=5	EAPQDFHPDRVK			5064030								1.21972e+06						1.76043e+06	1.5246e+06	1.21972e+06	5.0736e+06
Filamin-A OS=Mus musculus GN=Flna PE=1 SV=5	EATTEFSVDAR		2616890	9073970			3998020	14461400			2.61689e+06	2.18555e+06			1.87664e+06	2.94525e+06		1.9342e+06	2.61689e+06	2.18555e+06	8.01429e+06	2.03678e+06	1.87664e+06	2.94525e+06	372584
Filamin-A OS=Mus musculus GN=Flna PE=1 SV=5	FGGEHVPNSPFQVTALAGDQPTVQTPLR		3509960	34200900			5114680	87937900			3.50996e+06	8.23761e+06			2.40079e+06	1.79097e+07		1.90495e+06	3.50996e+06	8.23761e+06	5.0605e+06	2.14626e+06	2.40079e+06	1.79097e+07	4.30776e+06
Filamin-A OS=Mus musculus GN=Flna PE=1 SV=5	FVPREEGPYEVEVTYDGVPVPGSPFPLEAVAPTKPSKVK			36793200				101319000				8.86199e+06				2.06349e+07		3.30968e+06	2.65369e+06	8.86199e+06	8.3328e+06	2.49152e+07	1.61561e+07	2.06349e+07	2.47411e+07
Filamin-A OS=Mus musculus GN=Flna PE=1 SV=5	GAGTGGLGLAVEGPSEAK		678902	12457200			1945690	24891704			678903	3.00043e+06			913290	5.06951e+06		5.80271e+06	678903	3.00043e+06	1.71208e+06	1.53205e+06	913290	5.06951e+06	1.77176e+06
Filamin-A OS=Mus musculus GN=Flna PE=1 SV=5	GDAVRDVDIIDHHDNTYTVK							12633000								2.57287e+06						3.90793e+06	1.22578e+06	2.57287e+06	1.07347e+06
Filamin-A OS=Mus musculus GN=Flna PE=1 SV=5	GKLDVQFSGLAK			2630520				4805740				633586				978750		1.27252e+06	3.56909e+06	633586	712844	713352	558276	978750	389237
Filamin-A OS=Mus musculus GN=Flna PE=1 SV=5	GLGLSKAYVGQK							4394090								894912						332952	3.63037e+06	894912	3.40638e+06
Filamin-A OS=Mus musculus GN=Flna PE=1 SV=5	GLVEPVDVVDNADGTQTVNYVPSR			2788740				8880625				671694				1.80865e+06		159569	378912	671694	3.79053e+06	2.03995e+06	322454	1.80865e+06	1.7417e+06
Filamin-A OS=Mus musculus GN=Flna PE=1 SV=5	GTVEPQLEAR			12560300				203202				3.02527e+06				41384.9		3.48994e+06	2.89326e+06	3.02527e+06	3.89956e+06	28981.9	64661.8	41384.9	157324
Filamin-A OS=Mus musculus GN=Flna PE=1 SV=5	HAGKAPLR			784180								188877						1.29508e+06	79639.7	188877	99919.7
Filamin-A OS=Mus musculus GN=Flna PE=1 SV=5	IANLQTDLSDGLR		638337	5207650			1803160	10806187			638338	1.25431e+06			846388	2.20082e+06		275629	638338	1.25431e+06	249715	8.13619e+06	846388	2.20082e+06	1.6113e+06
Filamin-A OS=Mus musculus GN=Flna PE=1 SV=5	IKVSGLGDKVDVGKDQEFTVK			8975660				18089600				2.16187e+06				3.68418e+06		2.10185e+06	1.68184e+06	2.16187e+06	1.25004e+06	1.18837e+06	2.69432e+06	3.68418e+06	8.21972e+06
Filamin-A OS=Mus musculus GN=Flna PE=1 SV=5	IVSPSGAAVPCKVEPGLGADNSVVR		847555	30599100			1305840	75289200			847556	7.37008e+06			612950	1.53336e+07		1.77483e+06	847556	7.37008e+06	947332	9.11307e+06	612950	1.53336e+07	4.28093e+06
Filamin-A OS=Mus musculus GN=Flna PE=1 SV=5	KGEITGEVR		628537				833950				628538				391449			382048	628538	590712	1.68867e+06	771302	391449	990204	249830
Filamin-A OS=Mus musculus GN=Flna PE=1 SV=5	KRAEFTVETR		361977								361978							279312	361978	372256	174475
Filamin-A OS=Mus musculus GN=Flna PE=1 SV=5	LDVQFSGLAK			1850180				4990290				445633				1.01634e+06		342671	434819	445633	4.09894e+06	2.49492e+06	2.88968e+06	1.01634e+06	1.49689e+06
Filamin-A OS=Mus musculus GN=Flna PE=1 SV=5	LIALLEVLSQK			1475980				2488733				355504				506862		430313	868849	355504	1.9717e+06	548695	845211	506862	633247
Filamin-A OS=Mus musculus GN=Flna PE=1 SV=5	LKPGAPLRPK			20736500			2067390	33853200				4.99458e+06			970415	6.89463e+06		1.06958e+06	2.88777e+06	4.99458e+06	3.28381e+06	2.1359e+06	970415	6.89463e+06	1.98237e+07
Filamin-A OS=Mus musculus GN=Flna PE=1 SV=5	LLGWIQNKLPQLPITNFSR			3819920				15760200				920064				3.20976e+06		678371	261524	920064	2.73521e+06	1.2785e+06	1.69407e+07	3.20976e+06	6.38833e+06
Filamin-A OS=Mus musculus GN=Flna PE=1 SV=5	LLGWIQNKLPQLPITNFSRDWQSGR							1543820								314419						185893	223039	314419	322902
Filamin-A OS=Mus musculus GN=Flna PE=1 SV=5	LTVSSLQESGLKVNQPASFAVSLNGAK							500369								101907						31341.9	109167	101907	68917.8
Filamin-A OS=Mus musculus GN=Flna PE=1 SV=5	LVSNHSLHETSSVFVDSLTK			13712000			1026330	28031900				3.30266e+06			481751	5.70905e+06		1.80449e+06	5.90826e+06	3.30266e+06	5.81333e+06	4.00341e+06	481751	5.70905e+06	1.28172e+06
Filamin-A OS=Mus musculus GN=Flna PE=1 SV=5	NGHVGISFVPK							1553380								316366						196715	368936	316366	462224
Filamin-A OS=Mus musculus GN=Flna PE=1 SV=5	RAEFTVETR						2815920								1.32177e+06							1.14792e+06	1.32177e+06	4.86618e+06	4.0364e+06
Filamin-A OS=Mus musculus GN=Flna PE=1 SV=5	RLTVSSLQESGLK							1053810								214622						327381	76323.5	214622	243375
Filamin-A OS=Mus musculus GN=Flna PE=1 SV=5	SAGQGEVLVYVEDPAGHQEEAK			5571780			1232100					1.34202e+06			578338			420387	1.08505e+07	1.34202e+06	883405	251533	578338	919005	183693
Filamin-A OS=Mus musculus GN=Flna PE=1 SV=5	SNFTVDCSK							6433080								1.31018e+06						1.05671e+06	1.15751e+06	1.31018e+06	2.24367e+06
Filamin-A OS=Mus musculus GN=Flna PE=1 SV=5	SPFEVYVDKSQGDASK			940744			751563	7700450				226587			352778	1.56829e+06		152513	72656.1	226587	225970	1.82687e+06	352778	1.56829e+06	934993
Filamin-A OS=Mus musculus GN=Flna PE=1 SV=5	SPFSVGVSPSLDLSK						1239490	7368900							581806	1.50077e+06						4.41944e+06	581806	1.50077e+06	3.24855e+06
Filamin-A OS=Mus musculus GN=Flna PE=1 SV=5	SPFSVGVSPSLDLSKIK						214939	4124600							100891	840027						177916	100891	840027	282479
Filamin-A OS=Mus musculus GN=Flna PE=1 SV=5	SPYTVTVGQACNPAACR		698696	6922990			1191830	20546000			698697	1.66747e+06			559435	4.18445e+06		1.62962e+06	698697	1.66747e+06	474780	1.70093e+06	559435	4.18445e+06	1.793e+06
Filamin-A OS=Mus musculus GN=Flna PE=1 SV=5	TAGKGKLDVQFSGLAK							12767700								2.6003e+06						2.55684e+06	650352	2.6003e+06	2.05584e+06
Filamin-A OS=Mus musculus GN=Flna PE=1 SV=5	TAGKGKLDVQFSGLAKGDAVR							4795410								976646						270736	1.26576e+06	976646	671226
Filamin-A OS=Mus musculus GN=Flna PE=1 SV=5	TFSVWYVPEVTGTHK			800287								192757						113733	218978	192757	375091
Filamin-A OS=Mus musculus GN=Flna PE=1 SV=5	TGVAVNKPAEFTVDAK			30483200				59017800				7.34216e+06				1.20197e+07		1.31084e+07	1.63125e+07	7.34216e+06	3.58703e+07	7.14916e+06	1.47401e+07	1.20197e+07	2.00454e+06
Filamin-A OS=Mus musculus GN=Flna PE=1 SV=5	TGVAVNKPAEFTVDAKHAGKAPLR							4374170								890855						147310	1.74707e+06	890855	1.29949e+06
Filamin-A OS=Mus musculus GN=Flna PE=1 SV=5	TGVELGKPTHFTVNAK							19571800								3.98604e+06						5.3772e+06	4.66786e+06	3.98604e+06	5.73928e+06
Filamin-A OS=Mus musculus GN=Flna PE=1 SV=5	THEAEIVEGENHTYCIR			1681600				3976130				405029				809789		2.53107e+06	266127	405029	780130	300597	905136	809789	1.59722e+06
Filamin-A OS=Mus musculus GN=Flna PE=1 SV=5	TPCEEILVK							4996480								1.0176e+06						1.81993e+06	871099	1.0176e+06	1.21639e+06
Filamin-A OS=Mus musculus GN=Flna PE=1 SV=5	VAQPSITDNKDGTVTVR			12030000				2459120				2.89754e+06				500831		4.78677e+06	5.75329e+06	2.89754e+06	1.20732e+06	272246	564207	500831	361151
Filamin-A OS=Mus musculus GN=Flna PE=1 SV=5	VASKIVSPSGAAVPCKVEPGLGADNSVVR			1198080				15224100				288569				3.10058e+06		252408	1.27302e+06	288569	523150	3.4796e+06	8.43164e+06	3.10058e+06	2.33168e+07
Filamin-A OS=Mus musculus GN=Flna PE=1 SV=5	VATVPQHATSGPGPADVSK		901782	1223960			5292980	16206500			901783	294802			2.48448e+06	3.30066e+06		318694	901783	294802	75259.4	3.29349e+06	2.48448e+06	3.30066e+06	3.82133e+06
Filamin-A OS=Mus musculus GN=Flna PE=1 SV=5	VATVPQHATSGPGPADVSKVVAK			8992610				73895200				2.16595e+06				1.50497e+07		1.23693e+06	4.60862e+06	2.16595e+06	1.05105e+06	8.86102e+06	1.30668e+07	1.50497e+07	2.26611e+07
Filamin-A OS=Mus musculus GN=Flna PE=1 SV=5	VGSAADIPINISETDLSLLTATVVPPSGREEPCLLKR							16870900								3.43597e+06						336083	1.4703e+07	3.43597e+06	2.0008e+06
Filamin-A OS=Mus musculus GN=Flna PE=1 SV=5	VGTECGNQK			1037030								249779						238596	311885	249779	133689
Filamin-A OS=Mus musculus GN=Flna PE=1 SV=5	VHGPGIQSGTTNKPNKFTVETR			9912960				16092000				2.38763e+06				3.27734e+06		2.3722e+06	3.17344e+06	2.38763e+06	819846	5.42954e+06	1.73187e+06	3.27734e+06	1.52999e+06
Filamin-A OS=Mus musculus GN=Flna PE=1 SV=5	VHSPSGALEECYVTEIDQDKYAVR			2962360				24429300				713512				4.97533e+06		549398	153355	713512	951790	4.66618e+06	4.93728e+06	4.97533e+06	8.76513e+06
Filamin-A OS=Mus musculus GN=Flna PE=1 SV=5	VKAEGPGLNR						763930								358583							278868	358583	183102	517872
Filamin-A OS=Mus musculus GN=Flna PE=1 SV=5	VKAFGPGLQGGNAGSPAR							1308290								266450						505231	109974	266450	212243
Filamin-A OS=Mus musculus GN=Flna PE=1 SV=5	VKESITR						720670								338277							1.19191e+06	338277	485403	63231.8
Filamin-A OS=Mus musculus GN=Flna PE=1 SV=5	VKETADFKVYTK			2114790				2895270				509367				589658		2.19516e+06	415547	509367	216793	491072	412368	589658	172113
Filamin-A OS=Mus musculus GN=Flna PE=1 SV=5	VKVEPSHDASK						815057								382581							1.05235e+06	382581	317287	308768
Filamin-A OS=Mus musculus GN=Flna PE=1 SV=5	VKVEPSHDASKVKAEGPGLNR			4643640				2460330				1.11846e+06				501077		347767	535507	1.11846e+06	186494	354615	500088	501077	1.86003e+06
Filamin-A OS=Mus musculus GN=Flna PE=1 SV=5	VPVHDVTDASK							250547								51027.3						53275.5	51220.9	51027.3	18782.6
Filamin-A OS=Mus musculus GN=Flna PE=1 SV=5	VQVQDNEGCSVEATVK			3514660				6909110				846539				1.40713e+06		709841	472137	846539	1.0374e+06	3.30538e+06	3.32541e+06	1.40713e+06	830008
Filamin-A OS=Mus musculus GN=Flna PE=1 SV=5	VRAWGPGLEGGIVGK						130792	5833650							61393.1	1.1881e+06						458798	61393.1	1.1881e+06	233664
Filamin-A OS=Mus musculus GN=Flna PE=1 SV=5	VRVHGPGIQSGTTNKPNKFTVETR			4380620				5658910				1.05511e+06				1.15251e+06		536069	416482	1.05511e+06	281843	2.04033e+06	446904	1.15251e+06	1.1241e+06
Filamin-A OS=Mus musculus GN=Flna PE=1 SV=5	VSGLGDKVDVGKDQEFTVK			464730				11970200				111935				2.43788e+06		27447.7	56657.2	111935	239738	1.46845e+06	1.84848e+06	2.43788e+06	3.72777e+06
Filamin-A OS=Mus musculus GN=Flna PE=1 SV=5	VSGQGLHEGHTFEPAEFIIDTR							4314730								878749						972501	342046	878749	1.14822e+06
Filamin-A OS=Mus musculus GN=Flna PE=1 SV=5	VTAQGPGLEPSGNIANK			10727300				22077087				2.58377e+06				4.49628e+06		2.40907e+06	955371	2.58377e+06	4.70441e+06	5.4551e+06	1.57014e+07	4.49628e+06	3.99333e+06
Filamin-A OS=Mus musculus GN=Flna PE=1 SV=5	VTVLFAGQHIAK							2648950								539492						531712	586146	539492	622610
Filamin-A OS=Mus musculus GN=Flna PE=1 SV=5	VVAKGLGLSK			581218								139992						229116	606121	139992	419093
Filamin-A OS=Mus musculus GN=Flna PE=1 SV=5	YGGDEIPFSPYR							1736600								353681						618490	1.0766e+06	353681	113379
Filamin-A OS=Mus musculus GN=Flna PE=1 SV=5	YGGQPVPNFPSKLQVEPAVDTSGVQCYGPGIEGQGVFREATTEFSVDAR			3698490								890816						649803	950878	890816	366804
Filamin-A OS=Mus musculus GN=Flna PE=1 SV=5	YNDQHIPGSPFTAR			5733690				10683000				1.38101e+06				2.17573e+06		6.5247e+06	6.95373e+06	1.38101e+06	2.81773e+06	3.68771e+06	8.31889e+06	2.17573e+06	3.89681e+06
Filamin-A OS=Mus musculus GN=Flna PE=1 SV=5	YVICVR			1525500				3606750				367431				734560		441469	1.42032e+06	367431	1.48001e+06	395030	874778	734560	560664
Filamin-B OS=Mus musculus GN=Flnb PE=1 SV=3	LIALLEVLSQK			1475980				1994120				355504				406128		84568.1	1.39441e+06	355504	121816	240841	286820	406128	473937
Filamin-B OS=Mus musculus GN=Flnb PE=1 SV=3	LVSPGSANETSSILVESVTR			736827				2129190				177472				433637		96832.8	175615	177472	27794.6	486703	992350	433637	192921
Four and a half LIM domains protein 1 OS=Mus musculus GN=Fhl1 PE=2 SV=3	AIVAGDQNVEYK							1176690								239648						196159	94289.8	239648	606541
Four and a half LIM domains protein 1 OS=Mus musculus GN=Fhl1 PE=2 SV=3	FTAVEDQYYCVDCYK							222598								45335.1						14936.7	14869.9	45335.1	31405.2
Four and a half LIM domains protein 1 OS=Mus musculus GN=Fhl1 PE=2 SV=3	QVIGTGSFFPK							366703								74683.9						80134.5	11996.9	74683.9	349409
Fructose-bisphosphate aldolase A OS=Mus musculus GN=Aldoa PE=1 SV=2	AAQEEYIKR		118126								118127							103290	118127	231191	205917
Fructose-bisphosphate aldolase A OS=Mus musculus GN=Aldoa PE=1 SV=2	ADDGRPFPQVIK							964666								196467						257579	85636.2	196467	222653
Fructose-bisphosphate aldolase A OS=Mus musculus GN=Aldoa PE=1 SV=2	ALANSLACQGK							2413360								491511						399529	2.77213e+06	491511	854077
Fructose-bisphosphate aldolase A OS=Mus musculus GN=Aldoa PE=1 SV=2	ALQASALK							4539880								924604						331560	1.80672e+06	924604	326732
Fructose-bisphosphate aldolase A OS=Mus musculus GN=Aldoa PE=1 SV=2	ELSDIAHR							817445								166483						930069	181111	166483	45207
Fructose-bisphosphate aldolase A OS=Mus musculus GN=Aldoa PE=1 SV=2	GILAADESTGSIAK							3071420								625534						329174	1.67606e+06	625534	241915
Fructose-bisphosphate aldolase A OS=Mus musculus GN=Aldoa PE=1 SV=2	IGEHTPSALAIMENANVLAR							1573260								320414						1.20864e+06	133136	320414	468905
Fructose-bisphosphate aldolase A OS=Mus musculus GN=Aldoa PE=1 SV=2	LQSIGTENTEENRR							1918690								390766						352114	459999	390766	32366.4
G2 and S phase-expressed protein 1 OS=Mus musculus GN=Gtse1 PE=1 SV=2	CIAASLDLNR						302221								141860							198139	141860	283930	62296.7
G2 and S phase-expressed protein 1 OS=Mus musculus GN=Gtse1 PE=1 SV=2	ESSTSQPPSQAGPQKR						389799								182969							47904	182969	126440	177461
G2 and S phase-expressed protein 1 OS=Mus musculus GN=Gtse1 PE=1 SV=2	IGPAASR						3729720								1.7507e+06							6.37895e+06	1.7507e+06	1.38782e+06	4.18495e+06
G2 and S phase-expressed protein 1 OS=Mus musculus GN=Gtse1 PE=1 SV=2	SGRIGPAASR						147222								69105.2							47638.1	69105.2	81006.1	111827
G2 and S phase-expressed protein 1 OS=Mus musculus GN=Gtse1 PE=1 SV=2	SSTSGSASSLESGVYR						589072								276506							34979.6	276506	452014	417010
G2 and S phase-expressed protein 1 OS=Mus musculus GN=Gtse1 PE=1 SV=2	VPTLSPLTQQPQTPEQR						637635								299301							410666	299301	98318.4	253979
Galectin-9 OS=Mus musculus GN=Lgals9 PE=1 SV=1	FEEGGYVVCNTK							320357								65244.9						269768	137088	65244.9	27829.8
Galectin-9 OS=Mus musculus GN=Lgals9 PE=1 SV=1	FNENAVVR		870919	996734			1098909	1390325			870920	240073			515819	283157		310592	870920	240073	3.97135e+06	157893	515819	283157	1.7381e+06
Galectin-9 OS=Mus musculus GN=Lgals9 PE=1 SV=1	NTQINNSWGQEER		187430					267944			187431					54570.4		77669.6	187431	142946	162954	158307	20185.3	54570.4	33341.3
Gamma-adducin OS=Mus musculus GN=Add3 PE=1 SV=2	GLSFSEATASTLVK			3649201				423203				878944				86190.8		1.15648e+06	534628	878944	598816	22089.5	158896	86190.8	63030.7
Gamma-adducin OS=Mus musculus GN=Add3 PE=1 SV=2	ISKEQDHIIIIPR			2058280								495756						927806	352007	495756	497970
Gamma-adducin OS=Mus musculus GN=Add3 PE=1 SV=2	LADLFGWAHLANTYISVR			1207610								290864						1.45668e+06	1.41857e+06	290864	146992
Gamma-adducin OS=Mus musculus GN=Add3 PE=1 SV=2	SSDTSPAVVTTPPPPSMPHKER			431532								103939						29814.7	74541.1	103939	55625
Gamma-adducin OS=Mus musculus GN=Add3 PE=1 SV=2	TGYAYRHPLVR			5644120								1.35944e+06						1.77469e+06	849481	1.35944e+06	267361
Gamma-adducin OS=Mus musculus GN=Add3 PE=1 SV=2	TLDNLGYR			7938610				8283780				1.91209e+06				1.6871e+06		3.19324e+06	806415	1.91209e+06	3.13556e+06	6.19366e+06	5.11591e+06	1.6871e+06	1.21668e+06
Gamma-adducin OS=Mus musculus GN=Add3 PE=1 SV=2	VGEIEFEGLMR			1802438								434134						123767	1.01235e+06	434134	524548
Gamma-adducin OS=Mus musculus GN=Add3 PE=1 SV=2	VNIIGEVVDQGSTDLK			2.40675e+06				2316100				579688				471703		169273	179481	579688	435180	1.08358e+06	1.17688e+06	471703	446949
Gamma-adducin OS=Mus musculus GN=Add3 PE=1 SV=2	VNVPEESR			211350								50905.9						30067.8	44433	50905.9	43518.3
Gamma-tubulin complex component 2 OS=Mus musculus GN=Tubgcp2 PE=2 SV=2	AAPQVPVPR						5942020								2.78913e+06							5.98746e+06	2.78913e+06	4.5972e+06	1.09914e+07
Gamma-tubulin complex component 2 OS=Mus musculus GN=Tubgcp2 PE=2 SV=2	EIIYTLKER						881618								413824							671638	413824	1.04595e+06	2.81198e+06
Gamma-tubulin complex component 2 OS=Mus musculus GN=Tubgcp2 PE=2 SV=2	GPSAPAPR						4065470								1.9083e+06							865744	1.9083e+06	727200	1.02715e+06
Gamma-tubulin complex component 2 OS=Mus musculus GN=Tubgcp2 PE=2 SV=2	IAEFSR						1732000								812986							1.3853e+06	812986	1.02764e+06	528240
Gamma-tubulin complex component 2 OS=Mus musculus GN=Tubgcp2 PE=2 SV=2	ILPVAASYSTVTR		2448730		513543		8249560		944034		2.44873e+06		2.04382e+06		3.87227e+06		1.764e+06	3.43585e+06	2.44873e+06	1.05597e+06	2.04382e+06	6.72997e+06	3.87227e+06	3.57763e+06	1.764e+06
Gamma-tubulin complex component 2 OS=Mus musculus GN=Tubgcp2 PE=2 SV=2	LTLDQGSVQGPPTETER		359293				1833220				359294				860498			234054	359294	366668	79338	951500	860498	225037	665998
Gamma-tubulin complex component 2 OS=Mus musculus GN=Tubgcp2 PE=2 SV=2	QLGSVSTGSTLQQSLELTR						566627								265970							1.37987e+06	265970	275339	279725
Gamma-tubulin complex component 2 OS=Mus musculus GN=Tubgcp2 PE=2 SV=2	TFLVDPNLDLSIR						2499470								1.17323e+06							1.12619e+06	1.17323e+06	933961	472530
Gamma-tubulin complex component 2 OS=Mus musculus GN=Tubgcp2 PE=2 SV=2	TPEDFLK						1580200								741733							435717	741733	1.1204e+06	296472
Gamma-tubulin complex component 2 OS=Mus musculus GN=Tubgcp2 PE=2 SV=2	TPYVTTTVSAHSAK		798538				870509				798539				408610			2.98163e+06	798539	823992	276266	368614	408610	206843	1.64998e+06
Gamma-tubulin complex component 2 OS=Mus musculus GN=Tubgcp2 PE=2 SV=2	VLLDFLMEEK						223278								104805							48934.5	104805	441254	73941.7
Gamma-tubulin complex component 2 OS=Mus musculus GN=Tubgcp2 PE=2 SV=2	YITAQPLAGR		1933840			179273					1933841			494783				1.49562e+06	1933841	764808	1.52729e+06	494783	247478	270687	1.07275e+06
Gamma-tubulin complex component 2 OS=Mus musculus GN=Tubgcp2 PE=2 SV=2	YTVLPQQIPSFLQK		446291								446292							113951	446292	514765	646895
Gamma-tubulin complex component 3 OS=Mus musculus GN=Tubgcp3 PE=2 SV=2	AALEELQR		1648920		650371		3596240				1648921		2.58837e+06		1.68804e+06			2.51608e+06	1648921	2.10423e+06	2.58837e+06	2.16056e+06	1.68804e+06	1.58448e+06	1.95913e+06
Gamma-tubulin complex component 3 OS=Mus musculus GN=Tubgcp3 PE=2 SV=2	ATNAQFDSPEILK						765168								359164							1.12207e+06	359164	184077	281603
Gamma-tubulin complex component 3 OS=Mus musculus GN=Tubgcp3 PE=2 SV=2	AVFDQIIELQNAQDVMYR						552754								259458							185264	259458	187401	197537
Gamma-tubulin complex component 3 OS=Mus musculus GN=Tubgcp3 PE=2 SV=2	DAADLFTDLENAFQGK						848446								398254							217491	398254	264530	500667
Gamma-tubulin complex component 3 OS=Mus musculus GN=Tubgcp3 PE=2 SV=2	DILYVFQGIDGK						1102970								517725							892877	517725	148342	1.40191e+06
Gamma-tubulin complex component 3 OS=Mus musculus GN=Tubgcp3 PE=2 SV=2	EADAALFSELHR						1468800								689442							7.90717e+06	689442	282741	838542
Gamma-tubulin complex component 3 OS=Mus musculus GN=Tubgcp3 PE=2 SV=2	EGDPGGTLEVTEAALVR		338690				1749360				338691				821135			136089	338691	259733	50641.9	2.22383e+06	821135	1.51191e+06	843797
Gamma-tubulin complex component 3 OS=Mus musculus GN=Tubgcp3 PE=2 SV=2	EIEGQWGVTAAEEEEENKR						948263								445107							1.36339e+06	445107	611603	115383
Gamma-tubulin complex component 3 OS=Mus musculus GN=Tubgcp3 PE=2 SV=2	KVLLIGK						1501580								704829							502492	704829	4.87339e+06	1.42503e+06
Gamma-tubulin complex component 3 OS=Mus musculus GN=Tubgcp3 PE=2 SV=2	LAWTLTGNQPSSQTPTSK						745939								350138							534432	350138	294667	61240.2
Gamma-tubulin complex component 3 OS=Mus musculus GN=Tubgcp3 PE=2 SV=2	LLVWTYDPK						1787120								838859							224284	838859	405972	549615
Gamma-tubulin complex component 3 OS=Mus musculus GN=Tubgcp3 PE=2 SV=2	MEYILTDIR						799252								375162							143131	375162	132069	673829
Gamma-tubulin complex component 3 OS=Mus musculus GN=Tubgcp3 PE=2 SV=2	SEADVAQQFQFAVR		187541				1713740				187542				804415			52179.2	187542	40108.7	191200	397747	804415	627457	376825
Gamma-tubulin complex component 3 OS=Mus musculus GN=Tubgcp3 PE=2 SV=2	TLAALVDHCQGR						1240030								582060							905954	582060	799452	354043
Gamma-tubulin complex component 3 OS=Mus musculus GN=Tubgcp3 PE=2 SV=2	VIGSNFAPTVER		267558								267559							54119.4	267559	405732	571859
Gamma-tubulin complex component 3 OS=Mus musculus GN=Tubgcp3 PE=2 SV=2	VTSYASLFAQALPR						721191								338521							336179	338521	1.36904e+06	727593
Gamma-tubulin complex component 3 OS=Mus musculus GN=Tubgcp3 PE=2 SV=2	YLLLGQGDFIR						2140660								1.00481e+06							1.0369e+07	1.00481e+06	4.55297e+06	1.4268e+06
General transcription factor II-I OS=Mus musculus GN=Gtf2i PE=1 SV=3	AFVNTR						875682								411038							700012	411038	437075	317393
General transcription factor II-I OS=Mus musculus GN=Gtf2i PE=1 SV=3	APSYLEISSMR						235477								110531							247542	110531	219567	146161
General transcription factor II-I OS=Mus musculus GN=Gtf2i PE=1 SV=3	APSYLEISSMRR						204147								95825.3							490683	95825.3	269240	72695
General transcription factor II-I OS=Mus musculus GN=Gtf2i PE=1 SV=3	AQVVMSALPAEDEESSESR						748656								351413							195931	351413	318758	317110
General transcription factor II-I OS=Mus musculus GN=Gtf2i PE=1 SV=3	FAEALGSTEAK		313286				1565460	256035			313287				734814	52145		227069	313287	365578	100111	150240	734814	52145	97810.6
General transcription factor II-I OS=Mus musculus GN=Gtf2i PE=1 SV=3	ILLAKER		381525				709671				381526				333114			402178	381526	130946	140485	413554	333114	683853	517086
General transcription factor II-I OS=Mus musculus GN=Gtf2i PE=1 SV=3	SPTWFGIPR						893854								419568							992496	419568	110917	317690
General transcription factor II-I OS=Mus musculus GN=Gtf2i PE=1 SV=3	VLAAEAER		2817240				7137990				2.81724e+06				3.35051e+06			7.18081e+06	2.81724e+06	2.02375e+06	479084	2.61209e+07	3.35051e+06	4.57177e+06	2.63165e+06
Glutamate dehydrogenase 1, mitochondrial OS=Mus musculus GN=Glud1 PE=1 SV=1	TAAYVNAIEK							208055								42373.2						88854.2	18179.8	42373.2	53076.9
Glutamate dehydrogenase 1, mitochondrial OS=Mus musculus GN=Glud1 PE=1 SV=1	YSTDVSVDEVK							1562420								318207						946929	1.37081e+06	318207	259424
Glyceraldehyde-3-phosphate dehydrogenase OS=Mus musculus GN=Gapdh PE=1 SV=2	DGRGAAQNIIPASTGAAK						102857		411450						48280.7		768826					52462.8	48280.7	340715	768826
Glyceraldehyde-3-phosphate dehydrogenase OS=Mus musculus GN=Gapdh PE=1 SV=2	GAAQNIIPASTGAAK			2752820			5337760					663043			2.5055e+06			1.07804e+06	1.76697e+06	663043	529084	7.21365e+06	2.5055e+06	794344	834033
Glyceraldehyde-3-phosphate dehydrogenase OS=Mus musculus GN=Gapdh PE=1 SV=2	GAAQNIIPASTGAAKAVGK		170361								170362							50090.8	170362	78138.4	85641.1
Glyceraldehyde-3-phosphate dehydrogenase OS=Mus musculus GN=Gapdh PE=1 SV=2	IVSNASCTTNCLAPLAK		717101				1044700	2086741			717102				490374	424991		662863	717102	753671	1.56629e+06	233783	490374	424991	435689
Glyceraldehyde-3-phosphate dehydrogenase OS=Mus musculus GN=Gapdh PE=1 SV=2	LEKPAKYDDIKK							413195								84152.6						59612.4	243962	84152.6	66285.6
Glyceraldehyde-3-phosphate dehydrogenase OS=Mus musculus GN=Gapdh PE=1 SV=2	LISWYDNEYGYSNR							532996								108552						39185.8	68089.8	108552	22483.7
Glyceraldehyde-3-phosphate dehydrogenase OS=Mus musculus GN=Gapdh PE=1 SV=2	VGVNGFGR						573616	10182800							269251	2.07386e+06						423163	269251	2.07386e+06	741536
Glyceraldehyde-3-phosphate dehydrogenase OS=Mus musculus GN=Gapdh PE=1 SV=2	VIHDNFGIVEGLMTTVHAITATQK			399491								96221.4						26308.3	119411	96221.4	74233.5
Glyceraldehyde-3-phosphate dehydrogenase OS=Mus musculus GN=Gapdh PE=1 SV=2	VPTPNVSVVDLTCR		370176				682660				370177				320435			63882.7	370177	2.56827e+06	678667	211371	320435	294693	277617
Glyceraldehyde-3-phosphate dehydrogenase OS=Mus musculus GN=Gapdh PE=1 SV=2	VVKQASEGPLK		368881								368882							130908	368882	250939	395785
Heat shock cognate 71 kDa protein OS=Mus musculus GN=Hspa8 PE=1 SV=1	ARFEELNADLFR		1925770				3541450				1.92577e+06				1.66233e+06			2.4636e+06	1.92577e+06	2.12084e+06	899285	421897	1.66233e+06	1.01904e+06	3.02362e+06
Heat shock cognate 71 kDa protein OS=Mus musculus GN=Hspa8 PE=1 SV=1	DAGTIAGLNVLR	1201690	5335150	5025960		4.08192e+06	11555300	231966		6.24271e+06	5.33515e+06	1.21055e+06		1.12658e+07	5.42396e+06	47243		6.24271e+06	5.33515e+06	1.21055e+06	1.5992e+07	1.12658e+07	5.42396e+06	47243	150994
Heat shock cognate 71 kDa protein OS=Mus musculus GN=Hspa8 PE=1 SV=1	FEELNADLFR		812164				2013780	40560.5			812165				945251	8260.86		902069	812165	1.36398e+06	1.12547e+06	167206	945251	8260.86	82475.8
Heat shock cognate 71 kDa protein OS=Mus musculus GN=Hspa8 PE=1 SV=1	IINEPTAAAIAYGLDK		495423	298311	379657	324145	1563620				495424	71851.2	1.51098e+06	894620	733950			150915	495424	71851.2	1.51098e+06	894620	733950	2.62237e+06	371358
Heat shock cognate 71 kDa protein OS=Mus musculus GN=Hspa8 PE=1 SV=1	IINEPTAAAIAYGLDKK		446736	4038400		445032	655309				446737	972687		1.22826e+06	307597			756016	446737	972687	788707	1.22826e+06	307597	749175	283128
Heat shock cognate 71 kDa protein OS=Mus musculus GN=Hspa8 PE=1 SV=1	IINEPTAAAIAYGLDKKVGAER						4985880								2.34033e+06							1.95227e+07	2.34033e+06	2.0801e+06	1.4732e+06
Heat shock cognate 71 kDa protein OS=Mus musculus GN=Hspa8 PE=1 SV=1	ITITNDKGR			770334	2248070		683947	377055				185542	8.94695e+06		321039	76792.2		326333	1.9046e+06	185542	8.94695e+06	78937.6	321039	76792.2	511491
Heat shock cognate 71 kDa protein OS=Mus musculus GN=Hspa8 PE=1 SV=1	LDKSQIHDIVLVGGSTR		685533				1240330				685534				582201			746459	685534	1.00192e+06	1.65142e+06	504902	582201	362498	897732
Heat shock cognate 71 kDa protein OS=Mus musculus GN=Hspa8 PE=1 SV=1	LRTACER						2188900								1.02745e+06							1.17046e+06	1.02745e+06	395484	712791
Heat shock cognate 71 kDa protein OS=Mus musculus GN=Hspa8 PE=1 SV=1	LSKEDIER	646864	1381490	1413030		1865380	7463390		4736040	3.36042e+06	1.38149e+06	340342		5.14832e+06	3.50325e+06		8.84964e+06	3.36042e+06	1.38149e+06	340342	826438	5.14832e+06	3.50325e+06	3.71581e+06	8.84964e+06
Heat shock cognate 71 kDa protein OS=Mus musculus GN=Hspa8 PE=1 SV=1	MKEIAEAYLGK						261241								122625							50578.3	122625	193573	223021
Heat shock cognate 71 kDa protein OS=Mus musculus GN=Hspa8 PE=1 SV=1	NQVAMNPTNTVFDAKR		345704								345705							1.10164e+06	345705	1.04589e+06	268291
Heat shock cognate 71 kDa protein OS=Mus musculus GN=Hspa8 PE=1 SV=1	NSLESYAFNMK						877241								411770							493918	411770	369847	1.58408e+06
Heat shock cognate 71 kDa protein OS=Mus musculus GN=Hspa8 PE=1 SV=1	QATKDAGTIAGLNVLR			2800970	835655	977037	643157	910214				674640	3.32577e+06	2.69655e+06	301893	185377		4.06569e+06	812250	674640	3.32577e+06	2.69655e+06	301893	185377	637198
Heat shock cognate 71 kDa protein OS=Mus musculus GN=Hspa8 PE=1 SV=1	RLIGR		3765640								3765641							6.85042e+06	3765641	2.29536e+06	1.42071e+06
Heat shock cognate 71 kDa protein OS=Mus musculus GN=Hspa8 PE=1 SV=1	SQIHDIVLVGGSTR				121685								484290					743149	587364	190920	484290
Heat shock cognate 71 kDa protein OS=Mus musculus GN=Hspa8 PE=1 SV=1	STAGDTHLGGEDFDNR				956640	2286220	920146		1200370				3.80727e+06	6.3098e+06	431909		2.24298e+06	3.49892e+06	3.0223e+06	1.69184e+07	3.80727e+06	6.3098e+06	431909	2.92305e+06	2.24298e+06
Heat shock cognate 71 kDa protein OS=Mus musculus GN=Hspa8 PE=1 SV=1	TTPSYVAFTDTER	2730170	7907840	1836900		7137199	16459200	1769200	5383770	1.41831e+07	7.90784e+06	442435		1.96982e+07	7.72581e+06	360320	1.006e+07	1.41831e+07	7.90784e+06	442435	2.28155e+07	1.96982e+07	7.72581e+06	360320	1.006e+07
Heat shock cognate 71 kDa protein OS=Mus musculus GN=Hspa8 PE=1 SV=1	TVTNAVVTVPAYFNDSQR			389189		317746	3901790					93740		876959	1.83147e+06			215549	79703.6	93740	133532	876959	1.83147e+06	826263	2.71308e+06
Heat shock cognate 71 kDa protein OS=Mus musculus GN=Hspa8 PE=1 SV=1	VEIIANDQGNR		303360			670551	1560610				303361			1.85068e+06	732537			311752	303361	806358	196258	1.85068e+06	732537	2.4219e+06	1.72784e+06
Heat shock cognate 71 kDa protein OS=Mus musculus GN=Hspa8 PE=1 SV=1	VQVEYK		528055								528056							919398	528056	496192	167501
Heat shock cognate 71 kDa protein OS=Mus musculus GN=Hspa8 PE=1 SV=1	VQVEYKGETK	667509	1403360	2108950		3738120	3261380			3.46767e+06	1.40336e+06	507961		1.03169e+07	1.53086e+06			3.46767e+06	1.40336e+06	507961	1.80545e+06	1.03169e+07	1.53086e+06	3.01887e+07	3.65191e+06
Heat shock protein HSP 90-alpha OS=Mus musculus GN=Hsp90aa1 PE=1 SV=4	ADLINNLGTIAK		283554			331020					283555			913594				221542	283555	697522	281338	913594	646865	550024	1.20784e+06
Heat shock protein HSP 90-alpha OS=Mus musculus GN=Hsp90aa1 PE=1 SV=4	ALLFVPR		806178								806179							1.21067e+06	806179	380243	466982
Heat shock protein HSP 90-alpha OS=Mus musculus GN=Hsp90aa1 PE=1 SV=4	DQVANSAFVER				293458	383910							1.16792e+06	1.05957e+06				2.42658e+06	6.21385e+06	1.75022e+06	1.16792e+06	1.05957e+06	479642	839269	5.07491e+06
Heat shock protein HSP 90-alpha OS=Mus musculus GN=Hsp90aa1 PE=1 SV=4	GVVDSEDLPLNISR		2015080			971021					2.01508e+06			2.67995e+06				5.75833e+06	2.01508e+06	982591	5.97156e+06	2.67995e+06	7.53997e+06	1.57281e+07	489455
Heat shock protein HSP 90-alpha OS=Mus musculus GN=Hsp90aa1 PE=1 SV=4	YIDQEELNK				302972								1.20578e+06					837586	4.39723e+06	278007	1.20578e+06
Heat shock protein HSP 90-beta OS=Mus musculus GN=Hsp90ab1 PE=1 SV=3	ADHGEPIGR					285943	415441							789185	195005							789185	195005	82930.4	321727
Heat shock protein HSP 90-beta OS=Mus musculus GN=Hsp90ab1 PE=1 SV=3	ADLINNLGTIAK		283554			331020					283555			913594				377247	283555	359631	275789	913594	536734	3.26422e+06	856583
Heat shock protein HSP 90-beta OS=Mus musculus GN=Hsp90ab1 PE=1 SV=3	ALLFIPR		1027950								1.02795e+06							601692	1.02795e+06	582851	351360
Heat shock protein HSP 90-beta OS=Mus musculus GN=Hsp90ab1 PE=1 SV=3	EQVANSAFVER	217324				444167		201520		1.12899e+06				1.22587e+06		41042.3		1.12899e+06	125358	2.29691e+06	1.71787e+06	1.22587e+06	222356	41042.3	209408
Heat shock protein HSP 90-beta OS=Mus musculus GN=Hsp90ab1 PE=1 SV=3	GVVDSEDLPLNISR	107162	2015080	301386		971021	1047560			556705	2.01508e+06	72591.9		2.67995e+06	491716			556705	2.01508e+06	72591.9	99277.1	2.67995e+06	491716	550272	989444
Heat shock protein HSP 90-beta OS=Mus musculus GN=Hsp90ab1 PE=1 SV=3	IDIIPNPQER							267903								54562						20579.2	20821	54562	65375.2
Heat shock protein HSP 90-beta OS=Mus musculus GN=Hsp90ab1 PE=1 SV=3	LGIHEDSTNR		980265								980266							1.75239e+06	980266	1.35453e+06	867493
Heat shock protein HSP 90-beta OS=Mus musculus GN=Hsp90ab1 PE=1 SV=3	YIDQEELNK				302972								1.20578e+06					1.56328e+06	308507	2.0902e+06	1.20578e+06
Hematopoietic lineage cell-specific protein OS=Mus musculus GN=Hcls1 PE=1 SV=2	AALGYDYK							667757								135997						56381.9	374686	135997	168272
Hematopoietic lineage cell-specific protein OS=Mus musculus GN=Hcls1 PE=1 SV=2	AKFESLAEEK			615285				92271.9				148197				18792.5		317459	163146	148197	222278	6861.79	12538	18792.5	55522.1
Hematopoietic lineage cell-specific protein OS=Mus musculus GN=Hcls1 PE=1 SV=2	EVQQPSMPVEEPAAPAQLPK			15397380			940165	75343838				3.7086e+06			441306	1.53447e+07		1.35293e+06	8.64308e+06	3.7086e+06	2.10884e+06	1.03538e+06	441306	1.53447e+07	1.5521e+06
Hematopoietic lineage cell-specific protein OS=Mus musculus GN=Hcls1 PE=1 SV=2	EVQQPSMPVEEPAAPAQLPKK			1994890								480488						660397	1.87439e+06	480488	2.04814e+06
Hematopoietic lineage cell-specific protein OS=Mus musculus GN=Hcls1 PE=1 SV=2	GFGGKYGVER			1013110								244017						265298	627633	244017	368176
Hematopoietic lineage cell-specific protein OS=Mus musculus GN=Hcls1 PE=1 SV=2	GFGGQYGIQK		388557	255976			754960	6208900			388558	61654.5			354372	1.26452e+06		719720	388558	61654.5	181824	1.34996e+06	354372	1.26452e+06	165643
Hematopoietic lineage cell-specific protein OS=Mus musculus GN=Hcls1 PE=1 SV=2	GFGGQYGIQKDR			351913								84761.8						216224	70592	84761.8	69914
Hematopoietic lineage cell-specific protein OS=Mus musculus GN=Hcls1 PE=1 SV=2	GHFGLFPANYVKLL							446414								90918						136759	209988	90918	69551.1
Hematopoietic lineage cell-specific protein OS=Mus musculus GN=Hcls1 PE=1 SV=2	KTTPIEAASSGAR		350439					35369000			350440					7.20334e+06		572542	350440	499312	184169	2.71492e+06	3.69061e+06	7.20334e+06	1.80002e+07
Hematopoietic lineage cell-specific protein OS=Mus musculus GN=Hcls1 PE=1 SV=2	MSREVQQPSMPVEEPAAPAQLPK			1186750								285840						914274	397686	285840	293395
Hematopoietic lineage cell-specific protein OS=Mus musculus GN=Hcls1 PE=1 SV=2	SAVGFDYK			2515330								605841						1.02368e+06	564713	605841	1.19255e+06
Hematopoietic lineage cell-specific protein OS=Mus musculus GN=Hcls1 PE=1 SV=2	SAVGFDYKGEVEK			378002								91045.6						70316.9	86765.2	91045.6	74319.3
Hematopoietic lineage cell-specific protein OS=Mus musculus GN=Hcls1 PE=1 SV=2	SAVGFNEMEAPTTAYK			4283130				4471291				1.03163e+06				910635		356219	462517	1.03163e+06	5.25591e+06	439687	3.98997e+06	910635	538377
Hematopoietic lineage cell-specific protein OS=Mus musculus GN=Hcls1 PE=1 SV=2	SAVGHEYVADVEK			2055100								494990						1.27868e+06	652949	494990	1.36449e+06
Hematopoietic lineage cell-specific protein OS=Mus musculus GN=Hcls1 PE=1 SV=2	SAVGHEYVADVEKHSSQTDAAR		805236	847676			1311010				805237	204171			615377			68786.1	805237	204171	209281	526173	615377	138230	1.2361e+06
Hematopoietic lineage cell-specific protein OS=Mus musculus GN=Hcls1 PE=1 SV=2	TEHINIHQLR		1539210								1.53921e+06							507493	1.53921e+06	2.62144e+06	3.47203e+06
Hematopoietic lineage cell-specific protein OS=Mus musculus GN=Hcls1 PE=1 SV=2	TTPIEAASSGAR		6468310	229180520		1187130		214499821			6.46831e+06	5.52003e+07		3.2764e+06		4.36856e+07		1.78009e+07	6.46831e+06	5.52003e+07	2.07081e+06	3.2764e+06	1.4626e+07	4.36856e+07	1.2416e+07
Hematopoietic lineage cell-specific protein OS=Mus musculus GN=Hcls1 PE=1 SV=2	VDKSAVGFNEMEAPTTAYKK			1067530								257125						444504	43581.8	257125	408609
Hematopoietic lineage cell-specific protein OS=Mus musculus GN=Hcls1 PE=1 SV=2	VSEEHDILK			1006620								242454						404184	147099	242454	399905
Hematopoietic lineage cell-specific protein OS=Mus musculus GN=Hcls1 PE=1 SV=2	YGVEKDKR			2264600								545450						1.24299e+06	143409	545450	725219
Heterochromatin protein 1-binding protein 3 OS=Mus musculus GN=Hp1bp3 PE=1 SV=1	EASYSLIR			327366								78849.4						65511.9	142010	78849.4	94133.3
Heterochromatin protein 1-binding protein 3 OS=Mus musculus GN=Hp1bp3 PE=1 SV=1	GASGSFVVVQK			430260		703712						103632		1.9422e+06				151650	120625	103632	163023	1.9422e+06	2.00049e+06	5.34665e+06	634185
Heterochromatin protein 1-binding protein 3 OS=Mus musculus GN=Hp1bp3 PE=1 SV=1	GQLEQITGK			382044		421552						92019.1		1.16346e+06				53313.6	346255	92019.1	51056.3	1.16346e+06	6.26234e+06	1.32267e+06	743403
Heterochromatin protein 1-binding protein 3 OS=Mus musculus GN=Hp1bp3 PE=1 SV=1	LEDVLPLAFTR			325750								78460.2						89733.3	23165.8	78460.2	296333
Heterochromatin protein 1-binding protein 3 OS=Mus musculus GN=Hp1bp3 PE=1 SV=1	TGASVVAIR			203582								49034.9						57524	109765	49034.9	55127.6
Heterogeneous nuclear ribonucleoprotein A1 OS=Mus musculus GN=Hnrnpa1 PE=1 SV=2	LFIGGLSFETTDESLR							340885								69425.7						319127	71345.1	69425.7	50788.3
Heterogeneous nuclear ribonucleoprotein A1 OS=Mus musculus GN=Hnrnpa1 PE=1 SV=2	NQGGYGGSSSSSSYGSGR		556029								556030							1.44479e+06	556030	673504	151825
Heterogeneous nuclear ribonucleoprotein A1 OS=Mus musculus GN=Hnrnpa1 PE=1 SV=2	VVEPKR		815526								815527							434710	815527	1.30289e+06	314384
Heterogeneous nuclear ribonucleoprotein A3 OS=Mus musculus GN=Hnrnpa3 PE=1 SV=1	MEGHDPKEPEQLR						739835								347273							676298	347273	542153	777602
Heterogeneous nuclear ribonucleoprotein A3 OS=Mus musculus GN=Hnrnpa3 PE=1 SV=1	SSGSPYGGGYGSGGGSGGYGSR		1038790				665580	842214			1.03879e+06				312418	171528		1.18713e+06	1.03879e+06	738741	571109	81685.2	312418	171528	407378
Heterogeneous nuclear ribonucleoprotein A3 OS=Mus musculus GN=Hnrnpa3 PE=1 SV=1	SSGSPYGGGYGSGGGSGGYGSRRF							1447530								294808						216352	623732	294808	213717
Heterogeneous nuclear ribonucleoprotein A3 OS=Mus musculus GN=Hnrnpa3 PE=1 SV=1	VVEPKR						15553.1								7300.96							3325.81	7300.96	6864.98	8701.43
Heterogeneous nuclear ribonucleoprotein F OS=Mus musculus GN=Hnrnpf PE=1 SV=3	ATENDIYNFFSPLNPVR		261224								261225							1.01745e+06	261225	228089	559527
Heterogeneous nuclear ribonucleoprotein F OS=Mus musculus GN=Hnrnpf PE=1 SV=3	HSGPNSADSANDGFVR		865026				2542960				865027				1.19364e+06			467115	865027	780833	393289	3.1411e+06	1.19364e+06	2.67897e+06	2.73147e+06
Heterogeneous nuclear ribonucleoprotein F OS=Mus musculus GN=Hnrnpf PE=1 SV=3	ITGEAFVQFASQELAEK		1418050	99979.8			829999	576016			1.41805e+06	24081.3			389595	117313		95428.3	1.41805e+06	24081.3	351886	130472	389595	117313	712203
Heterogeneous nuclear ribonucleoprotein F OS=Mus musculus GN=Hnrnpf PE=1 SV=3	MLGPEGGEGYVVK		571021								571022							584207	571022	535591	3.47968e+06
Heterogeneous nuclear ribonucleoprotein F OS=Mus musculus GN=Hnrnpf PE=1 SV=3	MLGPEGGEGYVVKLR		1409020				1913510				1.40902e+06				898185			1.48741e+06	1.40902e+06	1.8646e+06	1.01113e+06	1.30597e+07	898185	1.44274e+06	1.77838e+06
Heterogeneous nuclear ribonucleoprotein F OS=Mus musculus GN=Hnrnpf PE=1 SV=3	RYIGIVK		1081820								1.08182e+06							328324	1.08182e+06	461234	3.11325e+06
Heterogeneous nuclear ribonucleoprotein F OS=Mus musculus GN=Hnrnpf PE=1 SV=3	VHIEIGPDGR		2178467	280442			3797690				2178468	67547.3			1.7826e+06			995943	2178468	67547.3	182206	1.43524e+06	1.7826e+06	1.01325e+06	2.85133e+06
Heterogeneous nuclear ribonucleoprotein H OS=Mus musculus GN=Hnrnph1 PE=1 SV=3	ATENDIYNFFSPLNPVR		261224								261225							333969	261225	652309	80541.7
Heterogeneous nuclear ribonucleoprotein H OS=Mus musculus GN=Hnrnph1 PE=1 SV=3	HTGPNSPDTANDGFVR		267479				1011620				267480				474846			925017	267480	148035	100392	918510	474846	183879	1.48249e+06
Heterogeneous nuclear ribonucleoprotein H OS=Mus musculus GN=Hnrnph1 PE=1 SV=3	STGEAFVQFASQEIAEK		552547				2357290	220814			552548				1.10649e+06	44971.8		897797	552548	1.03925e+06	503831	388388	1.10649e+06	44971.8	81494
Heterogeneous nuclear ribonucleoprotein H OS=Mus musculus GN=Hnrnph1 PE=1 SV=3	VHIEIGPDGR		2178467				1430970				2178468				671685			1.32213e+06	2178468	769985	1.88563e+06	630463	671685	1.9666e+06	704656
Heterogeneous nuclear ribonucleoprotein K OS=Mus musculus GN=Hnrnpk PE=2 SV=1	GGDLMAYDRR						128690								60406.4							54251.7	60406.4	63069	36092.6
Heterogeneous nuclear ribonucleoprotein K OS=Mus musculus GN=Hnrnpk PE=2 SV=1	IDEPLEGSEDR					276892								764205								764205	402024	554879	198821
Heterogeneous nuclear ribonucleoprotein K OS=Mus musculus GN=Hnrnpk PE=2 SV=1	TDYNASVSVPDSSGPER					394852	1144360							1.08977e+06	537153							1.08977e+06	537153	323804	523460
Heterogeneous nuclear ribonucleoprotein U OS=Mus musculus GN=Hnrnpu PE=1 SV=1	ADLMDR		7087250		181221		6274520		692174		7.08725e+06		721233		2.94521e+06		1.29338e+06	1.10359e+06	7.08725e+06	3.36222e+06	721233	5.26527e+06	2.94521e+06	471106	1.29338e+06
Heterogeneous nuclear ribonucleoprotein U OS=Mus musculus GN=Hnrnpu PE=1 SV=1	AEVEGKDLPEHAVLK						3441510	278675							1.61542e+06	56755.9						935696	1.61542e+06	56755.9	136099
Heterogeneous nuclear ribonucleoprotein U OS=Mus musculus GN=Hnrnpu PE=1 SV=1	APQCLGK		49031900			942507	52145380		11936700		4.90319e+07			2.60125e+06	2.44766e+07		2.23046e+07	3.14801e+07	4.90319e+07	2.8492e+07	4.3528e+07	2.60125e+06	2.44766e+07	3.178e+06	2.23046e+07
Heterogeneous nuclear ribonucleoprotein U OS=Mus musculus GN=Hnrnpu PE=1 SV=1	APQCLGKFIEIAAR		13905470	1319518			16003639	233931			13905471	317818			7.51197e+06	47643.2		3.40483e+06	13905471	317818	2.62194e+06	707241	7.51197e+06	47643.2	99878.5
Heterogeneous nuclear ribonucleoprotein U OS=Mus musculus GN=Hnrnpu PE=1 SV=1	ASYGVSK		1105200								1.1052e+06							4.26503e+06	1.1052e+06	1.19694e+07	1.56384e+06
Heterogeneous nuclear ribonucleoprotein U OS=Mus musculus GN=Hnrnpu PE=1 SV=1	ASYGVSKGK						883663								414784							298347	414784	442788	291547
Heterogeneous nuclear ribonucleoprotein U OS=Mus musculus GN=Hnrnpu PE=1 SV=1	AVVVCPKDEDYK		588458				559954				588459				262838			690590	588459	735235	180062	397094	262838	287494	69077.5
Heterogeneous nuclear ribonucleoprotein U OS=Mus musculus GN=Hnrnpu PE=1 SV=1	AVVVCPKDEDYKQR		2954530		934253		4824650		2423420		2.95453e+06		3.71817e+06		2.26465e+06		4.52834e+06	2.59031e+06	2.95453e+06	7.11428e+06	3.71817e+06	7.26616e+06	2.26465e+06	2.4402e+06	4.52834e+06
Heterogeneous nuclear ribonucleoprotein U OS=Mus musculus GN=Hnrnpu PE=1 SV=1	DEDYKQR		1282320		1677340		1544150				1282321		6.67554e+06		724811			2.30289e+06	1282321	2.13816e+06	6.67554e+06	627038	724811	1.37597e+06	967769
Heterogeneous nuclear ribonucleoprotein U OS=Mus musculus GN=Hnrnpu PE=1 SV=1	DIDIHEVR	461097	37831136	2141759	15709830	1583550	64157380	2234071	7022400	2.39537e+06	3.78311e+07	515863	6.25225e+07	4.37049e+06	3.01149e+07	454997	1.31219e+07	2.39537e+06	3.78311e+07	515863	6.25225e+07	4.37049e+06	3.01149e+07	454997	1.31219e+07
Heterogeneous nuclear ribonucleoprotein U OS=Mus musculus GN=Hnrnpu PE=1 SV=1	DLPEHAVLK	2549400	2933980			5094180	39524200			1.3244e+07	2933981			1.40596e+07	1.85523e+07			1.3244e+07	2933981	2.04911e+07	2.81461e+06	1.40596e+07	1.85523e+07	4.83186e+07	5.19105e+06
Heterogeneous nuclear ribonucleoprotein U OS=Mus musculus GN=Hnrnpu PE=1 SV=1	EDHGRGYFEYIEENKYSR		496946								496947							212500	496947	728275	274105
Heterogeneous nuclear ribonucleoprotein U OS=Mus musculus GN=Hnrnpu PE=1 SV=1	EKPYFPIPEDCTFIQNVPLEDR		41671510				913175	5730910			4.16715e+07				428637	1.16717e+06		4.77095e+07	4.16715e+07	5.28561e+06	3.85499e+07	2.31056e+06	428637	1.16717e+06	938401
Heterogeneous nuclear ribonucleoprotein U OS=Mus musculus GN=Hnrnpu PE=1 SV=1	FIEIAAR	1814860	2040900	3745201		3486120		4437190		9.42808e+06	2040901	902067		9.62144e+06		903690		9.42808e+06	2040901	902067	2.3906e+06	9.62144e+06	1.15306e+06	903690	1.60211e+06
Heterogeneous nuclear ribonucleoprotein U OS=Mus musculus GN=Hnrnpu PE=1 SV=1	FIEIAARK		1818140				12333300				1.81814e+06				5.78914e+06			6.89343e+06	1.81814e+06	7.84427e+06	862647	2.50562e+07	5.78914e+06	5.99447e+06	1.38168e+06
Heterogeneous nuclear ribonucleoprotein U OS=Mus musculus GN=Hnrnpu PE=1 SV=1	GKVCFEMK		721750		605896		1297810				721751		2.41137e+06		609181			2.11821e+06	721751	2.3826e+06	2.41137e+06	1.30166e+06	609181	2.95645e+06	477880
Heterogeneous nuclear ribonucleoprotein U OS=Mus musculus GN=Hnrnpu PE=1 SV=1	GPEEKKDCEVVMMIGLPGAGK		590849								590850							121137	590850	100047	4.3942e+06
Heterogeneous nuclear ribonucleoprotein U OS=Mus musculus GN=Hnrnpu PE=1 SV=1	GYFEYIEENK				525848		964395						2.09279e+06		452679			2.11447e+07	1.19936e+06	2.00574e+06	2.09279e+06	229576	452679	354928	166434
Heterogeneous nuclear ribonucleoprotein U OS=Mus musculus GN=Hnrnpu PE=1 SV=1	GYFEYIEENKYSR		15312206	2105951	243556		5231060	3075180			1.53122e+07	507238	969316		2.45541e+06	626299		2.68415e+06	1.53122e+07	507238	969316	3.24179e+06	2.45541e+06	626299	1.00732e+06
Heterogeneous nuclear ribonucleoprotein U OS=Mus musculus GN=Hnrnpu PE=1 SV=1	HAAENPGKYNILGTNTIMDK		5778150				6304160				5.77815e+06				2.95912e+06			1.18551e+07	5.77815e+06	3.2875e+06	1.86366e+06	1.58824e+06	2.95912e+06	1.14722e+06	5.23112e+06
Heterogeneous nuclear ribonucleoprotein U OS=Mus musculus GN=Hnrnpu PE=1 SV=1	HLYTKDIDIHEVR		666508								666509							909622	666509	1.54591e+06	1.65706e+06
Heterogeneous nuclear ribonucleoprotein U OS=Mus musculus GN=Hnrnpu PE=1 SV=1	KAEVEGKDLPEHAVLK		5811670	642422	337936						5.81167e+06	154734	1.34493e+06					1.94077e+06	5.81167e+06	154734	1.34493e+06
Heterogeneous nuclear ribonucleoprotein U OS=Mus musculus GN=Hnrnpu PE=1 SV=1	KAVVVCPK		6117300			975031	3406140				6.1173e+06			2.69102e+06	1.59881e+06			3.27798e+06	6.1173e+06	1.01739e+07	7.72712e+06	2.69102e+06	1.59881e+06	2.77791e+06	2.01621e+06
Heterogeneous nuclear ribonucleoprotein U OS=Mus musculus GN=Hnrnpu PE=1 SV=1	KAVVVCPKDEDYKQR		4579150		1334340		2688850				4579151		5.31045e+06		1.26212e+06			6.36229e+06	4579151	720095	5.31045e+06	896690	1.26212e+06	744419	545666
Heterogeneous nuclear ribonucleoprotein U OS=Mus musculus GN=Hnrnpu PE=1 SV=1	KLKVSELKEELK		2700990								2.70099e+06							2.81432e+07	2.70099e+06	5.5062e+06	2.91427e+06
Heterogeneous nuclear ribonucleoprotein U OS=Mus musculus GN=Hnrnpu PE=1 SV=1	KMCLFAGFQR		900604								900605							1.11838e+06	900605	2.25426e+06	508385
Heterogeneous nuclear ribonucleoprotein U OS=Mus musculus GN=Hnrnpu PE=1 SV=1	KRNFILDQTNVSAAAQR		748806				364782				748807				171226			1.38006e+06	748807	84785.5	2.62662e+06	41040.1	171226	68104.7	245255
Heterogeneous nuclear ribonucleoprotein U OS=Mus musculus GN=Hnrnpu PE=1 SV=1	LKVSELKEELK		2020890								2.02089e+06							3.54461e+06	2.02089e+06	2.10531e+06	3.13158e+06
Heterogeneous nuclear ribonucleoprotein U OS=Mus musculus GN=Hnrnpu PE=1 SV=1	LKVSELKEELKK		2656580								2.65658e+06							2.08347e+06	2.65658e+06	460327	3.18406e+06
Heterogeneous nuclear ribonucleoprotein U OS=Mus musculus GN=Hnrnpu PE=1 SV=1	LLEQYKEESK	1013370					5295740			5.2644e+06					2.48577e+06			5.2644e+06	1.00055e+07	6.34188e+06	2.70166e+06	6.94906e+06	2.48577e+06	1.63689e+06	6.66953e+06
Heterogeneous nuclear ribonucleoprotein U OS=Mus musculus GN=Hnrnpu PE=1 SV=1	LNTLLQR	1913570								9.94088e+06								9.94088e+06	3.6065e+06	1.10203e+07	8.56415e+06
Heterogeneous nuclear ribonucleoprotein U OS=Mus musculus GN=Hnrnpu PE=1 SV=1	LQAALDNEAGGRPAMEPGNGSLDLGGDAAGR		506643								506644							776406	506644	1.04812e+06	248913
Heterogeneous nuclear ribonucleoprotein U OS=Mus musculus GN=Hnrnpu PE=1 SV=1	LSDKGLK								3764610								7.03445e+06					5.5136e+06	1.90032e+07	6.26683e+06	7.03445e+06
Heterogeneous nuclear ribonucleoprotein U OS=Mus musculus GN=Hnrnpu PE=1 SV=1	MCLFAGFQR		851621				747532				851622				350885			372499	851622	404714	350556	1.20698e+06	350885	74507.2	851350
Heterogeneous nuclear ribonucleoprotein U OS=Mus musculus GN=Hnrnpu PE=1 SV=1	MMVAGFKK						2866650								1.34558e+06							8.07028e+06	1.34558e+06	1.51812e+06	813652
Heterogeneous nuclear ribonucleoprotein U OS=Mus musculus GN=Hnrnpu PE=1 SV=1	NFILDQTNVSAAAQR	3461852	65533556	4770696	1050470	7.22713e+06	62829490	8109380	2221700	1.79841e+07	6.55336e+07	1.14907e+06	4.1807e+06	1.99464e+07	2.94916e+07	1.65158e+06	4.15141e+06	1.79841e+07	6.55336e+07	1.14907e+06	4.1807e+06	1.99464e+07	2.94916e+07	1.65158e+06	4.15141e+06
Heterogeneous nuclear ribonucleoprotein U OS=Mus musculus GN=Hnrnpu PE=1 SV=1	NGQDLGVAFK	388522				303039				2.01835e+06				836368				2.01835e+06	441336	2.83071e+06	1.11837e+07	836368	1.04633e+06	2.74601e+06	371915
Heterogeneous nuclear ribonucleoprotein U OS=Mus musculus GN=Hnrnpu PE=1 SV=1	QGQQQAGGDGKTEQK			203542		661119						49025.2		1.82464e+06				55675.1	30603.4	49025.2	338515	1.82464e+06	3.36496e+06	3.33078e+06	1.45105e+06
Heterogeneous nuclear ribonucleoprotein U OS=Mus musculus GN=Hnrnpu PE=1 SV=1	QMADTGKLNTLLQR		21556565		525697		11998083				2.15566e+07		2.09219e+06		5.6318e+06			5.74374e+06	2.15566e+07	2.95801e+06	2.09219e+06	2.25969e+06	5.6318e+06	5.35787e+06	7.3814e+06
Heterogeneous nuclear ribonucleoprotein U OS=Mus musculus GN=Hnrnpu PE=1 SV=1	RLSDKGLK		8791800								8.7918e+06							1.51802e+07	8.7918e+06	5.59048e+06	1.51011e+07
Heterogeneous nuclear ribonucleoprotein U OS=Mus musculus GN=Hnrnpu PE=1 SV=1	RNFILDQTNVSAAAQR						978348								459229							256002	459229	169212	324303
Heterogeneous nuclear ribonucleoprotein U OS=Mus musculus GN=Hnrnpu PE=1 SV=1	SGKNQFNR		4137200		1051070		5272289				4.1372e+06		4.18309e+06		2.47477e+06			8.78796e+06	4.1372e+06	2.47549e+06	4.18309e+06	1.86042e+06	2.47477e+06	1.63441e+06	1.186e+06
Heterogeneous nuclear ribonucleoprotein U OS=Mus musculus GN=Hnrnpu PE=1 SV=1	SSGPTSLFAVTVAPPGAR	4181450	25292300	2130850	48902700	11691500	30912600	4529690	25760440	2.17224e+07	2.52923e+07	513235	1.94625e+08	3.22677e+07	1.45101e+07	922529	4.81353e+07	2.17224e+07	2.52923e+07	513235	1.94625e+08	3.22677e+07	1.45101e+07	922529	4.81353e+07
Heterogeneous nuclear ribonucleoprotein U OS=Mus musculus GN=Hnrnpu PE=1 SV=1	SSSPVNVK		8709460			1538750					8.70946e+06			4.24684e+06				1.10052e+07	8.70946e+06	3.66863e+07	1.03524e+07	4.24684e+06	7.91752e+06	3.10929e+06	1.52381e+06
Heterogeneous nuclear ribonucleoprotein U OS=Mus musculus GN=Hnrnpu PE=1 SV=1	SSSPVNVKK	1865560								9.69147e+06								9.69147e+06	1.65031e+06	1.51948e+07	6.59554e+06
Heterogeneous nuclear ribonucleoprotein U OS=Mus musculus GN=Hnrnpu PE=1 SV=1	TQKKAEVEGK					320761								885280								885280	490972	814524	600695
Heterogeneous nuclear ribonucleoprotein U OS=Mus musculus GN=Hnrnpu PE=1 SV=1	TQKKAEVEGKDLPEHAVLK		4721930				1218780				4.72193e+06				572085			3.50483e+06	4.72193e+06	2.26077e+06	7.07524e+06	992446	572085	421370	3.72784e+06
Heterogeneous nuclear ribonucleoprotein U OS=Mus musculus GN=Hnrnpu PE=1 SV=1	VRGPKGPEEK				1833660								7.29766e+06					6.48087e+06	7.04079e+07	4.1648e+06	7.29766e+06
Heterogeneous nuclear ribonucleoprotein U OS=Mus musculus GN=Hnrnpu PE=1 SV=1	VSELKEELK		3103780								3.10378e+06							1.84636e+06	3.10378e+06	1.45405e+06	3.31584e+06
Heterogeneous nuclear ribonucleoprotein U OS=Mus musculus GN=Hnrnpu PE=1 SV=1	VSELKEELKK		1046690								1046691							1.11447e+06	1046691	210032	1.71167e+06
Heterogeneous nuclear ribonucleoprotein U OS=Mus musculus GN=Hnrnpu PE=1 SV=1	VSELKEELKKR		5520040								5.52004e+06							6.02319e+06	5.52004e+06	2.79839e+06	4.95688e+06
Heterogeneous nuclear ribonucleoprotein U OS=Mus musculus GN=Hnrnpu PE=1 SV=1	VTEKIPVR		11884183		21124150	852618	18775710		14862050		11884184		8.40706e+07	2.35317e+06	8.81316e+06		2.77708e+07	1.39104e+07	11884184	5.40802e+07	8.40706e+07	2.35317e+06	8.81316e+06	4.17992e+06	2.77708e+07
[truncated: 3,038 more rows]
