# Supplementary material for: A novel SATB1 protein isoform with different biophysical properties
Source: Front Cell Dev Biol. 2023 Aug 11;11:1242481. doi: 10.3389/fcell.2023.1242481 (PMC10457122; doi:10.3389/fcell.2023.1242481)
Supplement: Supplementary file 6 [file DataSheet2.xlsx]

## Sheet: GO-BP
source	term_name	term_id	adjusted_p_value	negative_log10_of_adjusted_p_value	term_size	query_size	intersection_size	effective_domain_size	intersections
GO:BP	chromatin organization	GO:0006325	1.20935e-27	26.9174	785	196	53	21118	SNW1,SPTY2D1,RBL2,NELFA,SATB1,MEN1,CREBBP,KANSL1,TAF1,MCRS1,HCFC2,KANSL3,EP300,SETD1A,CTBP1,KMT2A,SIN3A,HIRA,ATRX,TAF6,VPS72,PAXIP1,CHD4,EMSY,KANSL2,RBBP5,EPC2,EP400,SATB2,TAF9,CXXC1,BRD4,DMAP1,ASH2L,PRDM2,WDR5,KDM5A,MTA1,MTA2,PARK7,SFPQ,MKI67,LMNA,HP1BP3,MORC2A,BAP1,CDK9,HDAC1,TRIP12,HIST2H2BB,SMCHD1,HDAC7,SMARCA5
GO:BP	chromosome organization	GO:0051276	4.7086e-26	25.3271	1182	196	61	21118	SNW1,SPTY2D1,RBL2,NELFA,SATB1,MEN1,CREBBP,KANSL1,TAF1,MCRS1,HCFC2,KANSL3,EP300,SETD1A,CTBP1,KMT2A,SIN3A,HIRA,ATRX,TAF6,VPS72,PAXIP1,CHD4,EMSY,KANSL2,RBBP5,EPC2,EP400,SATB2,TAF9,CXXC1,BRD4,DMAP1,ASH2L,PRDM2,WDR5,KDM5A,MTA1,MTA2,PARK7,ACIN1,SFPQ,MKI67,LMNA,NUMA1,NUSAP1,KIFC1,HP1BP3,MORC2A,KPNB1,G3BP1,PPP2R1A,BAP1,CDK9,HDAC1,TRIP12,HIST2H2BB,SMCHD1,HDAC7,SMARCA5,ANXA1
GO:BP	covalent chromatin modification	GO:0016569	2.29536e-23	22.6391	480	196	40	21118	SNW1,NELFA,SATB1,MEN1,CREBBP,KANSL1,TAF1,MCRS1,KANSL3,EP300,SETD1A,CTBP1,KMT2A,SIN3A,ATRX,TAF6,PAXIP1,KANSL2,RBBP5,EPC2,EP400,TAF9,CXXC1,BRD4,DMAP1,ASH2L,PRDM2,WDR5,KDM5A,MTA1,MTA2,PARK7,SFPQ,LMNA,MORC2A,BAP1,CDK9,HDAC1,TRIP12,HDAC7
GO:BP	histone modification	GO:0016570	9.82564e-23	22.0076	467	196	39	21118	SNW1,NELFA,SATB1,MEN1,CREBBP,KANSL1,TAF1,MCRS1,KANSL3,EP300,SETD1A,CTBP1,KMT2A,SIN3A,ATRX,TAF6,PAXIP1,KANSL2,RBBP5,EPC2,EP400,TAF9,CXXC1,BRD4,DMAP1,ASH2L,PRDM2,WDR5,KDM5A,MTA1,MTA2,PARK7,SFPQ,LMNA,BAP1,CDK9,HDAC1,TRIP12,HDAC7
GO:BP	organelle organization	GO:0006996	5.47522e-22	21.2616	3798	196	99	21118	SNW1,SPTY2D1,ATXN2L,RBL2,NELFA,SATB1,MEN1,CREBBP,KANSL1,TAF1,MCRS1,HCFC2,KANSL3,EP300,SETD1A,CTBP1,KMT2A,SIN3A,HIRA,ATRX,TAF6,VPS72,PAXIP1,CHD4,EMSY,KANSL2,RBBP5,EPC2,EP400,SATB2,TAF9,CXXC1,BRD4,DMAP1,ASH2L,PRDM2,WDR5,KDM5A,MTA1,MTA2,PARK7,ACIN1,SFPQ,SUN2,MKI67,VIM,LMNA,TUBGCP6,TPX2,KIFC5B,NUMA1,TUBGCP3,KIF20B,TUBGCP2,TMED9,NUSAP1,KIFC1,SFN,HP1BP3,AGAP2,MORC2A,SPAST,KPNB1,PKP1,G3BP1,NUP205,NUP153…
GO:BP	gene expression	GO:0010467	5.53517e-19	18.2569	5933	196	120	21118	HNRNPK,CDC5L,PSPC1,PABPN1,RALY,NONO,SNW1,ZNF48,CGGBP1,POLR2B,SP2,SPTY2D1,SLTM,JUP,WIZ,SKAP1,RBL2,NELFA,TAF5,CCNT1,MYBBP1A,SATB1,MED12,MEN1,CREBBP,TAF1,MCRS1,HCFC2,KANSL3,EP300,SETD1A,CTBP1,KMT2A,SIN3A,HIRA,ATRX,TAF6,VPS72,PAXIP1,CHD4,MED23,SMARCAL1,EMSY,EPC2,DIDO1,SATB2,TAF9,MED4,CXXC1,BRD4,DMAP1,KLF13,ASH2L,PRDM2,KDM5A,MTA1,MTA2,ADNP,PRDX4,PARK7,CRNKL1,WBP11,PABPC1,RBM26,ALKBH5,INTS8,ZC3H11A,SRS…
GO:BP	cellular nitrogen compound metabolic process	GO:0034641	7.86275e-18	17.1044	6201	196	121	21118	HNRNPK,CDC5L,PSPC1,PABPN1,RALY,NONO,SNW1,ZNF48,CGGBP1,POLR2B,SP2,SPTY2D1,SLTM,JUP,WIZ,SKAP1,NFRKB,RBL2,NELFA,TAF5,CCNT1,MYBBP1A,SATB1,MED12,MEN1,CREBBP,TAF1,MCRS1,HCFC2,KANSL3,EP300,SETD1A,CTBP1,KMT2A,SIN3A,HIRA,ATRX,TAF6,VPS72,PAXIP1,CHD4,MED23,SMARCAL1,EMSY,EPC2,DIDO1,SATB2,TAF9,MED4,CXXC1,BRD4,DMAP1,KLF13,ASH2L,PRDM2,KDM5A,MTA1,MTA2,PARK7,CRNKL1,WBP11,PABPC1,RBM26,ALKBH5,INTS8,SRSF5,NCL,AQR,ZC…
GO:BP	cellular component organization or biogenesis	GO:0071840	2.15608e-17	16.6663	6270	196	121	21118	HNRNPK,SNW1,SPTY2D1,JUP,ATXN2L,SKAP1,RBL2,NELFA,MYBBP1A,SATB1,MEN1,CREBBP,KANSL1,TAF1,MCRS1,HCFC2,KANSL3,EP300,SETD1A,CTBP1,KMT2A,SIN3A,HIRA,ATRX,TAF6,VPS72,PAXIP1,CHD4,EMSY,KANSL2,RBBP5,EPC2,EP400,SATB2,TAF9,CXXC1,BRD4,DMAP1,ASH2L,PRDM2,WDR5,KDM5A,MTA1,MTA2,ADNP,PRDX4,PARK7,CRNKL1,WBP11,NCL,ACIN1,SFPQ,SUN2,MKI67,VIM,LMNA,TUBGCP6,TPX2,KIFC5B,NUMA1,TUBGCP3,KIF20B,TUBGCP2,TMED9,NUSAP1,KIFC1,SFN,HP1…
GO:BP	RNA metabolic process	GO:0016070	1.52247e-16	15.8175	4470	196	99	21118	HNRNPK,CDC5L,PSPC1,PABPN1,RALY,NONO,SNW1,ZNF48,CGGBP1,POLR2B,SP2,SPTY2D1,SLTM,JUP,WIZ,SKAP1,RBL2,NELFA,TAF5,CCNT1,MYBBP1A,SATB1,MED12,MEN1,CREBBP,TAF1,MCRS1,HCFC2,KANSL3,EP300,SETD1A,CTBP1,KMT2A,SIN3A,HIRA,ATRX,TAF6,VPS72,PAXIP1,CHD4,MED23,SMARCAL1,EMSY,EPC2,DIDO1,SATB2,TAF9,MED4,CXXC1,BRD4,DMAP1,KLF13,ASH2L,PRDM2,KDM5A,MTA1,MTA2,PARK7,CRNKL1,WBP11,PABPC1,RBM26,ALKBH5,INTS8,SRSF5,NCL,AQR,ZC3H13,Z…
GO:BP	nucleic acid metabolic process	GO:0090304	5.09743e-16	15.2926	4962	196	104	21118	HNRNPK,CDC5L,PSPC1,PABPN1,RALY,NONO,SNW1,ZNF48,CGGBP1,POLR2B,SP2,SPTY2D1,SLTM,JUP,WIZ,SKAP1,NFRKB,RBL2,NELFA,TAF5,CCNT1,MYBBP1A,SATB1,MED12,MEN1,CREBBP,TAF1,MCRS1,HCFC2,KANSL3,EP300,SETD1A,CTBP1,KMT2A,SIN3A,HIRA,ATRX,TAF6,VPS72,PAXIP1,CHD4,MED23,SMARCAL1,EMSY,EPC2,DIDO1,SATB2,TAF9,MED4,CXXC1,BRD4,DMAP1,KLF13,ASH2L,PRDM2,KDM5A,MTA1,MTA2,PARK7,CRNKL1,WBP11,PABPC1,RBM26,ALKBH5,INTS8,SRSF5,NCL,AQR,ZC…
GO:BP	peptidyl-lysine modification	GO:0018205	4.78846e-15	14.3198	382	196	29	21118	SNW1,NELFA,MEN1,CREBBP,KANSL1,TAF1,MCRS1,KANSL3,EP300,SETD1A,CTBP1,KMT2A,SIN3A,ATRX,TAF6,PAXIP1,KANSL2,RBBP5,EPC2,EP400,TAF9,CXXC1,BRD4,DMAP1,ASH2L,WDR5,PARK7,LMNA,HDAC1
GO:BP	cellular component organization	GO:0016043	1.61411e-14	13.7921	6090	196	114	21118	HNRNPK,SNW1,SPTY2D1,JUP,ATXN2L,SKAP1,RBL2,NELFA,SATB1,MEN1,CREBBP,KANSL1,TAF1,MCRS1,HCFC2,KANSL3,EP300,SETD1A,CTBP1,KMT2A,SIN3A,HIRA,ATRX,TAF6,VPS72,PAXIP1,CHD4,EMSY,KANSL2,RBBP5,EPC2,EP400,SATB2,TAF9,CXXC1,BRD4,DMAP1,ASH2L,PRDM2,WDR5,KDM5A,MTA1,MTA2,ADNP,PRDX4,PARK7,CRNKL1,ACIN1,SFPQ,SUN2,MKI67,VIM,LMNA,TUBGCP6,TPX2,KIFC5B,NUMA1,TUBGCP3,KIF20B,TUBGCP2,TMED9,NUSAP1,KIFC1,SFN,HP1BP3,AGAP2,EIF4G2,M…
GO:BP	nucleobase-containing compound metabolic process	GO:0006139	3.24791e-14	13.4884	5416	196	106	21118	HNRNPK,CDC5L,PSPC1,PABPN1,RALY,NONO,SNW1,ZNF48,CGGBP1,POLR2B,SP2,SPTY2D1,SLTM,JUP,WIZ,SKAP1,NFRKB,RBL2,NELFA,TAF5,CCNT1,MYBBP1A,SATB1,MED12,MEN1,CREBBP,TAF1,MCRS1,HCFC2,KANSL3,EP300,SETD1A,CTBP1,KMT2A,SIN3A,HIRA,ATRX,TAF6,VPS72,PAXIP1,CHD4,MED23,SMARCAL1,EMSY,EPC2,DIDO1,SATB2,TAF9,MED4,CXXC1,BRD4,DMAP1,KLF13,ASH2L,PRDM2,KDM5A,MTA1,MTA2,PARK7,CRNKL1,WBP11,PABPC1,RBM26,ALKBH5,INTS8,SRSF5,NCL,AQR,ZC…
GO:BP	macromolecule metabolic process	GO:0043170	5.38023e-14	13.2692	9484	196	146	21118	HNRNPK,CDC5L,PSPC1,PABPN1,RALY,NONO,SNW1,ZNF48,CGGBP1,POLR2B,SP2,SPTY2D1,SLTM,JUP,WIZ,SKAP1,NFRKB,RBL2,NELFA,TAF5,CCNT1,MYBBP1A,SATB1,MED12,MEN1,CREBBP,KANSL1,TAF1,MCRS1,HCFC2,KANSL3,EP300,SETD1A,CTBP1,KMT2A,SIN3A,HIRA,ATRX,TAF6,VPS72,PAXIP1,CHD4,MED23,SMARCAL1,EMSY,KANSL2,RBBP5,EPC2,DIDO1,EP400,SATB2,TAF9,MED4,CXXC1,BRD4,DMAP1,KLF13,ASH2L,PRDM2,WDR5,KDM5A,MTA1,MTA2,ADNP,PRDX4,PARK7,CRNKL1,WBP11,…
GO:BP	cellular metabolic process	GO:0044237	8.74616e-14	13.0582	10350	196	153	21118	HNRNPK,CDC5L,PSPC1,PABPN1,RALY,NONO,SNW1,ZNF48,CGGBP1,POLR2B,SP2,SPTY2D1,SLTM,JUP,WIZ,SKAP1,NFRKB,RBL2,NELFA,TAF5,CCNT1,MYBBP1A,SATB1,MED12,MEN1,CREBBP,KANSL1,TAF1,MCRS1,HCFC2,KANSL3,EP300,SETD1A,CTBP1,KMT2A,SIN3A,HIRA,ATRX,TAF6,VPS72,PAXIP1,CHD4,MED23,SMARCAL1,EMSY,KANSL2,RBBP5,EPC2,DIDO1,EP400,SATB2,TAF9,MED4,CXXC1,BRD4,DMAP1,KLF13,ASH2L,PRDM2,WDR5,KDM5A,MTA1,MTA2,ADNP,PRDX4,PARK7,PRDX1,CRNKL1,…
GO:BP	heterocycle metabolic process	GO:0046483	1.69369e-13	12.7712	5535	196	106	21118	HNRNPK,CDC5L,PSPC1,PABPN1,RALY,NONO,SNW1,ZNF48,CGGBP1,POLR2B,SP2,SPTY2D1,SLTM,JUP,WIZ,SKAP1,NFRKB,RBL2,NELFA,TAF5,CCNT1,MYBBP1A,SATB1,MED12,MEN1,CREBBP,TAF1,MCRS1,HCFC2,KANSL3,EP300,SETD1A,CTBP1,KMT2A,SIN3A,HIRA,ATRX,TAF6,VPS72,PAXIP1,CHD4,MED23,SMARCAL1,EMSY,EPC2,DIDO1,SATB2,TAF9,MED4,CXXC1,BRD4,DMAP1,KLF13,ASH2L,PRDM2,KDM5A,MTA1,MTA2,PARK7,CRNKL1,WBP11,PABPC1,RBM26,ALKBH5,INTS8,SRSF5,NCL,AQR,ZC…
GO:BP	nitrogen compound metabolic process	GO:0006807	4.18927e-13	12.3779	9669	196	146	21118	HNRNPK,CDC5L,PSPC1,PABPN1,RALY,NONO,SNW1,ZNF48,CGGBP1,POLR2B,SP2,SPTY2D1,SLTM,JUP,WIZ,SKAP1,NFRKB,RBL2,NELFA,TAF5,CCNT1,MYBBP1A,SATB1,MED12,MEN1,CREBBP,KANSL1,TAF1,MCRS1,HCFC2,KANSL3,EP300,SETD1A,CTBP1,KMT2A,SIN3A,HIRA,ATRX,TAF6,VPS72,PAXIP1,CHD4,MED23,SMARCAL1,EMSY,KANSL2,RBBP5,EPC2,DIDO1,EP400,SATB2,TAF9,MED4,CXXC1,BRD4,DMAP1,KLF13,ASH2L,PRDM2,WDR5,KDM5A,MTA1,MTA2,ADNP,PRDX4,PARK7,CRNKL1,WBP11,…
GO:BP	cellular aromatic compound metabolic process	GO:0006725	5.18697e-13	12.2851	5618	196	106	21118	HNRNPK,CDC5L,PSPC1,PABPN1,RALY,NONO,SNW1,ZNF48,CGGBP1,POLR2B,SP2,SPTY2D1,SLTM,JUP,WIZ,SKAP1,NFRKB,RBL2,NELFA,TAF5,CCNT1,MYBBP1A,SATB1,MED12,MEN1,CREBBP,TAF1,MCRS1,HCFC2,KANSL3,EP300,SETD1A,CTBP1,KMT2A,SIN3A,HIRA,ATRX,TAF6,VPS72,PAXIP1,CHD4,MED23,SMARCAL1,EMSY,EPC2,DIDO1,SATB2,TAF9,MED4,CXXC1,BRD4,DMAP1,KLF13,ASH2L,PRDM2,KDM5A,MTA1,MTA2,PARK7,CRNKL1,WBP11,PABPC1,RBM26,ALKBH5,INTS8,SRSF5,NCL,AQR,ZC…
GO:BP	peptidyl-lysine acetylation	GO:0018394	6.26009e-13	12.2034	178	196	20	21118	CREBBP,KANSL1,TAF1,MCRS1,KANSL3,EP300,CTBP1,KMT2A,SIN3A,TAF6,PAXIP1,KANSL2,EPC2,EP400,TAF9,BRD4,DMAP1,WDR5,PARK7,HDAC1
GO:BP	cellular nitrogen compound biosynthetic process	GO:0044271	9.85707e-13	12.0063	4705	196	95	21118	HNRNPK,CDC5L,PSPC1,RALY,NONO,SNW1,ZNF48,CGGBP1,POLR2B,SP2,SPTY2D1,SLTM,JUP,WIZ,SKAP1,RBL2,NELFA,TAF5,CCNT1,MYBBP1A,SATB1,MED12,MEN1,CREBBP,TAF1,MCRS1,HCFC2,KANSL3,EP300,SETD1A,CTBP1,KMT2A,SIN3A,HIRA,ATRX,TAF6,VPS72,PAXIP1,CHD4,MED23,SMARCAL1,EMSY,EPC2,DIDO1,SATB2,TAF9,MED4,CXXC1,BRD4,DMAP1,KLF13,ASH2L,PRDM2,KDM5A,MTA1,MTA2,PARK7,PABPC1,NCL,RBM15,POLDIP3,SFPQ,TMPO,VIM,TCOF1,HP1BP3,AGAP2,EIF4G2,MOR…
GO:BP	histone acetylation	GO:0016573	1.25829e-12	11.9002	160	196	19	21118	CREBBP,KANSL1,TAF1,MCRS1,KANSL3,EP300,CTBP1,KMT2A,SIN3A,TAF6,PAXIP1,KANSL2,EPC2,EP400,TAF9,BRD4,DMAP1,WDR5,PARK7
GO:BP	cellular macromolecule metabolic process	GO:0044260	2.18263e-12	11.661	7962	196	129	21118	HNRNPK,CDC5L,PSPC1,NONO,SNW1,ZNF48,CGGBP1,POLR2B,SP2,SPTY2D1,SLTM,JUP,WIZ,SKAP1,NFRKB,RBL2,NELFA,TAF5,CCNT1,MYBBP1A,SATB1,MED12,MEN1,CREBBP,KANSL1,TAF1,MCRS1,HCFC2,KANSL3,EP300,SETD1A,CTBP1,KMT2A,SIN3A,HIRA,ATRX,TAF6,VPS72,PAXIP1,CHD4,MED23,SMARCAL1,EMSY,KANSL2,RBBP5,EPC2,DIDO1,EP400,SATB2,TAF9,MED4,CXXC1,BRD4,DMAP1,KLF13,ASH2L,PRDM2,WDR5,KDM5A,MTA1,MTA2,ADNP,PRDX4,PARK7,WBP11,PABPC1,ALKBH5,NCL,Z…
GO:BP	internal peptidyl-lysine acetylation	GO:0018393	2.51651e-12	11.5992	166	196	19	21118	CREBBP,KANSL1,TAF1,MCRS1,KANSL3,EP300,CTBP1,KMT2A,SIN3A,TAF6,PAXIP1,KANSL2,EPC2,EP400,TAF9,BRD4,DMAP1,WDR5,PARK7
GO:BP	internal protein amino acid acetylation	GO:0006475	2.51651e-12	11.5992	166	196	19	21118	CREBBP,KANSL1,TAF1,MCRS1,KANSL3,EP300,CTBP1,KMT2A,SIN3A,TAF6,PAXIP1,KANSL2,EPC2,EP400,TAF9,BRD4,DMAP1,WDR5,PARK7
GO:BP	macromolecule biosynthetic process	GO:0009059	2.93223e-12	11.5328	4782	196	95	21118	HNRNPK,CDC5L,PSPC1,RALY,NONO,SNW1,ZNF48,CGGBP1,POLR2B,SP2,SPTY2D1,SLTM,JUP,WIZ,SKAP1,RBL2,NELFA,TAF5,CCNT1,MYBBP1A,SATB1,MED12,MEN1,CREBBP,TAF1,MCRS1,HCFC2,KANSL3,EP300,SETD1A,CTBP1,KMT2A,SIN3A,HIRA,ATRX,TAF6,VPS72,PAXIP1,CHD4,MED23,SMARCAL1,EMSY,EPC2,DIDO1,SATB2,TAF9,MED4,CXXC1,BRD4,DMAP1,KLF13,ASH2L,PRDM2,KDM5A,MTA1,MTA2,PARK7,PABPC1,NCL,RBM15,POLDIP3,SFPQ,TMPO,VIM,MCM10,TCOF1,HP1BP3,AGAP2,EIF4…
GO:BP	primary metabolic process	GO:0044238	4.5658e-12	11.3405	10243	196	149	21118	HNRNPK,CDC5L,PSPC1,PABPN1,RALY,NONO,SNW1,ZNF48,CGGBP1,POLR2B,SP2,SPTY2D1,SLTM,JUP,WIZ,SKAP1,NFRKB,RBL2,NELFA,TAF5,CCNT1,MYBBP1A,SATB1,MED12,MEN1,CREBBP,KANSL1,TAF1,MCRS1,HCFC2,KANSL3,EP300,SETD1A,CTBP1,KMT2A,SIN3A,HIRA,ATRX,TAF6,VPS72,PAXIP1,CHD4,MED23,SMARCAL1,EMSY,KANSL2,RBBP5,EPC2,DIDO1,EP400,SATB2,TAF9,MED4,CXXC1,BRD4,DMAP1,KLF13,ASH2L,PRDM2,WDR5,KDM5A,MTA1,MTA2,ADNP,PRDX4,PARK7,CRNKL1,WBP11,…
GO:BP	cellular macromolecule biosynthetic process	GO:0034645	5.64926e-12	11.248	4744	196	94	21118	HNRNPK,CDC5L,PSPC1,NONO,SNW1,ZNF48,CGGBP1,POLR2B,SP2,SPTY2D1,SLTM,JUP,WIZ,SKAP1,RBL2,NELFA,TAF5,CCNT1,MYBBP1A,SATB1,MED12,MEN1,CREBBP,TAF1,MCRS1,HCFC2,KANSL3,EP300,SETD1A,CTBP1,KMT2A,SIN3A,HIRA,ATRX,TAF6,VPS72,PAXIP1,CHD4,MED23,SMARCAL1,EMSY,EPC2,DIDO1,SATB2,TAF9,MED4,CXXC1,BRD4,DMAP1,KLF13,ASH2L,PRDM2,KDM5A,MTA1,MTA2,PARK7,PABPC1,NCL,RBM15,POLDIP3,SFPQ,TMPO,VIM,MCM10,TCOF1,HP1BP3,AGAP2,EIF4G2,MO…
GO:BP	organic cyclic compound metabolic process	GO:1901360	7.95073e-12	11.0996	5829	196	106	21118	HNRNPK,CDC5L,PSPC1,PABPN1,RALY,NONO,SNW1,ZNF48,CGGBP1,POLR2B,SP2,SPTY2D1,SLTM,JUP,WIZ,SKAP1,NFRKB,RBL2,NELFA,TAF5,CCNT1,MYBBP1A,SATB1,MED12,MEN1,CREBBP,TAF1,MCRS1,HCFC2,KANSL3,EP300,SETD1A,CTBP1,KMT2A,SIN3A,HIRA,ATRX,TAF6,VPS72,PAXIP1,CHD4,MED23,SMARCAL1,EMSY,EPC2,DIDO1,SATB2,TAF9,MED4,CXXC1,BRD4,DMAP1,KLF13,ASH2L,PRDM2,KDM5A,MTA1,MTA2,PARK7,CRNKL1,WBP11,PABPC1,RBM26,ALKBH5,INTS8,SRSF5,NCL,AQR,ZC…
GO:BP	regulation of chromatin organization	GO:1902275	9.88282e-12	11.0051	205	196	20	21118	SNW1,SPTY2D1,NELFA,MEN1,EP300,SETD1A,CTBP1,KMT2A,SIN3A,ATRX,PAXIP1,BRD4,WDR5,KDM5A,PARK7,MKI67,LMNA,MORC2A,CDK9,TRIP12
GO:BP	protein acetylation	GO:0006473	1.08581e-11	10.9642	206	196	20	21118	CREBBP,KANSL1,TAF1,MCRS1,KANSL3,EP300,CTBP1,KMT2A,SIN3A,TAF6,PAXIP1,KANSL2,EPC2,EP400,TAF9,BRD4,DMAP1,WDR5,PARK7,HDAC1
GO:BP	organic substance metabolic process	GO:0071704	1.98791e-11	10.7016	10989	196	154	21118	HNRNPK,CDC5L,PSPC1,PABPN1,RALY,NONO,SNW1,ZNF48,CGGBP1,POLR2B,SP2,SPTY2D1,SLTM,JUP,WIZ,SKAP1,NFRKB,RBL2,NELFA,TAF5,CCNT1,MYBBP1A,SATB1,MED12,MEN1,CREBBP,KANSL1,TAF1,MCRS1,HCFC2,KANSL3,EP300,SETD1A,CTBP1,KMT2A,SIN3A,HIRA,ATRX,TAF6,VPS72,PAXIP1,CHD4,MED23,SMARCAL1,EMSY,KANSL2,RBBP5,EPC2,DIDO1,EP400,SATB2,TAF9,MED4,CXXC1,BRD4,DMAP1,KLF13,ASH2L,PRDM2,WDR5,KDM5A,MTA1,MTA2,ADNP,PRDX4,PARK7,CRNKL1,WBP11,…
GO:BP	regulation of RNA metabolic process	GO:0051252	2.14569e-11	10.6684	3691	196	80	21118	HNRNPK,CDC5L,PSPC1,RALY,NONO,SNW1,ZNF48,CGGBP1,SP2,SPTY2D1,SLTM,JUP,WIZ,SKAP1,RBL2,NELFA,CCNT1,MYBBP1A,SATB1,MED12,MEN1,CREBBP,TAF1,MCRS1,HCFC2,KANSL3,EP300,SETD1A,CTBP1,KMT2A,SIN3A,HIRA,ATRX,TAF6,VPS72,PAXIP1,CHD4,MED23,SMARCAL1,EMSY,EPC2,SATB2,TAF9,MED4,CXXC1,BRD4,DMAP1,KLF13,ASH2L,PRDM2,KDM5A,MTA1,MTA2,PARK7,PABPC1,ALKBH5,SRSF5,NCL,ZC3H18,ACIN1,RBM15,SFPQ,WTAP,TMPO,VIM,HP1BP3,AGAP2,MORC2A,PKP1…
GO:BP	metabolic process	GO:0008152	3.89248e-11	10.4098	11429	196	157	21118	HNRNPK,CDC5L,PSPC1,PABPN1,RALY,NONO,SNW1,ZNF48,CGGBP1,POLR2B,SP2,SPTY2D1,SLTM,JUP,WIZ,SKAP1,NFRKB,RBL2,NELFA,TAF5,CCNT1,MYBBP1A,SATB1,MED12,MEN1,CREBBP,KANSL1,TAF1,MCRS1,HCFC2,KANSL3,EP300,SETD1A,CTBP1,KMT2A,SIN3A,HIRA,ATRX,TAF6,VPS72,PAXIP1,CHD4,MED23,SMARCAL1,EMSY,KANSL2,RBBP5,EPC2,DIDO1,EP400,SATB2,TAF9,MED4,CXXC1,BRD4,DMAP1,KLF13,ASH2L,PRDM2,WDR5,KDM5A,MTA1,MTA2,ADNP,PRDX4,PARK7,PRDX1,CRNKL1,…
GO:BP	regulation of nucleobase-containing compound metabolic process	GO:0019219	7.21627e-11	10.1417	3931	196	82	21118	HNRNPK,CDC5L,PSPC1,RALY,NONO,SNW1,ZNF48,CGGBP1,SP2,SPTY2D1,SLTM,JUP,WIZ,SKAP1,RBL2,NELFA,CCNT1,MYBBP1A,SATB1,MED12,MEN1,CREBBP,TAF1,MCRS1,HCFC2,KANSL3,EP300,SETD1A,CTBP1,KMT2A,SIN3A,HIRA,ATRX,TAF6,VPS72,PAXIP1,CHD4,MED23,SMARCAL1,EMSY,EPC2,SATB2,TAF9,MED4,CXXC1,BRD4,DMAP1,KLF13,ASH2L,PRDM2,KDM5A,MTA1,MTA2,PARK7,PABPC1,ALKBH5,SRSF5,NCL,ZC3H18,ACIN1,RBM15,SFPQ,WTAP,TMPO,VIM,LMNA,HP1BP3,AGAP2,MORC2A…
GO:BP	regulation of nitrogen compound metabolic process	GO:0051171	1.56281e-10	9.80609	5706	196	102	21118	HNRNPK,CDC5L,PSPC1,RALY,NONO,SNW1,ZNF48,CGGBP1,SP2,SPTY2D1,SLTM,JUP,WIZ,SKAP1,RBL2,NELFA,CCNT1,MYBBP1A,SATB1,MED12,MEN1,CREBBP,TAF1,MCRS1,HCFC2,KANSL3,EP300,SETD1A,CTBP1,KMT2A,SIN3A,HIRA,ATRX,TAF6,VPS72,PAXIP1,CHD4,MED23,SMARCAL1,EMSY,EPC2,SATB2,TAF9,MED4,CXXC1,BRD4,DMAP1,KLF13,ASH2L,PRDM2,WDR5,KDM5A,MTA1,MTA2,ADNP,PARK7,WBP11,PABPC1,ALKBH5,SRSF5,NCL,ZC3H18,ACIN1,RBM15,POLDIP3,SFPQ,WTAP,TMPO,VIM,…
GO:BP	nucleic acid-templated transcription	GO:0097659	2.30498e-10	9.63733	3534	196	76	21118	HNRNPK,CDC5L,PSPC1,RALY,NONO,SNW1,ZNF48,CGGBP1,POLR2B,SP2,SPTY2D1,SLTM,JUP,WIZ,SKAP1,RBL2,NELFA,TAF5,CCNT1,MYBBP1A,SATB1,MED12,MEN1,CREBBP,TAF1,MCRS1,HCFC2,KANSL3,EP300,SETD1A,CTBP1,KMT2A,SIN3A,HIRA,ATRX,TAF6,VPS72,PAXIP1,CHD4,MED23,SMARCAL1,EMSY,EPC2,DIDO1,SATB2,TAF9,MED4,CXXC1,BRD4,DMAP1,KLF13,ASH2L,PRDM2,KDM5A,MTA1,MTA2,PARK7,NCL,RBM15,SFPQ,TMPO,TCOF1,HP1BP3,AGAP2,MORC2A,ACTN1,WASL,RPL23,BAP1,…
GO:BP	positive regulation of biological process	GO:0048518	2.56807e-10	9.59039	6305	196	108	21118	HNRNPK,CDC5L,PSPC1,NONO,SNW1,ZNF48,JUP,WIZ,SKAP1,NELFA,CCNT1,MYBBP1A,MED12,MEN1,CREBBP,TAF1,MCRS1,HCFC2,KANSL3,EP300,SETD1A,CTBP1,KMT2A,SIN3A,ATRX,TAF6,PAXIP1,SATB2,TAF9,MED4,CXXC1,BRD4,DMAP1,KLF13,ASH2L,PRDM2,WDR5,KDM5A,MTA1,MTA2,ADNP,PARK7,PABPC1,SRSF5,NCL,ZC3H18,ACIN1,RBM15,POLDIP3,SFPQ,SUN2,ALDH3A1,VIM,ANXA5,LMNA,TPX2,NUMA1,KPNA2,KIF20B,TMED9,NUSAP1,SFN,AGAP2,EIF4G2,MORC2A,RPUSD4,SPAST,PKP1,G…
GO:BP	RNA biosynthetic process	GO:0032774	2.88618e-10	9.53968	3549	196	76	21118	HNRNPK,CDC5L,PSPC1,RALY,NONO,SNW1,ZNF48,CGGBP1,POLR2B,SP2,SPTY2D1,SLTM,JUP,WIZ,SKAP1,RBL2,NELFA,TAF5,CCNT1,MYBBP1A,SATB1,MED12,MEN1,CREBBP,TAF1,MCRS1,HCFC2,KANSL3,EP300,SETD1A,CTBP1,KMT2A,SIN3A,HIRA,ATRX,TAF6,VPS72,PAXIP1,CHD4,MED23,SMARCAL1,EMSY,EPC2,DIDO1,SATB2,TAF9,MED4,CXXC1,BRD4,DMAP1,KLF13,ASH2L,PRDM2,KDM5A,MTA1,MTA2,PARK7,NCL,RBM15,SFPQ,TMPO,TCOF1,HP1BP3,AGAP2,MORC2A,ACTN1,WASL,RPL23,BAP1,…
GO:BP	protein acylation	GO:0043543	3.46876e-10	9.45983	247	196	20	21118	CREBBP,KANSL1,TAF1,MCRS1,KANSL3,EP300,CTBP1,KMT2A,SIN3A,TAF6,PAXIP1,KANSL2,EPC2,EP400,TAF9,BRD4,DMAP1,WDR5,PARK7,HDAC1
GO:BP	regulation of gene expression	GO:0010468	3.74426e-10	9.42663	4888	196	92	21118	HNRNPK,CDC5L,PSPC1,NONO,SNW1,ZNF48,CGGBP1,SP2,SPTY2D1,SLTM,JUP,WIZ,SKAP1,RBL2,NELFA,CCNT1,MYBBP1A,SATB1,MED12,MEN1,CREBBP,TAF1,MCRS1,HCFC2,KANSL3,EP300,SETD1A,CTBP1,KMT2A,SIN3A,HIRA,ATRX,TAF6,VPS72,PAXIP1,CHD4,MED23,SMARCAL1,EMSY,EPC2,SATB2,TAF9,MED4,CXXC1,BRD4,DMAP1,KLF13,ASH2L,PRDM2,KDM5A,MTA1,MTA2,ADNP,PARK7,PABPC1,ALKBH5,SRSF5,NCL,ZC3H18,ACIN1,RBM15,POLDIP3,SFPQ,WTAP,TMPO,VIM,LMNA,TCOF1,HP1BP…
GO:BP	regulation of primary metabolic process	GO:0080090	4.4477e-10	9.35186	5886	196	103	21118	HNRNPK,CDC5L,PSPC1,RALY,NONO,SNW1,ZNF48,CGGBP1,SP2,SPTY2D1,SLTM,JUP,WIZ,SKAP1,RBL2,NELFA,CCNT1,MYBBP1A,SATB1,MED12,MEN1,CREBBP,TAF1,MCRS1,HCFC2,KANSL3,EP300,SETD1A,CTBP1,KMT2A,SIN3A,HIRA,ATRX,TAF6,VPS72,PAXIP1,CHD4,MED23,SMARCAL1,EMSY,EPC2,SATB2,TAF9,MED4,CXXC1,BRD4,DMAP1,KLF13,ASH2L,PRDM2,WDR5,KDM5A,MTA1,MTA2,ADNP,PARK7,WBP11,PABPC1,ALKBH5,SRSF5,NCL,ZC3H18,ACIN1,RBM15,POLDIP3,SFPQ,WTAP,TMPO,VIM,…
GO:BP	regulation of cellular metabolic process	GO:0031323	4.52798e-10	9.3441	6073	196	105	21118	HNRNPK,CDC5L,PSPC1,RALY,NONO,SNW1,ZNF48,CGGBP1,SP2,SPTY2D1,SLTM,JUP,WIZ,SKAP1,RBL2,NELFA,CCNT1,MYBBP1A,SATB1,MED12,MEN1,CREBBP,TAF1,MCRS1,HCFC2,KANSL3,EP300,SETD1A,CTBP1,KMT2A,SIN3A,HIRA,ATRX,TAF6,VPS72,PAXIP1,CHD4,MED23,SMARCAL1,EMSY,EPC2,SATB2,TAF9,MED4,CXXC1,BRD4,DMAP1,KLF13,ASH2L,PRDM2,WDR5,KDM5A,MTA1,MTA2,ADNP,PARK7,WBP11,PABPC1,RBM26,ALKBH5,SRSF5,NCL,ZC3H18,ACIN1,RBM15,POLDIP3,SFPQ,WTAP,TMP…
GO:BP	cellular biosynthetic process	GO:0044249	5.15081e-10	9.28812	5715	196	101	21118	HNRNPK,CDC5L,PSPC1,RALY,NONO,SNW1,ZNF48,CGGBP1,POLR2B,SP2,SPTY2D1,SLTM,JUP,WIZ,SKAP1,RBL2,NELFA,TAF5,CCNT1,MYBBP1A,SATB1,MED12,MEN1,CREBBP,TAF1,MCRS1,HCFC2,KANSL3,EP300,SETD1A,CTBP1,KMT2A,SIN3A,HIRA,ATRX,TAF6,VPS72,PAXIP1,CHD4,MED23,SMARCAL1,EMSY,EPC2,DIDO1,SATB2,TAF9,MED4,CXXC1,BRD4,DMAP1,KLF13,ASH2L,PRDM2,WDR5,KDM5A,MTA1,MTA2,PARK7,PABPC1,NCL,RBM15,POLDIP3,SFPQ,TMPO,VIM,MCM10,TCOF1,HP1BP3,AGAP2…
GO:BP	regulation of macromolecule biosynthetic process	GO:0010556	5.59726e-10	9.25202	3913	196	80	21118	HNRNPK,CDC5L,PSPC1,RALY,NONO,SNW1,ZNF48,CGGBP1,SP2,SPTY2D1,SLTM,JUP,WIZ,SKAP1,RBL2,NELFA,CCNT1,MYBBP1A,SATB1,MED12,MEN1,CREBBP,TAF1,MCRS1,HCFC2,KANSL3,EP300,SETD1A,CTBP1,KMT2A,SIN3A,HIRA,ATRX,TAF6,VPS72,PAXIP1,CHD4,MED23,SMARCAL1,EMSY,EPC2,SATB2,TAF9,MED4,CXXC1,BRD4,DMAP1,KLF13,ASH2L,PRDM2,KDM5A,MTA1,MTA2,PARK7,PABPC1,NCL,RBM15,POLDIP3,SFPQ,TMPO,VIM,TCOF1,HP1BP3,AGAP2,EIF4G2,MORC2A,RPUSD4,ACTN1,W…
GO:BP	regulation of cellular biosynthetic process	GO:0031326	6.62322e-10	9.17893	4088	196	82	21118	HNRNPK,CDC5L,PSPC1,RALY,NONO,SNW1,ZNF48,CGGBP1,SP2,SPTY2D1,SLTM,JUP,WIZ,SKAP1,RBL2,NELFA,CCNT1,MYBBP1A,SATB1,MED12,MEN1,CREBBP,TAF1,MCRS1,HCFC2,KANSL3,EP300,SETD1A,CTBP1,KMT2A,SIN3A,HIRA,ATRX,TAF6,VPS72,PAXIP1,CHD4,MED23,SMARCAL1,EMSY,EPC2,SATB2,TAF9,MED4,CXXC1,BRD4,DMAP1,KLF13,ASH2L,PRDM2,WDR5,KDM5A,MTA1,MTA2,PARK7,PABPC1,NCL,RBM15,POLDIP3,SFPQ,TMPO,VIM,TCOF1,HP1BP3,AGAP2,EIF4G2,MORC2A,RPUSD4,AC…
GO:BP	transcription, DNA-templated	GO:0006351	7.1659e-10	9.14473	3532	196	75	21118	HNRNPK,CDC5L,PSPC1,NONO,SNW1,ZNF48,CGGBP1,POLR2B,SP2,SPTY2D1,SLTM,JUP,WIZ,SKAP1,RBL2,NELFA,TAF5,CCNT1,MYBBP1A,SATB1,MED12,MEN1,CREBBP,TAF1,MCRS1,HCFC2,KANSL3,EP300,SETD1A,CTBP1,KMT2A,SIN3A,HIRA,ATRX,TAF6,VPS72,PAXIP1,CHD4,MED23,SMARCAL1,EMSY,EPC2,DIDO1,SATB2,TAF9,MED4,CXXC1,BRD4,DMAP1,KLF13,ASH2L,PRDM2,KDM5A,MTA1,MTA2,PARK7,NCL,RBM15,SFPQ,TMPO,TCOF1,HP1BP3,AGAP2,MORC2A,ACTN1,WASL,RPL23,BAP1,CDK9,…
GO:BP	organic substance biosynthetic process	GO:1901576	1.08587e-09	8.96422	5779	196	101	21118	HNRNPK,CDC5L,PSPC1,RALY,NONO,SNW1,ZNF48,CGGBP1,POLR2B,SP2,SPTY2D1,SLTM,JUP,WIZ,SKAP1,RBL2,NELFA,TAF5,CCNT1,MYBBP1A,SATB1,MED12,MEN1,CREBBP,TAF1,MCRS1,HCFC2,KANSL3,EP300,SETD1A,CTBP1,KMT2A,SIN3A,HIRA,ATRX,TAF6,VPS72,PAXIP1,CHD4,MED23,SMARCAL1,EMSY,EPC2,DIDO1,SATB2,TAF9,MED4,CXXC1,BRD4,DMAP1,KLF13,ASH2L,PRDM2,WDR5,KDM5A,MTA1,MTA2,PARK7,PABPC1,NCL,RBM15,POLDIP3,SFPQ,TMPO,VIM,MCM10,TCOF1,HP1BP3,AGAP2…
GO:BP	regulation of cellular macromolecule biosynthetic process	GO:2000112	1.09214e-09	8.96172	3880	196	79	21118	HNRNPK,CDC5L,PSPC1,NONO,SNW1,ZNF48,CGGBP1,SP2,SPTY2D1,SLTM,JUP,WIZ,SKAP1,RBL2,NELFA,CCNT1,MYBBP1A,SATB1,MED12,MEN1,CREBBP,TAF1,MCRS1,HCFC2,KANSL3,EP300,SETD1A,CTBP1,KMT2A,SIN3A,HIRA,ATRX,TAF6,VPS72,PAXIP1,CHD4,MED23,SMARCAL1,EMSY,EPC2,SATB2,TAF9,MED4,CXXC1,BRD4,DMAP1,KLF13,ASH2L,PRDM2,KDM5A,MTA1,MTA2,PARK7,PABPC1,NCL,RBM15,POLDIP3,SFPQ,TMPO,VIM,TCOF1,HP1BP3,AGAP2,EIF4G2,MORC2A,RPUSD4,ACTN1,WASL,P…
GO:BP	positive regulation of cellular process	GO:0048522	1.32061e-09	8.87922	5796	196	101	21118	HNRNPK,CDC5L,SNW1,ZNF48,JUP,WIZ,SKAP1,NELFA,CCNT1,MYBBP1A,MED12,MEN1,CREBBP,TAF1,MCRS1,HCFC2,KANSL3,EP300,SETD1A,CTBP1,KMT2A,SIN3A,ATRX,TAF6,PAXIP1,SATB2,TAF9,MED4,CXXC1,BRD4,DMAP1,KLF13,ASH2L,PRDM2,WDR5,KDM5A,MTA1,MTA2,ADNP,PARK7,PABPC1,SRSF5,NCL,ZC3H18,ACIN1,RBM15,POLDIP3,SFPQ,SUN2,ALDH3A1,VIM,ANXA5,LMNA,TPX2,NUMA1,KIF20B,TMED9,NUSAP1,SFN,AGAP2,EIF4G2,MORC2A,RPUSD4,SPAST,G3BP1,RASAL3,CBLL1,ACTN…
GO:BP	histone methylation	GO:0016571	1.45253e-09	8.83787	150	196	16	21118	SNW1,NELFA,SATB1,MEN1,CREBBP,SETD1A,KMT2A,ATRX,PAXIP1,RBBP5,CXXC1,BRD4,ASH2L,PRDM2,WDR5,LMNA
GO:BP	regulation of biosynthetic process	GO:0009889	1.92098e-09	8.71648	4167	196	82	21118	HNRNPK,CDC5L,PSPC1,RALY,NONO,SNW1,ZNF48,CGGBP1,SP2,SPTY2D1,SLTM,JUP,WIZ,SKAP1,RBL2,NELFA,CCNT1,MYBBP1A,SATB1,MED12,MEN1,CREBBP,TAF1,MCRS1,HCFC2,KANSL3,EP300,SETD1A,CTBP1,KMT2A,SIN3A,HIRA,ATRX,TAF6,VPS72,PAXIP1,CHD4,MED23,SMARCAL1,EMSY,EPC2,SATB2,TAF9,MED4,CXXC1,BRD4,DMAP1,KLF13,ASH2L,PRDM2,WDR5,KDM5A,MTA1,MTA2,PARK7,PABPC1,NCL,RBM15,POLDIP3,SFPQ,TMPO,VIM,TCOF1,HP1BP3,AGAP2,EIF4G2,MORC2A,RPUSD4,AC…
GO:BP	positive regulation of organelle organization	GO:0010638	2.6208e-09	8.58157	590	196	28	21118	SNW1,NELFA,MEN1,EP300,CTBP1,KMT2A,SIN3A,ATRX,PAXIP1,BRD4,WDR5,SFPQ,LMNA,NUMA1,TMED9,NUSAP1,MORC2A,SPAST,G3BP1,EVL,ARPC3,VASP,WASL,ANXA2,PEBP1,CDK9,VDAC1,ANXA1
GO:BP	macromolecule methylation	GO:0043414	2.71111e-09	8.56685	310	196	21	21118	SNW1,NELFA,SATB1,MEN1,CREBBP,SETD1A,KMT2A,ATRX,PAXIP1,RBBP5,CXXC1,BRD4,ASH2L,PRDM2,WDR5,MTA2,ZC3H13,RBM15,WTAP,LMNA,CBLL1
GO:BP	biosynthetic process	GO:0009058	3.50111e-09	8.45579	5882	196	101	21118	HNRNPK,CDC5L,PSPC1,RALY,NONO,SNW1,ZNF48,CGGBP1,POLR2B,SP2,SPTY2D1,SLTM,JUP,WIZ,SKAP1,RBL2,NELFA,TAF5,CCNT1,MYBBP1A,SATB1,MED12,MEN1,CREBBP,TAF1,MCRS1,HCFC2,KANSL3,EP300,SETD1A,CTBP1,KMT2A,SIN3A,HIRA,ATRX,TAF6,VPS72,PAXIP1,CHD4,MED23,SMARCAL1,EMSY,EPC2,DIDO1,SATB2,TAF9,MED4,CXXC1,BRD4,DMAP1,KLF13,ASH2L,PRDM2,WDR5,KDM5A,MTA1,MTA2,PARK7,PABPC1,NCL,RBM15,POLDIP3,SFPQ,TMPO,VIM,MCM10,TCOF1,HP1BP3,AGAP2…
GO:BP	regulation of nucleic acid-templated transcription	GO:1903506	3.88294e-09	8.41084	3413	196	72	21118	HNRNPK,CDC5L,PSPC1,RALY,NONO,SNW1,ZNF48,CGGBP1,SP2,SPTY2D1,SLTM,JUP,WIZ,SKAP1,RBL2,NELFA,CCNT1,MYBBP1A,SATB1,MED12,MEN1,CREBBP,TAF1,MCRS1,HCFC2,KANSL3,EP300,SETD1A,CTBP1,KMT2A,SIN3A,HIRA,ATRX,TAF6,VPS72,PAXIP1,CHD4,MED23,SMARCAL1,EMSY,EPC2,SATB2,TAF9,MED4,CXXC1,BRD4,DMAP1,KLF13,ASH2L,PRDM2,KDM5A,MTA1,MTA2,PARK7,NCL,RBM15,SFPQ,TMPO,HP1BP3,AGAP2,MORC2A,ACTN1,WASL,RPL23,BAP1,CDK9,HDAC1,SMCHD1,SAP130…
GO:BP	regulation of macromolecule metabolic process	GO:0060255	4.01719e-09	8.39608	6363	196	106	21118	HNRNPK,CDC5L,PSPC1,RALY,NONO,SNW1,ZNF48,CGGBP1,SP2,SPTY2D1,SLTM,JUP,WIZ,SKAP1,RBL2,NELFA,CCNT1,MYBBP1A,SATB1,MED12,MEN1,CREBBP,TAF1,MCRS1,HCFC2,KANSL3,EP300,SETD1A,CTBP1,KMT2A,SIN3A,HIRA,ATRX,TAF6,VPS72,PAXIP1,CHD4,MED23,SMARCAL1,EMSY,EPC2,SATB2,TAF9,MED4,CXXC1,BRD4,DMAP1,KLF13,ASH2L,PRDM2,WDR5,KDM5A,MTA1,MTA2,ADNP,PARK7,WBP11,PABPC1,ALKBH5,SRSF5,NCL,ZC3H18,ACIN1,RBM15,POLDIP3,SFPQ,WTAP,TMPO,VIM,…
GO:BP	regulation of RNA biosynthetic process	GO:2001141	4.11386e-09	8.38575	3417	196	72	21118	HNRNPK,CDC5L,PSPC1,RALY,NONO,SNW1,ZNF48,CGGBP1,SP2,SPTY2D1,SLTM,JUP,WIZ,SKAP1,RBL2,NELFA,CCNT1,MYBBP1A,SATB1,MED12,MEN1,CREBBP,TAF1,MCRS1,HCFC2,KANSL3,EP300,SETD1A,CTBP1,KMT2A,SIN3A,HIRA,ATRX,TAF6,VPS72,PAXIP1,CHD4,MED23,SMARCAL1,EMSY,EPC2,SATB2,TAF9,MED4,CXXC1,BRD4,DMAP1,KLF13,ASH2L,PRDM2,KDM5A,MTA1,MTA2,PARK7,NCL,RBM15,SFPQ,TMPO,HP1BP3,AGAP2,MORC2A,ACTN1,WASL,RPL23,BAP1,CDK9,HDAC1,SMCHD1,SAP130…
GO:BP	regulation of histone modification	GO:0031056	5.29364e-09	8.27625	163	196	16	21118	SNW1,NELFA,MEN1,EP300,CTBP1,KMT2A,SIN3A,ATRX,PAXIP1,BRD4,WDR5,KDM5A,PARK7,LMNA,CDK9,TRIP12
GO:BP	regulation of organelle organization	GO:0033043	5.9058e-09	8.22872	1178	196	39	21118	SNW1,ATXN2L,NELFA,MEN1,MCRS1,EP300,CTBP1,KMT2A,SIN3A,ATRX,PAXIP1,BRD4,WDR5,SFPQ,MKI67,LMNA,TPX2,NUMA1,KIF20B,TMED9,NUSAP1,KIFC1,MORC2A,SPAST,G3BP1,CAPZA1,EVL,ARPC3,VASP,RAC2,SPECC1L,WASL,TWF1,ANXA2,PEBP1,CDK9,MARK2,VDAC1,ANXA1
GO:BP	regulation of transcription, DNA-templated	GO:0006355	1.1558e-08	7.93712	3411	196	71	21118	HNRNPK,CDC5L,PSPC1,NONO,SNW1,ZNF48,CGGBP1,SP2,SPTY2D1,SLTM,JUP,WIZ,SKAP1,RBL2,NELFA,CCNT1,MYBBP1A,SATB1,MED12,MEN1,CREBBP,TAF1,MCRS1,HCFC2,KANSL3,EP300,SETD1A,CTBP1,KMT2A,SIN3A,HIRA,ATRX,TAF6,VPS72,PAXIP1,CHD4,MED23,SMARCAL1,EMSY,EPC2,SATB2,TAF9,MED4,CXXC1,BRD4,DMAP1,KLF13,ASH2L,PRDM2,KDM5A,MTA1,MTA2,PARK7,NCL,RBM15,SFPQ,TMPO,HP1BP3,AGAP2,MORC2A,ACTN1,WASL,RPL23,BAP1,CDK9,HDAC1,SMCHD1,SAP130,HDAC…
GO:BP	positive regulation of chromosome organization	GO:2001252	1.72389e-08	7.76349	176	196	16	21118	SNW1,NELFA,MEN1,EP300,CTBP1,KMT2A,SIN3A,ATRX,PAXIP1,BRD4,WDR5,SFPQ,LMNA,NUMA1,MORC2A,CDK9
GO:BP	regulation of metabolic process	GO:0019222	2.89566e-08	7.53825	6841	196	109	21118	HNRNPK,CDC5L,PSPC1,RALY,NONO,SNW1,ZNF48,CGGBP1,SP2,SPTY2D1,SLTM,JUP,WIZ,SKAP1,RBL2,NELFA,CCNT1,MYBBP1A,SATB1,MED12,MEN1,CREBBP,TAF1,MCRS1,HCFC2,KANSL3,EP300,SETD1A,CTBP1,KMT2A,SIN3A,HIRA,ATRX,TAF6,VPS72,PAXIP1,CHD4,MED23,SMARCAL1,EMSY,EPC2,SATB2,TAF9,MED4,CXXC1,BRD4,DMAP1,KLF13,ASH2L,PRDM2,WDR5,KDM5A,MTA1,MTA2,ADNP,PARK7,WBP11,PABPC1,RBM26,ALKBH5,SRSF5,NCL,ZC3H18,ACIN1,RBM15,POLDIP3,SFPQ,WTAP,TMP…
GO:BP	nucleobase-containing compound biosynthetic process	GO:0034654	2.92894e-08	7.53329	3963	196	77	21118	HNRNPK,CDC5L,PSPC1,RALY,NONO,SNW1,ZNF48,CGGBP1,POLR2B,SP2,SPTY2D1,SLTM,JUP,WIZ,SKAP1,RBL2,NELFA,TAF5,CCNT1,MYBBP1A,SATB1,MED12,MEN1,CREBBP,TAF1,MCRS1,HCFC2,KANSL3,EP300,SETD1A,CTBP1,KMT2A,SIN3A,HIRA,ATRX,TAF6,VPS72,PAXIP1,CHD4,MED23,SMARCAL1,EMSY,EPC2,DIDO1,SATB2,TAF9,MED4,CXXC1,BRD4,DMAP1,KLF13,ASH2L,PRDM2,KDM5A,MTA1,MTA2,PARK7,NCL,RBM15,SFPQ,TMPO,TCOF1,HP1BP3,AGAP2,MORC2A,ACTN1,WASL,RPL23,BAP1,…
GO:BP	methylation	GO:0032259	3.03643e-08	7.51764	352	196	21	21118	SNW1,NELFA,SATB1,MEN1,CREBBP,SETD1A,KMT2A,ATRX,PAXIP1,RBBP5,CXXC1,BRD4,ASH2L,PRDM2,WDR5,MTA2,ZC3H13,RBM15,WTAP,LMNA,CBLL1
GO:BP	mRNA processing	GO:0006397	3.27791e-08	7.4844	475	196	24	21118	HNRNPK,CDC5L,PSPC1,PABPN1,RALY,NONO,SNW1,SLTM,CCNT1,CRNKL1,WBP11,PABPC1,RBM26,ALKBH5,SRSF5,NCL,AQR,ZC3H13,ACIN1,TRA2A,RBM15,SFPQ,WTAP,CDK9
GO:BP	positive regulation of cellular biosynthetic process	GO:0031328	4.30616e-08	7.36591	1956	196	50	21118	HNRNPK,CDC5L,SNW1,ZNF48,JUP,WIZ,SKAP1,NELFA,CCNT1,MED12,MEN1,CREBBP,MCRS1,HCFC2,KANSL3,EP300,SETD1A,KMT2A,SIN3A,ATRX,TAF6,PAXIP1,SATB2,TAF9,MED4,CXXC1,BRD4,KLF13,ASH2L,PRDM2,WDR5,KDM5A,MTA1,MTA2,PARK7,NCL,RBM15,POLDIP3,SFPQ,VIM,AGAP2,EIF4G2,RPUSD4,ACTN1,WASL,RPS9,CDK9,HDAC1,SMARCA5,ANXA1
GO:BP	positive regulation of macromolecule biosynthetic process	GO:0010557	6.49149e-08	7.18766	1844	196	48	21118	HNRNPK,CDC5L,SNW1,ZNF48,JUP,WIZ,SKAP1,NELFA,CCNT1,MED12,MEN1,CREBBP,MCRS1,HCFC2,KANSL3,EP300,SETD1A,KMT2A,SIN3A,ATRX,TAF6,PAXIP1,SATB2,TAF9,MED4,CXXC1,BRD4,KLF13,ASH2L,PRDM2,KDM5A,MTA1,MTA2,PARK7,NCL,RBM15,POLDIP3,SFPQ,VIM,AGAP2,EIF4G2,RPUSD4,ACTN1,WASL,RPS9,CDK9,HDAC1,SMARCA5
GO:BP	heterocycle biosynthetic process	GO:0018130	6.66447e-08	7.17623	4028	196	77	21118	HNRNPK,CDC5L,PSPC1,RALY,NONO,SNW1,ZNF48,CGGBP1,POLR2B,SP2,SPTY2D1,SLTM,JUP,WIZ,SKAP1,RBL2,NELFA,TAF5,CCNT1,MYBBP1A,SATB1,MED12,MEN1,CREBBP,TAF1,MCRS1,HCFC2,KANSL3,EP300,SETD1A,CTBP1,KMT2A,SIN3A,HIRA,ATRX,TAF6,VPS72,PAXIP1,CHD4,MED23,SMARCAL1,EMSY,EPC2,DIDO1,SATB2,TAF9,MED4,CXXC1,BRD4,DMAP1,KLF13,ASH2L,PRDM2,KDM5A,MTA1,MTA2,PARK7,NCL,RBM15,SFPQ,TMPO,TCOF1,HP1BP3,AGAP2,MORC2A,ACTN1,WASL,RPL23,BAP1,…
GO:BP	protein methylation	GO:0006479	7.56983e-08	7.12091	194	196	16	21118	SNW1,NELFA,SATB1,MEN1,CREBBP,SETD1A,KMT2A,ATRX,PAXIP1,RBBP5,CXXC1,BRD4,ASH2L,PRDM2,WDR5,LMNA
GO:BP	protein alkylation	GO:0008213	7.56983e-08	7.12091	194	196	16	21118	SNW1,NELFA,SATB1,MEN1,CREBBP,SETD1A,KMT2A,ATRX,PAXIP1,RBBP5,CXXC1,BRD4,ASH2L,PRDM2,WDR5,LMNA
GO:BP	aromatic compound biosynthetic process	GO:0019438	7.9325e-08	7.10059	4042	196	77	21118	HNRNPK,CDC5L,PSPC1,RALY,NONO,SNW1,ZNF48,CGGBP1,POLR2B,SP2,SPTY2D1,SLTM,JUP,WIZ,SKAP1,RBL2,NELFA,TAF5,CCNT1,MYBBP1A,SATB1,MED12,MEN1,CREBBP,TAF1,MCRS1,HCFC2,KANSL3,EP300,SETD1A,CTBP1,KMT2A,SIN3A,HIRA,ATRX,TAF6,VPS72,PAXIP1,CHD4,MED23,SMARCAL1,EMSY,EPC2,DIDO1,SATB2,TAF9,MED4,CXXC1,BRD4,DMAP1,KLF13,ASH2L,PRDM2,KDM5A,MTA1,MTA2,PARK7,NCL,RBM15,SFPQ,TMPO,TCOF1,HP1BP3,AGAP2,MORC2A,ACTN1,WASL,RPL23,BAP1,…
GO:BP	histone H4 acetylation	GO:0043967	8.5757e-08	7.06673	70	196	11	21118	KANSL1,MCRS1,KANSL3,EP300,CTBP1,KMT2A,KANSL2,EP400,BRD4,DMAP1,WDR5
GO:BP	transcription by RNA polymerase II	GO:0006366	9.31935e-08	7.03061	2492	196	57	21118	HNRNPK,CDC5L,SNW1,ZNF48,CGGBP1,POLR2B,SP2,SLTM,JUP,WIZ,SKAP1,RBL2,NELFA,TAF5,CCNT1,SATB1,MED12,MEN1,CREBBP,TAF1,MCRS1,HCFC2,KANSL3,EP300,CTBP1,KMT2A,SIN3A,ATRX,TAF6,PAXIP1,CHD4,SMARCAL1,EPC2,SATB2,TAF9,MED4,BRD4,DMAP1,KLF13,ASH2L,PRDM2,KDM5A,MTA1,MTA2,PARK7,NCL,RBM15,SFPQ,AGAP2,WASL,RPL23,CDK9,HDAC1,SAP130,HDAC7,SMARCA5,DNAJB1
GO:BP	positive regulation of biosynthetic process	GO:0009891	9.40794e-08	7.02651	1999	196	50	21118	HNRNPK,CDC5L,SNW1,ZNF48,JUP,WIZ,SKAP1,NELFA,CCNT1,MED12,MEN1,CREBBP,MCRS1,HCFC2,KANSL3,EP300,SETD1A,KMT2A,SIN3A,ATRX,TAF6,PAXIP1,SATB2,TAF9,MED4,CXXC1,BRD4,KLF13,ASH2L,PRDM2,WDR5,KDM5A,MTA1,MTA2,PARK7,NCL,RBM15,POLDIP3,SFPQ,VIM,AGAP2,EIF4G2,RPUSD4,ACTN1,WASL,RPS9,CDK9,HDAC1,SMARCA5,ANXA1
GO:BP	positive regulation of chromatin organization	GO:1905269	1.16608e-07	6.93327	116	196	13	21118	SNW1,NELFA,MEN1,EP300,CTBP1,KMT2A,SIN3A,PAXIP1,BRD4,WDR5,LMNA,MORC2A,CDK9
GO:BP	positive regulation of cellular component organization	GO:0051130	1.8074e-07	6.74295	1200	196	37	21118	HNRNPK,SNW1,SKAP1,NELFA,MEN1,EP300,CTBP1,KMT2A,SIN3A,ATRX,PAXIP1,BRD4,WDR5,ADNP,PARK7,SFPQ,LMNA,NUMA1,TMED9,NUSAP1,EIF4G2,MORC2A,SPAST,G3BP1,CBLL1,EVL,ARPC3,VASP,RAC2,WASL,TWF1,ANXA2,PEBP1,CDK9,MARK2,VDAC1,ANXA1
GO:BP	negative regulation of cellular process	GO:0048523	1.97617e-07	6.70418	5068	196	88	21118	HNRNPK,PSPC1,NONO,SNW1,CGGBP1,SP2,JUP,NCOA5,RBL2,NELFA,CCNT1,MYBBP1A,SATB1,MEN1,CREBBP,TAF1,MCRS1,HCFC2,EP300,CTBP1,KMT2A,SIN3A,ATRX,TAF6,CHD4,SMARCAL1,SATB2,TAF9,DMAP1,KLF13,PRDM2,WDR5,KDM5A,MTA1,MTA2,ADNP,PRDX4,PARK7,PABPC1,RBM26,NCL,ACIN1,RBM15,SFPQ,VIM,ANXA5,LMNA,TPX2,KIFC1,SFN,AGAP2,EIF4G2,MORC2A,PKP1,G3BP1,NUP153,RASAL3,CBLL1,ACTN1,LCK,CAPZA1,EVL,SPECC1L,DOCK8,WASL,TWF1,INPP5D,TRIM33,ANXA2,…
GO:BP	histone lysine methylation	GO:0034968	1.99719e-07	6.69958	121	196	13	21118	SNW1,NELFA,MEN1,SETD1A,KMT2A,ATRX,PAXIP1,RBBP5,CXXC1,BRD4,ASH2L,WDR5,LMNA
GO:BP	mRNA metabolic process	GO:0016071	2.14316e-07	6.66895	662	196	27	21118	HNRNPK,CDC5L,PSPC1,PABPN1,RALY,NONO,SNW1,SLTM,CCNT1,CRNKL1,WBP11,PABPC1,RBM26,ALKBH5,SRSF5,NCL,AQR,ZC3H13,ACIN1,TRA2A,RBM15,SFPQ,WTAP,VIM,PKP1,CBLL1,CDK9
GO:BP	cellular protein metabolic process	GO:0044267	2.25937e-07	6.64601	4815	196	85	21118	SNW1,NELFA,CCNT1,SATB1,MED12,MEN1,CREBBP,KANSL1,TAF1,MCRS1,KANSL3,EP300,SETD1A,CTBP1,KMT2A,SIN3A,ATRX,TAF6,PAXIP1,KANSL2,RBBP5,EPC2,EP400,TAF9,CXXC1,BRD4,DMAP1,ASH2L,PRDM2,WDR5,KDM5A,MTA1,MTA2,ADNP,PRDX4,PARK7,WBP11,PABPC1,NCL,POLDIP3,SFPQ,VIM,LMNA,TPX2,TCOF1,SFN,AGAP2,EIF4G2,PGAM5,RPUSD4,CBLL1,LCK,RAC2,TWF1,PPP1CA,TRIM33,ANXA2,PEBP1,CSNK1A1,PSMB1,RPL27A,RPL7,RPS2,RPL6,RPL27,RPS18,RPL23,RPL32,UBA…
GO:BP	cell cycle	GO:0007049	2.80761e-07	6.55166	1657	196	44	21118	CDC5L,WIZ,RBL2,CCNT1,MEN1,TAF1,EP300,CTBP1,SIN3A,ATRX,TAF6,PAXIP1,BRD4,SRSF5,SFPQ,WTAP,SUN2,MKI67,LMNA,TUBGCP6,TPX2,KIFC5B,NUMA1,TUBGCP3,KIF20B,TUBGCP2,NUSAP1,KIFC1,SFN,SPAST,KPNB1,NUP153,SPECC1L,WASL,PPP1CA,PEBP1,CSNK1A1,PPP2R1A,RCC2,RPL24,BAP1,CLIC1,ANXA1,FHL1
GO:BP	macromolecule modification	GO:0043412	3.1678e-07	6.49924	3823	196	73	21118	SNW1,NELFA,CCNT1,SATB1,MED12,MEN1,CREBBP,KANSL1,TAF1,MCRS1,KANSL3,EP300,SETD1A,CTBP1,KMT2A,SIN3A,ATRX,TAF6,PAXIP1,KANSL2,RBBP5,EPC2,EP400,TAF9,CXXC1,BRD4,DMAP1,ASH2L,PRDM2,WDR5,KDM5A,MTA1,MTA2,ADNP,PRDX4,PARK7,WBP11,ALKBH5,ZC3H13,RBM15,SFPQ,WTAP,LMNA,TPX2,SFN,AGAP2,MORC2A,PGAM5,RPUSD4,CBLL1,LCK,RAC2,TWF1,PPP1CA,TRIM33,ANXA2,PEBP1,CSNK1A1,RPS2,RPL23,UBA52,MARK3,PPP2R1A,BAP1,CDK9,HDAC1,TRIP12,MARK2…
GO:BP	regulation of transcription by RNA polymerase II	GO:0006357	3.19438e-07	6.49561	2425	196	55	21118	HNRNPK,CDC5L,SNW1,ZNF48,CGGBP1,SP2,SLTM,JUP,WIZ,SKAP1,RBL2,NELFA,CCNT1,SATB1,MED12,MEN1,CREBBP,TAF1,MCRS1,HCFC2,KANSL3,EP300,CTBP1,KMT2A,SIN3A,ATRX,TAF6,PAXIP1,CHD4,SMARCAL1,EPC2,SATB2,TAF9,MED4,BRD4,DMAP1,KLF13,ASH2L,PRDM2,KDM5A,MTA1,MTA2,PARK7,NCL,RBM15,SFPQ,AGAP2,WASL,RPL23,CDK9,HDAC1,SAP130,HDAC7,SMARCA5,DNAJB1
GO:BP	regulation of cellular component organization	GO:0051128	3.34712e-07	6.47533	2428	196	55	21118	HNRNPK,SNW1,SPTY2D1,ATXN2L,SKAP1,NELFA,MEN1,MCRS1,EP300,SETD1A,CTBP1,KMT2A,SIN3A,ATRX,PAXIP1,BRD4,WDR5,KDM5A,ADNP,PARK7,SFPQ,MKI67,VIM,LMNA,TPX2,NUMA1,KIF20B,TMED9,NUSAP1,KIFC1,SFN,EIF4G2,MORC2A,SPAST,G3BP1,CBLL1,CAPZA1,EVL,ARPC3,VASP,RAC2,SPECC1L,WASL,TWF1,ANXA2,PEBP1,RCC2,BAP1,CDK9,TRIP12,MARK2,VDAC1,DNAJB1,ANXA1,FHL1
GO:BP	negative regulation of nucleobase-containing compound metabolic process	GO:0045934	3.69166e-07	6.43278	1606	196	43	21118	HNRNPK,PSPC1,NONO,SNW1,CGGBP1,SP2,NELFA,CCNT1,MYBBP1A,SATB1,MEN1,CREBBP,TAF1,MCRS1,HCFC2,EP300,CTBP1,KMT2A,SIN3A,ATRX,CHD4,SATB2,DMAP1,PRDM2,KDM5A,MTA1,MTA2,PABPC1,ACIN1,RBM15,SFPQ,MORC2A,PKP1,RPL23,BAP1,CDK9,HDAC1,TRIP12,SMCHD1,SAP130,HDAC7,SMARCA5,DNAJB1
GO:BP	organic cyclic compound biosynthetic process	GO:1901362	4.23669e-07	6.37297	4181	196	77	21118	HNRNPK,CDC5L,PSPC1,RALY,NONO,SNW1,ZNF48,CGGBP1,POLR2B,SP2,SPTY2D1,SLTM,JUP,WIZ,SKAP1,RBL2,NELFA,TAF5,CCNT1,MYBBP1A,SATB1,MED12,MEN1,CREBBP,TAF1,MCRS1,HCFC2,KANSL3,EP300,SETD1A,CTBP1,KMT2A,SIN3A,HIRA,ATRX,TAF6,VPS72,PAXIP1,CHD4,MED23,SMARCAL1,EMSY,EPC2,DIDO1,SATB2,TAF9,MED4,CXXC1,BRD4,DMAP1,KLF13,ASH2L,PRDM2,KDM5A,MTA1,MTA2,PARK7,NCL,RBM15,SFPQ,TMPO,TCOF1,HP1BP3,AGAP2,MORC2A,ACTN1,WASL,RPL23,BAP1,…
GO:BP	chromatin remodeling	GO:0006338	4.26211e-07	6.37038	156	196	14	21118	SPTY2D1,SATB1,MEN1,HCFC2,ATRX,VPS72,SATB2,DMAP1,KDM5A,MTA2,MORC2A,HDAC1,SMCHD1,SMARCA5
GO:BP	positive regulation of RNA metabolic process	GO:0051254	4.26475e-07	6.37011	1745	196	45	21118	HNRNPK,CDC5L,SNW1,ZNF48,JUP,SKAP1,NELFA,CCNT1,MED12,MEN1,CREBBP,MCRS1,HCFC2,KANSL3,EP300,SETD1A,KMT2A,SIN3A,ATRX,TAF6,PAXIP1,SATB2,TAF9,MED4,CXXC1,BRD4,KLF13,ASH2L,PRDM2,KDM5A,MTA1,MTA2,PARK7,PABPC1,SRSF5,NCL,ZC3H18,RBM15,SFPQ,AGAP2,ACTN1,WASL,CDK9,HDAC1,SMARCA5
GO:BP	cellular process	GO:0009987	5.04323e-07	6.29729	17828	196	192	21118	HNRNPK,CDC5L,PSPC1,PABPN1,RALY,NONO,SNW1,ZNF48,CGGBP1,POLR2B,SP2,SPTY2D1,SLTM,JUP,NCOA5,ATXN2L,WIZ,SKAP1,NFRKB,RBL2,NELFA,TAF5,CCNT1,MYBBP1A,SATB1,MED12,MEN1,CREBBP,KANSL1,TAF1,MCRS1,HCFC2,KANSL3,EP300,SETD1A,CTBP1,KMT2A,SIN3A,HIRA,ATRX,TAF6,VPS72,PAXIP1,CHD4,MED23,SMARCAL1,EMSY,KANSL2,RBBP5,EPC2,DIDO1,EP400,SATB2,TAF9,MED4,CXXC1,BRD4,DMAP1,KLF13,ASH2L,PRDM2,WDR5,KDM5A,MTA1,MTA2,ADNP,PRDX4,PARK7,…
GO:BP	positive regulation of macromolecule metabolic process	GO:0010604	5.99733e-07	6.22204	3467	196	68	21118	HNRNPK,CDC5L,SNW1,ZNF48,JUP,WIZ,SKAP1,NELFA,CCNT1,MED12,MEN1,CREBBP,TAF1,MCRS1,HCFC2,KANSL3,EP300,SETD1A,CTBP1,KMT2A,SIN3A,ATRX,TAF6,PAXIP1,SATB2,TAF9,MED4,CXXC1,BRD4,KLF13,ASH2L,PRDM2,WDR5,KDM5A,MTA1,MTA2,ADNP,PARK7,PABPC1,SRSF5,NCL,ZC3H18,RBM15,POLDIP3,SFPQ,VIM,LMNA,TPX2,AGAP2,EIF4G2,MORC2A,RPUSD4,PKP1,G3BP1,ACTN1,LCK,WASL,ANXA2,CSNK1A1,RPS2,RPL23,RPS9,CDK9,HDAC1,SMCHD1,SMARCA5,TNC,ANXA1
GO:BP	peptidyl-amino acid modification	GO:0018193	7.75287e-07	6.11054	1264	196	37	21118	SNW1,NELFA,MEN1,CREBBP,KANSL1,TAF1,MCRS1,KANSL3,EP300,SETD1A,CTBP1,KMT2A,SIN3A,ATRX,TAF6,PAXIP1,KANSL2,RBBP5,EPC2,EP400,TAF9,CXXC1,BRD4,DMAP1,ASH2L,WDR5,ADNP,PRDX4,PARK7,LMNA,LCK,TWF1,CSNK1A1,MARK3,HDAC1,MARK2,PPIB
GO:BP	peptidyl-lysine methylation	GO:0018022	7.95202e-07	6.09952	135	196	13	21118	SNW1,NELFA,MEN1,SETD1A,KMT2A,ATRX,PAXIP1,RBBP5,CXXC1,BRD4,ASH2L,WDR5,LMNA
GO:BP	positive regulation of cellular metabolic process	GO:0031325	1.10693e-06	5.95588	3275	196	65	21118	HNRNPK,CDC5L,SNW1,ZNF48,JUP,WIZ,SKAP1,NELFA,CCNT1,MED12,MEN1,CREBBP,TAF1,MCRS1,HCFC2,KANSL3,EP300,SETD1A,CTBP1,KMT2A,SIN3A,ATRX,TAF6,PAXIP1,SATB2,TAF9,MED4,CXXC1,BRD4,KLF13,ASH2L,PRDM2,WDR5,KDM5A,MTA1,MTA2,ADNP,PARK7,PABPC1,SRSF5,NCL,ZC3H18,RBM15,POLDIP3,SFPQ,VIM,LMNA,TPX2,AGAP2,EIF4G2,RPUSD4,ACTN1,LCK,WASL,ANXA2,PEBP1,CSNK1A1,RPS2,RPS9,CDK9,HDAC1,SMCHD1,SMARCA5,VDAC1,ANXA1
GO:BP	RNA processing	GO:0006396	1.38832e-06	5.85751	881	196	30	21118	HNRNPK,CDC5L,PSPC1,PABPN1,RALY,NONO,SNW1,SLTM,CCNT1,CRNKL1,WBP11,PABPC1,RBM26,ALKBH5,INTS8,SRSF5,NCL,AQR,ZC3H13,ACIN1,TRA2A,RBM15,SFPQ,WTAP,INTS1,RPUSD4,RPL7A,RPL7,RPL27,CDK9
GO:BP	positive regulation of transcription, DNA-templated	GO:0045893	1.55708e-06	5.80769	1616	196	42	21118	HNRNPK,CDC5L,SNW1,ZNF48,JUP,SKAP1,NELFA,CCNT1,MED12,MEN1,CREBBP,MCRS1,HCFC2,KANSL3,EP300,SETD1A,KMT2A,SIN3A,ATRX,TAF6,PAXIP1,SATB2,TAF9,MED4,CXXC1,BRD4,KLF13,ASH2L,PRDM2,KDM5A,MTA1,MTA2,PARK7,NCL,RBM15,SFPQ,AGAP2,ACTN1,WASL,CDK9,HDAC1,SMARCA5
GO:BP	positive regulation of nucleic acid-templated transcription	GO:1903508	1.55708e-06	5.80769	1616	196	42	21118	HNRNPK,CDC5L,SNW1,ZNF48,JUP,SKAP1,NELFA,CCNT1,MED12,MEN1,CREBBP,MCRS1,HCFC2,KANSL3,EP300,SETD1A,KMT2A,SIN3A,ATRX,TAF6,PAXIP1,SATB2,TAF9,MED4,CXXC1,BRD4,KLF13,ASH2L,PRDM2,KDM5A,MTA1,MTA2,PARK7,NCL,RBM15,SFPQ,AGAP2,ACTN1,WASL,CDK9,HDAC1,SMARCA5
GO:BP	positive regulation of RNA biosynthetic process	GO:1902680	1.58641e-06	5.79958	1617	196	42	21118	HNRNPK,CDC5L,SNW1,ZNF48,JUP,SKAP1,NELFA,CCNT1,MED12,MEN1,CREBBP,MCRS1,HCFC2,KANSL3,EP300,SETD1A,KMT2A,SIN3A,ATRX,TAF6,PAXIP1,SATB2,TAF9,MED4,CXXC1,BRD4,KLF13,ASH2L,PRDM2,KDM5A,MTA1,MTA2,PARK7,NCL,RBM15,SFPQ,AGAP2,ACTN1,WASL,CDK9,HDAC1,SMARCA5
GO:BP	positive regulation of nitrogen compound metabolic process	GO:0051173	1.65105e-06	5.78224	3069	196	62	21118	HNRNPK,CDC5L,SNW1,ZNF48,JUP,SKAP1,NELFA,CCNT1,MED12,MEN1,CREBBP,TAF1,MCRS1,HCFC2,KANSL3,EP300,SETD1A,CTBP1,KMT2A,SIN3A,ATRX,TAF6,PAXIP1,SATB2,TAF9,MED4,CXXC1,BRD4,KLF13,ASH2L,PRDM2,WDR5,KDM5A,MTA1,MTA2,ADNP,PARK7,PABPC1,SRSF5,NCL,ZC3H18,RBM15,POLDIP3,SFPQ,VIM,LMNA,TPX2,AGAP2,EIF4G2,RPUSD4,ACTN1,LCK,WASL,ANXA2,PEBP1,CSNK1A1,RPS2,RPS9,CDK9,HDAC1,SMCHD1,SMARCA5
GO:BP	regulation of chromosome organization	GO:0033044	2.18948e-06	5.65966	280	196	17	21118	SNW1,NELFA,MEN1,MCRS1,EP300,CTBP1,KMT2A,SIN3A,ATRX,PAXIP1,BRD4,WDR5,SFPQ,LMNA,NUMA1,MORC2A,CDK9
GO:BP	negative regulation of RNA metabolic process	GO:0051253	2.26197e-06	5.64551	1505	196	40	21118	HNRNPK,PSPC1,NONO,SNW1,CGGBP1,SP2,NELFA,CCNT1,MYBBP1A,SATB1,MEN1,CREBBP,TAF1,HCFC2,EP300,CTBP1,SIN3A,ATRX,CHD4,SATB2,DMAP1,PRDM2,KDM5A,MTA1,MTA2,PABPC1,ACIN1,RBM15,SFPQ,MORC2A,PKP1,RPL23,BAP1,CDK9,HDAC1,SMCHD1,SAP130,HDAC7,SMARCA5,DNAJB1
GO:BP	positive regulation of transcription by RNA polymerase II	GO:0045944	2.30347e-06	5.63762	1253	196	36	21118	HNRNPK,CDC5L,SNW1,ZNF48,JUP,SKAP1,NELFA,CCNT1,MED12,MEN1,CREBBP,MCRS1,KANSL3,EP300,KMT2A,SIN3A,ATRX,TAF6,PAXIP1,SATB2,TAF9,MED4,BRD4,KLF13,ASH2L,PRDM2,MTA2,PARK7,NCL,RBM15,SFPQ,AGAP2,WASL,CDK9,HDAC1,SMARCA5
GO:BP	positive regulation of nucleobase-containing compound metabolic process	GO:0045935	2.44728e-06	5.61132	1912	196	46	21118	HNRNPK,CDC5L,SNW1,ZNF48,JUP,SKAP1,NELFA,CCNT1,MED12,MEN1,CREBBP,MCRS1,HCFC2,KANSL3,EP300,SETD1A,KMT2A,SIN3A,ATRX,TAF6,PAXIP1,SATB2,TAF9,MED4,CXXC1,BRD4,KLF13,ASH2L,PRDM2,KDM5A,MTA1,MTA2,PARK7,PABPC1,SRSF5,NCL,ZC3H18,RBM15,SFPQ,AGAP2,ACTN1,WASL,CDK9,HDAC1,SMCHD1,SMARCA5
GO:BP	positive regulation of metabolic process	GO:0009893	2.91564e-06	5.53527	3760	196	70	21118	HNRNPK,CDC5L,SNW1,ZNF48,JUP,WIZ,SKAP1,NELFA,CCNT1,MED12,MEN1,CREBBP,TAF1,MCRS1,HCFC2,KANSL3,EP300,SETD1A,CTBP1,KMT2A,SIN3A,ATRX,TAF6,PAXIP1,SATB2,TAF9,MED4,CXXC1,BRD4,KLF13,ASH2L,PRDM2,WDR5,KDM5A,MTA1,MTA2,ADNP,PARK7,PABPC1,SRSF5,NCL,ZC3H18,RBM15,POLDIP3,SFPQ,VIM,LMNA,TPX2,AGAP2,EIF4G2,MORC2A,RPUSD4,PKP1,G3BP1,ACTN1,LCK,WASL,ANXA2,PEBP1,CSNK1A1,RPS2,RPL23,RPS9,CDK9,HDAC1,SMCHD1,SMARCA5,VDAC1,TNC,…
GO:BP	negative regulation of biological process	GO:0048519	4.11206e-06	5.38594	5544	196	90	21118	HNRNPK,PSPC1,NONO,SNW1,CGGBP1,SP2,JUP,NCOA5,RBL2,NELFA,CCNT1,MYBBP1A,SATB1,MEN1,CREBBP,TAF1,MCRS1,HCFC2,EP300,CTBP1,KMT2A,SIN3A,ATRX,TAF6,CHD4,SMARCAL1,SATB2,TAF9,DMAP1,KLF13,PRDM2,WDR5,KDM5A,MTA1,MTA2,ADNP,PRDX4,PARK7,PABPC1,RBM26,ALKBH5,NCL,ACIN1,RBM15,SFPQ,VIM,ANXA5,LMNA,TPX2,KIFC1,SFN,AGAP2,EIF4G2,MORC2A,PGAM5,PKP1,G3BP1,NUP153,RASAL3,CBLL1,ACTN1,LCK,CAPZA1,EVL,SPECC1L,DOCK8,WASL,TWF1,INPP5D,…
GO:BP	positive regulation of histone modification	GO:0031058	6.05912e-06	5.21759	103	196	11	21118	SNW1,NELFA,MEN1,EP300,CTBP1,KMT2A,PAXIP1,BRD4,WDR5,LMNA,CDK9
GO:BP	histone H3-K4 methylation	GO:0051568	1.25559e-05	4.90115	63	196	9	21118	SNW1,NELFA,SETD1A,KMT2A,PAXIP1,RBBP5,CXXC1,ASH2L,WDR5
GO:BP	protein modification process	GO:0036211	1.34503e-05	4.87127	3644	196	67	21118	SNW1,NELFA,CCNT1,SATB1,MED12,MEN1,CREBBP,KANSL1,TAF1,MCRS1,KANSL3,EP300,SETD1A,CTBP1,KMT2A,SIN3A,ATRX,TAF6,PAXIP1,KANSL2,RBBP5,EPC2,EP400,TAF9,CXXC1,BRD4,DMAP1,ASH2L,PRDM2,WDR5,KDM5A,MTA1,MTA2,ADNP,PRDX4,PARK7,WBP11,SFPQ,LMNA,TPX2,SFN,AGAP2,PGAM5,CBLL1,LCK,RAC2,TWF1,PPP1CA,TRIM33,ANXA2,PEBP1,CSNK1A1,RPS2,RPL23,UBA52,MARK3,PPP2R1A,BAP1,CDK9,HDAC1,TRIP12,MARK2,HDAC7,HSP90B1,PPIB,PDIA6,ANXA1
GO:BP	cellular protein modification process	GO:0006464	1.34503e-05	4.87127	3644	196	67	21118	SNW1,NELFA,CCNT1,SATB1,MED12,MEN1,CREBBP,KANSL1,TAF1,MCRS1,KANSL3,EP300,SETD1A,CTBP1,KMT2A,SIN3A,ATRX,TAF6,PAXIP1,KANSL2,RBBP5,EPC2,EP400,TAF9,CXXC1,BRD4,DMAP1,ASH2L,PRDM2,WDR5,KDM5A,MTA1,MTA2,ADNP,PRDX4,PARK7,WBP11,SFPQ,LMNA,TPX2,SFN,AGAP2,PGAM5,CBLL1,LCK,RAC2,TWF1,PPP1CA,TRIM33,ANXA2,PEBP1,CSNK1A1,RPS2,RPL23,UBA52,MARK3,PPP2R1A,BAP1,CDK9,HDAC1,TRIP12,MARK2,HDAC7,HSP90B1,PPIB,PDIA6,ANXA1
GO:BP	negative regulation of metabolic process	GO:0009892	1.40159e-05	4.85338	3239	196	62	21118	HNRNPK,PSPC1,NONO,SNW1,CGGBP1,SP2,RBL2,NELFA,CCNT1,MYBBP1A,SATB1,MEN1,CREBBP,TAF1,MCRS1,HCFC2,EP300,CTBP1,KMT2A,SIN3A,ATRX,CHD4,SMARCAL1,SATB2,TAF9,DMAP1,PRDM2,WDR5,KDM5A,MTA1,MTA2,ADNP,PARK7,PABPC1,RBM26,ALKBH5,NCL,ACIN1,RBM15,SFPQ,VIM,SFN,AGAP2,EIF4G2,MORC2A,PGAM5,PKP1,INPP5D,ANXA2,PEBP1,RPL23,BAP1,CDK9,HDAC1,TRIP12,SMCHD1,SAP130,HDAC7,SMARCA5,VDAC1,DNAJB1,ANXA1
GO:BP	cellular response to DNA damage stimulus	GO:0006974	1.88982e-05	4.72358	759	196	26	21118	HNRNPK,CDC5L,NONO,SNW1,NFRKB,MEN1,TAF1,MCRS1,EP300,ATRX,PAXIP1,SMARCAL1,EMSY,RBBP5,EPC2,DMAP1,ASH2L,MTA1,PARK7,SFPQ,MCM10,SFN,MORC2A,CDK9,TRIP12,SMCHD1
GO:BP	positive regulation of histone methylation	GO:0031062	2.11665e-05	4.67435	47	196	8	21118	SNW1,NELFA,MEN1,KMT2A,PAXIP1,BRD4,WDR5,LMNA
GO:BP	cellular component biogenesis	GO:0044085	2.71163e-05	4.56677	2974	196	58	21118	SPTY2D1,JUP,ATXN2L,SKAP1,MYBBP1A,TAF1,EP300,KMT2A,HIRA,ATRX,TAF9,ADNP,PARK7,CRNKL1,WBP11,NCL,TUBGCP6,TPX2,KIFC5B,NUMA1,TUBGCP3,TUBGCP2,KIFC1,HP1BP3,MORC2A,RPUSD4,SPAST,KPNB1,PKP1,G3BP1,NUP205,NUP153,ACTN1,CAPZA1,EVL,ARPC3,VASP,RAC2,WASL,TWF1,ANXA2,RPL7A,RPL7,RPS2,RPL6,RPL27,PPP2R1A,RCC2,RPL24,PRRC2C,HDAC1,HIST2H2BB,SMCHD1,HDAC7,SMARCA5,ALDOA,HSP90B1,DNAJB1
GO:BP	negative regulation of macromolecule metabolic process	GO:0010605	3.67886e-05	4.43429	2999	196	58	21118	HNRNPK,PSPC1,NONO,SNW1,CGGBP1,SP2,RBL2,NELFA,CCNT1,MYBBP1A,SATB1,MEN1,CREBBP,TAF1,MCRS1,HCFC2,EP300,CTBP1,KMT2A,SIN3A,ATRX,CHD4,SMARCAL1,SATB2,TAF9,DMAP1,PRDM2,WDR5,KDM5A,MTA1,MTA2,ADNP,PARK7,PABPC1,ALKBH5,NCL,ACIN1,RBM15,SFPQ,VIM,SFN,AGAP2,MORC2A,PKP1,INPP5D,ANXA2,PEBP1,RPL23,BAP1,CDK9,HDAC1,TRIP12,SMCHD1,SAP130,HDAC7,SMARCA5,DNAJB1,ANXA1
GO:BP	histone H4-K16 acetylation	GO:0043984	5.5015e-05	4.25952	21	196	6	21118	KANSL1,MCRS1,KANSL3,KMT2A,KANSL2,WDR5
GO:BP	negative regulation of cellular metabolic process	GO:0031324	6.56089e-05	4.18304	2731	196	54	21118	HNRNPK,PSPC1,NONO,SNW1,CGGBP1,SP2,NELFA,CCNT1,MYBBP1A,SATB1,MEN1,CREBBP,TAF1,MCRS1,HCFC2,EP300,CTBP1,KMT2A,SIN3A,ATRX,CHD4,SMARCAL1,SATB2,TAF9,DMAP1,PRDM2,WDR5,KDM5A,MTA1,MTA2,PARK7,PABPC1,RBM26,NCL,ACIN1,RBM15,SFPQ,SFN,EIF4G2,MORC2A,PKP1,ANXA2,PEBP1,RPL23,BAP1,CDK9,HDAC1,TRIP12,SMCHD1,SAP130,HDAC7,SMARCA5,VDAC1,DNAJB1
GO:BP	negative regulation of cellular macromolecule biosynthetic process	GO:2000113	6.74215e-05	4.1712	1629	196	39	21118	HNRNPK,PSPC1,NONO,SNW1,CGGBP1,SP2,NELFA,MYBBP1A,SATB1,MEN1,CREBBP,TAF1,MCRS1,HCFC2,EP300,CTBP1,SIN3A,ATRX,CHD4,SMARCAL1,SATB2,DMAP1,PRDM2,KDM5A,MTA1,MTA2,PABPC1,NCL,RBM15,SFPQ,MORC2A,RPL23,BAP1,HDAC1,SMCHD1,SAP130,HDAC7,SMARCA5,DNAJB1
GO:BP	regulation of histone methylation	GO:0031060	7.65312e-05	4.11616	77	196	9	21118	SNW1,NELFA,MEN1,KMT2A,ATRX,PAXIP1,BRD4,WDR5,LMNA
GO:BP	nuclear transport	GO:0051169	8.14798e-05	4.08895	314	196	16	21118	PABPN1,JUP,EP300,DMAP1,PARK7,ALKBH5,ZC3H11A,FYTTD1,POLDIP3,LMNA,KPNA2,SFN,KPNB1,NUP205,NUP153,WIPF1
GO:BP	nucleocytoplasmic transport	GO:0006913	8.14798e-05	4.08895	314	196	16	21118	PABPN1,JUP,EP300,DMAP1,PARK7,ALKBH5,ZC3H11A,FYTTD1,POLDIP3,LMNA,KPNA2,SFN,KPNB1,NUP205,NUP153,WIPF1
GO:BP	negative regulation of macromolecule biosynthetic process	GO:0010558	8.47532e-05	4.07184	1643	196	39	21118	HNRNPK,PSPC1,NONO,SNW1,CGGBP1,SP2,NELFA,MYBBP1A,SATB1,MEN1,CREBBP,TAF1,MCRS1,HCFC2,EP300,CTBP1,SIN3A,ATRX,CHD4,SMARCAL1,SATB2,DMAP1,PRDM2,KDM5A,MTA1,MTA2,PABPC1,NCL,RBM15,SFPQ,MORC2A,RPL23,BAP1,HDAC1,SMCHD1,SAP130,HDAC7,SMARCA5,DNAJB1
GO:BP	RNA splicing	GO:0008380	9.50867e-05	4.02188	406	196	18	21118	HNRNPK,CDC5L,PSPC1,RALY,NONO,SNW1,CRNKL1,WBP11,PABPC1,SRSF5,NCL,AQR,ZC3H13,ACIN1,TRA2A,RBM15,SFPQ,WTAP
GO:BP	negative regulation of nitrogen compound metabolic process	GO:0051172	0.0001136	3.94462	2542	196	51	21118	HNRNPK,PSPC1,NONO,SNW1,CGGBP1,SP2,NELFA,CCNT1,MYBBP1A,SATB1,MEN1,CREBBP,TAF1,MCRS1,HCFC2,EP300,CTBP1,KMT2A,SIN3A,ATRX,CHD4,SATB2,TAF9,DMAP1,PRDM2,WDR5,KDM5A,MTA1,MTA2,PARK7,PABPC1,NCL,ACIN1,RBM15,SFPQ,SFN,AGAP2,MORC2A,PKP1,ANXA2,PEBP1,RPL23,BAP1,CDK9,HDAC1,TRIP12,SMCHD1,SAP130,HDAC7,SMARCA5,DNAJB1
GO:BP	negative regulation of transcription, DNA-templated	GO:0045892	0.000136182	3.86588	1400	196	35	21118	HNRNPK,PSPC1,NONO,SNW1,CGGBP1,SP2,NELFA,MYBBP1A,SATB1,MEN1,CREBBP,TAF1,HCFC2,EP300,CTBP1,SIN3A,ATRX,CHD4,SATB2,DMAP1,PRDM2,KDM5A,MTA1,MTA2,RBM15,SFPQ,MORC2A,RPL23,BAP1,HDAC1,SMCHD1,SAP130,HDAC7,SMARCA5,DNAJB1
GO:BP	negative regulation of nucleic acid-templated transcription	GO:1903507	0.000141014	3.85074	1402	196	35	21118	HNRNPK,PSPC1,NONO,SNW1,CGGBP1,SP2,NELFA,MYBBP1A,SATB1,MEN1,CREBBP,TAF1,HCFC2,EP300,CTBP1,SIN3A,ATRX,CHD4,SATB2,DMAP1,PRDM2,KDM5A,MTA1,MTA2,RBM15,SFPQ,MORC2A,RPL23,BAP1,HDAC1,SMCHD1,SAP130,HDAC7,SMARCA5,DNAJB1
GO:BP	regulation of cell cycle	GO:0051726	0.000142236	3.84699	898	196	27	21118	WIZ,RBL2,CCNT1,MEN1,CTBP1,SIN3A,ATRX,TAF6,PAXIP1,BRD4,SRSF5,SFPQ,MKI67,TPX2,NUMA1,KIF20B,NUSAP1,KIFC1,SFN,SPAST,PEBP1,PPP2R1A,RCC2,BAP1,CLIC1,ANXA1,FHL1
GO:BP	negative regulation of biosynthetic process	GO:0009890	0.000143415	3.8434	1746	196	40	21118	HNRNPK,PSPC1,NONO,SNW1,CGGBP1,SP2,NELFA,MYBBP1A,SATB1,MEN1,CREBBP,TAF1,MCRS1,HCFC2,EP300,CTBP1,SIN3A,ATRX,CHD4,SMARCAL1,SATB2,DMAP1,PRDM2,KDM5A,MTA1,MTA2,PARK7,PABPC1,NCL,RBM15,SFPQ,MORC2A,RPL23,BAP1,HDAC1,SMCHD1,SAP130,HDAC7,SMARCA5,DNAJB1
GO:BP	negative regulation of RNA biosynthetic process	GO:1902679	0.00014349	3.84318	1403	196	35	21118	HNRNPK,PSPC1,NONO,SNW1,CGGBP1,SP2,NELFA,MYBBP1A,SATB1,MEN1,CREBBP,TAF1,HCFC2,EP300,CTBP1,SIN3A,ATRX,CHD4,SATB2,DMAP1,PRDM2,KDM5A,MTA1,MTA2,RBM15,SFPQ,MORC2A,RPL23,BAP1,HDAC1,SMCHD1,SAP130,HDAC7,SMARCA5,DNAJB1
GO:BP	protein metabolic process	GO:0019538	0.000152212	3.81755	5474	196	85	21118	SNW1,NELFA,CCNT1,SATB1,MED12,MEN1,CREBBP,KANSL1,TAF1,MCRS1,KANSL3,EP300,SETD1A,CTBP1,KMT2A,SIN3A,ATRX,TAF6,PAXIP1,KANSL2,RBBP5,EPC2,EP400,TAF9,CXXC1,BRD4,DMAP1,ASH2L,PRDM2,WDR5,KDM5A,MTA1,MTA2,ADNP,PRDX4,PARK7,WBP11,PABPC1,NCL,POLDIP3,SFPQ,VIM,LMNA,TPX2,TCOF1,SFN,AGAP2,EIF4G2,PGAM5,RPUSD4,CBLL1,LCK,RAC2,TWF1,PPP1CA,TRIM33,ANXA2,PEBP1,CSNK1A1,PSMB1,RPL27A,RPL7,RPS2,RPL6,RPL27,RPS18,RPL23,RPL32,UBA…
GO:BP	DNA conformation change	GO:0071103	0.000188406	3.72491	291	196	15	21118	SPTY2D1,HIRA,ATRX,CHD4,MTA2,ACIN1,NUSAP1,HP1BP3,MORC2A,G3BP1,HDAC1,HIST2H2BB,SMCHD1,SMARCA5,ANXA1
GO:BP	RNA splicing, via transesterification reactions	GO:0000375	0.000197008	3.70552	292	196	15	21118	HNRNPK,CDC5L,PSPC1,NONO,SNW1,CRNKL1,WBP11,SRSF5,NCL,AQR,ACIN1,TRA2A,RBM15,SFPQ,WTAP
GO:BP	RNA splicing, via transesterification reactions with bulged adenosine as nucleophile	GO:0000377	0.000197008	3.70552	292	196	15	21118	HNRNPK,CDC5L,PSPC1,NONO,SNW1,CRNKL1,WBP11,SRSF5,NCL,AQR,ACIN1,TRA2A,RBM15,SFPQ,WTAP
GO:BP	mRNA splicing, via spliceosome	GO:0000398	0.000197008	3.70552	292	196	15	21118	HNRNPK,CDC5L,PSPC1,NONO,SNW1,CRNKL1,WBP11,SRSF5,NCL,AQR,ACIN1,TRA2A,RBM15,SFPQ,WTAP
GO:BP	negative regulation of cellular biosynthetic process	GO:0031327	0.00021862	3.66031	1703	196	39	21118	HNRNPK,PSPC1,NONO,SNW1,CGGBP1,SP2,NELFA,MYBBP1A,SATB1,MEN1,CREBBP,TAF1,MCRS1,HCFC2,EP300,CTBP1,SIN3A,ATRX,CHD4,SMARCAL1,SATB2,DMAP1,PRDM2,KDM5A,MTA1,MTA2,PABPC1,NCL,RBM15,SFPQ,MORC2A,RPL23,BAP1,HDAC1,SMCHD1,SAP130,HDAC7,SMARCA5,DNAJB1
GO:BP	negative regulation of transcription by RNA polymerase II	GO:0000122	0.000293675	3.53213	931	196	27	21118	HNRNPK,SNW1,CGGBP1,SP2,SATB1,MEN1,CREBBP,TAF1,HCFC2,EP300,CTBP1,SIN3A,ATRX,CHD4,SATB2,DMAP1,PRDM2,KDM5A,MTA1,MTA2,RBM15,SFPQ,RPL23,HDAC1,SAP130,HDAC7,DNAJB1
GO:BP	mitotic cell cycle	GO:0000278	0.000341724	3.46632	819	196	25	21118	CDC5L,RBL2,MEN1,SIN3A,ATRX,BRD4,MKI67,TUBGCP6,TPX2,KIFC5B,NUMA1,TUBGCP3,KIF20B,TUBGCP2,NUSAP1,KIFC1,SPAST,KPNB1,NUP153,PEBP1,PPP2R1A,RCC2,RPL24,ANXA1,FHL1
GO:BP	histone H4-K5 acetylation	GO:0043981	0.000350434	3.45539	15	196	5	21118	KANSL1,MCRS1,KANSL3,KANSL2,WDR5
GO:BP	histone H4-K8 acetylation	GO:0043982	0.000350434	3.45539	15	196	5	21118	KANSL1,MCRS1,KANSL3,KANSL2,WDR5
GO:BP	translation	GO:0006412	0.000418659	3.37814	657	196	22	21118	EP300,PABPC1,NCL,POLDIP3,VIM,TCOF1,EIF4G2,RPUSD4,PPP1CA,RPL27A,RPL7,RPS2,RPL6,RPL27,RPS18,RPL23,RPL32,UBA52,RPL36A,RPS9,RPL24,RPL17
GO:BP	protein deacetylation	GO:0006476	0.000577991	3.23808	97	196	9	21118	EP300,CTBP1,SIN3A,KDM5A,MTA1,MTA2,SFPQ,HDAC1,HDAC7
GO:BP	peptide biosynthetic process	GO:0043043	0.000696644	3.15699	677	196	22	21118	EP300,PABPC1,NCL,POLDIP3,VIM,TCOF1,EIF4G2,RPUSD4,PPP1CA,RPL27A,RPL7,RPS2,RPL6,RPL27,RPS18,RPL23,RPL32,UBA52,RPL36A,RPS9,RPL24,RPL17
GO:BP	DNA packaging	GO:0006323	0.000925116	3.0338	204	196	12	21118	SPTY2D1,HIRA,ATRX,MTA2,ACIN1,NUSAP1,HP1BP3,MORC2A,HDAC1,HIST2H2BB,SMCHD1,SMARCA5
GO:BP	regulation of cellular process	GO:0050794	0.00093753	3.02801	12140	196	146	21118	HNRNPK,CDC5L,PSPC1,PABPN1,RALY,NONO,SNW1,ZNF48,CGGBP1,SP2,SPTY2D1,SLTM,JUP,NCOA5,ATXN2L,WIZ,SKAP1,RBL2,NELFA,CCNT1,MYBBP1A,SATB1,MED12,MEN1,CREBBP,TAF1,MCRS1,HCFC2,KANSL3,EP300,SETD1A,CTBP1,KMT2A,SIN3A,HIRA,ATRX,TAF6,VPS72,PAXIP1,CHD4,MED23,SMARCAL1,EMSY,EPC2,DIDO1,SATB2,TAF9,MED4,CXXC1,BRD4,DMAP1,KLF13,ASH2L,PRDM2,WDR5,KDM5A,MTA1,MTA2,ADNP,PRDX4,PARK7,PRDX1,WBP11,PABPC1,RBM26,ALKBH5,SRSF5,NCL,ZC…
GO:BP	cytoskeleton organization	GO:0007010	0.00110611	2.9562	1390	196	33	21118	EP300,ATRX,SUN2,VIM,LMNA,TUBGCP6,TPX2,KIFC5B,NUMA1,TUBGCP3,TUBGCP2,NUSAP1,KIFC1,AGAP2,SPAST,KPNB1,PKP1,ACTN1,CAPZA1,EVL,ARPC3,VASP,RAC2,SPECC1L,WIPF1,WASL,TWF1,CSNK1A1,MARK3,PPP2R1A,MARK2,HSP90B1,ANXA1
GO:BP	histone deacetylation	GO:0016575	0.00111678	2.95203	77	196	8	21118	CTBP1,SIN3A,KDM5A,MTA1,MTA2,SFPQ,HDAC1,HDAC7
GO:BP	cellular component assembly	GO:0022607	0.00118513	2.92623	2739	196	51	21118	SPTY2D1,JUP,ATXN2L,SKAP1,TAF1,EP300,KMT2A,HIRA,ATRX,TAF9,ADNP,PARK7,CRNKL1,TUBGCP6,TPX2,KIFC5B,NUMA1,TUBGCP3,TUBGCP2,KIFC1,HP1BP3,MORC2A,SPAST,KPNB1,PKP1,G3BP1,NUP205,NUP153,ACTN1,CAPZA1,EVL,ARPC3,VASP,RAC2,WASL,TWF1,ANXA2,RPS2,RPL6,PPP2R1A,RCC2,RPL24,PRRC2C,HDAC1,HIST2H2BB,SMCHD1,HDAC7,SMARCA5,ALDOA,HSP90B1,DNAJB1
GO:BP	protein deacylation	GO:0035601	0.00133895	2.87324	107	196	9	21118	EP300,CTBP1,SIN3A,KDM5A,MTA1,MTA2,SFPQ,HDAC1,HDAC7
GO:BP	regulation of cell cycle process	GO:0010564	0.00161318	2.79232	599	196	20	21118	WIZ,RBL2,MEN1,SIN3A,ATRX,PAXIP1,BRD4,SFPQ,MKI67,TPX2,NUMA1,KIF20B,NUSAP1,KIFC1,SPAST,PEBP1,PPP2R1A,RCC2,ANXA1,FHL1
GO:BP	cell cycle process	GO:0022402	0.00168467	2.77349	1082	196	28	21118	WIZ,RBL2,MEN1,SIN3A,ATRX,PAXIP1,BRD4,SFPQ,MKI67,LMNA,TUBGCP6,TPX2,KIFC5B,NUMA1,TUBGCP3,KIF20B,TUBGCP2,NUSAP1,KIFC1,SPAST,KPNB1,WASL,PEBP1,PPP2R1A,RCC2,RPL24,ANXA1,FHL1
GO:BP	positive regulation of histone H3-K4 methylation	GO:0051571	0.0017422	2.7589	20	196	5	21118	SNW1,NELFA,KMT2A,PAXIP1,WDR5
GO:BP	peptide metabolic process	GO:0006518	0.00179918	2.74492	835	196	24	21118	EP300,PARK7,PABPC1,NCL,POLDIP3,VIM,TCOF1,EIF4G2,RPUSD4,PPP1CA,RPL27A,RPL7,RPS2,RPL6,RPL27,RPS18,RPL23,RPL32,UBA52,RPL36A,RPS9,RPL24,RPL17,CLIC1
GO:BP	spindle organization	GO:0007051	0.00182399	2.73898	179	196	11	21118	ATRX,TUBGCP6,TPX2,KIFC5B,NUMA1,TUBGCP3,TUBGCP2,KIFC1,SPAST,KPNB1,PPP2R1A
GO:BP	macromolecule deacylation	GO:0098732	0.0018278	2.73807	111	196	9	21118	EP300,CTBP1,SIN3A,KDM5A,MTA1,MTA2,SFPQ,HDAC1,HDAC7
GO:BP	protein-containing complex subunit organization	GO:0043933	0.00191123	2.71869	1636	196	36	21118	SPTY2D1,SKAP1,TAF1,EP300,KMT2A,HIRA,ATRX,VPS72,TAF9,DMAP1,PARK7,CRNKL1,TUBGCP6,TPX2,NUMA1,TUBGCP3,TUBGCP2,HP1BP3,SPAST,NUP205,NUP153,CAPZA1,EVL,ARPC3,VASP,SPECC1L,WASL,TWF1,RPS2,RPL6,RPL23,PPP2R1A,RPL24,HIST2H2BB,SMARCA5,ALDOA
GO:BP	positive regulation of cell cycle process	GO:0090068	0.00249227	2.60341	224	196	12	21118	WIZ,SIN3A,ATRX,BRD4,SFPQ,NUMA1,KIF20B,NUSAP1,SPAST,PEBP1,RCC2,ANXA1
GO:BP	supramolecular fiber organization	GO:0097435	0.00267635	2.57246	734	196	22	21118	EP300,VIM,TUBGCP6,TPX2,NUMA1,TUBGCP3,TUBGCP2,SPAST,KPNB1,PKP1,ACTN1,CAPZA1,EVL,ARPC3,VASP,RAC2,SPECC1L,WIPF1,WASL,TWF1,ANXA2,HSP90B1
GO:BP	mitotic nuclear division	GO:0140014	0.00296286	2.52829	270	196	13	21118	ATRX,MKI67,TPX2,KIFC5B,NUMA1,KIF20B,NUSAP1,KIFC1,SPAST,KPNB1,PEBP1,PPP2R1A,RPL24
GO:BP	regulation of biological process	GO:0050789	0.00319144	2.49601	12686	196	149	21118	HNRNPK,CDC5L,PSPC1,PABPN1,RALY,NONO,SNW1,ZNF48,CGGBP1,SP2,SPTY2D1,SLTM,JUP,NCOA5,ATXN2L,WIZ,SKAP1,RBL2,NELFA,CCNT1,MYBBP1A,SATB1,MED12,MEN1,CREBBP,TAF1,MCRS1,HCFC2,KANSL3,EP300,SETD1A,CTBP1,KMT2A,SIN3A,HIRA,ATRX,TAF6,VPS72,PAXIP1,CHD4,MED23,SMARCAL1,EMSY,EPC2,DIDO1,SATB2,TAF9,MED4,CXXC1,BRD4,DMAP1,KLF13,ASH2L,PRDM2,WDR5,KDM5A,MTA1,MTA2,ADNP,PRDX4,PARK7,PRDX1,WBP11,PABPC1,RBM26,ALKBH5,SRSF5,NCL,ZC…
GO:BP	cellular protein-containing complex assembly	GO:0034622	0.00368223	2.43389	996	196	26	21118	SPTY2D1,TAF1,EP300,HIRA,ATRX,TAF9,CRNKL1,TUBGCP6,TPX2,NUMA1,TUBGCP3,TUBGCP2,HP1BP3,NUP205,NUP153,CAPZA1,EVL,ARPC3,VASP,WASL,TWF1,RPS2,RPL6,RPL24,HIST2H2BB,SMARCA5
GO:BP	regulation of mRNA metabolic process	GO:1903311	0.00479338	2.31936	282	196	13	21118	HNRNPK,SNW1,SLTM,CCNT1,PABPC1,ALKBH5,NCL,ACIN1,RBM15,WTAP,VIM,PKP1,CDK9
GO:BP	regulation of gene expression, epigenetic	GO:0040029	0.00493804	2.30645	160	196	10	21118	CGGBP1,EP300,SETD1A,CTBP1,SIN3A,ASH2L,MTA1,RBM15,MORC2A,SMCHD1
GO:BP	lactate biosynthetic process	GO:0019249	0.00601541	2.22074	4	196	3	21118	PARK7,LDHA,LDHB
GO:BP	organonitrogen compound metabolic process	GO:1901564	0.00629678	2.20088	6326	196	89	21118	SNW1,NELFA,CCNT1,SATB1,MED12,MEN1,CREBBP,KANSL1,TAF1,MCRS1,KANSL3,EP300,SETD1A,CTBP1,KMT2A,SIN3A,ATRX,TAF6,PAXIP1,KANSL2,RBBP5,EPC2,EP400,TAF9,CXXC1,BRD4,DMAP1,ASH2L,PRDM2,WDR5,KDM5A,MTA1,MTA2,ADNP,PRDX4,PARK7,WBP11,PABPC1,NCL,POLDIP3,SFPQ,VIM,LMNA,TPX2,TCOF1,SFN,AGAP2,EIF4G2,PGAM5,RPUSD4,CBLL1,LCK,RAC2,TWF1,PPP1CA,TRIM33,ANXA2,PEBP1,CSNK1A1,PSMB1,RPL27A,RPL7,RPS2,RPL6,RPL27,RPS18,RPL23,RPL32,UBA…
GO:BP	rhythmic process	GO:0048511	0.00730299	2.1365	340	196	14	21118	PSPC1,NONO,MYBBP1A,CREBBP,EP300,KMT2A,SIN3A,KDM5A,MTA1,ADNP,SFPQ,PPP1CA,HDAC1,ANXA1
GO:BP	regulation of peptidyl-lysine acetylation	GO:2000756	0.00749452	2.12526	70	196	7	21118	EP300,CTBP1,KMT2A,SIN3A,PAXIP1,PARK7,HDAC1
GO:BP	amide biosynthetic process	GO:0043604	0.00932808	2.03021	793	196	22	21118	EP300,PABPC1,NCL,POLDIP3,VIM,TCOF1,EIF4G2,RPUSD4,PPP1CA,RPL27A,RPL7,RPS2,RPL6,RPL27,RPS18,RPL23,RPL32,UBA52,RPL36A,RPS9,RPL24,RPL17
GO:BP	protein-containing complex assembly	GO:0065003	0.00942636	2.02566	1462	196	32	21118	SPTY2D1,SKAP1,TAF1,EP300,KMT2A,HIRA,ATRX,TAF9,PARK7,CRNKL1,TUBGCP6,TPX2,NUMA1,TUBGCP3,TUBGCP2,HP1BP3,SPAST,NUP205,NUP153,CAPZA1,EVL,ARPC3,VASP,WASL,TWF1,RPS2,RPL6,PPP2R1A,RPL24,HIST2H2BB,SMARCA5,ALDOA
GO:BP	protein-DNA complex subunit organization	GO:0071824	0.0128883	1.8898	219	196	11	21118	SPTY2D1,TAF1,EP300,HIRA,ATRX,VPS72,DMAP1,HP1BP3,RPL23,HIST2H2BB,SMARCA5
GO:BP	regulation of cellular protein metabolic process	GO:0032268	0.0134484	1.87133	2482	196	45	21118	SNW1,NELFA,CCNT1,MEN1,TAF1,EP300,CTBP1,KMT2A,SIN3A,ATRX,PAXIP1,TAF9,BRD4,WDR5,KDM5A,MTA1,ADNP,PARK7,WBP11,PABPC1,NCL,POLDIP3,VIM,LMNA,TPX2,TCOF1,SFN,AGAP2,EIF4G2,RPUSD4,LCK,RAC2,TWF1,PPP1CA,ANXA2,PEBP1,CSNK1A1,RPS2,RPL23,RPS9,PPP2R1A,CDK9,HDAC1,TRIP12,HSP90B1
GO:BP	positive regulation of cell cycle	GO:0045787	0.0148948	1.82696	313	196	13	21118	WIZ,CCNT1,SIN3A,ATRX,BRD4,SFPQ,NUMA1,KIF20B,NUSAP1,SPAST,PEBP1,RCC2,ANXA1
GO:BP	regulation of protein modification process	GO:0031399	0.0149012	1.82678	1641	196	34	21118	SNW1,NELFA,CCNT1,MEN1,TAF1,EP300,CTBP1,KMT2A,SIN3A,ATRX,PAXIP1,BRD4,WDR5,KDM5A,MTA1,ADNP,PARK7,WBP11,LMNA,TPX2,SFN,AGAP2,LCK,RAC2,TWF1,ANXA2,PEBP1,RPS2,RPL23,PPP2R1A,CDK9,HDAC1,TRIP12,HSP90B1
GO:BP	regulation of mRNA processing	GO:0050684	0.016725	1.77663	145	196	9	21118	HNRNPK,SNW1,SLTM,CCNT1,NCL,ACIN1,RBM15,WTAP,CDK9
GO:BP	spindle assembly	GO:0051225	0.0179111	1.74688	111	196	8	21118	TUBGCP6,TPX2,KIFC5B,NUMA1,TUBGCP3,TUBGCP2,KIFC1,KPNB1
GO:BP	cellular response to stress	GO:0033554	0.0179284	1.74646	1805	196	36	21118	HNRNPK,CDC5L,NONO,SNW1,NFRKB,MYBBP1A,MEN1,TAF1,MCRS1,EP300,SIN3A,ATRX,PAXIP1,SMARCAL1,EMSY,RBBP5,EPC2,DMAP1,ASH2L,MTA1,PARK7,PRDX1,SFPQ,LMNA,MCM10,SFN,HP1BP3,MORC2A,CDK9,HDAC1,TRIP12,SMCHD1,HSP90B1,TNC,DNAJB1,ANXA1
GO:BP	regulation of protein acetylation	GO:1901983	0.019948	1.7001	81	196	7	21118	EP300,CTBP1,KMT2A,SIN3A,PAXIP1,PARK7,HDAC1
GO:BP	circadian rhythm	GO:0007623	0.0222152	1.65335	232	196	11	21118	PSPC1,NONO,MYBBP1A,EP300,KMT2A,SIN3A,KDM5A,MTA1,SFPQ,PPP1CA,HDAC1
GO:BP	regulation of histone H3-K4 methylation	GO:0051569	0.02418	1.61654	33	196	5	21118	SNW1,NELFA,KMT2A,PAXIP1,WDR5
GO:BP	nuclear export	GO:0051168	0.0271774	1.56579	154	196	9	21118	PABPN1,PARK7,ALKBH5,ZC3H11A,FYTTD1,POLDIP3,SFN,NUP153,WIPF1
GO:BP	DNA repair	GO:0006281	0.0279223	1.55405	490	196	16	21118	CDC5L,NONO,NFRKB,MCRS1,ATRX,PAXIP1,SMARCAL1,EMSY,EPC2,DMAP1,MTA1,PARK7,SFPQ,CDK9,TRIP12,SMCHD1
GO:BP	chromatin assembly	GO:0031497	0.0286242	1.54327	155	196	9	21118	SPTY2D1,HIRA,ATRX,HP1BP3,MORC2A,HDAC1,HIST2H2BB,SMCHD1,SMARCA5
GO:BP	mitotic cell cycle process	GO:1903047	0.0291986	1.53464	666	196	19	21118	RBL2,SIN3A,ATRX,BRD4,MKI67,TPX2,KIFC5B,NUMA1,KIF20B,NUSAP1,KIFC1,SPAST,KPNB1,PEBP1,PPP2R1A,RCC2,RPL24,ANXA1,FHL1
GO:BP	circadian regulation of gene expression	GO:0032922	0.0375746	1.42511	60	196	6	21118	MYBBP1A,KMT2A,KDM5A,MTA1,PPP1CA,HDAC1
GO:BP	regulation of histone acetylation	GO:0035065	0.0375746	1.42511	60	196	6	21118	EP300,CTBP1,KMT2A,SIN3A,PAXIP1,PARK7
GO:BP	DNA-templated transcription, initiation	GO:0006352	0.0380035	1.42018	123	196	8	21118	TAF5,MED12,TAF1,TAF6,PAXIP1,TAF9,MED4,SMARCA5
GO:BP	cellular amide metabolic process	GO:0043603	0.0441105	1.35546	1077	196	25	21118	EP300,PARK7,PABPC1,NCL,POLDIP3,VIM,TCOF1,EIF4G2,RPUSD4,PPP1CA,RPL27A,RPL7,RPS2,RPL6,RPL27,RPS18,RPL23,RPL32,UBA52,RPL36A,RPS9,RPL24,RPL17,EHHADH,CLIC1

## Sheet: GO-MF
source	term_name	term_id	adjusted_p_value	negative_log10_of_adjusted_p_value	term_size	query_size	intersection_size	effective_domain_size	intersections
GO:MF	nucleic acid binding	GO:0003676	3.94493e-18	17.404	3588	192	89	20802	HNRNPK,CDC5L,PSPC1,PABPN1,RALY,NONO,ZNF48,CGGBP1,POLR2B,SP2,SPTY2D1,SLTM,ATXN2L,WIZ,NFRKB,RBL2,CCNT1,MYBBP1A,SATB1,MED12,MEN1,CREBBP,TAF1,MCRS1,EP300,SETD1A,KMT2A,SIN3A,ATRX,TAF6,VPS72,CHD4,SMARCAL1,RBBP5,EP400,SATB2,TAF9,CXXC1,BRD4,KLF13,ASH2L,PRDM2,KDM5A,MTA1,MTA2,ADNP,PARK7,CRNKL1,PABPC1,RBM26,ZC3H11A,SRSF5,NCL,AQR,FYTTD1,ACIN1,TRA2A,RBM15,POLDIP3,SFPQ,TMPO,MKI67,VIM,MCM10,NUSAP1,HP1BP3,ISG20L…
GO:MF	protein binding	GO:0005515	7.19385e-16	15.143	10189	192	153	20802	HNRNPK,CDC5L,PSPC1,PABPN1,RALY,NONO,SNW1,ZNF48,CGGBP1,SP2,SPTY2D1,JUP,WIZ,SKAP1,NFRKB,RBL2,NELFA,TAF5,CCNT1,MYBBP1A,SATB1,MED12,MEN1,CREBBP,KANSL1,TAF1,MCRS1,HCFC2,EP300,SETD1A,CTBP1,KMT2A,SIN3A,HIRA,ATRX,TAF6,VPS72,PAXIP1,CHD4,EMSY,RBBP5,EP400,SATB2,TAF9,MED4,CXXC1,BRD4,DMAP1,ASH2L,PRDM2,WDR5,KDM5A,MTA1,MTA2,ADNP,PRDX4,PARK7,PRDX1,CRNKL1,WBP11,PABPC1,SRSF5,NCL,RBM15,SFPQ,WTAP,TMPO,SUN2,MKI67,VIM…
GO:MF	heterocyclic compound binding	GO:1901363	3.50826e-15	14.4549	5672	192	109	20802	HNRNPK,CDC5L,PSPC1,PABPN1,RALY,NONO,ZNF48,CGGBP1,POLR2B,SP2,SPTY2D1,SLTM,ATXN2L,WIZ,NFRKB,RBL2,CCNT1,MYBBP1A,SATB1,MED12,MEN1,CREBBP,TAF1,MCRS1,EP300,SETD1A,CTBP1,KMT2A,SIN3A,ATRX,TAF6,VPS72,CHD4,SMARCAL1,RBBP5,EP400,SATB2,TAF9,CXXC1,BRD4,KLF13,ASH2L,PRDM2,KDM5A,MTA1,MTA2,ADNP,PARK7,PRDX1,CRNKL1,PABPC1,RBM26,ZC3H11A,SRSF5,NCL,AQR,FYTTD1,ACIN1,TRA2A,RBM15,POLDIP3,SFPQ,TMPO,MKI67,VIM,KIFC5B,MCM10,K…
GO:MF	chromatin binding	GO:0003682	9.47676e-15	14.0233	600	192	34	20802	NONO,POLR2B,NCOA5,RBL2,NELFA,CCNT1,SATB1,MED12,MEN1,CREBBP,TAF1,EP300,CTBP1,KMT2A,SIN3A,HIRA,ATRX,EP400,SATB2,BRD4,KDM5A,MTA1,MTA2,ADNP,SFPQ,HP1BP3,PWWP2A,MORC2A,NUP153,BAP1,CDK9,HDAC1,HDAC7,SMARCA5
GO:MF	organic cyclic compound binding	GO:0097159	1.32145e-14	13.8789	5768	192	109	20802	HNRNPK,CDC5L,PSPC1,PABPN1,RALY,NONO,ZNF48,CGGBP1,POLR2B,SP2,SPTY2D1,SLTM,ATXN2L,WIZ,NFRKB,RBL2,CCNT1,MYBBP1A,SATB1,MED12,MEN1,CREBBP,TAF1,MCRS1,EP300,SETD1A,CTBP1,KMT2A,SIN3A,ATRX,TAF6,VPS72,CHD4,SMARCAL1,RBBP5,EP400,SATB2,TAF9,CXXC1,BRD4,KLF13,ASH2L,PRDM2,KDM5A,MTA1,MTA2,ADNP,PARK7,PRDX1,CRNKL1,PABPC1,RBM26,ZC3H11A,SRSF5,NCL,AQR,FYTTD1,ACIN1,TRA2A,RBM15,POLDIP3,SFPQ,TMPO,MKI67,VIM,KIFC5B,MCM10,K…
GO:MF	binding	GO:0005488	4.45255e-12	11.3514	14895	192	180	20802	HNRNPK,CDC5L,PSPC1,PABPN1,RALY,NONO,SNW1,ZNF48,CGGBP1,POLR2B,SP2,SPTY2D1,SLTM,JUP,NCOA5,ATXN2L,WIZ,SKAP1,NFRKB,RBL2,NELFA,TAF5,CCNT1,MYBBP1A,SATB1,MED12,MEN1,CREBBP,KANSL1,TAF1,MCRS1,HCFC2,EP300,SETD1A,CTBP1,KMT2A,SIN3A,HIRA,ATRX,TAF6,VPS72,PAXIP1,CHD4,SMARCAL1,EMSY,RBBP5,DIDO1,EP400,SATB2,TAF9,MED4,CXXC1,BRD4,DMAP1,KLF13,ASH2L,PRDM2,WDR5,KDM5A,MTA1,MTA2,ADNP,PRDX4,PARK7,PRDX1,CRNKL1,WBP11,PABPC1…
GO:MF	RNA binding	GO:0003723	1.66457e-10	9.7787	1267	192	42	20802	HNRNPK,CDC5L,PSPC1,PABPN1,RALY,NONO,SLTM,ATXN2L,CCNT1,MCRS1,EP300,SETD1A,SIN3A,PARK7,CRNKL1,PABPC1,RBM26,ZC3H11A,SRSF5,NCL,AQR,FYTTD1,TRA2A,RBM15,POLDIP3,SFPQ,VIM,EIF4G2,RPUSD4,G3BP1,ACTN1,RPL7A,RPL7,RPS2,RPL6,RPS18,RPL23,RPS9,RPL24,CDK9,HSP90B1,ANXA1
GO:MF	enzyme binding	GO:0019899	2.35074e-10	9.62879	2164	192	56	20802	HNRNPK,CDC5L,PABPN1,SNW1,SP2,SPTY2D1,JUP,WIZ,SKAP1,NFRKB,CCNT1,KANSL1,EP300,CHD4,SATB2,TAF9,BRD4,MTA1,MTA2,PARK7,SRSF5,NCL,SFPQ,VIM,ANXA5,LMNA,TPX2,KPNA2,MCM10,SFN,AGAP2,KPNB1,NUP153,LCK,RAC2,TPRN,PPP1CA,ANXA2,PEBP1,RPS2,RPS18,RPL23,UBA52,RCC2,EHHADH,CDK9,HDAC1,HDAC7,ALDOA,LDHA,HSP90B1,LDHB,PPIB,GLUD1,VDAC1,DNAJB1
GO:MF	DNA binding	GO:0003677	2.87718e-09	8.54103	2372	192	57	20802	HNRNPK,CDC5L,PSPC1,NONO,ZNF48,CGGBP1,POLR2B,SP2,SPTY2D1,SLTM,WIZ,NFRKB,RBL2,CCNT1,MYBBP1A,SATB1,MED12,MEN1,CREBBP,TAF1,EP300,KMT2A,SIN3A,ATRX,TAF6,VPS72,CHD4,RBBP5,EP400,SATB2,TAF9,CXXC1,BRD4,KLF13,ASH2L,PRDM2,KDM5A,MTA1,MTA2,ADNP,NCL,SFPQ,TMPO,MKI67,MCM10,NUSAP1,HP1BP3,G3BP1,NUP153,TRIM33,RPL7,CDK9,HDAC1,HIST2H2BB,SMCHD1,SMARCA5,ANXA1
GO:MF	transcription coregulator activity	GO:0003712	1.74515e-08	7.75817	448	192	23	20802	RALY,SNW1,JUP,MYBBP1A,MED12,CREBBP,HCFC2,EP300,CTBP1,SIN3A,TAF6,TAF9,MED4,BRD4,DMAP1,KDM5A,MTA1,MTA2,PARK7,ACTN1,HDAC1,HDAC7,DNAJB1
GO:MF	transcription factor binding	GO:0008134	3.75584e-07	6.42529	571	192	24	20802	HNRNPK,CDC5L,SNW1,CGGBP1,CCNT1,MYBBP1A,SATB1,MED12,CREBBP,TAF1,EP300,SETD1A,CTBP1,SIN3A,TAF6,CHD4,MED4,MTA2,PARK7,RPL23,CDK9,HDAC1,TRIP12,HDAC7
GO:MF	structural constituent of ribosome	GO:0003735	4.4634e-06	5.35033	172	192	13	20802	RPL27A,RPL7,RPS2,RPL6,RPL27,RPS18,RPL23,RPL32,UBA52,RPL36A,RPS9,RPL24,RPL17
GO:MF	transcription coactivator activity	GO:0003713	5.14622e-06	5.28851	244	192	15	20802	SNW1,JUP,MED12,CREBBP,HCFC2,EP300,SIN3A,TAF6,TAF9,MED4,KDM5A,MTA1,MTA2,PARK7,ACTN1
GO:MF	histone methyltransferase activity (H3-K4 specific)	GO:0042800	8.25747e-06	5.08315	19	192	6	20802	SETD1A,KMT2A,RBBP5,CXXC1,ASH2L,WDR5
GO:MF	histone binding	GO:0042393	3.06863e-05	4.51306	279	192	15	20802	SPTY2D1,TAF1,KMT2A,HIRA,ATRX,VPS72,RBBP5,CXXC1,BRD4,WDR5,KDM5A,NCL,PWWP2A,MORC2A,SMARCA5
GO:MF	histone methyltransferase activity	GO:0042054	3.96954e-05	4.40126	59	192	8	20802	MEN1,SETD1A,KMT2A,RBBP5,CXXC1,ASH2L,PRDM2,WDR5
GO:MF	histone-lysine N-methyltransferase activity	GO:0018024	0.000118774	3.92528	46	192	7	20802	MEN1,SETD1A,KMT2A,RBBP5,CXXC1,ASH2L,WDR5
GO:MF	transcription corepressor activity	GO:0003714	0.000280213	3.55251	168	192	11	20802	SNW1,MYBBP1A,CREBBP,CTBP1,SIN3A,DMAP1,MTA1,MTA2,HDAC1,HDAC7,DNAJB1
GO:MF	DNA-binding transcription factor binding	GO:0140297	0.000357475	3.44675	250	192	13	20802	SNW1,CGGBP1,SATB1,MED12,CREBBP,TAF1,EP300,TAF6,MED4,MTA2,PARK7,HDAC1,TRIP12
GO:MF	structural molecule activity	GO:0005198	0.000624285	3.20462	612	192	20	20802	JUP,VIM,NUP205,NUP153,ACTN1,ARPC3,RPL27A,RPL7,RPS2,RPL6,RPL27,RPS18,RPL23,RPL32,UBA52,RPL36A,RPS9,RPL24,RPL17,TNC
GO:MF	lysine N-methyltransferase activity	GO:0016278	0.000861423	3.06478	61	192	7	20802	MEN1,SETD1A,KMT2A,RBBP5,CXXC1,ASH2L,WDR5
GO:MF	protein-lysine N-methyltransferase activity	GO:0016279	0.000861423	3.06478	61	192	7	20802	MEN1,SETD1A,KMT2A,RBBP5,CXXC1,ASH2L,WDR5
GO:MF	protein methyltransferase activity	GO:0008276	0.00118287	2.92706	91	192	8	20802	MEN1,SETD1A,KMT2A,RBBP5,CXXC1,ASH2L,PRDM2,WDR5
GO:MF	protein antigen binding	GO:1990405	0.001298	2.88673	11	192	4	20802	EP300,EP400,LCK,PPP2R1A
GO:MF	rRNA binding	GO:0019843	0.00200183	2.69857	69	192	7	20802	NCL,RPUSD4,RPL7,RPL6,RPS18,RPL23,RPS9
GO:MF	protein domain specific binding	GO:0019904	0.00224087	2.64958	786	192	22	20802	HNRNPK,CDC5L,WIZ,SKAP1,MED12,CTBP1,ATRX,TAF9,WBP11,SRSF5,VIM,NUMA1,KIF20B,KPNB1,ACTN1,LCK,EVL,VASP,WIPF1,INPP5D,RCC2,HDAC1
GO:MF	microtubule minus-end binding	GO:0051011	0.00277188	2.55723	13	192	4	20802	TUBGCP6,NUMA1,TUBGCP3,TUBGCP2
GO:MF	cytoskeletal protein binding	GO:0008092	0.00284175	2.54641	989	192	25	20802	HNRNPK,ADNP,TUBGCP6,TPX2,KIFC5B,NUMA1,TUBGCP3,KIF20B,GTSE1,TUBGCP2,NUSAP1,KIFC1,SPAST,KPNB1,ACTN1,CAPZA1,EVL,ARPC3,VASP,WIPF1,WASL,TWF1,ANXA2,RCC2,ALDOA
GO:MF	microtubule binding	GO:0008017	0.00334973	2.47499	260	192	12	20802	TUBGCP6,TPX2,KIFC5B,NUMA1,TUBGCP3,KIF20B,GTSE1,TUBGCP2,NUSAP1,KIFC1,SPAST,RCC2
GO:MF	kinase binding	GO:0019900	0.00438568	2.35796	820	192	22	20802	CDC5L,JUP,SKAP1,CCNT1,EP300,PARK7,SRSF5,VIM,ANXA5,TPX2,SFN,AGAP2,LCK,RAC2,PEBP1,RPS18,RCC2,CDK9,HDAC7,LDHA,LDHB,VDAC1
GO:MF	nucleosome-dependent ATPase activity	GO:0070615	0.00719558	2.14293	33	192	5	20802	ATRX,CHD4,SMARCAL1,EP400,SMARCA5
GO:MF	ATPase	GO:0016887	0.00859948	2.06553	550	192	17	20802	ATRX,CHD4,SMARCAL1,EP400,TAF9,AQR,ANXA5,KIFC5B,KIF20B,KIFC1,MORC2A,SPAST,G3BP1,SMCHD1,SMARCA5,HSP90B1,ANXA1
GO:MF	histone deacetylase binding	GO:0042826	0.0105078	1.97849	122	192	8	20802	SP2,CHD4,SATB2,MTA1,MTA2,SFPQ,KPNA2,HDAC1
GO:MF	sequence-specific DNA binding	GO:0043565	0.0139364	1.85585	1591	192	32	20802	HNRNPK,CDC5L,PSPC1,NONO,ZNF48,SP2,SLTM,WIZ,RBL2,CCNT1,MYBBP1A,SATB1,MED12,MEN1,TAF1,EP300,KMT2A,RBBP5,SATB2,TAF9,CXXC1,KLF13,ASH2L,PRDM2,KDM5A,MTA1,MTA2,NCL,SFPQ,MCM10,CDK9,HDAC1
GO:MF	N-methyltransferase activity	GO:0008170	0.0145896	1.83596	93	192	7	20802	MEN1,SETD1A,KMT2A,RBBP5,CXXC1,ASH2L,WDR5
GO:MF	tubulin binding	GO:0015631	0.0227904	1.64225	367	192	13	20802	ADNP,TUBGCP6,TPX2,KIFC5B,NUMA1,TUBGCP3,KIF20B,GTSE1,TUBGCP2,NUSAP1,KIFC1,SPAST,RCC2
GO:MF	histone acetyltransferase activity	GO:0004402	0.0270816	1.56733	43	192	5	20802	CREBBP,TAF1,EP300,EPC2,TAF9
GO:MF	p53 binding	GO:0002039	0.0292689	1.53359	71	192	6	20802	CREBBP,TAF1,EP300,TAF9,BRD4,HDAC1
GO:MF	protein kinase binding	GO:0019901	0.0319682	1.49528	736	192	19	20802	CDC5L,JUP,SKAP1,CCNT1,EP300,SRSF5,VIM,ANXA5,TPX2,SFN,AGAP2,LCK,RAC2,PEBP1,RPS18,RCC2,CDK9,HDAC7,VDAC1
GO:MF	peptide-lysine-N-acetyltransferase activity	GO:0061733	0.0338632	1.47027	45	192	5	20802	CREBBP,TAF1,EP300,EPC2,TAF9
GO:MF	mRNA binding	GO:0003729	0.0468925	1.3289	394	192	13	20802	HNRNPK,PARK7,PABPC1,ZC3H11A,SRSF5,NCL,AQR,FYTTD1,RBM15,G3BP1,RPL7,RPS2,RPL6

## Sheet: GO-CC
source	term_name	term_id	adjusted_p_value	negative_log10_of_adjusted_p_value	term_size	query_size	intersection_size	effective_domain_size	intersections
GO:CC	nuclear lumen	GO:0031981	3.17498e-40	39.4983	4062	198	126	21016	HNRNPK,CDC5L,PSPC1,PABPN1,NONO,SNW1,CGGBP1,POLR2B,SP2,SPTY2D1,SLTM,NCOA5,ATXN2L,WIZ,SKAP1,NFRKB,RBL2,NELFA,TAF5,CCNT1,MYBBP1A,SATB1,MED12,MEN1,CREBBP,KANSL1,TAF1,MCRS1,HCFC2,KANSL3,EP300,SETD1A,CTBP1,KMT2A,SIN3A,HIRA,ATRX,TAF6,VPS72,PAXIP1,CHD4,SMARCAL1,EMSY,KANSL2,RBBP5,EPC2,DIDO1,EP400,SATB2,TAF9,MED4,CXXC1,BRD4,DMAP1,ASH2L,PRDM2,WDR5,KDM5A,MTA1,MTA2,PARK7,PRDX1,CRNKL1,WBP11,ALKBH5,SRSF5,NCL,AQ…
GO:CC	intracellular organelle lumen	GO:0070013	1.13035e-38	37.9468	4581	198	131	21016	HNRNPK,CDC5L,PSPC1,PABPN1,NONO,SNW1,CGGBP1,POLR2B,SP2,SPTY2D1,SLTM,NCOA5,ATXN2L,WIZ,SKAP1,NFRKB,RBL2,NELFA,TAF5,CCNT1,MYBBP1A,SATB1,MED12,MEN1,CREBBP,KANSL1,TAF1,MCRS1,HCFC2,KANSL3,EP300,SETD1A,CTBP1,KMT2A,SIN3A,HIRA,ATRX,TAF6,VPS72,PAXIP1,CHD4,SMARCAL1,EMSY,KANSL2,RBBP5,EPC2,DIDO1,EP400,SATB2,TAF9,MED4,CXXC1,BRD4,DMAP1,ASH2L,PRDM2,WDR5,KDM5A,MTA1,MTA2,PARK7,PRDX1,CRNKL1,WBP11,ALKBH5,SRSF5,NCL,AQ…
GO:CC	organelle lumen	GO:0043233	1.15892e-38	37.9359	4582	198	131	21016	HNRNPK,CDC5L,PSPC1,PABPN1,NONO,SNW1,CGGBP1,POLR2B,SP2,SPTY2D1,SLTM,NCOA5,ATXN2L,WIZ,SKAP1,NFRKB,RBL2,NELFA,TAF5,CCNT1,MYBBP1A,SATB1,MED12,MEN1,CREBBP,KANSL1,TAF1,MCRS1,HCFC2,KANSL3,EP300,SETD1A,CTBP1,KMT2A,SIN3A,HIRA,ATRX,TAF6,VPS72,PAXIP1,CHD4,SMARCAL1,EMSY,KANSL2,RBBP5,EPC2,DIDO1,EP400,SATB2,TAF9,MED4,CXXC1,BRD4,DMAP1,ASH2L,PRDM2,WDR5,KDM5A,MTA1,MTA2,PARK7,PRDX1,CRNKL1,WBP11,ALKBH5,SRSF5,NCL,AQ…
GO:CC	membrane-enclosed lumen	GO:0031974	1.15892e-38	37.9359	4582	198	131	21016	HNRNPK,CDC5L,PSPC1,PABPN1,NONO,SNW1,CGGBP1,POLR2B,SP2,SPTY2D1,SLTM,NCOA5,ATXN2L,WIZ,SKAP1,NFRKB,RBL2,NELFA,TAF5,CCNT1,MYBBP1A,SATB1,MED12,MEN1,CREBBP,KANSL1,TAF1,MCRS1,HCFC2,KANSL3,EP300,SETD1A,CTBP1,KMT2A,SIN3A,HIRA,ATRX,TAF6,VPS72,PAXIP1,CHD4,SMARCAL1,EMSY,KANSL2,RBBP5,EPC2,DIDO1,EP400,SATB2,TAF9,MED4,CXXC1,BRD4,DMAP1,ASH2L,PRDM2,WDR5,KDM5A,MTA1,MTA2,PARK7,PRDX1,CRNKL1,WBP11,ALKBH5,SRSF5,NCL,AQ…
GO:CC	nucleus	GO:0005634	1.97889e-35	34.7036	7208	198	156	21016	HNRNPK,CDC5L,PSPC1,PABPN1,RALY,NONO,SNW1,ZNF48,CGGBP1,POLR2B,CCDC59,SP2,SPTY2D1,SLTM,JUP,NCOA5,ATXN2L,WIZ,SKAP1,NFRKB,RBL2,NELFA,TAF5,CCNT1,MYBBP1A,SATB1,MED12,MEN1,CREBBP,KANSL1,TAF1,MCRS1,HCFC2,KANSL3,EP300,SETD1A,CTBP1,KMT2A,SIN3A,HIRA,ATRX,TAF6,VPS72,PAXIP1,CHD4,MED23,SMARCAL1,EMSY,KANSL2,RBBP5,EPC2,DIDO1,EP400,SATB2,TAF9,MED4,CXXC1,BRD4,DMAP1,KLF13,ASH2L,PRDM2,WDR5,KDM5A,MTA1,MTA2,ADNP,PARK7…
GO:CC	nucleoplasm	GO:0005654	3.89881e-35	34.4091	3560	198	113	21016	HNRNPK,CDC5L,PSPC1,PABPN1,NONO,SNW1,CGGBP1,POLR2B,SP2,SPTY2D1,SLTM,NCOA5,ATXN2L,WIZ,SKAP1,NFRKB,RBL2,NELFA,TAF5,CCNT1,SATB1,MED12,MEN1,CREBBP,KANSL1,TAF1,MCRS1,HCFC2,KANSL3,EP300,SETD1A,CTBP1,KMT2A,SIN3A,HIRA,ATRX,TAF6,VPS72,PAXIP1,CHD4,SMARCAL1,EMSY,KANSL2,RBBP5,EPC2,DIDO1,EP400,SATB2,TAF9,MED4,CXXC1,BRD4,DMAP1,ASH2L,PRDM2,WDR5,MTA1,MTA2,PARK7,CRNKL1,WBP11,ALKBH5,SRSF5,NCL,AQR,ZC3H13,ZC3H18,FYTT…
GO:CC	nuclear protein-containing complex	GO:0140513	1.87364e-30	29.7273	1168	198	65	21016	HNRNPK,CDC5L,RALY,NONO,SNW1,POLR2B,JUP,NFRKB,NELFA,TAF5,CCNT1,MED12,MEN1,CREBBP,KANSL1,TAF1,MCRS1,HCFC2,KANSL3,EP300,SETD1A,KMT2A,SIN3A,TAF6,PAXIP1,CHD4,SMARCAL1,KANSL2,RBBP5,EPC2,EP400,SATB2,TAF9,MED4,CXXC1,BRD4,DMAP1,ASH2L,WDR5,MTA1,MTA2,ADNP,CRNKL1,WBP11,PABPC1,INTS8,ZC3H11A,NCL,AQR,ACIN1,SFPQ,SUN2,MCM10,INTS1,KPNB1,NUP205,NUP153,THEMIS,CSNK1A1,BAP1,CDK9,HDAC1,SAP130,HDAC7,SMARCA5
GO:CC	intracellular non-membrane-bounded organelle	GO:0043232	7.54371e-30	29.1224	4500	198	119	21016	HNRNPK,CDC5L,PSPC1,NONO,SNW1,POLR2B,SPTY2D1,JUP,NCOA5,ATXN2L,NFRKB,RBL2,TAF5,MYBBP1A,SATB1,MEN1,CREBBP,KANSL1,TAF1,MCRS1,EP300,SETD1A,SIN3A,HIRA,ATRX,PAXIP1,CHD4,SMARCAL1,KANSL2,RBBP5,DIDO1,EP400,SATB2,TAF9,BRD4,DMAP1,ASH2L,KDM5A,MTA1,MTA2,PARK7,PRDX1,PABPC1,SRSF5,NCL,ACIN1,TRA2A,POLDIP3,SFPQ,TMPO,SUN2,MKI67,VIM,ANXA5,LMNA,TUBGCP6,TPX2,KIFC5B,NUMA1,KPNA2,TUBGCP3,MCM10,KIF20B,GTSE1,TUBGCP2,NUSAP1,…
GO:CC	non-membrane-bounded organelle	GO:0043228	1.04956e-29	28.979	4515	198	119	21016	HNRNPK,CDC5L,PSPC1,NONO,SNW1,POLR2B,SPTY2D1,JUP,NCOA5,ATXN2L,NFRKB,RBL2,TAF5,MYBBP1A,SATB1,MEN1,CREBBP,KANSL1,TAF1,MCRS1,EP300,SETD1A,SIN3A,HIRA,ATRX,PAXIP1,CHD4,SMARCAL1,KANSL2,RBBP5,DIDO1,EP400,SATB2,TAF9,BRD4,DMAP1,ASH2L,KDM5A,MTA1,MTA2,PARK7,PRDX1,PABPC1,SRSF5,NCL,ACIN1,TRA2A,POLDIP3,SFPQ,TMPO,SUN2,MKI67,VIM,ANXA5,LMNA,TUBGCP6,TPX2,KIFC5B,NUMA1,KPNA2,TUBGCP3,MCM10,KIF20B,GTSE1,TUBGCP2,NUSAP1,…
GO:CC	intracellular organelle	GO:0043229	1.58936e-29	28.7988	12510	198	189	21016	HNRNPK,CDC5L,PSPC1,PABPN1,RALY,NONO,SNW1,ZNF48,CGGBP1,POLR2B,CCDC59,SP2,SPTY2D1,SLTM,JUP,NCOA5,ATXN2L,WIZ,SKAP1,NFRKB,RBL2,NELFA,TAF5,CCNT1,MYBBP1A,SATB1,MED12,MEN1,CREBBP,KANSL1,TAF1,MCRS1,HCFC2,KANSL3,EP300,SETD1A,CTBP1,KMT2A,SIN3A,HIRA,ATRX,TAF6,VPS72,PAXIP1,CHD4,MED23,SMARCAL1,EMSY,KANSL2,RBBP5,EPC2,DIDO1,EP400,SATB2,TAF9,MED4,CXXC1,BRD4,DMAP1,KLF13,ASH2L,PRDM2,WDR5,KDM5A,MTA1,MTA2,ADNP,PRDX4…
GO:CC	organelle	GO:0043226	9.652e-29	28.0154	12827	198	190	21016	HNRNPK,CDC5L,PSPC1,PABPN1,RALY,NONO,SNW1,ZNF48,CGGBP1,POLR2B,CCDC59,SP2,SPTY2D1,SLTM,JUP,NCOA5,ATXN2L,WIZ,SKAP1,NFRKB,RBL2,NELFA,TAF5,CCNT1,MYBBP1A,SATB1,MED12,MEN1,CREBBP,KANSL1,TAF1,MCRS1,HCFC2,KANSL3,EP300,SETD1A,CTBP1,KMT2A,SIN3A,HIRA,ATRX,TAF6,VPS72,PAXIP1,CHD4,MED23,SMARCAL1,EMSY,KANSL2,RBBP5,EPC2,DIDO1,EP400,SATB2,TAF9,MED4,CXXC1,BRD4,DMAP1,KLF13,ASH2L,PRDM2,WDR5,KDM5A,MTA1,MTA2,ADNP,PRDX4…
GO:CC	intracellular anatomical structure	GO:0005622	8.03537e-25	24.095	14111	198	193	21016	HNRNPK,CDC5L,PSPC1,PABPN1,RALY,NONO,SNW1,ZNF48,CGGBP1,POLR2B,CCDC59,SP2,SPTY2D1,SLTM,JUP,NCOA5,ATXN2L,WIZ,SKAP1,NFRKB,RBL2,NELFA,TAF5,CCNT1,MYBBP1A,SATB1,MED12,MEN1,CREBBP,KANSL1,TAF1,MCRS1,HCFC2,KANSL3,EP300,SETD1A,CTBP1,KMT2A,SIN3A,HIRA,ATRX,TAF6,VPS72,PAXIP1,CHD4,MED23,SMARCAL1,EMSY,KANSL2,RBBP5,EPC2,DIDO1,EP400,SATB2,TAF9,MED4,CXXC1,BRD4,DMAP1,KLF13,ASH2L,PRDM2,WDR5,KDM5A,MTA1,MTA2,ADNP,PRDX4…
GO:CC	intracellular membrane-bounded organelle	GO:0043231	1.03037e-24	23.987	11363	198	177	21016	HNRNPK,CDC5L,PSPC1,PABPN1,RALY,NONO,SNW1,ZNF48,CGGBP1,POLR2B,CCDC59,SP2,SPTY2D1,SLTM,JUP,NCOA5,ATXN2L,WIZ,SKAP1,NFRKB,RBL2,NELFA,TAF5,CCNT1,MYBBP1A,SATB1,MED12,MEN1,CREBBP,KANSL1,TAF1,MCRS1,HCFC2,KANSL3,EP300,SETD1A,CTBP1,KMT2A,SIN3A,HIRA,ATRX,TAF6,VPS72,PAXIP1,CHD4,MED23,SMARCAL1,EMSY,KANSL2,RBBP5,EPC2,DIDO1,EP400,SATB2,TAF9,MED4,CXXC1,BRD4,DMAP1,KLF13,ASH2L,PRDM2,WDR5,KDM5A,MTA1,MTA2,ADNP,PRDX4…
GO:CC	protein-containing complex	GO:0032991	3.24612e-24	23.4886	5312	198	121	21016	HNRNPK,CDC5L,PABPN1,RALY,NONO,SNW1,POLR2B,JUP,SKAP1,NFRKB,RBL2,NELFA,TAF5,CCNT1,MYBBP1A,MED12,MEN1,CREBBP,KANSL1,TAF1,MCRS1,HCFC2,KANSL3,EP300,SETD1A,CTBP1,KMT2A,SIN3A,HIRA,TAF6,VPS72,PAXIP1,CHD4,MED23,SMARCAL1,KANSL2,RBBP5,EPC2,EP400,SATB2,TAF9,MED4,CXXC1,BRD4,DMAP1,ASH2L,WDR5,KDM5A,MTA1,MTA2,ADNP,CRNKL1,WBP11,PABPC1,INTS8,ZC3H11A,NCL,AQR,ZC3H13,ZC3H18,ACIN1,RBM15,SFPQ,WTAP,SUN2,VIM,TUBGCP6,KIFC…
GO:CC	membrane-bounded organelle	GO:0043227	5.71121e-23	22.2433	11812	198	178	21016	HNRNPK,CDC5L,PSPC1,PABPN1,RALY,NONO,SNW1,ZNF48,CGGBP1,POLR2B,CCDC59,SP2,SPTY2D1,SLTM,JUP,NCOA5,ATXN2L,WIZ,SKAP1,NFRKB,RBL2,NELFA,TAF5,CCNT1,MYBBP1A,SATB1,MED12,MEN1,CREBBP,KANSL1,TAF1,MCRS1,HCFC2,KANSL3,EP300,SETD1A,CTBP1,KMT2A,SIN3A,HIRA,ATRX,TAF6,VPS72,PAXIP1,CHD4,MED23,SMARCAL1,EMSY,KANSL2,RBBP5,EPC2,DIDO1,EP400,SATB2,TAF9,MED4,CXXC1,BRD4,DMAP1,KLF13,ASH2L,PRDM2,WDR5,KDM5A,MTA1,MTA2,ADNP,PRDX4…
GO:CC	chromosome	GO:0005694	6.80987e-18	17.1669	1242	198	52	21016	HNRNPK,CDC5L,SNW1,POLR2B,NFRKB,RBL2,TAF5,SATB1,MEN1,CREBBP,KANSL1,TAF1,MCRS1,EP300,SETD1A,SIN3A,HIRA,ATRX,PAXIP1,CHD4,SMARCAL1,EP400,SATB2,BRD4,DMAP1,ASH2L,MTA1,MTA2,PARK7,PRDX1,NCL,SFPQ,TMPO,SUN2,MKI67,LMNA,NUMA1,MCM10,NUSAP1,HP1BP3,MORC2A,ARPC3,PPP1CA,CSNK1A1,PPP2R1A,RCC2,HDAC1,HIST2H2BB,SMCHD1,SAP130,SMARCA5,ALDOA
GO:CC	methyltransferase complex	GO:0034708	4.9511e-16	15.3053	98	198	18	21016	MEN1,KANSL1,TAF1,MCRS1,HCFC2,SETD1A,KMT2A,TAF6,PAXIP1,RBBP5,TAF9,CXXC1,ASH2L,WDR5,ZC3H13,RBM15,WTAP,CBLL1
GO:CC	nuclear body	GO:0016604	3.21495e-15	14.4928	787	198	39	21016	CDC5L,PSPC1,PABPN1,NONO,SNW1,SLTM,ATXN2L,NELFA,SATB1,CREBBP,HCFC2,SETD1A,HIRA,ATRX,VPS72,EP400,TAF9,CXXC1,PARK7,CRNKL1,WBP11,ALKBH5,SRSF5,ZC3H13,ZC3H18,FYTTD1,ACIN1,RBM15,POLDIP3,SFPQ,WTAP,MKI67,LMNA,HP1BP3,CBLL1,CSNK1A1,CDK9,TRIP12,SAP130
GO:CC	catalytic complex	GO:1902494	4.42808e-15	14.3538	1334	198	50	21016	HNRNPK,CDC5L,RALY,SNW1,POLR2B,NFRKB,TAF5,CCNT1,MED12,MEN1,CREBBP,KANSL1,TAF1,MCRS1,HCFC2,KANSL3,EP300,SETD1A,KMT2A,SIN3A,TAF6,PAXIP1,CHD4,KANSL2,RBBP5,EPC2,EP400,SATB2,TAF9,CXXC1,BRD4,DMAP1,ASH2L,WDR5,MTA1,MTA2,CRNKL1,PABPC1,AQR,ZC3H13,RBM15,WTAP,CBLL1,PPP1CA,PSMB1,PPP2R1A,CDK9,HDAC1,SAP130,HDAC7
GO:CC	nuclear speck	GO:0016607	4.73977e-15	14.3242	403	198	29	21016	CDC5L,PSPC1,PABPN1,NONO,SNW1,ATXN2L,SETD1A,VPS72,EP400,TAF9,CXXC1,CRNKL1,WBP11,ALKBH5,SRSF5,ZC3H13,ZC3H18,FYTTD1,ACIN1,RBM15,POLDIP3,SFPQ,WTAP,LMNA,HP1BP3,CBLL1,CSNK1A1,TRIP12,SAP130
GO:CC	chromatin	GO:0000785	1.48826e-14	13.8273	609	198	34	21016	HNRNPK,SNW1,NFRKB,RBL2,TAF5,SATB1,MEN1,CREBBP,TAF1,MCRS1,EP300,SETD1A,SIN3A,HIRA,ATRX,CHD4,EP400,SATB2,BRD4,DMAP1,ASH2L,MTA1,MTA2,PARK7,PRDX1,SFPQ,TMPO,HP1BP3,MORC2A,HDAC1,HIST2H2BB,SAP130,SMARCA5,ALDOA
GO:CC	histone methyltransferase complex	GO:0035097	9.89142e-13	12.0047	70	198	14	21016	MEN1,KANSL1,TAF1,MCRS1,HCFC2,SETD1A,KMT2A,TAF6,PAXIP1,RBBP5,TAF9,CXXC1,ASH2L,WDR5
GO:CC	cytosol	GO:0005829	2.65049e-12	11.5767	3849	198	83	21016	HNRNPK,JUP,ATXN2L,SKAP1,RBL2,NELFA,CCNT1,MEN1,HCFC2,EP300,KMT2A,TAF6,KANSL2,TAF9,CXXC1,DMAP1,MTA1,PRDX4,PARK7,PRDX1,WBP11,PABPC1,ALKBH5,SRSF5,ACIN1,ALDH3A1,VIM,ANXA5,LMNA,NUMA1,KPNA2,KIF20B,TCOF1,CEP170,SFN,AGAP2,EIF4G2,MORC2A,SPAST,KPNB1,G3BP1,NUP153,PRRC2A,LCK,VASP,RAC2,WASL,TWF1,INPP5D,PPP1CA,ANXA2,CSNK1A1,PSMB1,RPL7A,RPL27A,RPL7,RPS2,RPL6,RPL27,RPS18,RPL23,RPL32,UBA52,RPL36A,RPS9,PPP2R1A,RPL2…
GO:CC	supramolecular complex	GO:0099080	4.25015e-12	11.3716	1296	198	45	21016	HNRNPK,JUP,ATXN2L,KANSL1,SIN3A,MTA1,PABPC1,NCL,POLDIP3,VIM,ANXA5,LMNA,TUBGCP6,TPX2,KIFC5B,NUMA1,KPNA2,TUBGCP3,KIF20B,GTSE1,TUBGCP2,NUSAP1,KIFC1,CEP170,RPUSD4,SPAST,KPNB1,G3BP1,ACTN1,ARPC3,RAC2,SPECC1L,WIPF1,WASL,TWF1,INPP5D,CSNK1A1,RPL7,RPL6,RCC2,CDK9,PRRC2C,MARK2,ALDOA,ANXA1
GO:CC	MLL1 complex	GO:0071339	3.32852e-11	10.4777	30	198	10	21016	KANSL1,TAF1,MCRS1,HCFC2,KMT2A,TAF6,RBBP5,TAF9,ASH2L,WDR5
GO:CC	MLL1/2 complex	GO:0044665	3.32852e-11	10.4777	30	198	10	21016	KANSL1,TAF1,MCRS1,HCFC2,KMT2A,TAF6,RBBP5,TAF9,ASH2L,WDR5
GO:CC	transferase complex	GO:1990234	2.13581e-10	9.67044	748	198	32	21016	SNW1,POLR2B,TAF5,CCNT1,MED12,MEN1,CREBBP,KANSL1,TAF1,MCRS1,HCFC2,KANSL3,EP300,SETD1A,KMT2A,TAF6,PAXIP1,KANSL2,RBBP5,EPC2,EP400,TAF9,CXXC1,BRD4,DMAP1,ASH2L,WDR5,ZC3H13,RBM15,WTAP,CBLL1,CDK9
GO:CC	histone acetyltransferase complex	GO:0000123	3.21483e-10	9.49284	84	198	13	21016	TAF5,CREBBP,KANSL1,MCRS1,KANSL3,EP300,TAF6,KANSL2,EPC2,EP400,TAF9,DMAP1,WDR5
GO:CC	ribonucleoprotein complex	GO:1990904	5.16929e-10	9.28657	725	198	31	21016	HNRNPK,CDC5L,PABPN1,RALY,SNW1,MCRS1,TAF9,CRNKL1,WBP11,PABPC1,NCL,AQR,ZC3H18,VIM,PKP1,G3BP1,CSNK1A1,RPL7A,RPL27A,RPL7,RPS2,RPL6,RPL27,RPS18,RPL23,RPL32,UBA52,RPL36A,RPS9,RPL24,RPL17
GO:CC	nuclear periphery	GO:0034399	5.85587e-10	9.23241	132	198	15	21016	PSPC1,NONO,SNW1,SATB1,MEN1,PAXIP1,SATB2,CXXC1,SFPQ,VIM,LMNA,NUMA1,MORC2A,NUP205,NUP153
GO:CC	acetyltransferase complex	GO:1902493	1.63785e-09	8.78572	95	198	13	21016	TAF5,CREBBP,KANSL1,MCRS1,KANSL3,EP300,TAF6,KANSL2,EPC2,EP400,TAF9,DMAP1,WDR5
GO:CC	protein acetyltransferase complex	GO:0031248	1.63785e-09	8.78572	95	198	13	21016	TAF5,CREBBP,KANSL1,MCRS1,KANSL3,EP300,TAF6,KANSL2,EPC2,EP400,TAF9,DMAP1,WDR5
GO:CC	nuclear matrix	GO:0016363	6.03608e-09	8.21925	105	198	13	21016	PSPC1,NONO,SNW1,SATB1,MEN1,PAXIP1,SATB2,CXXC1,SFPQ,VIM,LMNA,NUMA1,MORC2A
GO:CC	cytosolic ribosome	GO:0022626	1.38683e-08	7.85798	112	198	13	21016	RPL7A,RPL27A,RPL7,RPS2,RPL6,RPL27,RPS18,RPL23,RPL32,UBA52,RPL36A,RPS9,RPL24
GO:CC	cytosolic large ribosomal subunit	GO:0022625	1.27146e-07	6.8957	64	198	10	21016	RPL7A,RPL27A,RPL7,RPL6,RPL27,RPL23,RPL32,UBA52,RPL36A,RPL24
GO:CC	polymeric cytoskeletal fiber	GO:0099513	1.63906e-07	6.7854	752	198	28	21016	JUP,MTA1,VIM,LMNA,TUBGCP6,TPX2,KIFC5B,NUMA1,TUBGCP3,KIF20B,GTSE1,TUBGCP2,NUSAP1,KIFC1,CEP170,SPAST,ACTN1,ARPC3,RAC2,SPECC1L,WIPF1,WASL,TWF1,INPP5D,CSNK1A1,RCC2,MARK2,ANXA1
GO:CC	nucleolus	GO:0005730	1.82045e-07	6.73982	916	198	31	21016	PSPC1,NONO,SPTY2D1,RBL2,MYBBP1A,TAF1,MCRS1,SIN3A,RBBP5,KDM5A,PRDX1,SRSF5,NCL,ACIN1,TRA2A,MKI67,MCM10,KIF20B,NUSAP1,TCOF1,NUP153,TWF1,PPP1CA,RPL7A,RPL6,RPL27,RPL23,RPS9,RCC2,SMARCA5,DNAJB1
GO:CC	supramolecular fiber	GO:0099512	2.62136e-07	6.58147	986	198	32	21016	JUP,MTA1,VIM,ANXA5,LMNA,TUBGCP6,TPX2,KIFC5B,NUMA1,TUBGCP3,KIF20B,GTSE1,TUBGCP2,NUSAP1,KIFC1,CEP170,SPAST,ACTN1,ARPC3,RAC2,SPECC1L,WIPF1,WASL,TWF1,INPP5D,CSNK1A1,RPL7,RPL6,RCC2,MARK2,ALDOA,ANXA1
GO:CC	supramolecular polymer	GO:0099081	3.11995e-07	6.50585	993	198	32	21016	JUP,MTA1,VIM,ANXA5,LMNA,TUBGCP6,TPX2,KIFC5B,NUMA1,TUBGCP3,KIF20B,GTSE1,TUBGCP2,NUSAP1,KIFC1,CEP170,SPAST,ACTN1,ARPC3,RAC2,SPECC1L,WIPF1,WASL,TWF1,INPP5D,CSNK1A1,RPL7,RPL6,RCC2,MARK2,ALDOA,ANXA1
GO:CC	histone deacetylase complex	GO:0000118	3.17087e-07	6.49882	70	198	10	21016	SIN3A,CHD4,EP400,SATB2,DMAP1,MTA1,MTA2,HDAC1,SAP130,HDAC7
GO:CC	ribosomal subunit	GO:0044391	2.07536e-06	5.68291	200	198	14	21016	RPL7A,RPL27A,RPL7,RPS2,RPL6,RPL27,RPS18,RPL23,RPL32,UBA52,RPL36A,RPS9,RPL24,RPL17
GO:CC	H4 histone acetyltransferase complex	GO:1902562	4.3817e-06	5.35836	48	198	8	21016	KANSL1,MCRS1,KANSL3,KANSL2,EPC2,EP400,DMAP1,WDR5
GO:CC	SWI/SNF superfamily-type complex	GO:0070603	5.74571e-06	5.24066	70	198	9	21016	NFRKB,MCRS1,CHD4,EP400,DMAP1,MTA1,MTA2,HDAC1,SMARCA5
GO:CC	large ribosomal subunit	GO:0015934	9.25167e-06	5.03378	126	198	11	21016	RPL7A,RPL27A,RPL7,RPL6,RPL27,RPL23,RPL32,UBA52,RPL36A,RPL24,RPL17
GO:CC	ribosome	GO:0005840	1.68437e-05	4.77356	236	198	14	21016	RPL7A,RPL27A,RPL7,RPS2,RPL6,RPL27,RPS18,RPL23,RPL32,UBA52,RPL36A,RPS9,RPL24,RPL17
GO:CC	Set1C/COMPASS complex	GO:0048188	2.54237e-05	4.59476	13	198	5	21016	SETD1A,RBBP5,CXXC1,ASH2L,WDR5
GO:CC	transcription regulator complex	GO:0005667	6.99818e-05	4.15501	444	198	18	21016	NONO,RBL2,TAF5,TAF1,EP300,CTBP1,SIN3A,TAF6,CHD4,MED23,SATB2,TAF9,MED4,MTA1,MTA2,ADNP,SFPQ,HDAC1
GO:CC	actin filament	GO:0005884	7.21094e-05	4.14201	122	198	10	21016	ACTN1,ARPC3,RAC2,SPECC1L,WIPF1,WASL,TWF1,INPP5D,MARK2,ANXA1
GO:CC	NSL complex	GO:0044545	7.78786e-05	4.10858	7	198	4	21016	KANSL1,MCRS1,KANSL3,KANSL2
GO:CC	ATPase complex	GO:1904949	0.000110809	3.95542	98	198	9	21016	NFRKB,MCRS1,CHD4,EP400,DMAP1,MTA1,MTA2,HDAC1,SMARCA5
GO:CC	nuclear chromosome	GO:0000228	0.000115388	3.93784	319	198	15	21016	CDC5L,NFRKB,MCRS1,SIN3A,ATRX,SMARCAL1,EP400,BRD4,DMAP1,SUN2,MCM10,HDAC1,SMCHD1,SAP130,SMARCA5
GO:CC	RNA N6-methyladenosine methyltransferase complex	GO:0036396	0.000154608	3.81077	8	198	4	21016	ZC3H13,RBM15,WTAP,CBLL1
GO:CC	cyclin/CDK positive transcription elongation factor complex	GO:0008024	0.000154608	3.81077	8	198	4	21016	SNW1,CCNT1,BRD4,CDK9
GO:CC	gamma-tubulin small complex	GO:0008275	0.000245166	3.61054	3	198	3	21016	TUBGCP6,TUBGCP3,TUBGCP2
GO:CC	mRNA editing complex	GO:0045293	0.00027624	3.55871	9	198	4	21016	ZC3H13,RBM15,WTAP,CBLL1
GO:CC	ribonucleoprotein granule	GO:0035770	0.000885118	3.053	239	198	12	21016	HNRNPK,ATXN2L,PABPC1,NCL,POLDIP3,KPNA2,RPUSD4,KPNB1,G3BP1,RPL6,CDK9,PRRC2C
GO:CC	nuclear cyclin-dependent protein kinase holoenzyme complex	GO:0019908	0.0010614	2.97412	12	198	4	21016	SNW1,CCNT1,BRD4,CDK9
GO:CC	polysome	GO:0005844	0.00127982	2.89285	70	198	7	21016	MCRS1,VIM,RPL7A,RPL7,RPL6,RPL32,RPL24
GO:CC	actin cytoskeleton	GO:0015629	0.00137923	2.86036	493	198	17	21016	HNRNPK,JUP,NCOA5,TAF5,KANSL2,ACTN1,CAPZA1,ARPC3,RAC2,SPECC1L,WIPF1,WASL,TWF1,INPP5D,MARK2,ALDOA,ANXA1
GO:CC	MLL3/4 complex	GO:0044666	0.00211487	2.67472	14	198	4	21016	PAXIP1,RBBP5,ASH2L,WDR5
GO:CC	equatorial microtubule organizing center	GO:0000923	0.00241766	2.61661	5	198	3	21016	TUBGCP6,TUBGCP3,TUBGCP2
GO:CC	cytoplasmic ribonucleoprotein granule	GO:0036464	0.00309285	2.50964	226	198	11	21016	HNRNPK,ATXN2L,PABPC1,NCL,POLDIP3,KPNA2,KPNB1,G3BP1,RPL6,CDK9,PRRC2C
GO:CC	cytoplasmic stress granule	GO:0010494	0.00313271	2.50408	80	198	7	21016	HNRNPK,ATXN2L,PABPC1,KPNA2,KPNB1,G3BP1,PRRC2C
GO:CC	CHD-type complex	GO:0090545	0.00378878	2.4215	16	198	4	21016	CHD4,MTA1,MTA2,HDAC1
GO:CC	NuRD complex	GO:0016581	0.00378878	2.4215	16	198	4	21016	CHD4,MTA1,MTA2,HDAC1
GO:CC	paraspeckles	GO:0042382	0.00480169	2.31861	6	198	3	21016	PSPC1,NONO,SFPQ
GO:CC	spindle	GO:0005819	0.00530885	2.275	384	198	14	21016	DIDO1,TUBGCP6,TPX2,KIFC5B,NUMA1,TUBGCP3,KIF20B,TUBGCP2,NUSAP1,KIFC1,CEP170,SPAST,SPECC1L,RCC2
GO:CC	cytoplasm	GO:0005737	0.00763697	2.11708	11093	198	133	21016	HNRNPK,CDC5L,PSPC1,PABPN1,SNW1,JUP,ATXN2L,SKAP1,RBL2,NELFA,CCNT1,MYBBP1A,MEN1,CREBBP,MCRS1,HCFC2,EP300,CTBP1,KMT2A,ATRX,TAF6,CHD4,KANSL2,DIDO1,TAF9,CXXC1,DMAP1,PRDM2,MTA1,ADNP,PRDX4,PARK7,PRDX1,WBP11,PABPC1,ALKBH5,SRSF5,NCL,ACIN1,POLDIP3,SFPQ,WTAP,SUN2,ALDH3A1,MKI67,VIM,ANXA5,LMNA,TUBGCP6,TPX2,NUMA1,KPNA2,TUBGCP3,KIF20B,GTSE1,TUBGCP2,TMED9,NUSAP1,KIFC1,TCOF1,CEP170,SFN,AGAP2,EIF4G2,MORC2A,PGAM5,R…
GO:CC	RNA polymerase II transcription regulator complex	GO:0090575	0.0081963	2.08638	165	198	9	21016	NONO,TAF5,TAF1,TAF6,CHD4,TAF9,MED4,ADNP,SFPQ
GO:CC	catalytic step 2 spliceosome	GO:0071013	0.00903374	2.04413	94	198	7	21016	HNRNPK,CDC5L,RALY,SNW1,CRNKL1,PABPC1,AQR
GO:CC	chromosomal region	GO:0098687	0.00929565	2.03172	302	198	12	21016	POLR2B,MEN1,KANSL1,SIN3A,ATRX,SUN2,MKI67,PPP1CA,CSNK1A1,PPP2R1A,RCC2,SMCHD1
GO:CC	carboxy-terminal domain protein kinase complex	GO:0032806	0.00979244	2.00911	20	198	4	21016	SNW1,CCNT1,BRD4,CDK9
GO:CC	microtubule	GO:0005874	0.0164737	1.78321	426	198	14	21016	MTA1,TUBGCP6,TPX2,KIFC5B,NUMA1,TUBGCP3,KIF20B,GTSE1,TUBGCP2,NUSAP1,KIFC1,CEP170,SPAST,RCC2
GO:CC	INO80-type complex	GO:0097346	0.0175054	1.75683	23	198	4	21016	NFRKB,MCRS1,EP400,DMAP1
GO:CC	cytoskeleton	GO:0005856	0.020193	1.6948	2268	198	40	21016	HNRNPK,JUP,NCOA5,TAF5,CHD4,KANSL2,DIDO1,TAF9,MTA1,VIM,LMNA,TUBGCP6,TPX2,KIFC5B,NUMA1,TUBGCP3,KIF20B,GTSE1,TUBGCP2,NUSAP1,KIFC1,CEP170,SPAST,ACTN1,LCK,CAPZA1,EVL,ARPC3,VASP,RAC2,SPECC1L,WIPF1,WASL,TWF1,INPP5D,CSNK1A1,RCC2,MARK2,ALDOA,ANXA1
GO:CC	cellular anatomical entity	GO:0110165	0.0249439	1.60304	19567	198	196	21016	HNRNPK,CDC5L,PSPC1,PABPN1,RALY,NONO,SNW1,ZNF48,CGGBP1,POLR2B,CCDC59,SP2,SPTY2D1,SLTM,JUP,NCOA5,ATXN2L,WIZ,SKAP1,NFRKB,RBL2,NELFA,TAF5,CCNT1,MYBBP1A,SATB1,MED12,MEN1,CREBBP,KANSL1,TAF1,MCRS1,HCFC2,KANSL3,EP300,SETD1A,CTBP1,KMT2A,SIN3A,HIRA,ATRX,TAF6,VPS72,PAXIP1,CHD4,MED23,SMARCAL1,EMSY,KANSL2,RBBP5,EPC2,DIDO1,EP400,SATB2,TAF9,MED4,CXXC1,BRD4,DMAP1,KLF13,ASH2L,PRDM2,WDR5,KDM5A,MTA1,MTA2,ADNP,PRDX4…
GO:CC	P-TEFb complex	GO:0070691	0.0262853	1.58029	2	198	2	21016	CCNT1,CDK9
GO:CC	transcription elongation factor complex	GO:0008023	0.0315401	1.50114	50	198	5	21016	SNW1,NELFA,CCNT1,BRD4,CDK9
GO:CC	mitotic spindle	GO:0072686	0.0323581	1.49002	154	198	8	21016	TPX2,KIFC5B,NUMA1,KIF20B,NUSAP1,KIFC1,CEP170,RCC2
GO:CC	intracellular protein-containing complex	GO:0140535	0.0433492	1.36302	712	198	18	21016	POLR2B,TAF5,MED12,CREBBP,KANSL1,TAF1,MCRS1,KANSL3,EP300,TAF6,KANSL2,EPC2,EP400,TAF9,DMAP1,WDR5,PSMB1,PPP2R1A

## Sheet: Reactome Pathways
source	term_name	term_id	adjusted_p_value	negative_log10_of_adjusted_p_value	term_size	query_size	intersection_size	effective_domain_size	intersections
REAC	Metabolism of RNA	REAC:R-MMU-8953854	1.56802e-08	7.80465	532	132	31	8631	HNRNPK,CDC5L,PABPN1,POLR2B,CRNKL1,WBP11,PABPC1,ZC3H11A,SRSF5,NCL,AQR,FYTTD1,POLDIP3,WTAP,NUP205,NUP153,PSMB1,RPL7A,RPL27A,RPL7,RPS2,RPL6,RPL27,RPS18,RPL23,RPL32,UBA52,RPL36A,RPS9,PPP2R1A,RPL24
REAC	Nonsense Mediated Decay (NMD) independent of the Exon Junction Complex (EJC)	REAC:R-MMU-975956	2.20708e-08	7.65618	91	132	14	8631	PABPC1,RPL7A,RPL27A,RPL7,RPS2,RPL6,RPL27,RPS18,RPL23,RPL32,UBA52,RPL36A,RPS9,RPL24
REAC	Nonsense Mediated Decay (NMD) enhanced by the Exon Junction Complex (EJC)	REAC:R-MMU-975957	2.64818e-08	7.57705	110	132	15	8631	PABPC1,RPL7A,RPL27A,RPL7,RPS2,RPL6,RPL27,RPS18,RPL23,RPL32,UBA52,RPL36A,RPS9,PPP2R1A,RPL24
REAC	Nonsense-Mediated Decay (NMD)	REAC:R-MMU-927802	2.64818e-08	7.57705	110	132	15	8631	PABPC1,RPL7A,RPL27A,RPL7,RPS2,RPL6,RPL27,RPS18,RPL23,RPL32,UBA52,RPL36A,RPS9,PPP2R1A,RPL24
REAC	SRP-dependent cotranslational protein targeting to membrane	REAC:R-MMU-1799339	2.12521e-07	6.6726	89	132	13	8631	RPL7A,RPL27A,RPL7,RPS2,RPL6,RPL27,RPS18,RPL23,RPL32,UBA52,RPL36A,RPS9,RPL24
REAC	L13a-mediated translational silencing of Ceruloplasmin expression	REAC:R-MMU-156827	2.31809e-07	6.63487	108	132	14	8631	PABPC1,RPL7A,RPL27A,RPL7,RPS2,RPL6,RPL27,RPS18,RPL23,RPL32,UBA52,RPL36A,RPS9,RPL24
REAC	Cap-dependent Translation Initiation	REAC:R-MMU-72737	6.05601e-07	6.21781	116	132	14	8631	PABPC1,RPL7A,RPL27A,RPL7,RPS2,RPL6,RPL27,RPS18,RPL23,RPL32,UBA52,RPL36A,RPS9,RPL24
REAC	Eukaryotic Translation Initiation	REAC:R-MMU-72613	6.05601e-07	6.21781	116	132	14	8631	PABPC1,RPL7A,RPL27A,RPL7,RPS2,RPL6,RPL27,RPS18,RPL23,RPL32,UBA52,RPL36A,RPS9,RPL24
REAC	Formation of a pool of free 40S subunits	REAC:R-MMU-72689	7.22954e-07	6.14089	98	132	13	8631	RPL7A,RPL27A,RPL7,RPS2,RPL6,RPL27,RPS18,RPL23,RPL32,UBA52,RPL36A,RPS9,RPL24
REAC	GTP hydrolysis and joining of the 60S ribosomal subunit	REAC:R-MMU-72706	2.72803e-06	5.56415	109	132	13	8631	RPL7A,RPL27A,RPL7,RPS2,RPL6,RPL27,RPS18,RPL23,RPL32,UBA52,RPL36A,RPS9,RPL24
REAC	Gene expression (Transcription)	REAC:R-MMU-74160	1.49879e-05	4.82426	1042	132	39	8631	PABPN1,POLR2B,NELFA,CCNT1,MYBBP1A,MED12,MEN1,TAF1,EP300,SETD1A,KMT2A,SIN3A,TAF6,CHD4,RBBP5,TAF9,MED4,ASH2L,WDR5,MTA1,MTA2,PRDX1,INTS8,ZC3H11A,SRSF5,FYTTD1,POLDIP3,TPX2,SFN,NUP205,NUP153,PSMB1,UBA52,PPP2R1A,CDK9,HDAC1,HIST2H2BB,HDAC7,SMARCA5
REAC	Chromatin modifying enzymes	REAC:R-MMU-3247509	1.77567e-05	4.75064	201	132	16	8631	KANSL1,MCRS1,KANSL3,SETD1A,KMT2A,CHD4,KANSL2,RBBP5,ASH2L,WDR5,KDM5A,MTA1,MTA2,RPS2,HDAC1,HIST2H2BB
REAC	Chromatin organization	REAC:R-MMU-4839726	1.77567e-05	4.75064	201	132	16	8631	KANSL1,MCRS1,KANSL3,SETD1A,KMT2A,CHD4,KANSL2,RBBP5,ASH2L,WDR5,KDM5A,MTA1,MTA2,RPS2,HDAC1,HIST2H2BB
REAC	Major pathway of rRNA processing in the nucleolus and cytosol	REAC:R-MMU-6791226	6.64856e-05	4.17727	167	132	14	8631	NCL,RPL7A,RPL27A,RPL7,RPS2,RPL6,RPL27,RPS18,RPL23,RPL32,UBA52,RPL36A,RPS9,RPL24
REAC	rRNA processing in the nucleus and cytosol	REAC:R-MMU-8868773	6.64856e-05	4.17727	167	132	14	8631	NCL,RPL7A,RPL27A,RPL7,RPS2,RPL6,RPL27,RPS18,RPL23,RPL32,UBA52,RPL36A,RPS9,RPL24
REAC	rRNA processing	REAC:R-MMU-72312	6.64856e-05	4.17727	167	132	14	8631	NCL,RPL7A,RPL27A,RPL7,RPS2,RPL6,RPL27,RPS18,RPL23,RPL32,UBA52,RPL36A,RPS9,RPL24
REAC	RNA Polymerase II Transcription	REAC:R-MMU-73857	0.000368913	3.43308	946	132	34	8631	PABPN1,POLR2B,NELFA,CCNT1,MED12,MEN1,TAF1,EP300,SETD1A,KMT2A,SIN3A,TAF6,CHD4,RBBP5,TAF9,MED4,ASH2L,WDR5,MTA2,PRDX1,INTS8,ZC3H11A,SRSF5,FYTTD1,POLDIP3,TPX2,SFN,PSMB1,UBA52,PPP2R1A,CDK9,HDAC1,HIST2H2BB,HDAC7
REAC	SUMO E3 ligases SUMOylate target proteins	REAC:R-MMU-3108232	0.000726073	3.13902	148	132	12	8631	HNRNPK,SATB1,EP300,CTBP1,SIN3A,SATB2,MTA1,PARK7,NUP205,NUP153,HDAC1,HDAC7
REAC	Transcriptional Regulation by TP53	REAC:R-MMU-3700989	0.000915288	3.03844	269	132	16	8631	POLR2B,NELFA,CCNT1,TAF1,EP300,TAF6,CHD4,TAF9,MTA2,PRDX1,TPX2,SFN,UBA52,PPP2R1A,CDK9,HDAC1
REAC	SUMOylation	REAC:R-MMU-2990846	0.00102955	2.98735	153	132	12	8631	HNRNPK,SATB1,EP300,CTBP1,SIN3A,SATB2,MTA1,PARK7,NUP205,NUP153,HDAC1,HDAC7
REAC	Translation	REAC:R-MMU-72766	0.00155252	2.80896	217	132	14	8631	PABPC1,RPL7A,RPL27A,RPL7,RPS2,RPL6,RPL27,RPS18,RPL23,RPL32,UBA52,RPL36A,RPS9,RPL24
REAC	RUNX1 regulates genes involved in megakaryocyte differentiation and platelet function	REAC:R-MMU-8936459	0.00174153	2.75907	86	132	9	8631	EP300,SETD1A,KMT2A,SIN3A,RBBP5,ASH2L,WDR5,HDAC1,HIST2H2BB
REAC	Processing of Capped Intron-Containing Pre-mRNA	REAC:R-MMU-72203	0.00212907	2.67181	223	132	14	8631	HNRNPK,CDC5L,PABPN1,POLR2B,CRNKL1,WBP11,ZC3H11A,SRSF5,AQR,FYTTD1,POLDIP3,WTAP,NUP205,NUP153
REAC	Formation of the beta-catenin:TCF transactivating complex	REAC:R-MMU-201722	0.00487385	2.31213	22	132	5	8631	MEN1,EP300,RBBP5,ASH2L,HDAC1
REAC	Regulation of TP53 Activity	REAC:R-MMU-5633007	0.0106977	1.97071	134	132	10	8631	TAF1,EP300,TAF6,CHD4,TAF9,MTA2,TPX2,UBA52,PPP2R1A,HDAC1
REAC	Generic Transcription Pathway	REAC:R-MMU-212436	0.0135358	1.86852	832	132	28	8631	POLR2B,NELFA,CCNT1,MED12,MEN1,TAF1,EP300,SETD1A,KMT2A,SIN3A,TAF6,CHD4,RBBP5,TAF9,MED4,ASH2L,WDR5,MTA2,PRDX1,TPX2,SFN,PSMB1,UBA52,PPP2R1A,CDK9,HDAC1,HIST2H2BB,HDAC7
REAC	TCF dependent signaling in response to WNT	REAC:R-MMU-201681	0.0186527	1.72926	143	132	10	8631	MEN1,EP300,CTBP1,RBBP5,ASH2L,CSNK1A1,PSMB1,UBA52,PPP2R1A,HDAC1
REAC	RNA Polymerase II Pre-transcription Events	REAC:R-MMU-674695	0.0289221	1.53877	71	132	7	8631	POLR2B,NELFA,CCNT1,TAF1,TAF6,TAF9,CDK9
REAC	Transcriptional activity of SMAD2/SMAD3:SMAD4 heterotrimer	REAC:R-MMU-2173793	0.0383789	1.41591	33	132	5	8631	CCNT1,MEN1,UBA52,CDK9,HDAC1
REAC	Cell Cycle	REAC:R-MMU-1640170	0.0483048	1.31601	577	132	21	8631	RBL2,ATRX,TUBGCP6,TPX2,NUMA1,TUBGCP3,MCM10,GTSE1,TUBGCP2,SFN,SPAST,KPNB1,NUP205,NUP153,PSMB1,UBA52,PPP2R1A,RCC2,HDAC1,HIST2H2BB,SMARCA5
